# Supplementary material for: The Emerging Plasticizer Alternative DINCH and Its Metabolite MINCH Induce Oxidative Stress and Enhance Inflammatory Responses in Human THP-1 Macrophages
Source: MDPI journal article supplement (doi:10.3390/cells10092367), 2021-09-09
Supplement: s1 [file s1]

## Supplement 1

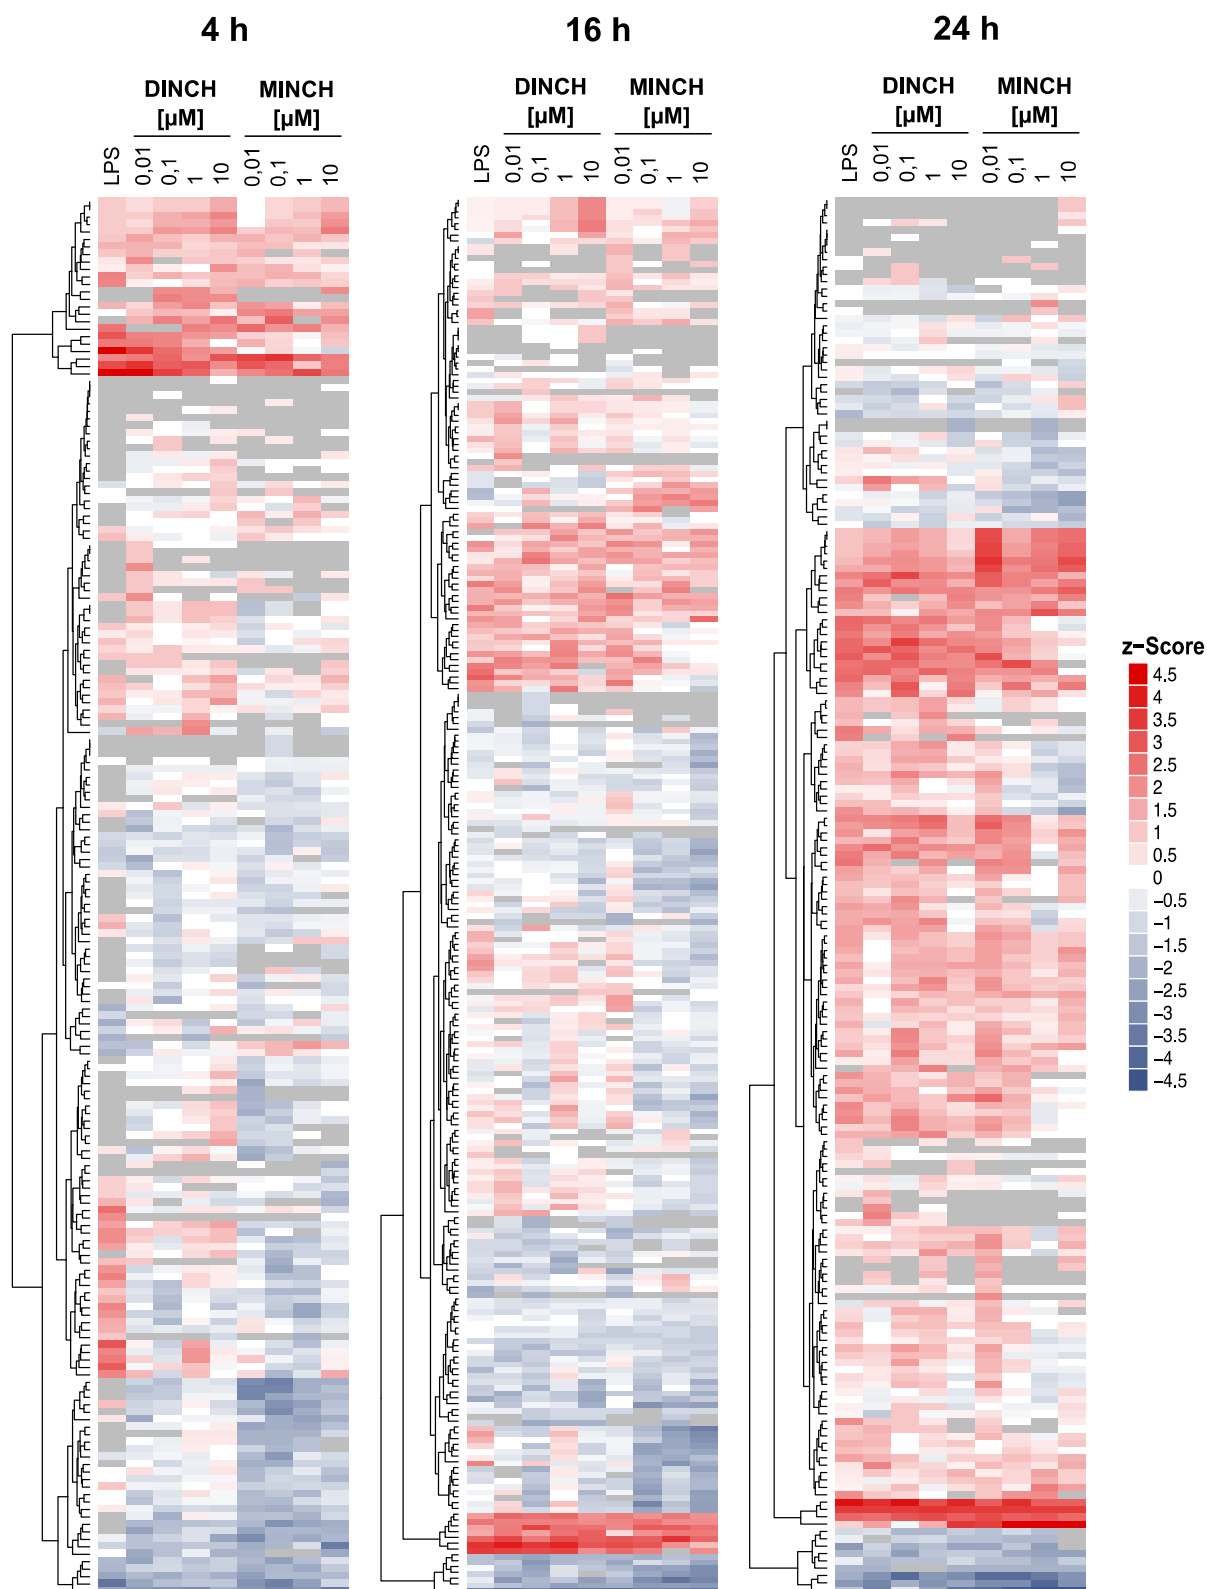

**Figure S1:** All enriched pathways obtained by Ingenuity Pathway Analysis (IPA) for the exposure of THP-1 macrophages to DINCH and MINCH. THP-1 macrophages were exposed to 10 nM – 10 μM of compound for 4 h, 16 h, and 24 h. Fold changes were calculated relative to the unstimulated control containing equivalent amounts of solvent (0.01% MeOH). Significant changes are labeled with asterisks (\*  $p \leq 0.05$ , \*\*  $p \leq 0.01$ , \*\*\*  $p \leq 0.001$ ,  $n=4$ ).

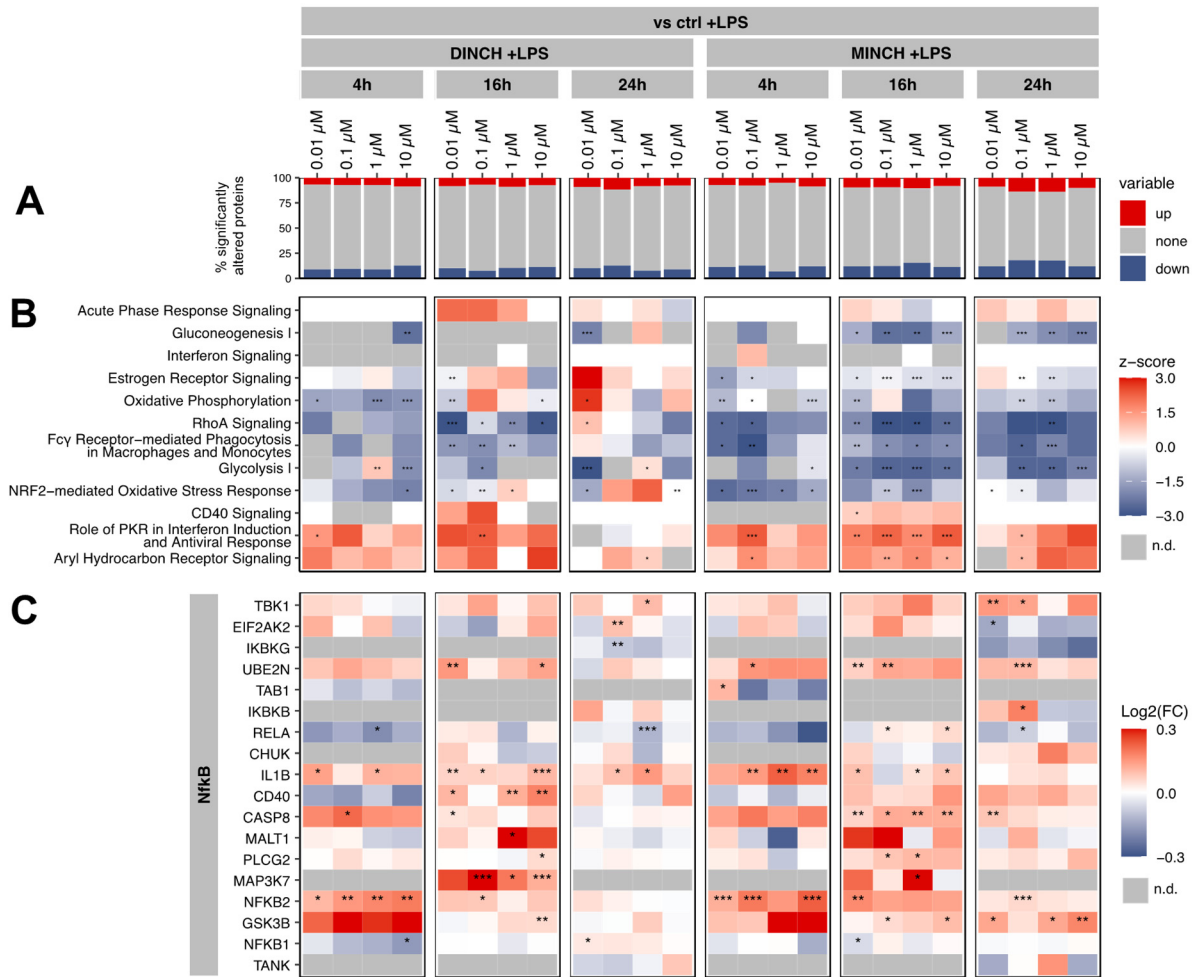

**Figure S2: Proteomics analysis of DINCH and MINCH in THP-1 macrophages using Log<sub>2</sub>(FCs) of treatment vs LPS-stimulated control.** Differentiated THP-1 cells were treated with increasing concentrations of DINCH and MINCH for 4, 16, and 24 h. Fold changes (FCs) of the treatments to the LPS-stimulated control containing an equivalent amount of MeOH were calculated. (A) Percentage of significantly ( $p \leq 0.05$ ,  $n=4$ ) altered proteins after exposure of THP-1 cells which were subjected to Ingenuity Pathway Analysis (IPA). (B) Heatmap of selected significantly (adjusted  $p \leq 0.05$ ) enriched pathways in treated THP-1 cells. The heatmap is colored based on z-scores calculated by IPA, indicating the direction of pathway regulation (z-score  $> 0$  pathway is up-regulated, z-score  $< 0$  pathway is down-regulated, not detected is marked in grey). Significant changes are labeled with asterisks (\*  $p \leq 0.05$ , \*\*  $p \leq 0.01$ , \*\*\*  $p \leq 0.001$ ,  $n=4$ ). (C) NF- $\kappa$ B associated proteins for the exposure of THP-1 macrophages to DINCH and MINCH. Significant changes are labeled with asterisks (\*  $p \leq 0.05$ , \*\*  $p \leq 0.01$ , \*\*\*  $p \leq 0.001$ ,  $n=4$ ).

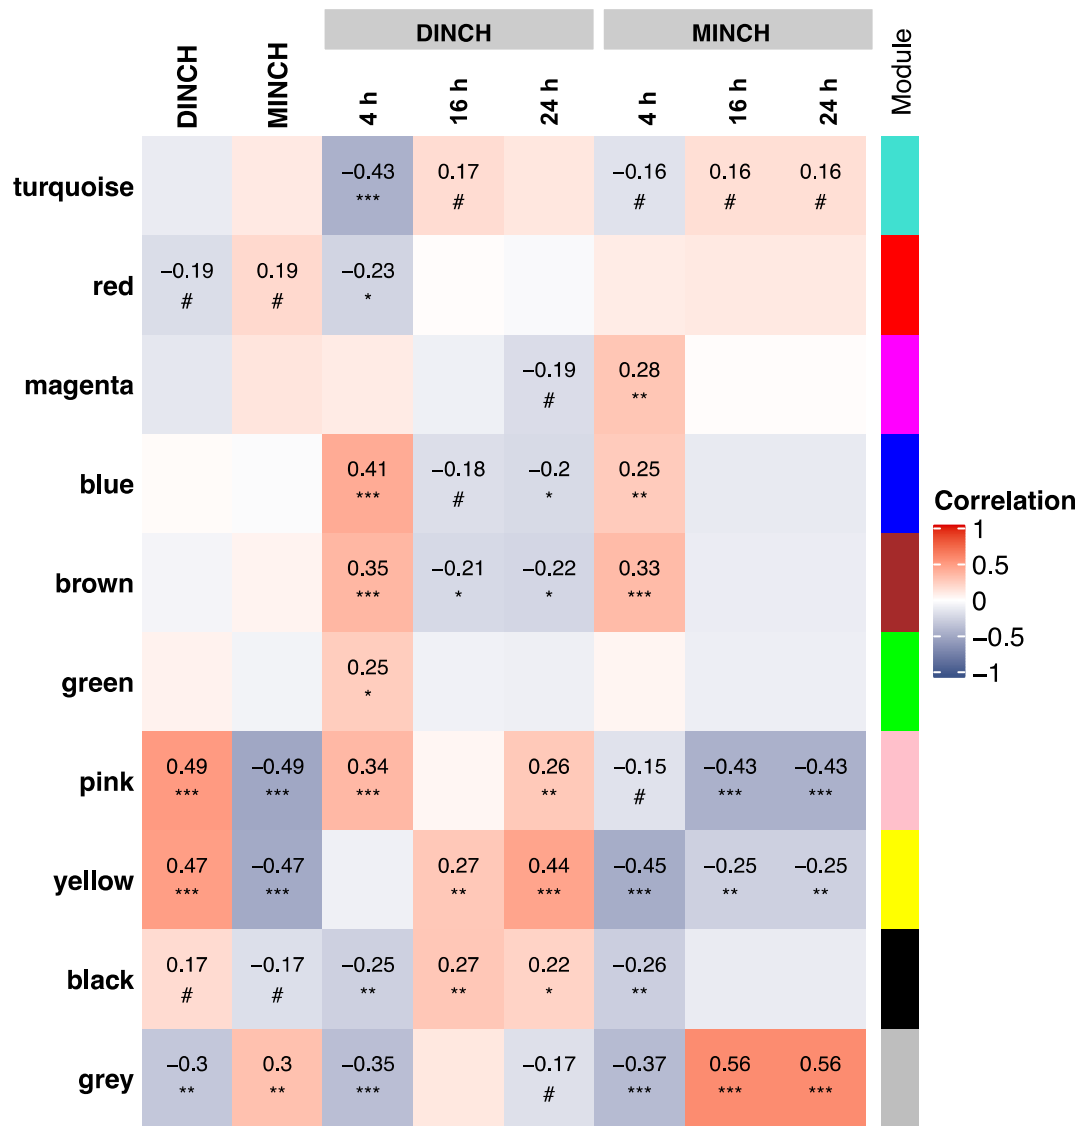

Figure S3: Full module-trait correlation obtained by WGCNA of treatment vs LPS-stimulated control. Displayed are all ten obtained modules of co-expressed proteins correlated with compound treatment (DINCH/MINCH) and time point (4 h, 16 h, 24 h). The heatmap is colored according to the correlation and significance of correlation is indicated (#  $p \leq 0.01$ , \*  $p \leq 0.05$ , \*\*  $p \leq 0.01$ , \*\*\*  $p \leq 0.001$ ).

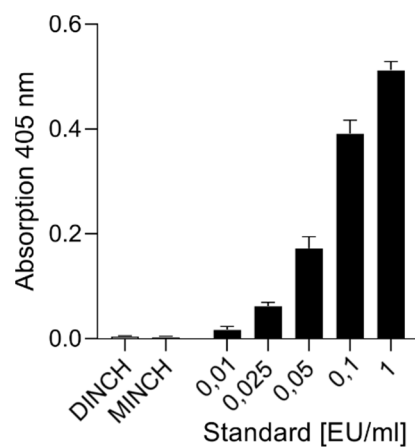

*Figure S4: Endotoxin-Assay of 10  $\mu$ M DINCH und MINCH. Displayed are the absorbances of the highest tested concentration (10  $\mu$ M) of DINCH and MINCH and endotoxin standard dilutions. Data are depicted as mean  $\pm$  SD,  $n=3$ .*
