# Supplementary material for: The Emerging Plasticizer Alternative DINCH and Its Metabolite MINCH Induce Oxidative Stress and Enhance Inflammatory Responses in Human THP-1 Macrophages
Source: Cells. 2021 Sep 9;10(9):2367. doi: 10.3390/cells10092367 (PMC8466537; doi:10.3390/cells10092367)
Supplement: Supplementary file 1 [file cells-10-02367-s001.zip]

Archive with 10 entries (10 files):
- Supplement 1.pdf
- Supplement 10.csv
- Supplement 2.csv
- Supplement 3.csv
- Supplement 4.csv
- Supplement 5.csv
- Supplement 6.csv
- Supplement 7.csv
- Supplement 8.csv
- Supplement 9.csv
