# Supplementary material for: The Emerging Plasticizer Alternative DINCH and Its Metabolite MINCH Induce Oxidative Stress and Enhance Inflammatory Responses in Human THP-1 Macrophages
Source: Cells. 2021 Sep 9;10(9):2367. doi: 10.3390/cells10092367 (PMC8466537; doi:10.3390/cells10092367)
Supplement: Supplementary file 1 [file cells-10-02367-s001.zip › Supplement 2.csv]

Accession	4h_ctrlLPS_ctrlnoLPS	4h_DINCH_10nM_ctrlnoLPS	4h_DINCH_100nM_ctrlnoLPS	4h_DINCH_1000nM_ctrlnoLPS	4h_MINCH_10nM_ctrlnoLPS	4h_MINCH_100nM_ctrlnoLPS	4h_MINCH_1000nM_ctrlnoLPS	4h_MINCH_10000nM_ctrlnoLPS	4h_DINCH_10000nM_ctrlnoLPS	4h_ctrlLPS_ctrlnoLPS	4h_DINCH_10nM_ctrlnoLPS	4h_DINCH_100nM_ctrlnoLPS	4h_DINCH_1000nM_ctrlnoLPS	4h_MINCH_10nM_ctrlnoLPS	4h_MINCH_100nM_ctrlnoLPS	4h_MINCH_1000nM_ctrlnoLPS	4h_MINCH_10000nM_ctrlnoLPS	4h_DINCH_10000nM_ctrlnoLPS	4h_ctrlLPS_ctrlnoLPS	4h_DINCH_10nM_ctrlnoLPS	4h_DINCH_100nM_ctrlnoLPS	4h_DINCH_1000nM_ctrlnoLPS	4h_MINCH_10nM_ctrlnoLPS	4h_MINCH_100nM_ctrlnoLPS	4h_MINCH_1000nM_ctrlnoLPS	4h_MINCH_10000nM_ctrlnoLPS	4h_DINCH_10000nM_ctrlnoLPS	4h_ctrlLPS_ctrlnoLPS	4h_DINCH_10nM_ctrlnoLPS	4h_DINCH_100nM_ctrlnoLPS	4h_DINCH_1000nM_ctrlnoLPS	4h_MINCH_10nM_ctrlnoLPS	4h_MINCH_100nM_ctrlnoLPS	4h_MINCH_1000nM_ctrlnoLPS	4h_MINCH_10000nM_ctrlnoLPS	4h_DINCH_10000nM_ctrlnoLPS	16h_ctrlLPS_ctrlnoLPS	16h_DINCH_10nM_ctrlnoLPS	16h_DINCH_100nM_ctrlnoLPS	16h_DINCH_1000nM_ctrlnoLPS	16h_MINCH_10nM_ctrlnoLPS	16h_MINCH_100nM_ctrlnoLPS	16h_MINCH_1000nM_ctrlnoLPS	16h_MINCH_10000nM_ctrlnoLPS	16h_DINCH_10000nM_ctrlnoLPS	16h_ctrlLPS_ctrlnoLPS	16h_DINCH_10nM_ctrlnoLPS	16h_DINCH_100nM_ctrlnoLPS	16h_DINCH_1000nM_ctrlnoLPS
Q9Y490	1.323	1.152	2.152	1.687	0.665	0.505	0.581	1	1.967	2.194	1.225	2.088	1.509	0.726	0.433	1.029	1.89	2.325	1.524	1.211	0.823	1.873	1.283	1.579	0.743	1.333	1.536	1.413	0.771	0.675	1.105	0.787	1.379	1.342	0.884	2.024	1.065	0.679	1.163	1.452	1.097	1.13	0.602	1.754	1.225	1.163	1.067	0.735	1.303
P21333	1.304	1.067	1.937	1.496	0.65	0.484	0.56	0.894	1.739	2.288	1.159	1.905	1.398	0.731	0.433	0.895	1.642	2.114	1.53	1.157	0.817	1.838	1.218	1.526	0.713	1.302	1.429	1.387	0.753	0.667	1.071	0.761	1.331	1.289	0.861	1.926	1.07	0.673	1.15	1.406	1.054	1.134	0.64	1.739	1.191	1.134	1.02	0.761	1.247
P35579	1.309	1.051	2.035	1.589	0.612	0.461	0.53	0.949	1.799	2.221	1.288	2.268	1.562	0.746	0.424	0.992	1.868	2.403	1.593	1.185	0.802	1.883	1.261	1.509	0.698	1.281	1.474	1.383	0.759	0.672	1.071	0.741	1.302	1.242	0.833	1.957	1.072	0.653	1.169	1.436	1.087	1.108	0.634	1.667	1.187	1.159	1.013	0.754	1.24
Q14204	1.333	1.134	2.232	1.739	0.683	0.526	0.561	1.006	2.019	2.16	1.275	2.238	1.561	0.751	0.457	1.056	1.983	2.466	1.522	1.168	0.816	1.837	1.255	1.542	0.733	1.307	1.533	1.335	0.744	0.671	1.06	0.763	1.324	1.286	0.857	1.999	1.049	0.667	1.157	1.405	1.081	1.124	0.649	1.672	1.211	1.161	1.029	0.769	1.281
P78527	1.278	1.081	2.11	1.666	0.648	0.496	0.536	0.967	1.894	1.99	1.247	2.163	1.513	0.678	0.439	0.996	1.903	2.367	1.424	1.173	0.814	1.839	1.256	1.562	0.773	1.354	1.531	1.326	0.74	0.682	1.064	0.751	1.319	1.267	0.869	1.973	1.044	0.668	1.151	1.421	1.079	1.133	0.666	1.676	1.223	1.158	1.033	0.779	1.293
Q09666	1.309	1.118	2.158	1.597	0.663	0.51	0.579	0.997	1.946	2.326	1.322	2.255	1.585	0.815	0.487	1.049	1.898	2.383	1.501	1.156	0.808	1.728	1.263	1.565	0.72	1.315	1.448	1.394	0.788	0.696	1.036	0.781	1.375	1.303	0.882	1.937	1.183	0.768	1.168	1.572	1.122	1.2	0.674	1.76	1.219	1.208	1.099	0.87	1.32
P49327	1.32	1.12	2.155	1.67	0.669	0.526	0.563	0.984	1.947	2.176	1.252	2.128	1.509	0.737	0.458	1.019	1.899	2.357	1.51	1.173	0.816	1.859	1.251	1.566	0.738	1.337	1.52	1.38	0.75	0.681	1.064	0.754	1.337	1.27	0.857	1.98	1.091	0.673	1.181	1.435	1.084	1.152	0.673	1.711	1.226	1.182	1.045	0.788	1.286
A0A087WVQ6	1.296	1.106	2.128	1.714	0.65	0.478	0.536	0.974	1.941	1.987	1.204	2.049	1.431	0.654	0.399	0.981	1.875	2.244	1.504	1.171	0.789	1.849	1.242	1.535	0.72	1.325	1.522	1.342	0.75	0.657	1.052	0.74	1.313	1.271	0.857	1.927	1.077	0.668	1.189	1.453	1.113	1.185	0.68	1.735	1.231	1.162	1.039	0.777	1.249
P46940	1.224	1.045	2.078	1.65	0.614	0.452	0.517	0.92	1.843	2.058	1.213	2.154	1.505	0.695	0.424	0.964	1.842	2.318	1.456	1.118	0.752	1.742	1.178	1.449	0.672	1.21	1.411	1.307	0.708	0.648	1.024	0.708	1.242	1.18	0.789	1.874	1.009	0.637	1.09	1.352	1.015	1.066	0.606	1.578	1.155	1.1	0.972	0.713	1.213
O75369	1.44	1.221	2.395	1.827	0.753	0.588	0.65	1.085	2.194	2.505	1.327	2.26	1.633	0.821	0.49	1.068	2.021	2.541	1.617	1.281	0.921	2	1.341	1.725	0.801	1.486	1.714	1.451	0.821	0.717	1.142	0.837	1.486	1.434	0.997	2.115	1.141	0.745	1.277	1.523	1.185	1.27	0.735	1.93	1.317	1.255	1.147	0.879	1.441
P08238	1.323	1.073	2.08	1.635	0.65	0.503	0.572	0.967	1.868	2.438	1.258	2.074	1.429	0.745	0.45	1.038	1.875	2.204	1.659	1.19	0.789	1.873	1.229	1.517	0.688	1.282	1.438	1.399	0.745	0.653	1.063	0.734	1.304	1.256	0.821	1.922	1.118	0.659	1.178	1.438	1.067	1.161	0.65	1.75	1.201	1.206	1.048	0.785	1.322
P12814	1.269	1.106	2.198	1.74	0.647	0.493	0.538	1.032	1.999	2.208	1.235	2.176	1.5	0.724	0.43	1.033	1.981	2.36	1.5	1.096	0.784	1.828	1.209	1.478	0.673	1.261	1.519	1.289	0.721	0.639	1.009	0.735	1.286	1.215	0.826	1.902	1.023	0.65	1.124	1.424	1.073	1.113	0.637	1.649	1.214	1.098	0.993	0.728	1.259
O43707	1.268	1.074	1.998	1.616	0.632	0.472	0.528	0.976	1.867	2.135	1.208	2.019	1.437	0.692	0.394	0.995	1.866	2.329	1.478	1.128	0.788	1.789	1.228	1.489	0.683	1.288	1.502	1.342	0.739	0.64	1.021	0.736	1.294	1.206	0.817	1.939	1.053	0.676	1.151	1.475	1.109	1.127	0.66	1.72	1.263	1.157	1.03	0.756	1.315
P63261	1.347	1.142	2.044	1.591	0.702	0.542	0.655	0.949	1.916	2.268	1.111	1.872	1.337	0.719	0.442	1.407	1.772	2.08	1.578	1.257	0.842	1.902	1.329	1.591	0.775	1.357	1.479	1.46	0.826	0.699	1.168	0.816	1.388	1.368	0.894	2.038	1.076	0.696	1.163	1.417	1.094	1.107	0.64	1.732	1.172	1.17	1.061	0.751	1.338
P07900	1.329	1.144	2.271	1.807	0.695	0.513	0.553	0.993	2.022	2.326	1.286	2.215	1.542	0.727	0.449	1.02	1.898	2.334	1.61	1.203	0.821	1.914	1.277	1.585	0.731	1.347	1.521	1.378	0.762	0.676	1.077	0.753	1.354	1.299	0.861	1.978	1.069	0.656	1.155	1.419	1.079	1.141	0.645	1.697	1.212	1.161	1.012	0.761	1.285
P14618	1.387	1.201	2.281	1.816	0.722	0.537	0.614	1.012	2.053	2.381	1.287	2.185	1.501	0.736	0.456	1.056	1.963	2.343	1.613	1.29	0.866	2.043	1.373	1.659	0.782	1.376	1.578	1.529	0.827	0.722	1.21	0.831	1.473	1.404	0.951	2.149	1.174	0.737	1.266	1.59	1.198	1.223	0.712	1.811	1.34	1.257	1.124	0.824	1.406
P13796	1.353	1.166	2.167	1.704	0.676	0.501	0.576	1.094	1.924	2.27	1.333	2.234	1.616	0.755	0.472	1.151	2.081	2.419	1.514	1.263	0.831	1.921	1.325	1.622	0.756	1.38	1.579	1.478	0.797	0.693	1.177	0.828	1.439	1.415	0.907	2.099	1.092	0.7	1.195	1.516	1.156	1.181	0.666	1.752	1.314	1.207	1.098	0.772	1.368
P13639	1.339	1.141	2.177	1.727	0.682	0.49	0.565	0.969	1.915	2.284	1.318	2.216	1.542	0.753	0.466	1.019	1.889	2.379	1.595	1.234	0.831	1.925	1.289	1.606	0.733	1.337	1.546	1.444	0.797	0.712	1.144	0.778	1.365	1.301	0.879	2.068	1.157	0.718	1.264	1.549	1.151	1.207	0.683	1.835	1.305	1.234	1.121	0.817	1.357
P10809	1.277	1.114	2.187	1.718	0.652	0.491	0.537	0.956	1.956	2.136	1.177	2.027	1.409	0.67	0.445	0.923	1.843	2.189	1.515	1.156	0.759	1.744	1.204	1.473	0.71	1.261	1.391	1.366	0.721	0.633	1.032	0.729	1.296	1.273	0.854	1.92	1.055	0.657	1.139	1.382	1.051	1.112	0.641	1.746	1.192	1.118	1.016	0.741	1.261
Q01518	1.305	1.114	2.15	1.656	0.672	0.511	0.566	0.935	1.895	2.209	1.228	2.089	1.458	0.718	0.447	1.077	1.757	2.23	1.494	1.191	0.801	1.845	1.247	1.51	0.739	1.292	1.418	1.43	0.791	0.682	1.103	0.791	1.362	1.331	0.889	1.971	1.049	0.679	1.127	1.388	1.049	1.121	0.658	1.669	1.184	1.114	1.007	0.722	1.245
P11717	1.216	1.024	1.913	1.488	0.624	0.488	0.541	0.912	1.776	2.082	1.1	1.842	1.314	0.685	0.396	0.884	1.629	2.037	1.391	1.051	0.754	1.669	1.116	1.409	0.65	1.213	1.352	1.245	0.69	0.612	0.959	0.719	1.265	1.202	0.805	1.794	0.962	0.608	1.063	1.284	0.97	1.062	0.602	1.651	1.094	1.066	0.956	0.719	1.197
P11142	1.257	1.022	2.069	1.625	0.588	0.431	0.514	0.902	1.793	2.141	1.274	2.164	1.582	0.699	0.431	0.956	1.814	2.327	1.523	1.161	0.778	1.84	1.223	1.507	0.682	1.242	1.461	1.383	0.748	0.657	1.058	0.73	1.311	1.256	0.827	1.939	1.089	0.677	1.16	1.418	1.073	1.135	0.642	1.696	1.215	1.152	1.036	0.773	1.252
P68104	1.286	1.08	1.948	1.53	0.66	0.5	0.605	0.859	1.731	2.272	1.127	1.83	1.269	0.672	0.427	0.984	1.677	1.964	1.613	1.174	0.814	1.88	1.23	1.549	0.72	1.309	1.363	1.481	0.794	0.69	1.153	0.798	1.417	1.402	0.94	2.019	1.037	0.631	1.156	1.347	1.036	1.12	0.646	1.734	1.135	1.127	0.996	0.727	1.23
Q92616	1.295	1.115	2.21	1.69	0.674	0.526	0.526	0.987	2.014	1.905	1.196	2.084	1.476	0.631	0.447	0.907	1.825	2.336	1.298	1.167	0.806	1.788	1.305	1.583	0.837	1.388	1.484	1.34	0.78	0.692	1.074	0.798	1.418	1.399	0.944	2.055	1.03	0.683	1.148	1.385	1.077	1.146	0.693	1.621	1.246	1.112	1.038	0.773	1.283
P07814	1.271	1.1	2.206	1.758	0.66	0.494	0.536	0.964	1.994	2.091	1.21	2.126	1.466	0.683	0.402	0.976	1.883	2.269	1.417	1.141	0.793	1.864	1.253	1.532	0.716	1.336	1.534	1.322	0.748	0.649	1.06	0.768	1.358	1.308	0.881	1.985	1.037	0.645	1.14	1.4	1.07	1.107	0.66	1.657	1.222	1.14	0.988	0.734	1.251
P14625	1.341	1.102	2.106	1.671	0.63	0.487	0.559	0.966	1.863	2.238	1.251	2.234	1.548	0.735	0.432	1.006	1.938	2.367	1.589	1.181	0.795	1.874	1.255	1.524	0.705	1.282	1.442	1.419	0.745	0.658	1.073	0.731	1.268	1.205	0.798	1.948	1.091	0.671	1.157	1.44	1.067	1.135	0.643	1.704	1.194	1.156	1.006	0.736	1.268
P42704	1.363	1.18	2.312	1.744	0.697	0.548	0.587	1.043	2.098	1.941	1.232	2.201	1.601	0.683	0.431	1.085	1.923	2.397	1.463	1.224	0.842	1.878	1.308	1.661	0.778	1.389	1.58	1.418	0.801	0.723	1.108	0.807	1.435	1.382	0.9	2.094	1.109	0.723	1.138	1.492	1.071	1.112	0.67	1.696	1.27	1.19	1.096	0.779	1.327
Q15149	1.329	1.109	1.859	1.346	0.693	0.598	0.613	0.824	1.736	2.288	1.108	1.605	1.134	0.698	0.436	0.95	1.455	1.93	1.37	1.002	0.86	1.663	1.087	1.48	0.641	1.177	1.579	0.895	0.686	0.545	0.749	0.545	0.963	1.039	0.654	1.637	1.031	0.992	1.148	1.39	1.028	1.244	0.691	1.767	1.246	1.112	0.951	0.797	1.27
P06733	1.415	1.224	2.436	1.916	0.692	0.52	0.566	1.019	2.111	2.255	1.428	2.56	1.713	0.778	0.51	1.05	2.033	2.666	1.623	1.289	0.843	1.924	1.349	1.585	0.777	1.343	1.515	1.543	0.825	0.732	1.157	0.79	1.392	1.347	0.906	2.096	1.165	0.734	1.252	1.514	1.142	1.195	0.697	1.74	1.299	1.242	1.123	0.825	1.344
P38646	1.217	1.007	1.847	1.481	0.593	0.457	0.532	0.94	1.719	2.115	1.169	1.964	1.4	0.702	0.392	0.954	1.787	2.162	1.418	1.139	0.778	1.741	1.206	1.481	0.687	1.214	1.492	1.3	0.719	0.624	1.025	0.746	1.306	1.252	0.82	1.863	1.003	0.652	1.106	1.369	1.023	1.05	0.574	1.656	1.162	1.131	1.005	0.741	1.263
Q9Y4L1	1.252	1.069	2.115	1.634	0.636	0.489	0.54	0.936	1.894	1.956	1.163	2.067	1.463	0.665	0.398	0.966	1.75	2.248	1.406	1.123	0.766	1.725	1.191	1.457	0.681	1.215	1.442	1.307	0.716	0.639	1.039	0.714	1.257	1.225	0.785	1.906	1.009	0.644	1.103	1.352	1.018	1.048	0.599	1.619	1.154	1.109	0.999	0.717	1.215
P11021	1.234	1.066	2.056	1.632	0.604	0.44	0.51	0.98	1.849	2.09	1.256	2.194	1.521	0.682	0.4	1.031	1.95	2.342	1.381	1.139	0.761	1.768	1.214	1.478	0.683	1.241	1.478	1.351	0.733	0.656	1.079	0.765	1.352	1.301	0.85	1.932	1.024	0.652	1.117	1.382	1.064	1.087	0.631	1.606	1.19	1.106	0.995	0.734	1.239
P34932	1.273	1.094	2.14	1.674	0.645	0.477	0.539	0.968	1.941	2.157	1.263	2.222	1.537	0.714	0.435	1.03	1.973	2.398	1.528	1.168	0.785	1.848	1.257	1.56	0.679	1.243	1.52	1.356	0.734	0.643	1.062	0.732	1.281	1.235	0.8	1.974	1.044	0.676	1.14	1.422	1.057	1.083	0.609	1.666	1.213	1.145	1.023	0.76	1.28
P04406	1.414	1.233	2.333	1.859	0.74	0.527	0.623	0.963	2.094	2.38	1.331	2.255	1.567	0.78	0.478	1.103	1.951	2.439	1.634	1.318	0.87	2.008	1.381	1.662	0.768	1.367	1.523	1.547	0.828	0.72	1.184	0.827	1.41	1.383	0.927	2.114	1.171	0.736	1.263	1.545	1.171	1.218	0.691	1.854	1.296	1.211	1.117	0.806	1.365
P07437	1.346	1.193	2.325	1.851	0.709	0.531	0.578	1.029	2.106	2.161	1.311	2.253	1.578	0.701	0.423	1.147	2.12	2.485	1.488	1.221	0.837	1.968	1.328	1.634	0.79	1.411	1.556	1.428	0.812	0.704	1.145	0.821	1.435	1.408	0.943	2.054	1.073	0.66	1.206	1.499	1.156	1.183	0.705	1.751	1.277	1.2	1.059	0.779	1.339
P13010	1.183	1.009	1.892	1.482	0.594	0.451	0.507	0.841	1.667	2.022	1.135	1.988	1.35	0.689	0.412	0.892	1.602	2.089	1.448	1.134	0.751	1.749	1.172	1.383	0.659	1.15	1.304	1.246	0.687	0.62	0.986	0.663	1.158	1.128	0.752	1.797	1.018	0.629	1.056	1.35	0.985	1.033	0.589	1.573	1.084	1.105	1.007	0.732	1.212
P53621	1.274	1.078	2.093	1.64	0.645	0.479	0.523	0.949	1.877	1.995	1.208	2.011	1.42	0.703	0.42	0.922	1.69	2.209	1.496	1.182	0.797	1.839	1.244	1.52	0.754	1.334	1.487	1.358	0.751	0.684	1.061	0.754	1.298	1.284	0.874	1.949	1.045	0.654	1.13	1.389	1.069	1.102	0.651	1.633	1.19	1.165	1.035	0.764	1.261
Q96BY6	1.348	1.12	2.112	1.647	0.678	0.533	0.587	0.975	1.937	2.28	1.23	2.089	1.522	0.778	0.487	0.972	1.76	2.378	1.574	1.217	0.875	1.945	1.283	1.629	0.792	1.431	1.574	1.399	0.776	0.727	1.077	0.784	1.384	1.346	0.909	2.039	1.095	0.689	1.193	1.413	1.095	1.209	0.699	1.794	1.234	1.151	1.052	0.795	1.305
Q71U36	1.281	1.072	1.938	1.54	0.635	0.457	0.556	0.819	1.667	2.271	1.243	2.048	1.447	0.745	0.454	0.898	1.602	2.171	1.569	1.194	0.789	1.761	1.226	1.458	0.701	1.179	1.288	1.391	0.759	0.673	1.052	0.735	1.246	1.186	0.79	1.879	1.051	0.674	1.128	1.349	1.022	1.051	0.61	1.571	1.109	1.153	1.033	0.761	1.22
P53396	1.253	1.088	2.087	1.66	0.632	0.473	0.524	0.946	1.847	2.11	1.242	2.138	1.493	0.698	0.442	1.011	1.864	2.317	1.533	1.187	0.809	1.886	1.248	1.549	0.719	1.285	1.539	1.357	0.742	0.671	1.071	0.743	1.293	1.243	0.826	1.982	1.056	0.676	1.171	1.424	1.076	1.132	0.653	1.702	1.218	1.148	1.018	0.754	1.261
P06576	1.295	1.122	2.16	1.714	0.658	0.475	0.549	0.948	1.946	2.108	1.259	2.153	1.498	0.705	0.465	1.021	1.906	2.331	1.495	1.222	0.792	1.872	1.277	1.559	0.767	1.341	1.461	1.405	0.765	0.685	1.082	0.76	1.332	1.314	0.865	1.999	1.055	0.67	1.146	1.392	1.066	1.087	0.644	1.641	1.185	1.132	1.038	0.756	1.254
P06396	1.483	1.211	2.35	1.828	0.728	0.568	0.628	1.168	2.118	2.532	1.397	2.362	1.578	0.82	0.499	1.117	2.126	2.556	1.826	1.39	0.964	2.215	1.469	1.771	0.841	1.565	1.733	1.604	0.896	0.794	1.248	0.868	1.527	1.472	0.984	2.276	1.261	0.796	1.363	1.651	1.269	1.343	0.748	2.019	1.392	1.393	1.21	0.938	1.563
P68371	1.315	1.188	2.52	2.035	0.658	0.432	0.529	0.984	2.078	2.139	1.338	2.424	1.61	0.672	0.383	1.071	2.083	2.481	1.478	1.248	0.814	1.877	1.332	1.639	0.756	1.354	1.501	1.469	0.799	0.721	1.209	0.824	1.397	1.319	0.898	2.144	1.006	0.644	1.087	1.421	1.033	0.998	0.582	1.548	1.171	1.167	1.017	0.749	1.215
D3DSM0	1.298	1.189	1.801	1.516	0.68	0.452	0.518	0.878	1.482	2.091	1.08	1.529	1.218	0.644	0.386	1.007	1.546	1.774	1.656	1.11	0.729	1.683	1.181	1.247	0.624	1.117	1.052	1.459	0.799	0.657	1.079	0.88	1.266	1.362	0.886	1.838	1.13	0.762	1.224	1.508	1.277	1.163	0.748	1.583	1.205	1.217	1.142	0.794	1.347
P07237	1.281	1.105	2.071	1.65	0.646	0.474	0.538	0.941	1.834	2.165	1.24	2.102	1.464	0.727	0.455	0.949	1.784	2.24	1.599	1.212	0.785	1.79	1.24	1.477	0.692	1.205	1.385	1.469	0.779	0.664	1.102	0.774	1.337	1.296	0.846	2.013	1.081	0.674	1.152	1.415	1.044	1.08	0.613	1.657	1.19	1.151	1.041	0.755	1.272
O75643	1.317	1.096	2.221	1.74	0.664	0.5	0.522	0.968	1.992	1.962	1.258	2.214	1.551	0.655	0.417	0.969	1.86	2.445	1.443	1.158	0.794	1.811	1.221	1.48	0.755	1.28	1.482	1.338	0.747	0.643	1.057	0.722	1.237	1.204	0.827	1.936	1.077	0.67	1.171	1.465	1.099	1.144	0.694	1.676	1.214	1.195	1.072	0.8	1.292
P05107	1.253	1.051	1.958	1.531	0.603	0.46	0.538	0.968	1.785	2.154	1.228	2.009	1.484	0.713	0.411	1.016	1.789	2.221	1.466	1.166	0.772	1.746	1.235	1.496	0.695	1.276	1.448	1.371	0.732	0.646	1.074	0.762	1.317	1.28	0.854	1.965	1.097	0.693	1.184	1.492	1.112	1.134	0.617	1.729	1.223	1.241	1.118	0.801	1.396
P18206	1.284	1.126	2.101	1.611	0.674	0.519	0.59	0.997	1.938	2.049	1.211	2.081	1.511	0.734	0.435	0.987	1.866	2.309	1.377	1.125	0.785	1.689	1.212	1.493	0.703	1.26	1.522	1.343	0.74	0.654	1.041	0.747	1.281	1.252	0.825	1.956	1.017	0.666	1.112	1.357	1.045	1.09	0.606	1.627	1.182	1.124	1.03	0.736	1.258
P26640	1.364	1.163	2.287	1.795	0.706	0.526	0.559	1.04	2.099	2.312	1.274	2.139	1.551	0.773	0.478	1.067	1.955	2.407	1.551	1.232	0.853	1.946	1.324	1.664	0.761	1.425	1.65	1.381	0.796	0.699	1.146	0.814	1.468	1.397	0.931	2.111	1.1	0.678	1.229	1.574	1.172	1.233	0.717	1.872	1.335	1.187	1.065	0.8	1.348
P55072	1.282	1.123	2.277	1.81	0.656	0.484	0.54	0.969	2.035	2.054	1.296	2.336	1.644	0.716	0.436	1.018	1.931	2.552	1.513	1.152	0.786	1.791	1.248	1.497	0.705	1.241	1.462	1.33	0.749	0.676	1.073	0.744	1.311	1.243	0.843	1.975	1.038	0.662	1.133	1.427	1.068	1.089	0.637	1.625	1.231	1.133	1.019	0.742	1.247
P33176	1.28	1.103	2.102	1.619	0.664	0.546	0.58	1.019	1.94	2.339	1.172	1.885	1.323	0.759	0.426	1.023	1.792	2.123	1.605	1.15	0.84	1.926	1.249	1.591	0.7	1.387	1.6	1.369	0.771	0.685	1.116	0.772	1.411	1.359	0.901	2.06	1.079	0.674	1.246	1.503	1.157	1.254	0.712	1.891	1.291	1.215	1.063	0.802	1.387
Q92598	1.32	1.15	2.221	1.744	0.699	0.551	0.591	1.006	2.017	2.168	1.241	2.216	1.567	0.754	0.445	1.051	1.983	2.443	1.472	1.18	0.81	1.912	1.299	1.605	0.746	1.386	1.561	1.395	0.771	0.677	1.117	0.813	1.385	1.373	0.919	2.084	1.062	0.678	1.164	1.452	1.094	1.152	0.648	1.708	1.248	1.169	1.07	0.774	1.329
P09874	1.338	1.075	2.098	1.616	0.643	0.483	0.537	0.881	1.878	2.152	1.287	2.168	1.482	0.68	0.415	0.904	1.79	2.424	1.588	1.136	0.774	1.799	1.161	1.517	0.715	1.264	1.471	1.393	0.729	0.651	1.064	0.727	1.242	1.239	0.825	1.948	1.103	0.66	1.173	1.412	1.056	1.176	0.666	1.761	1.276	1.154	0.992	0.773	1.33
P27797	1.247	1.037	1.914	1.489	0.618	0.495	0.539	1.111	1.783	2.271	1.256	2.121	1.512	0.732	0.436	1.041	2.064	2.305	1.635	1.178	0.844	1.978	1.278	1.612	0.71	1.329	1.716	1.431	0.782	0.675	1.131	0.789	1.444	1.373	0.905	2.064	1.1	0.668	1.188	1.5	1.114	1.218	0.669	1.815	1.253	1.231	1.045	0.798	1.383
P78371	1.251	1.073	1.963	1.529	0.64	0.463	0.528	0.871	1.697	2.076	1.198	2.016	1.463	0.718	0.42	0.975	1.675	2.207	1.416	1.166	0.786	1.745	1.245	1.453	0.716	1.228	1.322	1.398	0.756	0.666	1.092	0.765	1.312	1.271	0.839	1.957	1.051	0.673	1.149	1.398	1.083	1.069	0.621	1.62	1.16	1.132	1.04	0.728	1.243
Q6P2Q9	1.313	1.083	2.24	1.712	0.661	0.509	0.526	0.983	2.027	1.977	1.289	2.287	1.563	0.689	0.456	1.013	1.955	2.523	1.334	1.182	0.791	1.78	1.249	1.549	0.793	1.377	1.541	1.3	0.743	0.681	1.066	0.765	1.358	1.319	0.896	1.995	1.07	0.676	1.177	1.413	1.079	1.2	0.716	1.742	1.237	1.211	1.098	0.799	1.319
Q9BSJ8	1.321	1.16	2.291	1.788	0.671	0.519	0.56	1.042	2.035	2.121	1.364	2.405	1.699	0.737	0.457	1.134	2.044	2.604	1.488	1.195	0.845	1.828	1.315	1.621	0.77	1.412	1.498	1.401	0.782	0.701	1.114	0.805	1.388	1.342	0.902	2.067	1.047	0.664	1.15	1.451	1.076	1.151	0.679	1.668	1.231	1.113	0.984	0.748	1.232
P31939	1.337	1.175	2.293	1.81	0.697	0.536	0.582	1.028	2.108	2.091	1.279	2.178	1.523	0.723	0.448	1.026	1.904	2.441	1.512	1.219	0.828	1.938	1.298	1.588	0.767	1.387	1.546	1.429	0.792	0.694	1.146	0.801	1.406	1.365	0.904	2.11	1.072	0.655	1.175	1.417	1.101	1.128	0.671	1.718	1.216	1.159	1.061	0.756	1.306
Q9P2E9	1.446	1.087	2.115	1.69	0.691	0.557	0.597	0.941	1.981	2.591	1.209	2.096	1.511	0.83	0.462	0.961	1.743	2.518	1.677	1.168	0.831	1.918	1.23	1.532	0.71	1.341	1.639	1.385	0.756	0.667	1.122	0.818	1.361	1.375	0.915	2.02	1.105	0.67	1.213	1.48	1.122	1.211	0.644	1.851	1.241	1.216	1.076	0.795	1.342
P26038	1.32	1.133	2.252	1.776	0.65	0.497	0.568	1.065	2.039	2.256	1.292	2.268	1.559	0.718	0.433	1.055	2.041	2.425	1.555	1.192	0.817	1.962	1.332	1.614	0.718	1.327	1.635	1.399	0.768	0.677	1.121	0.78	1.369	1.326	0.883	2.02	1.098	0.67	1.176	1.508	1.106	1.129	0.651	1.77	1.26	1.179	1.023	0.761	1.302
P12956	1.173	0.96	1.806	1.417	0.554	0.42	0.48	0.835	1.567	2.035	1.177	2.066	1.422	0.693	0.428	0.867	1.643	2.139	1.458	1.149	0.784	1.804	1.199	1.433	0.691	1.233	1.364	1.25	0.719	0.649	0.985	0.707	1.221	1.197	0.805	1.823	1.02	0.629	1.076	1.326	1.004	1.056	0.605	1.551	1.071	1.108	0.998	0.713	1.214
P15311	1.29	1.085	2.16	1.679	0.625	0.47	0.526	0.957	1.889	2.248	1.275	2.238	1.501	0.708	0.435	1.008	1.97	2.33	1.595	1.161	0.771	1.818	1.225	1.475	0.679	1.227	1.471	1.389	0.757	0.664	1.07	0.744	1.278	1.253	0.828	1.944	1.065	0.632	1.158	1.434	1.048	1.091	0.62	1.669	1.195	1.137	0.996	0.745	1.261
P50395	1.279	1.074	2.05	1.633	0.627	0.462	0.542	0.955	1.816	2.185	1.276	2.228	1.537	0.731	0.435	1.036	1.889	2.346	1.516	1.179	0.785	1.817	1.25	1.485	0.711	1.26	1.46	1.362	0.735	0.669	1.063	0.712	1.26	1.203	0.806	1.924	1.046	0.662	1.108	1.4	1.05	1.067	0.626	1.609	1.204	1.142	1.029	0.754	1.271
Q13200	1.292	1.099	2.134	1.682	0.663	0.492	0.543	0.977	1.971	2.129	1.243	2.119	1.51	0.74	0.432	0.982	1.853	2.368	1.456	1.152	0.813	1.884	1.268	1.571	0.728	1.334	1.532	1.321	0.747	0.656	1.043	0.772	1.351	1.288	0.878	1.953	1.037	0.646	1.135	1.41	1.068	1.136	0.66	1.71	1.205	1.133	1.009	0.733	1.276
Q14697	1.35	1.12	2.263	1.745	0.68	0.543	0.614	1.079	2.032	2.357	1.263	2.203	1.489	0.767	0.49	1.047	1.92	2.378	1.634	1.216	0.863	2.054	1.304	1.668	0.763	1.415	1.674	1.424	0.784	0.707	1.14	0.788	1.435	1.376	0.914	2.082	1.135	0.703	1.262	1.583	1.18	1.27	0.708	1.876	1.33	1.238	1.076	0.802	1.375
F5H5D3	1.375	1.339	2.41	2.097	0.813	0.509	0.509	1.184	2.317	2.448	1.268	1.972	1.529	0.696	0.361	1.171	2.041	2.191	1.215	1.327	0.908	1.965	1.532	1.655	1.113	1.528	1.842	1.483	0.855	0.734	1.165	0.919	1.361	1.447	0.96	1.703	1.055	0.571	1.209	1.432	1.181	1.015	0.814	1.354	1.068	1.332	1.073	0.861	1.475
P00558	1.373	1.212	2.264	1.738	0.693	0.504	0.559	1.026	1.918	2.278	1.332	2.346	1.62	0.785	0.479	1.027	1.963	2.443	1.539	1.294	0.874	1.919	1.44	1.694	0.774	1.391	1.663	1.489	0.823	0.71	1.161	0.818	1.374	1.316	0.909	2.077	1.174	0.798	1.273	1.61	1.202	1.204	0.68	1.757	1.346	1.263	1.168	0.835	1.425
P48643	1.262	1.07	2.081	1.649	0.612	0.437	0.493	0.92	1.802	2.054	1.213	2.149	1.475	0.688	0.419	0.958	1.807	2.289	1.449	1.169	0.78	1.792	1.234	1.487	0.694	1.216	1.463	1.333	0.74	0.661	1.041	0.725	1.258	1.201	0.813	1.903	1.02	0.659	1.104	1.324	1.015	1.038	0.611	1.568	1.141	1.142	1.037	0.761	1.275
H3BR70	1.398	1.222	2.323	1.876	0.807	0.638	0.532	1.331	2.249	1.801	1.609	2.539	1.75	0.719	0.566	0.953	1.879	2.906	1.893	1.191	0.738	1.762	1.2	1.418	0.62	1.133	1.335	1.502	0.754	0.665	1.238	0.751	1.262	1.253	0.875	2.092	0.955	0.576	1.066	1.31	1.034	0.952	0.634	1.417	1.168	1.089	1.238	0.917	1.331
H0YFD6	1.353	1.167	2.342	1.864	0.69	0.51	0.574	1.035	2.138	2.235	1.315	2.317	1.615	0.774	0.472	0.992	1.879	2.538	1.505	1.231	0.818	1.872	1.293	1.581	0.766	1.357	1.538	1.396	0.769	0.688	1.091	0.776	1.376	1.302	0.884	2.091	1.055	0.71	1.184	1.44	1.092	1.146	0.665	1.728	1.273	1.155	1.052	0.78	1.286
P53618	1.281	1.084	2.172	1.72	0.672	0.487	0.506	0.972	1.941	1.875	1.22	2.166	1.567	0.659	0.434	1.027	1.996	2.418	1.454	1.149	0.802	1.847	1.254	1.539	0.724	1.317	1.502	1.317	0.743	0.68	1.062	0.75	1.329	1.276	0.861	1.972	1.062	0.672	1.175	1.47	1.09	1.119	0.67	1.644	1.237	1.156	1.056	0.765	1.306
Q04637	1.355	1.129	2.125	1.672	0.678	0.53	0.592	1.034	1.94	2.399	1.27	2.11	1.525	0.788	0.464	1.043	1.9	2.363	1.571	1.185	0.816	1.877	1.274	1.559	0.724	1.333	1.549	1.409	0.773	0.687	1.129	0.805	1.404	1.372	0.923	2.078	1.069	0.692	1.161	1.482	1.109	1.174	0.618	1.827	1.253	1.177	1.044	0.774	1.361
P08670	1.309	1.361	1.952	1.27	0.588	0.478	0.479	0.712	1.544	2.278	1.592	2.008	1.457	0.565	0.346	0.968	1.512	2.203	1.603	1.062	0.976	1.578	0.879	1.89	0.559	0.918	1.948	1.423	0.852	0.776	1.041	0.545	1.28	1.03	0.733	2.087	1.017	1.658	0.963	1.302	0.906	0.938	0.515	1.48	1.187	1.103	0.71	0.838	1.18
Q14152	1.321	1.096	2.153	1.67	0.67	0.526	0.583	1.01	1.961	2.077	1.26	2.145	1.512	0.711	0.444	1.046	1.978	2.385	1.474	1.184	0.847	1.935	1.309	1.645	0.782	1.423	1.597	1.356	0.775	0.697	1.117	0.777	1.407	1.351	0.909	2.078	1.109	0.7	1.246	1.551	1.18	1.245	0.734	1.844	1.353	1.178	1.076	0.791	1.341
P04075	1.408	1.217	2.295	1.753	0.728	0.56	0.633	1.075	1.952	2.545	1.307	2.162	1.546	0.814	0.513	1.162	1.915	2.19	1.795	1.29	0.895	1.927	1.357	1.625	0.747	1.394	1.509	1.555	0.861	0.724	1.147	0.859	1.488	1.453	0.949	2.087	1.294	0.813	1.329	1.687	1.278	1.351	0.721	2.165	1.341	1.333	1.225	0.86	1.514
P52272	1.267	1.084	2.285	1.782	0.629	0.461	0.55	0.991	2.066	2.108	1.273	2.337	1.571	0.699	0.435	1.106	2.031	2.467	1.526	1.17	0.804	1.957	1.262	1.642	0.676	1.304	1.759	1.317	0.727	0.666	1.058	0.711	1.306	1.21	0.817	2.006	1.02	0.637	1.096	1.445	1.025	1.031	0.592	1.652	1.226	1.093	0.993	0.729	1.225
O14980	1.295	1.074	2.002	1.544	0.608	0.472	0.538	0.951	1.741	2.088	1.231	2.12	1.502	0.703	0.455	0.985	1.848	2.26	1.49	1.205	0.8	1.822	1.264	1.555	0.741	1.303	1.509	1.372	0.76	0.681	1.09	0.764	1.304	1.27	0.838	1.936	1.113	0.712	1.121	1.485	1.086	1.08	0.624	1.62	1.265	1.173	1.067	0.737	1.287
P49588	1.139	0.988	1.928	1.519	0.575	0.428	0.472	0.868	1.712	1.921	1.138	2.002	1.393	0.664	0.405	0.894	1.67	2.125	1.322	1.035	0.707	1.585	1.089	1.335	0.606	1.067	1.285	1.246	0.667	0.583	0.958	0.689	1.168	1.134	0.753	1.771	0.923	0.594	1.017	1.21	0.9	0.953	0.53	1.512	1.025	1.028	0.963	0.699	1.186
Q7KZF4	1.261	1.057	2.069	1.575	0.632	0.493	0.543	0.968	1.858	2.147	1.185	2.085	1.435	0.714	0.41	0.955	1.794	2.273	1.497	1.116	0.777	1.76	1.175	1.437	0.675	1.246	1.48	1.285	0.72	0.644	1.014	0.72	1.26	1.225	0.811	1.886	1.037	0.628	1.153	1.387	1.062	1.131	0.659	1.725	1.179	1.137	1.03	0.76	1.259
P22314	1.359	1.141	2.161	1.714	0.707	0.529	0.58	1.035	1.978	2.186	1.283	2.141	1.535	0.745	0.484	1.077	1.894	2.403	1.501	1.192	0.839	1.847	1.299	1.576	0.771	1.403	1.44	1.4	0.796	0.707	1.111	0.785	1.395	1.372	0.913	2.049	1.105	0.679	1.196	1.447	1.109	1.16	0.678	1.732	1.246	1.162	1.076	0.814	1.34
P68366	1.297	1.142	2.221	1.672	0.662	0.522	0.613	0.936	1.985	2.303	1.374	2.401	1.638	0.771	0.492	1.218	1.961	2.622	1.762	1.237	0.833	1.875	1.294	1.567	0.799	1.271	1.47	1.454	0.809	0.766	1.133	0.779	1.37	1.305	0.892	2.162	1.112	0.677	1.225	1.469	1.083	1.144	0.676	1.667	1.285	1.162	1.048	0.784	1.231
O75083	1.351	1.178	2.221	1.763	0.7	0.499	0.568	0.945	1.938	2.428	1.294	2.172	1.543	0.77	0.449	1.004	1.818	2.352	1.623	1.214	0.854	1.969	1.273	1.562	0.727	1.366	1.442	1.454	0.793	0.698	1.142	0.79	1.358	1.313	0.867	2.047	1.11	0.689	1.198	1.453	1.105	1.192	0.683	1.779	1.226	1.195	1.062	0.806	1.335
Q13813	1.233	1.04	1.933	1.498	0.64	0.519	0.559	0.939	1.822	2.091	1.124	1.733	1.252	0.655	0.416	0.899	1.637	2.052	1.31	1.025	0.738	1.599	1.088	1.369	0.677	1.204	1.39	1.259	0.689	0.613	0.959	0.699	1.258	1.322	0.82	1.95	0.974	0.625	1.108	1.325	1.02	1.162	0.65	1.743	1.183	1.084	0.982	0.734	1.244
Q9Y678	1.303	1.115	2.176	1.734	0.684	0.541	0.584	0.959	1.987	2.067	1.185	2.06	1.461	0.712	0.461	0.972	1.756	2.303	1.477	1.171	0.818	1.821	1.235	1.537	0.757	1.29	1.49	1.312	0.737	0.656	1.049	0.737	1.346	1.286	0.875	1.947	1.034	0.636	1.148	1.379	1.045	1.149	0.672	1.734	1.19	1.122	1.016	0.754	1.281
P05023	1.304	1.133	2.16	1.703	0.675	0.532	0.574	1.009	2.013	2.094	1.223	2.065	1.498	0.719	0.45	1.002	1.839	2.307	1.522	1.163	0.818	1.837	1.256	1.595	0.714	1.342	1.599	1.318	0.752	0.685	1.062	0.774	1.412	1.33	0.912	2.023	1.056	0.683	1.201	1.463	1.128	1.233	0.679	1.855	1.289	1.172	1.056	0.791	1.29
Q86UX7	1.346	1.145	2.275	1.836	0.67	0.492	0.531	1.034	2.043	2.115	1.307	2.248	1.557	0.694	0.429	1.061	2.049	2.395	1.588	1.192	0.796	1.829	1.265	1.485	0.702	1.274	1.452	1.383	0.764	0.698	1.086	0.762	1.301	1.248	0.854	1.967	1.098	0.69	1.209	1.512	1.146	1.166	0.676	1.69	1.259	1.2	1.057	0.798	1.305
P29401	1.276	1.066	1.99	1.565	0.635	0.472	0.537	0.875	1.784	2.162	1.193	1.963	1.364	0.691	0.424	0.861	1.661	2.087	1.506	1.12	0.791	1.777	1.149	1.417	0.654	1.201	1.322	1.374	0.75	0.664	1.059	0.72	1.316	1.245	0.825	1.91	1.064	0.671	1.133	1.391	1.042	1.122	0.64	1.713	1.186	1.111	1.009	0.723	1.254
P50990	1.277	1.063	2.064	1.614	0.63	0.463	0.538	0.87	1.786	2.14	1.199	2.053	1.393	0.697	0.41	0.926	1.636	2.189	1.514	1.167	0.776	1.761	1.216	1.444	0.667	1.197	1.353	1.346	0.73	0.647	1.032	0.712	1.223	1.175	0.773	1.876	1.038	0.682	1.128	1.381	1.03	1.063	0.616	1.645	1.153	1.135	1.019	0.755	1.227
Q6ZS81	1.425	1.202	2.329	1.814	0.752	0.596	0.615	1.084	2.226	2.267	1.298	2.215	1.593	0.799	0.504	1.096	1.964	2.552	1.533	1.231	0.88	1.979	1.351	1.706	0.833	1.502	1.606	1.453	0.807	0.745	1.151	0.809	1.438	1.384	0.972	2.161	1.041	0.691	1.172	1.439	1.107	1.204	0.676	1.736	1.276	1.168	1.034	0.783	1.307
P29350	1.404	1.183	2.379	1.878	0.693	0.536	0.569	1.098	2.093	2.471	1.346	2.382	1.656	0.804	0.459	1.174	2.123	2.571	1.645	1.231	0.873	2.014	1.329	1.623	0.763	1.467	1.608	1.45	0.808	0.717	1.17	0.822	1.44	1.389	0.938	2.101	1.16	0.718	1.29	1.614	1.221	1.279	0.724	1.919	1.33	1.269	1.093	0.829	1.409
P50991	1.307	1.107	2.118	1.653	0.639	0.489	0.569	0.933	1.867	2.075	1.191	2.048	1.451	0.709	0.436	0.988	1.731	2.267	1.598	1.182	0.822	1.843	1.25	1.535	0.708	1.278	1.489	1.332	0.735	0.645	1.044	0.721	1.284	1.238	0.823	1.865	1.026	0.648	1.112	1.377	1.075	1.089	0.62	1.69	1.183	1.16	1.059	0.764	1.309
P02545	1.264	0.968	1.947	1.535	0.605	0.476	0.544	0.838	1.709	2.132	1.05	2.005	1.45	0.603	0.398	0.989	1.678	2.077	1.495	1.062	0.722	1.925	1.137	1.417	0.727	1.208	1.508	1.331	0.698	0.599	1.169	0.686	1.161	1.266	0.822	1.759	1.136	0.525	0.965	1.388	0.894	1.158	0.587	1.661	1.201	1.255	0.877	0.674	1.251
Q9NYU2	1.334	1.171	2.169	1.728	0.691	0.533	0.568	0.994	1.952	2.127	1.273	2.107	1.496	0.747	0.448	0.99	1.833	2.362	1.555	1.204	0.812	1.848	1.247	1.548	0.735	1.303	1.518	1.348	0.763	0.698	1.09	0.776	1.311	1.303	0.876	2.007	1.07	0.697	1.204	1.453	1.123	1.178	0.673	1.791	1.285	1.178	1.051	0.802	1.322
P30101	1.285	1.125	2.093	1.673	0.653	0.509	0.55	0.999	1.882	2.043	1.192	2.051	1.493	0.676	0.399	1.015	1.832	2.255	1.468	1.166	0.792	1.78	1.241	1.484	0.706	1.272	1.467	1.352	0.757	0.66	1.047	0.763	1.317	1.246	0.838	1.902	1.073	0.681	1.177	1.432	1.093	1.143	0.65	1.722	1.215	1.174	1.043	0.774	1.318
Q86VP6	1.335	1.124	2.108	1.669	0.688	0.516	0.544	0.921	1.889	2.162	1.22	2.021	1.456	0.711	0.454	0.903	1.762	2.243	1.441	1.192	0.823	1.804	1.274	1.519	0.783	1.309	1.444	1.377	0.753	0.686	1.075	0.776	1.332	1.321	0.88	1.992	1.062	0.677	1.149	1.419	1.103	1.127	0.672	1.703	1.204	1.161	1.084	0.752	1.27
Q7L576	1.288	1.128	2.187	1.712	0.662	0.527	0.529	1.014	2.005	1.805	1.278	2.189	1.55	0.661	0.44	1.054	1.976	2.453	1.323	1.151	0.787	1.843	1.276	1.605	0.773	1.412	1.547	1.29	0.749	0.679	1.049	0.761	1.363	1.316	0.912	1.966	1.032	0.675	1.16	1.412	1.096	1.143	0.69	1.664	1.238	1.099	1.029	0.766	1.262
O00410	1.304	1.187	2.312	1.707	0.702	0.547	0.6	1.046	2.047	2.055	1.175	2.03	1.466	0.704	0.444	1	1.776	2.221	1.436	1.19	0.801	1.757	1.271	1.563	0.743	1.316	1.463	1.406	0.75	0.676	1.075	0.784	1.373	1.347	0.845	1.977	1.043	0.662	1.137	1.476	1.071	1.07	0.638	1.633	1.204	1.169	1.077	0.771	1.322
Q08211	1.278	1.035	2.039	1.578	0.644	0.498	0.52	0.962	1.861	2.013	1.151	1.988	1.359	0.656	0.408	0.939	1.744	2.201	1.448	1.142	0.797	1.795	1.206	1.549	0.718	1.308	1.474	1.284	0.735	0.651	1.004	0.712	1.277	1.231	0.845	1.875	1.112	0.707	1.247	1.465	1.127	1.19	0.707	1.796	1.232	1.194	1.103	0.84	1.361
O60610	1.409	1.174	2.442	1.897	0.71	0.553	0.586	1.098	2.227	2.227	1.362	2.511	1.742	0.789	0.469	1.123	2.183	2.735	1.615	1.213	0.866	1.968	1.338	1.659	0.757	1.416	1.691	1.376	0.78	0.698	1.119	0.801	1.421	1.367	0.921	2.099	1.131	0.692	1.231	1.509	1.136	1.189	0.689	1.794	1.312	1.231	1.068	0.809	1.388
Q8NF50	1.355	1.127	2.23	1.716	0.658	0.512	0.517	1.008	1.995	2.08	1.292	2.267	1.593	0.712	0.444	1.038	1.991	2.495	1.516	1.171	0.814	1.785	1.225	1.529	0.728	1.32	1.537	1.314	0.735	0.663	1.018	0.748	1.301	1.232	0.844	1.938	1.04	0.677	1.157	1.406	1.083	1.156	0.675	1.717	1.225	1.182	1.052	0.799	1.284
P23141	1.371	1.211	2.291	1.813	0.69	0.498	0.586	1.013	2.042	2.244	1.378	2.438	1.756	0.772	0.446	1.079	2.034	2.64	1.497	1.228	0.813	1.889	1.328	1.595	0.745	1.285	1.536	1.502	0.804	0.701	1.187	0.834	1.43	1.391	0.908	2.164	1.125	0.693	1.202	1.564	1.12	1.131	0.63	1.718	1.317	1.196	1.092	0.744	1.364
P25705	1.299	1.105	2.148	1.711	0.621	0.454	0.524	0.945	1.909	2.123	1.263	2.223	1.532	0.703	0.427	1.004	1.835	2.333	1.484	1.184	0.793	1.812	1.255	1.471	0.745	1.275	1.48	1.372	0.741	0.66	1.073	0.742	1.269	1.242	0.807	1.915	1.085	0.663	1.153	1.422	1.084	1.123	0.64	1.649	1.198	1.16	1.016	0.758	1.235
Q99832	1.267	1.053	2.011	1.57	0.614	0.444	0.515	0.897	1.777	2.022	1.195	2.028	1.432	0.686	0.421	0.888	1.645	2.197	1.436	1.168	0.769	1.746	1.2	1.47	0.698	1.218	1.394	1.362	0.745	0.664	1.044	0.729	1.288	1.233	0.827	1.955	1.048	0.695	1.16	1.403	1.053	1.128	0.644	1.715	1.182	1.13	1.053	0.768	1.265
P22102	1.336	1.157	2.246	1.778	0.7	0.52	0.563	1.014	2.053	2.156	1.269	2.187	1.56	0.701	0.437	1.007	1.967	2.386	1.574	1.213	0.838	1.938	1.279	1.556	0.75	1.32	1.484	1.406	0.777	0.704	1.113	0.796	1.376	1.337	0.877	2.044	1.124	0.718	1.218	1.481	1.146	1.203	0.722	1.779	1.29	1.194	1.082	0.801	1.327
Q13885										2.299	1.494	2.68	1.836	0.887	0.5	1.051	2.009	3.286	1.602	1.149	0.809	1.76	1.428	1.309	0.814	1.268	1.371																			1.042	0.961	0.728	1.02
O75533	1.291	1.113	2.224	1.725	0.641	0.519	0.566	1.044	2.052	2.112	1.246	2.212	1.543	0.725	0.43	1.018	2.018	2.385	1.461	1.174	0.825	1.856	1.247	1.561	0.735	1.35	1.638	1.355	0.771	0.655	1.067	0.769	1.377	1.301	0.873	1.96	1.098	0.692	1.169	1.437	1.093	1.152	0.668	1.728	1.24	1.187	1.087	0.793	1.369
Q9P2J5	1.287	1.092	2.138	1.709	0.669	0.507	0.544	0.965	1.967	1.98	1.16	1.986	1.422	0.677	0.436	0.953	1.717	2.192	1.439	1.131	0.774	1.762	1.217	1.455	0.72	1.303	1.426	1.267	0.709	0.645	0.999	0.723	1.239	1.208	0.827	1.858	1.036	0.668	1.157	1.417	1.094	1.153	0.684	1.685	1.25	1.124	0.992	0.76	1.271
P11586	1.34	1.166	2.227	1.748	0.666	0.508	0.558	0.98	1.977	2.171	1.296	2.28	1.568	0.729	0.462	1.059	2.055	2.468	1.524	1.216	0.835	1.895	1.299	1.685	0.777	1.384	1.602	1.407	0.78	0.698	1.137	0.775	1.379	1.345	0.897	2.036	1.077	0.672	1.157	1.424	1.086	1.162	0.68	1.749	1.248	1.129	1.028	0.768	1.275
P17987	1.263	1.06	1.988	1.56	0.644	0.491	0.564	0.863	1.777	2.01	1.152	1.938	1.359	0.657	0.414	0.907	1.617	2.116	1.499	1.191	0.779	1.799	1.242	1.485	0.708	1.258	1.409	1.346	0.729	0.652	1.042	0.725	1.235	1.233	0.811	1.896	1.043	0.666	1.131	1.385	1.06	1.069	0.624	1.632	1.197	1.113	1.009	0.734	1.233
P49368	1.265	1.103	2.111	1.668	0.646	0.485	0.547	0.945	1.897	2.024	1.24	2.129	1.501	0.719	0.426	1.039	1.838	2.377	1.426	1.17	0.786	1.799	1.243	1.522	0.721	1.284	1.524	1.321	0.717	0.647	1.046	0.731	1.292	1.238	0.828	1.929	0.998	0.662	1.109	1.387	1.05	1.051	0.607	1.614	1.197	1.123	1.031	0.732	1.267
P13667	1.231	1.031	1.959	1.537	0.611	0.474	0.537	0.957	1.782	2.015	1.121	1.97	1.379	0.687	0.403	0.9	1.651	2.143	1.44	1.104	0.746	1.708	1.182	1.43	0.662	1.199	1.364	1.338	0.725	0.639	1.044	0.738	1.281	1.237	0.822	1.903	0.991	0.648	1.093	1.329	1.013	1.051	0.603	1.601	1.13	1.076	0.978	0.717	1.204
P06737	1.44	1.242	2.408	1.883	0.728	0.53	0.55	1.054	2.158	2.315	1.451	2.523	1.755	0.814	0.491	1.129	2.099	2.711	1.625	1.341	0.901	2.04	1.426	1.747	0.828	1.484	1.669	1.53	0.858	0.742	1.202	0.826	1.436	1.387	0.936	2.176	1.186	0.773	1.292	1.582	1.194	1.273	0.746	1.861	1.347	1.271	1.139	0.856	1.394
P08133	1.307	1.102	2.237	1.746	0.662	0.505	0.569	1.047	2.006	2.24	1.222	2.09	1.431	0.733	0.445	1.027	1.894	2.258	1.573	1.171	0.801	1.865	1.257	1.548	0.733	1.294	1.503	1.345	0.75	0.66	1.067	0.754	1.33	1.277	0.855	1.944	1.035	0.662	1.145	1.397	1.056	1.127	0.653	1.711	1.183	1.126	1.003	0.766	1.257
Q14974	1.323	1.139	2.155	1.709	0.669	0.489	0.571	0.983	1.959	2.135	1.274	2.135	1.532	0.718	0.442	1.01	1.918	2.358	1.507	1.184	0.785	1.802	1.274	1.592	0.737	1.28	1.559	1.359	0.757	0.68	1.087	0.742	1.3	1.249	0.84	1.958	1.072	0.679	1.145	1.49	1.103	1.106	0.651	1.677	1.254	1.197	1.082	0.796	1.335
A0A0A0MTS2	1.457	1.246	2.241	1.779	0.737	0.546	0.617	1.03	1.982	2.488	1.344	2.274	1.557	0.815	0.485	1.016	1.961	2.43	1.747	1.333	0.907	2.041	1.434	1.675	0.783	1.418	1.594	1.568	0.859	0.754	1.229	0.833	1.43	1.362	0.936	2.164	1.243	0.795	1.325	1.659	1.227	1.259	0.715	1.954	1.351	1.318	1.157	0.873	1.466
P55060	1.259	1.088	2.09	1.609	0.64	0.466	0.542	0.975	1.871	2.031	1.23	2.17	1.604	0.698	0.428	1.039	1.908	2.356	1.406	1.217	0.823	1.788	1.303	1.561	0.77	1.305	1.476	1.419	0.786	0.688	1.111	0.803	1.327	1.345	0.893	2.047	1.063	0.67	1.137	1.453	1.112	1.139	0.643	1.668	1.238	1.17	1.063	0.733	1.297
E9PKU7
A0A024R4E5	1.315	1.101	2.148	1.662	0.691	0.549	0.582	0.952	1.956	2.224	1.225	2.086	1.488	0.779	0.466	0.937	1.801	2.336	1.498	1.155	0.837	1.811	1.213	1.534	0.731	1.361	1.474	1.334	0.744	0.678	1.038	0.766	1.332	1.297	0.87	1.919	1.06	0.654	1.168	1.411	1.078	1.177	0.684	1.726	1.198	1.144	1.005	0.774	1.248
P04843	1.311	1.086	2.05	1.615	0.637	0.48	0.535	0.99	1.836	1.963	1.148	1.847	1.295	0.637	0.385	0.96	1.715	2.032	1.404	1.157	0.795	1.89	1.263	1.507	0.73	1.334	1.419	1.334	0.751	0.653	1.053	0.758	1.297	1.258	0.853	1.882	1.082	0.694	1.187	1.433	1.133	1.171	0.698	1.729	1.194	1.194	1.036	0.771	1.325
P07355	1.152	0.904	1.603	1.221	0.55	0.422	0.49	0.729	1.472	1.965	0.998	1.592	1.104	0.602	0.396	0.86	1.537	1.756	1.5	1.109	0.73	1.696	1.098	1.396	0.64	1.176	1.301	1.225	0.692	0.61	0.96	0.658	1.188	1.167	0.75	1.725	1.11	0.66	1.092	1.499	0.914	1.109	0.65	1.674	1.117	1.196	1.081	0.79	1.392
P27824	1.329	1.154	2.265	1.77	0.701	0.532	0.599	0.977	2.097	2.35	1.271	2.349	1.746	0.811	0.447	1.017	2.032	2.717	1.567	1.153	0.795	1.869	1.205	1.533	0.68	1.27	1.551	1.436	0.75	0.654	1.144	0.757	1.378	1.318	0.868	2.13	1.062	0.637	1.129	1.503	1.066	1.124	0.622	1.753	1.279	1.161	0.996	0.747	1.295
A0A0A0MRM8																												1.439	0.786	0.694	1.178	0.806	1.453	1.541	1.018	2.128										1.336	1.174	0.932	1.369
P68032	1.323	1.196	2.06	1.59	0.688	0.577	0.663	1.22	2.022	2.295	1.294	2.246	1.578	0.815	0.479	1.911	2.284	2.471	1.446	1.263	0.83	1.85	1.438	1.757	0.8	1.473	1.598	1.499	0.852	0.693	1.231	0.88	1.586	1.477	0.964	2.37	1.127	0.744	1.227	1.674	1.241	1.167	0.653	1.699	1.451	1.265	1.133	0.793	1.484
A0A0D9SGC1	1.263	1.09	2.053	1.588	0.665	0.515	0.543	0.925	1.856	2.095	1.243	2.059	1.467	0.75	0.464	0.952	1.729	2.329	1.513	1.168	0.806	1.82	1.245	1.54	0.748	1.319	1.459	1.3	0.735	0.678	1.041	0.753	1.344	1.274	0.877	1.942	1.026	0.661	1.157	1.34	1.082	1.127	0.65	1.627	1.179	1.167	1.039	0.777	1.25
P52209	1.234	1.026	1.965	1.518	0.596	0.437	0.513	0.88	1.753	1.967	1.24	2.157	1.494	0.676	0.416	0.977	1.787	2.294	1.446	1.143	0.743	1.701	1.214	1.439	0.687	1.244	1.39	1.326	0.704	0.635	1.021	0.708	1.206	1.181	0.782	1.829	1.071	0.692	1.145	1.388	1.055	1.077	0.618	1.636	1.194	1.15	1.038	0.761	1.262
Q8WUM4	1.362	1.158	2.272	1.721	0.675	0.527	0.579	1.004	2.006	2.147	1.176	2.079	1.515	0.724	0.442	1.001	1.779	2.328	1.466	1.157	0.795	1.749	1.236	1.527	0.736	1.297	1.471	1.396	0.756	0.676	1.061	0.769	1.348	1.314	0.877	2.023	1.101	0.69	1.156	1.463	1.089	1.172	0.649	1.762	1.26	1.163	1.053	0.741	1.306
P19338	1.241	1.033	1.924	1.472	0.593	0.433	0.502	0.872	1.683	2.143	1.174	1.943	1.341	0.682	0.425	0.883	1.587	2.087	1.494	1.168	0.77	1.713	1.136	1.426	0.644	1.162	1.369	1.377	0.738	0.627	1.014	0.711	1.218	1.213	0.774	1.892	1.081	0.689	1.159	1.36	1.024	1.099	0.611	1.762	1.139	1.139	1.055	0.759	1.269
O95466	1.323	1.144	2.27	1.796	0.672	0.522	0.58	1.019	2.031	2.144	1.27	2.263	1.586	0.75	0.451	1.082	1.988	2.458	1.573	1.233	0.837	1.922	1.319	1.659	0.739	1.393	1.592	1.37	0.751	0.677	1.089	0.789	1.35	1.315	0.879	2.011	1.01	0.632	1.114	1.361	1.073	1.109	0.623	1.632	1.194	1.185	1.075	0.774	1.327
Q16555	1.215	1.032	2.007	1.571	0.618	0.469	0.504	0.885	1.818	2.012	1.138	1.99	1.355	0.708	0.408	0.893	1.676	2.122	1.413	1.086	0.752	1.693	1.167	1.446	0.655	1.229	1.33	1.265	0.708	0.632	1.01	0.701	1.25	1.181	0.809	1.89	0.999	0.617	1.068	1.35	0.983	1.046	0.593	1.57	1.12	1.077	0.952	0.718	1.199
K7EKE6	1.179	1.009	1.988	1.536	0.6	0.465	0.513	0.891	1.773	1.986	1.093	1.886	1.33	0.657	0.415	0.899	1.639	2.102	1.48	1.099	0.752	1.708	1.138	1.435	0.668	1.203	1.432	1.261	0.701	0.622	0.988	0.694	1.205	1.166	0.795	1.796	0.962	0.622	1.065	1.287	0.98	1.027	0.59	1.561	1.112	1.058	0.96	0.713	1.203
P08758	1.279	1.097	2.082	1.644	0.611	0.446	0.528	0.974	1.801	2.003	1.248	2.116	1.505	0.642	0.401	1.077	1.932	2.255	1.383	1.174	0.755	1.691	1.248	1.464	0.746	1.223	1.377	1.418	0.749	0.653	1.106	0.762	1.272	1.298	0.826	1.878	1.03	0.636	1.134	1.389	1.067	1.033	0.616	1.555	1.167	1.121	1.036	0.707	1.214
P13489	1.309	1.12	2.076	1.615	0.664	0.541	0.575	1.005	1.897	2.121	1.19	1.976	1.443	0.718	0.446	1.04	1.76	2.181	1.593	1.18	0.791	1.75	1.22	1.504	0.695	1.233	1.409	1.407	0.77	0.658	1.07	0.742	1.333	1.297	0.86	1.996	1.06	0.67	1.163	1.392	1.051	1.14	0.653	1.771	1.18	1.193	1.085	0.815	1.346
O60506	1.301	1.06	2.17	1.638	0.637	0.483	0.529	0.914	1.883	2.051	1.167	2.076	1.401	0.67	0.422	0.931	1.724	2.182	1.436	1.128	0.777	1.782	1.175	1.5	0.721	1.258	1.417	1.291	0.708	0.622	1.009	0.686	1.206	1.19	0.778	1.807	1.055	0.659	1.128	1.361	1.079	1.119	0.634	1.657	1.116	1.151	1.064	0.75	1.253
P18669	1.484	1.263	2.486	1.928	0.777	0.581	0.648	1.13	2.145	2.587	1.384	2.389	1.641	0.88	0.494	1.241	2.126	2.516	1.669	1.27	0.884	1.995	1.37	1.639	0.735	1.401	1.57	1.534	0.819	0.731	1.187	0.843	1.441	1.382	0.904	2.142	1.208	0.781	1.294	1.652	1.246	1.224	0.697	1.949	1.376	1.312	1.159	0.833	1.446
A2A274	1.361	1.163	2.142	1.669	0.719	0.577	0.635	1.077	1.969	2.244	1.249	2.108	1.52	0.751	0.459	0.996	1.869	2.384	1.555	1.219	0.859	1.891	1.319	1.671	0.755	1.397	1.622	1.346	0.758	0.673	1.079	0.789	1.42	1.344	0.929	2.075	1.092	0.707	1.274	1.532	1.188	1.291	0.719	1.954	1.307	1.252	1.131	0.854	1.448
Q00839	1.193	0.936	1.849	1.362	0.576	0.44	0.521	0.808	1.587	2.239	1.164	1.982	1.299	0.64	0.411	0.867	1.626	2.049	1.548	1.081	0.774	1.688	1.07	1.435	0.627	1.137	1.359	1.3	0.716	0.644	1.009	0.669	1.245	1.176	0.785	1.835	1.044	0.65	1.135	1.347	1.031	1.114	0.603	1.699	1.14	1.148	1.016	0.763	1.223
Q63HN8	1.446	1.239	2.334	1.808	0.774	0.606	0.623	1.037	2.154	2.262	1.353	2.339	1.659	0.791	0.511	1.07	2.068	2.673	1.512	1.346	0.973	2.069	1.459	1.896	0.928	1.66	1.749	1.487	0.815	0.81	1.204	0.9	1.547	1.471	1.051	2.275	1.091	0.705	1.254	1.482	1.198	1.288	0.81	1.928	1.351	1.253	1.151	0.844	1.421
A0A1W2PPS1	1.121	0.945	1.677	1.281	0.645	0.471	0.654	0.916	1.614	2.284	0.94	1.341	0.944	0.581	0.371	0.89	1.421	1.529	1.574	0.896	0.844	1.796	1.061	1.591	0.655	1.27	1.517	1.052	0.631	0.603	0.892	0.628	1.293	1.196	0.751	1.674	1.182	0.726	1.48	1.894	1.221	1.434	0.8	2.401	1.36	0.865	0.969	0.758	1.473
P16615	1.295	1.071	2.036	1.569	0.637	0.477	0.547	0.934	1.802	2.156	1.179	2.066	1.428	0.728	0.434	0.923	1.739	2.177	1.467	1.166	0.795	1.793	1.197	1.551	0.697	1.293	1.581	1.304	0.734	0.662	1.025	0.727	1.28	1.208	0.82	1.889	1.061	0.672	1.155	1.406	1.055	1.143	0.656	1.762	1.205	1.161	1.032	0.788	1.284
P35606	1.256	1.066	2.069	1.617	0.638	0.485	0.544	1.002	1.878	2.005	1.202	2.028	1.431	0.672	0.411	1.07	1.896	2.266	1.486	1.171	0.825	1.941	1.262	1.627	0.74	1.421	1.635	1.334	0.754	0.677	1.068	0.75	1.376	1.33	0.894	1.998	1.066	0.689	1.19	1.455	1.103	1.199	0.689	1.785	1.272	1.162	1.033	0.787	1.338
P30153	1.306	1.144	2.086	1.597	0.659	0.523	0.578	1.026	1.905	2.036	1.148	2.019	1.51	0.703	0.43	1.069	1.861	2.245	1.43	1.201	0.784	1.776	1.251	1.528	0.723	1.292	1.493	1.386	0.767	0.645	1.097	0.782	1.356	1.347	0.863	2.028	1.052	0.671	1.146	1.46	1.102	1.103	0.614	1.737	1.233	1.172	1.094	0.73	1.33
P11215	1.316	1.122	2.069	1.613	0.711	0.562	0.608	1.035	1.938	2.021	1.247	2.081	1.538	0.713	0.484	0.994	1.885	2.354	1.405	1.204	0.837	1.815	1.277	1.593	0.82	1.39	1.589	1.33	0.756	0.667	1.079	0.759	1.393	1.388	0.965	1.963	1.044	0.715	1.212	1.444	1.162	1.226	0.703	1.765	1.229	1.174	1.086	0.821	1.321
P07195	1.294	1.102	2.203	1.732	0.629	0.446	0.517	0.882	1.902	2.253	1.235	2.177	1.479	0.689	0.415	0.975	1.895	2.246	1.436	1.184	0.738	1.802	1.239	1.471	0.67	1.171	1.355	1.419	0.743	0.649	1.099	0.736	1.275	1.23	0.792	1.916	1.008	0.633	1.066	1.346	0.986	0.995	0.556	1.5	1.113	1.061	0.961	0.639	1.146
P23381	1.142	0.923	1.79	1.408	0.554	0.417	0.501	0.851	1.603	1.961	1.061	1.843	1.291	0.643	0.368	0.87	1.578	1.966	1.349	1.08	0.718	1.651	1.142	1.379	0.655	1.146	1.287	1.23	0.665	0.597	0.956	0.675	1.155	1.127	0.75	1.695	0.952	0.625	1.036	1.282	0.964	1.004	0.571	1.529	1.106	0.995	0.91	0.649	1.137
P54136	1.267	1.116	2.216	1.737	0.654	0.474	0.512	0.951	1.972	2.025	1.29	2.249	1.585	0.692	0.424	1.02	1.926	2.411	1.426	1.156	0.806	1.85	1.257	1.531	0.744	1.295	1.535	1.332	0.743	0.667	1.037	0.738	1.291	1.248	0.851	1.974	1.065	0.669	1.161	1.406	1.104	1.146	0.682	1.635	1.264	1.117	1.038	0.745	1.251
P60174	1.429	1.258	2.175	1.646	0.715	0.554	0.64	1.008	1.841	2.5	1.335	2.147	1.615	0.811	0.486	1.097	1.851	2.308	1.627	1.33	0.85	1.882	1.347	1.616	0.756	1.317	1.482	1.606	0.849	0.717	1.201	0.854	1.426	1.388	0.915	2.198	1.232	0.716	1.273	1.621	1.179	1.206	0.644	1.827	1.379	1.335	1.223	0.803	1.473
Q99460	1.28	1.102	2.094	1.627	0.649	0.511	0.561	0.962	1.942	2.214	1.265	2.212	1.543	0.778	0.479	1.016	1.947	2.423	1.486	1.18	0.826	1.851	1.288	1.585	0.758	1.345	1.558	1.324	0.728	0.664	1.048	0.747	1.289	1.254	0.837	1.921	1.046	0.646	1.142	1.343	1.044	1.121	0.636	1.679	1.155	1.17	1.054	0.749	1.279
Q13263	1.236	1.06	2.078	1.613	0.627	0.479	0.538	0.942	1.908	2.032	1.171	2.041	1.443	0.69	0.399	0.967	1.773	2.262	1.466	1.126	0.787	1.816	1.211	1.524	0.681	1.277	1.454	1.297	0.724	0.654	1.075	0.753	1.334	1.278	0.86	1.961	1.019	0.631	1.122	1.42	1.035	1.124	0.609	1.745	1.188	1.104	0.986	0.718	1.276
Q5VZU9	1.338	1.157	2.394	1.873	0.704	0.546	0.536	1.061	2.141	2.194	1.354	2.386	1.685	0.79	0.517	1.037	2.04	2.628	1.412	1.2	0.848	1.896	1.28	1.632	0.769	1.417	1.607	1.349	0.774	0.68	1.088	0.792	1.376	1.325	0.917	2.046	1.047	0.688	1.177	1.456	1.15	1.191	0.687	1.696	1.275	1.157	1.028	0.803	1.336
Q5T0R9	1.244	1.286	2.509	2.125	0.706	0.452	0.434	1.043	2.191	1.768	1.442	2.549	1.857	0.645	0.352	1.138	2.246	2.807	1.245	1.178	0.761	1.791	1.396	1.417	0.816	1.271	1.271	1.364	0.687	0.772	1.175	0.869	1.295	1.344	0.923	2.092	1.001	0.619	1.071	1.495	1.153	1.023	0.548	1.411	1.244	1.122	1.051	0.63	1.336
A8MXP9	1.134	0.882	1.677	1.238	0.537	0.413	0.493	0.808	1.504	2.069	1.017	1.649	1.108	0.622	0.383	0.851	1.409	1.828	1.368	1.072	0.755	1.646	1.117	1.369	0.667	1.19	1.284	1.258	0.719	0.596	0.979	0.685	1.219	1.181	0.785	1.787	1.05	0.627	1.143	1.362	1.052	1.122	0.634	1.694	1.116	1.182	1.04	0.776	1.239
Q3BDU5										2.806	0.985	1.657	1.218	0.83	0.525	1.015	1.335	1.85	1.647	1.09	0.786	1.594	1.077	1.25	0.69	1.093	1.149	0.992	0.529	0.532	0.866	0.623	1.007	1.163	0.728	1.415
P02786	1.325	1.099	2.019	1.579	0.659	0.517	0.584	0.939	1.844	2.351	1.304	2.156	1.505	0.794	0.514	0.967	1.906	2.368	1.625	1.203	0.814	1.805	1.244	1.531	0.742	1.34	1.512	1.393	0.754	0.705	1.061	0.752	1.326	1.286	0.873	2.011	1.108	0.722	1.204	1.451	1.102	1.142	0.653	1.734	1.23	1.212	1.08	0.83	1.347
P31948	1.302	1.08	1.941	1.434	0.632	0.48	0.551	0.944	1.719	2.143	1.105	1.886	1.386	0.725	0.426	0.955	1.674	2.027	1.386	1.105	0.759	1.68	1.218	1.472	0.668	1.242	1.386	1.377	0.728	0.632	1.041	0.781	1.361	1.309	0.848	1.891	1.058	0.697	1.095	1.406	1.051	1.068	0.534	1.665	1.156	1.092	1.015	0.665	1.212
Q5T4S7	1.36	1.196	2.325	1.797	0.705	0.521	0.485	1.039	2.122	1.661	1.371	2.456	1.737	0.696	0.465	0.998	2.119	2.789	1.392	1.252	0.887	1.87	1.313	1.649	0.844	1.459	1.613	1.422	0.785	0.708	1.099	0.813	1.414	1.412	0.952	2.042	1.06	0.73	1.211	1.403	1.149	1.259	0.77	1.695	1.291	1.096	1.003	0.754	1.248
Q02880	1.264	1.065	2.182	1.587	0.638	0.483	0.509	0.9	1.861	1.898	1.258	2.086	1.399	0.616	0.414	0.95	1.777	2.379	1.37	1.11	0.74	1.628	1.125	1.488	0.707	1.175	1.462	1.294	0.702	0.612	0.964	0.685	1.133	1.142	0.798	1.744	1.066	0.646	1.144	1.342	1.055	1.125	0.639	1.548	1.124	1.097	0.992	0.774	1.248
P48147	1.338	1.176	2.338	1.86	0.711	0.553	0.583	1.084	2.138	2.205	1.329	2.296	1.631	0.787	0.493	1.153	2.117	2.55	1.548	1.215	0.875	2.013	1.335	1.639	0.809	1.456	1.583	1.396	0.809	0.709	1.124	0.814	1.395	1.401	0.922	2.076	1.095	0.681	1.236	1.494	1.177	1.261	0.767	1.821	1.344	1.213	1.09	0.819	1.374
V9GYM8	1.322	1.084	2.013	1.597	0.669	0.54	0.562	0.975	1.879	2.312	1.184	1.934	1.447	0.757	0.461	1.051	1.771	2.197	1.46	1.199	0.811	1.849	1.281	1.575	0.784	1.353	1.548	1.368	0.764	0.687	1.138	0.791	1.413	1.375	0.929	2.044	1.039	0.672	1.194	1.467	1.12	1.212	0.658	1.777	1.263	1.173	1.051	0.78	1.319
Q92608	1.323	1.138	2.218	1.804	0.677	0.532	0.555	1.042	2.104	1.876	1.22	2.172	1.551	0.653	0.434	1.002	1.987	2.427	1.492	1.142	0.815	1.877	1.245	1.608	0.741	1.376	1.651	1.364	0.735	0.689	1.068	0.77	1.392	1.312	0.911	2.044	0.99	0.659	1.126	1.355	1.055	1.12	0.668	1.632	1.209	1.155	1.005	0.748	1.258
E9PHY5	1.378	1.133	2.158	1.699	0.693	0.557	0.619	1.032	1.979	2.463	1.283	2.183	1.553	0.845	0.492	1.038	1.832	2.434	1.658	1.198	0.854	1.94	1.306	1.576	0.743	1.343	1.542	1.466	0.793	0.715	1.133	0.828	1.412	1.375	0.933	2.094	1.094	0.707	1.226	1.484	1.11	1.196	0.7	1.827	1.238	1.227	1.099	0.82	1.323
P61978	1.282	1.058	2.074	1.615	0.656	0.49	0.565	0.944	1.829	2.231	1.144	1.85	1.291	0.686	0.412	0.98	1.666	1.999	1.536	1.135	0.791	1.79	1.205	1.432	0.689	1.267	1.416	1.301	0.754	0.672	1.037	0.734	1.278	1.249	0.841	1.846	1.086	0.699	1.227	1.483	1.158	1.195	0.691	1.776	1.187	1.191	1.076	0.82	1.329
Q12965	1.323	1.047	2.074	1.636	0.662	0.488	0.53	0.932	1.881	2.264	1.304	2.262	1.582	0.74	0.478	0.994	1.945	2.521	1.646	1.2	0.811	1.854	1.256	1.505	0.728	1.257	1.457	1.433	0.765	0.72	1.125	0.767	1.293	1.267	0.847	2.05	1.119	0.696	1.22	1.44	1.071	1.183	0.682	1.665	1.246	1.178	1.02	0.788	1.248
A0A0G2JIW1	1.35	1.122	2.136	1.656	0.662	0.505	0.579	0.948	1.872	2.312	1.313	2.251	1.559	0.766	0.458	0.989	1.858	2.449	1.522	1.201	0.809	1.829	1.264	1.561	0.716	1.279	1.458	1.418	0.749	0.684	1.083	0.765	1.323	1.284	0.849	2.042	1.083	0.666	1.175	1.401	1.065	1.128	0.65	1.718	1.199	1.183	1.044	0.774	1.317
P04844	1.294	1.135	2.166	1.714	0.687	0.51	0.544	1.015	1.88	2.034	1.237	2.16	1.48	0.738	0.451	0.974	1.869	2.293	1.542	1.199	0.835	1.82	1.261	1.533	0.753	1.342	1.5	1.288	0.748	0.687	1.026	0.76	1.305	1.242	0.869	1.893	1.062	0.679	1.169	1.419	1.114	1.155	0.699	1.675	1.231	1.176	1.022	0.782	1.273
Q01813	1.408	1.207	2.353	1.853	0.711	0.516	0.56	1.051	2.065	2.321	1.445	2.489	1.749	0.783	0.484	1.122	2.14	2.73	1.576	1.256	0.832	1.981	1.352	1.673	0.78	1.411	1.569	1.447	0.794	0.746	1.181	0.829	1.495	1.385	0.941	2.186	1.124	0.711	1.259	1.563	1.164	1.219	0.7	1.778	1.262	1.249	1.107	0.818	1.387
O60763	1.282	1.053	1.99	1.541	0.634	0.492	0.561	0.936	1.813	2.359	1.168	1.933	1.346	0.733	0.423	0.91	1.689	2.073	1.547	1.111	0.817	1.795	1.187	1.454	0.671	1.259	1.414	1.271	0.712	0.643	0.995	0.732	1.275	1.243	0.814	1.819	1.028	0.655	1.144	1.383	1.069	1.091	0.61	1.676	1.168	1.14	1.005	0.762	1.232
Q92835	1.318	1.141	2.242	1.757	0.713	0.507	0.553	1.008	1.964	2.155	1.325	2.19	1.561	0.768	0.456	1.056	1.976	2.445	1.593	1.226	0.899	1.938	1.339	1.672	0.77	1.442	1.618	1.375	0.769	0.692	1.105	0.803	1.421	1.361	0.937	2.058	1.082	0.688	1.17	1.433	1.089	1.185	0.673	1.744	1.233	1.168	1.04	0.822	1.328
Q68CZ2	1.317	1.093	2.052	1.543	0.68	0.514	0.565	0.906	1.885	2.048	1.272	2.098	1.483	0.714	0.457	0.971	1.864	2.331	1.41	1.162	0.817	1.808	1.239	1.526	0.783	1.388	1.496	1.366	0.776	0.72	1.068	0.805	1.442	1.372	0.929	2.056	1.044	0.674	1.182	1.372	1.07	1.172	0.662	1.706	1.171	1.166	1.034	0.806	1.289
P61158	1.335	1.145	2.301	1.79	0.668	0.517	0.578	1.04	2.062	2.277	1.242	2.158	1.5	0.757	0.424	1.037	1.947	2.321	1.602	1.175	0.795	1.807	1.211	1.484	0.69	1.258	1.427	1.368	0.758	0.678	1.069	0.764	1.331	1.276	0.851	1.942	1.075	0.688	1.151	1.416	1.073	1.108	0.651	1.681	1.197	1.154	1.031	0.776	1.265
P04040	1.403	1.227	2.259	1.758	0.728	0.553	0.594	1.071	1.991	2.402	1.409	2.298	1.711	0.846	0.501	1.091	1.973	2.513	1.675	1.277	0.903	1.936	1.321	1.673	0.774	1.448	1.64	1.504	0.842	0.749	1.157	0.843	1.486	1.409	0.954	2.164	1.198	0.775	1.326	1.589	1.218	1.318	0.73	1.989	1.376	1.314	1.214	0.88	1.476
P41250	1.16	0.949	1.779	1.413	0.585	0.445	0.492	0.791	1.572	1.941	1.085	1.847	1.277	0.638	0.393	0.881	1.535	2.019	1.284	1.025	0.709	1.598	1.068	1.311	0.638	1.128	1.23	1.2	0.666	0.59	0.932	0.667	1.155	1.105	0.745	1.647	0.904	0.556	0.998	1.178	0.905	0.964	0.57	1.475	1.029	0.963	0.868	0.633	1.061
P54577	1.168	0.982	1.891	1.458	0.578	0.444	0.476	0.856	1.658	1.754	1.108	1.905	1.357	0.613	0.378	0.911	1.626	2.055	1.302	1.054	0.698	1.566	1.108	1.325	0.652	1.144	1.257	1.242	0.679	0.602	0.955	0.69	1.212	1.157	0.769	1.77	0.937	0.597	1.03	1.233	0.952	0.976	0.568	1.503	1.061	1.02	0.92	0.673	1.142
A0A0A6YYL4	1.278	1.113	2.105	1.614	0.703	0.576	0.613	0.962	1.967	2.1	1.039	1.651	1.185	0.685	0.45	0.843	1.447	1.878	1.425	1.08	0.802	1.738	1.165	1.494	0.717	1.329	1.31	1.286	0.73	0.655	1.027	0.773	1.385	1.338	0.91	1.93	0.993	0.646	1.144	1.377	1.089	1.226	0.68	1.794	1.194	1.08	1.006	0.751	1.238
A0A2R8YEA7	1.416	1.037	1.503	1.194	0.567	0.388	0.547	0.909	1.457	0.858	1.161	1.646	1.013	0.542	0.404	1.202	2.443	1.57	1.363	1.182	0.874	1.63	1.508	1.759	0.722	1.292	1.181	1.237	0.881	0.813	1.084	0.777	1.275	1.17	0.86	1.684	1.094	0.748	1.166	1.527	1.045	0.992	0.719	1.496	0.988	1.25	1.119	1.024	1.492
P00338	1.495	1.242	2.398	1.913	0.72	0.523	0.599	1.087	2.05	2.522	1.476	2.524	1.674	0.8	0.489	1.092	2.185	2.568	1.911	1.361	0.93	2.161	1.435	1.709	0.778	1.472	1.63	1.661	0.891	0.785	1.265	0.83	1.461	1.377	0.939	2.223	1.31	0.794	1.391	1.754	1.288	1.321	0.755	1.956	1.397	1.488	1.248	0.953	1.618
Q13045	1.337	1.15	2.252	1.734	0.692	0.542	0.568	1	1.999	2.08	1.273	2.127	1.516	0.711	0.431	0.947	1.86	2.362	1.406	1.221	0.851	1.828	1.312	1.619	0.827	1.416	1.568	1.338	0.751	0.679	1.067	0.77	1.357	1.296	0.891	2.012	1.072	0.68	1.172	1.407	1.099	1.175	0.69	1.72	1.192	1.184	1.057	0.822	1.284
Q15029	1.299	1.07	2.145	1.673	0.655	0.5	0.569	0.979	1.985	2.258	1.232	1.965	1.41	0.767	0.467	0.96	1.687	2.316	1.458	1.205	0.829	1.834	1.257	1.588	0.765	1.275	1.492	1.332	0.753	0.679	1.072	0.741	1.298	1.26	0.848	1.943	1.103	0.7	1.169	1.502	1.105	1.178	0.706	1.744	1.257	1.188	1.092	0.813	1.34
P17812	1.31	1.091	1.996	1.604	0.679	0.512	0.564	0.928	1.835	2.054	1.204	2.079	1.471	0.69	0.433	0.961	1.818	2.326	1.565	1.19	0.827	1.863	1.224	1.533	0.72	1.284	1.432	1.386	0.758	0.683	1.079	0.759	1.352	1.295	0.878	2.038	1.107	0.696	1.182	1.428	1.093	1.16	0.669	1.8	1.205	1.2	1.065	0.784	1.349
Q9BUF5	1.315	1.175	2.238	1.79	0.677	0.493	0.578	1.063	2.032	2.121	1.274	2.262	1.558	0.693	0.389	1.112	2.164	2.429	1.405	1.203	0.812	2.014	1.358	1.701	0.792	1.41	1.789	1.405	0.798	0.72	1.173	0.802	1.478	1.405	0.905	2.143	1.043	0.65	1.18	1.49	1.125	1.112	0.672	1.703	1.285	1.19	1.028	0.77	1.321
Q15393	1.214	1.08	2.016	1.594	0.659	0.511	0.531	0.956	1.868	1.98	1.249	2.118	1.493	0.695	0.452	0.967	1.786	2.309	1.447	1.18	0.799	1.74	1.236	1.513	0.724	1.274	1.423	1.285	0.739	0.65	1.005	0.713	1.224	1.21	0.819	1.858	1.046	0.684	1.162	1.378	1.061	1.147	0.681	1.663	1.189	1.157	1.082	0.813	1.272
A0A2U3TZM0	1.319	1.13	2.201	1.706	0.679	0.555	0.612	1.042	2.107	2.258	1.239	2.133	1.461	0.767	0.475	1.052	1.943	2.42	1.52	1.175	0.794	1.914	1.276	1.584	0.738	1.33	1.596	1.346	0.752	0.679	1.097	0.76	1.398	1.342	0.922	2.092	1.016	0.634	1.133	1.426	1.054	1.17	0.688	1.725	1.212	1.176	1.053	0.804	1.346
O15144	1.303	1.102	2.086	1.634	0.641	0.486	0.536	0.94	1.831	2.093	1.226	2.05	1.394	0.689	0.423	0.957	1.771	2.156	1.602	1.197	0.803	1.834	1.251	1.526	0.74	1.348	1.465	1.387	0.773	0.684	1.06	0.742	1.299	1.26	0.845	1.898	1.115	0.707	1.198	1.429	1.106	1.175	0.692	1.73	1.223	1.177	1.045	0.801	1.299
P60842	1.362	1.209	2.289	1.825	0.704	0.535	0.59	1.006	2.111	2.196	1.28	2.257	1.589	0.7	0.443	1.098	2.027	2.507	1.527	1.205	0.811	1.995	1.303	1.646	0.769	1.32	1.563	1.352	0.746	0.667	1.089	0.755	1.372	1.3	0.855	1.961	1.069	0.656	1.171	1.47	1.081	1.137	0.659	1.748	1.231	1.127	1.026	0.761	1.277
P17858	1.405	1.205	2.326	1.863	0.731	0.558	0.594	1.12	2.138	2.028	1.262	2.111	1.486	0.701	0.42	1.136	2.006	2.316	1.588	1.231	0.883	2.015	1.325	1.664	0.747	1.449	1.68	1.394	0.787	0.714	1.119	0.776	1.415	1.366	0.93	2.074	1.061	0.69	1.196	1.458	1.136	1.2	0.682	1.771	1.267	1.207	1.039	0.813	1.364
P05455	1.293	1.042	2.035	1.58	0.593	0.461	0.542	1.016	1.801	2.221	1.146	2.035	1.431	0.687	0.407	0.954	1.909	2.192	1.569	1.158	0.811	1.901	1.248	1.549	0.695	1.256	1.539	1.42	0.747	0.651	1.104	0.782	1.329	1.273	0.844	1.991	1.037	0.644	1.127	1.384	1.022	1.063	0.564	1.688	1.173	1.139	1.01	0.701	1.238
Q9UH99	1.339	1.201	2.288	1.808	0.732	0.556	0.614	1.056	2.141	2.289	1.354	2.275	1.627	0.805	0.487	1.127	2.085	2.566	1.515	1.193	0.848	1.9	1.338	1.631	0.788	1.438	1.636	1.401	0.8	0.702	1.149	0.82	1.455	1.439	0.941	2.24	1.058	0.704	1.2	1.479	1.138	1.225	0.678	1.821	1.358	1.272	1.115	0.858	1.411
Q16658	1.291	1.114	1.999	1.574	0.685	0.534	0.592	1.001	1.829	2.221	1.21	1.973	1.397	0.742	0.458	0.997	1.787	2.181	1.537	1.191	0.848	1.87	1.248	1.567	0.751	1.362	1.488	1.373	0.774	0.674	1.045	0.748	1.305	1.293	0.864	1.921	1.067	0.679	1.193	1.409	1.084	1.164	0.658	1.751	1.173	1.18	1.079	0.829	1.343
P40926	1.348	1.149	2.223	1.745	0.661	0.478	0.555	0.913	1.91	2.293	1.347	2.276	1.606	0.754	0.464	0.991	1.821	2.422	1.512	1.181	0.782	1.769	1.245	1.455	0.701	1.208	1.342	1.405	0.741	0.665	1.075	0.739	1.28	1.223	0.806	1.921	1.061	0.69	1.146	1.413	1.057	1.067	0.638	1.643	1.182	1.156	1.049	0.762	1.262
P41252	1.29	1.149	2.295	1.798	0.695	0.519	0.572	1.042	2.142	1.941	1.228	2.116	1.47	0.658	0.431	1.005	1.937	2.272	1.396	1.144	0.781	1.789	1.222	1.555	0.755	1.313	1.506	1.291	0.715	0.661	1.016	0.734	1.301	1.242	0.854	1.927	1.003	0.618	1.096	1.351	1.042	1.113	0.663	1.596	1.203	1.106	0.978	0.729	1.228
P49411	1.331	1.138	2.162	1.722	0.68	0.53	0.575	0.984	1.986	2.053	1.201	2.064	1.452	0.686	0.44	0.971	1.848	2.257	1.468	1.165	0.783	1.82	1.246	1.51	0.72	1.295	1.426	1.347	0.734	0.663	1.061	0.737	1.318	1.258	0.853	1.95	1	0.644	1.109	1.327	0.999	1.076	0.634	1.69	1.143	1.099	0.995	0.743	1.234
Q10567	1.356	1.212	2.489	1.932	0.77	0.561	0.578	1.168	2.27	2.101	1.263	2.288	1.544	0.733	0.47	1.046	2.045	2.509	1.509	1.186	0.805	1.883	1.322	1.596	0.787	1.293	1.585	1.301	0.762	0.687	1.049	0.784	1.429	1.399	0.908	2.026	1.064	0.726	1.222	1.462	1.166	1.226	0.724	1.818	1.331	1.194	1.09	0.809	1.319
P26639	1.22	1.052	2.078	1.641	0.62	0.478	0.512	0.964	1.893	1.947	1.195	2.093	1.452	0.674	0.416	1.003	1.876	2.291	1.389	1.129	0.777	1.753	1.198	1.484	0.709	1.276	1.474	1.231	0.696	0.623	1.008	0.696	1.236	1.157	0.787	1.858	0.984	0.627	1.072	1.348	1.017	1.042	0.624	1.548	1.171	1.062	0.963	0.701	1.179
P51854	1.299	1.119	2.188	1.757	0.675	0.483	0.54	0.976	1.971	2.118	1.245	2.133	1.514	0.724	0.445	1.033	1.914	2.298	1.583	1.188	0.878	1.916	1.272	1.559	0.769	1.428	1.49	1.39	0.794	0.718	1.12	0.795	1.36	1.316	0.91	2.073	1.079	0.701	1.215	1.457	1.12	1.201	0.731	1.858	1.21	1.211	1.06	0.818	1.365
P63104	1.258	1.089	1.99	1.562	0.618	0.462	0.525	0.942	1.76	2.057	1.318	2.289	1.637	0.728	0.431	1.031	1.879	2.413	1.458	1.179	0.773	1.677	1.243	1.449	0.69	1.193	1.422	1.386	0.772	0.649	1.078	0.783	1.274	1.269	0.838	1.928	1.008	0.658	1.086	1.336	1.018	1.003	0.569	1.493	1.123	1.105	1.021	0.736	1.209
Q8TDZ2	1.416	1.183	2.331	1.83	0.721	0.553	0.583	1.026	2.071	2.34	1.309	2.186	1.529	0.77	0.477	1.075	1.929	2.465	1.664	1.215	0.899	1.942	1.339	1.662	0.777	1.388	1.633	1.414	0.783	0.714	1.124	0.818	1.431	1.391	0.951	2.074	1.099	0.675	1.21	1.507	1.149	1.229	0.716	1.829	1.266	1.263	1.097	0.837	1.379
Q0VD83	1.287	1.088	1.931	1.507	0.698	0.564	0.648	1.029	1.897	2.659	1.213	1.84	1.371	0.869	0.502	1.073	1.622	2.175	1.681	1.096	0.882	1.91	1.268	1.573	0.668	1.32	1.443	1.406	0.801	0.69	1.183	0.832	1.532	1.457	0.992	2.188	0.974	0.645	1.218	1.47	1.062	1.228	0.601	1.963	1.261	1.202	1.089	0.839	1.4
P13645	2.682	0.801	1.163	0.86	0.382	0.38	0.39	0.616	2.196	1.688	0.851	1.169	1.034	0.721	0.686	1.233	0.86	1.329	0.84	0.687	0.383	0.925	0.845	3.186	0.587	0.804	1.14	0.314	0.31	0.312	0.919	0.181	0.776	0.343	0.329	0.531	0.214	0.12	0.169	0.186	0.235	0.199	0.084	0.427	0.252	0.35	0.362	0.351	0.398
P21980	1.441	1.217	2.219	1.724	0.753	0.591	0.648	1.093	2.036	2.417	1.349	2.27	1.628	0.817	0.5	1.101	2.031	2.499	1.716	1.303	0.897	2.078	1.427	1.707	0.812	1.533	1.666	1.468	0.825	0.742	1.2	0.872	1.472	1.469	1.015	2.169	1.185	0.755	1.345	1.617	1.242	1.294	0.753	1.929	1.35	1.303	1.165	0.91	1.445
Q9Y3Z3	1.458	1.208	2.392	1.847	0.722	0.555	0.615	1.065	2.116	2.568	1.426	2.572	1.815	0.903	0.51	1.199	2.173	2.854	1.786	1.322	0.925	2.155	1.45	1.715	0.8	1.471	1.788	1.537	0.854	0.771	1.227	0.875	1.559	1.484	0.992	2.297	1.126	0.707	1.25	1.545	1.17	1.221	0.709	1.855	1.319	1.343	1.138	0.856	1.449
P40227	1.263	1.061	2.02	1.561	0.637	0.474	0.55	0.851	1.726	2.036	1.164	1.972	1.36	0.657	0.414	0.874	1.625	2.121	1.525	1.18	0.776	1.713	1.183	1.425	0.702	1.202	1.345	1.34	0.71	0.64	0.993	0.714	1.177	1.139	0.781	1.801	1.033	0.673	1.107	1.339	1.017	1.039	0.628	1.589	1.121	1.129	1.023	0.754	1.214
O60841	1.288	1.068	2.055	1.554	0.644	0.514	0.554	0.982	1.86	2.447	1.272	2.212	1.566	0.844	0.466	0.977	1.868	2.446	1.471	1.154	0.837	1.814	1.266	1.527	0.718	1.308	1.522	1.311	0.753	0.684	1.052	0.785	1.34	1.315	0.866	1.939	1.033	0.71	1.183	1.454	1.143	1.197	0.69	1.758	1.241	1.224	1.078	0.835	1.335
P04264	1.89	0.861	0.979	0.682	0.251	0.288	0.343	0.514	1.207	1.114	0.617	1.695	0.72	0.408	0.525	0.989	0.615	0.873	0.83	0.82	0.304	0.754	0.764	2.32	0.711	0.885	1.165	0.334	0.329	0.307	0.61	0.168	0.743	0.378	0.313	0.545	0.308	0.159	0.23	0.211	0.21	0.264	0.087	0.564	0.339	0.297	0.332	0.581	0.343
P63010	1.255	1.04	1.918	1.532	0.607	0.443	0.495	0.889	1.704	1.927	1.195	2.066	1.455	0.666	0.416	0.885	1.695	2.213	1.399	1.162	0.794	1.739	1.245	1.495	0.729	1.263	1.439	1.304	0.706	0.653	1.018	0.722	1.26	1.203	0.832	1.885	1.056	0.67	1.106	1.391	1.047	1.068	0.634	1.572	1.169	1.126	1.049	0.764	1.265
P25205	1.3	1.158	2.188	1.715	0.692	0.525	0.541	0.981	1.987	2.06	1.282	2.193	1.601	0.731	0.442	1.015	1.86	2.466	1.457	1.216	0.847	1.88	1.311	1.582	0.76	1.36	1.545	1.35	0.774	0.701	1.061	0.782	1.401	1.315	0.915	1.982	1.087	0.704	1.197	1.435	1.147	1.218	0.739	1.796	1.284	1.184	1.075	0.827	1.344
Q9Y6N5	1.186	0.976	1.843	1.437	0.569	0.455	0.477	0.854	1.65	1.943	1.275	2.17	1.523	0.71	0.437	0.976	1.767	2.382	1.38	1.118	0.792	1.835	1.211	1.555	0.751	1.324	1.503	1.307	0.725	0.667	1.054	0.733	1.307	1.255	0.844	1.942	1.005	0.612	1.081	1.352	1.03	1.098	0.642	1.577	1.192	1.096	0.96	0.757	1.252
P46459	1.345	1.108	2.093	1.598	0.666	0.511	0.595	0.928	1.906	2.24	1.23	2.03	1.404	0.754	0.453	0.937	1.706	2.207	1.638	1.181	0.801	1.815	1.241	1.495	0.681	1.242	1.42	1.364	0.756	0.663	1.042	0.733	1.274	1.236	0.815	1.944	1.036	0.668	1.129	1.355	1.048	1.077	0.629	1.655	1.159	1.131	1.001	0.75	1.248
E9PLK3	1.355	1.187	2.449	1.938	0.687	0.502	0.531	1.036	2.19	2.093	1.283	2.29	1.581	0.716	0.483	1.011	2.046	2.466	1.482	1.229	0.812	1.886	1.324	1.625	0.752	1.374	1.619	1.404	0.789	0.727	1.149	0.785	1.345	1.304	0.898	2.144	1.086	0.689	1.201	1.451	1.118	1.158	0.647	1.712	1.242	1.186	1.083	0.819	1.327
P14868	1.325	1.129	2.25	1.773	0.662	0.519	0.559	1.071	2.022	2.123	1.231	2.176	1.497	0.704	0.434	1.073	2.045	2.32	1.516	1.207	0.83	1.915	1.314	1.663	0.763	1.444	1.63	1.342	0.767	0.677	1.061	0.786	1.385	1.303	0.903	1.97	1.062	0.705	1.212	1.437	1.137	1.177	0.683	1.755	1.229	1.162	1.028	0.782	1.296
O60664	1.442	1.246	2.321	1.75	0.709	0.559	0.657	1.056	2.117	2.453	1.135	1.946	1.478	0.746	0.434	1.084	1.889	2.181	1.638	1.239	0.853	1.958	1.324	1.636	0.692	1.334	1.631	1.497	0.818	0.696	1.198	0.869	1.573	1.475	0.965	2.233	1.156	0.734	1.224	1.679	1.219	1.21	0.588	1.926	1.393	1.25	1.145	0.744	1.436
O00160	1.307	1.015	2.037	1.646	0.648	0.489	0.505	0.99	1.922	2.194	1.188	1.908	1.352	0.694	0.431	1.005	1.728	2.197	1.424	1.154	0.783	1.72	1.204	1.501	0.704	1.353	1.445	1.258	0.693	0.59	0.965	0.685	1.215	1.205	0.799	1.787	1.144	0.707	1.288	1.512	1.182	1.27	0.719	1.832	1.245	1.239	1.119	0.849	1.411
Q12906	1.297	1.015	2.003	1.496	0.619	0.461	0.525	0.833	1.714	2.145	1.274	2.243	1.56	0.698	0.448	0.945	1.735	2.339	1.466	1.101	0.79	1.706	1.156	1.49	0.691	1.2	1.398	1.321	0.741	0.656	1.034	0.713	1.256	1.21	0.829	1.913	1.046	0.675	1.147	1.379	1.063	1.095	0.619	1.657	1.1	1.154	1.06	0.762	1.217
P38606	1.27	1.077	2.051	1.628	0.622	0.476	0.514	1.012	1.886	1.856	1.209	2.13	1.483	0.649	0.396	0.983	1.878	2.323	1.404	1.16	0.813	1.851	1.264	1.553	0.707	1.268	1.669	1.266	0.729	0.65	1.003	0.736	1.304	1.217	0.816	1.912	1.071	0.702	1.196	1.48	1.107	1.15	0.677	1.709	1.244	1.186	1.047	0.798	1.322
Q02218	1.355	1.146	2.213	1.767	0.697	0.513	0.583	1.014	2.026	2.262	1.313	2.212	1.576	0.774	0.459	1.048	1.931	2.384	1.563	1.218	0.832	1.832	1.285	1.56	0.758	1.348	1.714	1.408	0.784	0.688	1.097	0.776	1.348	1.284	0.855	2.065	1.117	0.703	1.238	1.491	1.151	1.236	0.705	1.814	1.278	1.219	1.076	0.819	1.321
P49792	1.407	1.125	2.146	1.588	0.68	0.525	0.58	0.93	1.87	2.304	1.201	2.012	1.382	0.724	0.425	0.908	1.619	2.16	1.663	1.155	0.831	1.838	1.184	1.526	0.682	1.272	1.453	1.375	0.737	0.721	1.047	0.742	1.273	1.265	0.844	1.93	1.14	0.735	1.192	1.448	1.078	1.177	0.664	1.761	1.239	1.185	1.075	0.856	1.344
P00491	1.391	1.233	2.429	1.928	0.751	0.558	0.659	1.079	2.195	2.331	1.328	2.295	1.609	0.773	0.508	1.133	2.078	2.573	1.564	1.199	0.83	1.953	1.314	1.674	0.802	1.402	1.586	1.47	0.793	0.727	1.186	0.825	1.505	1.446	0.996	2.217	1.067	0.656	1.204	1.489	1.134	1.195	0.704	1.845	1.332	1.139	1.03	0.76	1.294
Q15084	1.309	1.126	2.05	1.626	0.662	0.499	0.538	0.95	1.854	2.228	1.174	1.924	1.383	0.712	0.441	0.953	1.688	2.121	1.519	1.175	0.822	1.867	1.267	1.509	0.74	1.292	1.454	1.379	0.756	0.667	1.082	0.768	1.334	1.287	0.86	1.998	1.06	0.669	1.144	1.426	1.08	1.121	0.659	1.691	1.173	1.165	1.047	0.75	1.323
P48735	1.377	1.202	2.44	1.908	0.68	0.499	0.565	1.052	2.093	2.245	1.411	2.481	1.688	0.727	0.454	1.164	2.187	2.622	1.586	1.239	0.818	1.979	1.331	1.614	0.755	1.367	1.578	1.477	0.802	0.7	1.178	0.783	1.387	1.316	0.865	2.109	1.095	0.692	1.197	1.523	1.136	1.138	0.658	1.656	1.269	1.202	1.075	0.752	1.329
Q32Q12	1.39	1.188	2.17	1.63	0.677	0.506	0.57	1.021	1.794	2.217	1.196	2.012	1.461	0.722	0.45	1.147	1.848	1.966	1.474	1.189	0.816	1.819	1.304	1.632	0.757	1.352	1.509	1.451	0.792	0.681	1.101	0.842	1.451	1.38	0.892	1.904	1.108	0.712	1.183	1.54	1.147	1.132	0.637	1.782	1.295	1.2	1.099	0.734	1.326
P14780	1.271	1.112	2.165	1.652	0.632	0.484	0.536	0.98	1.953	2.143	1.289	2.234	1.586	0.714	0.434	1.093	2.005	2.436	1.465	1.184	0.776	1.847	1.259	1.54	0.735	1.292	1.505	1.389	0.756	0.663	1.099	0.761	1.388	1.357	0.878	2.033	1.225	0.778	1.344	1.711	1.257	1.35	0.772	2.017	1.459	1.314	1.174	0.872	1.543
Q13509	1.373	1.46	2.606	2.167	0.855	0.6	0.452	1.04	2.479	1.703	1.45	2.683	1.679	0.684	0.554	1.267	2.378	2.866	1.018	1.312	0.838	1.446	1.261	1.214	0.952	1.33	0.884	1.332	0.732	0.61	0.91	0.768	1.238	1.25	0.94	1.481	1.127	0.702	1.231	1.328	1.15	1.319	0.825	1.638	1.089	1.151	1.084	0.736	1.292
Q9NZ08	1.349	1.15	2.168	1.69	0.69	0.518	0.586	1.037	1.983	1.977	1.348	2.357	1.694	0.722	0.478	1.079	2.091	2.67	1.466	1.177	0.825	1.926	1.316	1.622	0.802	1.39	1.524	1.429	0.807	0.725	1.157	0.817	1.435	1.406	0.912	2.141	1.07	0.68	1.159	1.48	1.117	1.09	0.688	1.632	1.285	1.169	1.037	0.767	1.315
P11216	1.477	1.249	2.652	2.027	0.736	0.565	0.634	1.101	2.354	2.185	1.389	2.554	1.798	0.795	0.512	1.095	2.24	2.784	1.583	1.261	0.88	1.949	1.362	1.697	0.822	1.431	1.706	1.508	0.828	0.739	1.215	0.823	1.39	1.366	0.888	2.21	1.124	0.709	1.286	1.541	1.215	1.274	0.746	1.863	1.369	1.239	1.074	0.819	1.355
P28838	1.343	1.204	2.285	1.806	0.735	0.541	0.602	1.081	2.15	2.144	1.358	2.362	1.666	0.762	0.471	1.092	2.125	2.631	1.5	1.256	0.861	2.01	1.383	1.672	0.822	1.446	1.729	1.399	0.808	0.739	1.132	0.803	1.391	1.369	0.9	2.123	1.12	0.743	1.262	1.549	1.189	1.217	0.692	1.854	1.347	1.245	1.135	0.829	1.396
P00367	1.297	1.102	2.08	1.636	0.642	0.485	0.567	0.976	1.909	2.25	1.234	2.184	1.567	0.772	0.462	1	1.851	2.383	1.625	1.187	0.808	1.838	1.263	1.537	0.717	1.28	1.472	1.381	0.757	0.676	1.108	0.763	1.327	1.287	0.876	2.037	1.087	0.68	1.191	1.476	1.119	1.125	0.662	1.756	1.293	1.167	1.05	0.755	1.286
P26599	1.289	1.029	1.956	1.526	0.645	0.507	0.525	0.934	1.849	2.021	1.095	1.86	1.311	0.663	0.43	0.943	1.617	2.078	1.531	1.107	0.792	1.758	1.158	1.466	0.704	1.237	1.375	1.315	0.757	0.661	1.043	0.711	1.3	1.26	0.835	1.919	1.083	0.656	1.195	1.421	1.087	1.218	0.688	1.823	1.183	1.156	1.073	0.788	1.337
P34897	1.2	1.027	1.987	1.511	0.587	0.451	0.526	0.89	1.768	2.187	1.135	1.968	1.406	0.696	0.421	0.94	1.73	2.127	1.467	1.117	0.753	1.754	1.179	1.42	0.676	1.213	1.347	1.334	0.736	0.622	1.032	0.732	1.256	1.226	0.821	1.884	0.964	0.623	1.067	1.301	1	1.016	0.588	1.579	1.108	1.057	0.973	0.672	1.188
P49748	1.416	1.278	2.487	1.96	0.734	0.56	0.595	1.111	2.318	2.334	1.367	2.404	1.687	0.842	0.522	1.115	2.025	2.68	1.53	1.314	0.903	2.007	1.438	1.776	0.836	1.504	1.695	1.434	0.806	0.701	1.142	0.817	1.469	1.372	0.95	2.149	1.104	0.738	1.218	1.508	1.165	1.271	0.713	1.89	1.327	1.214	1.113	0.834	1.364
P52566	1.336	1.166	2.229	1.808	0.663	0.506	0.574	1.125	1.988	2.526	1.269	2.126	1.499	0.768	0.466	1.005	1.902	2.241	1.664	1.255	0.888	2.005	1.322	1.635	0.735	1.398	1.551	1.531	0.845	0.712	1.182	0.913	1.556	1.488	1.003	2.181	1.128	0.746	1.316	1.579	1.251	1.38	0.73	2.046	1.342	1.243	1.112	0.819	1.429
E7EVA0	1.458	1.133	2.064	1.511	0.654	0.527	0.527	0.865	1.825	2.053	1.211	2.012	1.461	0.733	0.45	1.017	1.731	2.228	1.519	1.187	0.846	1.778	1.24	1.542	0.745	1.305	1.451	1.468	0.843	0.726	1.136	0.963	1.589	1.588	1.07	2.01	1.118	0.762	1.139	1.447	1.088	1.199	0.648	1.792	1.241	1.159	1.117	0.814	1.386
Q9UHB9	1.273	0.997	1.851	1.422	0.602	0.513	0.566	1.01	1.729	2.342	1.142	1.895	1.354	0.757	0.463	0.939	1.678	2.131	1.665	1.136	0.835	1.848	1.192	1.535	0.696	1.305	1.405	1.283	0.723	0.648	1.047	0.745	1.364	1.326	0.875	1.993	1.014	0.64	1.168	1.454	1.097	1.212	0.66	1.933	1.204	1.099	0.984	0.774	1.302
D3DQV9	1.33	1.108	2.155	1.582	0.626	0.536	0.567	1.003	1.904	2.222	1.214	2.197	1.579	0.769	0.461	1.051	1.839	2.412	1.423	1.17	0.828	1.901	1.249	1.589	0.784	1.407	1.551	1.443	0.786	0.696	1.179	0.846	1.413	1.453	0.936	2.11	1.07	0.671	1.108	1.473	1.077	1.143	0.652	1.701	1.302	1.165	1.023	0.728	1.264
O43143	1.251	1.077	2.083	1.629	0.644	0.475	0.525	0.934	1.903	1.945	1.287	2.178	1.549	0.677	0.427	0.986	1.881	2.362	1.416	1.167	0.803	1.823	1.244	1.533	0.73	1.316	1.546	1.3	0.735	0.656	1.04	0.729	1.265	1.214	0.824	1.887	1.049	0.655	1.126	1.407	1.032	1.062	0.642	1.545	1.195	1.164	1.036	0.775	1.293
A0A1B0GVD5	1.092	0.921	1.894	1.498	0.532	0.374	0.442	0.822	1.668	1.816	1.094	1.956	1.388	0.62	0.392	0.894	1.665	2.12	1.193	0.986	0.637	1.45	1.034	1.285	0.605	1.038	1.182	1.162	0.616	0.531	0.891	0.594	1.056	1.015	0.671	1.64	0.778	0.497	0.85	1.033	0.786	0.775	0.458	1.212	0.901	0.826	0.762	0.526	0.922
P50570	1.294	1.117	2.134	1.627	0.657	0.529	0.525	1.014	1.882	1.976	1.248	2.164	1.527	0.697	0.444	0.994	1.851	2.313	1.398	1.157	0.802	1.722	1.206	1.503	0.73	1.254	1.464	1.31	0.759	0.672	1.031	0.771	1.333	1.303	0.869	1.91	1.042	0.694	1.143	1.419	1.091	1.138	0.646	1.673	1.199	1.136	1.045	0.767	1.266
O95373	1.293	1.156	2.174	1.712	0.675	0.525	0.555	1.023	1.989	2.066	1.281	2.201	1.607	0.731	0.468	1.053	1.898	2.458	1.542	1.186	0.834	1.852	1.281	1.565	0.765	1.317	1.564	1.309	0.736	0.656	1.045	0.766	1.288	1.289	0.841	1.977	1.057	0.677	1.211	1.491	1.13	1.182	0.698	1.768	1.302	1.162	1.042	0.767	1.282
P22234	1.294	1.136	2.191	1.776	0.7	0.527	0.593	1.014	1.992	2.267	1.287	2.133	1.489	0.754	0.494	1.131	2.031	2.3	1.592	1.247	0.836	1.898	1.28	1.592	0.765	1.339	1.498	1.417	0.81	0.7	1.109	0.78	1.388	1.344	0.915	2.058	1.065	0.669	1.176	1.438	1.083	1.122	0.661	1.705	1.26	1.217	1.118	0.782	1.409
O43175	0.929	0.8	1.515	1.175	0.455	0.34	0.397	0.634	1.292	1.541	0.911	1.545	1.086	0.497	0.296	0.696	1.277	1.64	1.094	0.887	0.592	1.275	0.906	1.08	0.526	0.899	1.027	0.996	0.544	0.494	0.759	0.53	0.919	0.886	0.584	1.399	0.765	0.552	0.82	1.022	0.776	0.779	0.452	1.193	0.887	0.83	0.747	0.542	0.904
P49736	1.322	1.095	2.157	1.69	0.67	0.542	0.596	1.033	2.043	2.352	1.227	2.127	1.443	0.758	0.438	0.998	1.88	2.247	1.557	1.174	0.842	1.861	1.248	1.561	0.7	1.362	1.543	1.338	0.768	0.691	1.083	0.763	1.358	1.311	0.886	2.054	1.118	0.746	1.272	1.533	1.209	1.302	0.757	1.954	1.391	1.198	1.068	0.799	1.32
Q96QK1	1.282	1.088	2.104	1.607	0.636	0.471	0.501	0.923	1.811	1.982	1.244	2.126	1.524	0.718	0.462	0.969	1.778	2.394	1.152	1.048	0.713	1.478	1.061	1.333	0.684	1.058	1.396	1.278	0.716	0.67	0.986	0.715	1.237	1.182	0.8	1.935	0.974	0.682	1.093	1.306	1.011	1.044	0.628	1.475	1.214	0.968	0.947	0.697	1.083
J3KTA4	1.255	1.029	2.063	1.625	0.616	0.447	0.484	0.89	1.831	2.085	1.247	2.195	1.59	0.703	0.424	0.972	1.693	2.405	1.423	1.116	0.736	1.771	1.196	1.425	0.689	1.204	1.434	1.306	0.705	0.643	1.066	0.679	1.19	1.128	0.743	1.91	1.147	0.709	1.285	1.551	1.164	1.191	0.716	1.74	1.304	1.246	1.1	0.841	1.39
P16284	1.403	1.251	2.277	1.794	0.737	0.582	0.649	1.069	2.08	2.344	1.303	2.138	1.556	0.816	0.474	1.047	1.94	2.35	1.535	1.289	0.879	1.895	1.397	1.638	0.793	1.356	1.579	1.424	0.847	0.703	1.138	0.875	1.449	1.4	0.939	2.065	1.097	0.737	1.188	1.498	1.126	1.13	0.686	1.731	1.223	1.223	1.126	0.853	1.441
O94804	1.35	1.123	2.184	1.705	0.664	0.504	0.546	1.019	1.955	2.456	1.329	2.304	1.627	0.829	0.462	1.068	1.983	2.503	1.631	1.167	0.819	1.917	1.282	1.598	0.714	1.357	1.644	1.371	0.752	0.665	1.091	0.772	1.381	1.31	0.874	2.027	1.065	0.654	1.204	1.446	1.098	1.191	0.652	1.851	1.248	1.19	1.027	0.809	1.283
O95352	1.367	1.175	2.262	1.782	0.704	0.523	0.558	1.052	2.062	2.045	1.361	2.396	1.608	0.694	0.51	0.977	2.067	2.529	1.529	1.232	0.854	1.887	1.338	1.659	0.815	1.425	1.557	1.447	0.82	0.745	1.166	0.799	1.382	1.355	0.921	2.112	1.138	0.743	1.253	1.505	1.16	1.175	0.706	1.728	1.252	1.249	1.114	0.839	1.379
P23469	1.286	1.114	2.073	1.657	0.647	0.522	0.584	0.934	2.02	2.025	1.319	2.238	1.58	0.751	0.471	1.017	1.911	2.55	1.47	1.232	0.806	1.849	1.303	1.588	0.82	1.335	1.693	1.373	0.764	0.713	1.103	0.757	1.34	1.35	0.864	2.15	1.06	0.704	1.134	1.446	1.084	1.118	0.662	1.657	1.258	1.218	1.061	0.822	1.316
P55160	1.341	1.048	2.033	1.561	0.673	0.517	0.54	0.944	1.811	2.288	1.207	2.085	1.45	0.729	0.489	0.93	1.79	2.303	1.55	1.162	0.849	1.854	1.249	1.551	0.749	1.326	1.479	1.298	0.735	0.674	1.059	0.764	1.348	1.261	0.891	2.02	1.02	0.631	1.091	1.354	1.024	1.064	0.622	1.637	1.119	1.16	1.028	0.78	1.281
P51858	1.231	1.018	1.711	1.346	0.624	0.482	0.541	0.996	1.675	2.255	1.179	1.883	1.403	0.781	0.41	0.871	1.531	2.157	1.412	1.065	0.757	1.692	1.217	1.45	0.633	1.201	1.407	1.269	0.7	0.604	1.052	0.758	1.273	1.269	0.848	1.825	1.033	0.689	1.153	1.482	1.073	1.15	0.61	1.826	1.241	1.154	1.022	0.767	1.336
Q96KP4	1.357	1.142	2.26	1.733	0.685	0.541	0.585	0.979	2.038	2.194	1.216	2.147	1.539	0.732	0.449	1.026	1.951	2.365	1.432	1.165	0.824	1.8	1.276	1.549	0.735	1.308	1.455	1.367	0.774	0.673	1.079	0.769	1.352	1.29	0.847	1.95	1.059	0.675	1.168	1.404	1.067	1.11	0.655	1.638	1.192	1.177	1.028	0.762	1.293
Q8TEX9	1.384	1.26	2.49	1.871	0.752	0.573	0.606	1.104	2.241	2.375	1.462	2.632	1.913	0.897	0.567	1.22	2.278	2.912	1.407	1.246	0.853	1.95	1.352	1.725	0.859	1.41	1.764	1.465	0.858	0.778	1.183	0.889	1.504	1.424	1.044	2.193	1.117	0.735	1.22	1.511	1.175	1.252	0.772	1.795	1.329	1.218	1.129	0.842	1.346
Q13576	1.21	1.016	1.946	1.502	0.644	0.479	0.517	0.892	1.815	2.134	1.203	2.075	1.459	0.72	0.409	0.988	1.807	2.371	1.4	1.074	0.755	1.763	1.221	1.481	0.755	1.29	1.544	1.343	0.748	0.665	1.019	0.751	1.351	1.281	0.856	1.921	1.044	0.667	1.212	1.408	1.133	1.268	0.705	1.879	1.227	1.207	1.067	0.781	1.28
Q32MZ4	1.299	1.083	1.916	1.443	0.639	0.507	0.573	0.969	1.771	2.351	1.195	2.003	1.439	0.742	0.413	1.029	1.736	2.149	1.556	1.178	0.825	1.855	1.258	1.5	0.716	1.291	1.522	1.398	0.757	0.615	1.03	0.773	1.279	1.32	0.822	1.89	1.036	0.68	1.129	1.411	1.044	1.1	0.608	1.671	1.21	1.099	0.998	0.728	1.257
Q15418	1.309	1.081	2.177	1.684	0.675	0.53	0.544	1.009	1.964	2.191	1.161	2.037	1.43	0.728	0.487	0.977	1.826	2.266	1.439	1.204	0.829	1.912	1.272	1.59	0.782	1.412	1.541	1.355	0.763	0.689	1.071	0.757	1.355	1.302	0.866	2.035	1.07	0.668	1.16	1.387	1.045	1.114	0.668	1.708	1.207	1.21	1.069	0.796	1.281
P06748	1.184	0.982	1.792	1.415	0.562	0.417	0.53	0.847	1.625	2.254	1.157	1.929	1.408	0.686	0.442	0.943	1.653	2.113	1.487	1.124	0.739	1.734	1.138	1.423	0.602	1.138	1.439	1.34	0.737	0.622	1.033	0.717	1.253	1.22	0.774	1.938	1.072	0.667	1.189	1.427	1.043	1.086	0.614	1.763	1.131	1.148	1.088	0.783	1.329
O15523	1.264	1.037	2.117	1.66	0.655	0.525	0.578	0.929	1.934	2.192	1.202	2.184	1.529	0.754	0.462	1.008	1.812	2.442	1.472	1.131	0.823	1.881	1.223	1.54	0.745	1.304	1.542	1.287	0.76	0.676	1.042	0.742	1.311	1.22	0.868	1.906	1.123	0.663	1.23	1.457	1.066	1.159	0.697	1.842	1.203	1.229	1.047	0.779	1.368
E5RK69	1.413	0.988	1.686	1.174	0.897	0.672	0.615	1.122	1.888	1.991	1.118	1.825	1.279	0.809	0.54	0.907	1.614	1.979										1.279	0.535	0.565	1.039	0.882	1.355	1.283	0.884	1.939	0.864	0.665	0.976	1.167	1.087	1.092	0.564	1.58	1.083	1.107	0.981	0.798	1.281
Q13310	1.334	1.098	2.401	1.879	0.685	0.498	0.567	0.962	2.134	2.046	1.257	2.306	1.544	0.686	0.398	1.014	1.927	2.465	1.482	1.187	0.793	1.936	1.24	1.579	0.718	1.29	1.518	1.357	0.74	0.658	1.048	0.734	1.291	1.23	0.829	1.93	1.058	0.656	1.125	1.405	1.044	1.094	0.623	1.619	1.178	1.091	1.03	0.746	1.23
P63244	1.288	1.044	1.925	1.499	0.629	0.46	0.553	0.842	1.673	2.316	1.264	2.138	1.483	0.728	0.441	0.925	1.681	2.244	1.64	1.155	0.793	1.89	1.2	1.527	0.656	1.193	1.478	1.378	0.772	0.685	1.082	0.707	1.271	1.19	0.791	1.991	1.073	0.662	1.151	1.4	1.025	1.041	0.63	1.591	1.163	1.16	1.028	0.782	1.258
Q06210	1.231	1.059	1.989	1.568	0.64	0.498	0.503	0.971	1.78	2.19	1.216	1.985	1.414	0.735	0.447	0.98	1.874	2.169	1.403	1.113	0.811	1.845	1.226	1.581	0.74	1.406	1.535	1.265	0.72	0.648	1.032	0.755	1.32	1.282	0.864	1.893	1.032	0.674	1.156	1.413	1.112	1.192	0.703	1.721	1.242	1.139	1.033	0.773	1.31
P49915	1.284	1.1	2.117	1.648	0.652	0.529	0.553	0.948	1.919	2.324	1.221	2.059	1.421	0.762	0.453	0.966	1.895	2.236	1.551	1.152	0.823	1.826	1.267	1.564	0.73	1.335	1.509	1.399	0.785	0.675	1.077	0.773	1.379	1.315	0.865	2.083	1.061	0.709	1.202	1.447	1.189	1.142	0.663	1.818	1.245	1.194	1.087	0.806	1.336
Q5T6W2																												1.355	0.793	0.725	1.027	0.739	1.238	1.217	0.907	1.858	0.946	0.629	1.16	1.37	1.074	1.162	0.606	1.79	1.156	1.063	1.02	0.745	1.161
P22626	1.175	0.856	1.752	1.272	0.591	0.421	0.492	0.759	1.471	1.985	0.98	1.603	0.97	0.508	0.372	0.781	1.353	1.667	1.671	1.028	0.79	1.8	0.999	1.446	0.629	1.3	1.301	1.138	0.651	0.603	0.905	0.567	1.132	1.046	0.746	1.614	1.084	0.637	1.21	1.447	1.153	1.286	0.731	1.916	1.132	1.165	1.038	0.803	1.215
Q13177	1.304	1.132	2.282	1.76	0.674	0.486	0.539	0.976	2.02	2.124	1.227	2.227	1.545	0.726	0.427	1.01	1.805	2.419	1.572	1.2	0.813	1.877	1.334	1.583	0.717	1.312	1.506	1.42	0.779	0.704	1.106	0.779	1.331	1.29	0.856	2.031	1.03	0.656	1.1	1.364	1.037	1.025	0.608	1.577	1.159	1.149	1.052	0.759	1.281
Q9Y5B9	1.24	1.047	2.035	1.373	0.591	0.435	0.496	0.84	1.658	2.096	1.209	1.912	1.216	0.612	0.34	0.867	1.593	2.001	1.43	1.026	0.687	1.458	0.954	1.417	0.611	1.087	1.232	1.227	0.59	0.546	0.884	0.589	1.024	1.008	0.693	1.518	1.044	0.637	1.146	1.404	1.061	1.103	0.638	1.657	1.184	1.107	0.993	0.748	1.227
P14317	1.304	1.099	2.046	1.587	0.7	0.539	0.614	0.931	1.905	2.359	1.22	1.95	1.416	0.791	0.459	1.068	1.77	2.24	1.655	1.195	0.861	1.919	1.261	1.56	0.681	1.3	1.481	1.414	0.781	0.666	1.09	0.82	1.443	1.357	0.89	1.99	1.084	0.682	1.162	1.457	1.081	1.167	0.618	1.852	1.204	1.155	1.056	0.788	1.351
O00571	1.309	1.03	2.084	1.658	0.64	0.531	0.605	0.974	1.931	1.862	1.013	1.926	1.358	0.665	0.449	0.907	1.595	2.192	1.532	1.137	0.804	1.894	1.271	1.523	0.697	1.337	1.712	1.357	0.816	0.701	1.098	0.763	1.34	1.4	0.892	2.02	1.021	0.579	1.134	1.315	0.996	0.994	0.67	1.682	1.143	1.233	0.984	0.758	1.459
O76094	1.326	1.083	2.053	1.614	0.642	0.488	0.529	0.934	1.817	2.09	1.215	2.125	1.532	0.717	0.416	0.983	1.795	2.341	1.424	1.139	0.783	1.776	1.21	1.501	0.736	1.287	1.447	1.327	0.733	0.666	1.059	0.795	1.371	1.358	0.893	1.934	1.017	0.641	1.122	1.398	1.072	1.157	0.658	1.732	1.201	1.154	1.05	0.763	1.348
Q96G03	1.293	1.135	2.098	1.629	0.653	0.494	0.534	0.986	1.827	2.044	1.248	2.088	1.459	0.689	0.447	1.001	1.85	2.244	1.402	1.216	0.817	1.771	1.242	1.493	0.727	1.292	1.473	1.354	0.758	0.674	1.064	0.776	1.349	1.308	0.857	1.948	1.041	0.699	1.158	1.396	1.098	1.116	0.663	1.699	1.206	1.158	1.044	0.782	1.279
Q9UQE7	1.284	1.096	2.06	1.609	0.658	0.549	0.525	0.946	1.933	2.23	1.141	1.92	1.334	0.733	0.461	0.966	1.829	2.149	1.316	1.134	0.781	1.687	1.181	1.501	0.721	1.356	1.478	1.264	0.744	0.633	0.982	0.737	1.318	1.305	0.878	1.961	1.044	0.656	1.149	1.409	1.069	1.21	0.672	1.787	1.236	1.15	1.041	0.805	1.296
Q16531	1.277	1.136	2.077	1.648	0.667	0.509	0.502	0.992	1.904	1.978	1.238	2.119	1.511	0.715	0.463	0.95	1.842	2.368	1.372	1.238	0.847	1.919	1.316	1.745	0.831	1.439	1.657	1.401	0.815	0.71	1.123	0.828	1.483	1.41	0.947	2.192	1.091	0.696	1.236	1.499	1.151	1.262	0.74	1.805	1.336	1.179	1.088	0.819	1.317
Q14240	1.443	1.214	2.212	1.737	0.766	0.607	0.672	1.044	2.097	2.021	1.345	2.424	1.767	0.711	0.453	1.11	2.265	2.624	1.55	1.159	0.808	1.801	1.253	1.493	0.732	1.307	1.445	1.404	0.774	0.706	1.074	0.794	1.411	1.359	0.91	1.979	1.079	0.701	1.196	1.497	1.159	1.213	0.707	1.776	1.27	1.193	1.058	0.804	1.335
A0A1W2PQ51	1.23	0.99	1.99	1.561	0.578	0.44	0.486	0.892	1.777	1.88	1.199	2.189	1.533	0.62	0.403	0.953	1.89	2.374	1.467	1.103	0.737	1.753	1.141	1.453	0.656	1.221	1.471	1.265	0.692	0.614	1.026	0.673	1.217	1.16	0.802	1.895	1.086	0.667	1.227	1.5	1.081	1.101	0.664	1.701	1.204	1.187	1.041	0.788	1.328
P43304	1.302	1.104	2.064	1.619	0.686	0.535	0.554	0.961	1.883	2.11	1.234	2.081	1.462	0.747	0.49	0.973	1.818	2.328	1.454	1.188	0.812	1.798	1.282	1.559	0.765	1.353	1.393	1.34	0.768	0.666	1.069	0.779	1.389	1.345	0.915	2.05	1.017	0.619	1.103	1.426	1.091	1.134	0.62	1.621	1.163	1.115	1.022	0.774	1.272
P48444	1.28	1.082	2.15	1.657	0.63	0.501	0.534	0.991	1.969	2.101	1.241	2.137	1.51	0.697	0.44	1.027	1.912	2.343	1.494	1.172	0.809	1.878	1.25	1.588	0.74	1.358	1.581	1.346	0.738	0.675	1.068	0.758	1.365	1.319	0.885	1.93	1.067	0.662	1.185	1.408	1.093	1.18	0.673	1.752	1.224	1.139	1.023	0.762	1.278
O43242	1.208	1.041	1.987	1.556	0.637	0.493	0.532	0.869	1.813	2.138	1.248	2.177	1.478	0.741	0.46	0.878	1.658	2.281	1.468	1.119	0.791	1.72	1.176	1.408	0.683	1.196	1.322	1.275	0.741	0.655	0.985	0.742	1.31	1.264	0.849	1.909	1.025	0.671	1.167	1.354	1.064	1.16	0.668	1.689	1.208	1.135	1.02	0.787	1.251
P31146	1.241	1.023	1.891	1.483	0.595	0.439	0.531	0.827	1.652	2.203	1.222	2.038	1.441	0.728	0.44	0.899	1.664	2.167	1.532	1.133	0.795	1.849	1.199	1.509	0.675	1.255	1.428	1.338	0.742	0.67	1.052	0.732	1.288	1.221	0.831	1.944	1.019	0.643	1.138	1.415	1.021	1.097	0.606	1.697	1.169	1.111	0.986	0.736	1.231
P47897	1.312	1.098	2.102	1.582	0.642	0.508	0.593	1.004	1.895	2.257	1.35	2.36	1.661	0.775	0.479	1.047	2.164	2.582	1.476	1.175	0.791	1.845	1.246	1.622	0.752	1.288	1.618	1.296	0.744	0.688	1.08	0.762	1.374	1.285	0.867	2	1.029	0.651	1.169	1.463	1.093	1.144	0.666	1.68	1.264	1.18	1.021	0.795	1.311
O00299	1.291	1.141	2.034	1.583	0.641	0.486	0.533	0.927	1.754	2.212	1.245	2.111	1.494	0.719	0.446	0.908	1.688	2.235	1.462	1.195	0.816	1.729	1.238	1.455	0.718	1.215	1.39	1.412	0.757	0.662	1.07	0.757	1.303	1.283	0.851	1.971	1.047	0.636	1.136	1.384	1.047	1.068	0.601	1.601	1.157	1.129	1.04	0.723	1.239
P11940	1.348	1.159	2.169	1.738	0.717	0.532	0.609	1.023	2.004	2.335	1.296	2.227	1.589	0.831	0.486	1.048	1.895	2.477	1.58	1.205	0.865	1.988	1.276	1.622	0.775	1.372	1.49	1.302	0.757	0.662	1.118	0.755	1.373	1.286	0.865	1.971	1.037	0.655	1.142	1.367	1.011	1.161	0.598	1.863	1.155	1.116	1.021	0.783	1.277
P27708	1.394	1.168	2.358	1.832	0.717	0.551	0.584	1.055	2.171	2.04	1.214	2.103	1.508	0.673	0.446	0.981	1.966	2.369	1.486	1.215	0.835	1.922	1.275	1.68	0.758	1.435	1.581	1.323	0.757	0.684	1.037	0.782	1.387	1.338	0.905	1.977	1.063	0.71	1.206	1.506	1.174	1.192	0.754	1.801	1.323	1.17	1.092	0.8	1.307
P62258	1.272	1.11	2.13	1.679	0.654	0.456	0.54	0.971	1.902	2.197	1.321	2.314	1.612	0.753	0.43	1.072	1.897	2.427	1.475	1.146	0.764	1.679	1.23	1.477	0.687	1.212	1.403	1.285	0.715	0.635	1.012	0.716	1.203	1.132	0.761	1.801	1.032	0.715	1.128	1.424	1.057	1.07	0.643	1.641	1.202	1.124	1.045	0.785	1.272
P17980	1.27	1.094	2.233	1.73	0.638	0.472	0.533	0.959	2.012	2.1	1.212	2.191	1.53	0.686	0.406	1.031	1.93	2.387	1.524	1.171	0.765	1.799	1.25	1.503	0.692	1.25	1.49	1.331	0.725	0.663	1.062	0.743	1.321	1.256	0.841	1.966	1.015	0.652	1.103	1.361	1.025	1.057	0.62	1.601	1.175	1.124	1.024	0.733	1.242
P50454	1.29	1.015	2.028	1.575	0.596	0.477	0.522	1.02	1.834	2.189	1.206	2.061	1.498	0.755	0.44	0.985	1.886	2.273	1.504	1.134	0.796	1.783	1.224	1.496	0.716	1.31	1.426	1.33	0.747	0.65	1.037	0.746	1.308	1.269	0.845	1.936	1.042	0.658	1.157	1.399	1.059	1.154	0.661	1.689	1.21	1.137	0.985	0.725	1.261
Q15067	1.487	1.246	2.536	1.919	0.764	0.553	0.577	1.119	2.16	2.371	1.435	2.532	1.726	0.804	0.505	1.119	2.252	2.646	1.626	1.264	0.933	2.11	1.411	1.773	0.84	1.531	1.657	1.558	0.854	0.758	1.225	0.917	1.557	1.51	1.022	2.262	1.175	0.751	1.302	1.634	1.272	1.301	0.792	1.93	1.391	1.282	1.141	0.851	1.402
P61981	1.2	0.988	1.793	1.392	0.587	0.428	0.5	0.846	1.574	2.034	1.182	1.903	1.321	0.668	0.393	0.906	1.544	2.01	1.47	1.146	0.753	1.701	1.202	1.404	0.641	1.169	1.302	1.325	0.731	0.634	1.01	0.728	1.226	1.195	0.802	1.756	1.044	0.703	1.103	1.379	1.046	1.049	0.613	1.6	1.129	1.129	1.008	0.734	1.234
P37802	2.886	1.862	4.942	1.984	0.913	0.625	0.708	1.552	2.7	2.449	1.009	2.632	1.895	0.69	0.371	1.743	1.337	1.615	2.689	1.335	1.04	3.517	1.894	2.884	0.973	2.383	2.121	2.356	1.294	0.887	0.993	0.996	2.204	2.382	1.03	2.063	1.637	0.919	0.986	2.311	1.076	0.95	0.777	1.69	1.678	1.371	1.295	0.818	1.275
P04899	1.273	1.05	2.128	1.663	0.609	0.471	0.514	1.007	1.89	2.06	1.055	1.731	1.253	0.612	0.415	0.892	1.625	1.954	1.51	1.156	0.798	1.803	1.222	1.508	0.707	1.311	1.38	1.302	0.727	0.649	1.023	0.71	1.259	1.233	0.815	1.774	1.077	0.689	1.181	1.454	1.132	1.127	0.689	1.764	1.195	1.171	1.07	0.799	1.313
P21796	1.111	1.033	1.812	1.482	0.609	0.441	0.518	0.771	1.731	2.064	1.094	1.821	1.3	0.671	0.423	0.796	1.417	2.066	1.376	1.048	0.687	1.759	1.144	1.332	0.615	1.048	1.346	1.229	0.713	0.612	1	0.67	1.149	1.144	0.728	1.859	0.897	0.576	0.908	1.177	0.86	0.97	0.554	1.477	0.987	0.964	0.825	0.624	1.098
P67809	1.223	0.983	1.614	1.251	0.703	0.561	0.617	0.86	1.6	2.391	0.95	1.415	1.015	0.684	0.383	0.845	1.328	1.671	1.576	1.117	0.895	1.925	1.209	1.542	0.659	1.269	1.168	1.37	0.805	0.677	1.104	0.85	1.488	1.523	0.953	1.904	0.968	0.649	1.114	1.468	1.059	1.15	0.622	1.921	1.029	1.13	1.023	0.693	1.278
P28331	1.324	1.189	2.264	1.745	0.713	0.541	0.587	1.084	2.085	1.721	1.246	2.115	1.482	0.625	0.391	1.025	1.912	2.369	1.429	1.215	0.855	1.884	1.314	1.58	0.823	1.412	1.501	1.36	0.786	0.704	1.081	0.836	1.425	1.378	0.952	2.052	1.033	0.675	1.201	1.405	1.105	1.143	0.689	1.642	1.237	1.143	1.053	0.817	1.296
P45974	1.324	1.159	2.315	1.839	0.705	0.536	0.611	1.089	2.16	2.167	1.229	2.214	1.566	0.732	0.441	1.044	1.892	2.411	1.526	1.185	0.818	1.866	1.295	1.609	0.766	1.401	1.518	1.39	0.816	0.689	1.1	0.822	1.483	1.434	0.962	2.14	1.113	0.68	1.245	1.52	1.174	1.297	0.747	1.953	1.337	1.218	1.119	0.809	1.41
P54578	1.289	1.125	2.183	1.726	0.676	0.545	0.614	1.061	2.025	2.002	1.203	2.044	1.454	0.706	0.431	1.043	1.925	2.354	1.469	1.14	0.807	1.812	1.243	1.508	0.725	1.276	1.392	1.317	0.75	0.645	1.071	0.761	1.311	1.276	0.848	1.938	1.015	0.67	1.127	1.374	1.069	1.106	0.641	1.698	1.155	1.189	1.047	0.758	1.381
Q14980	1.326	1.114	2.103	1.558	0.701	0.588	0.623	0.97	1.991	2.359	1.221	2.003	1.411	0.782	0.498	0.95	1.722	2.234	1.586	1.204	0.9	1.949	1.258	1.628	0.746	1.399	1.577	1.265	0.752	0.673	1.052	0.755	1.369	1.346	0.909	1.979	1.051	0.703	1.28	1.442	1.12	1.312	0.713	2.017	1.281	1.188	1.088	0.864	1.362
Q99613	1.296	1.152	2.202	1.735	0.682	0.496	0.529	0.968	1.931	2.152	1.268	2.115	1.521	0.736	0.458	1.031	1.924	2.337	1.611	1.204	0.831	1.883	1.263	1.56	0.754	1.339	1.525	1.375	0.78	0.694	1.103	0.75	1.333	1.302	0.855	1.973	1.112	0.709	1.231	1.489	1.134	1.189	0.706	1.809	1.271	1.201	1.074	0.83	1.344
Q96TA1	1.35	1.168	2.2	1.688	0.69	0.557	0.606	1.094	2.038	1.995	1.185	2.065	1.503	0.703	0.441	0.967	1.829	2.312	1.456	1.227	0.792	1.795	1.275	1.518	0.718	1.301	1.527	1.381	0.767	0.674	1.118	0.786	1.37	1.324	0.893	2.044	1.038	0.671	1.101	1.416	1.047	1.072	0.577	1.62	1.18	1.161	1.044	0.726	1.288
E9PK25	1.24	1.032	2.042	1.6	0.62	0.439	0.504	0.881	1.722	2.179	1.394	2.356	1.639	0.734	0.452	1.02	1.858	2.443	1.551	1.137	0.78	1.707	1.2	1.41	0.627	1.107	1.367	1.3	0.759	0.665	1.003	0.695	1.213	1.111	0.77	1.735	1.025	0.669	1.1	1.302	1.005	1.026	0.615	1.556	1.079	1.122	1.016	0.781	1.17
P50552	1.269	1.028	2.045	1.584	0.583	0.447	0.516	0.981	1.739	2.448	1.273	2.113	1.398	0.739	0.452	1.016	1.924	2.16	1.626	1.182	0.846	2.001	1.264	1.62	0.693	1.375	1.64	1.442	0.768	0.695	1.134	0.804	1.454	1.401	0.906	2.052	1.055	0.66	1.153	1.456	1.083	1.17	0.63	1.772	1.197	1.137	1.008	0.762	1.276
P12270	1.277	1.073	1.991	1.523	0.669	0.54	0.562	0.957	1.882	2.168	1.186	2.076	1.42	0.713	0.459	1.022	1.778	2.165	1.529	1.125	0.828	1.774	1.197	1.564	0.699	1.281	1.456	1.295	0.733	0.673	1.033	0.72	1.337	1.284	0.859	1.879	1.102	0.668	1.087	1.443	1.1	1.27	0.661	1.902	1.314	1.184	1.062	0.824	1.311
Q05639	1.488	1.325	2.503	1.901	0.733	0.634	0.61	1.133	2.267	1.445	1.335	2.177	1.418	0.473	0.29	0.722	1.938	2.59	1.028	1	0.816	1.768	1.193	1.498	0.672	1.517	1.644	1.539	0.776	0.675	1.096	0.775	1.411	1.644	1.153	2.155	1.359	0.885	1.539	1.794	1.269	1.504	0.906	1.947	1.3
P42224	1.641	1.425	2.968	2.315	0.85	0.607	0.676	1.223	2.622	2.634	1.615	2.922	2.07	0.914	0.574	1.244	2.415	3.19	1.888	1.464	1.006	2.295	1.584	1.964	0.936	1.69	1.955	1.694	0.952	0.861	1.379	0.972	1.671	1.622	1.051	2.55	1.239	0.786	1.329	1.587	1.266	1.315	0.781	1.986	1.458	1.309	1.164	0.878	1.445
P11413	1.304	1.104	2.158	1.698	0.664	0.496	0.548	0.916	1.911	2.109	1.338	2.275	1.579	0.708	0.453	0.985	1.994	2.439	1.508	1.153	0.767	1.808	1.243	1.521	0.707	1.279	1.456	1.347	0.743	0.672	1.081	0.755	1.327	1.265	0.856	1.942	1.063	0.648	1.159	1.425	1.103	1.163	0.671	1.696	1.212	1.148	1.017	0.751	1.255
Q92973	1.319	1.089	2.063	1.628	0.62	0.496	0.509	1.07	1.936	1.89	1.235	2.125	1.578	0.673	0.454	1.057	2	2.398	1.417	1.183	0.782	1.807	1.279	1.567	0.758	1.293	1.569	1.384	0.782	0.692	1.088	0.818	1.43	1.389	0.928	2.106	0.964	0.63	1.087	1.379	1.036	1.041	0.635	1.485	1.194	1.191	1.069	0.753	1.376
Q16891	1.282	1.133	2.045	1.671	0.665	0.509	0.551	0.932	1.941	2.092	1.156	1.903	1.384	0.703	0.42	0.9	1.529	2.164	1.453	1.126	0.747	1.744	1.158	1.372	0.665	1.171	1.366	1.235	0.726	0.617	1.003	0.686	1.211	1.22	0.774	1.889	0.962	0.625	0.967	1.229	0.929	0.985	0.564	1.486	1.099	1.063	0.921	0.663	1.165
P33992	1.382	1.177	2.352	1.859	0.718	0.575	0.615	1.044	2.206	2.243	1.291	2.273	1.56	0.753	0.509	1.023	1.962	2.557	1.571	1.181	0.865	1.947	1.261	1.606	0.774	1.353	1.584	1.403	0.786	0.71	1.141	0.822	1.462	1.405	0.94	2.155	1.066	0.698	1.232	1.452	1.141	1.261	0.751	1.867	1.282	1.138	1.046	0.808	1.288
Q14566	1.295	1.107	2.129	1.669	0.677	0.522	0.567	1.007	1.956	2.247	1.218	1.997	1.397	0.741	0.467	1.065	1.852	2.232	1.448	1.21	0.856	1.896	1.26	1.618	0.766	1.442	1.612	1.279	0.75	0.649	1.03	0.765	1.37	1.314	0.893	1.978	1.073	0.685	1.256	1.519	1.185	1.279	0.746	1.933	1.338	1.16	1.043	0.803	1.318
O14617	1.309	1.135	2.32	1.769	0.67	0.534	0.539	1.083	2.115	2.011	1.321	2.315	1.627	0.771	0.487	1.072	2.188	2.593	1.485	1.208	0.839	1.898	1.275	1.654	0.784	1.393	1.62	1.323	0.8	0.702	1.085	0.791	1.393	1.308	0.91	2.064	1.035	0.665	1.099	1.318	1.031	1.137	0.693	1.59	1.211	1.159	1.046	0.781	1.287
B2R5W2	1.157	0.905	1.852	1.377	0.572	0.41	0.452	0.804	1.599	1.892	1.093	1.962	1.284	0.536	0.337	0.807	1.545	1.984	1.219	0.974	0.683	1.56	1.022	1.327	0.629	1.124	1.28	1.178	0.65	0.55	0.921	0.583	1.084	1.066	0.704	1.571	1.036	0.629	1.111	1.318	1.092	1.078	0.62	1.51	1.02	1.169	1.134	0.809	1.175
O60271	1.308	1.072	1.992	1.536	0.655	0.515	0.586	0.953	1.824	2.381	1.207	2.065	1.475	0.784	0.453	0.985	1.856	2.301	1.491	1.205	0.877	1.905	1.336	1.604	0.744	1.402	1.511	1.335	0.761	0.653	1.077	0.779	1.376	1.344	0.899	1.999	1.052	0.695	1.144	1.427	1.09	1.122	0.635	1.726	1.193	1.166	1.054	0.787	1.332
O43390	1.251	1.058	2.202	1.651	0.654	0.509	0.561	0.965	1.966	2.284	1.184	2.158	1.483	0.698	0.424	0.927	1.82	2.243	1.491	1.063	0.754	1.661	1.107	1.403	0.654	1.149	1.368	1.302	0.721	0.618	1.022	0.7	1.281	1.213	0.811	1.92	1.07	0.667	1.206	1.418	1.165	1.158	0.67	1.739	1.203	1.149	1.042	0.77	1.23
G8JLD5	1.386	1.19	2.336	1.816	0.707	0.527	0.553	1.026	2.205	1.815	1.328	2.386	1.678	0.695	0.458	1.078	2.085	2.624	1.486	1.29	0.891	1.855	1.293	1.644	0.831	1.348	1.524	1.329	0.764	0.668	1.06	0.774	1.392	1.352	0.91	2.008	0.985	0.651	1.079	1.312	0.999	1.097	0.629	1.637	1.164	1.16	1.064	0.822	1.297
P08240	1.337	1.135	2.233	1.757	0.669	0.525	0.566	1.015	2.077	2.084	1.238	2.149	1.482	0.678	0.411	0.994	1.915	2.36	1.537	1.171	0.789	1.86	1.245	1.557	0.719	1.32	1.543	1.4	0.777	0.691	1.087	0.786	1.404	1.333	0.899	2.003	1.064	0.667	1.156	1.444	1.105	1.148	0.663	1.748	1.272	1.171	1.041	0.789	1.329
P07954	1.286	1.126	2.16	1.686	0.67	0.516	0.529	0.984	1.945	2.092	1.243	2.077	1.498	0.728	0.437	0.976	1.821	2.313	1.475	1.165	0.816	1.815	1.242	1.567	0.733	1.318	1.548	1.314	0.727	0.657	1.021	0.761	1.286	1.241	0.861	1.915	1.05	0.692	1.153	1.408	1.089	1.164	0.683	1.745	1.225	1.139	1.048	0.792	1.291
P55265	1.229	0.999	1.92	1.506	0.635	0.488	0.505	0.866	1.743	2.112	1.195	2.111	1.501	0.676	0.424	1.026	1.854	2.308	1.521	1.142	0.798	1.882	1.246	1.578	0.725	1.322	1.566	1.315	0.749	0.653	1.057	0.733	1.3	1.259	0.839	1.916	1.073	0.685	1.18	1.428	1.089	1.167	0.666	1.771	1.184	1.179	1.089	0.788	1.308
P61160	1.276	1.08	2.22	1.74	0.62	0.455	0.543	0.979	1.917	2.192	1.344	2.376	1.587	0.724	0.432	1.061	2.099	2.484	1.619	1.187	0.785	1.918	1.254	1.643	0.688	1.311	1.689	1.354	0.729	0.656	1.064	0.717	1.335	1.215	0.822	1.999	1.1	0.69	1.186	1.507	1.122	1.197	0.674	1.753	1.316	1.165	1.027	0.8	1.304
P51149	1.36	1.179	2.292	1.851	0.694	0.533	0.607	1.099	2.123	2.272	1.244	2.27	1.585	0.749	0.465	1.04	2.097	2.524	1.593	1.247	0.826	1.975	1.288	1.649	0.767	1.383	1.637	1.441	0.771	0.665	1.115	0.778	1.426	1.359	0.921	2.101	1.094	0.652	1.223	1.47	1.092	1.202	0.693	1.851	1.3	1.216	1.068	0.788	1.381
A5YKK6	1.365	1.185	2.237	1.696	0.699	0.572	0.571	1.074	2.051	1.816	1.204	2.065	1.514	0.661	0.448	1.062	1.892	2.269	1.42	1.246	0.876	1.906	1.365	1.697	0.883	1.506	1.657	1.306	0.759	0.705	1.044	0.761	1.392	1.352	0.967	1.956	1.062	0.713	1.177	1.439	1.168	1.168	0.752	1.708	1.262	1.163	1.095	0.786	1.369
P14866	1.197	0.91	1.856	1.349	0.578	0.407	0.511	0.834	1.649	2.164	1.116	1.923	1.274	0.612	0.383	0.891	1.585	2.077	1.41	1.073	0.737	1.821	1.09	1.517	0.677	1.265	1.464	1.314	0.717	0.623	1.015	0.675	1.278	1.246	0.819	1.876	1.07	0.676	1.229	1.532	1.142	1.204	0.659	1.851	1.225	1.16	1.085	0.76	1.33
Q9UBT2	1.285	1.12	2.096	1.648	0.654	0.494	0.543	0.919	1.937	2.064	1.182	2.023	1.433	0.711	0.42	0.905	1.689	2.194	1.38	1.102	0.76	1.709	1.184	1.41	0.697	1.211	1.367	1.312	0.714	0.654	1.027	0.73	1.267	1.228	0.814	1.904	1.031	0.684	1.119	1.355	1.065	1.071	0.631	1.586	1.158	1.153	1.019	0.753	1.26
Q06323	1.712	1.338	2.923	1.882	0.669	0.505	0.667	1.071	2.204	2.592	1.354	2.539	1.737	0.899	0.471	1.15	1.842	2.184	1.66	1.125	0.82	1.607	1.233	1.542	0.641	1.227	1.325	1.637	0.76	0.719	0.989	0.861	1.401	1.28	0.853	1.991	1.245	0.766	0.946	1.497	1.051	1.03	0.539	1.719	1.274	1.287	1.143	0.733	1.448
O75534	1.349	1.124	2.098	1.588	0.656	0.543	0.603	0.953	1.97	2.516	1.234	2.077	1.479	0.818	0.495	0.974	1.789	2.379	1.612	1.258	0.903	1.982	1.321	1.681	0.802	1.463	1.644	1.42	0.786	0.706	1.1	0.756	1.383	1.331	0.918	2.037	1.114	0.7	1.213	1.421	1.105	1.182	0.693	1.809	1.234	1.205	1.104	0.867	1.358
P55884	1.355	1.16	2.375	1.886	0.702	0.524	0.58	1.081	2.183	2.155	1.293	2.292	1.58	0.731	0.452	1.034	1.952	2.501	1.548	1.208	0.833	1.959	1.328	1.655	0.762	1.386	1.687	1.336	0.76	0.664	1.075	0.728	1.307	1.252	0.822	1.993	1.111	0.709	1.257	1.534	1.139	1.208	0.726	1.874	1.304	1.227	1.08	0.803	1.391
Q15046	1.256	1.06	2.111	1.642	0.624	0.471	0.507	0.934	1.831	1.994	1.263	2.287	1.565	0.672	0.423	0.987	1.9	2.406	1.448	1.131	0.77	1.787	1.242	1.513	0.709	1.269	1.446	1.286	0.705	0.659	1.006	0.722	1.246	1.196	0.792	1.868	1.039	0.656	1.124	1.408	1.045	1.097	0.637	1.622	1.181	1.101	1.021	0.739	1.201
P33991	1.344	1.128	2.157	1.723	0.671	0.509	0.516	0.982	1.971	2.024	1.34	2.286	1.581	0.668	0.448	1.026	2.017	2.488	1.561	1.23	0.863	1.94	1.312	1.583	0.763	1.46	1.562	1.398	0.78	0.7	1.089	0.775	1.349	1.301	0.868	2.001	1.086	0.666	1.222	1.468	1.135	1.233	0.733	1.81	1.34	1.208	1.084	0.842	1.387
P31040	1.373	1.176	2.271	1.761	0.719	0.543	0.6	1.114	2.072	2.188	1.258	2.052	1.475	0.722	0.436	1.062	1.976	2.281	1.596	1.203	0.859	2.045	1.368	1.665	0.773	1.513	1.734	1.381	0.768	0.712	1.151	0.814	1.423	1.371	0.927	2.085	1.143	0.725	1.3	1.63	1.253	1.313	0.772	2.011	1.408	1.217	1.101	0.854	1.392
P15144	1.528	1.288	2.436	2.033	0.778	0.608	0.637	1.264	2.392	2.416	1.423	2.347	1.757	0.856	0.519	1.234	2.364	2.773	1.457	1.34	0.89	2.036	1.522	1.758	0.869	1.582	1.867	1.6	0.913	0.796	1.287	0.943	1.685	1.602	1.055	2.521	1.254	0.793	1.367	1.809	1.361	1.341	0.781	2.033	1.537	1.3	1.238	0.887	1.513
M0R0P8	1.27	1.065	1.938	1.49	0.659	0.566	0.592	0.922	1.847	2.28	1.153	1.982	1.357	0.782	0.475	1.015	1.766	2.245	1.495	1.136	0.851	1.848	1.238	1.54	0.733	1.338	1.472	1.311	0.736	0.655	1.005	0.765	1.254	1.218	0.807	1.858	1.059	0.67	1.193	1.449	1.084	1.228	0.701	1.867	1.206	1.16	0.999	0.776	1.264
B1AK88	1.298	1.118	2.074	1.632	0.672	0.503	0.571	0.97	1.916	2.16	1.198	1.939	1.392	0.71	0.436	1.033	1.839	2.195	1.554	1.203	0.82	1.948	1.263	1.622	0.717	1.354	1.566	1.388	0.75	0.656	1.081	0.769	1.34	1.303	0.874	2.006	1.048	0.666	1.166	1.432	1.074	1.151	0.646	1.743	1.205	1.105	1.01	0.751	1.27
P61221	1.353	1.109	2.204	1.729	0.657	0.498	0.528	1.049	1.981	1.964	1.285	2.341	1.637	0.696	0.457	1.019	2.065	2.499	1.438	1.212	0.801	1.809	1.268	1.536	0.783	1.351	1.523	1.377	0.771	0.693	1.108	0.801	1.403	1.374	0.918	2.034	1.05	0.679	1.189	1.414	1.123	1.191	0.694	1.765	1.249	1.167	1.066	0.805	1.28
P51659	1.338	1.144	2.358	1.858	0.684	0.523	0.538	1.067	2.22	1.909	1.265	2.203	1.575	0.654	0.411	0.977	1.903	2.466	1.429	1.184	0.867	1.915	1.316	1.606	0.769	1.408	1.56	1.338	0.78	0.673	1.06	0.785	1.404	1.336	0.958	1.969	1.039	0.655	1.139	1.345	1.054	1.14	0.674	1.7	1.187	1.124	1.001	0.746	1.234
P04083	1.544	1.332	2.505	2.034	0.771	0.553	0.574	1.171	2.217	2.123	1.427	2.473	1.829	0.77	0.445	1.16	2.227	2.799	1.542	1.288	0.894	1.927	1.413	1.65	0.805	1.435	1.616	1.556	0.858	0.75	1.238	0.888	1.52	1.457	1.001	2.185	1.168	0.753	1.278	1.625	1.229	1.19	0.679	1.828	1.366	1.255	1.179	0.828	1.399
P12081	1.335	1.124	2.222	1.739	0.647	0.489	0.513	0.973	1.953	1.922	1.238	2.225	1.578	0.695	0.439	1.004	1.861	2.409	1.483	1.187	0.798	1.8	1.253	1.49	0.724	1.306	1.53	1.375	0.78	0.679	1.085	0.766	1.308	1.28	0.86	2.069	1.051	0.677	1.158	1.411	1.096	1.1	0.691	1.586	1.243	1.165	1.031	0.773	1.23
K7ELL7	1.307	1.132	2.096	1.647	0.641	0.492	0.567	1.049	1.872	2.391	1.325	2.253	1.6	0.817	0.473	1.083	1.905	2.405	1.624	1.158	0.808	1.814	1.237	1.56	0.671	1.26	1.577	1.401	0.776	0.667	1.117	0.783	1.399	1.321	0.876	2.096	1.065	0.692	1.155	1.516	1.095	1.133	0.604	1.765	1.293	1.191	1.073	0.79	1.331
A0A2R8Y5S7	1.251	1.004	1.965	1.494	0.576	0.477	0.505	0.888	1.832	2.149	1.211	2.051	1.387	0.772	0.46	0.901	1.736	2.303	1.324	0.963	0.78	1.598	1.114	1.327	0.638	1.163	1.309	1.32	0.758	0.696	1.053	0.814	1.363	1.359	0.874	1.975	0.988	0.646	1.067	1.264	0.999	1.089	0.619	1.612	1.088	1.14	1.015	0.786	1.281
Q15365	1.207	0.98	1.782	1.389	0.581	0.45	0.553	0.783	1.611	2.073	1.139	1.894	1.283	0.672	0.436	0.814	1.426	2.019	1.597	1.139	0.771	1.765	1.119	1.425	0.656	1.167	1.331	1.279	0.697	0.628	0.964	0.659	1.203	1.149	0.768	1.804	1.058	0.687	1.116	1.352	0.987	1.078	0.606	1.732	1.121	1.108	1.024	0.801	1.221
Q9Y262	1.331	1.136	2.199	1.711	0.695	0.527	0.571	0.946	1.982	2.204	1.229	2.148	1.497	0.764	0.475	0.995	1.834	2.367	1.63	1.165	0.806	1.78	1.23	1.525	0.738	1.293	1.41	1.352	0.76	0.694	1.065	0.738	1.315	1.273	0.862	1.97	1.084	0.693	1.213	1.45	1.103	1.161	0.702	1.737	1.224	1.174	1.059	0.806	1.279
Q92945	1.435	1.209	2.524	1.805	0.728	0.568	0.611	1.167	2.189	2.443	1.233	2.114	1.499	0.814	0.507	1.184	1.859	2.185	1.518	1.154	0.83	1.743	1.247	1.582	0.724	1.36	1.562	1.435	0.813	0.712	1.037	0.854	1.508	1.411	0.946	2.028	1.247	0.789	1.212	1.641	1.261	1.291	0.674	2.002	1.425	1.307	1.195	0.791	1.413
O00231	1.297	1.065	1.899	1.494	0.607	0.435	0.477	0.858	1.671	1.887	1.199	1.947	1.41	0.654	0.402	0.88	1.604	2.134	1.377	1.153	0.791	1.772	1.304	1.508	0.777	1.312	1.398	1.348	0.732	0.676	1.028	0.75	1.255	1.226	0.815	1.9	1.069	0.695	1.156	1.405	1.071	1.076	0.651	1.549	1.173	1.124	1.054	0.772	1.267
P17655	1.427	1.245	2.485	1.972	0.742	0.569	0.633	1.138	2.294	2.138	1.272	2.317	1.582	0.774	0.491	1.062	2.051	2.618	1.49	1.228	0.859	1.942	1.362	1.622	0.808	1.457	1.576	1.538	0.819	0.71	1.195	0.854	1.504	1.444	0.979	2.165	1.155	0.71	1.263	1.623	1.235	1.272	0.755	1.906	1.394	1.222	1.105	0.841	1.408
P52907	1.27	1.135	2.137	1.701	0.662	0.519	0.594	1.053	2.005	2.304	1.248	2.131	1.519	0.77	0.439	1.078	1.974	2.327	1.554	1.208	0.834	1.848	1.289	1.61	0.757	1.388	1.593	1.314	0.783	0.685	1.076	0.786	1.388	1.346	0.897	1.996	1.056	0.709	1.192	1.45	1.122	1.159	0.698	1.695	1.222	1.224	1.089	0.81	1.378
P39023	1.293	1.074	2.061	1.615	0.653	0.511	0.555	0.936	1.831	2.175	1.188	2.042	1.402	0.692	0.421	1.021	1.811	2.231	1.519	1.196	0.855	2.032	1.263	1.632	0.732	1.389	1.552	1.386	0.814	0.713	1.139	0.795	1.426	1.366	0.915	2.088	1.081	0.672	1.221	1.515	1.12	1.163	0.689	1.799	1.196	1.156	1.05	0.769	1.284
P07737	1.378	1.159	2.577	1.954	0.739	0.536	0.622	0.905	2.195	2.519	1.396	2.36	1.456	0.771	0.519	0.987	1.816	2.487	1.763	1.175	0.838	1.931	1.165	1.495	0.742	1.343	1.429	1.388	0.737	0.709	1.033	0.666	1.257	1.206	0.799	1.876	1.138	0.66	1.185	1.386	1.082	1.269	0.734	1.82	1.219	1.14	0.973	0.771	1.217
Q9P258	1.234	0.955	1.885	1.457	0.577	0.466	0.52	0.997	1.712	2.098	1.236	2.113	1.504	0.707	0.436	1.023	1.911	2.318	1.517	1.117	0.812	1.873	1.23	1.538	0.736	1.348	1.529	1.342	0.748	0.663	1.086	0.777	1.362	1.362	0.884	1.971	1.096	0.66	1.218	1.498	1.135	1.246	0.714	1.821	1.311	1.192	1.055	0.792	1.343
K7EK60	1.129	1.068	1.96	1.638	0.554	0.497	0.423	0.826	2.26	2.154	1.062	1.779	1.224	0.69	0.477	1.069	1.595	2.03										1.322	0.88	0.702	1.204	0.89	1.5	1.419	0.902	2.136	0.946	0.648	1.156	1.347	1.089	1.156	0.673	1.612	1.136	1.215	1	0.833	1.409
Q13423	1.253	1.089	2.122	1.654	0.632	0.476	0.489	0.922	1.876	1.971	1.213	2.189	1.496	0.699	0.421	0.899	1.714	2.329	1.4	1.146	0.795	1.772	1.24	1.49	0.734	1.294	1.466	1.28	0.692	0.631	0.965	0.7	1.221	1.17	0.796	1.827	1.02	0.659	1.098	1.294	1.02	1.067	0.617	1.568	1.143	1.068	0.972	0.727	1.154
O15143	1.365	1.176	2.109	1.71	0.747	0.521	0.642	0.961	1.906	2.508	1.226	1.935	1.39	0.775	0.434	1.038	1.883	2.161	1.622	1.228	0.875	2.159	1.342	1.675	0.758	1.441	1.605	1.457	0.784	0.706	1.19	0.812	1.413	1.362	0.889	2.04	1.119	0.676	1.197	1.536	1.129	1.176	0.704	1.809	1.291	1.23	1.051	0.781	1.398
P30041	1.324	1.118	2.231	1.774	0.634	0.496	0.535	0.998	1.894	1.986	1.222	2.031	1.395	0.639	0.442	0.954	1.887	2.16	1.614	1.167	0.795	1.86	1.269	1.538	0.735	1.299	1.389	1.453	0.777	0.707	1.116	0.772	1.389	1.316	0.876	1.986	1.14	0.69	1.174	1.535	1.124	1.101	0.676	1.681	1.281	1.17	1.039	0.766	1.298
Q92888	1.398	1.195	2.237	1.755	0.734	0.588	0.656	0.992	2.06	2.431	1.263	2.128	1.527	0.802	0.494	1.124	1.83	2.445	1.517	1.128	0.833	1.796	1.239	1.553	0.733	1.359	1.467	1.328	0.781	0.69	1.099	0.793	1.401	1.398	0.933	2.023	1.029	0.689	1.195	1.417	1.128	1.212	0.72	1.765	1.255	1.144	1.012	0.784	1.253
Q15437	1.324	1.177	2.344	1.818	0.743	0.565	0.579	1.108	2.211	2.321	1.236	2.143	1.541	0.8	0.484	1.045	1.951	2.41	1.544	1.183	0.821	1.888	1.215	1.593	0.711	1.396	1.594	1.327	0.765	0.677	1.056	0.775	1.413	1.324	0.943	2.073	1.038	0.69	1.197	1.472	1.109	1.212	0.732	1.846	1.304	1.163	1.065	0.845	1.356
P09960	1.449	1.202	2.35	1.808	0.7	0.559	0.601	1.049	2.088	2.379	1.493	2.549	1.799	0.908	0.559	1.1	2.177	2.849	1.636	1.278	0.865	1.87	1.33	1.627	0.781	1.343	1.599	1.524	0.823	0.74	1.176	0.84	1.413	1.381	0.935	2.242	1.106	0.721	1.164	1.427	1.07	1.161	0.679	1.715	1.233	1.257	1.141	0.835	1.439
P31946	1.184	1.03	1.873	1.483	0.565	0.437	0.478	0.94	1.626	2.252	1.215	2.019	1.434	0.745	0.421	0.9	1.609	2.172	1.442	1.12	0.775	1.7	1.174	1.382	0.664	1.191	1.464	1.282	0.724	0.628	1.013	0.742	1.2	1.196	0.78	1.876	0.994	0.648	1.066	1.314	0.995	1.038	0.584	1.557	1.101	1.119	1.018	0.766	1.241
Q08J23	1.302	1.114	2.202	1.734	0.659	0.502	0.547	1.013	1.91	1.952	1.262	2.13	1.52	0.661	0.4	1.016	1.968	2.377	1.596	1.144	0.81	1.833	1.26	1.532	0.703	1.282	1.387	1.353	0.759	0.666	1.094	0.759	1.356	1.35	0.871	2.025	1.016	0.653	1.168	1.412	1.107	1.144	0.68	1.688	1.24	1.201	1.1	0.83	1.365
Q9NSE4	1.316	1.209	2.35	1.783	0.681	0.564	0.655	1.018	2.184	1.988	1.317	2.394	1.675	0.718	0.48	1.145	2.058	2.672	1.458	1.214	0.88	1.916	1.272	1.644	0.812	1.433	1.622	1.4	0.787	0.716	1.089	0.819	1.473	1.4	0.939	2.152	1.086	0.684	1.171	1.467	1.094	1.176	0.697	1.766	1.276	1.172	1.061	0.82	1.322
P21281	1.317	1.151	2.239	1.77	0.702	0.541	0.574	1.075	2.137	2.062	1.219	2.128	1.481	0.723	0.456	1.084	2.023	2.4	1.391	1.175	0.818	1.788	1.258	1.536	0.754	1.349	1.528	1.278	0.736	0.636	1.001	0.734	1.346	1.274	0.877	1.909	1.063	0.7	1.176	1.414	1.114	1.152	0.681	1.704	1.176	1.187	1.047	0.812	1.339
D6REX3	1.256	1.093	2.065	1.616	0.647	0.478	0.527	0.978	1.867	2.114	1.169	2.008	1.433	0.718	0.438	1.015	1.844	2.266	1.506	1.128	0.824	1.82	1.223	1.485	0.73	1.312	1.47	1.313	0.758	0.689	1.079	0.82	1.405	1.374	0.94	2.054	1.021	0.655	1.127	1.45	1.077	1.183	0.668	1.813	1.216	1.128	1.011	0.739	1.256
O43252	1.439	1.239	2.479	1.945	0.752	0.603	0.647	1.08	2.263	2.341	1.438	2.581	1.841	0.809	0.495	1.205	2.306	2.928	1.632	1.216	0.872	2.085	1.41	1.71	0.783	1.445	1.669	1.374	0.789	0.706	1.141	0.808	1.525	1.467	0.959	2.174	1.154	0.692	1.179	1.537	1.165	1.238	0.706	1.79	1.382	1.16	1.033	0.786	1.284
Q01082	1.224	1.101	2.227	1.694	0.668	0.529	0.571	1.003	2.122	2.059	1.105	1.8	1.256	0.648	0.406	0.883	1.557	2.087	1.37	1.028	0.788	1.658	1.136	1.524	0.711	1.297	1.449	1.221	0.686	0.626	0.91	0.676	1.248	1.183	0.833	1.84	0.981	0.635	1.088	1.305	1.041	1.135	0.641	1.662	1.169	1.06	0.97	0.758	1.222
A0A0G2JN29	1.326	1.184	2.255	1.749	0.696	0.521	0.564	1.019	1.987	2.007	1.169	1.979	1.392	0.709	0.469	0.887	1.7	2.254	1.409	1.238	0.823	1.727	1.192	1.494	0.755	1.317	1.412	1.234	0.71	0.642	0.971	0.719	1.23	1.233	0.81	1.775	0.954	0.665	1.17	1.272	1.056	1.103	0.667	1.544	1.108	1.118	1.021	0.781	1.231
P15880	1.302	1.029	2.108	1.64	0.629	0.447	0.508	0.838	1.803	2.257	1.307	2.324	1.575	0.721	0.475	0.907	1.8	2.482	1.576	1.196	0.783	1.83	1.175	1.48	0.661	1.175	1.371	1.411	0.769	0.69	1.049	0.695	1.275	1.214	0.797	2.021	1.078	0.644	1.139	1.379	1.003	1.069	0.582	1.724	1.128	1.116	1.028	0.728	1.233
P07602	1.402	1.036	2.15	1.49	0.597	0.428	0.498	0.85	1.694	1.98	1.114	2.176	1.578	0.636	0.366	1.018	1.698	2.299	1.482	1.112	0.742	1.878	1.156	1.476	0.672	1.194	1.336	1.519	0.763	0.615	1.006	0.736	1.27	1.335	0.764	1.919	1.136	0.671	0.992	1.498	1	0.897	0.504	1.457	1.142	1.261	1.216	0.684	1.229
Q13435	1.333	1.093	1.994	1.54	0.667	0.518	0.571	0.937	1.845	2.261	1.184	2.061	1.465	0.75	0.467	0.948	1.652	2.28	1.441	1.202	0.814	1.825	1.286	1.57	0.78	1.386	1.556	1.332	0.791	0.684	1.031	0.779	1.34	1.285	0.875	1.945	1.123	0.714	1.207	1.449	1.123	1.185	0.695	1.736	1.287	1.207	1.083	0.818	1.294
A0A1B0GVU9										1.566	0.994	2.077	1.424	0.801	0.472	1.015	1.911	2.193	0.867	1.174	0.889	2.127	1.374	1.827	0.93	1.827	1.648	1.317	0.938	0.923	1.186	1.222	1.87	1.924	1.421	2.431
Q06830	1.277	1.049	2.025	1.59	0.597	0.439	0.509	0.879	1.78	2.179	1.306	2.184	1.479	0.69	0.437	1.012	1.873	2.345	1.573	1.133	0.783	1.797	1.133	1.466	0.652	1.185	1.399	1.393	0.711	0.654	1.064	0.713	1.278	1.209	0.808	1.932	1.049	0.641	1.092	1.343	0.982	1.068	0.583	1.606	1.123	1.107	0.98	0.716	1.205
Q5T5C7	1.272	1.067	1.996	1.571	0.628	0.495	0.538	0.94	1.754	1.992	1.163	1.879	1.345	0.673	0.433	0.942	1.695	2.1	1.485	1.149	0.775	1.703	1.182	1.429	0.685	1.217	1.348	1.253	0.689	0.616	0.97	0.682	1.152	1.157	0.781	1.739	0.998	0.668	1.14	1.318	1.03	1.058	0.629	1.621	1.13	1.125	1.011	0.754	1.229
P07384	1.329	1.133	2.162	1.709	0.689	0.516	0.525	1.048	1.996	1.889	1.33	2.24	1.649	0.687	0.442	1.051	2.055	2.543	1.428	1.215	0.869	1.952	1.356	1.709	0.83	1.502	1.635	1.356	0.777	0.733	1.119	0.818	1.491	1.42	0.986	2.068	1.089	0.673	1.181	1.516	1.186	1.202	0.74	1.695	1.319	1.194	1.049	0.804	1.346
Q86UP2	1.281	1.074	1.997	1.562	0.667	0.538	0.571	1	1.9	1.972	1.198	1.938	1.4	0.688	0.413	0.897	1.851	2.185	1.288	1.131	0.796	1.755	1.205	1.516	0.736	1.282	1.502	1.339	0.703	0.651	1.045	0.804	1.343	1.305	0.888	1.946	1.001	0.646	1.105	1.447	1.085	1.153	0.616	1.739	1.245	1.146	1.004	0.721	1.292
H0Y4R1	1.382	1.211	2.364	1.832	0.733	0.558	0.591	1.032	2.131	2.259	1.277	2.157	1.483	0.743	0.467	0.963	1.792	2.314	1.52	1.199	0.847	1.846	1.299	1.555	0.748	1.327	1.483	1.343	0.768	0.687	1.051	0.781	1.357	1.28	0.87	1.967	1.096	0.715	1.221	1.465	1.122	1.249	0.718	1.825	1.279	1.189	1.074	0.836	1.353
P09972	1.567	1.419	2.832	2.213	0.857	0.646	0.676	1.379	2.56	2.458	1.543	2.726	1.886	0.952	0.555	1.357	2.409	2.773	1.481	1.436	1.027	2.142	1.704	1.941	1	1.684	1.969	1.592	0.922	0.831	1.281	0.989	1.732	1.613	1.121	2.484	1.373	0.883	1.526	1.95	1.549	1.543	0.873	2.24	1.698	1.436	1.242	0.944	1.605
Q16666	1.377	1.167	2.174	1.761	0.721	0.542	0.604	0.98	2.046	2.368	1.257	2.194	1.557	0.773	0.448	0.995	1.889	2.47	1.752	1.262	0.887	1.969	1.327	1.628	0.737	1.378	1.604	1.454	0.857	0.742	1.167	0.83	1.447	1.415	0.916	2.116	1.145	0.709	1.23	1.485	1.152	1.198	0.705	1.85	1.33	1.253	1.119	0.829	1.41
Q9NQW7	1.3	1.16	2.133	1.636	0.684	0.531	0.538	0.969	1.933	1.953	1.367	2.368	1.685	0.748	0.449	0.978	1.94	2.555	1.451	1.218	0.849	1.878	1.291	1.594	0.775	1.39	1.535	1.415	0.787	0.724	1.138	0.831	1.444	1.378	0.934	2.148	1.069	0.736	1.229	1.472	1.115	1.219	0.737	1.728	1.333	1.141	1.101	0.835	1.348
A0AVT1	1.371	1.179	2.325	1.813	0.734	0.59	0.607	1.054	2.163	1.96	1.283	2.229	1.557	0.738	0.443	1.097	2.015	2.44	1.335	1.198	0.823	1.83	1.298	1.599	0.813	1.404	1.527	1.348	0.802	0.701	1.096	0.812	1.361	1.341	0.921	1.98	1.019	0.734	1.155	1.413	1.092	1.126	0.661	1.678	1.199	1.089	1.038	0.755	1.232
Q9UHD8	1.222	1.048	1.999	1.55	0.66	0.52	0.55	0.967	1.899	2.185	1.18	1.984	1.431	0.752	0.479	1.02	1.807	2.263	1.458	1.134	0.819	1.844	1.235	1.524	0.71	1.396	1.533	1.279	0.738	0.659	1.023	0.752	1.339	1.314	0.889	1.931	1.03	0.65	1.169	1.391	1.079	1.24	0.677	1.902	1.187	1.117	0.994	0.752	1.271
C9J406
P62136	1.339	1.159	2.344	1.834	0.671	0.479	0.524	0.996	2.099	1.936	1.333	2.364	1.704	0.648	0.411	1.031	2.097	2.588	1.368	1.139	0.779	1.796	1.266	1.54	0.743	1.321	1.499	1.364	0.75	0.661	1.071	0.789	1.312	1.287	0.88	1.997	1.091	0.689	1.176	1.494	1.17	1.172	0.682	1.685	1.264	1.185	1.078	0.754	1.347
P35998	1.259	1.066	2.062	1.617	0.611	0.487	0.552	1.023	1.868	2.051	1.154	2.055	1.486	0.704	0.427	0.99	1.828	2.255	1.454	1.137	0.753	1.74	1.2	1.51	0.696	1.245	1.491	1.311	0.732	0.631	1.04	0.719	1.315	1.245	0.818	1.99	1.031	0.665	1.114	1.353	1.05	1.142	0.646	1.655	1.213	1.144	0.994	0.763	1.279
Q02790	1.309	1.092	2.123	1.654	0.664	0.5	0.585	0.97	1.92	2.329	1.226	2.077	1.453	0.753	0.443	1.007	1.811	2.287	1.663	1.211	0.829	1.954	1.305	1.613	0.715	1.309	1.499	1.417	0.761	0.682	1.102	0.762	1.329	1.29	0.856	2.015	1.104	0.693	1.166	1.484	1.078	1.139	0.654	1.737	1.227	1.176	1.05	0.805	1.341
P49321	1.36	1.169	2.213	1.746	0.688	0.525	0.59	1.067	2.062	2.298	1.289	2.189	1.538	0.769	0.444	1.071	1.952	2.386	1.579	1.193	0.82	1.879	1.291	1.559	0.699	1.301	1.603	1.383	0.766	0.643	1.069	0.798	1.358	1.312	0.86	1.985	1.07	0.684	1.201	1.547	1.141	1.123	0.627	1.758	1.273	1.178	1.06	0.786	1.311
P50995	1.322	1.109	2.065	1.614	0.665	0.509	0.567	0.978	1.895	2.095	1.184	1.951	1.397	0.725	0.467	1.01	1.725	2.171	1.541	1.165	0.815	1.772	1.261	1.53	0.724	1.306	1.447	1.316	0.737	0.658	1.031	0.729	1.259	1.243	0.825	1.902	1.02	0.685	1.139	1.397	1.073	1.14	0.634	1.751	1.207	1.113	0.989	0.749	1.239
O75165	1.349	1.19	2.316	1.729	0.713	0.569	0.558	1.075	2.115	1.96	1.269	2.14	1.598	0.761	0.515	0.943	1.97	2.399	1.231	1.169	0.795	1.602	1.174	1.461	0.805	1.243	1.413	1.346	0.811	0.715	1.109	0.824	1.413	1.43	0.884	2.152	0.899	0.666	1.149	1.254	1.005	1.124	0.666	1.47	1.218	1.098	1.026	0.749	1.204
P36222	1.384	1.192	2.229	1.776	0.714	0.548	0.61	1.059	2.058	2.259	1.286	2.176	1.504	0.784	0.475	0.992	1.901	2.377	1.567	1.198	0.845	1.859	1.28	1.563	0.75	1.361	1.48	1.407	0.785	0.702	1.068	0.765	1.369	1.312	0.897	2.019	1.035	0.676	1.167	1.403	1.062	1.092	0.639	1.693	1.164	1.1	0.98	0.734	1.246
P35232	1.264	1.117	2.03	1.613	0.651	0.493	0.534	0.896	1.845	2.112	1.246	2.081	1.484	0.742	0.455	0.947	1.648	2.254	1.43	1.131	0.744	1.693	1.159	1.419	0.701	1.216	1.351	1.301	0.728	0.64	1.012	0.716	1.244	1.231	0.803	1.848	1.025	0.67	1.131	1.338	1.039	1.088	0.626	1.636	1.172	1.087	0.995	0.72	1.223
Q9Y265	1.212	1.041	2.073	1.573	0.612	0.464	0.515	0.886	1.796	1.9	1.261	2.221	1.5	0.676	0.434	0.863	1.898	2.417	1.4	1.141	0.788	1.765	1.234	1.512	0.727	1.283	1.43	1.285	0.735	0.677	1.035	0.72	1.285	1.239	0.857	1.936	1.092	0.69	1.169	1.448	1.101	1.166	0.723	1.675	1.264	1.093	0.984	0.737	1.211
O00116	1.263	1.146	2.247	1.769	0.697	0.534	0.579	1.045	2.052	2.003	1.251	2.142	1.559	0.735	0.429	0.996	1.987	2.377	1.514	1.115	0.806	1.841	1.286	1.56	0.749	1.326	1.555	1.287	0.765	0.666	1.068	0.797	1.372	1.336	0.92	2.053	1.023	0.644	1.149	1.415	1.078	1.178	0.66	1.751	1.24	1.146	0.999	0.775	1.313
H0Y5F5	1.28	1.042	1.932	1.54	0.603	0.487	0.529	0.971	1.77	2.334	1.071	1.688	1.278	0.677	0.428	1.052	1.617	1.983	1.575	1.183	0.937	1.994	1.27	1.551	0.752	1.576	1.526	1.271	0.74	0.684	1.03	0.799	1.47	1.544	1.03	1.983	0.985	0.668	1.234	1.511	1.134	1.322	0.722	1.922	1.164	1.226	1.099	0.799	1.354
M0QZM1	1.325	1.118	2.042	1.568	0.672	0.629	0.624	0.857	1.869	2.469	1	1.43	1.034	0.907	0.513	0.673	1.266	1.665	1.055	1.143	0.717	1.646	1.218	1.486	0.799	1.947	1.908	1.076	0.679	0.575	0.797	0.621	1.021	1.111	0.712	1.462	1.027	0.847	1.22	1.185	0.987	1.169	0.806	1.888	1.097	1.097	1.054	0.915	1.227
Q14669	1.284	1.118	2.12	1.609	0.688	0.524	0.518	0.914	1.915	1.868	1.302	2.325	1.675	0.706	0.429	1.107	2.109	2.626	1.434	1.151	0.804	1.833	1.237	1.511	0.744	1.267	1.404	1.296	0.748	0.689	1.057	0.797	1.344	1.314	0.906	1.904	0.966	0.598	1.065	1.357	1.03	1.049	0.621	1.494	1.139	1.138	1.039	0.801	1.263
Q9BXP5	1.206	0.997	1.843	1.436	0.609	0.512	0.567	0.963	1.705	2.129	1.142	1.928	1.334	0.715	0.422	0.949	1.75	2.14	1.649	1.119	0.792	1.796	1.183	1.466	0.654	1.273	1.456	1.275	0.727	0.607	1.006	0.709	1.258	1.248	0.85	1.881	1.018	0.624	1.118	1.381	1.054	1.102	0.589	1.674	1.134	1.204	1.094	0.797	1.388
Q7L1Q6	1.3	1.126	2.033	1.583	0.676	0.527	0.581	1.025	1.855	2.115	1.288	2.104	1.502	0.74	0.46	0.997	1.871	2.266	1.489	1.211	0.8	1.816	1.312	1.618	0.695	1.29	1.532	1.367	0.764	0.662	1.095	0.77	1.315	1.279	0.851	1.973	1.076	0.693	1.193	1.491	1.115	1.104	0.627	1.74	1.241	1.152	1.077	0.768	1.31
P26641	1.307	1.108	2.15	1.716	0.635	0.489	0.546	0.971	1.932	2.214	1.26	2.175	1.57	0.758	0.454	0.974	1.822	2.424	1.531	1.178	0.794	1.807	1.199	1.492	0.713	1.25	1.454	1.385	0.749	0.663	1.067	0.741	1.254	1.231	0.835	1.935	1.047	0.652	1.159	1.377	1.058	1.074	0.635	1.603	1.18	1.179	1.042	0.762	1.271
Q9Y3F4	1.292	1.126	2.189	1.746	0.704	0.531	0.607	1.071	1.993	2.241	1.262	2.189	1.513	0.753	0.458	1.185	1.948	2.412	1.517	1.209	0.851	1.883	1.286	1.596	0.762	1.331	1.563	1.397	0.789	0.687	1.123	0.79	1.431	1.318	0.887	2.109	1.065	0.695	1.167	1.47	1.115	1.133	0.675	1.666	1.294	1.232	1.106	0.808	1.368
P78347	1.406	1.184	2.378	1.838	0.732	0.57	0.595	1.131	2.205	2.166	1.462	2.63	1.864	0.781	0.504	1.132	2.221	2.902	1.575	1.234	0.86	1.918	1.31	1.606	0.767	1.386	1.613	1.428	0.79	0.716	1.109	0.78	1.409	1.374	0.91	2.101	1.124	0.723	1.265	1.565	1.18	1.297	0.737	1.917	1.409	1.242	1.118	0.833	1.383
F8W6I7	1.267	0.937	1.784	1.347	0.654	0.523	0.697	0.878	1.63	2.141	0.699	1.009	0.68	0.493	0.305	0.804	1.082	1.126	1.472	1.111	0.783	1.819	1.142	1.44	0.657	1.255	1.078	1.325	0.767	0.619	1.106	0.725	1.284	1.274	0.838	1.696	1.143	0.699	1.273	1.576	1.211	1.233	0.742	1.924	1.143	1.201	1.159	0.758	1.389
P62195	1.312	1.147	2.249	1.76	0.667	0.521	0.584	1.006	2.116	2.238	1.267	2.247	1.593	0.769	0.466	1.008	1.875	2.428	1.41	1.135	0.754	1.772	1.252	1.455	0.696	1.225	1.469	1.302	0.731	0.648	1.019	0.718	1.249	1.212	0.825	1.939	1.029	0.68	1.132	1.41	1.052	1.086	0.643	1.677	1.188	1.129	1.008	0.718	1.227
Q9Y230	1.257	1.084	2.19	1.713	0.623	0.47	0.503	0.943	1.93	1.84	1.237	2.251	1.57	0.634	0.403	0.971	1.91	2.417	1.349	1.144	0.767	1.787	1.243	1.557	0.741	1.299	1.542	1.276	0.701	0.631	1.007	0.723	1.268	1.215	0.827	1.891	1.012	0.649	1.147	1.367	1.04	1.086	0.654	1.644	1.21	1.137	1.007	0.739	1.235
P33993	1.31	1.139	2.218	1.735	0.692	0.532	0.568	1.025	2.008	1.984	1.293	2.263	1.585	0.669	0.419	1.129	2.004	2.487	1.446	1.212	0.848	1.878	1.284	1.585	0.8	1.418	1.549	1.335	0.778	0.68	1.1	0.76	1.382	1.349	0.905	1.989	1.056	0.675	1.207	1.486	1.139	1.188	0.706	1.846	1.275	1.159	1.077	0.772	1.322
P36578	1.389	1.167	2.423	1.891	0.682	0.53	0.579	1.015	2.154	2.246	1.37	2.462	1.71	0.757	0.493	1.057	2.039	2.677	1.631	1.266	0.859	2.007	1.262	1.697	0.732	1.356	1.64	1.524	0.834	0.75	1.166	0.805	1.465	1.404	0.918	2.297	1.074	0.66	1.148	1.452	1.07	1.084	0.641	1.622	1.213	1.122	1.01	0.725	1.241
Q9Y696	1.251	1.157	2.166	1.656	0.724	0.563	0.611	0.951	1.936	2.061	1.172	2.023	1.465	0.739	0.405	1.01	1.672	2.171	1.382	1.091	0.758	1.786	1.222	1.432	0.651	1.251	1.473	1.263	0.706	0.654	1.015	0.722	1.299	1.285	0.845	1.865	1.004	0.627	1.093	1.377	1.041	1.074	0.602	1.721	1.166	1.117	1.054	0.753	1.362
P19367	1.345	1.228	2.266	1.854	0.707	0.517	0.522	1.063	2.07	2.327	1.286	2.314	1.616	0.809	0.51	1.022	2.091	2.522	1.158	1.29	0.82	1.894	1.419	1.658	0.873	1.518	1.593	1.305	0.789	0.698	1.069	0.815	1.431	1.406	0.964	2.128	1.096	0.721	1.233	1.461	1.154	1.199	0.712	1.791	1.273	1.16	1.066	0.801	1.276
Q9UQ80	1.306	1.103	2.146	1.679	0.629	0.474	0.546	0.96	1.951	2.244	1.31	2.321	1.595	0.739	0.429	1.044	1.918	2.472	1.58	1.25	0.828	1.931	1.311	1.594	0.716	1.308	1.57	1.48	0.814	0.697	1.166	0.816	1.393	1.362	0.873	2.123	1.068	0.702	1.186	1.485	1.115	1.115	0.65	1.68	1.24	1.188	1.102	0.792	1.336
P35908	1.525	0.914	1.492	1.039	0.43	0.385	0.394	0.676	2.963	1.413	0.994	1.404	1.224	0.593	0.683	1.246	0.92	1.508	0.935	0.797	0.474	1.286	1.011	3.18	0.725	0.988	1.365	0.504	0.363	0.387	1.185	0.302	0.84	0.532	0.476	0.793	0.199	0.119	0.158	0.181	0.264	0.192	0.093	0.308	0.236	0.543	0.555	0.397	0.579
P62937	1.334	1.073	2.401	1.84	0.718	0.451	0.511	0.791	1.996	2.191	1.4	2.256	1.238	0.678	0.449	0.837	1.577	2.281	1.761	1.079	0.793	1.943	1.038	1.339	0.569	1.172	1.391	1.269	0.667	0.702	0.923	0.556	1.075	0.99	0.696	1.706	1.095	0.622	1.127	1.386	1.066	1.144	0.725	1.807	1.141	1.113	0.966	0.785	1.237
P09525	1.42	1.219	2.317	1.845	0.691	0.553	0.602	1.119	2.099	2.196	1.332	2.326	1.685	0.752	0.461	1.244	2.13	2.566	1.601	1.277	0.877	1.928	1.365	1.638	0.798	1.437	1.58	1.504	0.837	0.699	1.173	0.831	1.439	1.397	0.94	2.118	1.102	0.718	1.239	1.569	1.205	1.218	0.716	1.848	1.356	1.255	1.155	0.833	1.445
Q9HAV4	1.347	1.149	2.208	1.766	0.68	0.507	0.559	1.052	2.025	1.975	1.264	2.129	1.501	0.723	0.466	0.949	1.919	2.371	1.34	1.267	0.869	1.852	1.397	1.682	0.89	1.464	1.716	1.437	0.774	0.71	1.136	0.791	1.355	1.318	0.958	2.058	1.035	0.714	1.189	1.438	1.152	1.144	0.722	1.61	1.383	1.248	1.131	0.825	1.369
E9PB90	1.388	1.137	2.101	1.612	0.696	0.576	0.61	1.02	1.971	1.741	1.232	2.11	1.495	0.68	0.494	1.001	1.893	2.281	1.499	1.198	0.871	1.822	1.284	1.54	0.744	1.285	1.526	1.352	0.787	0.724	1.089	0.776	1.314	1.298	0.924	2.054	1.051	0.705	1.207	1.429	1.101	1.183	0.703	1.704	1.262	1.199	1.066	0.818	1.279
P20702	1.344	1.157	2.192	1.716	0.714	0.55	0.529	1.012	2.025	1.935	1.2	1.972	1.415	0.653	0.477	0.871	1.685	2.074	1.485	1.283	0.898	1.935	1.374	1.654	0.828	1.455	1.535	1.492	0.823	0.735	1.116	0.808	1.458	1.374	0.933	2.057	1.167	0.804	1.284	1.523	1.207	1.278	0.741	1.788	1.275	1.221	1.088	0.83	1.376
O95573	1.307	1.101	2.141	1.703	0.709	0.577	0.633	0.973	1.974	2.092	1.236	2.04	1.48	0.741	0.471	1.087	1.921	2.302	1.474	1.175	0.846	1.946	1.217	1.573	0.758	1.397	1.476	1.301	0.749	0.663	1.01	0.77	1.353	1.308	0.913	1.99	0.975	0.618	1.181	1.385	1.079	1.282	0.696	1.878	1.174	1.103	0.968	0.74	1.259
F8VZX2	1.387	1.305	2.431	1.859	0.786	0.729	0.738	1.205	2.288	2.282	0.932	1.493	1.171	0.892	0.442	0.802	1.463	1.829	1.453	1	0.898	1.597	1.198	1.962	0.856	1.355	1.731										1.107	0.654	1.216	1.819	1.303	1.334	0.735	1.792	1.433	1.325	1.17	0.899	1.411
Q9H4M9	1.484	1.316	2.628	1.991	0.729	0.579	0.658	1.174	2.346	2.121	1.428	2.687	2.009	0.78	0.505	1.608	2.359	2.935	1.595	1.323	0.886	2.028	1.465	1.793	0.84	1.518	1.792	1.611	0.902	0.827	1.253	0.996	1.694	1.608	1.125	2.532	1.307	0.892	1.311	1.749	1.381	1.291	0.778	1.948	1.604	1.407	1.33	0.935	1.588
F5GZS6	1.24	1.055	1.951	1.538	0.612	0.484	0.511	0.916	1.782	1.939	1.111	1.976	1.458	0.644	0.4	0.961	1.812	2.186	1.305	1.092	0.713	1.564	1.126	1.349	0.675	1.168	1.258	1.261	0.703	0.616	0.987	0.689	1.175	1.139	0.761	1.739	0.895	0.594	1.016	1.255	0.947	0.97	0.528	1.504	1.09	1.011	0.971	0.649	1.17
P05198	1.279	1.094	2.113	1.675	0.641	0.499	0.544	0.953	1.948	1.971	1.252	2.187	1.572	0.709	0.44	0.955	1.844	2.456	1.445	1.169	0.813	1.889	1.23	1.551	0.731	1.352	1.574	1.275	0.748	0.649	1.04	0.777	1.364	1.288	0.886	1.951	1.029	0.692	1.158	1.378	1.078	1.189	0.677	1.746	1.201	1.132	1.017	0.753	1.28
P12109	1.454	1.226	2.366	1.895	0.707	0.539	0.552	1.064	2.172	2.308	1.39	2.492	1.781	0.782	0.495	1.099	2.215	2.762	1.62	1.219	0.878	2	1.334	1.633	0.769	1.391	1.559	1.471	0.765	0.683	1.138	0.78	1.344	1.289	0.868	2.065	1.189	0.725	1.27	1.567	1.188	1.25	0.7	1.887	1.312	1.245	1.139	0.815	1.37
P09104	1.626	1.305	2.589	2.068	0.699	0.594	0.494	1.277	2.309	1.89	1.295	2.073	1.448	0.703	0.46	0.912	1.832	2.327	1.503	1.266	0.928	1.908	1.451	1.742	0.874	1.624	1.662	1.44	0.823	0.728	1.088	0.81	1.508	1.355	0.975	2.105	1.22	0.804	1.341	1.586	1.253	1.372	0.783	1.923	1.434	1.327	1.143	0.886	1.507
Q15459	1.283	1.109	2.179	1.691	0.668	0.512	0.569	1.006	2.013	2.094	1.214	2.101	1.503	0.723	0.417	0.939	1.783	2.335	1.423	1.189	0.819	1.795	1.266	1.559	0.743	1.352	1.551	1.353	0.779	0.671	1.035	0.779	1.351	1.318	0.872	1.984	1.082	0.701	1.181	1.451	1.075	1.144	0.668	1.711	1.245	1.192	1.084	0.797	1.302
O75874	1.254	1.111	2.081	1.664	0.676	0.527	0.57	0.959	1.928	2.179	1.229	2.17	1.551	0.734	0.445	0.97	1.862	2.38	1.43	1.096	0.783	1.734	1.187	1.471	0.684	1.265	1.408	1.381	0.752	0.646	1.077	0.78	1.351	1.286	0.886	1.961	1.034	0.619	1.091	1.369	1.009	1.098	0.624	1.581	1.221	1.08	0.991	0.711	1.253
Q04446	1.414	1.228	2.552	1.993	0.765	0.568	0.639	1.112	2.317	2.308	1.383	2.441	1.66	0.796	0.473	1.113	2.122	2.591	1.691	1.26	0.896	2.023	1.352	1.671	0.784	1.439	1.643	1.436	0.802	0.692	1.131	0.81	1.432	1.375	0.946	2.145	1.168	0.723	1.27	1.565	1.205	1.278	0.712	1.885	1.327	1.252	1.089	0.828	1.403
Q99536	1.163	0.997	1.961	1.558	0.589	0.437	0.466	0.898	1.762	1.872	1.275	2.172	1.542	0.672	0.425	0.977	1.853	2.303	1.424	1.124	0.748	1.728	1.227	1.462	0.677	1.198	1.418	1.259	0.704	0.662	1.011	0.691	1.253	1.166	0.786	1.862	0.936	0.629	1.045	1.288	0.943	0.992	0.594	1.556	1.083	1.041	0.967	0.725	1.194
P27695	1.388	1.162	2.139	1.678	0.663	0.5	0.565	1.08	1.941	2.235	1.311	2.18	1.579	0.792	0.447	1.195	2.08	2.363	1.588	1.235	0.816	1.908	1.318	1.626	0.732	1.332	1.592	1.477	0.813	0.691	1.157	0.814	1.473	1.422	0.922	2.223	1.094	0.682	1.191	1.539	1.163	1.156	0.624	1.795	1.31	1.244	1.103	0.785	1.396
P62873	1.188	0.976	1.776	1.428	0.573	0.423	0.504	0.792	1.489	2.282	1.147	1.881	1.313	0.692	0.429	0.893	1.576	1.976	1.501	1.087	0.803	1.752	1.187	1.41	0.68	1.221	1.322	1.311	0.701	0.65	1.031	0.716	1.193	1.167	0.767	1.842	1.058	0.699	1.122	1.413	1.036	1.07	0.629	1.621	1.168	1.141	1.024	0.762	1.249
P30520	1.391	1.167	2.282	1.78	0.701	0.504	0.568	1.049	2.096	2.004	1.275	2.172	1.543	0.711	0.459	1.04	2.011	2.452	1.599	1.22	0.841	1.864	1.291	1.567	0.764	1.322	1.578	1.377	0.795	0.732	1.121	0.79	1.386	1.336	0.887	2.176	1.087	0.7	1.181	1.436	1.108	1.142	0.694	1.684	1.273	1.201	1.112	0.846	1.332
O43592	1.301	1.078	2.088	1.631	0.654	0.518	0.628	0.966	1.94	1.794	1.266	2.216	1.577	0.653	0.471	0.959	2.057	2.467	1.409	1.322	0.839	1.933	1.433	1.539	0.82	1.33	1.594	1.356	0.785	0.663	1.084	0.804	1.318	1.302	0.908	2.081	1.022	0.672	1.069	1.375	1.032	1.032	0.625	1.535	1.122	1.205	1.118	0.752	1.294
Q92499	1.245	1.043	2.086	1.629	0.654	0.502	0.553	0.954	1.918	1.994	1.111	1.86	1.321	0.664	0.391	0.879	1.635	2.094	1.46	1.116	0.776	1.761	1.179	1.526	0.71	1.314	1.442	1.241	0.693	0.668	0.982	0.71	1.282	1.214	0.849	1.909	1.073	0.662	1.198	1.389	1.077	1.237	0.706	1.851	1.236	1.112	0.991	0.753	1.267
P31943	1.269	1.069	2.116	1.606	0.631	0.47	0.534	0.888	1.851	1.995	1.116	1.945	1.241	0.626	0.406	0.915	1.646	2.085	1.393	1.071	0.795	1.791	1.13	1.494	0.682	1.286	1.446	1.228	0.694	0.617	1.002	0.645	1.194	1.114	0.772	1.825	1.134	0.686	1.244	1.519	1.146	1.205	0.702	1.898	1.262	1.178	1.087	0.818	1.334
E7EX90	1.373	1.141	2.181	1.713	0.681	0.557	0.609	1.063	2.005	2.146	1.282	2.326	1.698	0.829	0.474	1.103	1.943	2.661	1.662	1.193	0.84	1.863	1.294	1.643	0.731	1.421	1.584	1.297	0.729	0.666	1.089	0.686	1.193	1.214	0.767	1.858	0.976	0.621	1.146	1.332	1.017	1.181	0.642	1.799	1.136	1.153	1.027	0.809	1.247
P27348	1.198	1.003	1.888	1.468	0.593	0.43	0.522	0.895	1.65	2.23	1.216	2.081	1.463	0.687	0.41	0.995	1.81	2.191	1.463	1.169	0.773	1.734	1.227	1.412	0.676	1.199	1.402	1.363	0.733	0.634	1.065	0.744	1.273	1.244	0.821	1.924	1.021	0.654	1.079	1.412	1.012	0.994	0.577	1.529	1.14	1.131	1.023	0.755	1.249
P51991	1.293	1.029	1.977	1.488	0.707	0.553	0.612	0.881	1.829	2.308	0.923	1.433	0.977	0.587	0.351	0.87	1.317	1.538	1.571	1.101	0.841	1.939	1.144	1.588	0.701	1.41	1.267	1.247	0.74	0.628	1.036	0.695	1.302	1.275	0.866	1.752	1.071	0.665	1.214	1.51	1.203	1.228	0.7	1.877	1.097	1.173	1.071	0.793	1.31
O43776	1.23	1.048	2.037	1.563	0.62	0.466	0.572	0.889	1.813	2.061	1.228	2.152	1.543	0.742	0.437	0.944	1.785	2.365	1.446	1.084	0.741	1.66	1.169	1.408	0.658	1.16	1.356	1.248	0.695	0.626	0.969	0.696	1.173	1.151	0.781	1.815	0.987	0.632	1.085	1.308	1.011	1.025	0.589	1.579	1.125	1.104	0.989	0.725	1.183
P46063	1.386	1.195	2.446	1.885	0.737	0.583	0.579	1.079	2.307	2.097	1.202	2.041	1.414	0.687	0.424	1.03	1.993	2.324	1.407	1.186	0.862	2.018	1.264	1.702	0.758	1.484	1.612	1.342	0.751	0.681	1.063	0.785	1.411	1.371	0.937	2.038	1.084	0.686	1.257	1.581	1.186	1.3	0.697	1.955	1.364	1.146	1.045	0.794	1.326
Q5SW79	1.364	1.114	1.817	1.408	0.676	0.585	0.615	0.905	1.712	2.528	1.227	1.74	1.393	0.864	0.502	1.084	1.544	2.046	1.707	1.276	0.968	2.047	1.571	1.825	0.801	1.473	1.543	1.468	0.815	0.723	1.169	1.01	1.661	1.561	1.038	2.094	1.094	0.728	1.243	1.439	1.077	1.293	0.686	1.905	1.235	1.168	1.008	0.838	1.389
P62495	1.314	1.131	2.215	1.765	0.682	0.501	0.512	0.967	1.906	2.094	1.279	2.247	1.512	0.663	0.428	0.979	2.005	2.366	1.509	1.185	0.818	1.815	1.24	1.544	0.744	1.308	1.443	1.317	0.771	0.677	1.034	0.774	1.347	1.284	0.851	1.94	1.081	0.691	1.2	1.415	1.069	1.147	0.691	1.687	1.22	1.195	1.07	0.817	1.317
P54819	1.763	1.442	2.777	1.793	0.899	0.619	0.659	1.251	2.196	2.453	1.362	2.296	1.625	0.947	0.505	1.317	1.67	2.102	1.926	1.261	0.994	2.018	1.538	1.764	0.802	1.461	1.599	1.539	0.89	0.764	1.004	0.87	1.484	1.459	0.867	1.828	1.413	0.956	1.363	1.799	1.333	1.248	0.768	2.018	1.439	1.311	1.247	0.965	1.463
Q92614	1.286	1.067	2.033	1.607	0.649	0.477	0.54	0.901	1.855	2.328	1.215	2.009	1.404	0.814	0.505	0.912	1.704	2.262	1.37	1.149	0.782	1.781	1.222	1.545	0.772	1.348	1.535	1.319	0.732	0.677	1.015	0.747	1.339	1.275	0.896	1.897	1.042	0.66	1.161	1.345	1.082	1.117	0.672	1.709	1.212	1.061	0.993	0.721	1.172
O75390	1.338	1.126	2.198	1.67	0.646	0.489	0.586	1.038	2.02	2.255	1.332	2.263	1.582	0.758	0.512	1.043	1.901	2.431	1.612	1.275	0.818	1.956	1.324	1.62	0.759	1.285	1.624	1.465	0.808	0.708	1.175	0.799	1.427	1.381	0.923	2.134	1.135	0.729	1.184	1.508	1.112	1.095	0.623	1.645	1.295	1.19	1.104	0.751	1.349
Q13838	1.219	1.041	2.147	1.665	0.584	0.439	0.503	0.926	1.93	1.823	1.241	2.258	1.533	0.641	0.424	1.007	1.881	2.47	1.352	1.09	0.713	1.74	1.184	1.425	0.66	1.184	1.43	1.27	0.719	0.616	1.038	0.709	1.228	1.19	0.796	1.875	1.067	0.648	1.195	1.503	1.125	1.145	0.676	1.594	1.204	1.182	1.067	0.78	1.27
O00754	1.338	1.184	2.218	1.716	0.728	0.54	0.552	1.065	2.051	2.076	1.327	2.29	1.594	0.751	0.489	1.09	2.029	2.483	1.428	1.25	0.886	1.904	1.328	1.654	0.851	1.412	1.639	1.444	0.794	0.717	1.15	0.837	1.441	1.438	0.953	2.162	1.119	0.746	1.229	1.515	1.173	1.295	0.717	1.834	1.43	1.239	1.131	0.831	1.396
Q15942	1.35	1.164	1.986	1.374	0.678	0.559	0.635	1.055	1.805	2.67	1.133	1.81	1.344	0.899	0.472	1.138	1.596	1.827	1.449	1.138	0.867	1.713	1.228	1.591	0.685	1.333	1.457	1.536	0.871	0.704	1.083	0.938	1.678	1.611	1.012	2.075	1.137	0.79	1.173	1.612	1.137	1.209	0.635	2.056	1.345	1.234	1.197	0.863	1.437
P20700	1.17	0.931	1.833	1.496	0.561	0.438	0.474	0.76	1.619	2.067	1.09	2.034	1.517	0.613	0.406	0.928	1.484	2.08	1.413	1	0.664	1.737	1.054	1.344	0.68	1.067	1.406	1.22	0.675	0.566	1.116	0.643	1.089	1.171	0.78	1.626	1.092	0.427	0.758	1.187	0.697	1.043	0.567	1.326	1.102	1.226	0.725	0.578	1.17
Q12931	1.372	1.158	2.395	1.939	0.733	0.52	0.515	1.069	2.193	2.042	1.253	2.158	1.541	0.73	0.458	1.033	1.937	2.433	1.371	1.156	0.815	1.793	1.24	1.541	0.777	1.331	1.449	1.307	0.746	0.669	1.073	0.771	1.389	1.31	0.921	2	1.025	0.662	1.145	1.398	1.082	1.121	0.661	1.655	1.247	1.113	1.025	0.772	1.254
Q9UQ35	1.331	1.088	1.949	1.424	0.68	0.552	0.589	0.861	1.69	2.411	1.031	1.684	1.159	0.724	0.449	0.866	1.612	1.831	1.581	1.123	0.859	1.839	1.204	1.506	0.709	1.366	1.407	1.35	0.746	0.657	1.114	0.784	1.368	1.38	0.892	1.969	1.113	0.622	1.236	1.465	1.101	1.293	0.681	2.113	1.203	1.237	1.033	0.792	1.3
O75844	1.197	1.003	1.892	1.511	0.617	0.453	0.495	0.842	1.674	1.926	1.126	1.893	1.252	0.621	0.402	0.777	1.565	2.049	1.451	1.071	0.747	1.705	1.073	1.386	0.641	1.148	1.26	1.238	0.672	0.611	0.947	0.639	1.174	1.141	0.759	1.739	0.937	0.603	1.041	1.225	0.915	1.024	0.6	1.564	1.068	1.047	0.927	0.708	1.148
Q15366	1.235	1.069	2.072	1.566	0.665	0.513	0.591	0.865	1.843	2.222	1.253	2.09	1.443	0.73	0.474	0.855	1.637	2.285	1.61	1.203	0.773	1.814	1.233	1.473	0.713	1.223	1.343	1.381	0.734	0.68	1.066	0.728	1.269	1.225	0.8	1.929	1.087	0.693	1.173	1.402	1.05	1.091	0.658	1.607	1.155	1.144	1.049	0.763	1.22
P37837	1.296	1.168	2.265	1.783	0.64	0.451	0.492	0.975	1.973	1.99	1.362	2.494	1.735	0.718	0.433	1.077	2.067	2.651	1.453	1.213	0.805	1.883	1.3	1.622	0.717	1.3	1.63	1.421	0.756	0.66	1.104	0.759	1.33	1.272	0.821	2.045	1.073	0.701	1.177	1.489	1.095	1.089	0.629	1.634	1.285	1.168	1.059	0.751	1.321
P52306	1.304	1.16	2.317	1.758	0.718	0.476	0.554	0.996	2.004	1.914	1.221	2.139	1.548	0.696	0.421	1.043	1.792	2.342	1.367	1.195	0.815	1.814	1.37	1.618	0.868	1.392	1.57	1.408	0.765	0.732	1.151	0.816	1.38	1.406	0.892	2.102	1.141	0.738	1.235	1.62	1.193	1.173	0.685	1.658	1.388	1.205	1.082	0.787	1.342
Q99623	1.314	1.109	2.201	1.746	0.647	0.515	0.555	1.045	1.982	2.055	1.183	2.024	1.416	0.682	0.428	0.98	1.706	2.249	1.486	1.15	0.787	1.782	1.188	1.478	0.703	1.287	1.405	1.321	0.739	0.659	1.04	0.73	1.302	1.256	0.854	1.902	1.041	0.663	1.163	1.35	1.037	1.166	0.669	1.76	1.172	1.134	1.007	0.764	1.236
P13674	1.554	1.348	2.639	2.097	0.773	0.624	0.643	1.229	2.387	2.595	1.532	2.839	1.912	0.894	0.552	1.259	2.456	3.015	1.878	1.425	1.009	2.241	1.628	1.865	0.874	1.722	1.754	1.62	0.898	0.808	1.279	0.903	1.577	1.516	1.074	2.405	1.364	0.85	1.529	1.904	1.451	1.516	0.848	2.168	1.548	1.446	1.267	0.975	1.617
P05556	1.214	1.092	1.945	1.58	0.625	0.467	0.512	0.961	1.763	2.16	1.145	1.9	1.397	0.713	0.393	0.867	1.635	2.099	1.434	1.16	0.734	1.665	1.159	1.429	0.654	1.146	1.387	1.318	0.724	0.619	1.03	0.753	1.339	1.262	0.848	1.874	0.98	0.617	1.057	1.335	1.003	1.004	0.529	1.574	1.116	1.107	1.006	0.698	1.222
H0YIV4	1.323	1.159	2.221	1.829	0.651	0.513	0.609	1.147	2.127	2.251	1.405	2.548	1.804	0.863	0.506	1.225	2.121	2.721	1.847	1.319	0.859	1.971	1.425	1.641	0.769	1.254	1.52	1.585	0.858	0.754	1.228	0.813	1.454	1.322	0.886	2.215	1.156	0.683	1.217	1.548	1.146	1.069	0.631	1.612	1.288	1.245	1.105	0.774	1.453
P23246	1.131	0.897	1.802	1.364	0.535	0.439	0.46	0.831	1.617	2	0.999	1.792	1.217	0.645	0.375	0.869	1.514	1.983	1.445	1.028	0.722	1.684	1.128	1.361	0.624	1.187	1.379	1.208	0.701	0.602	0.977	0.698	1.233	1.212	0.813	1.881	1.165	0.604	1.19	1.598	1.044	1.123	0.664	1.814	1.175	1.302	1.059	0.856	1.549
Q9Y613	1.364	1.183	2.252	1.69	0.724	0.587	0.636	1.034	2.11	2.07	1.268	2.267	1.726	0.76	0.466	1.01	1.93	2.524	1.389	1.097	0.82	1.688	1.207	1.458	0.676	1.276	1.457	1.29	0.778	0.662	1.088	0.812	1.477	1.442	0.938	2.095	1.059	0.66	1.177	1.449	1.156	1.259	0.7	1.829	1.232	1.149	0.997	0.738	1.275
P40925	1.29	1.109	2.081	1.658	0.638	0.467	0.516	0.948	1.836	2.086	1.258	2.208	1.469	0.69	0.399	0.962	1.888	2.286	1.498	1.199	0.786	1.817	1.229	1.514	0.679	1.277	1.429	1.333	0.733	0.654	1.018	0.734	1.272	1.22	0.829	1.843	1.062	0.681	1.143	1.402	1.062	1.077	0.611	1.634	1.188	1.124	1.012	0.733	1.258
P14598	1.324	1.118	2.195	1.712	0.649	0.489	0.537	0.943	1.917	2.268	1.324	2.361	1.619	0.781	0.485	0.951	1.935	2.48	1.5	1.157	0.824	1.867	1.263	1.544	0.73	1.391	1.437	1.396	0.765	0.72	1.091	0.738	1.317	1.274	0.905	1.977	1.12	0.662	1.209	1.419	1.126	1.247	0.711	1.884	1.213	1.225	1.102	0.795	1.355
Q9UI08	1.43	1.205	2.466	1.89	0.723	0.606	0.627	1.078	2.176	2.47	1.309	2.324	1.558	0.803	0.455	1.06	2.145	2.378	1.788	1.253	0.906	2.09	1.393	1.771	0.734	1.475	1.808	1.441	0.778	0.688	1.103	0.824	1.46	1.401	0.965	1.948	1.134	0.728	1.235	1.532	1.17	1.22	0.681	1.875	1.247	1.284	1.107	0.894	1.381
Q9Y266	1.296	1.126	2.202	1.721	0.678	0.518	0.595	0.998	1.98	2.289	1.287	2.324	1.6	0.789	0.461	1.033	2.018	2.546	1.525	1.168	0.808	1.863	1.274	1.608	0.697	1.337	1.588	1.371	0.76	0.664	1.094	0.782	1.363	1.32	0.889	2.033	1.081	0.677	1.227	1.49	1.107	1.178	0.667	1.856	1.254	1.169	1.038	0.788	1.305
P22695	1.414	1.201	2.362	1.838	0.717	0.536	0.579	1.032	2.138	2.432	1.317	2.244	1.586	0.815	0.504	1.097	1.942	2.501	1.548	1.271	0.92	2.081	1.385	1.769	0.821	1.546	1.783	1.469	0.827	0.746	1.161	0.855	1.504	1.462	0.988	2.18	1.218	0.782	1.328	1.61	1.25	1.335	0.808	1.989	1.46	1.234	1.105	0.855	1.424
A0A087X188	1.348	1.164	2.169	1.664	0.706	0.557	0.577	1.006	2.033	2.359	1.249	2.099	1.542	0.836	0.506	1.042	1.944	2.426	1.627	1.189	0.907	1.859	1.246	1.593	0.763	1.402	1.429	1.377	0.771	0.701	1.141	0.839	1.605	1.488	1.027	2.136	1.035	0.655	1.195	1.452	1.131	1.258	0.665	1.919	1.257	1.17	1.057	0.771	1.337
P36873	1.505	1.18	1.74	1.474	0.776	0.631	0.702	1.216	1.844	2.329	1.063	1.509	1.149	0.679	0.488	0.892	1.319	1.802										1.424	0.802	0.761	1.115	0.816	1.776	1.676	1.023	2.262										1.375	1.145	0.931	1.593
P14550	1.323	1.138	2.003	1.588	0.666	0.541	0.588	0.947	1.841	2.101	1.238	2.061	1.49	0.733	0.454	0.99	1.763	2.197	1.393	1.163	0.78	1.818	1.275	1.547	0.742	1.354	1.487	1.33	0.764	0.682	1.081	0.772	1.382	1.276	0.862	2.007	1.049	0.681	1.137	1.415	1.08	1.098	0.622	1.65	1.186	1.144	1.048	0.78	1.347
P15531	1.323	0.979	1.076	0.844	0.839	0.749	0.928	0.58	0.956	3.053	0.833	1.062	0.786	0.904	0.553	1.028	1.074	1.302	1.604	1.198	0.871	1.871	1.327	1.503	0.713	1.29	1.118	1.62	0.937	0.682	1.273	0.979	1.449	1.543	0.888	1.812	1.14	0.742	1.248	1.614	1.272	1.157	0.66	1.977	1.113	1.198	1.006	0.626	1.371
G3V3H3	1.313	1.143	2.184	1.651	0.663	0.499	0.531	1.022	1.954	1.975	1.268	2.149	1.525	0.708	0.422	0.915	2.063	2.354	1.386	1.153	0.795	1.847	1.304	1.586	0.754	1.356	1.653	1.358	0.73	0.673	1.052	0.805	1.35	1.291	0.891	2.002	1.112	0.717	1.193	1.498	1.1	1.187	0.684	1.75	1.326	1.146	1.076	0.8	1.307
Q9H4A4	1.383	1.192	2.411	1.88	0.736	0.541	0.566	1.082	2.174	2.126	1.385	2.489	1.713	0.755	0.499	1.087	2.09	2.699	1.516	1.19	0.828	1.843	1.285	1.603	0.764	1.349	1.642	1.388	0.766	0.705	1.104	0.785	1.376	1.384	0.894	2.132	1.052	0.683	1.174	1.41	1.102	1.155	0.706	1.708	1.316	1.194	1.062	0.819	1.323
P43686	1.259	1.095	2.043	1.593	0.659	0.484	0.554	0.885	1.843	2.08	1.249	2.238	1.624	0.75	0.446	0.961	1.764	2.658	1.455	1.136	0.797	1.762	1.203	1.445	0.691	1.232	1.452	1.329	0.739	0.677	1.04	0.759	1.313	1.287	0.862	1.983	1.037	0.677	1.119	1.389	1.084	1.112	0.663	1.65	1.2	1.1	1.009	0.735	1.227
Q16822	1.232	1.017	2.089	1.531	0.653	0.534	0.562	0.909	1.966	1.909	1.17	2.029	1.481	0.685	0.438	0.99	1.738	2.279	1.199	1.1	0.766	1.635	1.2	1.523	0.74	1.288	1.437	1.181	0.704	0.648	0.974	0.721	1.337	1.26	0.852	1.87	0.963	0.591	1.061	1.277	0.974	1.095	0.632	1.585	1.126	1.029	0.935	0.733	1.173
P45880	1.146	1.061	1.815	1.515	0.643	0.504	0.521	0.812	1.83	1.917	1.066	1.821	1.29	0.691	0.429	0.858	1.591	2.143	1.395	1.089	0.7	1.819	1.081	1.38	0.632	1.167	1.369	1.216	0.713	0.647	1.032	0.665	1.299	1.258	0.802	2.027	0.903	0.614	0.923	1.178	0.85	1.001	0.557	1.494	1.03	1.001	0.895	0.649	1.185
O00148	1.207	1.024	2.023	1.556	0.628	0.516	0.56	0.947	1.85	2.27	1.154	1.983	1.374	0.731	0.509	0.935	1.685	2.21	1.634	1.144	0.782	1.819	1.162	1.466	0.668	1.25	1.509	1.324	0.752	0.66	1.057	0.735	1.319	1.244	0.916	1.91	1.087	0.646	1.264	1.436	1.092	1.236	0.658	1.903	1.258	1.178	1.063	0.817	1.288
P23526	1.287	1.1	2.052	1.626	0.658	0.482	0.538	0.935	1.835	2.186	1.276	2.223	1.586	0.748	0.467	1.113	1.929	2.432	1.493	1.204	0.831	1.905	1.27	1.59	0.761	1.362	1.537	1.381	0.751	0.682	1.075	0.756	1.335	1.27	0.851	1.997	1.066	0.684	1.173	1.39	1.083	1.144	0.674	1.704	1.202	1.155	1.042	0.77	1.303
Q00722	1.385	1.151	2.248	1.691	0.742	0.582	0.64	1.099	2.133	1.88	1.395	2.502	1.66	0.733	0.39	1.226	2.162	2.674	1.224	1.268	0.898	1.987	1.376	1.821	0.851	1.501	1.721	1.432	0.809	0.77	1.213	0.791	1.421	1.42	0.914	2.251	1.082	0.703	1.19	1.474	1.156	1.179	0.734	1.666	1.37	1.206	1.027	0.821	1.302
O43747	1.363	1.165	2.232	1.662	0.697	0.562	0.587	1.039	1.956	2.047	1.308	2.298	1.628	0.726	0.467	1.059	2.054	2.549	1.372	1.171	0.826	1.79	1.295	1.536	0.781	1.355	1.499	1.264	0.741	0.681	1.017	0.73	1.255	1.25	0.841	1.885	1.066	0.708	1.173	1.445	1.083	1.138	0.711	1.692	1.198	1.106	1.035	0.766	1.236
Q7Z6Z7	1.563	1.394	2.814	2.162	0.833	0.637	0.556	1.24	2.509	1.858	1.119	1.824	1.357	0.667	0.386	0.888	1.652	2.037	1.515	1.222	0.879	1.966	1.292	1.603	0.799	1.401	1.549	1.275	0.769	0.708	1.066	0.801	1.343	1.348	0.887	2.047	0.962	0.612	1.158	1.29	1.07	1.124	0.677	1.521	1.126	1.149	1.101	0.822	1.33
P31930	1.419	1.263	2.425	1.861	0.785	0.622	0.679	1.127	2.227	2.364	1.309	2.248	1.572	0.805	0.479	1.27	2.177	2.538	1.574	1.238	0.866	2.097	1.375	1.805	0.767	1.459	1.79	1.511	0.868	0.771	1.275	0.862	1.6	1.498	1.055	2.356	1.136	0.725	1.284	1.647	1.204	1.28	0.751	1.93	1.423	1.261	1.117	0.773	1.412
O60313	1.412	1.19	2.43	1.847	0.72	0.576	0.582	1.115	2.179	2.321	1.389	2.39	1.68	0.811	0.511	1.079	2.105	2.611	1.597	1.183	0.881	1.904	1.297	1.612	0.752	1.397	1.57	1.336	0.77	0.708	1.066	0.796	1.41	1.325	0.929	2.086	1.044	0.685	1.138	1.422	1.083	1.147	0.663	1.675	1.235	1.217	1.113	0.828	1.37
P11387	1.196	0.906	1.777	1.228	0.512	0.395	0.423	0.728	1.477	1.983	1.067	1.733	1.169	0.579	0.347	0.782	1.452	1.882	1.281	1.072	0.684	1.569	1.016	1.456	0.666	1.129	1.441	1.297	0.674	0.607	0.983	0.617	1.135	1.116	0.769	1.775	0.966	0.644	1.063	1.288	0.981	1.01	0.569	1.457	1.063	1.08	0.952	0.77	1.228
P56192	1.168	1.055	2.058	1.602	0.618	0.457	0.512	0.875	1.856	2.049	1.245	2.198	1.537	0.766	0.457	0.981	1.867	2.414	1.206	1.072	0.738	1.591	1.12	1.498	0.736	1.244	1.603	1.116	0.677	0.614	0.906	0.686	1.168	1.135	0.765	1.814	0.926	0.655	1.111	1.227	1.027	1.072	0.611	1.549	1.189	1.08	0.958	0.743	1.213
P60228	1.322	1.133	2.345	1.785	0.68	0.491	0.551	0.992	2.087	2.136	1.298	2.195	1.596	0.693	0.461	1.041	2.069	2.473	1.469	1.23	0.851	2.009	1.296	1.715	0.791	1.422	1.728	1.4	0.777	0.717	1.174	0.822	1.445	1.396	0.928	2.165	1.075	0.709	1.21	1.468	1.125	1.195	0.684	1.844	1.275	1.18	1.054	0.79	1.295
P09622	1.227	1.033	1.788	1.407	0.607	0.479	0.581	0.907	1.697	2.108	1.178	1.961	1.317	0.691	0.415	0.947	1.68	2.118	1.457	1.152	0.777	1.775	1.206	1.493	0.671	1.219	1.43	1.308	0.68	0.617	1	0.663	1.204	1.156	0.735	1.844	1.056	0.662	1.124	1.386	1.029	1.048	0.597	1.669	1.199	1.098	1.051	0.754	1.27
Q9Y5X3	1.27	1.117	2.156	1.724	0.652	0.478	0.497	1.028	1.887	1.95	1.298	2.294	1.61	0.735	0.441	0.943	1.859	2.455	1.453	1.182	0.817	1.813	1.302	1.607	0.751	1.338	1.512	1.388	0.758	0.7	1.084	0.781	1.353	1.306	0.875	2.02	1.051	0.714	1.167	1.406	1.098	1.133	0.639	1.642	1.22	1.152	1.066	0.757	1.346
P35580																			1.634	1.05	0.893	1.793	1.23	1.405	0.571	1.336	1.625										0.96	0.735	1.119	1.24	0.977	1.1	0.667	1.661	1.093	1.264	1.109	0.785	1.32
A0A087WWU8	1.302	1.033	1.701	1.339	0.637	0.566	0.567	1.112	1.708	2.234	1.082	1.655	1.282	0.717	0.437	1.136	1.634	1.95	1.603	1.112	0.787	1.706	1.268	1.445	0.675	1.269	1.499	1.366	0.772	0.645	1.07	0.794	1.469	1.412	0.902	2.025	1.042	0.686	1.176	1.543	1.179	1.274	0.588	1.895	1.289	1.161	1.08	0.793	1.434
Q9NR30	1.306	1.052	1.821	1.398	0.641	0.513	0.548	0.879	1.769	2.249	1.131	1.859	1.323	0.703	0.419	0.874	1.621	2.283	1.436	1.131	0.755	1.723	1.164	1.381	0.711	1.235	1.408	1.324	0.758	0.638	1.054	0.717	1.247	1.257	0.846	1.932	1.16	0.736	1.279	1.547	1.241	1.269	0.751	1.825	1.209	1.274	1.131	0.962	1.501
P05388	1.26	0.994	1.993	1.528	0.605	0.441	0.499	0.839	1.668	2.031	1.227	2.148	1.497	0.697	0.413	0.902	1.754	2.223	1.562	1.173	0.798	1.795	1.251	1.472	0.693	1.217	1.411	1.418	0.778	0.681	1.07	0.719	1.232	1.186	0.796	1.985	1.032	0.641	1.116	1.336	1.001	1.014	0.607	1.54	1.076	1.062	1.023	0.706	1.173
P41091	1.32	1.084	2.094	1.667	0.628	0.486	0.534	0.902	1.85	2.022	1.206	2.097	1.488	0.691	0.404	0.91	1.808	2.282	1.403	1.135	0.78	1.741	1.146	1.472	0.69	1.235	1.436	1.164	0.669	0.6	0.913	0.633	1.164	1.078	0.724	1.676	1.053	0.68	1.155	1.358	1.057	1.16	0.675	1.689	1.21	1.139	1.03	0.803	1.287
P53992	1.3	1.123	2.379	1.811	0.707	0.54	0.548	1.073	2.178	2.062	1.337	2.307	1.6	0.751	0.467	0.974	1.944	2.527	1.569	1.221	0.843	1.946	1.281	1.54	0.746	1.293	1.583	1.326	0.76	0.676	1.09	0.766	1.325	1.33	0.892	2.013	1.076	0.704	1.186	1.451	1.099	1.159	0.666	1.77	1.237	1.142	1.061	0.775	1.268
Q8TEM1	1.27	1.08	2.146	1.631	0.723	0.562	0.563	0.928	1.955	1.754	1.124	2.057	1.501	0.609	0.444	1.014	1.751	2.249	1.252	1.074	0.804	1.755	1.175	1.585	0.75	1.323	1.516	1.231	0.717	0.649	1.031	0.705	1.298	1.268	0.874	1.836	0.919	0.506	0.884	1.194	0.852	1.053	0.59	1.532	1.149	1.06	0.83	0.613	1.179
Q9BY44	1.345	1.141	2.265	1.804	0.681	0.51	0.517	1.023	2.052	2.346	1.306	2.228	1.606	0.746	0.437	0.964	1.944	2.442	1.54	1.287	0.908	2.086	1.423	1.745	0.842	1.588	1.68	1.487	0.822	0.767	1.229	0.897	1.518	1.472	1.031	2.245	1.156	0.708	1.222	1.573	1.163	1.266	0.711	1.943	1.301	1.203	1.104	0.836	1.409
O60488	1.397	1.178	2.24	1.789	0.776	0.586	0.612	1.051	2.076	2.036	1.366	2.353	1.636	0.692	0.483	1.016	1.95	2.678	1.426	1.28	0.89	2.125	1.44	1.8	0.863	1.59	1.738	1.529	0.829	0.738	1.147	0.831	1.52	1.464	1.013	2.178	1.345	0.825	1.432	1.811	1.389	1.403	0.907	2.087	1.535	1.532	1.293	0.991	1.815
Q6NUK1	1.258	1.111	2.09	1.665	0.659	0.503	0.556	0.941	1.929	1.9	1.2	2.131	1.503	0.665	0.411	0.967	1.891	2.404	1.378	1.167	0.812	1.817	1.275	1.62	0.755	1.35	1.5	1.336	0.752	0.682	1.06	0.752	1.352	1.303	0.864	2.056	1.045	0.67	1.114	1.512	1.083	1.096	0.63	1.686	1.259	1.145	1.026	0.736	1.327
Q14103	1.32	0.964	2.032	1.557	0.578	0.422	0.558	0.846	1.648	2.454	1.169	1.903	1.32	0.698	0.503	0.821	1.522	1.921	1.866	1.22	0.805	1.854	1.192	1.52	0.721	1.271	1.277	1.456	0.82	0.687	1.093	0.74	1.313	1.285	0.832	1.899	1.12	0.642	1.164	1.427	1.068	1.11	0.647	1.683	1.183	1.136	1.02	0.743	1.266
P62140	1.438	1.1	2.319	1.666	0.704	0.493	0.589	0.974	1.985	1.786	1.155	1.96	1.399	0.54	0.483	1.109	2.042	2.341										1.343	0.865	0.746	1.085	0.832	1.566	1.343	1.009	2.042	1.117	0.711	1.217	1.457	1.111	1.251	0.8	1.766	1.35	1.268	1.162	0.863	1.554
Q9NTJ5	1.333	1.125	2.107	1.698	0.681	0.508	0.524	1.002	1.921	2.057	1.279	2.208	1.549	0.747	0.481	1.022	1.876	2.421	1.501	1.255	0.864	1.961	1.328	1.631	0.797	1.42	1.686	1.398	0.797	0.718	1.135	0.825	1.474	1.396	0.969	2.045	1.121	0.721	1.185	1.446	1.126	1.207	0.71	1.798	1.256	1.165	1.014	0.795	1.31
P24752	1.305	1.045	1.955	1.522	0.624	0.472	0.508	0.911	1.759	2.16	1.185	1.956	1.397	0.737	0.452	0.869	1.55	2.16	1.471	1.19	0.799	1.782	1.181	1.507	0.727	1.289	1.347	1.385	0.755	0.668	1.054	0.722	1.335	1.29	0.884	1.986	0.992	0.633	1.044	1.295	0.937	1.051	0.578	1.652	1.112	1.066	0.987	0.724	1.239
A0A087X1Z3	1.51	1.251	2.407	1.806	0.682	0.57	0.684	1.038	2.077	2.332	1.228	2.145	1.574	0.792	0.458	1.141	2.116	2.347	1.491	1.25	0.867	1.933	1.271	1.659	0.735	1.343	1.564	1.637	0.863	0.779	1.251	0.941	1.636	1.637	1.042	2.375	1.224	0.742	1.155	1.608	1.181	1.162	0.653	1.848	1.393	1.301	1.217	0.802	1.502
Q9NUQ9	1.304	1.183	2.203	1.689	0.712	0.533	0.577	1.088	1.991	2.088	1.184	2.063	1.528	0.757	0.421	1.095	1.883	2.297	1.393	1.174	0.829	1.824	1.258	1.562	0.705	1.504	1.64	1.333	0.752	0.694	1.104	0.806	1.448	1.387	0.931	2.039	0.998	0.656	1.184	1.443	1.097	1.19	0.625	1.785	1.274	1.1	1.003	0.696	1.262
Q16719	1.5	1.291	2.543	1.978	0.772	0.54	0.583	1.167	2.301	2.116	1.472	2.487	1.767	0.76	0.501	1.118	2.22	2.774	1.528	1.267	0.888	1.984	1.401	1.719	0.865	1.486	1.708	1.542	0.854	0.749	1.246	0.888	1.512	1.49	0.989	2.211	1.231	0.81	1.379	1.689	1.327	1.302	0.799	1.951	1.401	1.401	1.31	0.908	1.568
Q92896	1.118	1.02	2.037	1.536	0.674	0.518	0.569	0.955	1.869	1.947	1.143	1.868	1.303	0.717	0.397	0.885	1.651	1.994	1.398	1.079	0.758	1.648	1.133	1.365	0.645	1.216	1.28	1.18	0.772	0.627	0.951	0.724	1.299	1.287	0.867	1.898	1.009	0.676	1.198	1.487	1.09	1.223	0.676	1.872	1.203	1.109	1.017	0.773	1.25
O95202	1.391	1.232	2.311	1.804	0.747	0.562	0.576	1.039	2.164	2.06	1.269	2.225	1.589	0.717	0.49	1.008	1.894	2.5	1.197	1.166	0.793	1.732	1.287	1.544	0.823	1.313	1.471	1.377	0.759	0.695	1.071	0.778	1.359	1.338	0.85	2.021	1.045	0.674	1.155	1.405	1.067	1.131	0.652	1.675	1.248	1.168	1.072	0.761	1.291
Q9NTK5	1.312	1.114	2.081	1.624	0.641	0.5	0.571	1.002	1.849	2.383	1.312	2.303	1.586	0.755	0.439	1.019	2.095	2.433	1.483	1.2	0.81	1.876	1.239	1.507	0.729	1.296	1.539	1.43	0.785	0.703	1.143	0.782	1.411	1.342	0.882	2.103	1.127	0.689	1.203	1.519	1.141	1.155	0.674	1.751	1.277	1.226	1.055	0.774	1.315
Q9BUJ2	1.287	1.087	2.104	1.607	0.679	0.528	0.589	1	1.936	2.171	1.24	2.065	1.457	0.725	0.443	1.034	1.85	2.27	1.476	1.12	0.806	1.848	1.197	1.567	0.709	1.321	1.51	1.29	0.737	0.651	1.035	0.749	1.337	1.279	0.875	1.972	1.048	0.655	1.143	1.354	1.044	1.124	0.644	1.707	1.174	1.144	0.985	0.761	1.255
B4DY09	1.224	0.997	2.007	1.533	0.58	0.413	0.436	0.865	1.671	1.918	1.286	2.263	1.522	0.652	0.383	0.913	1.707	2.291	1.253	1.132	0.797	1.753	1.239	1.469	0.746	1.295	1.416	1.292	0.752	0.674	1.029	0.748	1.233	1.198	0.835	1.872	1.089	0.693	1.185	1.433	1.117	1.15	0.701	1.537	1.177	1.15	1.041	0.769	1.234
P38919	1.24	1.08	2.207	1.752	0.635	0.485	0.459	1.014	1.975	1.89	1.226	2.299	1.565	0.653	0.462	0.992	1.962	2.437	1.489	1.154	0.783	1.806	1.239	1.529	0.72	1.309	1.504	1.259	0.719	0.649	1.059	0.693	1.253	1.198	0.79	1.901	1.08	0.657	1.192	1.494	1.125	1.163	0.688	1.781	1.267	1.149	1.01	0.757	1.29
Q13618	1.241	1.124	2.155	1.666	0.705	0.559	0.55	1.01	1.945	1.945	1.195	2.072	1.492	0.695	0.43	0.992	1.895	2.263	1.386	1.135	0.813	1.692	1.209	1.462	0.737	1.242	1.429	1.257	0.71	0.634	0.975	0.735	1.251	1.214	0.82	1.861	0.971	0.671	1.148	1.317	1.067	1.155	0.67	1.687	1.258	1.133	1.028	0.803	1.241
P31150	1.191	1.125	2.121	1.575	0.647	0.535	0.578	1.024	1.968	1.717	1.362	2.667	1.834	0.758	0.383	1.34	2.396	2.805	1.529	1.159	0.863	1.862	1.288	1.51	0.796	1.328	1.523	1.305	0.825	0.684	1.169	0.772	1.545	1.372	0.973	1.938	1.108	0.628	1.303	1.539	1.156	1.186	0.697	1.966	1.27	1.239	1.055	0.835	1.308
Q99714	1.3	1.163	2.281	1.788	0.718	0.607	0.628	1.019	2.095	2.056	1.253	2.283	1.616	0.699	0.5	0.865	2.009	2.586	1.433	1.132	0.795	1.784	1.206	1.633	0.77	1.374	1.47	1.357	0.767	0.722	1.09	0.764	1.433	1.374	0.982	2.135	1.011	0.657	1.146	1.427	1.111	1.152	0.663	1.751	1.336	1.098	1.059	0.784	1.257
O00203	1.372	1.143	2.175	1.673	0.675	0.554	0.592	0.977	2.022	2.049	1.235	2.284	1.592	0.805	0.479	1.056	1.876	2.433	1.357	1.157	0.753	1.75	1.248	1.548	0.791	1.345	1.599	1.267	0.766	0.676	0.965	0.764	1.264	1.264	0.863	1.827	1.04	0.699	1.172	1.381	1.088	1.142	0.7	1.61	1.287	1.109	1.05	0.783	1.256
O94973	1.263	1.111	2.152	1.692	0.648	0.497	0.478	0.906	1.896	1.658	1.298	2.12	1.5	0.644	0.437	0.996	1.983	2.354	1.418	1.065	0.718	1.651	1.145	1.402	0.694	1.254	1.244	1.262	0.7	0.655	1.002	0.754	1.25	1.272	0.821	1.896	0.954	0.631	1.031	1.307	1.065	1.027	0.656	1.484	1.169	1.15	1.023	0.725	1.236
Q13740	1.659	1.493	2.614	2.082	0.872	0.641	0.683	1.303	2.469	2.897	1.644	2.641	1.974	1.007	0.616	1.301	2.562	3.015	1.96	1.674	1.104	2.546	1.773	2.159	1.015	1.829	2.109	1.76	1.015	0.839	1.456	1.04	1.782	1.785	1.167	2.56	1.517	1.052	1.782	2.185	1.704	1.71	0.954	2.681	1.922	1.777	1.563	1.169	2.011
Q92900	1.366	1.188	2.396	1.842	0.761	0.618	0.658	1.056	2.274	2.427	1.19	2.035	1.523	0.808	0.525	1.009	1.856	2.421	1.424	1.184	0.838	1.862	1.251	1.67	0.791	1.401	1.654	1.279	0.701	0.664	0.996	0.747	1.376	1.283	0.884	1.992	1.043	0.686	1.197	1.344	1.074	1.174	0.683	1.678	1.242	1.148	1.043	0.769	1.292
Q6IBS0	1.299	1.144	2.313	1.815	0.673	0.508	0.556	0.983	2.025	2.135	1.235	2.175	1.506	0.743	0.422	0.926	1.765	2.358	1.496	1.149	0.774	1.748	1.199	1.416	0.684	1.25	1.313	1.356	0.731	0.658	1.041	0.744	1.267	1.226	0.799	1.876	1.005	0.642	1.122	1.374	1.042	1.056	0.631	1.624	1.179	1.101	0.988	0.743	1.239
A0A087X2I1	1.301	1.111	2.274	1.774	0.673	0.526	0.56	1.008	2.046	2.094	1.254	2.232	1.568	0.73	0.448	1.105	2.014	2.457	1.458	1.17	0.792	1.811	1.283	1.544	0.748	1.325	1.502	1.307	0.735	0.66	1.031	0.758	1.325	1.287	0.846	1.926	1.023	0.674	1.182	1.446	1.085	1.127	0.655	1.726	1.223	1.138	1.008	0.777	1.274
H7BXI1	1.335	1.175	2.312	1.789	0.73	0.591	0.623	1.064	2.108	2.253	1.361	2.37	1.671	0.789	0.493	1.06	2.078	2.632	1.453	1.231	0.872	1.884	1.307	1.64	0.811	1.424	1.674	1.365	0.819	0.712	1.151	0.805	1.461	1.434	0.935	2.265	1.078	0.717	1.209	1.482	1.145	1.245	0.707	1.79	1.295	1.132	1.013	0.787	1.25
P21964	1.304	1.149	2.404	1.878	0.638	0.469	0.524	1.107	2.146	2.05	1.342	2.479	1.692	0.719	0.449	1.143	2.185	2.68	1.428	1.17	0.815	1.928	1.364	1.638	0.748	1.346	1.695	1.387	0.751	0.674	1.119	0.775	1.328	1.261	0.872	2.058	0.985	0.655	1.119	1.418	1.065	1.057	0.632	1.538	1.198	1.138	1.021	0.736	1.245
P62701	1.275	1.022	1.977	1.526	0.581	0.448	0.507	0.843	1.705	2.1	1.208	2.146	1.439	0.7	0.414	0.875	1.682	2.272	1.47	1.198	0.838	1.902	1.249	1.579	0.723	1.316	1.504	1.349	0.763	0.674	1.069	0.755	1.319	1.252	0.836	1.975	1.037	0.642	1.132	1.397	1.041	1.106	0.657	1.627	1.159	1.113	1.016	0.746	1.202
Q15008	1.26	1.128	2.119	1.669	0.676	0.52	0.553	1.016	1.956	2.157	1.273	2.236	1.575	0.78	0.464	1.038	1.93	2.456	1.494	1.125	0.782	1.797	1.227	1.496	0.694	1.267	1.584	1.344	0.765	0.684	1.15	0.812	1.413	1.354	0.936	2.138	0.999	0.633	1.102	1.369	1.04	1.079	0.608	1.705	1.189	1.134	1.002	0.771	1.279
E9PKG1	1.432	1.133	2.359	1.838	0.69	0.536	0.619	1.015	2.07	2.375	1.348	2.304	1.632	0.763	0.463	0.976	1.9	2.457	1.606	1.214	0.814	1.886	1.267	1.576	0.729	1.325	1.462	1.369	0.76	0.669	1.076	0.735	1.311	1.249	0.832	2.002	1.141	0.731	1.239	1.528	1.132	1.2	0.723	1.786	1.288	1.18	1.074	0.799	1.342
Q16643	1.244	1.089	1.872	1.53	0.635	0.516	0.557	1.01	1.849	2.421	1.225	1.938	1.406	0.751	0.409	1.025	1.831	2.343	1.565	1.156	0.812	1.875	1.25	1.632	0.685	1.36	1.663	1.361	0.764	0.631	1.051	0.757	1.411	1.277	0.88	2.062	1.068	0.721	1.248	1.607	1.16	1.24	0.691	1.894	1.353	1.224	1.095	0.838	1.421
Q9HD20	1.392	1.218	2.414	1.884	0.747	0.616	0.696	1.132	2.261	2.355	1.225	2.025	1.484	0.869	0.478	1.13	1.858	2.312	1.639	1.183	0.853	1.9	1.435	1.613	0.785	1.493	1.624	1.283	0.763	0.653	0.989	0.74	1.357	1.339	0.869	1.997	1.002	0.628	1.151	1.38	1.075	1.113	0.692	1.739	1.192	1.121	1.017	0.765	1.271
P55010	1.277	1.128	2.167	1.675	0.644	0.52	0.551	1.016	1.983	2.2	1.092	1.822	1.356	0.672	0.474	0.905	1.723	2.104	1.544	1.197	0.832	1.881	1.241	1.563	0.75	1.322	1.551	1.435	0.786	0.686	1.12	0.781	1.413	1.428	0.908	2.121	1.051	0.64	1.116	1.405	1.045	1.078	0.593	1.707	1.208	1.152	1.057	0.738	1.325
Q96AG4	1.435	1.211	2.301	1.826	0.747	0.544	0.545	0.997	2.023	2.286	1.313	2.201	1.584	0.834	0.502	0.965	1.737	2.362	1.55	1.27	0.852	1.765	1.304	1.548	0.77	1.328	1.41	1.42	0.771	0.704	1.048	0.763	1.273	1.241	0.835	1.862	1.113	0.704	1.134	1.396	1.059	1.059	0.55	1.628	1.222	1.12	1.036	0.724	1.233
P15498	1.318	1.169	2.154	1.707	0.719	0.555	0.591	1.013	2.007	2.343	1.24	2.078	1.488	0.777	0.484	1.005	1.785	2.321	1.458	1.176	0.818	1.834	1.296	1.618	0.732	1.381	1.609	1.306	0.749	0.676	1.065	0.751	1.37	1.304	0.891	2.063	1.094	0.685	1.219	1.545	1.157	1.247	0.71	1.843	1.359	1.22	1.092	0.82	1.394
Q14258	1.429	1.212	2.235	1.797	0.745	0.568	0.622	1.025	1.972	2.473	1.281	2.047	1.503	0.818	0.497	1.031	1.891	2.294	1.717	1.284	0.941	2.075	1.357	1.669	0.836	1.438	1.568	1.526	0.886	0.799	1.2	0.857	1.507	1.449	0.959	2.13	1.156	0.71	1.245	1.492	1.161	1.212	0.742	1.839	1.259	1.271	1.113	0.829	1.367
Q8N163	1.327	1.117	2.135	1.647	0.689	0.543	0.596	0.998	1.976	1.91	1.144	1.876	1.373	0.646	0.405	0.912	1.675	2.109	1.584	1.167	0.835	1.793	1.244	1.532	0.745	1.324	1.467	1.335	0.783	0.694	1.082	0.788	1.345	1.341	0.895	2	1.045	0.696	1.217	1.446	1.117	1.231	0.732	1.807	1.256	1.155	1.021	0.774	1.314
P23284	1.235	0.979	1.974	1.507	0.566	0.419	0.505	0.751	1.661	2.406	1.209	2.052	1.394	0.731	0.456	0.843	1.661	2.156	1.635	1.134	0.728	1.754	1.117	1.417	0.639	1.134	1.328	1.344	0.702	0.618	0.979	0.665	1.171	1.156	0.758	1.789	1.028	0.617	1.077	1.307	0.957	1.054	0.587	1.631	1.107	1.072	0.979	0.702	1.183
Q09161	1.271	1.037	1.919	1.565	0.643	0.511	0.546	0.987	1.841	1.812	1.137	1.855	1.284	0.63	0.421	0.895	1.742	2.037	1.341	1.131	0.773	1.77	1.233	1.481	0.705	1.314	1.448	1.295	0.747	0.649	1.017	0.731	1.283	1.293	0.883	1.887	1.085	0.686	1.21	1.525	1.131	1.151	0.731	1.673	1.253	1.205	1.083	0.776	1.283
Q5JVZ5	1.326	1.129	2.239	1.792	0.701	0.52	0.565	0.984	2.061	2.148	1.232	2.157	1.537	0.758	0.511	1.055	1.906	2.413	1.559	1.229	0.835	1.878	1.287	1.592	0.757	1.35	1.541	1.348	0.758	0.704	1.088	0.804	1.383	1.396	0.918	1.979	1.11	0.705	1.215	1.467	1.132	1.166	0.688	1.811	1.193	1.183	1.063	0.776	1.29
Q99615	1.221	1.041	2.02	1.556	0.624	0.531	0.577	0.961	1.87	2.231	1.106	1.873	1.346	0.742	0.413	1.016	1.707	2.121	1.534	1.07	0.846	1.849	1.263	1.569	0.687	1.324	1.457	1.281	0.737	0.667	1.088	0.74	1.371	1.343	0.893	2.009	1.058	0.696	1.233	1.481	1.146	1.235	0.68	1.921	1.275	1.157	1.011	0.768	1.323
P55084	1.346	1.151	2.206	1.728	0.704	0.527	0.57	0.957	2.008	2.228	1.227	2.14	1.51	0.747	0.479	0.947	1.792	2.396	1.528	1.194	0.797	1.866	1.224	1.544	0.724	1.23	1.459	1.358	0.741	0.668	1.061	0.733	1.316	1.291	0.848	1.998	1.033	0.66	1.131	1.365	1.018	1.087	0.638	1.669	1.162	1.094	1.01	0.749	1.254
P35527	0.47	0.985	0.869	0.749	0.254	0.288	0.417	0.481	0.781	1.258	0.539	1.904	0.671	0.338	0.472	0.778	0.569	0.922	1.082	1.063	0.393	0.936	0.826	0.951	0.865	1.041	1.601	0.383	0.357	0.326	0.546	0.193	0.79	0.457	0.341	0.572	1.198	0.604	0.995	0.859	0.577	1.159	0.352	1.968	1.291	0.406	0.476	1.034	0.48
O43852	1.211	1.051	1.966	1.529	0.622	0.508	0.581	1.011	1.819	2.18	1.163	1.975	1.395	0.744	0.439	0.989	1.784	2.118	1.521	1.091	0.774	1.725	1.181	1.483	0.704	1.283	1.498	1.262	0.746	0.643	1.031	0.743	1.346	1.276	0.837	2.002	0.978	0.65	1.111	1.389	1.085	1.112	0.614	1.669	1.248	1.079	0.974	0.717	1.251
P01892	1.31	1.117	2.059	1.607	0.698	0.539	0.596	1.049	1.943	2.299	1.184	2.014	1.43	0.782	0.458	0.987	1.715	2.274	1.607	1.175	0.817	1.85	1.252	1.572	0.678	1.304	1.643	1.337	0.757	0.659	1.049	0.746	1.352	1.325	0.888	2.044	1.154	0.75	1.303	1.609	1.206	1.28	0.695	1.993	1.378	1.324	1.126	0.86	1.504
O60701	1.202	1.037	1.808	1.397	0.681	0.614	0.648	0.946	1.782	1.996	1.497	3.037	1.998	0.708	0.429	1.147	2.698	3.406	1.228	1.154	0.766	1.904	1.274	1.699	0.79	1.433	1.768	1.395	0.741	0.669	1.13	0.781	1.387	1.371	0.946	2.092	0.996	0.651	1.164	1.461	1.106	1.239	0.696	1.786	1.304	1.113	1	0.753	1.247
P48960	1.319	1.198	2.059	1.609	0.684	0.553	0.622	1.034	1.93	2.337	1.144	2.025	1.564	0.797	0.469	1.035	1.902	2.344	1.465	1.228	0.813	1.863	1.345	1.683	0.792	1.411	1.603	1.471	0.793	0.661	1.201	0.88	1.581	1.528	0.994	2.182	1.052	0.679	1.155	1.474	1.146	1.139	0.563	1.714	1.322	1.222	1.137	0.716	1.385
Q9UNM6	1.263	1.076	2.034	1.515	0.664	0.515	0.581	0.954	1.891	1.999	1.153	1.919	1.401	0.692	0.493	0.851	1.627	2.139	1.451	1.187	0.779	1.721	1.209	1.532	0.734	1.262	1.359	1.352	0.728	0.659	1.013	0.724	1.255	1.201	0.796	1.89	1.035	0.672	1.105	1.335	1.022	1.049	0.614	1.596	1.145	1.135	1.052	0.771	1.326
P30084	1.458	1.285	2.587	2.081	0.754	0.559	0.621	1.104	2.299	2.405	1.258	2.15	1.628	0.816	0.454	1.085	1.914	2.359	1.667	1.305	0.845	1.951	1.361	1.598	0.735	1.367	1.529	1.525	0.821	0.689	1.18	0.831	1.459	1.404	0.914	2.205	1.13	0.733	1.228	1.517	1.12	1.134	0.666	1.76	1.245	1.218	1.136	0.809	1.378
P00966	1.115	0.918	1.78	1.397	0.53	0.391	0.439	0.8	1.575	1.677	1.014	1.758	1.226	0.563	0.339	0.763	1.472	1.871	1.235	0.993	0.684	1.52	1.032	1.288	0.617	1.102	1.192	1.11	0.628	0.549	0.848	0.627	1.109	1.075	0.731	1.598	0.897	0.571	1.004	1.195	0.917	0.976	0.548	1.526	1.019	0.982	0.918	0.666	1.111
P40121	1.23	1.021	1.833	1.42	0.601	0.457	0.512	0.833	1.619	2.103	1.111	1.824	1.216	0.647	0.417	0.87	1.629	1.96	1.376	1.125	0.746	1.763	1.157	1.43	0.667	1.214	1.299	1.287	0.701	0.609	0.964	0.688	1.199	1.161	0.774	1.738	0.995	0.609	1.059	1.241	0.942	1.046	0.579	1.557	1.02	1.035	0.92	0.676	1.135
P12277	1.5	1.301	2.482	1.957	0.795	0.612	0.65	1.172	2.317	2.265	1.397	2.407	1.707	0.853	0.505	1.224	2.189	2.693	1.651	1.304	0.869	1.986	1.426	1.691	0.829	1.435	1.599	1.439	0.822	0.754	1.174	0.871	1.503	1.43	0.985	2.183	1.195	0.778	1.295	1.631	1.287	1.235	0.777	1.752	1.365	1.27	1.162	0.867	1.438
P62191	1.297	1.179	2.278	1.84	0.724	0.532	0.567	1.066	2.122	2.056	1.267	2.117	1.562	0.718	0.441	1.032	1.898	2.338	1.496	1.179	0.829	1.904	1.223	1.54	0.732	1.32	1.582	1.369	0.762	0.693	1.068	0.779	1.418	1.351	0.92	2.081	1.043	0.666	1.122	1.373	1.07	1.14	0.64	1.676	1.196	1.15	1.056	0.772	1.289
Q86UE4	1.378	1.253	2.187	1.685	0.755	0.565	0.573	1.002	2.071	2.251	1.33	2.266	1.672	0.792	0.467	1.092	1.907	2.508	1.386	1.191	0.86	1.815	1.282	1.552	0.786	1.402	1.614	1.369	0.73	0.674	1.051	0.775	1.299	1.371	0.86	1.933	1.001	0.704	1.16	1.401	1.079	1.125	0.658	1.777	1.206	1.091	1.024	0.795	1.325
Q9BZF1	1.286	1.073	2.22	1.755	0.668	0.53	0.56	0.962	2.052	2.182	1.24	2.238	1.523	0.718	0.419	1.046	2.002	2.464	1.484	1.114	0.802	1.85	1.246	1.559	0.713	1.357	1.54	1.305	0.68	0.643	1.049	0.706	1.284	1.196	0.833	1.902	0.962	0.594	1.057	1.348	1.027	1.067	0.578	1.645	1.119	1.111	0.982	0.727	1.219
J3KN16	1.406	1.225	2.266	1.795	0.773	0.551	0.618	0.98	2.047	1.852	1.195	2.102	1.457	0.659	0.478	0.873	1.711	2.346	1.375	1.131	0.819	1.907	1.344	1.626	0.835	1.363	1.579	1.467	0.817	0.745	1.173	0.844	1.413	1.361	0.957	2.131	1.132	0.711	1.171	1.466	1.154	1.256	0.77	1.626	1.368	1.165	0.999	0.787	1.303
O15067	1.335	1.19	2.279	1.71	0.723	0.591	0.618	1.038	2.096	2.29	1.245	2.084	1.459	0.785	0.517	1.036	1.777	2.314	1.44	1.122	0.837	1.749	1.17	1.506	0.717	1.362	1.543	1.363	0.782	0.723	1.154	0.821	1.438	1.419	0.958	2.097	1.039	0.704	1.234	1.464	1.166	1.336	0.734	2.03	1.347	1.164	1.086	0.801	1.316
P52565	1.239	1.071	1.911	1.55	0.672	0.516	0.6	1.029	1.83	2.238	1.062	1.678	1.197	0.7	0.416	0.945	1.647	1.875	1.694	1.199	0.829	1.936	1.258	1.607	0.682	1.341	1.527	1.38	0.779	0.657	1.176	0.797	1.427	1.351	0.887	2.092	1.05	0.667	1.212	1.55	1.132	1.198	0.622	1.902	1.26	1.175	1.018	0.778	1.391
Q9Y3L3	1.323	1.226	2.349	1.78	0.707	0.568	0.592	1.108	2.109	2.37	1.429	2.461	1.832	0.896	0.496	1.124	2.045	2.718	1.515	1.204	0.84	1.819	1.255	1.589	0.703	1.337	1.631	1.487	0.841	0.686	1.208	0.861	1.435	1.444	0.894	2.148	1.076	0.688	1.196	1.49	1.091	1.12	0.632	1.838	1.255	1.191	1.098	0.767	1.371
Q13011	1.222	1.043	2.023	1.603	0.639	0.499	0.561	0.906	1.852	2.159	1.273	2.031	1.327	0.696	0.446	0.95	1.633	2.255	1.493	1.107	0.765	1.728	1.1	1.44	0.667	1.245	1.376	1.294	0.695	0.653	0.957	0.7	1.262	1.23	0.826	1.795	1.099	0.692	1.16	1.381	1.069	1.178	0.671	1.866	1.237	1.128	1.047	0.77	1.274
P09429	1.339	1.101	2.18	1.664	0.656	0.456	0.556	0.979	1.905	2.365	1.366	2.354	1.575	0.763	0.421	0.948	1.931	2.43	1.415	1.141	0.797	1.816	1.155	1.502	0.645	1.188	1.478	1.441	0.736	0.623	1.071	0.758	1.32	1.242	0.791	1.914	1.032	0.664	1.094	1.337	0.98	1.047	0.565	1.642	1.125	1.073	0.97	0.687	1.214
Q9H223	1.454	1.248	2.445	1.859	0.745	0.626	0.673	1.136	2.252	2.112	1.259	2.275	1.687	0.734	0.439	1.116	1.882	2.555	1.368	1.288	0.901	1.897	1.376	1.713	0.893	1.485	1.635	1.465	0.821	0.763	1.168	0.889	1.472	1.421	0.961	2.172	1.077	0.723	1.152	1.474	1.148	1.207	0.699	1.668	1.265	1.24	1.093	0.799	1.354
P39656	1.225	1.069	1.864	1.515	0.645	0.499	0.563	0.899	1.681	2.086	1.212	1.928	1.366	0.689	0.447	0.9	1.675	2.104	1.542	1.161	0.776	1.76	1.21	1.519	0.714	1.266	1.395	1.346	0.738	0.66	1.078	0.756	1.33	1.253	0.869	2.001	1.057	0.659	1.148	1.38	1.075	1.126	0.688	1.642	1.169	1.156	1.016	0.766	1.277
Q04917	1.256	1.065	1.999	1.605	0.595	0.445	0.478	1.038	1.832	1.92	1.188	2.139	1.493	0.683	0.403	0.966	1.768	2.279	1.464	1.152	0.741	1.755	1.272	1.539	0.724	1.293	1.439	1.335	0.746	0.679	1.035	0.76	1.302	1.302	0.841	1.957	1.092	0.691	1.175	1.521	1.161	1.15	0.629	1.69	1.281	1.239	1.146	0.822	1.407
P16885	1.499	1.275	2.404	1.852	0.723	0.545	0.498	1.073	2.175	2.269	1.23	2.207	1.619	0.839	0.54	1.021	1.876	2.512	1.458	1.202	0.877	1.876	1.366	1.7	0.8	1.466	1.63	1.384	0.817	0.784	1.115	0.78	1.43	1.318	0.921	2.114	1.131	0.742	1.224	1.514	1.147	1.244	0.737	1.762	1.323	1.121	1.035	0.778	1.238
P84077	1.287	1.129	2.284	1.846	0.674	0.509	0.583	1.043	2.121	2.262	1.2	2.105	1.471	0.754	0.494	1.008	1.945	2.227	1.948	1.184	0.784	1.926	1.228	1.555	0.724	1.292	1.436	1.394	0.747	0.662	1.096	0.763	1.358	1.317	0.913	1.983	1.02	0.651	1.146	1.383	1.058	1.136	0.645	1.76	1.19	1.16	1.034	0.75	1.252
J3KN67	1.196	0.982	1.823	1.403	0.561	0.436	0.475	0.956	1.561	1.989	1.228	2.073	1.396	0.657	0.414	0.96	1.831	2.153	1.319	1.096	0.742	1.626	1.13	1.43	0.619	1.171	1.407	1.302	0.691	0.604	1.005	0.724	1.273	1.183	0.796	1.802	1.044	0.713	1.098	1.373	1.019	1.051	0.558	1.582	1.149	1.11	1.028	0.712	1.264
A0A0C4DGB5	1.408	1.23	2.201	1.71	0.729	0.543	0.652	1.002	2.029	2.761	1.329	2.169	1.578	0.913	0.477	1.029	1.8	2.253	1.525	1.194	0.918	1.897	1.312	1.657	0.719	1.439	1.669	1.415	0.808	0.69	1.112	0.905	1.52	1.552	0.989	2.104	1.143	0.759	1.244	1.547	1.191	1.222	0.662	1.935	1.304	1.245	1.188	0.892	1.423
A0A1B0GTJ7	1.279	1.108	2.131	1.669	0.659	0.515	0.565	1.036	1.998	2.071	1.222	2.104	1.522	0.723	0.403	1.066	1.93	2.337	1.375	1.249	0.835	1.937	1.355	1.653	0.77	1.44	1.646	1.355	0.758	0.686	1.096	0.801	1.388	1.362	0.884	2.06	1.062	0.699	1.177	1.438	1.118	1.155	0.683	1.673	1.284	1.04	0.926	0.682	1.16
Q7L2H7	1.306	1.058	1.973	1.526	0.672	0.463	0.554	0.864	1.676	1.924	1.284	2.236	1.532	0.684	0.435	1.001	2.021	2.478	1.438	1.154	0.816	1.877	1.259	1.581	0.755	1.283	1.425	1.367	0.744	0.679	1.112	0.759	1.233	1.236	0.8	1.922	1.024	0.652	1.096	1.463	1.051	1.041	0.653	1.463	1.222	1.16	1.057	0.733	1.285
Q9BXJ9	1.4	1.185	2.34	1.811	0.691	0.535	0.558	1.078	2.102	2.081	1.238	2.174	1.511	0.705	0.401	1.077	2.031	2.42	1.353	1.197	0.862	1.915	1.325	1.69	0.77	1.397	1.774	1.368	0.766	0.685	1.064	0.779	1.453	1.373	0.91	2.081	1.101	0.712	1.207	1.464	1.049	1.18	0.674	1.804	1.309	1.197	1.051	0.784	1.344
Q02878	1.328	1.068	1.975	1.504	0.659	0.507	0.58	0.868	1.73	2.281	1.209	1.928	1.338	0.694	0.479	0.962	1.755	2.083	1.647	1.24	0.834	1.935	1.211	1.523	0.72	1.238	1.44	1.459	0.812	0.727	1.11	0.769	1.364	1.311	0.862	2.041	1.05	0.654	1.161	1.336	1.013	1.091	0.624	1.658	1.078	1.125	1.019	0.74	1.221
P21266	1.295	1.117	2.081	1.673	0.666	0.494	0.517	0.98	1.838	1.972	1.332	2.231	1.559	0.686	0.412	1.026	1.974	2.392	1.458	1.241	0.864	1.95	1.35	1.626	0.778	1.404	1.567	1.394	0.771	0.694	1.137	0.826	1.386	1.316	0.893	2.003	1.184	0.762	1.275	1.642	1.248	1.251	0.757	1.783	1.391	1.282	1.14	0.857	1.443
P25786	1.25	1.031	1.863	1.446	0.636	0.507	0.565	0.876	1.682	2.252	1.129	1.864	1.349	0.697	0.475	0.923	1.643	2.031	1.552	1.129	0.797	1.773	1.175	1.483	0.683	1.265	1.405	1.35	0.746	0.656	1.106	0.743	1.331	1.278	0.853	1.872	1.072	0.677	1.172	1.421	1.065	1.176	0.639	1.892	1.245	1.168	1.03	0.775	1.308
Q9UBE0	1.201	1.007	1.948	1.514	0.62	0.482	0.54	0.923	1.76	2.192	1.263	2.239	1.631	0.759	0.438	0.999	1.757	2.453	1.5	1.079	0.738	1.693	1.183	1.354	0.664	1.149	1.348	1.299	0.718	0.623	0.975	0.7	1.182	1.146	0.736	1.849	1.016	0.628	1.073	1.277	1.008	1.029	0.611	1.518	1.117	1.154	1.041	0.784	1.27
P23219	1.425	1.159	2.193	1.702	0.722	0.573	0.677	1.072	2.095	2.244	1.289	2.21	1.618	0.789	0.475	1.049	2.03	2.463	1.576	1.209	0.848	1.875	1.281	1.626	0.752	1.47	1.584	1.396	0.781	0.672	1.083	0.771	1.363	1.351	0.905	2.074	1.097	0.699	1.196	1.482	1.083	1.214	0.678	1.848	1.255	1.21	1.085	0.819	1.344
Q16181	1.225	0.992	1.953	1.541	0.592	0.485	0.532	0.967	1.806	2.287	1.13	1.947	1.371	0.775	0.434	0.952	1.672	2.206	1.616	1.073	0.809	1.832	1.186	1.516	0.694	1.313	1.511	1.25	0.682	0.6	0.972	0.705	1.252	1.231	0.811	1.855	0.978	0.602	1.123	1.321	1.002	1.057	0.608	1.671	1.102	1.125	0.975	0.753	1.238
E7EX17	1.277	1.042	1.761	1.362	0.653	0.544	0.601	0.91	1.674	2.367	1.18	1.91	1.416	0.795	0.489	0.928	1.713	2.246	1.472	1.114	0.839	1.811	1.194	1.52	0.691	1.332	1.539	1.381	0.781	0.66	1.095	0.835	1.478	1.469	0.995	2.025	1.116	0.719	1.273	1.527	1.153	1.278	0.65	2.077	1.272	1.204	1.077	0.812	1.371
Q05655	1.321	1.097	2.228	1.705	0.682	0.515	0.55	0.986	2.011	1.919	1.296	2.257	1.613	0.661	0.429	1	1.917	2.505	1.424	1.133	0.788	1.751	1.226	1.487	0.79	1.326	1.507	1.353	0.726	0.685	1.089	0.718	1.294	1.258	0.87	2.02	1.11	0.657	1.196	1.435	1.153	1.278	0.747	1.654	1.299	1.255	1.092	0.837	1.405
P34931																																					0.995	0.515	0.952	1.164	1.113	1.06	0.636	1.404	0.957
F8VV59										2.118	1.099	2.201	1.413	0.986	0.539	1.003	1.716	2.407	1.482	1.23	0.89	1.816	1.446	1.622	0.65	1.688	1.912																			0.981	0.913	0.683	1.185
O14818	1.29	1.062	1.971	1.527	0.629	0.497	0.573	0.964	1.822	2.234	1.136	1.897	1.349	0.673	0.435	1.013	1.887	2.061	1.488	1.157	0.787	1.84	1.257	1.579	0.719	1.366	1.452	1.36	0.743	0.658	1.059	0.777	1.389	1.333	0.877	2.007	1.019	0.656	1.102	1.395	1.032	1.087	0.596	1.711	1.195	1.117	1.043	0.727	1.31
E7EUC7	1.374	1.183	2.213	1.704	0.713	0.577	0.586	1.034	2.055	2.006	1.18	2.02	1.44	0.691	0.448	0.977	1.857	2.287	1.433	1.202	0.855	1.856	1.277	1.617	0.77	1.411	1.537	1.433	0.772	0.725	1.135	0.83	1.447	1.433	0.974	2.137	1.104	0.706	1.186	1.482	1.139	1.189	0.704	1.757	1.25	1.203	1.03	0.829	1.347
P09543	1.458	1.213	2.395	1.919	0.711	0.571	0.61	1.087	2.298	2.412	1.34	2.493	1.801	0.855	0.52	1.099	2.064	2.761	1.525	1.202	0.823	1.845	1.272	1.576	0.776	1.352	1.553	1.347	0.78	0.671	1.094	0.786	1.391	1.348	0.898	2.078	0.932	0.568	1.031	1.233	0.977	1.044	0.625	1.553	1.141	1.162	1.054	0.783	1.284
P54920	1.297	1.166	2.039	1.642	0.719	0.54	0.569	1.005	1.897	2.069	1.232	2.204	1.66	0.759	0.466	1.073	1.89	2.507	1.307	1.259	0.865	1.968	1.377	1.716	0.867	1.487	1.671	1.338	0.791	0.695	1.107	0.801	1.43	1.432	0.94	2.084	1.073	0.658	1.208	1.541	1.183	1.218	0.691	1.871	1.329	1.122	1.03	0.729	1.273
G3V180	1.305	1.102	2.031	1.577	0.683	0.51	0.586	0.909	1.888	2.158	1.306	2.161	1.536	0.786	0.504	1.087	1.921	2.477	1.535	1.177	0.848	1.797	1.26	1.538	0.751	1.332	1.389	1.298	0.753	0.662	1.015	0.724	1.306	1.272	0.822	1.992	1.071	0.677	1.185	1.384	1.141	1.265	0.686	1.816	1.252	1.127	1.026	0.792	1.331
Q14012	1.403	1.219	2.385	1.844	0.719	0.569	0.664	1.096	2.175	2.291	1.261	2.159	1.538	0.767	0.477	1.107	1.983	2.388	1.625	1.271	0.882	1.935	1.344	1.62	0.796	1.467	1.516	1.539	0.859	0.771	1.207	0.851	1.412	1.346	0.9	2.223	1.177	0.768	1.266	1.62	1.225	1.211	0.698	1.693	1.316	1.287	1.087	0.856	1.531
O00629	1.318	1.056	1.881	1.449	0.66	0.508	0.552	0.843	1.664	2.341	1.35	2.423	1.714	0.837	0.526	1.047	1.933	2.67	1.369	1.172	0.827	1.736	1.244	1.634	0.782	1.351	1.583	1.274	0.708	0.663	1.017	0.706	1.224	1.204	0.793	1.917	1.004	0.65	1.104	1.269	0.975	1.051	0.594	1.608	1.104	1.161	1.069	0.824	1.361
P01023	1.461	1.169	2.398	1.792	0.706	0.581	0.622	1.028	2.065	2.006	1.242	2.191	1.46	0.694	0.461	0.901	1.861	2.348	1.492	1.231	0.929	1.931	1.29	1.726	0.78	1.512	1.586	1.435	0.839	0.751	1.171	0.9	1.553	1.492	1.033	2.213	1.143	0.734	1.236	1.444	1.162	1.351	0.762	1.748	1.338	1.186	1.093	0.815	1.396
P07858	1.263	1.069	1.996	1.583	0.62	0.498	0.533	0.922	1.759	1.901	1.116	1.965	1.362	0.627	0.393	0.923	1.697	2.1	1.445	1.093	0.733	1.825	1.234	1.461	0.631	1.213	1.443	1.307	0.703	0.618	1.053	0.714	1.257	1.168	0.81	1.909	1.063	0.664	1.117	1.404	1.04	1.116	0.643	1.641	1.16	1.149	0.98	0.735	1.299
O15371	1.345	1.164	2.22	1.78	0.694	0.56	0.616	1.015	2.062	2.092	1.232	2.04	1.494	0.746	0.459	0.933	1.816	2.322	1.463	1.168	0.847	1.925	1.265	1.65	0.794	1.385	1.526	1.355	0.758	0.706	1.063	0.746	1.381	1.297	0.872	1.987	1.084	0.678	1.184	1.581	1.125	1.234	0.721	1.89	1.377	1.159	1.05	0.806	1.303
Q13617	1.287	1.108	2.221	1.678	0.691	0.583	0.604	1.078	2.107	2.172	1.302	2.355	1.585	0.792	0.462	1.131	2.157	2.663	1.413	1.148	0.811	1.869	1.299	1.645	0.784	1.427	1.714	1.372	0.799	0.707	1.126	0.8	1.477	1.413	0.978	2.136	1.017	0.659	1.166	1.45	1.072	1.142	0.683	1.743	1.262	1.086	1.002	0.764	1.25
P78417	1.279	1.027	1.793	1.339	0.569	0.437	0.501	0.904	1.501	2.05	1.173	1.968	1.459	0.701	0.438	0.934	1.718	2.085	1.533	1.222	0.773	1.735	1.27	1.488	0.661	1.163	1.424	1.414	0.753	0.634	1.07	0.798	1.312	1.291	0.836	1.984	1.07	0.673	1.132	1.46	1.033	1.006	0.561	1.595	1.191	1.157	1.07	0.731	1.26
P23396	1.278	1.02	1.98	1.526	0.609	0.459	0.531	0.814	1.701	2.172	1.151	1.956	1.348	0.681	0.431	0.862	1.581	2.096	1.65	1.217	0.809	1.802	1.176	1.515	0.685	1.266	1.361	1.327	0.734	0.672	0.989	0.679	1.242	1.192	0.795	1.92	1.072	0.687	1.19	1.406	1.027	1.132	0.624	1.827	1.169	1.149	1.065	0.788	1.273
Q562R1	1.837	1.412	3.048	2.383	0.951	0.603	0.618	1.247	2.283																												1.944	0.907	2.16	2.458	1.71	1.853	1.186	2.613	1.571	1.867	1.118	1.298	2.243
Q14683	1.203	1.049	1.834	1.449	0.628	0.478	0.499	0.851	1.748	2.057	1.166	1.839	1.359	0.689	0.406	0.887	1.634	2.172	1.443	1.125	0.804	1.776	1.128	1.467	0.714	1.291	1.492	1.234	0.718	0.634	0.969	0.705	1.281	1.256	0.842	1.896	1.028	0.653	1.19	1.363	1.07	1.186	0.656	1.748	1.175	1.167	1.042	0.829	1.288
P19971	1.449	1.232	2.507	1.941	0.739	0.562	0.63	1.172	2.3	2.045	1.439	2.563	1.827	0.756	0.439	1.246	2.397	2.851	1.338	1.246	0.858	1.94	1.394	1.709	0.866	1.463	1.738	1.383	0.806	0.713	1.126	0.819	1.445	1.369	0.919	2.103	1.093	0.714	1.2	1.519	1.147	1.138	0.727	1.692	1.341	1.174	1.099	0.784	1.35
P46777	1.319	1.081	2.342	1.843	0.629	0.464	0.526	1.051	2.084	1.968	1.258	2.304	1.558	0.641	0.39	1.031	2.011	2.403	1.518	1.229	0.867	1.983	1.288	1.631	0.708	1.33	1.597	1.423	0.804	0.71	1.121	0.78	1.418	1.346	0.882	2.095	1.076	0.663	1.188	1.461	1.075	1.114	0.656	1.719	1.185	1.174	1.053	0.757	1.311
Q96AE4	1.477	1.268	2.345	1.751	0.695	0.53	0.551	1.082	2.068	2.12	1.347	2.27	1.635	0.757	0.463	1.257	2.016	2.43	1.325	1.173	0.853	1.793	1.26	1.619	0.708	1.423	1.663	1.414	0.786	0.667	1.043	0.817	1.47	1.399	0.937	2.065	1.168	0.785	1.165	1.579	1.132	1.221	0.673	1.925	1.344	1.285	1.176	0.828	1.466
Q8N1F7	1.389	1.153	2.243	1.718	0.714	0.544	0.604	0.963	2.05	2.355	1.239	2.115	1.486	0.753	0.467	0.94	1.718	2.239	1.441	1.175	0.843	1.879	1.286	1.613	0.75	1.336	1.659	1.403	0.758	0.694	1.1	0.759	1.251	1.211	0.84	1.92	1.068	0.657	1.099	1.427	1.054	1.142	0.619	1.717	1.301	1.151	0.947	0.709	1.214
Q96RQ9	1.37	1.185	2.192	1.668	0.726	0.555	0.608	0.935	2.006	2.478	1.397	2.393	1.656	0.832	0.534	1.113	2.007	2.583	1.595	1.257	0.907	1.986	1.419	1.846	0.865	1.504	1.617	1.444	0.815	0.767	1.205	0.882	1.436	1.43	0.973	2.212	1.144	0.765	1.269	1.551	1.161	1.235	0.744	1.838	1.34	1.227	1.094	0.824	1.354
Q08945	1.245	1.158	2.203	1.571	0.68	0.516	0.535	0.898	1.826	2.011	1.207	1.912	1.31	0.648	0.393	0.919	1.652	2.11	1.39	0.979	0.676	1.424	0.939	1.319	0.667	1.018	1.179	1.322	0.641	0.55	0.986	0.652	1.049	1.025	0.697	1.754	1.013	0.636	1.181	1.331	1.016	1.101	0.695	1.583	1.115	1.088	0.972	0.746	1.221
Q66K74	1.337	1.05	2.087	1.603	0.697	0.535	0.549	0.967	1.879	2.291	1.318	2.172	1.568	0.816	0.493	0.992	1.829	2.423	1.575	1.298	0.877	1.953	1.331	1.64	0.764	1.345	1.549	1.367	0.739	0.709	1.09	0.795	1.392	1.349	0.9	2.007	1.086	0.669	1.161	1.361	1.058	1.158	0.65	1.733	1.233	1.147	1.067	0.793	1.341
P08648	1.388	1.196	2.199	1.676	0.744	0.563	0.677	1.009	2.049	2.258	1.219	2.244	1.591	0.802	0.452	1.016	1.885	2.461	1.493	1.208	0.847	1.892	1.347	1.613	0.777	1.39	1.538	1.474	0.832	0.701	1.127	0.86	1.483	1.458	0.949	2.106	1.065	0.66	1.112	1.424	1.072	1.118	0.645	1.735	1.222	1.121	1.056	0.721	1.248
P00387	1.359	1.201	2.28	1.797	0.693	0.528	0.574	1.021	2.03	2.359	1.263	2.115	1.495	0.734	0.436	1.054	2.03	2.338	1.657	1.235	0.839	1.915	1.244	1.644	0.736	1.342	1.608	1.416	0.807	0.735	1.172	0.781	1.473	1.357	0.948	2.2	1.124	0.803	1.228	1.574	1.17	1.219	0.705	1.833	1.376	1.262	1.035	0.822	1.379
Q9BWD1	1.338	1.166	2.26	1.814	0.707	0.521	0.565	0.938	2.068	2.33	1.323	2.248	1.667	0.792	0.481	0.992	1.816	2.503	1.54	1.198	0.798	1.839	1.221	1.517	0.739	1.291	1.456	1.431	0.814	0.737	1.148	0.835	1.434	1.353	0.921	2.159	1.004	0.639	1.095	1.386	1.075	1.083	0.614	1.648	1.209	1.14	1.029	0.751	1.238
P23368	1.351	1.155	2.235	1.665	0.708	0.535	0.587	0.981	2.045	2.136	1.371	2.36	1.66	0.74	0.505	1.078	2	2.628	1.283	1.212	0.848	1.81	1.359	1.707	0.808	1.442	1.62	1.32	0.755	0.698	1.072	0.773	1.391	1.318	0.937	2.012	1.086	0.72	1.186	1.476	1.164	1.265	0.709	1.771	1.284	1.15	1.042	0.764	1.274
P42765	1.164	1.063	2.009	1.546	0.613	0.505	0.533	0.899	1.898	2.008	1.115	1.876	1.303	0.682	0.449	0.834	1.562	2.131	1.403	1.077	0.754	1.628	1.173	1.366	0.657	1.234	1.333	1.316	0.69	0.623	1.021	0.701	1.289	1.238	0.827	1.946	0.899	0.613	1.083	1.266	0.948	1.046	0.566	1.629	1.116	1.008	0.958	0.744	1.136
P31689	1.293	1.067	1.979	1.539	0.659	0.495	0.55	0.979	1.829	2.371	1.235	2.04	1.463	0.794	0.443	0.918	1.731	2.304	1.528	1.16	0.806	1.821	1.189	1.514	0.687	1.253	1.453	1.366	0.762	0.673	1.068	0.759	1.353	1.317	0.903	1.961	1.084	0.706	1.24	1.453	1.111	1.245	0.679	1.88	1.277	1.205	1.051	0.797	1.295
Q12907	1.235	1.074	2.149	1.71	0.657	0.472	0.566	0.947	1.895	1.938	1.211	2.203	1.52	0.679	0.411	1.02	2.071	2.334	1.457	1.152	0.779	1.84	1.178	1.563	0.666	1.267	1.527	1.283	0.727	0.645	1.043	0.697	1.295	1.222	0.811	1.936	1.02	0.632	1.116	1.4	1.009	1.057	0.622	1.679	1.146	1.124	0.994	0.744	1.277
P43490	1.431	1.245	2.64	2.005	0.709	0.524	0.605	1.041	2.213	2.349	1.42	2.671	1.831	0.867	0.539	1.253	2.249	2.913	1.524	1.29	0.825	2.012	1.449	1.818	0.836	1.502	1.764	1.529	0.891	0.808	1.21	0.879	1.613	1.505	1.043	2.385	1.208	0.796	1.293	1.694	1.274	1.26	0.798	1.857	1.594	1.211	1.139	0.835	1.372
Q16543	1.325	1.125	2.226	1.723	0.67	0.506	0.579	1.064	2.027	2.213	1.354	2.495	1.708	0.816	0.488	1.117	1.986	2.612	1.456	1.223	0.878	1.945	1.389	1.701	0.767	1.418	1.763	1.381	0.758	0.663	1.096	0.786	1.36	1.294	0.873	2.016	1.081	0.693	1.196	1.541	1.138	1.137	0.624	1.747	1.278	1.209	1.059	0.803	1.332
P51148	1.358	1.184	2.306	1.844	0.705	0.569	0.619	1.08	2.19	2.384	1.347	2.364	1.602	0.785	0.511	1.081	2.044	2.618	1.617	1.219	0.882	2.02	1.272	1.705	0.77	1.434	1.678	1.417	0.781	0.702	1.109	0.776	1.394	1.409	0.936	2.096	1.097	0.712	1.214	1.462	1.131	1.271	0.694	1.9	1.32	1.146	1.042	0.772	1.316
P32969	1.285	1.124	2.311	1.798	0.686	0.497	0.632	0.987	2.053	2.328	1.321	2.288	1.575	0.795	0.458	0.982	1.743	2.407	1.561	1.183	0.794	1.803	1.262	1.549	0.698	1.264	1.462	1.375	0.769	0.688	1.071	0.732	1.324	1.249	0.841	1.979	1.017	0.635	1.153	1.37	1.075	1.118	0.664	1.58	1.127	1.128	1.058	0.776	1.236
Q9Y4E8	1.337	1.133	2.189	1.655	0.732	0.531	0.617	0.905	1.895	1.994	1.24	1.931	1.41	0.678	0.415	0.911	1.6	2.144	1.519	1.317	0.948	1.949	1.411	1.598	0.85	1.476	1.455	1.292	0.742	0.677	1.09	0.749	1.251	1.333	0.843	2.065	1.008	0.654	1.074	1.274	1.021	1.019	0.619	1.602	1.078	1.199	1.088	0.81	1.335
Q9Y617	0.903	0.728	1.502	1.153	0.419	0.307	0.335	0.66	1.273	1.364	0.942	1.804	1.223	0.504	0.301	0.732	1.619	1.916	0.979	0.867	0.568	1.273	0.914	1.105	0.554	1.003	1.127	0.986	0.534	0.473	0.742	0.542	0.937	0.92	0.618	1.393	0.773	0.495	0.841	1.015	0.789	0.806	0.477	1.219	0.931	0.813	0.732	0.562	0.912
Q9H2U2	1.349	1.184	2.274	1.736	0.698	0.576	0.603	1.102	2.051	2.29	1.314	2.228	1.586	0.788	0.485	1.052	2.03	2.511	1.455	1.26	0.86	1.961	1.344	1.628	0.798	1.427	1.557	1.438	0.797	0.72	1.138	0.819	1.429	1.436	0.94	2.134	1.101	0.706	1.231	1.484	1.118	1.176	0.688	1.764	1.274	1.193	1.085	0.793	1.409
Q9H845	1.237	1.043	2.028	1.59	0.624	0.475	0.563	0.964	1.863	1.975	1.321	2.259	1.619	0.761	0.456	1.066	1.94	2.474	1.571	1.112	0.798	1.744	1.189	1.471	0.64	1.19	1.424	1.25	0.697	0.64	0.985	0.727	1.3	1.231	0.806	1.902	1.028	0.668	1.186	1.411	1.085	1.138	0.689	1.676	1.248	1.124	1.01	0.742	1.249
P50502	1.273	0.957	1.775	1.361	0.556	0.441	0.558	1.078	1.543	2.259	1.135	1.755	1.207	0.673	0.445	0.857	1.688	1.868	1.576	1.18	0.812	1.789	1.228	1.546	0.693	1.309	1.409	1.408	0.784	0.699	1.093	0.763	1.389	1.337	0.899	1.94	1.072	0.678	1.178	1.47	1.095	1.173	0.621	1.846	1.233	1.155	1.041	0.761	1.32
F8W809	1.257	1.061	2.09	1.6	0.613	0.481	0.572	0.89	1.842	1.993	1.206	2.07	1.492	0.685	0.415	0.913	1.79	2.349	1.597	1.195	0.816	1.833	1.262	1.562	0.717	1.324	1.491	1.335	0.755	0.676	1.051	0.731	1.352	1.288	0.843	1.946	1.026	0.681	1.136	1.361	1.063	1.164	0.686	1.719	1.195	1.201	1.101	0.821	1.282
P08575	1.443	1.24	2.356	1.814	0.758	0.573	0.607	1.145	2.19	2.6	1.412	2.305	1.616	0.868	0.562	1.224	2.116	2.634	1.642	1.285	0.988	2.101	1.483	1.838	0.82	1.621	1.773	1.598	0.897	0.798	1.293	0.931	1.708	1.604	1.113	2.463	1.238	0.854	1.395	1.735	1.345	1.457	0.8	2.091	1.552	1.329	1.168	0.905	1.501
P46977	1.318	1.057	2.12	1.694	0.645	0.474	0.541	0.992	1.864	2.236	1.243	2.267	1.57	0.717	0.43	1.063	2.03	2.419	1.515	1.158	0.812	1.891	1.298	1.545	0.727	1.353	1.495	1.37	0.729	0.675	1.072	0.765	1.289	1.251	0.86	1.928	1.094	0.646	1.162	1.441	1.126	1.152	0.691	1.717	1.207	1.186	1.031	0.773	1.321
P12236	1.338	1.087	2.074	1.655	0.645	0.488	0.551	0.915	1.853	2.099	1.212	2.021	1.447	0.662	0.464	0.931	1.768	2.28	1.672	1.215	0.805	1.924	1.258	1.555	0.712	1.226	1.535	1.378	0.742	0.68	1.073	0.725	1.289	1.239	0.814	1.916	1.078	0.679	1.137	1.408	1.024	1.061	0.654	1.625	1.201	1.174	1.034	0.768	1.293
Q9BT78	1.418	1.252	2.261	1.724	0.744	0.609	0.607	1.107	2.047	2.076	1.303	2.302	1.681	0.721	0.441	1.136	2.118	2.468	1.444	1.223	0.829	1.808	1.316	1.572	0.778	1.389	1.446	1.415	0.821	0.712	1.112	0.874	1.451	1.449	0.947	2.119	1.141	0.766	1.238	1.558	1.236	1.22	0.736	1.757	1.359	1.158	1.094	0.806	1.42
Q5T0I0	1.238	1.131	2.199	1.684	0.587	0.431	0.455	0.913	1.972	2.032	1.407	2.759	1.818	0.711	0.419	1.094	1.847	2.619	1.486	1.075	0.701	1.668	1.191	1.371	0.505	0.871	1.372	1.288	0.757	0.656	1.128	0.709	1.282	1.18	0.766	2.019	0.965	0.632	1.058	1.312	0.943	0.999	0.581	1.49	1.098	1.077	0.941	0.689	1.13
Q9UGP8	1.272	1.083	2.122	1.668	0.676	0.49	0.538	0.929	1.935	2.097	1.221	2.2	1.538	0.72	0.441	0.972	1.891	2.449	1.431	1.159	0.793	1.872	1.25	1.596	0.737	1.305	1.583	1.283	0.727	0.663	1.063	0.742	1.304	1.265	0.855	1.969	1.064	0.648	1.147	1.472	1.059	1.074	0.664	1.658	1.232	1.121	1.003	0.75	1.252
Q9HB71	1.317	1.121	2.246	1.853	0.675	0.472	0.535	1.035	1.996	2.233	1.264	2.28	1.528	0.702	0.423	1.005	2.018	2.352	1.527	1.138	0.803	1.912	1.253	1.53	0.648	1.237	1.533	1.387	0.744	0.678	1.079	0.733	1.263	1.201	0.791	1.933	1.073	0.658	1.159	1.446	1.093	1.097	0.639	1.71	1.222	1.163	0.998	0.752	1.301
Q9NSD9	1.32	1.093	2.167	1.625	0.641	0.479	0.509	0.886	1.892	1.92	1.256	2.23	1.495	0.637	0.426	0.988	1.894	2.419	1.38	1.191	0.805	1.803	1.263	1.523	0.768	1.356	1.437	1.344	0.719	0.624	1.009	0.735	1.242	1.205	0.813	1.892	1.026	0.659	1.104	1.358	1.058	1.106	0.628	1.631	1.174	1.124	1.013	0.746	1.264
O00232	1.346	1.1	2.225	1.741	0.657	0.496	0.54	1.02	2.048	1.982	1.294	2.233	1.524	0.655	0.452	1.114	1.976	2.402	1.491	1.155	0.77	1.88	1.299	1.57	0.731	1.262	1.548	1.366	0.703	0.647	1.095	0.737	1.267	1.21	0.819	1.982	1.032	0.647	1.109	1.45	1.061	1.042	0.642	1.533	1.243	1.134	1.002	0.74	1.233
A0A2R8Y5V9	1.419	1.307	2.516	2.05	0.83	0.64	0.708	1.231	2.281	2.48	1.421	2.375	1.64	0.763	0.523	1.156	2.043	2.556	1.644	1.32	0.956	1.793	1.35	1.599	0.716	1.267	1.198	1.533	0.763	0.802	1.189	0.906	1.416	1.353	0.781	2.219	1.155	0.731	1.202	1.426	1.196	1.211	0.653	1.808	1.249	1.053	0.979	0.629	1.274
O60749	1.309	1.106	2.108	1.614	0.641	0.49	0.567	0.941	1.853	2.163	1.327	2.312	1.577	0.752	0.467	0.986	1.921	2.466	1.583	1.241	0.824	1.86	1.299	1.559	0.734	1.265	1.515	1.374	0.768	0.722	1.105	0.776	1.309	1.289	0.89	2.039	1.097	0.681	1.208	1.484	1.132	1.197	0.685	1.817	1.282	1.132	1.043	0.773	1.225
Q93009	1.289	1.147	2.08	1.686	0.671	0.525	0.502	0.969	1.941	1.824	1.195	2.047	1.515	0.622	0.441	0.896	1.786	2.433	1.39	1.21	0.817	1.915	1.282	1.603	0.832	1.376	1.482	1.291	0.693	0.645	1.019	0.703	1.24	1.166	0.833	1.882	1.074	0.626	1.071	1.304	1.012	1.055	0.683	1.468	1.156	1.084	0.96	0.714	1.192
P20591	2.013	1.724	3.418	2.614	1.073	0.816	0.844	1.432	3.086	3.126	1.868	3.101	2.372	1.136	0.671	1.401	2.603	3.552	2.08	1.703	1.257	2.66	1.918	2.278	1.216	1.928	2.322	1.884	1.133	0.94	1.509	1.146	1.87	1.86	1.149	2.817	1.7	1.076	1.839	2.166	1.811	1.867	1.047	2.867	2.047	1.652	1.498	1.038	1.839
P49589	1.229	1.071	2.22	1.702	0.662	0.536	0.599	0.919	2.023	2.355	1.264	2.226	1.595	0.792	0.512	1.064	1.957	2.541	1.507	1.128	0.731	1.662	1.13	1.431	0.692	1.225	1.339	1.244	0.716	0.645	1.028	0.741	1.285	1.227	0.809	1.921	0.981	0.641	1.109	1.306	1.049	1.057	0.655	1.527	1.152	1.12	1.046	0.734	1.244
F8W726	1.303	0.983	1.595	1.261	0.666	0.545	0.68	0.829	1.528	2.657	1.211	1.796	1.242	0.888	0.537	0.973	1.725	2.061	1.703	1.221	0.861	1.964	1.35	1.579	0.769	1.416	1.367	1.49	0.791	0.715	1.143	0.863	1.474	1.51	1.011	2.057	1.154	0.744	1.197	1.476	1.087	1.236	0.687	1.878	1.24	1.244	1.146	0.853	1.501
P61586	1.293	1.119	2.264	1.777	0.678	0.488	0.571	0.936	1.946	2.263	1.304	2.27	1.498	0.741	0.457	1.038	2.049	2.321	1.769	1.204	0.791	1.932	1.21	1.553	0.644	1.203	1.523	1.422	0.781	0.685	1.126	0.73	1.398	1.279	0.849	2.051	1.044	0.637	1.153	1.39	1.009	1.118	0.592	1.66	1.224	1.182	1.044	0.78	1.319
P60900	1.258	1.095	2.166	1.708	0.668	0.48	0.514	0.941	1.88	2.052	1.211	2.016	1.442	0.691	0.417	0.971	1.757	2.129	1.429	1.157	0.822	1.882	1.277	1.559	0.735	1.356	1.525	1.263	0.738	0.653	1	0.744	1.323	1.204	0.823	1.751	1.009	0.703	1.087	1.356	1.031	1.071	0.646	1.531	1.176	1.109	1	0.77	1.216
Q9ULV4	1.292	1.086	1.896	1.564	0.677	0.495	0.513	0.916	1.834	2.331	1.233	2.117	1.528	0.758	0.472	0.957	1.803	2.466	1.594	1.203	0.833	1.943	1.219	1.505	0.73	1.3	1.476	1.49	0.775	0.695	1.106	0.804	1.343	1.365	0.897	2.036	1.065	0.642	1.186	1.336	1.045	1.2	0.659	1.794	1.166	1.113	1.019	0.764	1.254
Q99733	1.325	1.138	2.242	1.764	0.686	0.541	0.565	1.045	2.041	2.133	1.344	2.272	1.654	0.776	0.461	1.171	2.058	2.534	1.5	1.198	0.847	1.881	1.292	1.604	0.752	1.373	1.582	1.375	0.784	0.696	1.102	0.82	1.473	1.396	0.914	2.102	1.067	0.678	1.179	1.461	1.159	1.194	0.684	1.771	1.288	1.182	1.055	0.784	1.293
P62879	1.254	1.069	2.088	1.725	0.625	0.439	0.514	0.886	1.788	2.012	0.98	1.5	1.081	0.602	0.397	0.904	1.397	1.672	1.685	1.215	0.819	1.734	1.157	1.432	0.658	1.199	1.203	1.31	0.617	0.62	0.919	0.632	1.211	1.154	0.734	1.769	1.071	0.735	1.164	1.373	1.077	1.104	0.626	1.818	1.084	1.007	1.051	0.766	1.205
P20042	1.261	1.072	2.006	1.627	0.694	0.515	0.536	0.94	1.922	2.033	1.28	2.179	1.537	0.719	0.424	1	1.943	2.449	1.557	1.142	0.805	1.874	1.261	1.496	0.657	1.287	1.531	1.29	0.723	0.657	1.041	0.746	1.271	1.22	0.812	1.92	1.002	0.635	1.19	1.413	1.04	1.148	0.609	1.701	1.19	1.135	1.017	0.736	1.305
Q96HE7	1.629	1.465	2.817	2.276	0.892	0.631	0.651	1.257	2.466	2.134	1.432	2.513	1.715	0.766	0.462	1.116	2.365	2.599	1.594	1.33	0.915	2.022	1.427	1.681	0.883	1.533	1.584	1.612	0.874	0.738	1.267	0.884	1.514	1.484	1.032	2.309	1.153	0.711	1.283	1.648	1.241	1.252	0.698	1.862	1.351	1.324	1.222	0.851	1.508
P61106	1.34	1.175	2.212	1.715	0.698	0.544	0.569	1.043	2.014	2.116	1.208	2.049	1.513	0.707	0.439	0.984	1.812	2.281	1.482	1.178	0.827	1.842	1.261	1.587	0.752	1.362	1.524	1.387	0.76	0.669	1.073	0.783	1.36	1.31	0.875	1.951	1.081	0.712	1.162	1.419	1.087	1.15	0.655	1.735	1.246	1.19	1.073	0.77	1.334
P42167	1.404	1.238	2.223	1.783	0.817	0.606	0.64	1.08	2.111	2.89	1.224	1.99	1.486	0.915	0.528	1.033	1.69	2.161	1.698	1.14	0.86	1.94	1.282	1.596	0.711	1.411	1.513	1.408	0.818	0.729	1.134	0.886	1.544	1.458	1.031	2.072	1.194	0.737	1.267	1.625	1.22	1.282	0.712	2.085	1.344	1.208	1.085	0.824	1.367
Q14315										1.91	0.932	1.479	1.034	0.51	0.449	0.593	1.2	1.64	1.286	1.28	0.838	1.962	1.316	1.807	0.849	1.538	1.917	1.489	0.819	0.7	1.054	0.714	1.388	1.364	0.934	2.15										1.05	1.174	0.692	1.146
Q5SX86	1.646	1.233	2.857	2.082	0.903	0.364	0.116	1.203	1.88
Q9NU22	1.272	1.152	2.124	1.623	0.777	0.554	0.586	1.002	1.859	2.315	1.303	2.243	1.522	0.839	0.506	1.046	1.869	2.495	1.373	1.075	0.833	2.043	1.319	1.661	0.721	1.413	1.605	1.285	0.745	0.688	1.048	0.993	1.293	1.339	0.879	1.895	0.981	0.49	1.057	1.148	0.999	0.916	0.497	1.298	1.091	1.181	0.809	0.632	1.054
P13861	1.276	1.153	2.078	1.6	0.714	0.588	0.589	0.987	1.996	2.094	1.175	1.878	1.335	0.717	0.451	0.97	1.679	2.114	1.499	1.175	0.85	1.889	1.29	1.635	0.734	1.377	1.65	1.316	0.748	0.684	1.053	0.75	1.391	1.31	0.901	1.993	1.023	0.691	1.166	1.393	1.083	1.147	0.678	1.712	1.218	1.14	1.012	0.78	1.298
Q07954	1.298	1.111	2.021	1.464	0.827	0.588	0.688	1.012	1.871	1.906	1.093	1.79	1.31	0.59	0.336	0.87	1.896	2.107	1.591	1.269	0.887	2.069	1.439	1.848	0.858	1.605	1.576	1.28	0.778	0.713	1.055	0.755	1.439	1.354	0.955	2.058	1.062	0.709	1.172	1.359	1.205	1.197	0.73	1.812	1.28	1.21	1.111	0.808	1.338
Q9Y3I0	1.255	1.06	2.005	1.56	0.592	0.461	0.503	0.914	1.746	2.103	1.165	2.032	1.513	0.735	0.428	0.996	1.697	2.22	1.371	1.119	0.741	1.69	1.227	1.48	0.709	1.23	1.409	1.307	0.735	0.624	1.022	0.766	1.324	1.236	0.826	1.99	1.003	0.666	1.139	1.409	1.046	1.108	0.637	1.646	1.207	1.128	1.039	0.743	1.281
A0A0C4DG89																																					0.795	0.675	1.206	1.189	1.056	1.164	0.683	1.754	1.146
P11172	1.362	1.155	2.233	1.793	0.687	0.483	0.515	0.967	1.933	2.024	1.312	2.254	1.54	0.72	0.482	0.893	1.78	2.414	1.493	1.239	0.838	1.847	1.321	1.535	0.76	1.344	1.466	1.371	0.752	0.72	1.085	0.765	1.297	1.25	0.907	2.105	1.057	0.699	1.142	1.354	1.022	1.124	0.671	1.655	1.301	1.154	1.023	0.754	1.236
P42858	1.337	1.143	1.994	1.66	0.707	0.537	0.518	1.116	2.096	1.807	1.249	2.053	1.439	0.611	0.466	1.048	1.886	2.372	0.936	1.142	0.796	1.733	1.335	1.558	0.964	1.518	1.587	1.338	0.736	0.777	1.066	0.77	1.485	1.341	0.945	1.968	1.125	0.723	1.221	1.441	1.165	1.208	0.806	1.695	1.394	1.198	1.104	0.846	1.393
P55263	1.332	1.1	2.138	1.678	0.683	0.494	0.571	0.931	1.89	2.431	1.333	2.308	1.588	0.821	0.49	0.903	1.873	2.468	1.641	1.198	0.799	1.844	1.301	1.483	0.737	1.275	1.425	1.419	0.774	0.65	1.068	0.763	1.325	1.229	0.859	1.997	1.08	0.693	1.2	1.413	1.094	1.149	0.653	1.806	1.185	1.177	1.048	0.771	1.291
O00764	1.296	1.102	1.97	1.485	0.623	0.51	0.57	0.945	1.8	2.116	1.123	1.838	1.268	0.698	0.414	0.884	1.603	2.029	1.503	1.133	0.784	1.806	1.217	1.506	0.717	1.247	1.479	1.34	0.803	0.693	1.077	0.795	1.389	1.398	0.902	2.063	1.017	0.689	1.178	1.393	1.124	1.211	0.722	1.842	1.216	1.069	0.982	0.749	1.232
Q8WVM8	1.232	1.068	2.035	1.56	0.625	0.447	0.491	0.899	1.755	1.824	1.253	2.199	1.548	0.702	0.454	0.942	1.827	2.489	1.31	1.178	0.816	1.804	1.321	1.554	0.785	1.391	1.454	1.279	0.715	0.64	1.049	0.765	1.271	1.242	0.865	1.967	1.061	0.681	1.112	1.41	1.046	1.066	0.619	1.583	1.237	1.224	1.114	0.808	1.367
Q9UKW4	1.344	1.146	2.189	1.681	0.697	0.528	0.552	0.978	2.005	2.089	1.255	2.276	1.599	0.71	0.444	1.01	2.087	2.57	1.581	1.123	0.816	1.965	1.264	1.57	0.695	1.303	1.503	1.356	0.783	0.684	1.095	0.816	1.412	1.438	0.996	1.993	1.011	0.652	1.143	1.431	1.122	1.224	0.699	1.866	1.179	1.173	1.016	0.793	1.211
P67936	1.265	0.934	1.712	1.279	0.553	0.441	0.497	1.025	1.532	2.385	1.223	1.945	1.413	0.73	0.449	0.96	1.906	2.149	1.64	1.167	0.831	1.887	1.195	1.575	0.621	1.298	1.526	1.363	0.733	0.619	1.047	0.756	1.322	1.262	0.845	1.907	1.174	0.764	1.309	1.698	1.244	1.411	0.684	2.225	1.439	1.192	1.074	0.762	1.37
Q8N392	1.404	1.239	2.272	1.785	0.682	0.565	0.588	1.089	2.125	2.325	1.31	2.238	1.642	0.814	0.498	1.134	2.032	2.64	1.341	1.216	0.86	1.968	1.323	1.68	0.817	1.438	1.704	1.403	0.794	0.731	1.146	0.837	1.499	1.451	0.987	2.167	1.037	0.684	1.224	1.457	1.066	1.207	0.642	1.86	1.243	1.135	1.093	0.804	1.299
P08865	1.206	1.048	1.921	1.491	0.608	0.486	0.556	0.962	1.735	2.136	1.206	2.009	1.438	0.753	0.45	0.945	1.76	2.181	1.485	1.193	0.823	1.743	1.23	1.485	0.731	1.304	1.448	1.359	0.762	0.66	1.062	0.728	1.321	1.241	0.828	1.978	1.008	0.657	1.124	1.366	1.04	1.06	0.616	1.614	1.118	1.128	1.034	0.739	1.27
O95782	1.247	1.09	2.029	1.505	0.659	0.465	0.489	0.864	1.671	1.75	1.47	2.51	1.782	0.668	0.45	1.049	2.212	2.872	1.251	1.191	0.881	1.835	1.355	1.623	0.899	1.422	1.59	1.282	0.748	0.629	1.047	0.72	1.253	1.181	0.807	1.836	1.092	0.7	1.247	1.585	1.245	1.288	0.745	1.682	1.374	1.148	1.064	0.766	1.221
Q99497	1.302	1.06	2.214	1.679	0.655	0.517	0.566	1.002	1.927	2.332	1.308	2.16	1.413	0.72	0.501	0.928	1.98	2.185	1.74	1.149	0.809	1.819	1.147	1.521	0.68	1.298	1.367	1.377	0.745	0.704	1.065	0.729	1.368	1.298	0.886	1.873	1.136	0.686	1.195	1.453	1.139	1.251	0.736	1.889	1.231	1.152	1.008	0.819	1.32
K7ER00	1.297	1.139	2.066	1.64	0.652	0.533	0.509	0.973	1.944	2.004	1.055	1.769	1.262	0.646	0.407	1.017	1.686	2.021	1.461	1.087	0.823	1.782	1.134	1.451	0.656	1.258	1.397	1.29	0.788	0.657	1.139	0.79	1.396	1.359	0.918	2.043	1.025	0.635	1.189	1.426	1.077	1.215	0.651	1.854	1.17	1.131	1.009	0.767	1.283
G8JLA2	1.077	0.855	1.431	1.176	0.746	0.672	0.848	0.973	1.555	2.569	1.288	1.39	1.102	0.998	0.522	1.019	1.394	2.169	2.125	1.526	1.081	2.362	1.584	2.363	0.604	1.462	1.749										1.195	0.68	1.762	2.335	1.315	1.344	0.741	2.338	1.447	1.237	1.106	0.821	1.352
H0YA96	1.766	1.344	2.42	1.936	0.659	0.526	0.439	1.32	1.999	1.855	1.381	2.21	1.39	0.543	0.303	1.265	2.426	2.38	1.127	1.57	0.912	2.437	1.632	2.182	1.041	2.087	2.252	1.769	1.068	0.772	1.179	1.233	2.032	1.785	1.033	2.41	1.739	1.18	1.615	1.965	1.782	1.823	1.089	2.234	1.676	1.657	1.439	0.936	1.645
P08754	1.238	1.029	1.765	1.412	0.644	0.487	0.546	0.931	1.576	2.396	1.133	1.875	1.443	0.825	0.465	1.02	1.594	2.023	1.572	1.14	0.802	1.79	1.241	1.443	0.683	1.322	1.411	1.284	0.758	0.652	0.949	0.738	1.29	1.263	0.891	1.855	1.097	0.718	1.21	1.516	1.119	1.166	0.68	1.829	1.239	1.183	1.09	0.8	1.341
Q27J81	1.369	1.231	2.314	1.878	0.729	0.543	0.58	1.128	2.208	2.419	1.202	2.028	1.495	0.805	0.524	1.129	1.857	2.392	1.66	1.318	0.881	1.934	1.478	1.667	0.884	1.44	1.656	1.339	0.78	0.719	1.056	0.75	1.357	1.331	0.89	1.971	1.094	0.695	1.176	1.511	1.199	1.225	0.682	1.744	1.325	1.264	1.074	0.836	1.399
Q14847	1.271	1.013	1.868	1.416	0.611	0.467	0.534	0.886	1.624	2.219	1.176	1.864	1.377	0.734	0.433	0.993	1.629	1.961	1.466	1.081	0.781	1.724	1.157	1.493	0.649	1.244	1.46	1.245	0.687	0.61	0.932	0.712	1.257	1.216	0.792	1.663	1.043	0.694	1.08	1.406	1.039	1.101	0.607	1.7	1.172	1.098	1	0.761	1.195
Q96RP9	1.433	1.129	2.148	1.698	0.721	0.597	0.638	1.11	1.992	2.256	1.418	2.461	1.809	0.817	0.548	1.113	2.164	2.849	1.543	1.292	0.928	2.088	1.371	1.761	0.914	1.532	1.793	1.468	0.843	0.729	1.119	0.833	1.475	1.406	0.974	2.195	1.123	0.746	1.247	1.436	1.148	1.282	0.772	1.824	1.335	1.118	1.026	0.788	1.285
Q9H0D6	1.258	1.102	2.137	1.771	0.687	0.508	0.496	0.992	2.073	2.252	1.259	2.11	1.496	0.829	0.486	1.055	1.79	2.44	1.334	1.128	0.813	1.772	1.262	1.606	0.766	1.372	1.523	1.36	0.833	0.726	1.117	0.817	1.527	1.437	0.994	2.138	1.011	0.687	1.171	1.41	1.056	1.134	0.645	1.725	1.296	1.145	1.019	0.771	1.336
Q15019	1.279	1.155	2.293	1.814	0.686	0.546	0.614	0.98	2.09	2.028	1.233	2.19	1.553	0.731	0.471	1.039	2.032	2.457	1.472	1.119	0.775	1.696	1.175	1.501	0.718	1.222	1.429	1.348	0.806	0.68	1.055	0.745	1.344	1.297	0.866	2.044	0.993	0.663	1.122	1.353	1.033	1.119	0.642	1.684	1.123	1.055	0.985	0.719	1.218
P29692	1.223	1.101	2.081	1.654	0.683	0.495	0.568	0.917	1.894	1.984	1.25	2.141	1.483	0.692	0.408	1.017	1.872	2.399	1.397	1.068	0.752	1.774	1.17	1.489	0.69	1.258	1.405	1.319	0.748	0.624	1.091	0.741	1.332	1.304	0.866	2.019	1.001	0.625	1.138	1.42	1.078	1.152	0.664	1.814	1.262	1.082	1.003	0.724	1.256
P42166	1.174	1.211	1.881	1.33	0.493	0.44	0.482	0.916	1.922	2.206	1.506	2.829	1.849	0.954	0.512	0.911	2.265	3.019	1.108	1.136	0.872	1.825	1.476	1.85	0.823	1.612	1.536	1.383	0.706	0.566	1.078	0.868	1.163	1.36	1.018	1.85	1.127	0.726	1.288	1.558	1.353	1.371	0.939	1.874	1.212
O14950	1.427	1.212	2.297	1.779	0.596	0.498	0.598	1.224	2.057	2.365	1.322	2.293	1.783	0.828	0.492	1.278	2.309	2.503	1.562	1.334	0.825	1.918	1.483	1.752	0.763	1.44	1.739	1.503	0.833	0.666	1.146	0.87	1.524	1.435	0.934	2.119	1.103	0.7	1.191	1.538	1.168	1.106	0.59	1.696	1.317	1.134	1.063	0.705	1.311
P09211	1.28	1.095	2.154	1.731	0.638	0.462	0.517	0.907	1.886	2.22	1.327	2.352	1.597	0.706	0.437	0.983	1.844	2.516	1.471	1.177	0.799	1.803	1.24	1.474	0.674	1.227	1.423	1.343	0.738	0.654	1.045	0.701	1.233	1.19	0.79	1.907	1.044	0.694	1.165	1.416	1.05	1.071	0.665	1.616	1.187	1.144	1.077	0.805	1.296
Q9Y5M8	1.231	1.078	1.948	1.506	0.645	0.48	0.53	0.893	1.739	1.789	1.139	2.051	1.525	0.646	0.404	0.989	1.751	2.261	1.394	1.152	0.773	1.675	1.255	1.478	0.742	1.233	1.392	1.258	0.719	0.614	0.992	0.736	1.225	1.198	0.798	1.84	1.024	0.664	1.099	1.338	1.024	1.032	0.556	1.561	1.172	1.079	1.012	0.67	1.206
P10768	1.257	1.058	1.954	1.484	0.652	0.502	0.547	0.883	1.766	2.097	1.184	1.949	1.469	0.739	0.477	0.904	1.704	2.193	1.664	1.184	0.81	1.799	1.183	1.525	0.68	1.195	1.405	1.47	0.738	0.672	1.102	0.693	1.213	1.151	0.783	1.999	1.08	0.664	1.164	1.377	1.02	1.1	0.683	1.637	1.231	1.112	1	0.713	1.185
Q13867	1.308	1.143	2.244	1.782	0.679	0.462	0.501	0.936	1.937	2.099	1.363	2.362	1.717	0.745	0.453	1.062	2.092	2.622	1.36	1.181	0.78	1.813	1.279	1.526	0.737	1.297	1.554	1.401	0.792	0.696	1.131	0.81	1.447	1.336	0.901	2.134	1.034	0.634	1.135	1.386	1.084	1.124	0.655	1.672	1.212	1.178	1.025	0.771	1.308
A0A3F2YNW8	1.298	1.047	2.13	1.629	0.687	0.523	0.55	0.938	1.971	2.341	1.223	2.007	1.436	0.772	0.443	0.981	1.732	2.257	1.484	1.108	0.842	1.922	1.301	1.583	0.72	1.356	1.52	1.26	0.73	0.655	1.004	0.725	1.34	1.301	0.909	1.835	1.038	0.657	1.185	1.436	1.098	1.157	0.696	1.743	1.208	1.179	1.009	0.815	1.286
P49257	1.244	1.034	1.912	1.549	0.644	0.493	0.552	0.973	1.8	2.111	1.133	1.874	1.31	0.725	0.415	1.026	1.75	2.104	1.694	1.144	0.833	1.923	1.22	1.534	0.659	1.32	1.552	1.309	0.749	0.634	1.036	0.743	1.331	1.275	0.849	1.929	1.076	0.674	1.203	1.45	1.119	1.217	0.651	1.903	1.222	1.145	1.006	0.788	1.3
O60264	1.263	1.065	2.101	1.571	0.636	0.474	0.471	0.923	1.934	1.971	1.197	1.874	1.326	0.665	0.453	0.92	1.677	2.108	1.416	1.166	0.829	1.854	1.242	1.494	0.796	1.386	1.5	1.268	0.735	0.637	1.003	0.746	1.213	1.132	0.788	1.89	1.138	0.707	1.219	1.48	1.181	1.235	0.756	1.713	1.247	1.153	1.114	0.779	1.341
Q5T4U5	1.277	1.065	2.069	1.64	0.628	0.473	0.51	0.971	1.897	2.187	1.304	2.192	1.444	0.716	0.444	0.995	1.975	2.335	1.643	1.18	0.817	1.825	1.208	1.463	0.69	1.198	1.447	1.39	0.756	0.706	1.054	0.759	1.404	1.307	0.887	1.962	1.034	0.663	1.146	1.396	1.034	1.13	0.634	1.715	1.186	1.167	1.019	0.784	1.288
P30419	1.349	1.089	2.367	1.847	0.652	0.5	0.538	1.019	2.16	2.214	1.188	1.979	1.381	0.728	0.417	0.978	1.734	2.192	1.537	1.225	0.853	1.982	1.352	1.68	0.856	1.448	1.821	1.384	0.792	0.683	1.123	0.796	1.405	1.38	0.904	2.074	1.051	0.659	1.16	1.449	1.04	1.132	0.652	1.765	1.197	1.161	1.032	0.789	1.344
P62424	1.358	1.153	2.298	1.727	0.721	0.567	0.628	0.957	2.046	2.49	1.277	2.104	1.482	0.777	0.489	0.89	1.813	2.29	1.697	1.245	0.883	2.01	1.273	1.681	0.746	1.4	1.598	1.412	0.827	0.726	1.123	0.781	1.448	1.379	0.919	2.136	1.046	0.66	1.163	1.362	1.024	1.162	0.643	1.779	1.128	1.134	1.017	0.766	1.296
P83111	1.222	1.057	1.791	1.389	0.6	0.485	0.54	0.935	1.779	2.189	1.226	1.787	1.201	0.645	0.437	0.854	1.842	2.116	1.216	1.096	0.677	1.482	1.051	1.376	0.645	1.211	1.293	1.27	0.749	0.581	0.89	0.71	1.25	1.187	0.829	1.936	1.165	0.737	1.259	1.496	1.226	1.23	0.742	1.643	1.258	1.261	1.154	0.853	1.37
Q7L014	1.336	1.127	2.292	1.777	0.698	0.538	0.584	0.934	2.026	2.03	1.205	2.277	1.539	0.685	0.445	0.959	1.851	2.379	1.424	1.167	0.829	1.785	1.23	1.52	0.739	1.279	1.513	1.282	0.722	0.693	1.04	0.767	1.3	1.254	0.842	1.987	1.015	0.653	1.109	1.328	0.99	1.058	0.641	1.699	1.138	1.096	0.993	0.73	1.239
Q9BZZ5	1.292	1.125	2.002	1.538	0.658	0.536	0.645	1.003	1.957	2.187	1.16	2.011	1.546	0.776	0.486	0.963	1.824	2.21	1.438	1.199	0.761	1.731	1.284	1.546	0.712	1.274	1.454	1.327	0.744	0.67	1.057	0.785	1.325	1.363	0.884	2.022	1.048	0.677	1.14	1.358	1.047	1.125	0.593	1.704	1.185	1.214	1.13	0.724	1.375
P18124	1.311	1.097	2.217	1.7	0.661	0.48	0.563	0.853	1.924	2.293	1.303	2.247	1.51	0.721	0.433	0.881	1.782	2.368	1.545	1.202	0.806	1.837	1.192	1.507	0.661	1.256	1.352	1.434	0.775	0.711	1.087	0.734	1.311	1.254	0.832	2.067	1.072	0.658	1.155	1.387	0.994	1.076	0.616	1.628	1.137	1.123	1.045	0.742	1.229
P23786	1.367	1.17	2.282	1.745	0.697	0.57	0.633	0.979	2.094	2.343	1.228	2.078	1.525	0.788	0.492	1.092	2.081	2.429	1.603	1.203	0.877	1.868	1.312	1.652	0.747	1.275	1.572	1.333	0.726	0.677	1.098	0.788	1.339	1.268	0.85	2.02	1.076	0.714	1.2	1.474	1.139	1.177	0.67	1.741	1.237	1.18	1.087	0.796	1.387
Q9UNF0	1.318	1.113	2.075	1.625	0.687	0.533	0.606	0.966	1.883	2.372	1.325	2.197	1.635	0.821	0.495	1.097	1.928	2.481	1.607	1.201	0.834	1.892	1.304	1.606	0.726	1.341	1.581	1.37	0.764	0.657	1.073	0.782	1.326	1.284	0.84	1.987	0.955	0.594	1.061	1.288	0.978	1.035	0.572	1.637	1.101	1.165	1.047	0.753	1.261
P08567	1.334	1.063	2.116	1.716	0.662	0.465	0.56	0.877	1.9	2.31	1.275	2.192	1.5	0.713	0.458	0.991	1.871	2.344	1.605	1.231	0.804	1.934	1.263	1.541	0.735	1.253	1.512	1.395	0.757	0.688	1.086	0.746	1.245	1.208	0.829	1.915	1.103	0.686	1.188	1.465	1.104	1.067	0.623	1.652	1.207	1.22	1.109	0.848	1.372
P31153	1.337	1.102	2.055	1.601	0.646	0.49	0.53	0.939	1.833	2.152	1.21	2.031	1.427	0.714	0.444	0.883	1.72	2.226	1.435	1.174	0.823	1.888	1.259	1.587	0.749	1.383	1.519	1.35	0.743	0.648	1.048	0.737	1.309	1.241	0.852	1.971	1.043	0.677	1.17	1.396	1.064	1.129	0.634	1.729	1.208	1.171	1.039	0.779	1.288
Q92922	1.285	1.079	2.095	1.659	0.675	0.567	0.597	1.004	2.036	2.197	1.164	1.999	1.486	0.715	0.452	0.932	1.636	2.292	1.601	1.166	0.833	1.811	1.252	1.557	0.67	1.277	1.506	1.381	0.724	0.666	1.099	0.763	1.293	1.307	0.797	2.092	1.069	0.634	1.13	1.379	1.102	1.117	0.642	1.754	1.201	1.198	1.072	0.812	1.318
P46060	1.228	1.071	1.967	1.527	0.699	0.534	0.548	0.895	1.811	1.68	1.158	2.066	1.492	0.61	0.444	0.907	1.748	2.357	1.29	1.262	0.784	1.724	1.22	1.568	0.857	1.36	1.574	1.255	0.72	0.656	0.952	0.781	1.402	1.351	0.926	1.936	1.057	0.726	1.185	1.472	1.148	1.215	0.699	1.756	1.348	1.015	0.992	0.756	1.258
Q8TAQ2	1.35	1.179	2.151	1.644	0.687	0.567	0.604	1.014	2.074	2.166	1.211	2.121	1.576	0.775	0.512	1.025	1.859	2.392	1.468	1.219	0.855	1.962	1.291	1.635	0.81	1.47	1.62	1.359	0.802	0.739	1.092	0.848	1.538	1.451	1.011	2.087	1.047	0.652	1.217	1.469	1.139	1.303	0.764	1.817	1.31	1.21	1.077	0.798	1.413
O94776	1.315	1.101	2.095	1.631	0.694	0.541	0.552	1.019	1.961	2.132	1.197	1.978	1.399	0.729	0.446	0.996	1.746	2.301	1.528	1.145	0.86	1.879	1.229	1.566	0.721	1.349	1.517	1.382	0.785	0.694	1.043	0.83	1.402	1.359	0.93	2.048	1.073	0.693	1.169	1.423	1.099	1.188	0.675	1.836	1.208	1.155	1.057	0.78	1.302
P62906	1.327	1.13	2.17	1.692	0.657	0.51	0.532	0.979	1.887	2.17	1.206	2.063	1.5	0.756	0.448	1.038	1.793	2.335	1.52	1.244	0.851	1.926	1.288	1.614	0.769	1.418	1.487	1.391	0.792	0.713	1.084	0.8	1.423	1.357	0.885	2.152	1.054	0.69	1.262	1.472	1.146	1.182	0.687	1.795	1.224	1.154	1.046	0.776	1.307
B3KS98	1.272	1.043	2.008	1.583	0.65	0.508	0.582	0.941	1.873	2.16	1.078	1.754	1.237	0.667	0.404	0.867	1.589	1.989	1.55	1.18	0.838	1.886	1.268	1.666	0.754	1.407	1.743	1.332	0.725	0.682	1.03	0.748	1.4	1.317	0.888	2.071	1.124	0.745	1.266	1.461	1.138	1.326	0.737	1.893	1.445	1.225	1.097	0.911	1.296
P12004	1.272	1.087	2.09	1.657	0.638	0.479	0.539	0.992	1.902	2.03	1.143	2.025	1.416	0.706	0.425	0.994	1.742	2.146	1.578	1.206	0.782	1.816	1.285	1.513	0.692	1.273	1.468	1.373	0.776	0.663	1.072	0.767	1.283	1.248	0.799	1.968	1.072	0.67	1.174	1.452	1.067	1.068	0.621	1.634	1.234	1.153	1.056	0.797	1.346
Q14764	1.265	1.087	2.248	1.665	0.672	0.526	0.569	0.968	1.998	2.117	1.301	2.235	1.59	0.756	0.444	0.997	1.888	2.499	1.533	1.218	0.813	1.732	1.25	1.602	0.742	1.347	1.588	1.297	0.739	0.65	0.993	0.742	1.332	1.299	0.881	1.952	1.074	0.689	1.112	1.334	1.047	1.094	0.67	1.614	1.139	1.089	0.981	0.738	1.188
O60361	1.091	0.975	1.769	1.316	0.564	0.381	0.453	1.004	1.436
A0A286YFF7	1.258	1.121	2.201	1.663	0.695	0.513	0.61	1.075	2.007	2.216	1.222	2.129	1.574	0.733	0.464	1.085	1.983	2.247	1.488	1.158	0.756	1.812	1.203	1.626	0.669	1.275	1.557	1.407	0.754	0.634	1.12	0.812	1.565	1.471	0.97	2.215	1.031	0.621	1.07	1.442	1.028	1.068	0.54	1.654	1.196	1.103	0.995	0.678	1.284
P20618	1.349	1.191	2.283	1.819	0.731	0.571	0.566	1.062	2.108	2.055	1.27	2.213	1.59	0.72	0.459	1.084	1.996	2.486	1.426	1.186	0.819	1.847	1.235	1.586	0.759	1.412	1.486	1.365	0.77	0.682	1.07	0.777	1.404	1.328	0.874	1.996	1.063	0.7	1.21	1.446	1.154	1.185	0.698	1.801	1.243	1.144	1.006	0.776	1.308
Q5TA02
P15121	1.26	1.047	1.949	1.545	0.653	0.506	0.546	0.916	1.705	2.253	1.178	1.841	1.333	0.713	0.448	0.836	1.612	2.085	1.52	1.145	0.817	1.814	1.18	1.506	0.693	1.289	1.426	1.264	0.707	0.623	0.996	0.676	1.307	1.224	0.857	1.821	1.025	0.644	1.128	1.298	0.987	1.14	0.64	1.776	1.149	1.164	1.037	0.811	1.348
P13798	1.341	1.144	2.062	1.601	0.66	0.49	0.571	0.943	1.865	2.149	1.259	2.033	1.462	0.796	0.45	1.007	1.708	2.35	1.506	1.186	0.807	1.84	1.274	1.579	0.765	1.319	1.564	1.518	0.8	0.697	1.123	0.818	1.476	1.405	0.926	2.115	1.062	0.753	1.198	1.441	1.147	1.161	0.655	1.751	1.279	1.179	1.083	0.802	1.333
Q15181	1.365	1.175	2.302	1.842	0.716	0.516	0.57	1.034	1.994	2.394	1.367	2.264	1.611	0.777	0.498	1.023	2.026	2.457	1.637	1.295	0.859	1.928	1.351	1.659	0.79	1.425	1.608	1.467	0.812	0.719	1.144	0.83	1.448	1.38	0.939	2.158	1.091	0.704	1.186	1.458	1.115	1.187	0.711	1.802	1.22	1.176	1.077	0.827	1.374
B1AKJ5	1.336	1.172	2.343	1.864	0.708	0.508	0.508	1.045	2.112	2.075	1.422	2.442	1.761	0.764	0.49	1.058	2.064	2.785	1.308	1.172	0.84	1.845	1.322	1.594	0.854	1.409	1.599	1.467	0.817	0.767	1.164	0.794	1.37	1.348	0.887	2.107	1.07	0.705	1.172	1.43	1.082	1.186	0.741	1.639	1.318	1.136	1.039	0.79	1.252
P05362	1.482	1.303	2.281	1.749	0.791	0.692	0.718	1.135	2.186	2.816	1.383	2.219	1.693	0.97	0.578	1.171	1.976	2.585	1.718	1.4	0.989	2.095	1.482	1.793	0.843	1.54	1.774	1.493	0.867	0.731	1.168	0.904	1.609	1.513	1.006	2.262	1.296	0.88	1.494	1.778	1.384	1.466	0.824	2.331	1.546	1.495	1.356	1.028	1.778
Q6P2E9	1.523	1.315	2.615	1.985	0.814	0.616	0.66	1.148	2.474	2.442	1.313	2.281	1.731	0.896	0.512	1.175	2.067	2.654	1.549	1.205	0.853	1.842	1.335	1.616	0.787	1.4	1.598	1.406	0.797	0.693	1.077	0.834	1.586	1.545	1.042	2.227	0.965	0.624	1.087	1.341	1.035	1.129	0.632	1.785	1.208	1.229	1.078	0.847	1.384
P49189	1.3	1.139	2.292	1.772	0.709	0.493	0.522	0.949	2.045	1.965	1.263	2.257	1.597	0.713	0.453	1.048	1.924	2.42	1.335	1.172	0.785	1.848	1.213	1.523	0.717	1.28	1.449	1.382	0.737	0.672	1.028	0.76	1.29	1.239	0.84	1.934	1.032	0.661	1.103	1.337	1.012	1.054	0.62	1.607	1.174	1.103	1.034	0.768	1.271
H3BNC9	1.395	1.165	2.411	1.811	0.704	0.485	0.55	0.95	2.043	2.422	1.348	2.398	1.689	0.823	0.463	1.106	1.78	2.532	1.526	1.313	0.85	2.012	1.39	1.663	0.781	1.386	1.711	1.569	0.837	0.747	1.24	0.836	1.45	1.395	0.885	2.308	1.043	0.678	1.155	1.454	1.08	1.064	0.618	1.597	1.187	1.165	1.105	0.751	1.258
P22090	1.358	1.116	2.19	1.697	0.641	0.477	0.548	0.935	1.906	2.038	1.268	2.302	1.546	0.696	0.422	0.937	1.844	2.49	1.524	1.287	0.845	1.934	1.364	1.732	0.825	1.43	1.581	1.415	0.773	0.705	1.106	0.752	1.34	1.317	0.852	2.057	1.094	0.664	1.203	1.409	1.161	1.159	0.697	1.608	1.196	1.212	1.096	0.796	1.311
Q9H2M9	1.37	1.145	2.191	1.729	0.706	0.51	0.531	0.994	1.935	1.908	1.242	2.039	1.505	0.693	0.431	0.917	1.813	2.359	1.522	1.2	0.857	1.888	1.274	1.627	0.772	1.417	1.546	1.308	0.769	0.677	1.034	0.741	1.319	1.315	0.909	1.958	1.013	0.641	1.132	1.351	1.038	1.105	0.693	1.612	1.145	1.186	1.092	0.825	1.253
P26196	1.288	1.134	2.298	1.794	0.674	0.556	0.581	1.046	2.242	2.459	1.253	2.25	1.652	0.802	0.496	1.122	2.025	2.48	1.609	1.24	0.833	1.941	1.285	1.635	0.762	1.475	1.683	1.328	0.804	0.708	1.116	0.83	1.531	1.432	1.003	2.164	1.033	0.681	1.208	1.466	1.111	1.231	0.718	1.753	1.306	1.172	1.058	0.799	1.351
P11498	1.346	1.154	2.104	1.71	0.678	0.526	0.55	0.998	2.019	2.157	1.339	2.262	1.662	0.769	0.501	0.983	2.017	2.669	1.464	1.345	1.011	2.018	1.453	1.806	0.969	1.54	1.645	1.446	0.832	0.755	1.179	0.832	1.459	1.412	0.986	2.347	1.056	0.698	1.202	1.457	1.151	1.125	0.704	1.651	1.319	1.175	1.1	0.797	1.283
P00918	1.527	1.287	2.293	1.846	0.761	0.584	0.653	0.955	2.05	2.696	1.379	2.213	1.614	0.917	0.556	0.98	1.901	2.481	1.782	1.445	0.945	2.097	1.426	1.734	0.843	1.515	1.647	1.573	0.85	0.754	1.184	0.782	1.404	1.393	0.934	2.202	1.259	0.777	1.33	1.566	1.2	1.275	0.718	1.95	1.36	1.333	1.204	0.922	1.567
P48739	1.354	1.165	2.291	1.796	0.687	0.519	0.576	0.988	2.076	2.318	1.341	2.399	1.681	0.796	0.479	1.075	2.048	2.642	1.505	1.221	0.833	1.944	1.308	1.667	0.759	1.401	1.619	1.415	0.778	0.71	1.112	0.812	1.392	1.323	0.885	2.091	1.123	0.723	1.24	1.546	1.155	1.234	0.704	1.855	1.358	1.172	1.061	0.78	1.341
Q96C19	1.365	1.15	2.083	1.608	0.656	0.536	0.601	1.094	1.918	2.336	1.287	2.006	1.443	0.779	0.484	0.954	1.813	2.164	1.567	1.231	0.824	1.859	1.3	1.51	0.714	1.297	1.465	1.467	0.813	0.7	1.09	0.813	1.329	1.341	0.906	1.987	1.146	0.758	1.192	1.509	1.138	1.172	0.635	1.809	1.313	1.177	1.11	0.794	1.297
Q8NC51	1.709	1.407	2.7	2.08	0.92	0.637	0.657	1.194	2.444	2.674	1.589	2.701	1.81	0.861	0.538	1.221	2.274	2.84	1.918	1.472	1.089	2.502	1.555	1.946	0.869	1.741	1.926	1.917	0.993	0.89	1.421	1.089	1.828	1.852	1.214	2.577	1.213	0.796	1.267	1.658	1.234	1.346	0.718	2.034	1.368	1.231	1.148	0.786	1.402
Q07960	1.367	1.177	2.429	1.887	0.726	0.569	0.624	1.105	2.265	2.353	1.231	2.179	1.552	0.839	0.564	1.133	1.992	2.45	1.463	1.262	0.914	2.1	1.476	1.899	0.855	1.625	1.805	1.398	0.833	0.732	1.167	0.843	1.521	1.483	0.993	2.195	1.103	0.718	1.236	1.624	1.23	1.34	0.739	1.913	1.418	1.196	1.092	0.794	1.37
Q96A33	1.436	1.204	2.576	1.999	0.755	0.649	0.782	1.127	2.44	2.189	1.269	2.319	1.568	0.736	0.431	1.035	2.078	2.502	1.415	1.05	0.794	1.775	1.158	1.508	0.693	1.197	1.466	1.253	0.738	0.644	1.076	0.73	1.386	1.317	0.85	1.999	1.052	0.615	1.136	1.45	1.06	1.117	0.641	1.693	1.193	1.103	0.999	0.761	1.28
G3V1V0	1.289	1.114	2.11	1.681	0.642	0.478	0.552	0.962	1.842	2.266	1.26	2.133	1.497	0.731	0.428	1.01	1.807	2.277	1.491	1.186	0.79	1.735	1.253	1.457	0.716	1.251	1.398	1.379	0.754	0.664	1.079	0.776	1.289	1.254	0.831	1.952	1.013	0.662	1.116	1.411	1.038	1.075	0.588	1.58	1.171	1.112	1.022	0.723	1.221
P09382	1.53	1.119	2.361	1.773	0.639	0.492	0.596	0.991	1.998	2.509	1.312	2.459	1.627	0.752	0.458	1.061	2.025	2.632	1.675	1.257	0.842	2.052	1.246	1.681	0.683	1.473	1.666	1.515	0.795	0.71	1.038	0.727	1.444	1.344	0.897	2.187	1.261	0.71	1.195	1.663	1.179	1.181	0.749	1.904	1.374	1.217	1.136	0.807	1.319
Q00653	1.473	1.335	2.827	2.28	0.829	0.706	0.64	1.336	2.563	2.116	1.33	2.308	1.654	0.767	0.505	1.04	2.052	2.674	1.456	1.321	0.906	1.971	1.372	1.804	0.938	1.635	1.782	1.385	0.798	0.744	1.208	0.877	1.542	1.536	1.044	2.182	1.225	0.86	1.468	1.685	1.427	1.471	0.903	2.097	1.559	1.227	1.202	0.9	1.564
P13929																																														1.064	0.994	0.837	1.187
Q9NTI5	1.264	1.115	2.152	1.627	0.695	0.57	0.584	1.005	2.021	2.213	1.247	2.072	1.454	0.762	0.461	0.877	1.796	2.324	1.279	1.099	0.796	1.797	1.265	1.575	0.796	1.353	1.51	1.333	0.727	0.657	1.063	0.764	1.311	1.287	0.905	1.946	1.072	0.68	1.233	1.464	1.135	1.22	0.726	1.839	1.241	1.18	1.075	0.751	1.308
O75694	1.345	1.181	2.182	1.767	0.724	0.533	0.529	1.032	2.083	1.769	1.137	1.919	1.39	0.615	0.415	0.943	1.859	2.134	1.246	1.259	0.879	2.022	1.472	1.776	0.912	1.544	1.716	1.32	0.765	0.712	1.098	0.81	1.342	1.248	0.875	1.99	1.17	0.693	1.207	1.655	1.243	1.111	0.769	1.631	1.532	1.194	1.084	0.826	1.384
P30740	1.338	1.154	2.128	1.66	0.671	0.517	0.567	0.935	1.952	2.233	1.218	2.111	1.489	0.737	0.462	0.944	1.646	2.31	1.591	1.201	0.799	1.85	1.256	1.509	0.731	1.246	1.456	1.418	0.754	0.665	1.094	0.74	1.298	1.245	0.831	1.98	1.058	0.668	1.157	1.366	1.046	1.091	0.652	1.67	1.172	1.107	1.005	0.739	1.248
P30048	1.231	1.038	1.846	1.458	0.619	0.442	0.512	0.846	1.634	2.122	1.188	2.021	1.424	0.694	0.419	0.855	1.589	2.149	1.46	1.135	0.734	1.613	1.168	1.37	0.625	1.107	1.219	1.273	0.7	0.618	1.004	0.691	1.182	1.148	0.756	1.806	1.015	0.639	1.043	1.317	0.993	1.005	0.58	1.529	1.115	1.094	1.003	0.733	1.216
P05091	1.082	0.962	1.939	1.557	0.571	0.435	0.421	0.896	1.785	1.757	1.176	2.033	1.385	0.632	0.43	0.88	1.856	2.212	1.143	1	0.688	1.575	1.144	1.377	0.691	1.151	1.269	1.215	0.684	0.627	0.97	0.688	1.241	1.149	0.79	1.867	0.904	0.581	0.981	1.258	0.938	0.959	0.585	1.394	1.078	0.96	0.877	0.667	1.096
P02649	1.228	1.069	1.994	1.523	0.654	0.508	0.544	0.958	1.894	2.145	1.133	1.825	1.279	0.717	0.428	1.037	1.682	2.05	1.578	1.046	0.761	1.686	1.158	1.498	0.575	1.157	1.447	1.31	0.697	0.596	0.959	0.704	1.271	1.2	0.767	1.833	0.967	0.63	1.138	1.395	1.02	1.063	0.587	1.754	1.253	1.153	0.97	0.754	1.282
Q8NBS9	1.26	1.131	1.929	1.585	0.707	0.547	0.592	1.066	1.863	2.146	1.222	2.021	1.488	0.737	0.445	1.024	1.803	2.26	1.551	1.229	0.841	1.932	1.321	1.634	0.759	1.354	1.565	1.367	0.749	0.689	1.085	0.833	1.458	1.447	0.954	2.144	1.057	0.693	1.235	1.536	1.184	1.205	0.677	1.827	1.383	1.175	1.073	0.806	1.358
P42285	1.333	1.107	2.18	1.685	0.709	0.503	0.545	0.963	1.989	2.158	1.257	2.196	1.543	0.743	0.422	1.004	1.995	2.462	1.386	1.161	0.834	1.889	1.27	1.604	0.761	1.383	1.573	1.282	0.745	0.688	1.008	0.784	1.365	1.31	0.91	1.98	1.071	0.636	1.186	1.423	1.085	1.176	0.703	1.75	1.211	1.184	1.06	0.835	1.339
Q15691	1.313	1.164	2.224	1.699	0.654	0.466	0.512	1.025	1.897	2.196	1.323	2.392	1.694	0.756	0.445	1.116	2.198	2.536	1.402	1.205	0.781	1.803	1.313	1.576	0.748	1.316	1.524	1.404	0.761	0.664	1.065	0.776	1.278	1.243	0.804	2.028	1.021	0.673	1.118	1.457	1.064	1.071	0.632	1.556	1.216	1.174	1.079	0.75	1.382
Q9Y5X1	1.313	1.129	2.182	1.706	0.681	0.517	0.562	1.031	2.031	2.036	1.256	2.233	1.596	0.73	0.481	1.113	2.087	2.584	1.326	1.052	0.71	1.715	1.216	1.453	0.701	1.336	1.624	1.232	0.693	0.604	0.967	0.718	1.28	1.212	0.846	1.915	1.039	0.68	1.161	1.411	1.071	1.152	0.677	1.657	1.197	1.17	1.033	0.782	1.328
Q13347	1.333	1.104	2.027	1.564	0.654	0.501	0.588	0.9	1.84	2.166	1.231	2.018	1.47	0.756	0.459	1.02	1.765	2.269	1.657	1.174	0.841	1.983	1.247	1.544	0.722	1.314	1.495	1.358	0.741	0.656	1.045	0.718	1.29	1.272	0.862	1.987	1.129	0.712	1.188	1.469	1.11	1.157	0.666	1.806	1.209	1.205	1.064	0.816	1.327
Q15833	1.31	1.133	2.14	1.638	0.692	0.484	0.539	0.992	1.939	1.939	1.217	2.072	1.486	0.743	0.458	0.915	1.759	2.267	1.291	1.32	0.835	1.927	1.405	1.853	0.909	1.559	1.838	1.268	0.802	0.708	0.981	0.75	1.285	1.254	0.81	1.922	1.081	0.703	1.135	1.402	1.1	1.182	0.688	1.645	1.286	1.118	1.006	0.791	1.258
Q96P70	1.288	1.074	2.074	1.594	0.682	0.593	0.606	0.983	1.86	1.975	1.196	2.025	1.368	0.725	0.473	1.013	1.89	2.201	1.399	1.241	0.849	1.91	1.39	1.673	0.875	1.489	1.707	1.214	0.767	0.711	1.081	0.769	1.416	1.325	0.916	1.996	1.042	0.728	1.187	1.525	1.128	1.198	0.755	1.736	1.345	1.155	1.041	0.8	1.246
Q9Y376	1.4	1.193	2.249	1.701	0.718	0.507	0.509	1.074	1.836	2.252	1.309	2.098	1.538	0.784	0.481	1.027	1.882	2.286	1.531	1.203	0.851	1.786	1.275	1.524	0.722	1.311	1.456	1.435	0.794	0.724	1.096	0.87	1.477	1.43	0.948	2.118	1.093	0.687	1.118	1.491	1.098	1.124	0.592	1.687	1.243	1.259	1.143	0.767	1.355
Q13596	1.249	1.145	2.189	1.759	0.638	0.48	0.489	1.095	2.008	1.904	1.228	2.163	1.501	0.7	0.399	1.098	1.992	2.466	1.222	1.133	0.765	1.793	1.293	1.589	0.782	1.398	1.651	1.315	0.769	0.692	1.037	0.8	1.437	1.377	0.894	2.013	0.981	0.657	1.105	1.406	1.064	1.151	0.644	1.586	1.248	1.105	1.041	0.793	1.254
P20073	1.209	1.096	2.171	1.709	0.632	0.473	0.559	1.009	2.018	2.165	1.229	2.12	1.482	0.725	0.421	1.032	1.877	2.344	1.393	1.113	0.77	1.767	1.22	1.533	0.713	1.242	1.509	1.29	0.736	0.685	1.028	0.726	1.333	1.254	0.869	1.962	1.032	0.722	1.16	1.417	1.086	1.135	0.659	1.683	1.26	1.137	1.064	0.813	1.314
P62834	1.371	1.193	2.563	2.013	0.697	0.482	0.592	1.092	2.259	2.363	1.418	2.561	1.783	0.73	0.451	1.095	2.351	2.679	1.717	1.252	0.826	2.096	1.399	1.769	0.751	1.366	1.731	1.354	0.744	0.699	1.136	0.731	1.361	1.219	0.827	2.006	1.097	0.698	1.222	1.645	1.148	1.189	0.664	1.797	1.35	1.243	1.056	0.761	1.446
Q16831	1.267	1.066	1.862	1.523	0.691	0.506	0.588	0.939	1.79	2.449	1.202	1.88	1.359	0.752	0.459	0.988	1.876	2.174	1.654	1.199	0.847	1.879	1.268	1.643	0.76	1.451	1.644	1.39	0.774	0.685	1.057	0.769	1.39	1.395	0.934	2.069	1.095	0.704	1.191	1.462	1.122	1.245	0.716	1.89	1.266	1.175	1.084	0.859	1.346
P61224	1.331	1.122	2.244	1.82	0.642	0.477	0.54	1.091	2.082	2.084	1.137	1.885	1.382	0.65	0.483	0.99	1.773	2.084	1.634	1.171	0.771	1.846	1.239	1.542	0.744	1.314	1.494	1.428	0.801	0.681	1.124	0.769	1.444	1.387	0.918	2.098	1.076	0.694	1.185	1.488	1.112	1.147	0.672	1.835	1.297	1.162	1.031	0.786	1.351
P25789	1.269	1.063	1.933	1.54	0.605	0.447	0.489	0.913	1.725	2.078	1.308	2.161	1.577	0.741	0.471	1	1.752	2.37	1.426	1.174	0.783	1.759	1.231	1.479	0.693	1.271	1.554	1.338	0.723	0.653	1.012	0.723	1.254	1.22	0.805	1.858	1.072	0.704	1.173	1.401	1.083	1.128	0.668	1.671	1.315	1.133	1.04	0.759	1.234
Q13428	1.319	1.128	1.966	1.481	0.679	0.585	0.558	0.89	1.794	2.012	1.026	1.665	1.269	0.645	0.389	0.872	1.509	1.935	1.364	1.101	0.843	1.808	1.202	1.508	0.718	1.355	1.545	1.338	0.714	0.669	1.035	0.823	1.434	1.395	0.941	1.913	1.066	0.717	1.187	1.434	1.128	1.269	0.655	1.873	1.246	1.147	1.018	0.763	1.39
P61247	1.318	1.096	2.21	1.706	0.629	0.482	0.553	0.953	1.95	2.109	1.162	1.962	1.378	0.689	0.429	1.003	1.712	2.163	1.622	1.233	0.814	1.954	1.233	1.614	0.68	1.274	1.527	1.324	0.74	0.658	1.038	0.712	1.316	1.227	0.809	2.015	0.964	0.611	1.086	1.333	0.981	1.015	0.572	1.637	1.1	1.088	1.013	0.72	1.239
Q8WU79	1.375	1.226	2.335	1.775	0.71	0.544	0.587	1.038	2.029	2.292	1.372	2.396	1.699	0.785	0.495	1.049	2.008	2.596	1.617	1.226	0.878	1.902	1.276	1.544	0.722	1.336	1.537	1.398	0.774	0.707	1.096	0.781	1.356	1.299	0.895	1.97	1.116	0.672	1.223	1.48	1.136	1.237	0.707	1.867	1.265	1.21	1.077	0.813	1.318
Q9UBB4	1.412	1.206	2.257	1.751	0.712	0.628	0.736	1.145	2.206	2.433	1.361	2.359	1.696	0.897	0.519	1.107	2.065	2.548	1.576	1.206	0.871	1.896	1.306	1.756	0.775	1.505	1.767	1.267	0.752	0.669	1.024	0.784	1.435	1.375	0.901	1.991	1.112	0.714	1.17	1.532	1.129	1.26	0.673	1.783	1.401	1.212	1.125	0.829	1.371
Q13409	1.237	1.012	1.855	1.433	0.646	0.56	0.608	0.96	1.704	2.394	1.113	1.766	1.269	0.767	0.445	0.935	1.653	2.019	1.746	1.217	0.844	1.871	1.288	1.612	0.721	1.456	1.544	1.37	0.776	0.659	1.076	0.795	1.438	1.411	0.91	2.055	1.113	0.702	1.31	1.595	1.223	1.37	0.721	2.088	1.292	1.284	1.084	0.84	1.35
P05141	1.418	1.152	2.278	1.825	0.698	0.504	0.545	1.01	1.982	2.202	1.225	2.083	1.513	0.699	0.508	0.964	1.88	2.269	1.743	1.274	0.869	1.954	1.298	1.634	0.723	1.323	1.582	1.432	0.788	0.743	1.126	0.766	1.374	1.275	0.873	2.093	1.152	0.74	1.257	1.516	1.112	1.173	0.685	1.846	1.332	1.195	1.108	0.815	1.441
Q13561	1.382	1.251	2.456	1.914	0.723	0.544	0.553	1.142	2.227	2.193	1.295	2.253	1.63	0.798	0.502	1.14	2.001	2.538	1.518	1.225	0.85	1.926	1.321	1.738	0.764	1.417	1.721	1.402	0.812	0.692	1.143	0.882	1.481	1.468	0.957	2.284	1.076	0.739	1.225	1.571	1.194	1.251	0.688	1.835	1.381	1.171	1.136	0.795	1.431
P18085	1.354	1.162	2.384	1.889	0.685	0.514	0.546	1.056	2.088	2.04	1.405	2.658	1.829	0.685	0.436	1.217	2.324	2.789	1.727	1.214	0.787	1.936	1.268	1.581	0.752	1.276	1.508	1.436	0.773	0.702	1.18	0.814	1.354	1.305	0.878	2.085	1.058	0.645	1.13	1.441	1.068	1.086	0.684	1.599	1.244	1.207	1.07	0.734	1.3
D6RER5	1.148	0.99	1.878	1.438	0.62	0.541	0.591	0.918	1.754	2.095	1.046	1.664	1.198	0.663	0.436	0.868	1.63	1.84	1.481	1.166	0.787	1.729	1.201	1.501	0.702	1.266	1.373	1.295	0.716	0.672	1.03	0.723	1.354	1.358	0.872	1.88	1.035	0.647	1.183	1.417	1.09	1.307	0.681	1.91	1.249	1.134	1.013	0.768	1.264
P51665	1.327	1.13	2.103	1.651	0.733	0.601	0.671	1.055	2.078	2.006	1.327	2.187	1.518	0.68	0.435	0.957	2.059	2.381	1.527	1.164	0.796	1.845	1.291	1.601	0.778	1.367	1.558	1.418	0.842	0.692	1.121	0.825	1.475	1.487	0.965	2.156	1.02	0.636	1.14	1.373	1.042	1.089	0.628	1.783	1.174	1.148	1.032	0.754	1.312
A0A0A0MSK5	1.328	1.189	2.151	1.699	0.655	0.543	0.616	1.011	2.058	2.17	1.185	2.016	1.477	0.701	0.441	1.022	1.76	2.255	1.568	1.183	0.831	1.807	1.227	1.474	0.712	1.307	1.496	1.288	0.73	0.652	1.053	0.744	1.284	1.306	0.826	1.938	0.991	0.632	1.111	1.379	1.057	1.15	0.627	1.692	1.217	1.124	1.036	0.765	1.287
P50281	1.323	1.136	2.218	1.764	0.704	0.538	0.654	1.112	2.057	2.102	1.206	2.115	1.49	0.723	0.431	1.162	2.043	2.317	1.523	1.126	0.813	1.924	1.26	1.631	0.736	1.392	1.647	1.295	0.729	0.662	1.052	0.74	1.354	1.272	0.855	1.983	1.054	0.658	1.16	1.468	1.131	1.097	0.659	1.708	1.238	1.257	1.065	0.847	1.413
P30085	1.43	1.248	2.768	2.203	0.716	0.557	0.563	1.223	2.524	2.213	1.429	2.631	1.781	0.741	0.506	1.218	2.349	2.793	1.554	1.272	0.914	2.241	1.447	1.891	0.848	1.611	1.988	1.58	0.832	0.751	1.292	0.855	1.467	1.428	0.904	2.183	1.148	0.688	1.245	1.597	1.161	1.267	0.72	1.911	1.383	1.311	1.113	0.774	1.469
P05534	1.306	1.182	2.314	1.836	0.737	0.573	0.637	1.086	2.153	2.297	1.369	2.599	1.796	0.859	0.505	1.243	2.164	2.889	1.597	1.158	0.833	1.951	1.305	1.686	0.759	1.388	1.803	1.354	0.755	0.644	1.119	0.818	1.473	1.393	0.95	2.15	1.086	0.721	1.244	1.633	1.177	1.362	0.746	2.052	1.505	1.225	1.111	0.86	1.432
P30040	1.414	1.117	2.406	1.758	0.632	0.46	0.534	1.053	1.962	2.31	1.314	2.379	1.595	0.786	0.46	1.058	1.865	2.28	1.66	1.149	0.804	1.759	1.25	1.551	0.657	1.259	1.437	1.489	0.75	0.733	1.069	0.78	1.345	1.284	0.848	2.011	1.216	0.718	1.231	1.59	1.212	1.173	0.643	1.84	1.374	1.192	1.06	0.746	1.307
P56537	1.282	1.137	2.159	1.722	0.685	0.549	0.607	1.077	2.045	2.177	1.298	2.143	1.683	0.844	0.496	1.117	1.919	2.451	1.637	1.185	0.812	1.747	1.281	1.5	0.705	1.38	1.453	1.33	0.831	0.681	1.095	0.834	1.408	1.431	0.961	2.171	1.056	0.727	1.237	1.522	1.207	1.183	0.713	1.937	1.337	1.19	1.101	0.851	1.416
P61011	1.248	1.05	2.082	1.73	0.656	0.511	0.481	0.978	1.957	1.884	1.33	2.453	1.673	0.658	0.487	1.11	2.152	2.642	1.248	1.163	0.746	1.793	1.321	1.542	0.786	1.33	1.58	1.245	0.7	0.613	0.947	0.683	1.306	1.239	0.807	1.762	1.048	0.652	1.145	1.514	1.095	1.123	0.656	1.646	1.304	1.138	1.033	0.763	1.331
Q9UJU6	1.328	1.18	2.098	1.571	0.709	0.592	0.642	1.109	2.006	2.297	1.316	2.158	1.526	0.807	0.491	1.239	1.968	2.433	1.464	1.152	0.908	2.006	1.328	1.757	0.745	1.538	1.755	1.382	0.824	0.715	1.148	0.885	1.522	1.444	1.019	2.13	1.114	0.74	1.201	1.613	1.229	1.319	0.727	2	1.309	1.197	1.07	0.841	1.438
P24539	1.287	1.108	1.919	1.483	0.669	0.516	0.546	0.915	1.753	1.998	1.21	1.918	1.386	0.682	0.416	1.051	1.787	2.154	1.465	1.199	0.855	1.887	1.274	1.566	0.784	1.393	1.507	1.398	0.788	0.678	1.104	0.789	1.351	1.335	0.88	1.939	1.072	0.717	1.174	1.389	1.117	1.174	0.691	1.704	1.228	1.175	1.064	0.798	1.313
K7EJH8
O94925	1.388	1.155	2.376	1.889	0.669	0.481	0.595	1.044	2.156	2.005	1.243	2.232	1.564	0.669	0.381	0.999	1.998	2.424	1.436	1.234	0.835	1.991	1.354	1.698	0.812	1.48	1.648	1.426	0.789	0.739	1.15	0.816	1.406	1.436	0.937	2.124	1.088	0.71	1.195	1.517	1.138	1.222	0.704	1.69	1.333	1.239	1.12	0.836	1.408
Q14289	1.298	1.16	2.184	1.578	0.731	0.559	0.756	0.986	2.086	2.339	1.292	2.157	1.592	0.85	0.523	1.144	2.072	2.462	1.724	1.257	0.92	2.054	1.447	1.854	0.903	1.552	1.779	1.347	0.785	0.651	1.125	0.813	1.383	1.395	0.983	2.288	1.12	0.681	1.241	1.55	1.267	1.246	0.706	1.956	1.336	1.126	1.054	0.773	1.236
P61201	1.435	1.235	2.453	1.904	0.732	0.551	0.541	1.09	2.203	2.111	1.373	2.523	1.806	0.759	0.488	1.11	2.381	2.72	1.407	1.232	0.856	1.895	1.327	1.618	0.783	1.382	1.503	1.444	0.769	0.732	1.128	0.807	1.432	1.396	0.961	2.199	1.086	0.685	1.135	1.49	1.137	1.192	0.679	1.764	1.313	1.133	1.024	0.743	1.294
O14744	1.282	1.109	2.118	1.655	0.703	0.522	0.586	0.957	1.939	2.253	1.235	2.083	1.498	0.791	0.484	1.012	1.807	2.388	1.439	1.171	0.833	1.85	1.246	1.587	0.738	1.384	1.52	1.321	0.756	0.686	1.054	0.748	1.316	1.249	0.846	1.963	1.076	0.714	1.221	1.453	1.132	1.212	0.692	1.842	1.284	1.169	1.062	0.816	1.314
Q5TCU3	1.318	1.04	2.062	1.617	0.621	0.485	0.564	1.113	1.855	2.471	1.367	2.334	1.581	0.838	0.488	1.11	2.211	2.478	1.652	1.186	0.853	1.837	1.303	1.593	0.676	1.295	1.625	1.476	0.8	0.696	1.195	0.883	1.482	1.395	0.94	2.166	1.112	0.703	1.202	1.524	1.163	1.12	0.587	1.743	1.31	1.252	1.131	0.782	1.362
P13804	1.29	1.12	2.148	1.669	0.673	0.478	0.492	0.918	1.881	1.917	1.187	1.971	1.515	0.684	0.436	0.888	1.667	2.213	1.473	1.155	0.826	1.729	1.214	1.432	0.686	1.243	1.337	1.389	0.764	0.653	1.043	0.817	1.241	1.207	0.803	1.94	1.029	0.68	1.12	1.372	1.09	1.099	0.64	1.703	1.17	1.137	1.007	0.72	1.189
P46821	1.279	1.083	1.883	1.496	0.637	0.58	0.608	0.994	1.835	2.367	1.165	1.904	1.355	0.756	0.485	0.951	1.657	2.169	1.467	1.018	0.843	1.68	1.049	1.321	0.651	1.263	1.184	1.231	0.805	0.636	0.992	0.758	1.293	1.227	0.861	1.809	1.009	0.662	1.084	1.288	0.95	1.095	0.611	1.625	1.08	1.088	0.994	0.71	1.207
Q8N1G4	1.332	1.124	2.14	1.67	0.724	0.562	0.585	0.978	1.961	2.029	1.238	2.062	1.472	0.719	0.452	1.026	1.87	2.325	1.585	1.189	0.841	1.927	1.287	1.595	0.748	1.367	1.511	1.371	0.776	0.676	1.058	0.812	1.332	1.302	0.913	1.956	1.035	0.672	1.181	1.483	1.101	1.2	0.655	1.827	1.256	1.182	1.046	0.814	1.247
O00267	1.293	1.063	1.991	1.533	0.685	0.58	0.616	0.986	1.994	2.31	1.156	1.8	1.267	0.742	0.443	1.012	1.737	2.101	1.449	1.168	0.834	1.85	1.305	1.615	0.769	1.439	1.587	1.304	0.784	0.678	1.058	0.792	1.44	1.382	0.962	1.994	0.976	0.648	1.133	1.378	1.065	1.129	0.675	1.743	1.173	1.123	1.019	0.802	1.292
Q6PKG0	1.334	1.134	2.266	1.746	0.7	0.546	0.554	1.014	1.988	2.312	1.137	1.935	1.349	0.774	0.46	0.97	1.7	2.15	1.569	1.169	0.937	1.857	1.288	1.654	0.775	1.438	1.441	1.384	0.844	0.703	1.076	0.851	1.548	1.412	1.003	2.101	1.07	0.708	1.23	1.452	1.118	1.226	0.698	1.888	1.216	1.133	1.034	0.79	1.314
Q9H0U4	1.266	1.037	2.076	1.635	0.624	0.503	0.537	0.936	1.939	2.226	1.269	2.458	1.619	0.729	0.445	1.04	2.198	2.589	1.406	1.229	0.759	2.042	1.328	1.69	0.67	1.326	1.865	1.425	0.773	0.692	1.165	0.766	1.395	1.297	0.849	2.145	1.018	0.65	1.116	1.475	1.016	1.028	0.596	1.617	1.243	1.08	0.969	0.705	1.21
O96019	1.281	1.129	2.228	1.721	0.703	0.5	0.529	1.043	2.149	2.027	1.203	1.955	1.358	0.684	0.439	0.985	1.817	2.194	1.447	1.133	0.826	1.814	1.292	1.586	0.707	1.363	1.547	1.278	0.767	0.656	1.031	0.763	1.334	1.281	0.875	1.96	1.094	0.711	1.188	1.498	1.124	1.168	0.669	1.676	1.297	1.105	1.004	0.769	1.291
Q13501	1.388	1.215	2.46	1.866	0.745	0.585	0.643	1.167	2.224	2.574	1.23	1.998	1.426	0.816	0.454	1.082	1.875	2.241	1.665	1.202	0.852	1.936	1.279	1.574	0.707	1.3	1.476	1.386	0.804	0.705	1.129	0.818	1.463	1.404	0.91	2.18	1.124	0.689	1.251	1.514	1.077	1.262	0.687	1.943	1.269	1.295	1.145	0.87	1.432
Q92619	1.314	1.093	1.962	1.449	0.677	0.627	0.711	0.913	1.841	2.498	1.13	1.793	1.339	0.806	0.477	1.022	1.677	2.058	1.538	1.24	0.833	1.898	1.279	1.608	0.732	1.385	1.478	1.35	0.765	0.645	1.088	0.806	1.358	1.323	0.864	1.983	1.094	0.665	1.191	1.475	1.114	1.172	0.652	1.798	1.207	1.169	1.054	0.802	1.273
P33121	1.319	1.107	2.087	1.61	0.648	0.51	0.606	0.951	1.959	2.112	1.285	2.252	1.575	0.802	0.437	1.022	2.006	2.435	1.493	1.16	0.768	1.784	1.212	1.572	0.723	1.307	1.568	1.254	0.698	0.656	1.037	0.733	1.258	1.27	0.882	1.941	0.952	0.674	1.065	1.253	1.016	1.034	0.631	1.552	1.115	1.058	0.965	0.699	1.172
P00505	1.289	1.034	1.958	1.546	0.611	0.448	0.5	0.886	1.727	1.953	1.203	2.098	1.58	0.673	0.418	1.025	1.836	2.332	1.258	1.12	0.729	1.709	1.223	1.458	0.688	1.313	1.407	1.262	0.715	0.644	0.993	0.76	1.261	1.224	0.846	1.844	1.046	0.674	1.104	1.443	1.11	1.161	0.687	1.668	1.347	1.11	1.006	0.747	1.246
Q32P51
Q5W0H4	1.299	1.111	2.088	1.637	0.669	0.461	0.583	0.893	1.856	2.37	1.367	2.321	1.657	0.767	0.434	1.05	1.84	2.425	1.492	1.234	0.788	1.905	1.278	1.567	0.694	1.248	1.415	1.543	0.788	0.671	1.176	0.807	1.399	1.35	0.887	2.15	1.035	0.643	1.107	1.362	1.031	1.065	0.579	1.509	1.15	1.103	1.025	0.718	1.258
Q9UMS4	1.241	1.051	1.942	1.479	0.641	0.489	0.505	0.887	1.734	1.869	1.174	1.955	1.367	0.644	0.426	0.905	1.701	2.2	1.399	1.12	0.773	1.664	1.165	1.418	0.719	1.235	1.337	1.272	0.741	0.653	1.019	0.702	1.243	1.194	0.81	1.864	1.106	0.731	1.215	1.439	1.116	1.202	0.707	1.75	1.207	1.171	1.1	0.842	1.376
Q13451	1.352	1.147	2.18	1.694	0.668	0.527	0.581	0.954	1.944	2.378	1.316	2.185	1.472	0.787	0.44	0.993	1.936	2.384	1.674	1.28	0.884	2.058	1.349	1.647	0.754	1.372	1.722	1.408	0.75	0.679	1.078	0.782	1.385	1.375	0.891	2.117	1.188	0.773	1.325	1.585	1.223	1.277	0.735	1.954	1.394	1.299	1.19	0.879	1.494
P16152	1.304	1.146	2.36	1.814	0.687	0.526	0.553	1.023	2.121	2.083	1.308	2.348	1.628	0.725	0.443	1.046	2.019	2.527	1.515	1.084	0.782	1.728	1.17	1.44	0.672	1.236	1.546	1.268	0.727	0.631	1.03	0.746	1.264	1.255	0.829	1.935	1.071	0.709	1.185	1.462	1.111	1.133	0.642	1.774	1.266	1.095	1.005	0.751	1.263
Q14344	1.315	1.142	2.111	1.661	0.688	0.525	0.583	0.996	1.994	2.251	1.335	2.204	1.58	0.799	0.505	0.969	1.858	2.472	1.589	1.163	0.798	1.757	1.195	1.479	0.715	1.193	1.401	1.358	0.787	0.678	1.044	0.776	1.398	1.344	0.899	2.066	1.053	0.672	1.199	1.411	1.087	1.176	0.672	1.751	1.24	1.133	1.024	0.789	1.264
P67775	1.234	1.117	2.041	1.623	0.615	0.449	0.586	1.008	1.908	2.739	1.261	2.396	1.573	0.883	0.439	1.033	1.914	2.395	1.79	1.117	0.838	1.713	1.147	1.45	0.597	1.141	1.401	1.333	0.723	0.677	1.032	0.751	1.174	1.136	0.73	1.876	1.092	0.667	1.122	1.439	1.068	1.061	0.604	1.723	1.199	1.185	1.064	0.748	1.294
Q14568																																														0.974	0.988	1.048	1.241
P48637	1.271	1.124	2.167	1.657	0.674	0.527	0.524	1.053	1.974	2.163	1.315	2.252	1.598	0.762	0.491	1.066	2.065	2.522	1.51	1.196	0.829	1.815	1.247	1.541	0.746	1.287	1.463	1.349	0.795	0.716	1.075	0.819	1.398	1.416	0.927	2.055	1.02	0.65	1.133	1.417	1.098	1.144	0.65	1.808	1.241	1.131	1.039	0.747	1.305
P62081	1.263	0.978	1.801	1.421	0.593	0.467	0.507	0.776	1.514	2.136	1.255	2.038	1.413	0.692	0.462	0.846	1.623	2.223	1.681	1.244	0.796	1.843	1.215	1.462	0.688	1.196	1.294	1.409	0.761	0.7	1.055	0.716	1.237	1.175	0.806	1.884	1.05	0.627	1.123	1.328	1.001	1.036	0.614	1.521	1.077	1.108	1.015	0.749	1.217
Q709C8	1.303	1.084	2.202	1.649	0.706	0.602	0.627	1.033	1.969	2.319	1.577	2.766	1.948	0.79	0.543	1.052	2.339	3.186	1.364	1.228	0.869	2.018	1.351	1.917	0.913	1.748	1.775	1.297	0.778	0.729	0.996	0.79	1.497	1.422	0.942	2.007	0.954	0.678	1.146	1.455	1.136	1.345	0.716	1.956	1.247	1.085	0.99	0.777	1.252
Q9Y520	1.325	1.016	1.802	1.388	0.694	0.567	0.663	1.022	1.759	2.701	1.192	1.696	1.206	0.886	0.456	1.011	1.472	2	1.667	1.161	0.944	2.042	1.254	1.705	0.773	1.425	1.595	1.283	0.704	0.672	1.011	0.813	1.369	1.406	0.922	1.961	1.108	0.743	1.357	1.728	1.284	1.382	0.808	2.208	1.514	1.19	1.138	0.874	1.377
Q9Y6M1	1.252	1.05	1.983	1.471	0.636	0.474	0.519	0.873	1.681	2.13	1.168	1.908	1.348	0.715	0.423	0.94	1.626	2.125	1.507	1.154	0.801	1.727	1.193	1.465	0.69	1.283	1.36	1.377	0.75	0.664	1.031	0.761	1.334	1.264	0.867	1.976	1.069	0.676	1.162	1.383	1.084	1.201	0.667	1.766	1.169	1.141	1.029	0.803	1.245
B0QZ18	1.41	1.175	2.269	1.784	0.676	0.508	0.522	0.978	2.03	2.09	1.282	2.247	1.601	0.703	0.45	1.002	1.919	2.515	1.503	1.266	0.883	1.948	1.348	1.688	0.815	1.472	1.651	1.451	0.765	0.702	1.119	0.79	1.321	1.293	0.88	2.051	1.106	0.709	1.164	1.469	1.137	1.184	0.711	1.695	1.319	1.182	1.058	0.825	1.321
Q09028	1.23	1.026	1.892	1.489	0.625	0.453	0.543	0.818	1.635	2.245	1.201	1.971	1.398	0.742	0.42	0.912	1.579	2.128	1.643	1.134	0.753	1.773	1.18	1.399	0.608	1.11	1.29	1.343	0.728	0.66	1.039	0.688	1.219	1.15	0.765	1.854	1.067	0.658	1.118	1.437	1.043	1.007	0.591	1.608	1.218	1.123	1.008	0.742	1.242
O43488	1.355	1.252	2.496	1.985	0.72	0.56	0.602	1.146	2.261	2.153	1.363	2.344	1.642	0.715	0.45	1.241	2.266	2.509	1.591	1.259	0.872	1.968	1.32	1.677	0.806	1.402	1.584	1.493	0.869	0.8	1.195	0.845	1.526	1.428	0.987	2.222	1.083	0.713	1.239	1.505	1.132	1.202	0.68	1.78	1.278	1.229	1.1	0.81	1.402
P20936	1.412	1.144	2.122	1.73	0.71	0.537	0.637	1.054	1.999	1.458	1.386	2.355	1.615	0.628	0.471	1.155	2.291	2.68	1.349	1.299	0.918	2.04	1.402	1.745	0.914	1.493	1.742	1.423	0.866	0.76	1.148	0.842	1.417	1.377	0.923	2.141	1.109	0.703	1.166	1.553	1.15	1.262	0.696	1.789	1.303	1.235	1.135	0.835	1.452
Q03405	1.347	1.091	1.961	1.538	0.716	0.582	0.674	1.041	1.9	2.535	1.159	1.812	1.345	0.779	0.473	1.077	1.959	2.248	1.662	1.172	0.898	2.02	1.277	1.676	0.737	1.47	1.636	1.472	0.829	0.687	1.195	0.906	1.66	1.578	1.013	2.315	1.185	0.786	1.421	1.827	1.374	1.499	0.798	2.312	1.548	1.369	1.271	0.941	1.635
Q07065	1.303	1.079	1.892	1.482	0.718	0.591	0.648	0.92	1.802	1.827	1.106	1.667	1.267	0.653	0.395	0.896	1.73	2.049	1.393	1.216	0.866	1.869	1.29	1.618	0.756	1.437	1.526	1.381	0.725	0.731	1.178	0.886	1.601	1.667	1.015	2.189	1.013	0.758	1.22	1.555	1.163	1.181	0.717	2.177	1.255	1.092	1.019	0.79	1.304
P43034	1.269	1.041	1.99	1.549	0.597	0.45	0.53	0.999	1.755	2.069	1.281	2.177	1.502	0.709	0.422	1.008	1.883	2.34	1.597	1.188	0.833	1.951	1.278	1.566	0.71	1.391	1.466	1.321	0.77	0.656	1.016	0.744	1.363	1.269	0.888	1.95	1.096	0.711	1.204	1.466	1.138	1.156	0.685	1.717	1.263	1.239	1.064	0.891	1.405
P15170	1.311	1.117	2.176	1.693	0.657	0.525	0.595	0.998	1.956	2.059	1.218	2.141	1.539	0.734	0.455	0.947	1.73	2.461	1.519	1.17	0.805	1.812	1.198	1.471	0.738	1.244	1.465	1.378	0.765	0.697	1.096	0.759	1.391	1.287	0.875	2.039	1.059	0.674	1.186	1.44	1.081	1.136	0.65	1.737	1.202	1.161	1.071	0.82	1.239
Q07021	1.247	1.18	2.265	1.838	0.682	0.51	0.557	1.183	2.111	2.009	1.294	2.264	1.615	0.737	0.408	1.15	2.126	2.48	1.472	1.132	0.758	1.746	1.251	1.459	0.646	1.177	1.514	1.301	0.745	0.654	1.086	0.776	1.304	1.218	0.794	1.955	1.008	0.683	1.115	1.485	1.071	1.036	0.624	1.615	1.253	1.212	1.064	0.822	1.365
P62820	1.259	1.044	1.952	1.571	0.632	0.448	0.513	0.925	1.774	2.143	1.212	2.196	1.497	0.681	0.379	0.984	1.85	2.358	1.367	1.137	0.778	1.713	1.198	1.456	0.71	1.243	1.408	1.33	0.724	0.637	1.037	0.743	1.262	1.231	0.805	1.912	0.991	0.614	1.112	1.328	0.985	1.069	0.591	1.651	1.14	1.102	0.966	0.716	1.198
P48681	1.317	1.127	1.771	1.26	0.903	0.731	0.669	0.987	1.741	2.907	1.183	1.908	1.57	1.018	0.543	1.087	1.703	2.208	1.406	1.299	0.937	2.089	1.356	2.18	0.912	1.664	2.052	1.359	0.779	0.721	1.205	0.833	1.561	1.495	1.086	2.243	1.075	0.794	1.258	1.733	1.236	1.361	0.704	1.931	1.35	1.228	1.048	0.91	1.475
Q13283	1.336	1.081	2.17	1.667	0.68	0.527	0.572	0.999	1.992	2.111	1.226	2.069	1.541	0.718	0.455	1.018	1.886	2.429	1.425	1.181	0.847	1.95	1.4	1.68	0.802	1.534	1.625	1.38	0.781	0.697	1.077	0.819	1.436	1.421	0.917	2.021	1.167	0.719	1.28	1.57	1.218	1.266	0.738	1.822	1.273	1.187	1.114	0.814	1.396
H0Y7A7	1.224	1.092	1.986	1.605	0.618	0.472	0.563	0.983	1.823	2.116	1.157	2.022	1.519	0.79	0.417	0.955	1.788	2.259	1.403	1.092	0.707	1.543	1.154	1.344	0.59	1.069	1.37	1.295	0.688	0.556	0.964	0.691	1.158	1.094	0.727	1.759	0.992	0.639	1.072	1.356	1.014	0.982	0.515	1.532	1.124	1.069	0.95	0.67	1.264
Q01581	1.407	1.208	2.273	1.782	0.744	0.557	0.637	1.08	2.093	2.093	1.236	2.084	1.492	0.692	0.423	0.932	2.04	2.341	1.48	1.212	0.823	1.887	1.26	1.628	0.814	1.438	1.517	1.4	0.765	0.689	1.096	0.773	1.344	1.337	0.918	2.003	1.09	0.714	1.199	1.404	1.107	1.203	0.704	1.724	1.241	1.211	1.053	0.822	1.401
O60568	1.298	1.177	2.202	1.679	0.734	0.588	0.661	0.996	2.059	2.171	1.286	2.219	1.548	0.735	0.447	1.049	1.87	2.489	1.661	1.195	0.9	1.986	1.279	1.668	0.757	1.507	1.609	1.286	0.762	0.675	1.027	0.733	1.322	1.351	0.889	2.028	1.108	0.69	1.26	1.556	1.199	1.319	0.74	1.979	1.363	1.185	1.055	0.813	1.325
F6TLX2	1.248	1.046	1.982	1.517	0.627	0.51	0.546	0.952	1.819	2.114	1.301	2.22	1.6	0.692	0.44	0.946	1.846	2.438	1.471	1.111	0.779	1.821	1.247	1.526	0.686	1.248	1.666	1.308	0.672	0.62	1.01	0.702	1.258	1.25	0.82	1.953	1.036	0.69	1.199	1.427	1.105	1.166	0.686	1.772	1.346	1.118	1.028	0.76	1.26
P16435	1.237	1.023	2.068	1.545	0.639	0.494	0.522	0.934	1.842	2.071	1.102	1.964	1.368	0.664	0.392	0.835	1.69	2.155	1.406	1.107	0.8	1.791	1.173	1.504	0.719	1.295	1.453	1.262	0.718	0.651	1.048	0.726	1.333	1.343	0.882	1.917	0.964	0.587	1.057	1.276	0.975	1.04	0.647	1.609	1.106	1.054	0.907	0.689	1.135
P80723	1.455	1.198	2.457	1.654	0.776	0.614	0.497	0.986	1.805	4.302	1.636	2.957	1.858	1.347	0.624	1.541	1.948	2.312	2.002	1.139	0.928	2.087	1.358	1.619	0.673	1.396	1.64	1.607	0.829	0.731	1.073	0.937	1.627	1.659	0.895	1.976	1.526	1.013	1.442	2.164	1.438	1.446	0.862	2.575	1.61	1.63	1.449	1.165	1.771
A0A1W2PPT5	1.381	1.159	2.308	1.797	0.699	0.564	0.564	1.038	2.283	1.858	1.232	2.331	1.695	0.717	0.489	1.175	2.292	2.772	1.096	1.135	0.873	2.007	1.259	1.679	0.894	1.608	1.983	1.434	0.811	0.795	1.146	0.853	1.622	1.545	1.059	2.204	1.067	0.692	1.21	1.523	1.212	1.198	0.865	1.757	1.551	1.242	1.121	0.87	1.382
P52597	1.214	1.005	1.905	1.475	0.629	0.468	0.527	0.846	1.666	1.98	1.168	1.916	1.299	0.665	0.432	0.791	1.567	2.076	1.486	1.062	0.73	1.69	1.107	1.348	0.618	1.106	1.266	1.307	0.705	0.633	1	0.654	1.088	1.06	0.729	1.845	1.092	0.672	1.125	1.342	0.966	1.031	0.628	1.703	1.093	1.181	1.069	0.841	1.343
Q5JR08	1.328	1.129	2.092	1.675	0.686	0.511	0.58	0.934	1.811	2.125	1.189	1.86	1.342	0.653	0.441	0.807	1.667	2.081	1.476	1.161	0.76	1.754	1.246	1.544	0.701	1.316	1.42	1.327	0.772	0.68	0.988	0.767	1.335	1.351	0.942	1.854	1.094	0.636	1.174	1.4	1.023	1.139	0.713	1.66	1.092	1.175	1.032	0.787	1.33
Q9NVJ2	1.501	1.285	2.831	2.273	0.752	0.58	0.618	1.23	2.621	2.099	1.45	2.696	1.869	0.729	0.474	1.203	2.466	2.919	1.553	1.272	0.864	2.03	1.394	1.82	0.847	1.489	1.794	1.46	0.816	0.72	1.143	0.822	1.486	1.433	0.983	2.185	1.101	0.683	1.213	1.529	1.159	1.233	0.712	1.82	1.426	1.199	1.053	0.757	1.353
Q8WWM7	1.247	1.062	1.896	1.466	0.684	0.556	0.628	0.953	1.794	2.38	1.257	1.826	1.317	0.808	0.422	0.985	1.677	2.118	1.744	1.151	0.936	2.033	1.357	1.739	0.742	1.484	1.699	1.396	0.808	0.726	1.069	0.86	1.5	1.475	0.924	2.112	1.033	0.711	1.206	1.479	1.147	1.195	0.642	1.866	1.156	1.201	1.062	0.872	1.364
Q9NR12	1.423	1.272	2.512	2.002	0.742	0.524	0.581	0.979	2.196	2.442	1.299	2.241	1.534	0.788	0.491	0.982	1.835	2.505	1.484	1.176	0.879	2.005	1.284	1.63	0.755	1.429	1.694	1.41	0.801	0.731	1.135	0.821	1.507	1.402	0.942	2.15	1.047	0.664	1.186	1.431	1.076	1.187	0.71	1.804	1.253	1.141	1.018	0.797	1.296
P41240	1.367	1.26	2.44	1.909	0.748	0.574	0.572	1.101	2.243	2.146	1.272	2.154	1.573	0.749	0.463	1.064	1.917	2.457	1.422	1.196	0.851	1.928	1.313	1.626	0.82	1.464	1.652	1.306	0.717	0.658	1.026	0.758	1.346	1.332	0.893	2.021	1.1	0.719	1.242	1.539	1.237	1.219	0.785	1.854	1.354	1.199	1.095	0.834	1.355
P04792	1.451	1.143	2.379	1.702	0.66	0.511	0.576	0.929	1.812	2.721	1.583	2.746	1.818	0.957	0.546	1.198	1.979	2.738	2.067	1.331	0.967	2.044	1.311	1.756	0.726	1.507	1.618	1.662	0.809	0.834	1.137	0.856	1.505	1.404	0.946	2.28	1.358	0.818	1.398	1.662	1.299	1.341	0.772	2.125	1.435	1.224	1.061	0.932	1.382
Q9HCC0	1.41	1.167	2.276	1.721	0.779	0.589	0.557	0.999	2.108	1.766	1.298	2.185	1.573	0.635	0.439	1.068	1.976	2.492	1.412	1.127	0.817	1.835	1.207	1.549	0.723	1.338	1.473	1.413	0.798	0.677	1.043	0.792	1.454	1.389	0.906	2.066	1.094	0.704	1.218	1.517	1.182	1.284	0.763	1.903	1.293	1.095	1.034	0.752	1.21
P60953	1.257	1.12	2.156	1.66	0.606	0.461	0.456	0.959	1.87	1.952	1.23	2.288	1.568	0.639	0.378	0.949	1.87	2.409	1.386	1.143	0.8	1.81	1.21	1.514	0.684	1.295	1.494	1.409	0.782	0.691	1.083	0.815	1.426	1.352	0.916	1.985	1.094	0.689	1.166	1.492	1.112	1.155	0.664	1.655	1.249	1.141	1.044	0.758	1.239
P26368	1.27	1.073	2.035	1.629	0.64	0.481	0.519	0.907	1.802	1.994	1.226	2.197	1.462	0.649	0.397	0.996	1.949	2.386	1.444	1.084	0.769	1.753	1.115	1.419	0.656	1.267	1.323	1.285	0.756	0.657	1.027	0.703	1.252	1.2	0.826	1.913	1.12	0.721	1.26	1.532	1.191	1.197	0.754	1.738	1.252	1.174	1.063	0.827	1.332
Q5JTZ9	1.334	1.213	2.204	1.723	0.714	0.609	0.622	1.054	2.096	1.997	1.167	2.051	1.523	0.711	0.474	0.991	1.926	2.281	1.52	1.159	0.837	1.769	1.236	1.581	0.807	1.532	1.608	1.451	0.766	0.718	1.079	0.811	1.57	1.457	0.949	2.1	0.948	0.661	1.186	1.418	1.142	1.201	0.723	1.937	1.189	1.185	1.102	0.892	1.372
P61163	1.395	1.17	2.323	1.78	0.746	0.613	0.702	1.043	2.15	2.723	1.37	2.264	1.613	0.945	0.536	1.242	2.092	2.609	1.756	1.191	0.896	2.01	1.287	1.682	0.766	1.41	1.628	1.44	0.815	0.717	1.148	0.826	1.532	1.453	0.977	2.232	1.09	0.706	1.265	1.627	1.209	1.259	0.709	2.021	1.385	1.249	1.09	0.798	1.396
H0YDU8	1.261	1.072	1.945	1.543	0.654	0.53	0.535	1.047	1.765	1.894	1.164	1.932	1.388	0.668	0.416	0.976	1.841	2.157	1.506	1.15	0.803	1.761	1.258	1.557	0.727	1.336	1.45	1.289	0.74	0.642	1.056	0.722	1.3	1.255	0.795	1.922	1.023	0.667	1.15	1.433	1.077	1.139	0.674	1.646	1.25	1.119	1.007	0.757	1.26
Q01432	1.314	1.119	2.176	1.729	0.68	0.587	0.617	1.031	2.096	2.087	1.433	2.485	1.644	0.754	0.508	0.98	2.112	2.73	1.385	1.101	0.749	1.724	1.201	1.442	0.73	1.28	1.415	1.328	0.669	0.65	1.046	0.718	1.225	1.153	0.787	1.919	1.13	0.728	1.232	1.525	1.157	1.203	0.715	1.826	1.311	1.231	1.118	0.807	1.375
Q14699	1.31	0.957	1.757	1.405	0.631	0.526	0.589	0.955	1.696	2.518	1.061	1.709	1.235	0.768	0.418	0.897	1.544	2.036	1.543	1.102	0.813	1.827	1.176	1.48	0.657	1.243	1.401	1.335	0.76	0.684	1.071	0.757	1.284	1.29	0.87	1.901	1.204	0.777	1.369	1.607	1.273	1.375	0.803	2.085	1.312	1.359	1.176	0.944	1.538
Q15042	1.373	1.258	2.315	1.766	0.787	0.628	0.631	1.005	2.128	2.367	1.276	1.976	1.341	0.805	0.483	1.005	1.781	2.313	1.523	1.152	0.865	1.95	1.315	1.572	0.819	1.456	1.554	1.319	0.76	0.712	1.046	0.81	1.325	1.359	0.937	2.068	1.025	0.68	1.202	1.398	1.141	1.231	0.694	1.75	1.225	1.192	1.048	0.831	1.375
Q7Z2K6	1.406	1.222	2.359	1.818	0.741	0.6	0.608	1.092	2.198	1.899	1.26	2.248	1.614	0.682	0.476	1.066	1.991	2.502	1.274	1.201	0.826	1.856	1.326	1.647	0.844	1.45	1.575	1.286	0.682	0.64	0.989	0.705	1.278	1.266	0.848	1.868	1.065	0.646	1.147	1.352	1.056	1.205	0.637	1.672	1.103	1.097	1.033	0.73	1.177
P40763	1.296	1.175	2.37	1.835	0.714	0.544	0.57	0.96	2.175	1.968	1.462	2.484	1.791	0.708	0.459	1.175	2.177	2.884	1.365	1.082	0.803	1.691	1.265	1.526	0.768	1.287	1.513	1.377	0.773	0.669	1.091	0.762	1.422	1.355	0.873	2.127	1.07	0.66	1.152	1.394	1.056	1.126	0.663	1.672	1.226	1.132	1.025	0.707	1.217
B0I1T2	1.407	1.218	2.36	1.792	0.783	0.652	0.709	1.072	2.178	2.263	1.33	2.302	1.637	0.797	0.513	1.124	2.206	2.662	1.552	1.301	0.946	1.94	1.457	1.779	0.821	1.514	1.941	1.435	0.797	0.739	1.176	0.904	1.482	1.452	0.995	2.195	1.045	0.656	1.24	1.483	1.143	1.228	0.705	1.828	1.255	1.191	1.062	0.812	1.331
Q9NTX5	1.261	1.099	2.215	1.71	0.656	0.482	0.537	0.969	1.97	2.066	1.308	2.315	1.593	0.738	0.46	1.044	1.943	2.406	1.411	1.148	0.787	1.751	1.225	1.549	0.726	1.335	1.491	1.327	0.695	0.659	1.067	0.731	1.252	1.162	0.827	1.991	1.018	0.627	1.061	1.377	0.984	0.993	0.572	1.557	1.232	1.065	0.964	0.742	1.214
P39748	1.378	1.147	2.203	1.691	0.67	0.539	0.592	1.102	2.094	2.326	1.263	2.168	1.548	0.819	0.509	1.123	1.95	2.431	1.555	1.212	0.851	1.91	1.3	1.628	0.745	1.399	1.647	1.421	0.83	0.697	1.125	0.802	1.468	1.478	0.972	2.077	1.079	0.685	1.222	1.53	1.13	1.185	0.657	1.894	1.306	1.179	1.061	0.793	1.36
P62241	1.38	1.198	2.492	1.935	0.699	0.546	0.647	1.038	2.229	2.2	1.382	2.513	1.718	0.815	0.479	1.141	2.116	2.74	1.575	1.211	0.814	1.961	1.324	1.624	0.733	1.4	1.596	1.447	0.831	0.738	1.145	0.793	1.433	1.388	0.919	2.183	1.067	0.661	1.191	1.441	1.092	1.125	0.659	1.683	1.21	1.175	1.048	0.783	1.327
P10155	1.317	1.161	2.229	1.754	0.677	0.455	0.478	0.935	1.93	1.998	1.314	2.316	1.605	0.733	0.467	1.086	2.033	2.555	1.303	1.147	0.778	1.855	1.342	1.611	0.77	1.33	1.501	1.313	0.733	0.671	1.09	0.781	1.305	1.292	0.868	1.974	1.013	0.652	1.204	1.475	1.14	1.231	0.715	1.772	1.31	1.152	1.028	0.799	1.327
Q9BS26	1.288	1.157	2.196	1.652	0.701	0.538	0.577	0.985	1.984	2.144	1.272	2.173	1.539	0.732	0.443	1.065	1.953	2.366	1.558	1.145	0.833	1.821	1.242	1.569	0.706	1.286	1.59	1.363	0.788	0.719	1.075	0.799	1.414	1.318	0.883	2.012	1.059	0.686	1.173	1.454	1.14	1.173	0.677	1.695	1.204	1.147	1.03	0.779	1.278
Q15435	1.37	1.174	2.206	1.69	0.646	0.535	0.574	1.024	2.037	1.956	1.32	2.344	1.669	0.708	0.481	1.083	2.039	2.617	1.352	1.173	0.821	1.85	1.275	1.599	0.744	1.319	1.564	1.34	0.716	0.682	1.1	0.77	1.256	1.193	0.832	1.928	1.003	0.707	1.172	1.61	1.155	1.167	0.662	1.706	1.267	1.119	1.044	0.769	1.251
Q8NE71	1.325	1.111	2.101	1.622	0.679	0.59	0.659	1.043	1.979	2.559	1.227	1.941	1.327	0.827	0.473	1.003	1.821	2.222	1.758	1.203	0.842	1.969	1.231	1.59	0.747	1.452	1.499	1.38	0.749	0.711	1.142	0.78	1.57	1.483	0.988	2.184	1.177	0.777	1.373	1.641	1.223	1.407	0.758	2.159	1.356	1.186	1.001	0.782	1.337
P04632	1.399	1.198	2.479	1.929	0.666	0.522	0.617	1.159	2.254	2.027	1.325	2.4	1.662	0.754	0.495	1.105	2.105	2.643	1.612	1.298	0.861	1.945	1.38	1.679	0.803	1.399	1.698	1.455	0.791	0.698	1.17	0.81	1.436	1.354	0.916	2.264	1.098	0.665	1.181	1.541	1.114	1.12	0.634	1.756	1.31	1.236	1.144	0.786	1.439
Q9NYL9	1.401	1.175	2.36	1.704	0.719	0.572	0.63	0.999	2.012	2.469	1.171	2.042	1.513	0.845	0.499	1.027	1.628	2.123	1.597	1.213	0.881	1.754	1.295	1.586	0.743	1.334	1.48	1.433	0.778	0.684	1.013	0.859	1.392	1.362	0.903	1.983	1.05	0.66	1.096	1.293	1.007	1.082	0.594	1.695	1.139	1.095	1.009	0.757	1.186
Q13547	1.195	0.926	1.837	1.476	0.532	0.439	0.518	1.053	1.733	2.252	1.152	1.935	1.331	0.734	0.412	0.915	1.741	2.107	1.548	1.144	0.813	1.927	1.281	1.62	0.709	1.358	1.596	1.307	0.778	0.661	1.099	0.765	1.392	1.277	0.883	1.96	1.073	0.675	1.193	1.503	1.124	1.138	0.69	1.73	1.276	1.202	1.042	0.8	1.363
P51532	1.382	1.107	2.202	1.746	0.734	0.591	0.614	1.056	2.139	2.111	1.211	1.972	1.426	0.711	0.496	0.937	1.738	2.356	1.739	1.203	0.922	1.929	1.188	1.685	0.781	1.421	1.506	1.352	0.819	0.744	1.158	0.856	1.531	1.488	0.963	2.221	1.023	0.671	1.234	1.454	1.109	1.335	0.756	1.888	1.362	1.156	1.045	0.856	1.348
P62714	1.376	1.231	2.245	1.802	0.742	0.637	0.654	1.123	2.181	2.185	1.259	1.99	1.534	0.782	0.48	1.106	1.87	2.294	1.474	1.262	0.878	1.924	1.367	1.657	0.772	1.426	1.746	1.24	0.752	0.634	0.973	0.78	1.331	1.269	0.873	1.867	1.06	0.69	1.201	1.517	1.125	1.172	0.666	1.791	1.287	1.14	1.069	0.851	1.402
Q9UMR2																			1.429	1.226	0.81	1.865	1.319	1.434	0.835	1.173	1.335	1.398	1.081	0.864	0.986	0.9	1.495	1.722	1.176	2.244	1.138	0.56	1.161	1.335	1.025	1.115	0.68	1.365	1.043	1.161	1.317	0.94	1.655
Q5JTH9	1.328	1.125	2.285	1.699	0.727	0.543	0.527	1	2.167	1.871	1.193	1.944	1.465	0.617	0.432	0.971	1.757	2.284	1.127	1.158	0.815	1.729	1.243	1.549	0.829	1.421	1.614	1.327	0.769	0.688	1.117	0.834	1.413	1.385	0.931	1.993	1.032	0.62	1.15	1.397	1.076	1.164	0.698	1.632	1.303	1.103	1.012	0.757	1.289
B4DDD6	1.291	1.124	1.335	1.05	0.85	0.759	0.631	0.925	1.539	2.99	1.244	1.61	1.241	0.891	0.552	0.996	1.297	1.845	2.071	1.217	0.897	2.638	1.433	1.792	0.751	1.624	1.454																			1.311	1.149	0.749	1.4
P20290	1.287	1.06	1.685	1.318	0.653	0.518	0.572	0.84	1.495	2.092	1.144	1.608	1.206	0.695	0.398	0.8	1.536	1.825	1.455	1.175	0.807	1.683	1.141	1.415	0.651	1.122	1.287	1.36	0.719	0.627	0.997	0.734	1.263	1.218	0.774	1.797	1.016	0.708	1.17	1.291	1.033	1.067	0.573	1.679	1.051	1.164	1.121	0.806	1.338
P61289	1.336	1.12	2.045	1.6	0.66	0.493	0.582	0.952	1.763	2.296	1.281	2.175	1.608	0.781	0.433	1.028	1.893	2.392	1.345	1.132	0.779	1.686	1.218	1.421	0.678	1.211	1.433	1.433	0.783	0.671	1.129	0.816	1.293	1.279	0.838	1.981	1.15	0.693	1.16	1.536	1.146	1.09	0.651	1.707	1.302	1.255	1.116	0.794	1.422
P24844	1.34	1.05	2.235	1.616	0.712	0.548	0.547	1.035	2.076	2.431	1.569	3.006	1.784	0.918	0.743	0.905	2.588	3.356	1.477	1.174	0.872	1.875	1.272	1.916	0.681	1.41	1.758	1.579	0.793	0.754	1.23	0.836	1.541	1.425	1.117	2.374
H0Y5F3																																														1.219	1.093	0.835	1.376
A0A0A0MT60	1.201	1.049	1.962	1.497	0.733	0.593	0.692	1.011	1.83	2.363	1.106	1.861	1.296	0.825	0.411	0.977	1.787	2.202	1.299	1.188	0.789	1.793	1.256	1.592	0.805	1.548	1.502	1.249	0.791	0.686	1.066	0.825	1.436	1.4	0.946	1.979	1.116	0.754	1.253	1.524	1.202	1.234	0.829	1.821	1.402	1.096	1.067	0.833	1.323
P28066	1.218	0.961	1.885	1.453	0.549	0.425	0.498	1.016	1.69	2.127	1.182	2.175	1.626	0.741	0.433	1.03	1.823	2.353	1.474	1.188	0.781	1.816	1.258	1.581	0.706	1.289	1.51	1.347	0.751	0.639	1.089	0.756	1.364	1.26	0.813	1.991	1.018	0.667	1.118	1.428	1.045	1.043	0.586	1.635	1.242	1.145	1.054	0.724	1.306
O95433	1.268	1.035	2.075	1.628	0.629	0.513	0.581	1.015	1.917	2.224	1.239	2.071	1.484	0.776	0.473	1.016	1.832	2.307	1.593	1.135	0.782	1.815	1.226	1.524	0.681	1.249	1.464	1.271	0.721	0.638	1.028	0.75	1.231	1.199	0.779	1.838	1.101	0.724	1.204	1.577	1.165	1.229	0.713	1.947	1.347	1.192	1.06	0.811	1.343
Q15404	1.305	1.207	2.17	1.639	0.67	0.531	0.58	1.044	1.933	1.992	1.142	1.955	1.472	0.718	0.43	1.063	1.755	2.103	1.406	1.173	0.781	1.688	1.21	1.45	0.707	1.171	1.335	1.408	0.764	0.675	1.085	0.82	1.4	1.456	0.919	2.037	1.041	0.674	1.11	1.46	1.041	1.01	0.582	1.619	1.209	1.148	1.105	0.706	1.341
Q86XP3	1.285	1.113	2.268	1.774	0.709	0.506	0.539	1.01	2.103	2.013	1.284	2.259	1.613	0.722	0.461	1.179	2.051	2.594	1.546	1.159	0.91	2.019	1.327	1.783	0.769	1.483	1.689	1.272	0.783	0.709	1.079	0.823	1.42	1.39	0.93	1.98	1.135	0.699	1.308	1.595	1.199	1.355	0.764	2.047	1.4	1.21	1.088	0.91	1.447
Q96CS3	1.255	1.184	2.186	1.767	0.764	0.615	0.655	0.984	2.155	2.282	1.167	1.848	1.306	0.725	0.454	1.053	1.623	2.377	1.4	1.083	0.811	1.808	1.21	1.539	0.757	1.32	1.452	1.333	0.76	0.666	1.125	0.82	1.401	1.426	0.947	2.064	1.013	0.712	1.212	1.437	1.122	1.209	0.685	1.713	1.301	1.181	1.065	0.784	1.354
Q13085	1.229	1.091	2.157	1.651	0.596	0.526	0.409	0.987	2.081	1.607	1.144	2.171	1.446	0.579	0.392	0.867	1.842	2.239	1.13	1.032	0.829	1.812	1.253	1.887	1.004	1.647	1.746	1.194	0.695	0.654	0.889	0.785	1.209	1.321	0.907	1.738	1.11	0.683	1.161	1.352	1.205	1.202	0.698	1.593	1.352	1.056	0.901	0.741	1.186
P46926	1.256	1.158	2.336	1.688	0.602	0.487	0.491	0.976	2.016	1.896	1.324	2.467	1.737	0.705	0.472	1.029	2.072	2.745	1.183	1.15	0.803	1.752	1.263	1.582	0.78	1.366	1.507	1.334	0.716	0.644	1.027	0.722	1.249	1.242	0.825	1.912	0.979	0.679	1.081	1.281	0.975	1.068	0.637	1.573	1.152	1.117	1.012	0.736	1.276
P19623	1.378	1.214	2.25	1.749	0.745	0.562	0.676	1.04	2.091	1.729	1.331	2.307	1.619	0.604	0.398	1.169	2.209	2.516	1.372	1.206	0.841	2	1.379	1.719	0.769	1.49	1.659	1.303	0.735	0.669	1.124	0.763	1.357	1.307	0.899	1.941	0.969	0.69	1.12	1.384	1.077	1.068	0.653	1.531	1.217	1.119	0.998	0.773	1.258
Q53GQ0	1.225	1.099	2.093	1.615	0.638	0.455	0.663	0.849	2.132	2.157	1.23	2.118	1.433	0.717	0.432	1.053	1.667	2.633	1.373	1.181	0.794	1.784	1.199	1.444	0.793	1.236	1.597	1.273	0.758	0.705	1.063	0.748	1.242	1.359	0.812	2.093	1.006	0.681	1.097	1.356	1.047	1.022	0.68	1.574	1.189	1.095	0.964	0.714	1.173
P36871	1.376	1.184	2.335	1.736	0.725	0.589	0.667	1.136	2.03	2.435	1.342	2.159	1.583	0.859	0.55	1.07	1.898	2.437	1.807	1.328	0.96	2.129	1.426	1.926	0.803	1.607	1.823	1.429	0.839	0.783	1.178	0.872	1.524	1.452	1.03	2.236	1.121	0.76	1.33	1.55	1.236	1.417	0.811	2.092	1.348	1.213	1.114	0.873	1.378
A5A3E0	1.003	1.28	2.238	1.755	0.597	0.463	0.702	1.049	1.838	4.691	0.639	0.767	0.556	0.832	0.514	0.74	0.779	1.546	1.946	1.272	1.184	2.173	1.402	1.632	0.669	1.49	1.241	1.15	0.751	0.675	1.204	0.678	1.147	1.365	0.739	1.721	0.65	0.414	0.911	0.927	0.761	0.649	0.51	1.543	0.646	0.583	0.484	0.329	0.636
Q13155	1.362	1.14	2.226	1.745	0.652	0.576	0.522	1.028	2.042	1.741	1.229	2.119	1.584	0.647	0.539	0.912	1.849	2.352	1.465	1.218	0.834	1.829	1.213	1.577	0.801	1.35	1.564	1.358	0.773	0.728	1.064	0.78	1.361	1.333	0.863	1.995	1.1	0.677	1.144	1.395	1.092	1.07	0.719	1.695	1.21	1.146	1.055	0.789	1.355
Q8TD55	1.327	1.114	2.143	1.589	0.694	0.548	0.625	0.983	1.98	2.254	1.164	1.893	1.469	0.77	0.48	0.988	1.641	2.337	1.484	1.102	0.793	1.676	1.19	1.444	0.68	1.225	1.461	1.286	0.746	0.637	1.014	0.748	1.326	1.316	0.837	1.957	0.996	0.68	1.155	1.367	1.069	1.09	0.633	1.755	1.196	1.067	1.014	0.726	1.25
Q9UNZ2	1.238	1.053	1.837	1.427	0.638	0.592	0.67	0.981	1.755	2.536	1.182	1.782	1.314	0.824	0.495	1.052	1.609	2.096	1.587	1.127	0.89	1.773	1.153	1.546	0.703	1.379	1.498	1.306	0.776	0.676	1.09	0.825	1.503	1.435	0.994	2.019	1.053	0.701	1.216	1.443	1.119	1.356	0.694	2.071	1.271	1.109	1.075	0.799	1.292
I3L3Q4	1.423	1.28	2.429	1.912	0.837	0.555	0.82	0.752	1.846	2.845	1.15	1.599	1.183	0.748	0.786	0.663	1.342	1.83	2.14	1.163	0.85	2.113	0.94	1.393	0.833	1.212	1.053	1.399	0.692	0.639	0.981	0.675	1.129	1.065	0.746	1.664										1.089	1.124	0.737	1.312
M0R0F0	1.341	1.196	2.489	1.871	0.715	0.508	0.499	1.088	1.966	1.895	1.298	2.316	1.642	0.67	0.42	1.177	1.988	2.215	1.304	1.126	0.827	1.757	1.312	1.574	0.75	1.389	1.395	1.353	0.76	0.729	1.045	0.879	1.418	1.386	0.919	1.945	1.168	0.793	1.284	1.731	1.27	1.253	0.743	1.896	1.346	1.303	1.206	0.826	1.464
O15355	1.358	1.147	1.95	1.452	0.752	0.652	0.679	1.007	1.858	2.571	1.243	1.988	1.42	0.849	0.488	1.051	1.743	2.241	1.571	1.187	0.885	1.988	1.283	1.587	0.692	1.368	1.537	1.441	0.808	0.714	1.199	0.822	1.602	1.522	1.014	2.162	1.091	0.714	1.302	1.572	1.188	1.291	0.719	2.108	1.316	1.192	1.059	0.807	1.415
Q04760	1.349	1.149	2.277	1.82	0.671	0.472	0.585	0.947	2.017	1.929	1.418	2.544	1.745	0.658	0.448	1.165	2.239	2.674	1.601	1.308	0.818	1.936	1.38	1.721	0.796	1.349	1.609	1.592	0.822	0.717	1.206	0.826	1.453	1.4	0.929	2.157	1.165	0.727	1.211	1.531	1.118	1.105	0.595	1.631	1.302	1.259	1.132	0.772	1.41
Q14166	1.35	1.212	2.243	1.772	0.731	0.569	0.622	0.958	2.101	2.275	1.145	1.858	1.387	0.74	0.418	1.023	1.715	2.161	1.582	1.179	0.839	1.881	1.275	1.641	0.74	1.369	1.312	1.313	0.781	0.681	1.11	0.765	1.386	1.368	0.918	1.993	1.093	0.709	1.236	1.565	1.18	1.232	0.714	1.855	1.204	1.168	1.024	0.76	1.322
Q9BYT8	1.349	1.184	2.333	1.8	0.717	0.508	0.522	1.032	2.075	2.271	1.291	2.31	1.564	0.775	0.442	1.04	1.896	2.523	1.301	1.294	0.876	1.822	1.322	1.668	0.905	1.43	1.505	1.307	0.785	0.666	1.099	0.82	1.341	1.385	0.897	2.065	1.059	0.7	1.164	1.504	1.134	1.136	0.697	1.749	1.304	1.197	1.074	0.832	1.322
Q9Y295	1.347	1.075	2.055	1.624	0.651	0.464	0.522	0.865	1.811	2.196	1.245	2.241	1.622	0.829	0.472	1.006	1.785	2.361	1.351	1.114	0.783	1.785	1.202	1.524	0.714	1.25	1.477	1.262	0.701	0.643	1	0.736	1.241	1.184	0.782	1.855	1.056	0.671	1.172	1.439	1.091	1.164	0.707	1.696	1.233	1.117	1.021	0.792	1.234
O43615	1.298	0.998	1.859	1.392	0.643	0.511	0.654	0.847	1.701	2.122	1.17	1.981	1.438	0.782	0.449	0.905	1.673	2.221	1.627	1.111	0.812	1.778	1.163	1.523	0.668	1.265	1.434	1.311	0.673	0.632	0.964	0.702	1.295	1.187	0.793	1.925	1.009	0.656	1.157	1.372	1.049	1.269	0.707	1.9	1.275	1.14	1.043	0.829	1.295
Q6XQN6	1.341	1.12	2.925	2.183	0.681	0.546	0.531	1.08	2.693	2.022	1.216	2.235	1.46	0.777	0.484	1.018	2.017	2.609	1.397	1.193	0.901	1.908	1.275	1.652	0.788	1.416	1.692	1.357	0.792	0.754	1.141	0.874	1.593	1.472	1.008	2.292	1.115	0.691	1.186	1.417	1.059	1.189	0.69	2.033	1.377	1.142	0.977	0.791	1.263
P09467	1.444	1.266	2.314	1.737	0.81	0.621	0.661	1.077	2.007	3.009	1.463	2.336	1.748	1.046	0.637	1.08	2.077	2.652	1.825	1.408	0.964	1.891	1.508	1.676	0.797	1.499	1.606	1.748	0.945	0.882	1.369	0.942	1.585	1.575	1.117	2.483	1.238	0.781	1.345	1.63	1.293	1.412	0.825	1.88	1.477	1.347	1.205	0.937	1.509
Q13107	1.438	1.289	2.507	1.961	0.711	0.537	0.647	0.946	2.139	2.36	1.243	2.034	1.493	0.76	0.466	1.092	1.873	2.223	1.567	1.272	0.843	1.977	1.374	1.623	0.781	1.416	1.476	1.392	0.747	0.712	1.155	0.776	1.362	1.345	0.93	2.075	1.073	0.675	1.215	1.443	1.11	1.212	0.739	1.795	1.231	1.218	1.099	0.792	1.356
Q8WXF1	1.298	1.074	2.166	1.667	0.636	0.533	0.527	0.944	1.945	2.355	1.156	1.962	1.319	0.733	0.432	0.966	1.795	2.215	1.278	1.073	0.775	1.873	1.237	1.503	0.76	1.464	1.507	1.266	0.79	0.677	1.003	0.775	1.342	1.307	0.924	1.831	1.163	0.654	1.293	1.505	1.162	1.354	0.807	1.849	1.241	1.246	1.076	0.867	1.505
P10515	1.32	1.074	2.114	1.758	0.675	0.525	0.549	1	2.051	1.678	1.243	2.052	1.484	0.647	0.477	0.959	1.712	2.316	1.354	1.178	0.772	1.755	1.258	1.558	0.775	1.336	1.477	1.424	0.819	0.768	1.128	0.808	1.358	1.333	0.997	2.064	1.039	0.676	1.065	1.341	1.029	1.047	0.708	1.54	1.137	1.16	1.026	0.794	1.266
O00442	1.383	1.161	2.361	1.827	0.717	0.558	0.591	1.042	2.143	1.884	1.342	2.314	1.692	0.663	0.457	0.933	1.855	2.525	1.223	1.182	0.837	1.896	1.314	1.596	0.846	1.461	1.567	1.244	0.718	0.65	0.98	0.719	1.223	1.242	0.81	1.747	0.992	0.623	1.142	1.406	1.09	1.08	0.649	1.663	1.116	1.116	1.002	0.744	1.267
P18031	1.346	1.048	1.807	1.457	0.656	0.49	0.566	1.135	1.841	2.576	1.314	2.037	1.458	0.848	0.453	1.025	2.099	2.368	1.578	1.296	0.925	2.243	1.417	1.775	0.855	1.516	1.775	1.441	0.827	0.73	1.192	0.812	1.443	1.371	0.921	2.211	1.161	0.709	1.299	1.677	1.245	1.358	0.727	2.131	1.383	1.313	1.161	0.929	1.51
Q9NQC3	1.272	1.09	1.968	1.572	0.611	0.483	0.48	0.98	1.762	1.932	1.182	1.884	1.364	0.662	0.417	0.985	1.843	2.051	1.34	1.15	0.868	1.86	1.282	1.596	0.777	1.538	1.623	1.251	0.719	0.653	0.985	0.754	1.344	1.252	0.915	1.856	1.049	0.631	1.18	1.492	1.086	1.191	0.67	1.79	1.324	1.167	1.059	0.79	1.339
Q03518	1.324	1.146	2.165	1.688	0.696	0.543	0.642	0.987	2.006	2.312	1.22	2.047	1.438	0.763	0.454	1.035	1.84	2.318	1.598	1.234	0.889	1.968	1.31	1.589	0.806	1.392	1.62	1.412	0.837	0.719	1.138	0.802	1.437	1.438	0.919	2.151	1.161	0.742	1.29	1.532	1.156	1.264	0.724	2.047	1.333	1.217	1.115	0.813	1.337
P37235	1.756	1.469	3.241	1.999	0.777	0.686	0.752	1.594	2.573	3.319	1.513	2.853	1.896	1.007	0.533	1.716	2.618	2.985	1.924	1.388	1.001	2.331	1.556	1.801	0.775	1.566	1.691	1.556	0.906	0.766	1.238	0.897	1.566	1.442	0.956	2.341	1.805	1.166	1.592	2.503	1.787	1.697	1.008	2.807	1.838	1.738	1.384	1.041	1.892
Q8WUM0	1.257	1.126	2.328	1.8	0.696	0.558	0.55	1.062	2.111	2.323	1.221	2.101	1.466	0.777	0.462	0.995	1.827	2.274	1.644	1.157	0.846	1.892	1.244	1.527	0.717	1.286	1.547	1.315	0.757	0.719	1.049	0.72	1.301	1.274	0.931	1.986	1.188	0.793	1.157	1.375	1.126	1.204	0.714	1.626	1.271	1.131	1.022	0.8	1.242
O14929	1.271	1.11	2.322	1.824	0.641	0.484	0.52	1.04	2.084	1.944	1.24	2.111	1.507	0.664	0.408	0.952	1.891	2.335	1.4	1.208	0.801	1.755	1.284	1.567	0.725	1.319	1.49	1.297	0.75	0.658	1.042	0.744	1.289	1.241	0.847	1.961	1.071	0.725	1.21	1.476	1.125	1.176	0.69	1.698	1.243	1.165	1.085	0.83	1.336
P05387	1.574	1.309	2.852	2.006	0.688	0.605	0.652	1.041	2.179	2.564	1.512	2.667	1.944	0.967	0.506	1.324	2.104	2.698	1.966	1.368	0.89	1.888	1.382	1.786	0.805	1.393	1.534	1.792	0.902	0.845	1.277	1.01	1.759	1.801	0.956	2.45	1.269	0.787	1.328	1.536	1.263	1.138	0.634	1.868	1.403	1.29	1.172	0.932	1.415
P36542	1.317	1.072	1.92	1.521	0.671	0.486	0.579	0.814	1.693	1.9	1.11	1.804	1.285	0.638	0.4	0.858	1.532	2.017	1.525	1.179	0.77	1.781	1.218	1.473	0.681	1.194	1.397	1.357	0.744	0.676	1.083	0.727	1.266	1.206	0.794	1.928	1.071	0.645	1.182	1.464	1.086	1.205	0.685	1.706	1.215	1.173	1.039	0.767	1.259
Q9Y6Y8	1.373	1.208	2.474	1.94	0.704	0.566	0.581	1.177	2.232	2.5	1.239	2.191	1.47	0.809	0.504	1.124	2.015	2.335	1.592	1.209	0.865	1.929	1.274	1.581	0.763	1.393	1.578	1.382	0.79	0.695	1.147	0.8	1.497	1.388	0.965	2.105	1.068	0.693	1.223	1.514	1.152	1.275	0.696	1.974	1.322	1.176	1.025	0.771	1.297
Q14498	1.273	1.004	1.815	1.38	0.631	0.479	0.53	0.755	1.704	2.019	1.068	1.72	1.212	0.609	0.411	0.738	1.421	1.957	1.461	1.174	0.805	1.822	1.211	1.54	0.731	1.331	1.449	1.262	0.718	0.665	1.003	0.718	1.233	1.206	0.811	1.858	1.09	0.672	1.208	1.476	1.145	1.187	0.73	1.781	1.201	1.199	1.119	0.836	1.339
A0A1W2PNX8	1.315	1.203	2.364	1.881	0.724	0.56	0.487	1.127	2.166	2.435	1.323	2.17	1.615	0.828	0.474	1.046	2.101	2.404	1.208	1.133	0.796	1.57	1.246	1.612	0.902	1.325	1.567	1.405	0.801	0.704	1.047	0.797	1.39	1.321	0.965	2.003	1.126	0.722	1.257	1.519	1.258	1.234	0.696	1.946	1.388	1.19	1.082	0.829	1.39
B5MDF5	1.327	1.153	2.24	1.783	0.705	0.536	0.641	0.859	2.008	2.062	1.184	2.126	1.449	0.648	0.39	0.973	1.963	2.402	1.604	1.21	0.811	2.007	1.269	1.645	0.749	1.42	1.417	1.433	0.768	0.669	1.138	0.737	1.376	1.345	0.882	2.048	1.106	0.663	1.186	1.43	1.061	1.177	0.67	1.798	1.232	1.138	1.018	0.735	1.265
A7XZE4																																														1.437	1.348	0.969	1.593
P27694	1.3	1.104	2.055	1.625	0.738	0.59	0.689	0.947	1.871	2.318	1.134	1.845	1.274	0.755	0.449	0.981	1.691	2.024	1.644	1.148	0.868	1.919	1.205	1.567	0.68	1.288	1.382	1.374	0.806	0.712	1.117	0.818	1.425	1.432	0.903	2.018	1.094	0.738	1.255	1.602	1.177	1.273	0.746	1.996	1.372	1.125	0.97	0.792	1.37
P55036	1.345	1.211	2.4	1.883	0.73	0.564	0.586	1.05	2.158	2.325	1.311	2.241	1.558	0.798	0.487	1.045	2.054	2.393	1.473	1.215	0.872	1.913	1.261	1.582	0.76	1.389	1.678	1.33	0.798	0.702	1.104	0.802	1.488	1.42	0.942	2.058	1.069	0.716	1.215	1.476	1.199	1.29	0.737	1.79	1.329	1.097	0.998	0.755	1.29
Q15075	1.142	1.024	1.786	1.368	0.635	0.495	0.504	0.839	1.868	2.043	1.148	1.819	1.277	0.71	0.464	0.881	1.731	2.001	1.211	1.343	0.926	2.074	1.5	1.894	0.836	1.723	1.921	1.309	0.836	0.694	1.143	0.855	1.542	1.501	1.039	2.204	1.173	0.748	1.289	1.604	1.22	1.399	0.818	1.812	1.616	1.124	1.082	0.775	1.229
Q29RF7	1.381	1.122	2.003	1.512	0.654	0.545	0.562	0.983	1.804	1.969	1.192	1.997	1.411	0.677	0.437	0.903	1.684	2.098	1.321	1.191	0.81	1.746	1.259	1.546	0.827	1.32	1.39	1.338	0.781	0.704	1.108	0.817	1.345	1.345	0.941	1.983	1.122	0.707	1.23	1.456	1.067	1.169	0.693	1.769	1.302	1.154	1.059	0.813	1.267
O43399	1.547	1.185	2.458	1.805	0.592	0.503	0.623	0.987	1.986	2.771	1.416	2.627	1.826	0.932	0.485	1.06	2.017	2.78	1.715	1.214	0.864	1.847	1.203	1.577	0.697	1.319	1.751	1.59	0.795	0.768	1.143	0.848	1.475	1.318	0.895	2.306	1.235	0.764	1.164	1.539	1.179	1.147	0.62	1.907	1.333	1.315	1.155	0.847	1.467
Q15020	1.224	1.019	1.939	1.523	0.603	0.526	0.563	0.977	1.871	2.233	1.202	2.03	1.41	0.742	0.478	1.005	1.959	2.254	1.512	1.114	0.789	1.777	1.169	1.471	0.68	1.307	1.526	1.308	0.762	0.69	1.067	0.766	1.318	1.272	0.87	1.995	1.068	0.677	1.235	1.486	1.101	1.204	0.686	1.824	1.238	1.066	0.943	0.712	1.204
P52294	1.303	1.227	2.321	1.821	0.669	0.541	0.565	1.038	2.125	1.875	1.248	2.233	1.503	0.68	0.43	1.032	2.075	2.471	1.509	1.154	0.802	1.929	1.208	1.487	0.72	1.368	1.595	1.323	0.746	0.723	1.161	0.731	1.391	1.287	0.905	2.153	1.055	0.719	1.25	1.487	1.126	1.251	0.703	1.751	1.297	1.22	1.074	0.791	1.389
O14979	1.266	1.077	2.195	1.636	0.691	0.461	0.504	0.88	1.748	2.498	1.398	2.351	1.515	0.759	0.484	0.964	1.729	2.316	1.586	1.079	0.849	1.729	1.145	1.482	0.669	1.255	1.403	1.222	0.716	0.686	0.974	0.698	1.221	1.133	0.788	1.731	1.133	0.772	1.233	1.428	1.197	1.192	0.758	1.697	1.137	1.198	1.16	0.903	1.284
F6QDS0	1.376	1.079	1.963	1.481	0.634	0.55	0.627	1.027	1.778	2.064	1.244	2.07	1.443	0.75	0.421	0.962	1.803	2.209	1.504	1.181	0.832	1.933	1.287	1.593	0.74	1.36	1.616	1.306	0.721	0.678	1.038	0.74	1.323	1.31	0.882	1.937	1.086	0.712	1.192	1.479	1.057	1.232	0.684	1.847	1.249	1.16	1.024	0.789	1.273
Q9BR76	1.309	1.116	2.183	1.708	0.69	0.508	0.6	1.016	2.085	2.406	1.239	2.048	1.395	0.776	0.489	1.092	1.828	2.257	1.554	1.255	0.845	2.105	1.391	1.776	0.813	1.536	1.703	1.373	0.76	0.662	1.103	0.776	1.444	1.344	0.864	2.164	1.161	0.708	1.224	1.592	1.159	1.205	0.713	1.965	1.353	1.208	1.05	0.754	1.371
Q70J99	1.359	1.21	2.427	1.832	0.741	0.608	0.643	1.105	2.261	2.598	1.291	2.063	1.427	0.921	0.529	1.024	1.879	2.387	1.643	1.257	0.899	1.881	1.321	1.823	0.902	1.518	2.118	1.375	0.773	0.689	1.096	0.77	1.385	1.333	0.907	2.192	1.062	0.723	1.237	1.499	1.171	1.211	0.669	1.61	1.44	1.286	1.208	0.878	1.309
Q5SSJ5	1.282	1.03	1.826	1.525	0.656	0.48	0.505	0.903	1.874	2.129	1.229	2.046	1.56	0.689	0.429	1.042	1.947	2.478	1.385	1.135	0.742	1.885	1.219	1.546	0.729	1.412	1.593	1.29	0.792	0.659	1.136	0.776	1.362	1.316	0.94	2.021	1.162	0.673	1.323	1.574	1.151	1.415	0.725	1.88	1.276	1.199	1.075	0.827	1.376
P11766	1.32	1.179	2.346	1.868	0.719	0.504	0.581	1.02	2.062	2.206	1.283	2.341	1.595	0.759	0.447	0.963	1.945	2.5	1.58	1.142	0.788	1.748	1.184	1.484	0.67	1.217	1.463	1.354	0.729	0.642	1.009	0.718	1.262	1.19	0.799	1.896	1.043	0.654	1.143	1.385	1.041	1.126	0.641	1.694	1.21	1.14	1.058	0.786	1.289
Q9ULZ3	2.055	1.494	3.133	1.596	0.756	0.575	0.72	1.278	2.229	2.459	1.116	2.606	1.971	0.745	0.421	1.635	1.71	2.001	1.754	1.14	0.891	2.33	1.533	2.058	0.844	1.724	1.465	1.809	0.99	0.728	0.957	0.896	1.777	1.991	0.997	1.874	1.367	0.824	1.033	2.053	1.025	0.995	0.743	1.632	1.483	1.328	1.344	0.854	1.382
P30044	1.24	1.156	2.057	1.571	0.625	0.525	0.572	0.971	1.803	2.197	1.278	2.233	1.737	0.863	0.487	1.18	1.952	2.342	1.322	1.122	0.695	1.454	1.197	1.361	0.66	1.023	1.204	1.323	0.752	0.656	1.098	0.786	1.28	1.287	0.861	1.964	0.927	0.638	1.103	1.373	1.027	0.974	0.607	1.524	1.21	1.071	1.031	0.691	1.194
P38159	1.351	1.059	2.036	1.463	0.687	0.558	0.628	0.953	1.791	2.508	1.242	2.054	1.441	0.745	0.469	1.092	1.715	2.145	1.614	1.126	0.812	1.724	1.112	1.541	0.732	1.337	1.428	1.376	0.781	0.687	1.098	0.755	1.306	1.363	0.92	1.961	1.043	0.691	1.181	1.372	1.086	1.208	0.649	1.841	1.199	1.26	1.169	0.875	1.392
Q15233	1.13	0.917	1.785	1.277	0.508	0.469	0.494	0.797	1.588	1.854	1.001	1.853	1.21	0.655	0.413	0.794	1.425	1.985	1.13	0.933	0.722	1.507	0.989	1.227	0.612	1.128	1.346	1.157	0.688	0.592	0.904	0.681	1.18	1.178	0.783	1.737	1.146	0.62	1.231	1.547	1.038	1.149	0.737	1.764	1.242	1.211	0.994	0.806	1.427
Q9BTT0	1.247	1.111	2.168	1.66	0.631	0.448	0.496	1.008	1.905	1.885	1.337	2.366	1.595	0.693	0.434	0.956	1.853	2.474	1.401	1.193	0.785	1.78	1.237	1.44	0.736	1.253	1.438	1.354	0.712	0.646	1.038	0.768	1.279	1.217	0.845	1.923	1.016	0.661	1.12	1.376	1.099	1.106	0.642	1.572	1.213	1.146	1.071	0.747	1.3
Q16512	1.274	1.121	2.15	1.733	0.708	0.537	0.562	0.968	2.058	1.882	1.326	2.405	1.681	0.745	0.465	1.031	2.093	2.687	1.311	1.179	0.814	1.796	1.225	1.651	0.795	1.385	1.631	1.304	0.748	0.711	1.096	0.764	1.371	1.292	0.875	2.026	1.052	0.701	1.156	1.454	1.164	1.131	0.768	1.516	1.376	1.017	0.914	0.674	1.125
F8VVM2	1.615	1.304	2.018	1.515	0.897	0.537	0.75	0.848	1.958	1.823	0.946	0.979	0.978	0.572	0.254	0.739	1.41	1.27	1.948	1.226	0.909	2.625	1.389	1.49	0.854	1.52	1.143	1.695	0.968	0.819	1.358	0.856	1.397	1.699	1.015	1.97	1.41	0.69	1.228	1.506	1.267	1.09	0.88	1.848	1.168	1.302	1.024	0.76	1.406
Q9BXS5	1.315	1.167	2.226	1.754	0.702	0.532	0.551	1.04	1.988	1.92	1.252	2.267	1.55	0.659	0.469	1.104	2.069	2.437	1.338	1.158	0.77	1.798	1.279	1.627	0.723	1.363	1.634	1.33	0.766	0.7	1.103	0.782	1.529	1.425	0.985	2.096	1.091	0.709	1.27	1.57	1.193	1.174	0.699	1.698	1.354	1.207	1.032	0.754	1.357
P41218	1.529	1.268	2.351	1.783	0.804	0.632	0.687	1.179	2.128	2.534	1.492	2.664	1.771	0.891	0.552	1.235	2.325	2.915	1.819	1.388	0.99	2.227	1.479	1.926	0.906	1.64	1.875	1.634	0.937	0.846	1.24	0.906	1.636	1.617	1.074	2.241	1.269	0.781	1.473	1.685	1.298	1.432	0.852	2.132	1.494	1.313	1.175	0.883	1.45
Q96I24	1.277	1.07	2.07	1.599	0.65	0.51	0.578	0.916	1.83	1.979	1.164	2.075	1.479	0.682	0.422	0.96	1.773	2.28	1.434	1.075	0.79	1.756	1.163	1.477	0.706	1.286	1.521	1.314	0.742	0.641	1.027	0.731	1.349	1.273	0.864	1.94	1.025	0.652	1.146	1.406	1.089	1.17	0.668	1.715	1.214	1.095	1.021	0.76	1.242
Q9Y277	1.167	1.163	1.814	1.551	0.716	0.543	0.573	0.827	1.831	1.937	1.05	1.748	1.316	0.696	0.426	0.862	1.464	2.079	1.163	1.1	0.751	1.884	1.152	1.373	0.711	1.207	1.316	1.157	0.718	0.625	0.961	0.69	1.256	1.206	0.76	1.835	0.85	0.541	0.85	1.154	0.861	1.014	0.585	1.441	0.895	0.985	0.854	0.646	1.143
Q13492	1.232	1.08	1.955	1.501	0.654	0.517	0.556	0.999	1.851	2.124	1.21	2.052	1.504	0.696	0.444	1.056	1.932	2.164	1.326	1.104	0.784	1.773	1.252	1.461	0.746	1.363	1.472	1.366	0.79	0.653	1.064	0.828	1.377	1.326	0.942	1.952	1.008	0.707	1.131	1.436	1.137	1.092	0.696	1.703	1.246	1.14	1.051	0.757	1.333
O43684	1.305	1.065	2.146	1.686	0.629	0.489	0.555	0.957	1.919	2.087	1.125	2.003	1.406	0.652	0.383	0.907	1.824	2.182	1.38	1.121	0.775	1.757	1.157	1.471	0.717	1.26	1.466	1.317	0.739	0.657	1.055	0.719	1.324	1.258	0.838	1.909	1.057	0.658	1.158	1.397	1.048	1.171	0.653	1.71	1.188	1.14	0.992	0.77	1.26
O00487	1.283	1.088	2.067	1.598	0.654	0.522	0.547	0.905	1.894	1.947	1.228	2.3	1.692	0.719	0.46	0.959	1.762	2.537	1.435	1.126	0.748	1.761	1.197	1.476	0.673	1.221	1.431	1.264	0.696	0.653	0.999	0.713	1.241	1.168	0.79	1.868	0.97	0.605	1.109	1.273	1.014	1.011	0.615	1.523	1.119	1.112	0.982	0.767	1.203
P27635	1.381	1.196	2.585	2.016	0.685	0.553	0.634	1.075	2.34	2.311	1.307	2.493	1.64	0.729	0.471	1.123	2.094	2.64	1.519	1.225	0.89	2.011	1.264	1.681	0.772	1.423	1.736	1.488	0.86	0.732	1.18	0.884	1.513	1.437	0.977	2.213	1.047	0.65	1.189	1.361	1.041	1.167	0.657	1.776	1.158	1.134	1.023	0.762	1.268
Q15907	1.279	1.076	2.051	1.588	0.626	0.49	0.524	0.942	1.831	2.059	1.226	2.013	1.429	0.675	0.426	0.946	1.764	2.246	1.515	1.154	0.789	1.741	1.165	1.471	0.707	1.276	1.349	1.289	0.735	0.62	0.985	0.694	1.258	1.231	0.849	1.827	1.047	0.704	1.176	1.364	1.082	1.169	0.676	1.745	1.178	1.131	1.008	0.814	1.32
B4DDF4	1.504	1.243	2.439	1.692	0.648	0.507	0.564	1.15	2.072	2.171	1.315	2.32	1.847	0.798	0.446	1.138	1.891	2.291	1.605	1.311	0.892	1.93	1.457	1.79	0.8	1.486	1.699	1.703	0.889	0.765	1.186	0.934	1.542	1.522	0.923	2.202	1.225	0.761	1.201	1.661	1.157	1.09	0.596	1.652	1.316	1.195	1.126	0.805	1.384
P28070	1.246	1.076	2.128	1.692	0.64	0.456	0.554	0.923	1.901	2.009	1.265	2.229	1.49	0.682	0.398	0.952	1.798	2.395	1.488	1.157	0.752	1.737	1.202	1.467	0.696	1.211	1.419	1.332	0.726	0.674	1.045	0.729	1.268	1.204	0.783	1.929	1.005	0.653	1.086	1.338	1.017	1.006	0.595	1.493	1.172	1.105	0.96	0.725	1.206
P07741	1.392	1.181	2.35	1.835	0.714	0.523	0.552	1.038	2.078	2.273	1.458	2.704	1.793	0.798	0.519	1.17	2.407	2.922	1.626	1.233	0.826	1.836	1.31	1.677	0.754	1.351	1.547	1.396	0.778	0.716	1.062	0.777	1.356	1.354	0.918	2.071	0.925	0.622	0.97	1.193	0.948	0.998	0.568	1.484	1.074	1.154	1.042	0.781	1.308
F8W914										1.285	1.168	1.815	1.559	0.596	0.348	0.998	1.3	2.274	1.499	1.251	0.772	1.934	1.716	1.891	0.824	1.313	1.342	1.254	0.825	0.623	1.311	0.811	1.372	1.495	0.983	2.17	0.863	0.598	0.951	1.031	0.847	1.059	0.562	1.263	1.03	1.223	1.118	0.74	1.398
Q15424	1.235	0.888	1.571	1.116	0.563	0.436	0.525	0.782	1.396	2.242	1.028	1.572	1.105	0.612	0.364	0.768	1.357	1.771	1.425	1.008	0.751	1.598	1.007	1.349	0.59	1.113	1.261	1.264	0.658	0.571	1.004	0.612	1.133	1.127	0.779	1.726	1.087	0.661	1.204	1.501	1.054	1.168	0.655	1.968	1.171	1.241	1.159	0.85	1.367
P07686	1.284	1.046	2.209	1.668	0.602	0.487	0.515	1.112	1.999	1.91	1.286	2.338	1.624	0.751	0.457	1.043	1.892	2.482	1.451	1.107	0.773	1.709	1.246	1.495	0.689	1.297	1.479	1.326	0.738	0.635	0.981	0.729	1.252	1.225	0.821	1.926	0.96	0.635	1.041	1.319	0.995	1	0.588	1.528	1.159	1.074	0.968	0.683	1.203
Q86TX2	1.345	1.199	2.331	1.826	0.705	0.612	0.614	1.125	2.153	2.319	1.227	2.166	1.515	0.824	0.47	1.102	2.02	2.362	1.635	1.258	0.954	1.905	1.356	1.688	0.823	1.659	1.727	1.372	0.788	0.737	1.072	0.834	1.528	1.445	0.951	2.107	0.988	0.752	1.278	1.413	1.162	1.299	0.756	1.82	1.411	1.187	1.089	0.826	1.293
P39687	1.238	1.053	1.924	1.496	0.595	0.459	0.514	0.796	1.669	2.169	1.171	1.944	1.52	0.715	0.448	0.921	1.542	2.086	1.426	1.145	0.739	1.725	1.164	1.4	0.681	1.195	1.307	1.371	0.732	0.617	0.983	0.707	1.218	1.161	0.753	1.836	1.028	0.636	1.037	1.284	0.985	0.995	0.566	1.476	1.113	1.044	0.996	0.727	1.232
A0A1P0AYU5	1.322	1.13	2.029	1.6	0.716	0.628	0.658	0.933	1.945	2.265	1.27	2.198	1.582	0.802	0.503	1.053	1.902	2.447	1.471	1.219	0.916	1.991	1.303	1.727	0.857	1.535	1.755	1.377	0.844	0.78	1.121	0.864	1.47	1.484	1.034	2.134	1.029	0.659	1.187	1.442	1.111	1.209	0.685	1.884	1.275	1.199	1.043	0.828	1.356
P16278	1.272	1.099	2.189	1.76	0.68	0.517	0.573	1.053	2.018	1.888	1.363	2.517	1.707	0.663	0.464	1.118	2.225	2.692	1.288	1.182	0.817	1.632	1.251	1.641	0.791	1.385	1.726	1.268	0.739	0.645	1.012	0.735	1.342	1.26	0.891	1.941	0.92	0.693	1.025	1.252	1.023	1.097	0.648	1.535	1.122	1.133	1.053	0.797	1.351
P30050	1.233	1.061	1.941	1.465	0.645	0.479	0.557	0.785	1.623	1.98	1.158	1.915	1.337	0.68	0.468	0.954	1.745	2.065	1.418	1.226	0.81	1.794	1.228	1.556	0.744	1.326	1.477	1.42	0.758	0.684	1.027	0.713	1.291	1.245	0.842	2.018	1.096	0.721	1.218	1.37	1.067	1.182	0.65	1.938	1.157	1.155	1.066	0.811	1.313
P62917	1.461	1.179	2.207	1.682	0.731	0.562	0.636	1.025	1.952	2.726	1.414	2.267	1.689	0.855	0.529	1.067	1.838	2.476	1.837	1.352	0.956	2.258	1.396	1.758	0.784	1.488	1.707	1.574	0.925	0.832	1.218	0.883	1.551	1.49	0.962	2.311	1.079	0.684	1.236	1.479	1.105	1.225	0.688	1.839	1.171	1.195	1.083	0.822	1.369
Q9Y6G9	1.327	1.129	2.301	1.728	0.717	0.519	0.511	1.131	2.085	1.812	1.204	2.137	1.49	0.63	0.44	1.103	2.038	2.219	1.681	1.115	0.883	1.813	1.219	1.387	0.647	1.237	1.307	1.385	0.768	0.704	1.091	0.754	1.319	1.272	0.876	1.995	1.112	0.712	1.266	1.443	1.143	1.271	0.753	1.938	1.227	1.104	1.046	0.734	1.214
Q9UJZ1	1.166	1.062	1.993	1.509	0.66	0.549	0.612	0.94	1.895	1.949	1.144	1.973	1.426	0.688	0.409	1.027	1.839	2.215	1.362	1.116	0.739	1.679	1.15	1.405	0.659	1.158	1.459	1.221	0.772	0.672	1.023	0.715	1.335	1.297	0.88	2.093	0.941	0.597	1.135	1.465	1.095	1.1	0.626	1.684	1.184	1.017	0.941	0.742	1.178
O96008	1.168	1.069	2.157	1.693	0.597	0.465	0.536	0.924	1.953	1.636	1.29	2.323	1.581	0.6	0.39	1.064	2.034	2.554	1.154	1.141	0.729	1.782	1.23	1.637	0.7	1.228	1.754	1.196	0.746	0.636	1	0.678	1.263	1.203	0.769	2	0.916	0.628	0.974	1.267	0.95	0.966	0.597	1.445	1.227	0.978	0.928	0.73	1.161
Q96T76	1.363	1.174	2.143	1.613	0.786	0.678	0.636	1.099	2.119	2.144	1.31	2.058	1.488	0.79	0.677	1.09	1.665	2.484	1.423	1.152	0.825	1.811	1.246	1.551	0.801	1.348	1.575	1.244	0.763	0.682	1.038	0.796	1.349	1.438	0.906	1.995	1.063	0.641	1.195	1.458	1.041	1.176	0.691	1.838	1.213	1.187	1.091	0.802	1.351
P62993	1.257	1.077	2.114	1.614	0.607	0.452	0.497	0.963	1.814	2.035	1.325	2.297	1.606	0.733	0.443	1.063	1.846	2.411	1.536	1.164	0.77	1.733	1.191	1.428	0.664	1.231	1.42	1.301	0.721	0.621	1.061	0.733	1.264	1.215	0.8	1.947	1.085	0.74	1.197	1.485	1.094	1.164	0.666	1.718	1.256	1.192	1.06	0.801	1.295
A0A0J9YVP6	1.232	1.083	2.061	1.623	0.656	0.508	0.503	0.988	1.875	2.042	1.161	1.994	1.352	0.694	0.402	0.944	1.753	2.13	1.404	1.151	0.814	1.828	1.297	1.565	0.746	1.358	1.429	1.261	0.741	0.646	1.017	0.739	1.318	1.277	0.82	1.908	1.04	0.68	1.194	1.439	1.1	1.131	0.679	1.728	1.184	1.162	1.029	0.752	1.219
O60784	1.416	1.288	2.542	1.855	0.794	0.632	0.743	1.272	2.505	2.739	1.334	2.32	1.639	0.856	0.556	1.332	2.431	2.661	1.508	1.244	0.853	2.001	1.517	1.726	0.89	1.619	1.777	1.31	0.709	0.648	1.061	0.803	1.343	1.432	0.853	2.068	1.117	0.675	1.286	1.589	1.133	1.231	0.636	2.009	1.307	1.048	0.955	0.685	1.238
Q9BQG0	1.364	1.195	2.362	1.797	0.674	0.514	0.451	1.099	2.118	1.67	1.288	2.308	1.837	0.794	0.455	1.105	1.991	2.531	1.265	1.113	0.764	1.658	1.313	1.549	0.744	1.202	1.499	1.398	0.766	0.636	0.966	0.811	1.318	1.276	0.854	1.998	1.002	0.701	1.12	1.429	1.087	1.097	0.632	1.584	1.26	1.152	0.99	0.791	1.256
Q96T51	1.387	1.093	2.126	1.638	0.76	0.575	0.658	1.08	2.003	1.958	1.288	2.231	1.603	0.706	0.499	1.099	1.831	2.549	1.476	1.182	0.828	1.83	1.275	1.583	0.747	1.397	1.547	1.201	0.686	0.613	0.923	0.754	1.365	1.282	0.971	1.896	1.149	0.701	1.303	1.507	1.098	1.342	0.75	2.124	1.358	1.285	1.201	0.964	1.375
P41226	1.505	1.273	2.711	2.21	0.754	0.561	0.544	1.151	2.501	1.829	1.615	2.992	2.028	0.752	0.52	1.257	2.51	3.357	1.073	1.194	0.86	1.755	1.233	1.659	0.812	1.511	1.702	1.517	0.819	0.738	1.28	0.952	1.667	1.817	1.166	2.349	1.046	0.652	1.182	1.306	1.128	1.244	0.732	1.94	1.321	1.292	1.189	0.953	1.487
O00425	1.161	0.943	1.877	1.413	0.603	0.43	0.472	0.811	1.636	2.088	1.244	2.144	1.541	0.703	0.407	0.917	1.908	2.398	1.478	1.039	0.736	1.626	1.008	1.519	0.597	1.069	1.324	1.188	0.649	0.634	0.93	0.713	1.155	1.141	0.756	1.795	0.901	0.594	1.043	1.225	0.989	0.97	0.608	1.279	1.109	1.097	0.98	0.747	1.13
A0A1W2PNW1	1.407	1.19	2.307	1.782	0.754	0.56	0.53	1.062	2.172	1.803	1.214	2.31	1.583	0.707	0.514	0.999	2.079	2.487	1.448	1.245	0.874	1.944	1.385	1.773	0.874	1.554	1.827	1.388	0.772	0.704	1.137	0.828	1.45	1.414	0.949	2.105	0.984	0.688	1.154	1.34	1.127	1.28	0.705	1.685	1.321	1.202	1.076	0.775	1.287
P61020	1.293	1.113	1.882	1.495	0.679	0.566	0.656	0.991	1.784	2.201	1.139	1.713	1.202	0.735	0.457	0.86	1.54	1.84	1.568	1.19	0.823	1.998	1.358	1.629	0.76	1.488	1.574	1.423	0.767	0.754	1.277	0.847	1.395	1.362	0.994	2.051	1.168	0.758	1.331	1.688	1.241	1.348	0.766	2.064	1.414	1.244	1.122	0.839	1.404
J3KTL2	1.541	1.232	2.471	1.841	0.866	0.703	0.737	1.198	2.227	2.767	1.461	2.278	1.612	0.885	0.566	1.26	2.027	2.447	1.82	1.33	1.016	2.197	1.489	1.975	0.827	1.723	1.924	1.53	0.935	0.856	1.246	0.896	1.64	1.476	1.054	2.121	1.219	0.783	1.246	1.598	1.225	1.391	0.788	2.028	1.352	1.23	1.069	0.856	1.364
Q9Y2Z0	1.291	1.105	2.117	1.662	0.695	0.556	0.596	1.079	1.974	2.218	1.266	2.156	1.475	0.752	0.451	0.977	1.845	2.396	1.471	1.13	0.844	1.904	1.274	1.584	0.741	1.411	1.513	1.325	0.757	0.672	1.035	0.778	1.441	1.349	0.933	2.002	1.039	0.685	1.179	1.434	1.097	1.147	0.665	1.788	1.211	1.139	1.058	0.818	1.33
P61026	1.31	1.058	2.074	1.627	0.66	0.451	0.477	0.881	1.842	2.092	1.011	1.6	1.151	0.661	0.477	0.734	1.316	1.83	1.567	1.187	0.804	1.746	1.308	1.515	0.791	1.351	1.396	1.33	0.729	0.625	1.024	0.762	1.281	1.236	0.867	1.919	1.079	0.652	1.198	1.492	1.168	1.234	0.702	1.917	1.406	1.102	1.016	0.73	1.228
P61313	1.334	1.165	2.396	1.923	0.714	0.505	0.559	1.024	2.131	2.224	1.291	2.094	1.503	0.673	0.431	1.098	1.926	2.488	1.535	1.14	0.853	2.027	1.251	1.644	0.753	1.464	1.625	1.475	0.882	0.771	1.208	0.876	1.569	1.439	1	2.347	1.085	0.651	1.225	1.551	1.146	1.262	0.726	1.823	1.301	1.166	1.001	0.716	1.377
Q96P48	1.276	1.044	2.157	1.696	0.65	0.489	0.499	0.858	2.105	2.101	1.197	2.102	1.497	0.729	0.491	0.955	1.76	2.391	1.225	1.184	0.914	1.961	1.435	1.644	0.931	1.41	1.626	1.321	0.729	0.704	1.038	0.782	1.341	1.394	0.935	2.061	0.995	0.69	1.103	1.388	1.128	1.151	0.665	1.516	1.258	1.074	0.958	0.709	1.223
P47755	1.272	1.12	2.23	1.752	0.69	0.609	0.648	1.118	2.122	2.293	1.309	2.228	1.575	0.762	0.498	1.108	2.134	2.371	1.455	1.109	0.757	1.742	1.21	1.526	0.691	1.343	1.471	1.349	0.821	0.743	1.153	0.798	1.482	1.418	1.045	2.137	1.023	0.662	1.144	1.4	1.08	1.121	0.732	1.755	1.156	1.18	1.095	0.812	1.358
P35613	1.28	1.018	1.847	1.408	0.624	0.499	0.567	0.901	1.67	2.322	1.131	1.82	1.286	0.728	0.432	1	1.74	2.011	1.531	1.182	0.879	2.052	1.329	1.699	0.728	1.445	1.594	1.358	0.765	0.662	1.101	0.803	1.356	1.326	0.863	1.978	1.096	0.724	1.199	1.525	1.166	1.214	0.663	1.769	1.301	1.179	1.015	0.775	1.307
F8VZJ2	1.348	1.167	2.162	1.646	0.662	0.531	0.516	1.096	1.914	2.029	1.347	2.276	1.642	0.704	0.453	1.017	2.034	2.439	1.36	1.15	0.837	1.835	1.284	1.514	0.771	1.316	1.451	1.538	0.802	0.703	1.18	0.845	1.473	1.399	0.938	2.041	1.036	0.67	1.136	1.364	1.068	1.089	0.678	1.504	1.172	1.111	1.029	0.739	1.264
O75822	1.308	1.218	2.272	1.777	0.721	0.516	0.582	0.915	2.083	2.367	1.296	2.417	1.734	0.897	0.487	0.929	1.806	2.639	1.383	1.132	0.768	1.72	1.213	1.474	0.703	1.26	1.437	1.316	0.724	0.618	1.021	0.745	1.305	1.306	0.835	1.998	0.986	0.669	1.099	1.285	1.006	1.055	0.597	1.623	1.193	1.141	1.045	0.729	1.255
Q12904	1.315	1.107	2.248	1.71	0.695	0.514	0.567	0.99	1.978	2.256	1.295	2.177	1.517	0.726	0.441	1.054	1.988	2.315	1.444	1.205	0.82	1.829	1.29	1.588	0.746	1.36	1.548	1.332	0.746	0.682	1.076	0.812	1.373	1.328	0.885	1.982	1.05	0.643	1.193	1.463	1.127	1.143	0.632	1.738	1.251	1.18	1.08	0.755	1.319
Q9H1E3	1.386	1.076	1.648	1.272	0.719	0.585	0.635	0.956	1.599	2.689	1.179	1.47	1.026	0.8	0.457	0.772	1.27	1.695	1.727	1.217	0.862	1.816	1.228	1.572	0.653	1.346	1.332	1.386	0.758	0.616	1.052	0.857	1.488	1.458	1.021	1.985	1.139	0.763	1.409	1.632	1.173	1.498	0.741	2.502	1.378	1.312	1.187	0.901	1.533
E7EQL5										2.339	1.438	2.773	1.807	0.805	0.528	0.866	2.123	2.614										1.392	0.771	0.669	1.138	0.934	1.761	1.456	1.059	2.321										1.39	1.168	0.939	1.496
P50213	1.219	1.044	1.861	1.507	0.639	0.516	0.581	0.973	1.788	1.894	1.249	2.04	1.457	0.646	0.435	1.142	1.937	2.264	1.462	1.149	0.858	1.799	1.22	1.579	0.723	1.309	1.57	1.391	0.777	0.688	1.072	0.793	1.403	1.367	0.881	2.111	1.016	0.661	1.149	1.435	1.056	1.15	0.631	1.761	1.297	1.159	1.057	0.755	1.334
A0A2R8YEK8	1.057	0.95	1.621	1.313	0.576	0.509	0.46	0.765	1.492	2.272	1.02	1.566	1.211	0.695	0.444	0.899	1.42	1.816	1.293	1.088	0.815	1.757	1.196	1.47	0.812	1.394	1.399	1.209	0.713	0.602	1.031	0.752	1.289	1.297	0.868	1.866	0.887	0.588	1.042	1.255	0.955	1.023	0.563	1.647	1.133	1.15	1.018	0.789	1.321
P35637	1.846	1.449	3.192	2.378	0.924	0.706	0.817	1.424	2.66	3.334	1.638	2.617	1.751	1.113	0.619	1.286	2.163	2.773	2.398	1.456	1.284	2.727	1.762	2.134	0.81	1.918	2.087	1.538	0.917	0.843	1.272	0.923	1.626	1.588	1.021	2.195	1.67	0.8	1.653	2.247	1.273	1.461	0.902	2.923	1.753	1.629	1.208	1.056	1.935
H0Y2W2	1.249	1.064	1.974	1.561	0.646	0.486	0.539	0.856	1.816	2.246	1.256	2.122	1.53	0.73	0.483	1.046	1.885	2.341	1.387	1.189	0.817	1.789	1.224	1.588	0.732	1.318	1.554	1.29	0.757	0.677	1.059	0.752	1.413	1.326	0.894	1.975	1.041	0.709	1.198	1.415	1.088	1.227	0.693	1.77	1.251	1.147	1.04	0.811	1.256
P04179	1.715	1.431	2.553	1.781	0.877	0.663	0.725	1.224	2.152	2.828	1.638	2.571	1.858	1.022	0.652	1.33	2.064	2.474	2.037	1.459	1.013	2.156	1.672	2.019	0.927	1.637	1.833	1.748	0.982	0.892	1.142	0.972	1.677	1.615	1.058	2.007	1.845	1.358	1.924	2.577	1.873	1.641	1.119	2.71	2.001	1.656	1.553	1.249	2.011
P25788	1.268	1.118	2.179	1.722	0.658	0.488	0.501	0.94	1.911	2.272	1.192	2.025	1.412	0.685	0.419	0.939	1.859	2.201	1.442	1.138	0.775	1.773	1.179	1.457	0.679	1.268	1.429	1.352	0.734	0.65	1.032	0.744	1.303	1.223	0.831	1.96	1.056	0.665	1.147	1.383	1.05	1.139	0.655	1.783	1.264	1.109	0.988	0.717	1.192
A0A096LPI6	1.302	1.124	2.008	1.574	0.685	0.526	0.586	0.929	1.793	2.116	1.203	1.913	1.393	0.747	0.488	0.925	1.638	2.132	1.478	1.154	0.819	1.711	1.211	1.437	0.662	1.211	1.354	1.311	0.739	0.665	1.013	0.752	1.322	1.295	0.836	1.944	1.073	0.713	1.214	1.458	1.126	1.163	0.659	1.757	1.23	1.181	1.078	0.76	1.332
P21291	1.407	1.051	2.302	1.729	0.615	0.472	0.564	1.143	2.041	2.527	1.343	2.296	1.51	0.752	0.444	1.023	2.105	2.388	1.7	1.263	0.894	2.162	1.386	1.702	0.74	1.576	1.68	1.529	0.851	0.78	1.214	0.88	1.552	1.43	1.025	2.211	1.194	0.723	1.288	1.659	1.242	1.309	0.743	2.007	1.357	1.254	1.072	0.835	1.382
O95861	1.299	1.141	2.284	1.765	0.693	0.537	0.517	1.029	2.05	2.009	1.342	2.521	1.772	0.702	0.482	1.058	2.036	2.718	1.379	1.257	0.874	1.94	1.321	1.65	0.811	1.478	1.672	1.334	0.789	0.7	1.061	0.786	1.431	1.363	0.905	2.062	1.067	0.715	1.224	1.392	1.103	1.259	0.752	1.706	1.385	1.196	1.124	0.885	1.4
P62753	1.364	1.126	2.296	1.806	0.648	0.487	0.537	1.058	2.016	2.268	1.318	2.344	1.586	0.725	0.446	1.031	1.973	2.517	1.609	1.293	0.874	2.028	1.333	1.715	0.759	1.404	1.66	1.444	0.783	0.722	1.117	0.754	1.363	1.281	0.841	2.082	1.074	0.675	1.162	1.465	1.103	1.148	0.669	1.67	1.223	1.126	1.031	0.773	1.256
E7ESC6	1.361	1.213	2.262	1.768	0.722	0.567	0.61	1.04	2.038	1.886	1.3	2.153	1.481	0.652	0.416	1.077	1.859	2.401	1.34	1.255	0.818	1.896	1.407	1.727	0.883	1.538	1.642	1.219	0.7	0.681	1.012	0.756	1.378	1.372	0.911	1.911	0.968	0.8	1.246	1.294	1.081	1.197	0.727	1.588	1.292	1.196	1.051	0.738	1.392
P21283	1.264	1.14	2.157	1.637	0.676	0.563	0.557	1.002	1.975	2.164	1.077	1.901	1.455	0.74	0.409	0.907	1.787	2.213	1.444	1.111	0.761	1.759	1.247	1.472	0.686	1.305	1.5	1.288	0.709	0.611	1.017	0.767	1.323	1.253	0.856	1.931	1.089	0.69	1.101	1.385	1.065	1.128	0.635	1.673	1.233	1.187	1.095	0.727	1.367
P62491										2.815	1.088	1.369	0.99	0.744	0.529	0.786	1.2	1.551	1.652	1.093	0.746	1.969	1.146	1.589	0.519	1.098	1.471	1.306	0.78	0.677	1.194	0.839	1.613	1.541	1.015	2.195
P20339	1.299	1.071	1.763	1.471	0.725	0.64	0.71	1.05	1.823	2.14	1.094	1.731	1.232	0.686	0.428	0.931	1.614	2.061	1.367	1.124	0.872	1.947	1.296	1.61	0.858	1.541	1.604	1.359	0.752	0.718	1.105	0.847	1.465	1.585	1.025	2.229	1.004	0.689	1.165	1.411	1.18	1.358	0.78	2.076	1.316	1.081	1.047	0.783	1.269
P00441	1.675	1.196	2.8	1.627	0.554	0.51	0.663	0.994	2.043	2.772	1.27	2.482	1.536	0.873	0.48	1.056	1.68	2.386	1.753	1.119	0.926	1.85	1.158	1.639	0.672	1.356	1.492	1.49	0.745	0.791	0.97	0.862	1.511	1.339	0.927	2.142	1.332	0.853	1.228	1.595	1.236	1.26	0.779	2.023	1.431	1.243	1.151	0.979	1.456
Q13148	1.345	1.098	2.001	1.562	0.648	0.531	0.583	1.027	1.876	2.164	1.085	1.856	1.268	0.712	0.435	0.861	1.507	2.015	1.77	1.077	0.816	1.841	1.171	1.503	0.627	1.25	1.401	1.276	0.722	0.643	1.017	0.689	1.342	1.303	0.865	1.908	1.148	0.706	1.269	1.531	1.174	1.332	0.756	1.978	1.317	1.22	1.084	0.868	1.384
Q9Y371	1.306	1.133	2.235	1.67	0.675	0.529	0.543	1.039	1.949	1.896	1.239	2.252	1.648	0.704	0.433	1.082	1.95	2.415	1.37	1.146	0.771	1.683	1.219	1.461	0.716	1.214	1.33	1.311	0.724	0.622	1.018	0.799	1.335	1.304	0.836	1.892	1.015	0.657	1.075	1.401	1.051	1.07	0.569	1.622	1.206	1.125	1.107	0.719	1.31
P30466	1.281	1.067	1.873	1.47	0.681	0.596	0.696	0.97	1.733	2.211	1.135	2.03	1.489	0.803	0.42	1.102	1.817	2.3	1.738	1.168	0.898	2.115	1.344	1.607	0.721	1.437	1.626	1.319	0.775	0.672	1.108	0.86	1.612	1.413	0.916	2.23	1.205	0.75	1.415	1.798	1.303	1.306	0.76	2.239	1.474	1.259	1.094	0.868	1.438
P84085	1.321	1.189	2.035	1.663	0.634	0.548	0.469	1.076	1.916	2.298	1.135	2.178	1.551	0.828	0.479	1.133	1.743	2.355	1.722	1.188	0.821	2.025	1.376	1.721	0.777	1.54	1.584	1.404	0.79	0.721	1.135	0.784	1.46	1.422	0.993	2.139	1.061	0.692	1.221	1.505	1.166	1.168	0.679	1.862	1.25	1.212	1.006	0.766	1.305
Q99598	1.225	1.058	1.94	1.467	0.605	0.503	0.582	0.968	1.775	2.316	1.236	2.167	1.481	0.818	0.532	1.054	2.07	2.321	1.376	1.18	0.839	1.864	1.285	1.606	0.807	1.357	1.527	1.466	0.802	0.705	1.079	0.81	1.393	1.461	0.976	2.086	0.992	0.658	1.131	1.4	1.068	1.131	0.654	1.703	1.336	1.063	1.017	0.73	1.104
P24534	1.318	1.151	2.319	1.837	0.684	0.463	0.492	1.02	2.046	2.185	1.422	2.539	1.764	0.805	0.441	1.098	2.145	2.645	1.566	1.174	0.786	1.815	1.312	1.507	0.694	1.215	1.54	1.369	0.778	0.669	1.131	0.761	1.267	1.189	0.761	1.923	1.071	0.682	1.126	1.5	1.128	1.06	0.628	1.561	1.261	1.165	1.04	0.782	1.291
O94906	1.312	1.071	2.016	1.475	0.69	0.563	0.593	1.012	1.819	2.032	1.056	1.713	1.143	0.668	0.445	0.843	1.573	1.933	1.377	1.188	0.913	2.058	1.425	1.888	0.874	1.596	1.794	1.201	0.711	0.642	0.947	0.745	1.313	1.309	0.886	1.732	1.095	0.771	1.266	1.55	1.135	1.309	0.748	1.856	1.305	1.106	1	0.75	1.237
P06865	1.31	1.126	2.14	1.739	0.678	0.51	0.519	1.023	1.959	1.822	1.286	2.2	1.548	0.663	0.445	1.089	2.109	2.47	1.322	1.165	0.79	1.771	1.234	1.545	0.763	1.371	1.545	1.148	0.624	0.587	0.89	0.629	1.191	1.139	0.766	1.684	0.952	0.655	1.084	1.305	1.017	1.058	0.589	1.534	1.118	1.114	0.989	0.758	1.249
O60884	1.255	1.051	1.973	1.536	0.638	0.483	0.524	0.923	1.799	2.137	1.247	2.017	1.438	0.694	0.446	1.016	1.86	2.285	1.577	1.147	0.799	1.811	1.184	1.461	0.688	1.275	1.458	1.298	0.753	0.648	1.056	0.745	1.316	1.273	0.87	1.92	1.043	0.647	1.181	1.417	1.097	1.19	0.663	1.837	1.2	1.152	1.017	0.803	1.242
P51572	1.266	1.003	2.026	1.536	0.588	0.439	0.508	0.985	1.847	2.149	1.273	2.313	1.535	0.723	0.412	1.098	2.094	2.545	1.516	1.124	0.809	1.824	1.203	1.557	0.65	1.26	1.725	1.367	0.742	0.637	1.029	0.741	1.376	1.343	0.859	2.085	1.054	0.686	1.118	1.402	1.043	1.102	0.595	1.686	1.218	1.103	1.003	0.696	1.2
O43865	1.421	1.184	2.319	1.804	0.729	0.49	0.538	0.948	2.013	2.21	1.408	2.406	1.638	0.695	0.413	0.959	2.106	2.604	1.627	1.198	0.855	1.978	1.279	1.673	0.722	1.442	1.817	1.412	0.769	0.698	1.107	0.806	1.427	1.397	0.923	2.012	1.173	0.686	1.288	1.513	1.117	1.253	0.757	1.854	1.286	1.14	1.006	0.73	1.206
P55809	1.264	1.105	2.186	1.674	0.665	0.528	0.56	0.932	2.049	2.453	1.239	2.159	1.439	0.789	0.45	0.934	1.765	2.322	1.446	1.071	0.777	1.823	1.2	1.54	0.623	1.263	1.626	1.355	0.759	0.69	1.054	0.85	1.578	1.543	1.015	2.216	0.995	0.645	1.142	1.441	1.107	1.215	0.644	1.796	1.256	1.083	0.95	0.756	1.184
Q92597	1.553	1.254	2.664	2.171	0.674	0.537	0.655	1.418	2.381	2.476	1.348	2.513	1.635	0.877	0.466	1.126	2.242	2.551	1.784	1.261	0.891	2.036	1.455	1.767	0.811	1.628	1.78	1.53	0.785	0.735	1.252	0.916	1.51	1.437	0.961	2.335	1.176	0.729	1.303	1.801	1.342	1.319	0.735	1.97	1.394	1.395	1.148	0.925	1.636
O75489	1.369	1.243	2.365	1.835	0.691	0.549	0.534	1.131	2.203	2.032	1.281	2.255	1.635	0.694	0.44	1.081	1.959	2.517	1.336	1.202	0.781	1.687	1.298	1.538	0.786	1.314	1.496	1.406	0.785	0.688	1.064	0.793	1.332	1.346	0.891	2.018	1.127	0.734	1.232	1.505	1.135	1.257	0.729	1.729	1.387	1.178	1.077	0.787	1.37
P11177	1.208	1.044	2.069	1.681	0.66	0.445	0.493	0.945	1.828	1.965	1.175	2.061	1.427	0.664	0.385	1.08	1.945	2.222	1.541	1.149	0.808	1.935	1.375	1.689	0.692	1.412	1.699	1.372	0.792	0.659	1.171	0.823	1.55	1.452	0.942	2.129	1.085	0.712	1.158	1.591	1.191	1.111	0.63	1.699	1.319	1.192	1.027	0.782	1.4
Q6Y7W6	1.236	1.139	2.233	1.695	0.699	0.623	0.652	1.026	2.162	2.2	1.115	1.665	1.162	0.777	0.476	0.91	1.466	2.006	1.562	1.091	0.904	1.869	1.189	1.666	0.702	1.406	1.435	1.257	0.772	0.676	1.124	0.829	1.485	1.45	0.949	2.139	0.901	0.594	1.092	1.32	1.009	1.165	0.607	1.907	1.152	1.131	0.978	0.806	1.287
Q9UL25	1.35	1.162	2.22	1.666	0.688	0.521	0.62	0.969	1.904	2.266	1.116	1.744	1.261	0.701	0.436	0.979	1.664	2.052	1.628	1.184	0.846	1.957	1.306	1.573	0.73	1.347	1.466	1.403	0.811	0.698	1.149	0.799	1.343	1.345	0.899	2.005	1.1	0.696	1.259	1.479	1.2	1.218	0.718	1.919	1.215	1.205	1.092	0.807	1.404
P62841	1.302	1.08	2.247	1.82	0.702	0.511	0.621	0.95	1.998	2.402	1.343	2.399	1.616	0.793	0.492	1.046	2.017	2.573	1.627	1.267	0.872	2.181	1.411	1.784	0.773	1.426	1.716	1.471	0.798	0.694	1.193	0.825	1.489	1.392	0.861	2.148	1.14	0.733	1.221	1.6	1.166	1.194	0.688	1.725	1.297	1.103	0.994	0.707	1.264
P30495	1.329	1.29	2.329	1.834	0.825	0.634	0.82	1.103	2.217	1.998	1.453	2.581	1.915	0.855	0.46	1.229	2.494	3.055	1.155	1.596	0.906	1.889	1.46	1.634	0.985	1.478	1.963	1.39	0.806	0.73	1.134	0.829	1.347	1.455	0.884	2.166	1.066	0.755	1.341	1.59	1.377	1.206	0.826	1.705	1.388	1.389	1.314	1.027	1.571
P84095	1.404	1.21	2.345	1.804	0.752	0.616	0.656	1.066	2.157	2.722	1.226	2.096	1.577	0.833	0.48	1.106	1.733	2.357	1.83	1.257	0.873	1.993	1.338	1.738	0.809	1.536	1.687	1.494	0.917	0.695	1.184	0.814	1.558	1.497	1.055	2.235	1.208	0.715	1.346	1.701	1.3	1.434	0.785	2.05	1.668	1.35	1.197	0.852	1.394
Q13619	1.215	1.067	1.888	1.461	0.623	0.493	0.555	0.932	1.777	2.068	1.132	1.92	1.391	0.698	0.476	0.845	1.569	2.164	1.355	1.162	0.804	1.631	1.161	1.462	0.771	1.294	1.263	1.276	0.761	0.725	1.037	0.742	1.266	1.219	0.869	1.988	1.035	0.667	1.255	1.529	1.119	1.261	0.754	1.82	1.237	1.155	1.069	0.83	1.293
H3BQZ7	1.261	1.015	2.004	1.529	0.66	0.517	0.516	0.948	1.885	2.08	1.174	1.965	1.375	0.689	0.463	1.061	1.979	2.298	1.438	1.128	0.792	1.838	1.205	1.648	0.828	1.388	1.76	1.255	0.69	0.634	1.014	0.663	1.292	1.187	0.836	1.754	1.206	0.761	1.284	1.534	1.251	1.346	0.775	1.959	1.326	1.175	1.03	0.797	1.286
O75663	1.274	1.009	1.996	1.591	0.611	0.463	0.554	0.948	1.801	2.321	1.223	1.949	1.356	0.804	0.454	0.915	1.62	2.125	1.716	1.189	0.832	1.945	1.273	1.64	0.702	1.361	1.536	1.4	0.749	0.673	1.092	0.776	1.359	1.3	0.842	2.05	1.046	0.694	1.176	1.438	1.088	1.165	0.663	1.788	1.244	1.227	1.083	0.776	1.404
O60684	1.27	0.983	1.908	1.507	0.624	0.519	0.583	1.051	1.819	1.723	1.356	2.787	1.94	0.684	0.519	1.159	2.515	3.166	1.342	1.242	0.827	2.04	1.313	1.842	0.883	1.709	1.863	1.439	0.896	0.791	1.275	0.933	1.545	1.551	1.144	2.345	1.015	0.716	1.359	1.66	1.247	1.398	0.811	1.903	1.365	1.217	1.224	0.944	1.37
Q9HDC9	1.257	1.08	2.043	1.601	0.692	0.502	0.591	0.98	1.865	2.239	1.157	1.912	1.357	0.749	0.457	1.011	1.661	2.12	1.531	1.128	0.813	1.79	1.277	1.523	0.736	1.473	1.439	1.36	0.743	0.653	1.093	0.826	1.404	1.379	0.96	2.064	1.008	0.69	1.12	1.342	1.083	1.098	0.648	1.705	1.135	1.097	0.957	0.739	1.233
G3V0E4	1.423	1.265	2.325	1.759	0.753	0.577	0.606	1.069	2.186	2.325	1.167	2.078	1.517	0.794	0.504	1.059	1.87	2.174	1.4	1.308	0.877	1.857	1.322	1.575	0.89	1.459	1.468	1.383	0.747	0.736	1.117	0.827	1.437	1.432	0.945	2.068	1.073	0.765	1.334	1.573	1.274	1.324	0.729	1.964	1.297	1.233	1.104	0.885	1.373
Q96RQ3	1.496	1.269	2.571	1.942	0.818	0.624	0.686	1.184	2.336	2.041	1.35	2.252	1.542	0.81	0.507	0.959	1.8	2.398	1.603	1.248	0.906	2.054	1.353	1.734	0.778	1.494	1.664	1.364	0.851	0.688	1.159	0.725	1.464	1.396	0.941	2.214	1.023	0.702	1.211	1.374	1.206	1.209	0.679	1.687	1.301	1.245	1.111	0.81	1.427
Q12979	1.221	1.053	1.902	1.475	0.648	0.506	0.571	0.908	1.771	1.851	1.193	2.168	1.512	0.697	0.471	1.069	1.889	2.41	1.421	1.159	0.776	1.72	1.269	1.534	0.816	1.307	1.456	1.373	0.744	0.711	1.056	0.742	1.3	1.233	0.843	2.04	1.102	0.741	1.191	1.444	1.071	1.175	0.706	1.686	1.252	1.182	1.016	0.778	1.264
Q8TBC4	1.333	1.195	2.379	1.857	0.715	0.548	0.559	1.161	2.186	2.023	1.274	2.143	1.561	0.72	0.468	1.1	2.071	2.441	1.236	1.263	0.803	1.928	1.328	1.701	0.947	1.606	1.639	1.503	0.902	0.744	1.255	0.831	1.639	1.481	1.074	2.53	1.12	0.721	1.24	1.564	1.262	1.292	0.789	1.711	1.486	1.164	1.107	0.833	1.293
I3L397	1.254	1.019	1.902	1.427	0.612	0.499	0.597	0.882	1.666	2.402	1.204	1.99	1.361	0.824	0.533	0.89	1.573	2.144	1.701	1.187	0.79	1.793	1.17	1.477	0.67	1.208	1.409	1.332	0.725	0.648	0.984	0.67	1.232	1.131	0.767	1.773	1.045	0.713	1.133	1.314	0.989	1.078	0.595	1.676	1.094	1.183	1.074	0.809	1.276
Q01433	1.342	1.228	2.259	1.808	0.72	0.587	0.635	1.009	2.117	2.277	1.29	2.219	1.59	0.763	0.459	1.072	1.94	2.378	1.63	1.243	0.86	1.895	1.305	1.54	0.772	1.384	1.548	1.246	0.738	0.659	1.043	0.735	1.262	1.218	0.874	1.86	1.068	0.702	1.207	1.496	1.095	1.268	0.716	1.788	1.296	1.191	1.091	0.823	1.333
Q13098	1.283	1.096	2.016	1.567	0.64	0.529	0.564	1.002	1.894	1.937	1.069	1.744	1.277	0.644	0.403	0.926	1.542	1.923	1.419	1.1	0.773	1.826	1.239	1.586	0.699	1.354	1.401	1.269	0.785	0.716	1.047	0.725	1.321	1.268	0.849	1.942	1.052	0.724	1.129	1.4	1.096	1.135	0.644	1.737	1.213	1.102	1.038	0.774	1.386
P54886	1.26	1.076	2.164	1.681	0.709	0.575	0.613	1.022	2.1	2.053	1.21	2.003	1.421	0.779	0.501	0.969	1.85	2.458	1.329	1.112	0.779	1.713	1.253	1.647	0.704	1.37	1.692	1.337	0.751	0.717	1.026	0.877	1.633	1.495	1.066	2.141	1.011	0.635	1.184	1.351	1.117	1.16	0.702	1.692	1.289	1.206	1.082	0.849	1.344
Q9H9B4	1.32	1.088	2.097	1.616	0.713	0.538	0.609	0.923	1.933	2.259	1.146	1.936	1.392	0.81	0.472	0.885	1.723	2.246	1.499	1.116	0.784	1.698	1.215	1.476	0.692	1.273	1.352	1.281	0.762	0.662	1.048	0.721	1.307	1.296	0.84	2.028	1.043	0.713	1.172	1.414	1.099	1.195	0.68	1.843	1.304	1.079	0.973	0.757	1.227
P11217
Q16698	1.223	1.053	2.092	1.625	0.666	0.513	0.617	1.072	2.001	2.193	1.233	2.049	1.449	0.746	0.431	1.036	1.887	2.301	1.471	1.262	0.858	1.978	1.308	1.733	0.823	1.436	1.659	1.414	0.783	0.672	1.085	0.811	1.373	1.337	0.89	2.091	1.107	0.724	1.182	1.503	1.093	1.204	0.702	1.931	1.32	1.186	1.1	0.863	1.406
Q92688	1.255	0.996	1.945	1.558	0.604	0.43	0.549	0.876	1.737	1.901	1.141	1.916	1.512	0.709	0.444	0.884	1.577	2.201	1.299	1.06	0.674	1.517	1.103	1.297	0.655	1.08	1.159	1.27	0.714	0.612	1.001	0.697	1.186	1.136	0.778	1.779	0.965	0.605	1.039	1.242	0.945	0.97	0.576	1.479	1.05	1.065	0.969	0.631	1.118
Q16795	1.406	1.254	2.539	1.91	0.695	0.552	0.566	1.14	2.247	1.673	1.338	2.305	1.666	0.58	0.429	1.069	2.062	2.6	1.373	1.236	0.86	1.811	1.358	1.677	0.859	1.437	1.519	1.287	0.699	0.634	0.988	0.742	1.176	1.272	0.868	1.685	1.115	0.727	1.171	1.433	1.152	1.237	0.766	1.585	1.26	1.129	1.085	0.776	1.281
Q9P2R3	1.286	1.102	2.024	1.442	0.923	0.726	0.653	0.91	1.687	2.804	1.173	1.726	1.317	0.944	0.57	1.081	1.621	2.142	1.835	1.087	0.9	1.998	1.313	1.632	0.692	1.388	1.66	1.387	0.836	0.657	1.184	0.795	1.525	1.556	1.103	1.996	1.115	0.738	1.343	1.484	1.195	1.445	0.751	2.108	1.343	1.171	1.12	0.825	1.415
Q9HAV0	1.278	1.124	2.064	1.647	0.672	0.586	0.527	0.979	1.833	2.168	1.161	1.857	1.403	0.744	0.459	0.954	1.74	2.334	1.64	1.211	0.904	1.955	1.263	1.676	0.76	1.484	1.544	1.323	0.771	0.708	1.089	0.791	1.423	1.409	0.955	2.183	1.109	0.673	1.267	1.511	1.208	1.337	0.681	2.132	1.297	1.274	1.12	0.864	1.438
P49755	1.224	1.018	1.971	1.538	0.586	0.438	0.475	0.861	1.682	1.976	1.158	2.024	1.376	0.658	0.371	0.875	1.634	2.122	1.369	1.078	0.737	1.724	1.176	1.423	0.682	1.221	1.345	1.266	0.656	0.602	0.969	0.668	1.176	1.108	0.745	1.718	0.991	0.61	1.073	1.319	0.996	1.039	0.616	1.484	1.109	1.086	0.949	0.684	1.161
P06756	1.316	1.061	2.041	1.516	0.627	0.565	0.61	0.993	1.832	2.445	1.222	1.873	1.375	0.781	0.474	0.997	1.746	2.181	1.253	1.15	0.85	1.826	1.311	1.67	0.799	1.457	1.544	1.39	0.828	0.712	1.146	0.853	1.541	1.451	0.997	2.053	1.052	0.758	1.207	1.57	1.128	1.284	0.745	1.862	1.246	1.267	1.115	0.866	1.455
P51610	1.289	1.092	2.12	1.666	0.636	0.496	0.482	1.004	1.913	2.011	1.121	1.995	1.392	0.673	0.455	0.993	1.878	2.196	1.514	1.16	0.837	1.926	1.3	1.581	0.759	1.384	1.584	1.383	0.746	0.672	1.158	0.844	1.425	1.372	0.906	2.023	1.094	0.778	1.262	1.526	1.167	1.156	0.722	1.704	1.404	1.121	1.079	0.788	1.312
O76003	1.229	1.167	2.116	1.592	0.631	0.494	0.578	1.023	1.887	2.125	1.217	2.165	1.711	0.78	0.466	1.159	1.931	2.414	1.422	1.186	0.805	1.814	1.275	1.633	0.773	1.354	1.481	1.406	0.821	0.749	1.18	0.848	1.463	1.437	0.99	2.17	1.017	0.628	1.081	1.382	1.038	1.029	0.58	1.538	1.216	1.148	1.092	0.754	1.268
P55795	1.434	1.335	2.694	2.07	0.791	0.654	0.667	1.22	2.624	2.17	1.191	2.37	1.677	0.731	0.443	1.188	2.186	2.589	1.341	1.232	0.783	1.951	1.367	1.844	0.918	1.429	1.637	1.195	0.724	0.718	1.195	0.791	1.366	1.303	0.901	2.036	1.198	0.74	1.235	1.665	1.297	1.301	0.729	1.903	1.29	1.139	1.07	0.753	1.27
Q9UKV3	1.246	1.016	1.869	1.424	0.692	0.539	0.545	0.824	1.798	2.051	1.095	1.971	1.389	0.695	0.411	0.945	1.686	2.184	1.626	1.146	0.85	1.953	1.288	1.535	0.658	1.333	1.575	1.362	0.807	0.67	1.133	0.838	1.417	1.423	0.925	2.08	1.085	0.601	1.147	1.45	1.007	1.175	0.634	1.798	1.181	1.302	1.022	0.818	1.353
Q9H4E7	1.362	1.173	2.07	1.671	0.75	0.633	0.685	1.103	2.114	2.65	1.202	1.803	1.331	0.839	0.51	0.921	1.618	2.183	1.543	1.12	0.823	1.853	1.25	1.546	0.669	1.247	1.58	1.33	0.769	0.739	1.096	0.771	1.445	1.307	0.883	2.14	1.053	0.676	1.17	1.391	1.066	1.201	0.661	1.887	1.256	1.278	1.075	0.868	1.427
Q02543	1.308	1.035	1.93	1.501	0.657	0.516	0.602	0.89	1.731	2.24	1.207	1.952	1.348	0.729	0.464	0.946	1.699	2.12	1.517	1.231	0.889	2.022	1.278	1.686	0.788	1.369	1.593	1.375	0.777	0.721	1.075	0.789	1.417	1.358	0.901	2.045	1.099	0.666	1.219	1.448	1.109	1.166	0.723	1.784	1.206	1.152	1.043	0.761	1.293
Q9H993	1.34	1.149	2.088	1.646	0.633	0.547	0.581	1.162	1.863	2.398	1.32	2.371	1.65	0.858	0.524	1.084	2.057	2.567	1.805	1.231	0.855	1.919	1.293	1.565	0.722	1.308	1.694	1.341	0.733	0.66	1.043	0.781	1.342	1.234	0.82	1.968	1.088	0.668	1.143	1.333	1.069	1.171	0.655	1.613	1.488	1.147	1.03	0.762	1.272
A0A0D9SGG1	1.421	1.228	2.539	1.933	0.71	0.545	0.581	1.094	2.29	1.94	1.386	2.596	1.788	0.699	0.462	1.138	2.21	2.816	1.584	1.203	0.827	1.898	1.267	1.639	0.755	1.446	1.521	1.395	0.769	0.723	1.111	0.813	1.361	1.35	0.948	2.106	0.993	0.662	1.102	1.345	1.011	1.07	0.593	1.531	1.183	1.069	0.941	0.705	1.195
Q8TCS8	1.367	1.195	2.335	1.779	0.711	0.544	0.52	1.062	2.138	2.149	1.249	2.071	1.448	0.703	0.472	0.983	1.978	2.352	1.472	1.284	0.938	2.037	1.437	1.793	0.925	1.697	1.666	1.378	0.812	0.75	1.144	0.835	1.455	1.441	0.99	2.178	1.065	0.696	1.127	1.304	1.111	1.16	0.73	1.569	1.207	1.235	1.108	0.876	1.388
P16930	1.328	1.187	2.14	1.69	0.687	0.572	0.584	0.941	1.946	2.167	1.208	1.958	1.449	0.669	0.437	0.889	1.743	2.231	1.566	1.19	0.903	1.909	1.287	1.571	0.763	1.376	1.53	1.3	0.705	0.659	1.02	0.748	1.338	1.351	0.927	1.931	1.026	0.687	1.212	1.346	1.061	1.219	0.67	1.931	1.155	1.121	1.037	0.77	1.293
Q9NR31	1.304	1.114	1.995	1.537	0.606	0.5	0.525	1.002	1.802	2.111	1.123	1.883	1.328	0.7	0.459	0.874	1.633	2.041	1.568	1.159	0.852	1.875	1.286	1.68	0.766	1.447	1.572	1.414	0.78	0.679	1.068	0.764	1.351	1.342	0.921	1.969	1.112	0.709	1.247	1.506	1.199	1.311	0.711	1.935	1.37	1.197	1.054	0.797	1.282
Q08AM6	1.429	1.228	2.048	1.642	0.706	0.426	0.402	0.959	1.668	1.663	1.28	2.212	1.605	0.681	0.437	0.996	1.86	2.469	1.236	1.189	0.828	1.737	1.242	1.455	0.853	1.346	1.377	1.333	0.744	0.75	1.14	0.833	1.286	1.26	0.926	1.858	1.122	0.736	1.111	1.416	1.107	1.018	0.723	1.502	1.219	1.148	1.09	0.787	1.309
A0A0U1RQL8
Q8TCJ2	1.262	1.086	1.977	1.627	0.657	0.492	0.512	0.962	1.821	2.248	1.151	1.937	1.392	0.757	0.456	1.057	1.735	2.164	1.417	1.192	0.833	1.943	1.336	1.647	0.816	1.472	1.52	1.406	0.798	0.727	1.179	0.813	1.388	1.352	0.927	2.043	1.067	0.651	1.235	1.541	1.188	1.241	0.702	1.788	1.298	1.168	1.038	0.761	1.341
Q01105	1.142	1.027	1.719	1.408	0.551	0.431	0.478	0.936	1.456	1.859	1.119	1.863	1.389	0.664	0.4	0.988	1.617	1.96	1.413	1.113	0.709	1.531	1.175	1.347	0.664	1.14	1.212	1.297	0.759	0.635	1.007	0.779	1.236	1.211	0.789	1.827	0.953	0.62	1.047	1.303	1.021	0.982	0.575	1.5	1.092	1.136	1.041	0.76	1.218
K7ER96	1.246	1.05	1.96	1.554	0.64	0.46	0.573	0.97	1.798	2.252	1.225	1.89	1.331	0.691	0.397	0.952	1.708	2.05	1.522	1.16	0.806	1.85	1.25	1.505	0.708	1.273	1.523	1.396	0.767	0.652	1.098	0.779	1.416	1.387	0.926	2.051	1.1	0.723	1.227	1.562	1.189	1.235	0.705	1.902	1.367	1.217	1.088	0.82	1.375
P08559	1.295	1.101	2.158	1.7	0.661	0.48	0.541	0.955	1.977	1.888	1.295	2.348	1.696	0.665	0.409	1.054	2.024	2.617	1.389	1.255	0.851	1.83	1.419	1.678	0.784	1.436	1.543	1.377	0.83	0.733	1.137	0.821	1.421	1.402	0.942	2.104	1.039	0.69	1.149	1.423	1.108	1.147	0.726	1.677	1.29	1.208	1.086	0.82	1.335
P26010	1.247	1.047	1.862	1.529	0.7	0.547	0.603	0.931	1.813	2.441	1.043	1.601	1.104	0.75	0.441	0.854	1.463	1.845	1.289	1.136	0.802	1.665	1.171	1.415	0.753	1.346	1.294	1.238	0.682	0.644	0.947	0.769	1.366	1.313	0.957	1.948	1.072	0.671	1.225	1.509	1.16	1.285	0.712	1.898	1.264	1.163	1.083	0.82	1.398
H7C2N1	1.215	0.915	1.401	1.026	0.603	0.539	0.618	1.166	1.486	2.516	1.081	1.365	0.983	0.742	0.478	1.284	1.502	1.623	1.676	1.145	0.873	1.92	1.3	1.579	0.645	1.338	1.576	1.336	0.78	0.616	1.106	0.796	1.48	1.562	0.943	1.971	1.111	0.772	1.32	1.729	1.257	1.327	0.649	2.215	1.369	1.285	1.152	0.87	1.581
Q9Y2L1	1.406	1.171	1.972	1.551	0.692	0.596	0.652	0.914	1.887	2.144	1.195	1.918	1.318	0.76	0.455	0.9	1.722	2.182	1.361	1.278	0.897	1.932	1.368	1.638	0.88	1.388	1.544	1.246	0.702	0.665	1.078	0.762	1.465	1.31	0.969	2.069	1.119	0.762	1.213	1.505	1.16	1.364	0.808	1.928	1.334	1.084	1.043	0.825	1.254
Q9Y263	1.373	1.121	2.103	1.542	0.743	0.586	0.614	0.984	1.967	1.953	1.25	1.961	1.549	0.807	0.469	0.872	1.773	2.588	1.306	1.159	0.787	1.7	1.345	1.671	0.874	1.565	1.383	1.286	0.83	0.729	1.063	0.815	1.431	1.392	0.958	2.085	1.173	0.844	1.31	1.6	1.306	1.352	0.848	1.956	1.469	1.166	1.084	0.887	1.313
Q9H3S7	1.257	0.992	1.856	1.499	0.61	0.508	0.592	0.941	1.737	2.1	1.159	2.03	1.439	0.717	0.481	1.177	1.858	2.266	1.287	1.146	0.873	1.954	1.503	1.611	0.886	1.505	1.766	1.262	0.748	0.66	1.009	0.797	1.406	1.364	0.956	1.969	0.979	0.688	1.209	1.393	1.125	1.135	0.731	1.67	1.348	1.258	1.141	0.853	1.415
D6RB85	1.116	0.831	1.156	0.899	0.509	0.303	0.359	0.624	0.849	1.943	1.221	1.955	1.343	0.719	0.439	0.658	1.286	1.971	1.404	1.025	0.726	1.343	1.005	1.147	0.574	0.868	1.14	1.098	0.682	0.623	0.839	0.598	0.881	0.779	0.585	1.461	1.006	0.736	1.051	1.201	0.939	0.914	0.649	1.294	0.95	1.163	1.088	0.951	1.078
O00178	1.347	1.275	2.511	1.908	0.727	0.561	0.55	1.014	2.253	2.515	1.37	2.37	1.626	0.869	0.52	1.004	1.859	2.691	1.459	1.169	0.808	1.71	1.236	1.491	0.779	1.342	1.505	1.156	0.812	0.524	0.832	0.514	1.156	1.034	0.896	1.536	1.006	0.645	1.267	1.578	1.221	1.219	0.703	1.7	1.347	1.214	1.066	0.864	1.344
Q92930	1.355	1.314	2.425	1.937	0.813	0.595	0.615	1.023	2.339	2.36	1.12	1.676	1.177	0.782	0.466	0.924	1.575	2.118	1.714	1.169	0.846	1.906	1.256	1.379	0.684	1.246	1.275	1.291	0.752	0.66	1.124	0.723	1.373	1.4	0.852	2.034	1	0.656	1.166	1.402	1.093	1.157	0.579	1.856	1.195	1.119	1.073	0.752	1.332
Q9NQR4	1.429	1.268	2.464	1.901	0.731	0.52	0.57	1.022	2.198	2.058	1.394	2.371	1.622	0.722	0.461	0.972	2.092	2.58	1.432	1.265	0.903	1.993	1.365	1.652	0.799	1.468	1.503	1.391	0.784	0.709	1.072	0.804	1.402	1.378	0.918	2.027	1.117	0.747	1.248	1.465	1.147	1.238	0.72	1.826	1.292	1.244	1.161	0.874	1.372
Q14444	1.277	1.099	2.22	1.67	0.613	0.483	0.441	0.986	1.943	2.075	1.231	2.268	1.522	0.664	0.412	0.905	1.921	2.439	1.348	1.16	0.836	1.784	1.238	1.553	0.717	1.267	1.623	1.376	0.809	0.662	1.137	0.842	1.521	1.411	0.965	2.101	1.169	0.737	1.355	1.672	1.261	1.388	0.775	1.896	1.374	1.248	1.144	0.865	1.398
Q05209	1.339	1.104	2.017	1.548	0.705	0.633	0.609	0.943	1.768	2.396	1.282	2.091	1.537	0.813	0.472	1.051	1.785	2.485	1.446	1.164	0.799	1.809	1.305	1.577	0.778	1.287	1.617	1.422	0.783	0.692	1.198	0.807	1.434	1.375	0.901	2.301	1.092	0.668	1.217	1.494	1.083	1.22	0.675	1.93	1.342	1.168	1.114	0.825	1.265
P28482	1.35	1.122	2.389	1.782	0.68	0.555	0.586	1.066	2.122	2.201	1.34	2.309	1.656	0.757	0.451	1.103	1.986	2.523	1.407	1.165	0.802	1.748	1.24	1.456	0.761	1.312	1.42	1.33	0.735	0.672	1	0.751	1.358	1.31	0.854	1.97	1.016	0.68	1.219	1.424	1.142	1.17	0.715	1.739	1.25	1.151	1.077	0.791	1.318
P25787	1.269	1.092	2.079	1.648	0.663	0.488	0.552	0.913	1.772	2.047	1.104	1.931	1.376	0.705	0.426	0.874	1.721	2.095	1.537	1.216	0.814	1.878	1.256	1.555	0.744	1.336	1.486	1.427	0.769	0.701	1.04	0.755	1.356	1.303	0.876	1.922	1.045	0.64	1.12	1.342	1.031	1.085	0.613	1.69	1.179	1.111	1.024	0.757	1.298
Q10471	1.306	1.176	2.198	1.753	0.762	0.583	0.57	1.06	2.106	1.957	1.131	1.97	1.456	0.693	0.474	0.953	1.701	2.19	1.394	1.128	0.875	1.869	1.236	1.513	0.735	1.318	1.508	1.41	0.801	0.696	1.076	0.784	1.335	1.326	0.959	2.142	1.103	0.715	1.236	1.458	1.136	1.301	0.725	1.892	1.279	1.181	1.041	0.817	1.356
Q8NBQ5	1.281	1.094	1.971	1.504	0.645	0.506	0.589	0.831	1.767	2.363	1.247	2.115	1.519	0.841	0.506	0.832	1.647	2.372	1.372	1.144	0.764	1.732	1.197	1.496	0.736	1.223	1.394	1.277	0.692	0.622	0.961	0.675	1.124	1.049	0.765	1.795	1.074	0.671	1.118	1.348	1.022	1.101	0.654	1.599	1.191	1.156	1.043	0.821	1.212
Q14008	1.295	1.187	2.274	2.063	0.67	0.517	0.499	1.026	1.9	1.96	1.181	1.949	1.292	0.647	0.424	0.853	1.695	2.302	1.602	1.127	0.924	1.946	1.222	1.539	0.677	1.343	1.605	1.205	0.683	0.676	0.962	0.705	1.203	1.196	0.852	1.781	1.071	0.653	1.083	1.451	1.089	1.184	0.66	1.838	1.134	1.216	1.059	0.808	1.435
Q53EP0	1.439	1.39	3.105	2.5	0.829	0.595	0.664	1.275	2.836	2.452	1.114	1.918	1.331	0.742	0.53	0.923	1.684	2.087	1.652	1.17	0.892	1.941	1.179	1.617	0.744	1.479	2.078	1.31	0.805	0.706	1.091	0.845	1.486	1.363	0.981	2.103	1.124	0.653	1.136	1.314	1.119	1.208	0.7	1.651	1.357	1.088	0.916	0.721	1.209
P10253	1.341	1.182	2.455	1.827	0.777	0.625	0.622	1.067	2.305	1.915	1.298	2.383	1.74	0.771	0.549	1.223	2.254	2.744	1.501	1.216	0.872	1.78	1.294	1.658	0.839	1.403	1.57	1.325	0.802	0.695	1.112	0.82	1.444	1.415	0.996	2.142	1.054	0.729	1.233	1.453	1.189	1.313	0.794	1.918	1.353	1.151	1.04	0.792	1.262
E7ENQ1	1.349	1.102	2.078	1.569	0.725	0.577	0.65	0.932	1.803	2.697	1.304	2.018	1.39	0.82	0.494	1.035	1.835	2.363	1.712	1.2	0.848	1.882	1.222	1.542	0.739	1.39	1.317	1.483	0.797	0.687	1.197	0.859	1.537	1.513	1.124	2.145	1.152	0.734	1.342	1.681	1.198	1.441	0.828	2.092	1.52	1.32	1.081	0.859	1.429
Q8TAT6	1.219	1.058	2.082	1.653	0.625	0.494	0.512	0.89	1.93	1.487	1.307	2.711	1.786	0.551	0.378	0.923	2.219	2.731	1.466	1.241	0.702	1.671	1.246	1.551	0.718	1.226	1.372	1.345	0.778	0.666	1.064	0.796	1.381	1.416	0.871	1.981	1.132	0.772	1.2	1.425	1.217	1.256	0.701	1.608	1.312	1.173	1.002	0.814	1.345
Q9NZL9	1.336	1.142	2.07	1.555	0.679	0.542	0.563	0.939	1.874	2.071	1.14	1.954	1.492	0.713	0.432	0.891	1.632	2.135	1.505	1.201	0.79	1.741	1.24	1.495	0.704	1.253	1.45	1.469	0.812	0.674	1.11	0.821	1.329	1.341	0.869	2.058	1.135	0.728	1.197	1.47	1.107	1.135	0.637	1.728	1.258	1.193	1.116	0.779	1.295
P29966	1.361	1.165	2.016	1.535	0.708	0.588	0.689	1.014	1.876	2.768	1.065	1.703	1.168	0.825	0.428	1.005	1.813	1.815	1.743	1.126	0.871	1.981	1.247	1.655	0.648	1.338	1.534	1.419	0.813	0.698	1.084	0.846	1.557	1.519	0.975	2.118	1.279	0.984	1.542	1.905	1.456	1.474	0.71	2.804	1.546	1.467	1.343	1.039	1.717
Q9UNS2	1.346	1.166	2.096	1.614	0.669	0.545	0.571	0.971	1.865	2.145	1.185	1.924	1.45	0.757	0.437	0.944	1.795	2.115	1.461	1.237	0.808	1.876	1.289	1.57	0.753	1.346	1.608	1.361	0.797	0.682	1.02	0.789	1.35	1.353	0.893	1.92	1.02	0.732	1.152	1.49	1.111	1.158	0.62	1.71	1.3	1.224	1.103	0.797	1.33
Q99590	1.27	1.059	1.652	1.348	0.71	0.616	0.611	1.116	1.769	2.558	1.291	1.885	1.384	0.873	0.547	0.97	1.696	2.297	1.538	1.056	0.794	1.655	1.208	1.428	0.647	1.316	1.481	1.318	0.749	0.673	1.061	0.819	1.605	1.474	1.035	1.977	1.163	0.731	1.279	1.65	1.122	1.562	0.828	2.166	1.388	1.296	1.109	0.879	1.428
O75947	1.933	1.4	3.079	1.621	0.855	0.608	0.688	1.269	2.126	2.419	1.065	2.212	1.497	0.77	0.407	1.256	1.482	1.673	2.087	1.254	0.941	2.437	1.572	2.019	0.803	1.716	1.662	1.797	0.952	0.763	0.953	0.844	1.595	1.682	0.869	1.96	1.367	0.795	1.063	1.866	1.046	1.028	0.696	1.684	1.369	1.285	1.177	0.83	1.295
E9PFR3	1.169	1.113	2.136	1.902	0.697	0.451	0.423	0.953	1.958	2.298	1.279	2.219	1.526	0.76	0.52	1.034	2.111	2.443	1.445	1.267	0.86	2.012	1.325	1.721	0.833	1.431	1.665	1.376	0.787	0.721	1.122	0.803	1.381	1.415	0.928	2.065	1.042	0.627	1.096	1.415	1.044	1.098	0.605	1.659	1.288	1.177	1.102	0.803	1.43
P54727	1.379	1.126	2.091	1.583	0.604	0.527	0.581	0.892	1.829	2.296	1.287	2.219	1.643	0.775	0.466	0.982	1.945	2.477	1.599	1.286	0.796	1.852	1.299	1.653	0.702	1.25	1.51	1.5	0.784	0.67	1.142	0.872	1.438	1.427	0.916	2.052	1.079	0.695	1.147	1.446	1.073	1.106	0.617	1.738	1.222	1.22	1.114	0.774	1.356
Q13185	1.246	1.124	2.324	1.765	0.627	0.497	0.527	1.047	2.05	2.184	1.23	2.241	1.48	0.733	0.442	0.968	1.877	2.365	1.623	1.161	0.796	1.819	1.267	1.59	0.661	1.217	1.489	1.336	0.722	0.643	1.057	0.751	1.292	1.172	0.776	2.044	1.082	0.608	1.133	1.528	0.999	1.047	0.624	1.805	1.274	1.241	1.07	0.721	1.381
P22061	1.373	1.298	2.543	1.94	0.748	0.542	0.554	1.088	2.17	2.167	1.409	2.48	1.784	0.777	0.478	1.133	2.166	2.627	1.469	1.176	0.845	1.83	1.28	1.679	0.77	1.421	1.659	1.348	0.789	0.7	1.047	0.764	1.401	1.36	0.886	1.991	1.096	0.704	1.242	1.472	1.13	1.191	0.684	1.819	1.337	1.162	1.061	0.804	1.264
Q96CW1	1.282	1.043	1.996	1.53	0.635	0.489	0.512	0.907	1.821	2.093	1.201	2.046	1.439	0.713	0.433	0.948	1.726	2.301	1.421	1.162	0.798	1.78	1.222	1.461	0.753	1.278	1.368	1.283	0.703	0.671	0.995	0.71	1.247	1.218	0.837	1.802	1.014	0.658	1.136	1.303	1.012	1.104	0.636	1.616	1.11	1.088	0.984	0.732	1.15
Q2M389	1.194	1.071	2.029	1.656	0.664	0.483	0.479	0.948	1.943	1.272	1.215	2.361	1.706	0.515	0.417	0.99	2.158	2.715	1.015	1.133	0.721	1.675	1.308	1.592	0.935	1.498	1.398	1.48	0.805	0.806	1.112	0.893	1.488	1.513	1.172	2.198	1.067	0.694	1.182	1.515	1.134	1.09	0.775	1.594	1.281	1.152	1.103	0.764	1.347
Q92621	1.394	1.188	2.341	1.803	0.648	0.507	0.531	1.043	2.068	1.73	1.416	2.598	1.871	0.599	0.447	1.013	2.159	2.833	1.374	1.198	0.895	1.833	1.307	1.732	0.8	1.474	1.576	1.248	0.709	0.705	1.058	0.701	1.306	1.279	0.92	1.921	1.148	0.747	1.168	1.61	1.135	1.267	0.795	1.711	1.505	1.148	1.012	0.768	1.262
P61086	1.278	1.073	2.088	1.671	0.587	0.485	0.512	1.087	1.917	2.09	1.207	1.974	1.451	0.684	0.393	0.945	1.838	2.175	1.573	1.212	0.797	1.887	1.275	1.685	0.819	1.424	1.552	1.312	0.755	0.666	1.013	0.726	1.373	1.302	0.946	1.934	1.055	0.735	1.176	1.398	1.1	1.14	0.666	1.759	1.25	1.124	0.999	0.742	1.293
P14324	1.425	1.171	2.177	1.625	0.639	0.536	0.567	1.057	1.877	2.636	1.318	2.33	1.614	0.861	0.528	1.075	1.991	2.456	1.563	1.299	0.879	1.936	1.348	1.85	0.81	1.53	1.733	1.587	0.819	0.74	1.181	0.852	1.542	1.491	1.009	2.233	1.178	0.718	1.262	1.516	1.138	1.339	0.718	1.948	1.385	1.235	1.087	0.803	1.362
P06132	1.417	1.284	2.445	1.92	0.783	0.608	0.655	1.105	2.24	2.548	1.408	2.421	1.734	0.888	0.504	1.287	2.165	2.558	1.72	1.196	0.781	1.871	1.27	1.621	0.711	1.381	1.557	1.437	0.836	0.733	1.148	0.857	1.547	1.455	0.95	2.237	1.084	0.69	1.28	1.59	1.168	1.188	0.628	1.94	1.338	1.181	1.102	0.792	1.4
Q9UI12	1.297	1.141	2.41	1.885	0.715	0.509	0.506	1.087	2.171	1.925	1.269	2.042	1.43	0.652	0.431	0.92	1.803	2.26	1.308	1.073	0.786	1.762	1.247	1.529	0.754	1.281	1.417	1.265	0.78	0.652	1.022	0.785	1.288	1.269	0.841	1.864	1.102	0.706	1.165	1.505	1.115	1.167	0.7	1.667	1.261	1.163	1.049	0.766	1.299
Q9HB07	1.301	1.127	2.159	1.722	0.656	0.496	0.548	0.983	1.983	2.141	1.353	2.371	1.672	0.768	0.486	1.142	2.129	2.602	1.718	1.152	0.834	1.925	1.298	1.603	0.676	1.216	1.496	1.41	0.818	0.741	1.243	0.872	1.443	1.521	0.936	2.324	1.063	0.658	1.211	1.587	1.174	1.129	0.723	1.753	1.483	1.184	1.031	0.807	1.326
P17174	1.28	1.183	2.247	1.751	0.657	0.507	0.6	1.016	1.931	1.978	1.23	2.237	1.545	0.71	0.445	0.952	1.94	2.37	1.429	1.258	0.846	1.892	1.345	1.672	0.792	1.509	1.624	1.436	0.804	0.693	1.141	0.809	1.465	1.421	0.91	2.042	1.103	0.719	1.166	1.537	1.125	1.143	0.676	1.736	1.27	1.179	1.054	0.79	1.325
O43837	1.411	1.25	2.221	1.708	0.753	0.561	0.627	1.051	2.195	1.911	1.547	3.265	2.222	0.864	0.533	1.516	3.089	3.578	1.395	1.255	0.879	1.997	1.374	1.712	0.84	1.435	1.684	1.329	0.762	0.712	1.037	0.766	1.392	1.274	0.899	1.959	1.026	0.654	1.153	1.45	1.106	1.116	0.73	1.636	1.231	1.113	1.121	0.797	1.287
Q9UKG1	1.386	1.159	2.268	1.736	0.768	0.633	0.586	1.046	2.145	1.998	1.158	1.753	1.273	0.658	0.44	0.929	1.601	2.03	1.522	1.216	0.835	1.905	1.28	1.612	0.831	1.434	1.51	1.37	0.805	0.719	1.063	0.775	1.391	1.312	0.942	2.046	1.141	0.661	1.223	1.421	1.176	1.13	0.741	1.729	1.209	1.148	1.006	0.821	1.287
Q8IX12	1.265	1.059	2.017	1.547	0.638	0.551	0.561	0.992	1.92	2.231	1.09	1.846	1.376	0.77	0.429	0.914	1.552	2.266	1.651	1.038	0.792	1.833	1.18	1.484	0.677	1.306	1.43	1.36	0.802	0.648	1.083	0.82	1.332	1.422	0.972	2.053	1.186	0.714	1.325	1.826	1.329	1.286	0.682	2.324	1.446	1.236	1.057	0.835	1.329
Q15758	1.117	0.943	1.761	1.369	0.519	0.402	0.429	0.783	1.554	1.767	1.081	1.873	1.404	0.645	0.345	0.834	1.416	2.101	1.235	0.937	0.614	1.348	0.984	1.16	0.589	0.976	1.09	1.129	0.621	0.564	0.87	0.631	1.049	1.021	0.658	1.598	0.86	0.558	0.934	1.142	0.872	0.873	0.507	1.285	0.974	0.941	0.929	0.68	1.043
A0A0A0MTH3	1.258	1.126	2.131	1.678	0.66	0.51	0.543	1.003	1.884	2.223	1.2	2.126	1.517	0.76	0.458	0.92	1.782	2.349	1.349	1.139	0.73	1.81	1.296	1.459	0.711	1.191	1.503	1.384	0.745	0.69	1.143	0.792	1.284	1.244	0.852	2.078	1.031	0.643	1.122	1.405	1.032	1.036	0.598	1.599	1.146	1.162	1.032	0.765	1.308
Q00325	1.294	1.069	2.087	1.711	0.619	0.45	0.52	0.918	1.792	2.149	1.195	2.044	1.457	0.688	0.441	1.002	1.877	2.303	1.634	1.183	0.782	1.966	1.249	1.573	0.714	1.281	1.587	1.403	0.759	0.693	1.113	0.763	1.349	1.294	0.878	2.084	1.05	0.623	1.108	1.379	1.009	1.086	0.617	1.672	1.174	1.174	1.026	0.742	1.298
P30086	1.286	1.098	2.31	1.846	0.704	0.509	0.556	0.985	2.001	2.131	1.433	2.341	1.553	0.747	0.489	1.061	2.08	2.483	1.656	1.148	0.909	1.966	1.264	1.571	0.704	1.423	1.549	1.337	0.742	0.769	1.035	0.778	1.404	1.242	0.863	1.852	1.153	0.795	1.293	1.5	1.203	1.337	0.778	2.09	1.314	1.156	0.975	0.887	1.338
P30154																			1.325	1.618	1.025	1.891	1.847	1.983	1.377	1.886	1.956	1.566	0.678	0.612	1.137	0.802	1.272	1.222	1.082	2.225	1.19	0.753	1.28	1.768	1.212	1.331	0.821	1.576	1.172
P62280	1.284	1.039	1.998	1.558	0.594	0.48	0.551	0.944	1.787	2.226	1.242	2.106	1.446	0.721	0.455	0.913	1.795	2.312	1.717	1.304	0.861	1.931	1.264	1.634	0.739	1.402	1.523	1.395	0.8	0.686	1.073	0.764	1.363	1.281	0.872	2.042	1.085	0.675	1.19	1.436	1.095	1.137	0.652	1.785	1.183	1.148	1.067	0.79	1.318
P53582	1.412	1.246	2.48	1.921	0.752	0.621	0.67	1.084	2.373	2.256	1.209	2.175	1.438	0.768	0.507	1.089	1.974	2.542	1.504	1.219	0.858	1.936	1.293	1.686	0.79	1.51	1.621	1.311	0.786	0.696	1.048	0.781	1.435	1.356	0.949	2.117	1.179	0.745	1.282	1.557	1.258	1.438	0.82	2.067	1.38	1.136	1.049	0.805	1.27
Q8WU90	1.354	1.107	2.119	1.658	0.658	0.559	0.623	1.081	1.941	2.716	1.331	2.241	1.604	0.883	0.507	1.047	2.024	2.543	1.612	1.172	0.814	1.955	1.246	1.548	0.71	1.33	1.587	1.401	0.782	0.719	1.146	0.818	1.409	1.407	0.878	2.021	1.014	0.629	1.162	1.419	1.085	1.211	0.66	1.843	1.207	1.164	1.05	0.795	1.303
Q9UJY5	1.295	1.105	2.283	1.869	0.701	0.548	0.624	1.157	2.055	2.396	1.392	2.436	1.761	1.032	0.52	1.187	2.275	3.021	1.544	1.241	0.793	1.814	1.343	1.633	0.744	1.293	1.919	1.339	0.717	0.672	1.142	0.832	1.359	1.375	0.884	2.321	1.09	0.649	1.124	1.382	1.092	1.137	0.688	1.71	1.471	1.08	0.963	0.682	1.243
P48047	1.333	1.17	2.173	1.683	0.693	0.497	0.564	0.97	1.889	2.005	1.252	2.149	1.553	0.744	0.467	0.952	1.81	2.362	1.63	1.243	0.864	1.998	1.332	1.669	0.796	1.366	1.502	1.379	0.801	0.682	1.048	0.739	1.286	1.252	0.828	1.933	1.102	0.754	1.13	1.461	1.106	1.094	0.612	1.61	1.221	1.09	1.064	0.722	1.241
P33241	1.468	1.359	2.049	1.526	0.875	0.693	0.889	1.194	2.03																												1.029	0.795	1.406	1.817	1.322	1.443	0.625	2.642	1.253	1.285	1.108	0.94	1.452
A0A1W2PS43	1.364	1.157	1.988	1.498	0.637	0.534	0.588	0.99	1.786	2.075	1.219	2.038	1.472	0.752	0.428	0.96	1.738	2.323	1.426	1.18	0.784	1.754	1.264	1.547	0.715	1.257	1.493	1.388	0.731	0.653	1.07	0.757	1.299	1.31	0.81	1.981	1.154	0.704	1.164	1.486	1.092	1.08	0.569	1.742	1.286	1.25	1.114	0.761	1.407
O60711	1.343	1.144	2.063	1.599	0.683	0.579	0.683	0.966	1.89	2.299	1.077	1.404	1.204	0.757	0.373	0.951	1.222	1.741	1.536	1.207	0.894	2.043	1.398	1.819	0.793	1.461	1.591	1.499	0.785	0.696	1.129	0.862	1.421	1.411	0.95	2.012	1.111	0.723	1.194	1.516	1.118	1.264	0.708	1.863	1.226	1.149	1.076	0.853	1.31
P28288	1.333	1.137	2.136	1.693	0.649	0.559	0.545	0.985	2.015	1.819	1.177	2.033	1.505	0.668	0.373	1.05	1.926	2.239	1.459	1.156	0.794	1.841	1.262	1.572	0.732	1.484	1.518	1.289	0.741	0.665	1.01	0.759	1.339	1.3	0.889	1.937	1.081	0.7	1.185	1.334	1.025	1.255	0.738	1.732	1.203	1.1	1.01	0.753	1.237
P28062	1.335	1.19	2.206	1.768	0.739	0.593	0.637	1.003	2.036	2.241	1.21	1.927	1.379	0.732	0.48	1.027	1.832	2.179	1.41	1.252	0.894	2.081	1.376	1.773	0.804	1.529	1.762	1.395	0.83	0.709	1.146	0.851	1.639	1.549	1.056	2.223	1.051	0.696	1.224	1.504	1.19	1.346	0.73	2.101	1.344	1.151	1.058	0.776	1.368
A0A0G2JLB3	1.392	1.16	2.204	1.718	0.711	0.573	0.593	0.981	2.02	1.864	1.386	2.365	1.616	0.701	0.476	1.027	2.033	2.669	1.098	1.237	0.877	1.815	1.38	1.761	0.918	1.461	1.768	1.305	0.736	0.71	1.06	0.737	1.278	1.26	0.826	1.995	1.063	0.71	1.213	1.462	1.136	1.227	0.695	1.766	1.326	1.176	1.066	0.768	1.319
P43897	1.285	1.141	2.383	1.881	0.729	0.595	0.573	1.06	2.153	1.903	1.33	2.085	1.511	0.771	0.45	0.895	1.786	2.303	1.445	1.333	0.92	2.096	1.42	1.767	0.859	1.495	1.89	1.469	0.821	0.651	1.099	0.779	1.473	1.413	0.868	2.061	1.072	0.695	1.17	1.457	1.008	1.125	0.761	1.659	1.329	1.145	1.005	0.793	1.283
P52888	1.289	1.1	2.104	1.642	0.693	0.591	0.639	0.996	1.979	2.165	1.278	2.096	1.543	0.766	0.465	1.009	1.859	2.371	1.452	1.189	0.844	1.869	1.347	1.661	0.783	1.411	1.593	1.403	0.775	0.688	1.136	0.794	1.391	1.348	0.946	2.123	1.046	0.715	1.168	1.42	1.063	1.092	0.689	1.649	1.193	1.174	1.049	0.802	1.356
D6RBZ0	1.493	1.166	2.357	1.772	0.686	0.597	0.677	1.076	1.955	2.32	1.189	2.006	1.302	0.757	0.603	0.936	1.654	2.071	1.933	1.25	0.872	1.887	1.242	1.558	0.748	1.317	1.368	1.461	0.814	0.72	1.118	0.797	1.352	1.37	0.864	1.939	1.12	0.73	1.25	1.484	1.17	1.123	0.643	1.815	1.162	1.235	1.173	0.838	1.339
Q9P0L0	1.534	1.226	2.761	1.749	0.697	0.538	0.648	1.114	2.078	2.587	1.398	2.58	1.595	0.905	0.474	1.304	1.949	2.128	2.02	1.233	1.01	2.167	1.567	1.968	0.78	1.583	1.813	1.623	0.81	0.81	1.105	0.932	1.569	1.542	1.003	1.953	1.352	0.833	1.263	1.655	1.16	1.117	0.698	1.895	1.367	1.256	1.196	0.991	1.487
P43487	1.271	1.025	2.053	1.547	0.646	0.516	0.522	1.151	1.815	1.998	1.35	2.255	1.635	0.733	0.455	1.209	2.158	2.409	1.555	1.128	0.809	1.828	1.289	1.567	0.684	1.284	1.51	1.332	0.796	0.627	1.032	0.799	1.386	1.297	0.896	1.909	1.073	0.735	1.155	1.44	1.127	1.143	0.626	1.727	1.175	1.241	1.102	0.842	1.386
O94826	1.41	1.092	2.076	1.598	0.669	0.527	0.6	1.076	1.89	2.476	1.227	2.028	1.448	0.771	0.421	0.989	1.904	2.186	1.536	1.224	0.845	1.917	1.302	1.659	0.757	1.407	1.719	1.378	0.757	0.664	1.059	0.796	1.432	1.374	0.907	2.05	1.137	0.735	1.257	1.589	1.166	1.348	0.712	2.048	1.456	1.258	1.132	0.818	1.416
Q9Y2B0	1.257	1.144	2.034	1.62	0.682	0.553	0.592	1.026	1.957	2.463	1.201	1.909	1.476	0.869	0.505	1.008	1.65	2.178	1.614	1.177	0.832	1.82	1.231	1.522	0.691	1.266	1.455	1.363	0.776	0.676	1.061	0.799	1.422	1.364	0.913	2.004	1.179	0.739	1.283	1.641	1.291	1.299	0.737	2.061	1.38	1.198	1.106	0.793	1.322
Q92905	1.3	1.139	2.031	1.752	0.718	0.495	0.548	1.085	1.778	2.049	1.187	2.055	1.421	0.7	0.455	0.961	1.998	2.345	1.349	1.228	0.808	1.913	1.362	1.579	0.791	1.37	1.549	1.47	0.784	0.732	1.145	0.766	1.43	1.301	0.975	2.066	1.014	0.634	1.088	1.347	1.053	1.019	0.699	1.447	1.169	1.194	1.053	0.798	1.37
A0A0U1RQX8	1.402	1.192	2.508	1.882	0.751	0.552	0.593	1.122	2.144	2.186	1.227	2.121	1.501	0.833	0.486	1.034	1.973	2.361	1.534	1.171	0.81	1.865	1.271	1.562	0.713	1.3	1.559	1.387	0.779	0.717	1.142	0.805	1.425	1.354	0.938	2.153	1.16	0.769	1.31	1.566	1.245	1.29	0.748	1.942	1.361	1.271	1.133	0.85	1.41
P32119	1.281	1.054	1.88	1.481	0.622	0.511	0.549	0.899	1.719	2.438	1.383	2.255	1.617	0.808	0.492	1.036	1.688	2.309	1.536	1.205	0.823	1.86	1.273	1.488	0.691	1.246	1.483	1.429	0.778	0.657	1.004	0.715	1.338	1.264	0.848	1.957	1.091	0.69	1.183	1.404	1.05	1.139	0.632	1.753	1.175	1.136	1.081	0.791	1.3
O15511	1.395	1.239	2.386	1.886	0.734	0.565	0.619	1.053	2.065	2.041	1.282	2.17	1.58	0.695	0.47	1.114	1.997	2.404	1.534	1.262	0.864	1.972	1.357	1.671	0.751	1.383	1.71	1.489	0.796	0.693	1.09	0.808	1.401	1.293	0.89	2.134	1.114	0.711	1.233	1.519	1.14	1.158	0.624	1.849	1.324	1.227	1.122	0.835	1.342
P04080	1.959	1.1	3.107	1.79	0.607	0.42	0.541	0.826	2.039	3.002	1.05	2.028	1.245	0.542	0.369	1.092	1.451	1.839	2.367	1.003	0.806	2.964	1.049	1.916	0.698	1.81	1.552	1.578	0.793	0.656	0.83	0.618	1.344	1.556	0.788	1.722	1.4	0.649	0.845	1.828	0.873	1.081	0.846	1.625	1.315	1.122	1.007	0.711	1.024
P0CG38
H0Y4R4																			1.136	1.298	0.759	1.686	1.125	1.448	0.791	1.458	1.408	1.335	0.729	0.639	0.925	0.606	1.21	1.38	0.798	1.767	0.893	0.604	1.003	0.945	0.779	0.942	0.576	1.536	0.935
J3KRX5	1.478	1.196	2.442	1.892	0.701	0.56	0.567	1.111	2.114	2.514	1.383	2.486	1.725	0.814	0.486	1.169	2.24	2.563	1.844	1.503	0.973	2.293	1.524	1.898	0.854	1.611	1.844	1.617	0.944	0.787	1.24	0.884	1.539	1.519	0.952	2.291	1.097	0.692	1.198	1.426	1.043	1.1	0.66	1.733	1.211	1.216	1.118	0.83	1.363
R4GMQ1	1.248	1.09	2.223	1.769	0.653	0.542	0.507	0.946	2.062	1.67	1.15	2.056	1.442	0.696	0.437	1.133	1.838	2.38	1.259	1.21	0.884	1.99	1.325	1.827	0.897	1.483	1.861	1.352	0.716	0.731	0.989	0.784	1.16	1.298	0.921	1.995	0.93	0.769	1.233	1.373	1.242	1.252	0.743	1.596	1.31	1.086	1.135	0.735	1.49
P30405	1.437	1.145	2.215	1.68	0.711	0.49	0.596	0.88	1.92	2.285	1.379	2.324	1.51	0.83	0.481	0.974	1.697	2.545	1.799	1.25	0.874	2.012	1.217	1.622	0.685	1.268	1.586	1.473	0.761	0.737	1.067	0.688	1.265	1.185	0.774	2.073	1.169	0.72	1.239	1.511	1.1	1.095	0.632	1.789	1.286	1.184	1.152	0.814	1.35
A0A087WVM4	1.307	1.174	2.138	1.737	0.636	0.469	0.392	1.022	1.874	1.467	1.211	2.198	1.597	0.591	0.39	0.863	1.775	2.459	1.299	1.27	0.892	1.818	1.452	1.673	0.819	1.275	1.453	1.267	0.757	0.644	0.954	0.712	1.281	1.23	0.859	1.91	0.981	0.651	1.065	1.301	1.132	1.043	0.66	1.552	1.242	1.096	1.013	0.79	1.191
O94874	1.387	1.273	2.602	2.075	0.741	0.595	0.596	1.109	2.392	1.517	1.128	2.048	1.466	0.603	0.375	1.002	1.919	2.264	1.266	1.158	0.816	1.832	1.303	1.541	0.808	1.443	1.4	1.308	0.823	0.671	1.059	0.8	1.441	1.453	0.958	1.971	1.021	0.661	1.162	1.441	1.109	1.169	0.684	1.66	1.202	1.158	1.078	0.764	1.288
P18463	1.29	1.185	1.886	1.448	0.656	0.651	0.705	1.05	1.759	1.286	1.087	1.514	1.149	0.341	0.422	0.94	1.517	1.975	0.838	1.267	1.086	2.004	1.575	1.683	0.895	1.819	1.708	1.282	0.738	0.719	1.23	0.795	1.791	1.683	1.241	2.216	1.133	0.656	1.291	1.588	1.201	1.576	0.819	2.458	1.237	1.254	0.96	0.804	1.46
P61019	1.404	1.211	2.33	1.753	0.747	0.582	0.548	0.976	2.064	2.012	1.198	2.134	1.622	0.707	0.469	0.855	1.811	2.333	1.307	1.124	0.752	1.644	1.21	1.516	0.731	1.308	1.503	1.262	0.726	0.681	0.985	0.734	1.36	1.266	0.9	1.922	1.007	0.718	1.12	1.306	1.042	1.13	0.691	1.627	1.195	1.162	1.084	0.815	1.295
Q13303	1.229	1.113	2.094	1.586	0.627	0.509	0.552	0.992	1.909	2.05	1.237	2.171	1.544	0.711	0.454	1.022	1.865	2.388	1.423	1.109	0.744	1.71	1.222	1.483	0.687	1.237	1.528	1.326	0.72	0.628	1.021	0.733	1.288	1.281	0.837	1.924	0.96	0.609	1.082	1.283	1.004	1.058	0.627	1.575	1.178	1.066	0.995	0.73	1.24
Q15286	1.317	1.132	1.965	1.524	0.635	0.509	0.511	0.946	1.795	2.38	1.081	1.781	1.296	0.757	0.413	0.69	1.335	1.901	1.604	1.096	0.772	1.598	1.11	1.337	0.643	1.176	1.106	1.253	0.96	0.748	1.121	0.852	1.645	1.617	1.085	1.968	0.949	0.654	1.126	1.3	0.99	1.098	0.623	1.783	1.064	1.112	1.026	0.766	1.186
Q9HBI0	1.264	1.155	2.119	1.713	0.612	0.454	0.444	1.094	1.876	1.998	1.21	2.09	1.527	0.719	0.464	0.995	1.892	2.281	1.322	1.199	0.792	1.818	1.335	1.547	0.839	1.342	1.568	1.275	0.749	0.677	1.007	0.703	1.181	1.064	0.774	1.825	1.124	0.737	1.134	1.543	1.177	1.108	0.696	1.544	1.255	1.149	1.038	0.749	1.26
P00390	1.268	1.133	1.966	1.559	0.723	0.57	0.509	0.993	1.788	1.854	1.456	2.429	1.702	0.787	0.575	1.17	2.113	2.886	1.381	1.402	0.983	2.016	1.511	1.773	0.92	1.637	1.795	1.253	0.772	0.683	1.003	0.751	1.302	1.227	0.874	1.857	1.189	0.76	1.331	1.655	1.259	1.464	0.775	2.086	1.421	1.129	1.069	0.807	1.331
O00303	1.267	1.065	1.858	1.45	0.702	0.596	0.574	1.007	1.756	2.106	1.236	2.032	1.446	0.699	0.426	1.012	1.956	2.277	1.519	1.215	0.853	1.895	1.349	1.607	0.774	1.451	1.586	1.302	0.803	0.701	1.05	0.805	1.512	1.38	0.938	2.001	1.086	0.753	1.22	1.48	1.213	1.249	0.739	1.788	1.316	1.199	1.1	0.809	1.338
P53999	1.287	1.036	2.102	1.609	0.618	0.415	0.497	0.802	1.657	2.457	1.512	2.614	1.67	0.85	0.483	1.13	1.908	2.617	1.59	1.128	0.785	1.682	1.218	1.457	0.67	1.18	1.426	1.426	0.721	0.688	1.036	0.733	1.164	1.138	0.756	1.82	1.038	0.69	1.074	1.314	1.022	0.979	0.598	1.505	1.173	1.135	0.974	0.797	1.234
Q9NZM1	1.401	1.1	2.508	1.956	0.816	0.561	0.597	1.09	2.335	2.338	1.183	2.034	1.52	0.799	0.529	0.948	1.653	2.293	1.77	1.284	0.868	2.065	1.334	1.595	0.783	1.44	1.675	1.435	0.778	0.687	1.114	0.866	1.519	1.436	0.977	2.276	1.13	0.667	1.179	1.439	1.105	1.228	0.718	1.836	1.252	1.192	1.065	0.847	1.331
Q969V3	1.354	1.168	2.465	1.975	0.725	0.568	0.541	1.091	2.339	1.866	1.299	2.394	1.664	0.707	0.499	1.183	1.906	2.535	1.414	1.179	0.85	1.793	1.235	1.669	0.806	1.461	1.658	1.36	0.744	0.713	1.079	0.765	1.368	1.302	0.861	1.963	1.086	0.693	1.146	1.35	1.097	1.157	0.693	1.702	1.223	1.086	0.973	0.765	1.221
P51153	1.401	1.154	2.363	1.868	0.696	0.497	0.506	1.11	2.141	2.014	1.359	2.48	1.72	0.699	0.435	1.187	2.144	2.665	1.447	1.193	0.826	1.906	1.315	1.725	0.774	1.442	1.81	1.408	0.744	0.665	1.112	0.741	1.332	1.308	0.869	2.089	1.118	0.713	1.191	1.549	1.176	1.187	0.672	1.744	1.319	1.164	1.017	0.785	1.287
P26373	1.307	1.126	2.272	1.763	0.643	0.5	0.506	1.018	2.015	2.467	1.32	2.226	1.516	0.768	0.488	1.158	2.182	2.392	1.644	1.306	0.91	2.08	1.365	1.688	0.789	1.522	1.651	1.453	0.83	0.727	1.161	0.86	1.518	1.485	0.967	2.192	1.119	0.688	1.301	1.552	1.203	1.294	0.727	1.916	1.265	1.241	1.082	0.813	1.384
Q6PI48	1.283	1.064	2.114	1.636	0.667	0.491	0.548	0.95	1.858	1.937	1.238	2.073	1.437	0.692	0.45	0.946	1.736	2.334	1.376	1.209	0.787	1.792	1.3	1.577	0.801	1.427	1.519	1.334	0.764	0.689	1.014	0.779	1.295	1.21	0.87	2.042	1.033	0.671	1.17	1.412	1.101	1.126	0.717	1.604	1.201	1.089	1.005	0.702	1.272
Q8WZA9	1.415	1.231	2.243	1.618	0.707	0.707	0.783	1.047	2.066	3.014	1.244	2.064	1.605	0.945	0.525	1.107	1.794	2.237	1.668	1.167	0.897	1.884	1.305	1.632	0.735	1.402	1.573	1.615	0.856	0.743	1.194	1.072	1.743	1.776	1.167	2.297	1.26	0.801	1.473	1.769	1.353	1.623	0.811	2.422	1.605	1.21	1.096	0.806	1.414
P46783	1.364	1.204	2.248	1.701	0.719	0.637	0.632	1.155	2.001	1.963	1.147	1.964	1.316	0.671	0.394	1.029	1.55	2.14	1.731	1.303	0.942	1.913	1.275	1.715	0.702	1.491	1.73	1.379	0.821	0.682	1.172	0.749	1.415	1.341	0.865	2.022	1.126	0.664	1.224	1.561	1.148	1.35	0.643	2.026	1.291	1.127	1.008	0.748	1.293
G3V0I5	1.356	1.146	2.165	1.62	0.699	0.585	0.672	1.024	2.002	2.336	1.294	2.329	1.703	0.819	0.507	1.1	2.188	2.765	1.261	1.231	0.795	1.797	1.36	1.693	0.77	1.536	1.576	1.469	0.762	0.693	1.164	0.789	1.411	1.383	0.955	2.138	1.102	0.739	1.254	1.612	1.164	1.243	0.686	1.977	1.383	1.198	1.09	0.793	1.411
A6NFX8	1.306	1.143	2.139	1.762	0.683	0.571	0.624	1.038	1.972	2.121	1.244	2.211	1.576	0.699	0.488	1	1.993	2.374	1.616	1.204	0.814	1.85	1.31	1.536	0.73	1.274	1.433	1.553	0.78	0.748	1.207	0.793	1.468	1.378	0.956	2.22	1.165	0.717	1.174	1.431	1.103	1.16	0.654	1.886	1.305	1.23	1.107	0.826	1.391
Q8IXB1	1.205	1.002	1.647	1.321	0.632	0.522	0.579	0.933	1.645	1.988	1.004	1.62	1.116	0.717	0.408	0.757	1.236	1.909	1.119	1.045	0.717	1.404	1.033	1.206	0.727	1.015	1.345	1.247	0.707	0.666	0.973	0.699	1.276	1.224	0.862	1.832	1.006	0.629	1.021	1.256	0.979	1.035	0.598	1.452	1.074	0.95	1.011	0.696	1.092
Q02750	1.271	1.003	1.975	1.41	0.533	0.491	0.569	1.163	1.764	2.085	1.115	1.967	1.289	0.63	0.476	0.799	1.909	1.993	1.657	1.213	0.788	1.859	1.237	1.572	0.737	1.365	1.51	1.308	0.725	0.657	0.982	0.722	1.285	1.165	0.817	1.937	1.1	0.706	1.218	1.463	1.115	1.28	0.702	2.008	1.331	1.185	1.015	0.784	1.26
O14776	1.357	1.166	2.343	1.808	0.742	0.561	0.535	1.005	2.175	1.671	1.339	2.312	1.606	0.65	0.433	1.153	2.112	2.612	1.43	1.266	0.895	2.06	1.44	1.768	0.868	1.618	1.692	1.388	0.837	0.676	1.105	0.812	1.622	1.508	0.996	2.053	1.164	0.732	1.308	1.543	1.238	1.262	0.773	1.945	1.379	1.189	1.074	0.787	1.383
Q12769	1.364	1.115	2.384	1.803	0.711	0.587	0.6	1.073	2.17	1.856	1.319	2.234	1.654	0.678	0.453	1.051	1.902	2.601	1.161	1.251	0.872	1.813	1.363	1.725	0.927	1.444	1.722	1.334	0.753	0.671	1.088	0.829	1.342	1.248	0.841	2.126	1.046	0.743	1.011	1.366	1.016	1.148	0.748	1.451	1.35	1.142	1.081	0.775	1.237
A0A024RCR6	1.38	1.269	2.26	1.711	0.79	0.716	0.687	1.096	2.021	2.454	1.199	1.817	1.447	0.859	0.542	1.013	1.667	2.094	1.61	1.121	0.831	1.753	1.195	1.444	0.68	1.218	1.403	1.327	0.802	0.741	1.102	0.899	1.586	1.518	0.985	2.116	1.094	0.704	1.221	1.602	1.213	1.345	0.698	1.875	1.41	1.161	1.06	0.753	1.351
P16949	1.602	1.338	2.72	1.827	0.741	0.552	0.56	1.141	2.118	2.73	1.513	2.672	1.717	0.892	0.502	1.383	1.873	2.171	1.619	1.177	0.846	1.657	1.265	1.566	0.682	1.326	1.475	1.616	0.852	0.748	1	0.875	1.518	1.413	0.896	1.842	1.266	0.9	1.183	1.664	1.133	1.196	0.746	1.916	1.413	1.343	1.242	0.951	1.478
Q96M27	1.253	1.198	2.234	1.706	0.663	0.504	0.449	1.006	2.009	1.985	1.175	1.961	1.451	0.651	0.47	0.893	1.862	2.263	1.462	1.125	0.821	1.809	1.264	1.428	0.738	1.224	1.665	1.423	0.829	0.705	1.158	0.91	1.493	1.393	0.913	2.066	1.157	0.674	1.119	1.561	1.096	1.078	0.633	1.403	1.353	1.121	1.038	0.736	1.207
P10599	1.33	1.125	2.324	1.837	0.668	0.472	0.571	1.01	2.035	2.006	1.362	2.307	1.597	0.694	0.476	0.924	1.997	2.447	1.444	1.261	0.78	1.783	1.303	1.568	0.741	1.226	1.419	1.431	0.771	0.667	1.122	0.74	1.262	1.214	0.782	1.957	1.051	0.704	1.11	1.435	1.042	1.031	0.588	1.547	1.219	1.164	1.098	0.716	1.248
P04222	1.395	1.316	2.249	1.723	0.859	0.746	0.786	1.02	2.316	2.654	1.252	1.985	1.368	0.915	0.58	1.009	1.778	2.347	1.691	1.217	0.945	2.033	1.235	1.724	0.823	1.479	1.583	1.367	0.815	0.73	1.155	0.801	1.607	1.561	1.033	2.412	1.136	0.763	1.334	1.49	1.147	1.278	0.764	1.885	1.45	1.285	1.199	0.908	1.47
P26583	1.526	1.171	2.392	1.8	0.716	0.544	0.615	1.08	2.055	2.76	1.349	2.252	1.578	0.811	0.502	1.027	1.969	2.358	1.567	1.224	0.914	2.107	1.278	1.713	0.766	1.464	1.695	1.558	0.815	0.693	1.214	0.886	1.535	1.481	0.954	2.056	1.151	0.737	1.217	1.564	1.15	1.255	0.679	1.909	1.351	1.126	1.024	0.714	1.253
Q15185	1.245	1.092	1.88	1.509	0.641	0.474	0.508	0.948	1.617	2.069	1.309	2.172	1.564	0.742	0.435	1.006	1.723	2.305	1.591	1.117	0.781	1.693	1.242	1.434	0.658	1.189	1.416	1.335	0.756	0.678	1.002	0.767	1.338	1.284	0.89	1.87	1.087	0.752	1.202	1.438	1.122	1.101	0.652	1.667	1.131	1.24	1.09	0.855	1.434
Q9UBQ7	1.301	1.182	2.128	1.655	0.719	0.54	0.65	1.064	2.041	2.167	1.26	2.045	1.444	0.773	0.486	1.027	1.837	2.324	1.545	1.179	0.811	1.707	1.27	1.613	0.772	1.339	1.506	1.327	0.765	0.703	1.092	0.803	1.435	1.33	0.9	2.041	0.981	0.688	1.172	1.382	1.041	1.224	0.663	1.862	1.176	1.232	1.131	0.79	1.347
Q16539	1.404	1.19	2.487	1.999	0.752	0.557	0.588	1.119	2.36	2.516	1.351	2.317	1.662	0.847	0.49	1.078	2.115	2.654	1.563	1.2	0.888	1.904	1.301	1.603	0.729	1.401	1.603	1.355	0.74	0.687	1.09	0.741	1.317	1.271	0.801	2.05	1.104	0.738	1.272	1.449	1.129	1.245	0.709	1.83	1.312	1.17	1.031	0.813	1.303
Q13217	1.332	1.067	2.079	1.536	0.638	0.453	0.422	0.885	1.72	2.05	1.238	2.055	1.389	0.585	0.43	1.015	1.95	2.22	1.519	1.175	0.8	1.85	1.265	1.474	0.679	1.292	1.578	1.277	0.695	0.616	1.003	0.739	1.21	1.129	0.777	1.812	0.98	0.642	1.067	1.257	1.018	1.074	0.63	1.612	1.158	1.087	0.96	0.744	1.228
Q9HB40	1.375	1.205	2.301	1.619	0.687	0.558	0.483	0.999	2.001	2.056	1.368	2.366	1.677	0.782	0.55	1.097	1.987	2.732	1.473	1.241	0.884	1.895	1.359	1.672	0.847	1.452	1.615	1.549	0.82	0.742	1.145	0.89	1.482	1.449	0.958	2.243	1.089	0.734	1.103	1.44	1.048	1.095	0.655	1.567	1.281	1.153	1.117	0.764	1.29
Q8N766	1.692	1.361	2.456	2.238	0.839	0.657	0.392	1.068	2.364	2.146	1.243	1.985	1.564	0.807	0.536	1.237	1.766	2.324	1.249	1.183	0.755	1.803	1.295	1.627	0.919	1.523	1.404	1.482	0.773	0.74	1.153	0.726	1.269	1.394	0.834	2.033	1.067	0.812	1.243	1.377	1.122	1.295	0.77	1.67	1.2	1.225	1.048	0.855	1.44
Q92797	1.401	1.257	2.296	1.728	0.759	0.65	0.707	1.071	2.193	2.162	1.083	1.739	1.285	0.66	0.457	0.908	1.482	2.111	1.349	1.118	0.823	1.771	1.312	1.587	0.783	1.392	1.481	1.27	0.818	0.745	1.079	0.791	1.536	1.515	0.976	2.107	1.004	0.68	1.157	1.451	1.155	1.148	0.734	1.814	1.289	1.053	1.027	0.801	1.218
P62829	1.362	1.07	2.049	1.567	0.632	0.485	0.53	0.848	1.776	1.959	1.23	2.06	1.412	0.619	0.449	0.825	1.762	2.184	1.649	1.317	0.837	1.932	1.244	1.589	0.779	1.302	1.469	1.466	0.812	0.713	1.076	0.738	1.334	1.253	0.848	1.966	1.099	0.672	1.178	1.34	0.997	1.089	0.625	1.657	1.161	1.138	1.059	0.761	1.29
O95299	1.44	1.262	2.32	1.775	0.733	0.63	0.651	1.096	2.131	2.419	1.194	2.038	1.472	0.877	0.451	0.875	1.697	2.136	1.752	1.123	0.864	1.924	1.231	1.553	0.639	1.229	1.439	1.37	0.786	0.708	1.177	0.856	1.46	1.392	0.95	2.065	1.099	0.71	1.236	1.45	1.099	1.249	0.691	1.903	1.234	1.204	1.103	0.836	1.407
Q9UGI8	1.269	1.029	1.848	1.433	0.678	0.561	0.66	0.867	1.728	2.279	1.15	1.823	1.165	0.679	0.438	0.899	1.654	2.051	1.42	1.182	0.861	1.973	1.415	1.771	0.676	1.402	1.906	1.21	0.707	0.626	1.005	0.697	1.307	1.211	0.859	1.782	0.963	0.675	1.05	1.255	1.011	1.116	0.629	1.593	1.155	1.344	0.932	1.003	1.364
P30480	1.414	1.206	2.135	1.692	0.764	0.598	0.618	1.144	1.984	2.537	1.353	2.138	1.599	0.855	0.512	1.143	1.892	2.428	1.691	1.23	0.902	1.924	1.359	1.695	0.735	1.404	1.659	1.425	0.806	0.719	1.184	0.845	1.535	1.452	0.999	2.178	1.213	0.8	1.395	1.73	1.265	1.34	0.754	2.122	1.406	1.464	1.153	0.895	1.605
Q10713	1.369	1.208	2.235	1.652	0.689	0.542	0.506	0.953	1.881	2.203	1.232	2.103	1.533	0.76	0.444	0.985	1.984	2.347	1.573	1.355	0.878	2.117	1.541	1.697	0.902	1.594	1.422	1.418	0.832	0.735	1.209	0.863	1.476	1.424	1.015	2.101	1.061	0.705	1.184	1.447	1.121	1.125	0.672	1.715	1.231	1.139	1.058	0.737	1.257
Q9Y383	1.247	1.028	1.944	1.521	0.631	0.497	0.524	0.87	1.758	1.92	1.168	1.926	1.406	0.711	0.409	0.967	1.879	2.236	1.473	1.097	0.799	1.723	1.176	1.518	0.677	1.327	1.47	1.249	0.763	0.672	1.053	0.776	1.373	1.295	0.9	2.077	1.019	0.682	1.187	1.559	1.187	1.226	0.692	1.82	1.347	1.174	1.077	0.887	1.394
Q96I99	1.223	1.103	2.157	1.604	0.705	0.575	0.639	0.919	1.942	2.069	1.157	2.039	1.381	0.648	0.357	0.816	1.619	2.232	1.265	1.14	0.791	1.712	1.223	1.532	0.772	1.364	1.461	1.341	0.76	0.668	1.054	0.783	1.312	1.36	0.86	1.919	1.013	0.666	1.04	1.379	1.08	1.126	0.613	1.593	1.207	1.04	0.974	0.713	1.095
Q9BUQ8	1.107	0.958	1.877	1.449	0.609	0.509	0.588	0.781	1.734	2.12	1.161	1.894	1.351	0.738	0.45	0.971	1.722	2.16	1.44	1.141	0.753	1.786	1.211	1.542	0.724	1.278	1.505	1.225	0.676	0.664	0.973	0.713	1.208	1.175	0.818	1.844	1.169	0.78	1.216	1.465	1.129	1.22	0.755	1.683	1.369	1.074	0.99	0.864	1.205
E9PK91	1.145	0.972	1.928	1.479	0.634	0.506	0.568	0.886	1.823	1.73	1.053	1.948	1.389	0.649	0.411	0.938	1.629	2.166	1.317	1.038	0.769	1.763	1.157	1.435	0.702	1.25	1.437	1.204	0.674	0.597	0.993	0.692	1.193	1.147	0.784	1.762	0.911	0.614	1.098	1.329	1.043	1.122	0.582	1.699	1.184	1.07	0.98	0.733	1.147
Q99459	1.387	1.166	2.244	1.755	0.773	0.57	0.667	0.975	2.145	2.39	1.233	2.046	1.492	0.762	0.49	0.949	1.708	2.448	1.417	1.077	0.81	1.743	1.239	1.459	0.823	1.363	1.626	1.326	0.742	0.618	1.075	0.75	1.483	1.482	0.9	2.091	0.947	0.727	1.097	1.338	1.077	1.068	0.656	1.659	1.117	1.199	1.095	0.762	1.38
P61006	1.266	1.039	1.918	1.555	0.693	0.558	0.633	0.913	1.788	2.451	0.955	1.678	1.163	0.727	0.449	0.8	1.499	1.83	1.537	1.119	0.805	1.801	1.108	1.448	0.675	1.176	1.171	1.355	0.767	0.681	1.038	0.74	1.268	1.302	0.822	1.85	1.163	0.703	1.179	1.471	1.083	1.122	0.693	1.736	1.196	1.165	1.024	0.793	1.273
Q7Z5R6	1.413	1.177	2.229	1.719	0.711	0.5	0.579	1.031	1.99	2.286	1.394	2.425	1.695	0.77	0.49	1.168	1.976	2.649	1.541	1.258	0.89	2.002	1.384	1.745	0.831	1.474	1.721	1.472	0.83	0.725	1.148	0.834	1.426	1.408	0.905	2.134	1.14	0.72	1.238	1.461	1.105	1.232	0.729	1.832	1.253	1.195	1.082	0.813	1.329
P62979	1.32	1.093	2.377	1.94	0.665	0.506	0.585	1.049	2.139	2.379	1.201	2.231	1.585	0.757	0.419	1.145	2.03	2.189	1.729	1.147	0.818	2.148	1.263	1.609	0.696	1.405	1.689	1.433	0.795	0.682	1.098	0.773	1.435	1.536	0.924	2.174	1.063	0.677	1.187	1.58	1.095	1.164	0.704	1.821	1.304	1.193	1.13	0.797	1.346
A0A087WY55	1.278	1.147	2.232	1.745	0.649	0.563	0.609	1.064	2.106	2.04	1.193	2.069	1.416	0.661	0.446	1.189	1.975	2.263	1.567	1.255	0.824	1.999	1.339	1.7	0.733	1.338	1.686	1.427	0.797	0.717	1.168	0.837	1.459	1.407	0.924	2.228	1.049	0.665	1.153	1.541	1.083	1.067	0.588	1.635	1.299	1.192	1.052	0.785	1.387
P30487	1.421	1.281	2.606	2.072	0.746	0.684	0.66	1.267	2.537	1.543	1.404	2.812	1.711	0.5	0.382	1.62	2.91	3.001	1.596	1.118	0.849	1.983	1.342	1.871	0.686	1.383	1.877	1.486	0.889	0.792	1.392	1.01	1.858	1.698	1.313	2.45	1.277	0.791	1.431	2.033	1.443	1.554	0.763	2.455	1.791	1.151	1.168	0.841	1.498
P15586	1.408	1.252	2.418	1.89	0.763	0.597	0.625	1.175	2.339	2.06	1.4	2.456	1.781	0.727	0.539	1.236	2.263	2.795	1.406	1.256	0.861	1.93	1.425	1.744	0.856	1.543	1.828	1.389	0.773	0.664	1.183	0.78	1.342	1.306	0.937	2.138	1.12	0.726	1.221	1.528	1.183	1.276	0.682	1.715	1.395	1.216	1.1	0.764	1.352
Q08752	1.251	1.052	1.992	1.583	0.642	0.431	0.502	0.85	1.796	1.807	1.101	1.957	1.427	0.646	0.415	0.743	1.586	2.086	1.217	1.132	0.766	1.598	1.137	1.422	0.696	1.203	1.351	1.348	0.746	0.668	1.001	0.715	1.21	1.125	0.812	1.843	1.057	0.634	1.092	1.358	1.054	1.061	0.617	1.585	1.198	1.161	1.068	0.783	1.277
F8VQE1	1.441	1.228	2.192	1.729	0.695	0.541	0.559	1.006	2.129	2.417	1.391	2.169	1.638	0.751	0.458	1.016	2.129	2.727	1.695	1.226	0.933	2.147	1.309	1.775	0.755	1.561	1.965	1.476	0.775	0.677	1.032	0.827	1.506	1.372	0.95	2.113	1.26	0.756	1.291	1.672	1.263	1.396	0.752	2.198	1.459	1.359	1.212	0.894	1.531
E9PFP8	1.232	1.161	2.425	1.814	0.66	0.564	0.56	1.003	2.084	1.875	1.126	2.009	1.402	0.56	0.381	0.882	1.977	2.034	1.448	1.1	0.76	1.819	1.206	1.57	0.714	1.341	1.676	1.314	0.733	0.699	1.056	0.721	1.325	1.257	0.869	2.053	1.024	0.653	1.203	1.41	1.181	1.078	0.668	1.502	1.33	1.199	1.06	0.761	1.295
P46939	1.405	1.129	2.292	1.77	0.816	0.532	0.603	1.102	2.263	2.276	1.187	1.9	1.455	0.799	0.503	1.004	1.619	2.475	1.335	1.204	0.821	1.672	1.096	1.469	0.751	1.289	1.458	1.501	0.969	0.812	1.487	0.941	1.85	1.414	1.005	1.976	0.882	0.591	1.127	1.502	1.155	1.061	0.607	1.322	1.077	1.069	1.133	0.861	1.278
O43765	1.241	1.084	2.014	1.563	0.64	0.518	0.582	1.05	1.871	2.006	1.152	1.987	1.433	0.727	0.437	0.945	1.751	2.227	1.387	1.123	0.79	1.768	1.266	1.557	0.73	1.283	1.539	1.322	0.718	0.657	1.03	0.783	1.327	1.269	0.814	1.921	1.046	0.682	1.163	1.426	1.101	1.141	0.672	1.811	1.241	1.197	1.099	0.794	1.354
O95394	1.202	1.045	1.842	1.506	0.678	0.566	0.591	0.955	1.741	2.169	1.057	1.819	1.293	0.757	0.428	0.945	1.653	1.994	1.423	1.119	0.791	1.749	1.258	1.515	0.678	1.376	1.583	1.214	0.723	0.616	0.954	0.716	1.356	1.336	0.885	1.962	0.974	0.693	1.151	1.393	0.997	1.146	0.668	1.728	1.214	1.106	1.024	0.781	1.3
E7EM64	1.235	1.178	2.085	1.623	0.651	0.542	0.543	0.962	1.845	1.964	1.326	2.108	1.456	0.729	0.476	1.068	1.811	2.309	1.584	1.18	0.865	1.882	1.275	1.639	0.773	1.437	1.49	1.265	0.741	0.676	0.936	0.706	1.278	1.122	0.862	1.826	1.042	0.679	1.155	1.442	1.087	1.184	0.692	1.775	1.169	1.181	1.035	0.814	1.255
Q15717	1.24	1.035	2.001	1.465	0.593	0.455	0.485	0.851	1.788	2.009	1.165	1.959	1.336	0.633	0.414	0.902	1.689	2.211	1.353	1.051	0.725	1.538	1.019	1.378	0.656	1.187	1.328	1.208	0.671	0.615	0.922	0.642	1.167	1.16	0.763	1.692	1.073	0.699	1.157	1.362	1.06	1.133	0.7	1.664	1.143	1.144	1.077	0.774	1.201
Q96CM8	1.285	1.106	2.11	1.598	0.647	0.581	0.572	1.075	1.952	2.528	1.222	2.15	1.38	0.828	0.519	0.96	1.956	2.225	1.638	1.193	0.892	1.836	1.228	1.554	0.685	1.334	1.589	1.297	0.773	0.665	1.021	0.718	1.402	1.312	0.896	1.952	1.189	0.787	1.304	1.64	1.346	1.324	0.723	2.12	1.318	1.123	1.047	0.787	1.27
Q16576	1.497	1.157	2.271	1.578	0.749	0.634	0.662	0.979	1.881	2.943	0.953	1.552	1.117	0.832	0.542	0.873	1.455	1.862	1.593	1.188	0.917	2.156	1.328	1.54	0.639	1.42	1.633	1.63	0.978	0.726	1.127	0.979	1.718	1.743	1.068	2.416	1.084	0.651	1.277	1.577	1.168	1.298	0.67	2.218	1.304	1.237	1.127	0.854	1.351
P12931	1.341	1.123	2.296	1.743	0.745	0.566	0.602	1.179	2.349	1.958	1.188	2.044	1.403	0.672	0.406	0.923	1.845	2.191	1.466	1.166	0.801	1.758	1.236	1.465	0.759	1.341	1.399	1.349	0.742	0.652	1.006	0.692	1.203	1.188	0.823	1.847	1.172	0.753	1.302	1.499	1.207	1.247	0.759	1.909	1.263	1.235	1.116	0.838	1.383
Q05086	1.332	1.044	2.025	1.489	0.62	0.505	0.599	0.949	1.814	1.644	1.135	1.91	1.402	0.593	0.387	0.95	1.922	2.166	1.66	1.254	0.89	1.916	1.366	1.893	0.836	1.56	2.062	1.272	0.662	0.635	0.984	0.696	1.347	1.179	0.907	1.949	0.967	0.641	1.061	1.289	0.972	1.097	0.688	1.536	1.162	1.189	1.047	0.825	1.343
P62750	1.42	1.222	2.406	1.858	0.724	0.542	0.555	1.005	2.054	2.354	1.443	2.548	1.698	0.808	0.504	1.082	2.085	2.703	1.405	1.301	0.849	1.813	1.286	1.567	0.787	1.399	1.456	1.549	0.849	0.765	1.173	0.845	1.48	1.448	0.936	2.266	1.068	0.711	1.183	1.366	1.078	1.126	0.687	1.595	1.128	1.154	1.099	0.749	1.265
Q7Z406																			1.133	1.199	0.838	1.71	1.362	1.402	0.802	1.27	1.627	0.947	0.638	0.623	0.893	0.662	1.113	1.017	0.736	1.492	0.9	0.595	1.028	1.232	0.984	0.842	0.62	1.196	1.018	1.08	0.988	0.701	1.034
Q9NZT2	1.392	1.16	2.178	1.653	0.784	0.625	0.696	1.124	2.234	2.825	1.285	1.988	1.469	0.923	0.524	1.079	1.869	2.311	1.648	1.184	0.893	1.861	1.278	1.582	0.686	1.408	1.563	1.329	0.764	0.67	1.091	0.801	1.515	1.486	1.033	2.104	1.037	0.676	1.248	1.519	1.142	1.292	0.676	1.992	1.293	1.217	1.084	0.812	1.444
P60981	1.321	1.024	2.021	1.597	0.69	0.506	0.577	1.027	1.878	2.122	1.308	2.346	1.534	0.764	0.441	0.946	1.793	2.472	1.686	1.174	0.838	1.957	1.248	1.532	0.714	1.257	1.708	1.285	0.72	0.67	1.034	0.705	1.249	1.17	0.801	1.951	1.016	0.7	1.136	1.335	1.055	1.032	0.63	1.65	1.092	1.221	1.07	0.832	1.265
Q15154	1.344	1.156	1.996	1.521	0.742	0.631	0.652	1.04	1.877	2.488	1.038	1.355	1.165	0.765	0.46	0.878	1.314	1.651	1.346	1.119	0.791	1.72	1.201	1.553	0.774	1.317	1.397	1.311	0.908	0.774	1.279	0.906	1.567	1.549	1.049	2.2	0.99	0.665	1.031	1.463	1.034	1.16	0.599	1.61	1.152	1.241	1.089	0.899	1.39
Q8IY67	1.353	1.172	2.307	1.818	0.712	0.578	0.604	1.035	2.179	1.982	1.293	2.292	1.651	0.727	0.428	1.118	2.076	2.646	1.37	1.144	0.842	1.805	1.348	1.768	0.798	1.495	1.787	1.248	0.764	0.681	1.079	0.749	1.323	1.262	0.919	1.942	1.082	0.674	1.182	1.558	1.202	1.293	0.689	1.832	1.357	1.2	1.037	0.767	1.416
P06702	3.086	2.143	5.647	2.672	0.975	0.781	0.899	2.023	3.443	3.708	1.834	3.921	2.877	1.141	0.693	2.779	2.717	3.06	2.867	1.541	1.287	3.177	1.905	2.946	0.978	2.35	2.514	2.1	1.126	0.932	1.095	0.94	2.157	2.16	0.995	1.869	2.035	1.348	1.643	2.882	1.727	1.572	1.134	2.734	2.356	1.817	1.82	1.29	1.919
Q14739	1.3	1.027	2.035	1.568	0.671	0.509	0.558	0.895	1.833	2.103	1.105	1.781	1.318	0.687	0.428	0.915	1.658	2.022	1.507	1.153	0.809	1.83	1.21	1.484	0.677	1.303	1.476	1.372	0.771	0.68	1.048	0.801	1.37	1.301	0.894	1.903	1.07	0.65	1.151	1.388	1.053	1.153	0.64	1.755	1.198	1.113	0.981	0.759	1.273
Q32P28	1.308	1.072	2.007	1.556	0.705	0.479	0.522	0.92	1.813	2.246	1.155	1.698	1.275	0.739	0.428	1.043	1.669	1.977	1.494	1.211	0.826	1.813	1.304	1.567	0.812	1.448	1.462	1.332	0.779	0.673	1.11	0.837	1.429	1.437	0.973	2.072	1.175	0.704	1.267	1.575	1.249	1.236	0.765	1.843	1.25	1.238	1.095	0.829	1.324
P36957	1.314	1.137	2.155	1.701	0.684	0.524	0.566	0.981	1.968	2.165	1.259	2.139	1.565	0.734	0.463	1.07	1.957	2.45	1.486	1.226	0.807	1.748	1.228	1.53	0.747	1.315	1.415	1.385	0.751	0.662	1.07	0.767	1.349	1.298	0.873	2.015	1.022	0.661	1.155	1.376	1.07	1.13	0.639	1.689	1.215	1.142	1.079	0.78	1.268
P15153	1.418	1.196	2.366	1.833	0.703	0.549	0.583	1.06	2.145	2.216	1.308	2.327	1.587	0.724	0.453	1.069	2.098	2.476	1.643	1.251	0.87	2.034	1.318	1.682	0.778	1.475	1.63	1.479	0.825	0.736	1.181	0.862	1.545	1.46	0.987	2.175	1.181	0.74	1.272	1.649	1.219	1.27	0.731	1.907	1.362	1.257	1.107	0.808	1.417
O95571	1.269	1.061	2.027	1.565	0.606	0.483	0.529	0.949	1.866	2.193	1.104	1.731	1.32	0.726	0.465	0.837	1.556	2.009	1.377	1.146	0.817	1.654	1.165	1.446	0.693	1.299	1.397	1.187	0.71	0.642	0.982	0.776	1.315	1.265	0.856	1.894	1.091	0.687	1.171	1.436	1.089	1.264	0.674	1.939	1.262	1.088	1.023	0.751	1.269
Q16401	1.242	1.131	2.331	1.724	0.754	0.531	0.539	0.977	2.108	1.911	1.395	2.59	1.92	0.808	0.472	1.15	2.231	2.873	1.235	1.179	0.775	1.688	1.259	1.499	0.817	1.337	1.44	1.277	0.73	0.634	0.985	0.71	1.231	1.216	0.803	1.85	1.035	0.684	1.159	1.337	1.059	1.132	0.68	1.615	1.197	1.034	1.051	0.732	1.164
P0CG39										3.314	1.762	2.321	2.396	1.234	0.632	0.917	1.915	2.712	1.752	1.248	1.115	2.543	1.238	1.622	0.805	1.42	1.44	0.987	0.627	0.719	0.781	0.541	1.078	1.09	0.797	1.376										1.066	0.88	0.775	1.114
Q9NQG5	1.317	1.125	2.073	1.631	0.668	0.529	0.56	0.996	1.868	2.092	1.228	2.009	1.492	0.752	0.426	1.044	1.984	2.351	1.629	1.136	0.777	1.766	1.271	1.416	0.675	1.171	1.513	1.367	0.758	0.619	1.103	0.766	1.348	1.328	0.896	1.994	1.109	0.667	1.129	1.452	1.051	1.085	0.6	1.611	1.22	1.095	1.01	0.7	1.242
O75368	1.811	1.331	3.137	2.019	0.644	0.531	0.679	1.041	2.396	2.801	1.13	2.427	1.546	0.805	0.471	1.146	1.826	2.393	2.086	1.235	0.968	2.377	1.395	1.97	0.794	1.702	1.789	1.648	0.832	0.771	1.072	0.853	1.687	1.615	1.008	2.347	1.307	0.758	1.091	1.764	1.171	1.131	0.731	1.916	1.464	1.256	1.137	0.863	1.398
A0A024R4M0	1.248	1.013	1.841	1.458	0.606	0.431	0.453	0.853	1.614	1.834	1.211	2.142	1.52	0.642	0.416	0.944	1.771	2.338	1.688	1.19	0.761	1.73	1.147	1.443	0.664	1.174	1.287	1.344	0.742	0.67	0.988	0.684	1.225	1.184	0.818	1.891	1.009	0.641	1.13	1.319	1.02	1.044	0.633	1.583	1.094	1.104	1.028	0.759	1.251
Q13557	1.231	1.045	2.016	1.493	0.608	0.456	0.481	0.859	1.786	1.793	1.234	2.061	1.445	0.665	0.433	0.852	1.656	2.352	1.415	1.142	0.837	1.668	1.226	1.44	0.711	1.196	1.365	1.24	0.686	0.649	0.951	0.682	1.175	1.075	0.712	1.761	1.014	0.67	1.061	1.277	0.974	1.091	0.643	1.566	1.143	1.034	0.953	0.726	1.137
O75436	1.286	1.165	2.257	1.758	0.713	0.555	0.543	1.181	2.186	1.875	1.257	2.319	1.548	0.715	0.505	1.125	2.981	3.299	1.39	1.199	0.851	1.802	1.261	1.594	0.813	2.261	2.677	1.33	0.804	0.717	1.126	0.825	1.472	1.463	1.046	2.359	1.062	0.679	1.193	1.477	1.17	1.217	0.694	2.401	1.863	1.06	0.964	0.789	1.183
Q7L0Y3	1.34	1.128	2.27	1.779	0.696	0.502	0.758	1.061	2.2	1.915	1.231	1.962	1.433	0.711	0.47	0.921	1.805	2.338	1.481	1.158	0.847	1.73	1.193	1.522	0.767	1.305	1.303	1.337	0.774	0.73	1.069	0.798	1.346	1.296	0.855	2.045	1.013	0.839	1.161	1.319	1.093	1.243	0.707	1.599	1.315	1.172	1.042	0.813	1.306
J3KR97	1.465	1.295	2.74	2.046	0.762	0.617	0.652	1.134	2.54	1.925	1.461	2.623	1.922	0.78	0.551	1.006	2.461	2.987	1.428	1.055	0.657	1.617	1.13	1.224	0.686	1.106	1.101	1.382	0.817	0.754	1.262	0.748	1.31	1.284	0.894	2.16	0.999	0.61	1.081	1.239	1	0.892	0.615	1.129	1.23	1.077	1.073	0.79	1.242
Q5JWF2	1.259	1.024	1.75	1.495	0.656	0.517	0.464	1.026	1.682	2.374	1.135	1.902	1.36	0.849	0.521	0.926	1.661	2.082	1.195	1.035	0.714	1.534	1.107	1.312	0.716	1.17	1.309	1.236	0.715	0.677	0.909	0.655	1.072	1.003	0.751	1.714	1.195	0.715	1.111	1.365	1.132	1.034	0.65	1.357	1.197	1.039	0.956	0.737	1.233
E9PFH4	1.303	1.225	2.358	1.79	0.653	0.464	0.431	0.992	1.971	1.824	1.049	1.866	1.298	0.598	0.365	0.867	1.516	2.031	1.229	1.076	0.751	1.537	1.203	1.309	0.722	1.73	1.185	1.414	0.814	0.747	1.123	0.833	1.321	1.307	0.909	2.003	1.105	0.703	1.122	1.379	1.077	1.136	0.685	1.565	1.229	1.122	1.009	0.753	1.248
Q9UIJ7	1.414	1.225	2.486	1.797	0.751	0.632	0.494	1.175	2.15	1.992	1.294	2.265	1.546	0.742	0.486	1.104	1.791	2.151	1.477	1.158	0.85	1.854	1.36	1.615	0.771	1.431	1.543	1.304	0.818	0.71	0.932	0.801	1.395	1.317	0.846	1.804	1.151	0.757	1.259	1.578	1.267	1.198	0.756	1.835	1.346	1.139	1.082	0.844	1.263
Q9UI26	1.239	1.169	2.444	1.823	0.635	0.581	0.591	0.996	2.277	1.887	1.242	2.163	1.56	0.846	0.505	0.905	1.831	2.363	1.571	1.249	0.856	2.079	1.364	1.648	0.753	1.361	1.628	1.414	0.809	0.693	1.091	0.859	1.26	1.289	0.869	2.103	1.111	0.69	1.202	1.523	1.102	1.276	0.768	1.567	1.336	1.109	0.978	0.677	1.079
Q9NRV9	1.364	1.216	2.275	1.779	0.748	0.554	0.601	1.163	2.107	2.418	1.248	1.919	1.385	0.737	0.422	1.056	1.773	2.207	1.697	1.25	0.937	2.044	1.394	1.8	0.771	1.533	1.81	1.302	0.739	0.658	1.041	0.771	1.478	1.354	0.931	2.121	1.033	0.637	1.192	1.452	1.12	1.224	0.572	1.817	1.2	1.183	1.017	0.745	1.346
P54725	1.323	1.128	2.066	1.617	0.675	0.561	0.702	1.028	1.982	2.8	1.395	2.257	1.551	0.998	0.553	1.24	2.036	2.475	1.71	1.143	0.815	1.857	1.238	1.576	0.603	1.266	1.571	1.577	0.796	0.647	1.192	0.759	1.341	1.255	0.831	2.231	1.058	0.618	1.138	1.322	0.926	1.038	0.553	1.666	1.21	1.202	1.094	0.774	1.314
P42345	1.37	1.079	2.213	1.823	0.642	0.503	0.549	0.963	2.014	1.893	1.312	2.148	1.666	0.746	0.522	1.085	1.909	2.668	1.152	1.254	0.767	1.693	1.116	1.395	0.861	1.213	1.318	1.146	0.671	0.543	0.963	0.8	1.146	1.226	0.79	1.852	0.931	0.552	0.991	1.109	0.907	0.808	0.561	1.363	1.019	1.072	1.011	0.741	1.221
Q9NTJ3	1.321	1.133	2.22	1.681	0.689	0.584	0.637	0.982	2.016	2.172	1.091	1.936	1.34	0.744	0.423	0.95	1.741	2.215	1.25	1.181	0.809	1.85	1.3	1.622	0.858	1.445	1.804	1.276	0.714	0.687	1.025	0.723	1.364	1.282	0.86	1.889	1.059	0.691	1.222	1.517	1.151	1.373	0.839	1.738	1.428	1.272	1.065	0.906	1.317
P21912	1.738	1.459	3.13	2.09	0.858	0.633	0.696	1.306	2.582	2.595	1.23	2.234	1.515	0.887	0.486	1.192	1.954	2.129	1.718	1.133	0.892	1.981	1.394	1.723	0.703	1.531	1.641	1.435	0.819	0.737	1.019	0.868	1.562	1.484	0.953	2.113	1.271	0.859	1.288	1.858	1.364	1.379	0.76	2.11	1.475	1.34	1.215	0.864	1.568
Q9Y224	1.553	1.359	3.016	1.874	0.676	0.567	0.569	1.127	2.557	1.986	1.323	2.699	1.878	0.703	0.458	1.233	1.966	2.671	1.271	1.074	0.839	1.746	1.3	1.727	0.897	1.447	1.555	1.555	0.823	0.733	0.949	0.834	1.394	1.389	0.91	1.931	1.244	0.678	1.009	1.607	1.147	0.988	0.931	1.57	1.405	1.225	1.148	0.846	1.44
P30479
Q9H6T3	1.346	1.158	2.174	1.708	0.661	0.531	0.526	1.058	1.982	2.065	1.352	2.399	1.668	0.703	0.51	1.092	2.007	2.582	1.451	1.228	0.892	1.824	1.291	1.676	0.778	1.324	1.61	1.4	0.863	0.727	1.117	0.782	1.308	1.363	0.897	2.098	1.089	0.67	1.279	1.3	1.14	1.227	0.793	1.481	1.222	1.335	1.116	0.857	1.465
P01111	1.347	1.135	2.189	1.739	0.678	0.56	0.566	0.956	2.063	1.838	1.18	1.989	1.496	0.68	0.447	0.969	1.933	2.398	1.124	1.307	0.916	1.976	1.512	1.686	0.93	1.611	1.672	1.376	0.772	0.684	1.094	0.774	1.318	1.346	0.863	2.088	1.008	0.704	1.137	1.405	1.059	1.157	0.702	1.562	1.218	1.061	1.028	0.765	1.264
Q14318	1.375	1.169	2.158	1.682	0.703	0.545	0.558	0.917	1.953	2.362	1.299	2.175	1.439	0.753	0.476	0.966	1.796	2.255	1.191	1.176	0.826	1.745	1.329	1.574	0.79	1.434	1.468	1.363	0.793	0.714	1.1	0.845	1.522	1.391	0.965	2.027	1.239	0.765	1.295	1.678	1.288	1.409	0.86	2.037	1.384	1.104	0.902	0.778	1.324
Q6L8Q7	1.323	1.119	2.257	1.721	0.727	0.516	0.538	0.987	1.983	1.939	1.292	2.165	1.656	0.694	0.466	0.991	2.059	2.567	1.438	1.158	0.864	1.729	1.248	1.485	0.745	1.393	1.422	1.326	0.756	0.675	1.137	0.844	1.434	1.41	0.904	2.079	1.004	0.699	1.186	1.36	1.127	1.162	0.704	1.763	1.264	1.131	1.009	0.76	1.3
O14579	1.306	1.186	2.618	2.181	0.666	0.531	0.458	1.214	2.416	1.764	1.243	2.313	1.55	0.64	0.368	1.068	2.082	2.475	1.504	1.152	0.84	1.893	1.279	1.6	0.729	1.334	1.613	1.312	0.754	0.665	1.07	0.763	1.342	1.227	0.838	1.963	1.018	0.661	1.19	1.421	1.132	1.106	0.685	1.665	1.232	1.167	1.033	0.772	1.318
Q9NR45	1.338	1.121	2.199	1.749	0.678	0.554	0.588	1.021	2.005	2.389	1.167	2.032	1.384	0.839	0.451	0.987	1.796	2.18	1.54	1.113	0.803	1.792	1.253	1.496	0.694	1.206	1.405	1.315	0.698	0.617	1.008	0.69	1.165	1.135	0.793	1.833	0.988	0.625	1.067	1.293	0.961	0.998	0.568	1.5	1.093	1.198	1.028	0.801	1.231
Q3ZCQ8	1.33	1.132	2.18	1.697	0.709	0.559	0.585	0.972	1.956	2.034	1.367	2.185	1.595	0.759	0.502	1.079	1.998	2.602	1.83	1.236	0.881	1.908	1.358	1.658	0.785	1.363	1.434	1.306	0.756	0.719	1.093	0.819	1.373	1.3	0.88	2.069	1.107	0.683	1.252	1.545	1.113	1.278	0.743	1.947	1.313	1.199	1.119	0.837	1.341
P08237	1.388	1.244	2.562	1.902	0.722	0.604	0.659	1.083	2.264	2.111	1.422	2.406	1.636	0.764	0.522	0.896	1.924	2.732										1.428	0.944	0.588	1.435	0.951	1.468	1.159	0.945	2.076	1.285	0.715	1.017	1.595	1.016	1.129	0.617	1.487	1.509	1.197	1.145	0.928	1.336
P51114	1.2	1.007	1.75	1.374	0.682	0.566	0.579	0.888	1.701	2.339	1.14	1.877	1.304	0.763	0.451	1.008	1.728	2.13	1.322	1.131	0.967	1.964	1.21	1.654	0.804	1.421	1.614	1.271	0.784	0.722	1.061	0.842	1.525	1.426	1.115	1.898	1.304	0.76	1.536	1.695	1.26	1.4	0.814	2.114	1.361	1.099	1.032	0.808	1.29
O15294	1.409	1.191	2.236	1.649	0.777	0.616	0.674	0.964	2.066	2.55	1.257	2.117	1.484	0.911	0.559	1.1	1.852	2.45	1.336	1.209	0.855	1.833	1.296	1.598	0.818	1.41	1.429	1.39	0.766	0.815	1.073	0.796	1.568	1.426	1.014	2.107	1.083	0.716	1.174	1.376	1.13	1.161	0.679	1.638	1.277	1.171	1.078	0.794	1.318
P31942	1.271	0.992	2.013	1.537	0.679	0.509	0.551	0.901	1.844	2.035	1.116	1.905	1.331	0.636	0.425	1.021	1.606	2.098	1.443	1.08	0.784	1.702	1.064	1.473	0.661	1.251	1.301	1.218	0.721	0.631	1.009	0.691	1.189	1.166	0.816	1.804	1.025	0.646	1.159	1.401	1.117	1.153	0.711	1.669	1.101	1.182	1.107	0.848	1.33
Q9NP72	1.349	1.207	2.291	1.712	0.728	0.537	0.596	0.992	2.065	2.767	1.543	2.656	1.91	0.911	0.512	1.232	2.324	2.969	1.381	1.2	0.851	1.887	1.37	1.671	0.796	1.481	1.622	1.331	0.769	0.662	1.095	0.721	1.198	1.157	0.786	2.02	1.097	0.677	1.218	1.475	1.19	1.184	0.733	1.755	1.305	1.22	1.096	0.815	1.351
E7EW49	1.364	1.154	2.192	1.609	0.763	0.629	0.651	1.023	2.02	2.219	1.19	2.098	1.424	0.748	0.479	1.108	1.771	2.277	1.453	1.202	0.839	1.866	1.435	1.668	0.76	1.456	1.461	1.248	0.717	0.685	1.106	0.804	1.497	1.328	0.983	2.139	0.987	0.715	1.144	1.447	1.206	1.116	0.7	1.557	1.295	1.176	1.099	0.751	1.369
Q58FF6										2.434	1.306	2.112	1.488	0.698	0.594	1.319	1.725	2.929																			1.028	0.571	1.27	1.2	1.029	1.246	0.61	1.822	1.44
O95336	1.377	1.259	2.241	1.676	0.787	0.641	0.635	1.162	2.089	1.683	1.259	2.203	1.684	0.672	0.484	1.168	1.964	2.241	1.491	1.235	0.865	1.851	1.371	1.676	0.764	1.391	1.494	1.444	0.836	0.742	1.164	0.886	1.472	1.504	0.99	2.129	1.109	0.743	1.194	1.492	1.092	1.046	0.629	1.628	1.25	1.203	1.202	0.895	1.42
Q9UKY7	1.549	0.961	2.368	1.587	0.529	0.48	0.621	1.4	1.95	3.51	1.703	2.573	1.624	1.099	0.556	1.443	2.537	2.438	2.054	1.25	0.944	2.194	1.437	1.908	0.682	1.477	2.038	1.544	0.725	0.734	1.147	0.887	1.596	1.524	0.959	2.186	1.334	0.764	1.392	2.023	1.369	1.344	0.71	2.303	1.653	1.316	1.131	0.941	1.524
A0A087WUC6	1.32	1.102	2.097	1.63	0.664	0.499	0.511	0.957	1.901	1.903	1.143	1.945	1.383	0.68	0.427	0.838	1.622	2.159	1.504	1.177	0.832	1.875	1.268	1.532	0.75	1.316	1.52	1.339	0.718	0.66	1.078	0.782	1.263	1.266	0.845	1.96	1.034	0.651	1.127	1.37	1.002	1.068	0.628	1.644	1.162	1.111	1.012	0.771	1.22
Q13151	1.286	0.993	1.883	1.385	0.615	0.486	0.575	0.864	1.696	2.288	1.145	1.813	1.262	0.747	0.464	0.908	1.495	2.002	1.547	1.131	0.8	1.828	1.188	1.51	0.688	1.327	1.477	1.299	0.773	0.657	1.042	0.711	1.259	1.206	0.792	1.874	1.087	0.711	1.247	1.45	1.231	1.261	0.749	2.027	1.269	1.167	1.095	0.831	1.331
O00505	1.217	1.084	1.946	1.555	0.657	0.516	0.577	0.931	1.733	2.292	1.212	1.944	1.472	0.778	0.556	0.89	1.658	2.295	1.706	1.168	0.771	1.497	1.164	1.342	0.619	1.102	1.253	1.273	0.777	0.711	1.068	0.759	1.42	1.465	0.913	2.068	0.974	0.742	1.011	1.181	0.928	0.925	0.567	1.514	1.152	1.227	1.056	0.83	1.306
Q9UNP9	1.323	1.191	2.391	1.967	0.721	0.584	0.486	1.1	2.129	2.157	1.208	1.983	1.422	0.734	0.448	0.956	1.845	2.178	1.377	1.148	0.847	1.877	1.386	1.64	0.728	1.444	1.605	1.372	0.778	0.668	1.151	0.835	1.54	1.505	0.981	2.063	1.104	0.708	1.173	1.418	1.139	1.254	0.778	1.79	1.309	1.177	1.123	0.829	1.428
O95831	1.356	1.132	2.039	1.587	0.697	0.586	0.68	1.001	1.911	2.531	1.186	1.85	1.417	0.851	0.462	0.956	1.571	2.157	1.868	1.195	0.877	1.894	1.301	1.516	0.616	1.205	1.423	1.346	0.734	0.607	1.006	0.731	1.199	1.166	0.765	1.903	1.126	0.689	1.241	1.491	1.126	1.158	0.637	1.867	1.249	1.153	1.023	0.762	1.292
P53007	1.276	1.066	1.951	1.505	0.614	0.488	0.565	0.832	1.693	2.308	1.2	2.069	1.459	0.773	0.467	0.952	1.765	2.301	1.581	1.159	0.838	1.884	1.197	1.554	0.717	1.249	1.453	1.348	0.755	0.679	1.087	0.759	1.321	1.3	0.841	2.064	1.071	0.723	1.224	1.437	1.07	1.219	0.685	1.855	1.243	1.132	1.02	0.764	1.269
P54709	1.372	1.141	2.279	1.726	0.647	0.48	0.511	1.049	1.985	1.738	1.174	2.093	1.485	0.674	0.391	1.007	1.881	2.242	1.505	1.187	0.811	1.736	1.26	1.543	0.683	1.305	1.373	1.411	0.791	0.674	1.071	0.8	1.425	1.335	0.88	2.042	1.018	0.656	1.054	1.341	1.008	1.058	0.558	1.718	1.147	1.063	0.982	0.615	1.162
P59998	1.339	1.166	2.105	1.7	0.685	0.515	0.545	1.012	1.915	1.976	1.242	2.063	1.414	0.676	0.426	1.004	1.873	2.238	1.455	1.151	0.81	1.766	1.224	1.453	0.753	1.315	1.387	1.37	0.761	0.671	1.053	0.764	1.29	1.259	0.875	1.884	1.052	0.667	1.158	1.365	1.076	1.169	0.648	1.694	1.155	1.141	1.005	0.761	1.18
B1ALA9	1.383	1.158	2.181	1.654	0.743	0.585	0.591	0.963	2.021	2.043	1.156	1.898	1.38	0.737	0.479	0.959	1.733	2.223	1.395	1.219	0.855	1.863	1.337	1.574	0.811	1.414	1.52	1.342	0.794	0.687	1.025	0.766	1.356	1.328	0.885	1.939	1.009	0.672	1.174	1.383	1.115	1.125	0.712	1.711	1.187	1.178	1.054	0.765	1.249
Q8N3C0	1.35	1.177	2.346	1.782	0.762	0.687	0.769	1.115	2.311	1.22	1.474	2.68	1.806	0.529	0.453	1.027	2.237	3.034	1.415	1.345	0.871	1.9	1.43	1.708	1.047	1.564	1.626	1.419	0.872	0.728	1.107	0.868	1.556	1.574	1.079	2.186	1.073	0.699	1.16	1.379	1.125	1.1	0.769	1.638	1.282	1.173	1.072	0.845	1.447
Q9HCU5	1.227	1.097	1.84	1.418	0.676	0.577	0.565	0.87	1.742	2.112	1.227	2.018	1.51	0.68	0.451	1.009	1.89	2.432	1.28	1.39	0.882	1.753	1.476	1.471	0.979	1.903	1.37	1.374	0.742	0.752	1.06	0.791	1.493	1.374	1.043	2.066	1.06	0.71	1.219	1.391	1.12	1.267	0.756	1.953	1.295	1.128	1.046	0.785	1.238
Q99880	0.829	0.92	1.336	1.215	0.514	0.422	0.545	0.85	1.703	2.325	1.2	2.004	1.442	0.988	0.57	0.855	1.383	2.376										1.206	0.823	0.704	1.017	0.922	1.439	1.489	0.951	2.245
P49720	1.215	1	1.9	1.498	0.644	0.471	0.506	0.872	1.693	1.876	1.305	2.169	1.495	0.62	0.44	0.866	1.776	2.311	1.431	1.154	0.774	1.761	1.218	1.49	0.711	1.223	1.297	1.325	0.753	0.713	1.034	0.727	1.361	1.306	0.908	1.881	0.987	0.629	1.046	1.266	0.981	0.961	0.616	1.385	1.089	1.151	1.008	0.802	1.265
Q9H3P7	1.341	1.133	2.153	1.676	0.809	0.67	0.692	1.032	1.995	2.427	1.294	2.211	1.622	0.831	0.498	1.108	2.132	2.636	1.557	1.255	0.945	2.058	1.351	1.757	0.823	1.545	1.814	1.373	0.78	0.694	1.074	0.858	1.508	1.448	0.985	2.133	1.06	0.702	1.255	1.573	1.197	1.248	0.714	1.883	1.277	1.155	1.048	0.782	1.305
Q7Z4V5	1.235	1.078	1.986	1.527	0.68	0.52	0.563	0.926	1.848	1.969	1.121	1.992	1.498	0.714	0.414	0.918	1.6	2.36	1.356	1.119	0.847	1.807	1.245	1.637	0.785	1.368	1.596	1.299	0.77	0.685	0.979	0.776	1.378	1.29	0.884	1.954	1.027	0.687	1.129	1.363	1.062	1.15	0.685	1.768	1.235	1.172	1.099	0.823	1.403
Q5ZPR3	1.378	1.176	1.949	1.463	0.71	0.619	0.669	1.001	1.953	2.556	1.084	1.748	1.316	0.875	0.475	0.969	1.537	2.068	1.587	1.182	0.859	1.933	1.262	1.658	0.799	1.371	1.544	1.236	0.732	0.621	1.024	0.818	1.426	1.425	0.893	1.958	1.078	0.717	1.239	1.559	1.192	1.301	0.677	2.016	1.336	1.295	1.17	0.828	1.524
Q5QNW6	1.543	1.666	3.292	3.498	1.007	0.811	1.051	1.708	3.406	1.928	1.335	2.688	1.986	0.807	0.561	1.441	3.671	3.147	1.921	1.719	1.148	3.702	2.353	2.338	1.082	2.493	2.585	1.521	1.038	0.873	1.329	1.148	2.131	2.159	1.318	2.86	1.618	0.813	1.708	2.491	1.95	1.975	1.303	2.989	1.869	1.385	1.407	0.939	1.761
Q92769	1.329	1.107	2.178	1.734	0.667	0.488	0.598	0.887	1.903	2.336	1.266	2.228	1.511	0.796	0.474	0.988	1.673	2.372	1.509	1.113	0.778	1.723	1.191	1.49	0.644	1.227	1.342	1.378	0.741	0.706	1.04	0.725	1.273	1.233	0.79	1.94	1.1	0.72	1.202	1.457	1.054	1.155	0.675	1.798	1.22	1.106	0.954	0.713	1.204
E9PC62	1.319	1.087	2.187	1.684	0.663	0.529	0.572	1.035	2.002	1.879	1.282	2.251	1.627	0.716	0.467	1.196	2.162	2.523	1.313	1.192	0.9	1.973	1.383	1.864	0.811	1.483	1.845	1.347	0.804	0.689	1.098	0.841	1.675	1.535	1.056	2.269	1.055	0.674	1.229	1.504	1.195	1.229	0.752	1.856	1.403	1.114	1.039	0.769	1.273
J3QQ67	1.333	1.186	2.367	1.886	0.742	0.53	0.614	0.952	2.108	2.35	1.283	2.35	1.799	0.808	0.455	1.002	1.842	2.726	1.773	1.25	0.839	1.867	1.218	1.529	0.649	1.222	1.475	1.438	0.804	0.726	1.087	0.755	1.372	1.283	0.867	2.089	1.049	0.679	1.17	1.449	1.051	1.086	0.622	1.698	1.17	1.136	1.027	0.765	1.223
Q8TDW0	1.285	1.063	2.111	1.552	0.651	0.486	0.453	0.896	1.807	2.111	1.298	2.176	1.53	0.827	0.515	0.991	1.959	2.421	1.254	1.178	0.795	1.73	1.259	1.627	0.853	1.341	1.434	1.254	0.73	0.699	1.001	0.751	1.353	1.238	0.883	1.971	1.034	0.694	1.219	1.488	1.135	1.26	0.703	1.681	1.259	1.204	1.157	0.844	1.349
P22307	1.561	1.174	2.711	1.744	0.644	0.463	0.508	0.92	1.834	2.334	1.152	2.305	1.706	0.663	0.366	1.015	1.493	2.029	1.779	1.08	0.832	2.271	1.186	1.709	0.672	1.498	1.651	1.562	0.817	0.749	0.938	0.682	1.378	1.384	0.764	1.712	1.281	0.704	0.996	1.651	0.948	1.048	0.754	1.629	1.293	1.139	1.064	0.787	1.15
P50452	1.47	1.401	2.864	2.224	0.893	0.616	0.687	1.376	2.708	1.745	1.566	2.751	1.901	0.636	0.415	1.316	2.538	3.102	1.37	1.355	0.942	2.133	1.404	1.9	0.816	1.73	1.95	1.431	0.829	0.727	1.138	0.797	1.478	1.41	1.002	2.097	1.054	0.672	1.205	1.413	1.113	1.204	0.699	1.663	1.333	1.206	1.064	0.809	1.387
P39019	1.544	1.21	2.509	1.647	0.73	0.541	0.582	0.945	1.935	2.326	1.404	2.391	1.603	0.88	0.512	1.069	1.638	2.218	1.934	1.101	0.862	1.794	1.283	1.56	0.698	1.23	1.467	1.507	0.808	0.753	0.981	0.749	1.269	1.19	0.742	1.709	1.314	0.863	1.209	1.612	1.142	1.079	0.683	1.757	1.261	1.383	1.232	0.936	1.452
Q15293	1.332	1.152	2.217	1.71	0.687	0.593	0.626	1.067	2.013	2.127	1.24	2.159	1.562	0.798	0.44	0.995	1.785	2.338	1.542	1.152	0.833	1.743	1.265	1.528	0.71	1.274	1.454	1.365	0.764	0.68	1.032	0.811	1.389	1.327	0.907	2.035	0.99	0.68	1.115	1.273	1.033	1.108	0.631	1.739	1.133	1.111	1.043	0.811	1.306
Q9NPH2	1.526	1.401	2.58	2.069	0.868	0.632	0.668	1.134	2.482	2.49	1.445	2.277	1.647	0.884	0.61	1.132	1.872	2.536	1.604	1.427	1.001	2.485	1.575	1.96	0.958	1.83	1.755	1.719	1.015	0.876	1.384	0.961	1.673	1.687	1.107	2.474	1.241	0.829	1.391	1.583	1.271	1.25	0.772	1.875	1.405	1.241	1.179	0.813	1.455
O95757	1.357	1.217	2.474	1.818	0.707	0.553	0.453	1.082	2.288	2.039	1.329	2.097	1.416	0.598	0.402	0.944	2.002	2.127	1.004	1.312	0.838	1.675	1.32	1.709	0.974	1.619	1.76	0.77	0.458	0.46	0.696	0.644	0.887	1.2	0.689	1.173	0.984	0.74	1.209	1.194	1.13	1.204	0.715	1.734	1.155	1.161	1.019	0.906	1.338
Q9Y6D6	1.338	1.17	2.192	1.706	0.659	0.448	0.458	0.957	1.92	1.636	1.497	2.722	1.892	0.626	0.505	1.213	2.35	2.988	1.155	1.255	0.805	2.012	1.307	1.811	1.197	1.612	2.01	1.31	0.819	0.728	1.05	0.863	1.449	1.398	0.938	1.968	1.092	0.797	1.242	1.445	1.225	1.201	1.034	1.549	2.147	1.251	1.101	0.819	1.239
P63208	1.212	1.036	1.983	1.528	0.634	0.521	0.53	1.082	1.824	2.111	1.252	2.191	1.567	0.826	0.442	0.958	1.737	2.401	1.513	1.08	0.784	1.845	1.235	1.487	0.629	1.214	1.553	1.355	0.705	0.594	1.01	0.728	1.354	1.278	0.803	1.989	1.119	0.726	1.168	1.472	1.06	1.066	0.616	1.725	1.259	1.251	1.088	0.811	1.521
A0A0G2JHC2	1.304	1.116	1.976	1.588	0.715	0.641	0.605	1.087	2.047	2.618	1.119	1.584	1.096	0.821	0.467	1.05	1.62	1.824	1.656	1.233	0.886	1.904	1.363	1.61	0.75	1.423	1.48	1.408	0.798	0.669	1.069	0.793	1.477	1.434	0.926	1.972	1.087	0.734	1.222	1.466	1.167	1.323	0.703	1.935	1.318	1.346	1.127	0.959	1.614
Q9UNH7	1.305	1.086	2.175	1.648	0.712	0.54	0.584	0.973	1.914	2.13	1.287	2.198	1.524	0.749	0.459	1.065	1.897	2.428	1.609	1.183	0.839	1.83	1.295	1.591	0.747	1.372	1.576	1.366	0.778	0.693	1.053	0.788	1.337	1.281	0.9	1.999	1	0.669	1.097	1.344	1.004	1.106	0.628	1.64	1.151	1.074	1.03	0.756	1.199
P45973	1.263	1.143	2.296	1.706	0.652	0.471	0.522	0.959	1.894	2.012	1.318	2.457	1.57	0.71	0.412	1.012	1.918	2.507	1.46	1.091	0.723	1.668	1.24	1.339	0.586	1.196	1.272	1.278	0.713	0.624	1.043	0.755	1.263	1.299	0.78	1.963	1.148	0.599	1.153	1.534	0.988	1.01	0.659	1.966	1.258	1.299	1.102	0.683	1.443
Q8N3U4	1.226	1.082	2.238	1.69	0.649	0.488	0.517	1.01	2.013	1.56	1.608	3.09	2.24	0.594	0.48	1.255	2.909	3.541	1.146	1.188	0.721	1.627	1.286	1.416	0.819	1.4	1.545	1.241	0.731	0.652	0.978	0.758	1.398	1.319	0.909	1.918	1.031	0.643	1.13	1.44	1.078	1.038	0.696	1.528	1.255	1.09	0.989	0.691	1.312
Q9H4A6	1.408	1.286	2.724	2.054	0.753	0.641	0.69	1.271	2.655	2.096	1.298	2.228	1.616	0.784	0.458	0.94	1.991	2.671	1.245	1.174	0.881	1.911	1.261	1.702	0.849	1.46	1.423	1.373	0.833	0.752	1.206	0.92	1.655	1.63	1.22	2.469	1.016	0.659	1.153	1.595	1.012	1.089	0.603	1.879	1.216	1.104	1.018	0.754	1.307
Q5JRX3	1.252	1.118	2.182	1.733	0.667	0.494	0.5	1.071	2.069	2.42	1.175	1.97	1.416	0.781	0.491	0.899	1.723	2.189	1.325	1.24	0.876	1.993	1.376	1.709	0.87	1.542	1.706	1.371	0.777	0.656	1.082	0.816	1.431	1.407	0.951	2.088	1.141	0.737	1.327	1.614	1.233	1.65	0.822	2.189	1.658	1.111	1.019	0.805	1.324
O75477	1.347	1.077	2.309	1.761	0.658	0.552	0.642	1.143	2.089	2.344	1.376	2.512	1.586	0.854	0.508	1.155	2.073	2.763	0.811	1.32	0.807	1.741	1.552	1.929	1.014	1.389	1.768	1.335	0.885	0.784	1.165	0.862	1.573	1.512	1.029	2.23	0.912	0.852	0.967	1.307	1.134	1.315	0.769	1.42	1.444	1.25	1.116	0.88	1.507
Q68EM7	1.421	1.228	2.391	1.844	0.715	0.578	0.586	1.063	2.175	2.118	1.196	2.196	1.541	0.799	0.43	1.08	2.017	2.426	1.265	1.07	0.715	1.562	1.232	1.478	0.752	1.118	1.333	1.409	0.781	0.696	1.164	0.844	1.448	1.435	0.92	2.104	1.018	0.635	1.058	1.433	1.095	1.117	0.642	1.785	1.282	1.163	0.996	0.759	1.262
P34910	1.395	1.187	2.132	1.742	0.739	0.564	0.609	1.003	2.08	2.316	1.224	2.125	1.574	0.763	0.463	0.952	1.763	2.356	1.441	1.138	0.832	1.809	1.219	1.497	0.702	1.169	1.427	1.64	0.806	0.71	1.261	0.858	1.269	1.31	0.89	2.12	0.973	0.62	1.017	1.245	0.947	0.948	0.532	1.37	1.087	1.086	1.002	0.72	1.264
Q14141	1.515	1.348	2.117	1.725	0.723	0.434	0.433	1.032	1.72	2.078	1.277	1.842	1.219	0.742	0.456	1.061	1.727	2.054										1.179	0.812	0.699	0.812	0.874	1.231	1.334	0.82	1.723	1.06	0.766	1.323	1.505	1.278	1.513	0.912	1.837	1.361	1.233	1.148	0.787	1.365
P50914	1.279	1.133	2.184	1.678	0.619	0.497	0.513	1.016	1.945	2.012	1.164	1.961	1.399	0.57	0.384	1	1.899	2.147	1.477	1.243	0.865	2.023	1.307	1.654	0.787	1.516	1.723	1.41	0.803	0.693	1.098	0.773	1.454	1.368	0.891	2.066	1.109	0.671	1.248	1.462	1.152	1.223	0.725	1.78	1.251	1.189	1.051	0.762	1.316
F5GYQ1	1.267	1.162	2.212	1.712	0.646	0.485	0.485	1.022	2.135	1.78	1.205	2.106	1.442	0.597	0.372	0.924	1.886	2.332	1.199	1.094	0.689	1.565	1.173	1.331	0.695	1.177	1.298	1.304	0.75	0.637	1.03	0.687	1.332	1.229	0.855	1.928	1.065	0.718	1.181	1.417	1.132	1.2	0.744	1.671	1.246	1.203	1.083	0.771	1.267
P55145	1.617	1.295	3.062	1.857	0.711	0.552	0.681	1.163	2.364	2.212	1.285	2.656	1.761	0.804	0.447	1.043	1.76	2.276	1.634	0.976	0.79	1.608	1.209	1.482	0.618	1.315	1.343	1.329	0.656	0.716	0.806	0.769	1.264	1.184	0.799	1.718	1.337	0.834	1.043	1.603	1.16	1.146	0.722	1.82	1.285	1.331	1.193	0.972	1.482
Q14677	1.304	1.097	2.052	1.505	0.703	0.597	0.674	1.005	1.972	2.413	1.291	2.165	1.511	0.848	0.501	1.103	1.986	2.436	1.728	1.169	0.866	1.816	1.263	1.582	0.706	1.383	1.51	1.351	0.767	0.657	1.082	0.799	1.483	1.39	0.915	2.062	1.064	0.679	1.221	1.458	1.171	1.229	0.686	1.838	1.267	1.186	1.057	0.789	1.367
O94905	1.197	1.186	2.191	1.842	0.605	0.396	0.484	0.892	1.992	2.036	1.255	1.957	1.365	0.742	0.416	0.837	1.695	2.155	1.227	1.207	0.737	1.753	1.289	1.567	0.845	1.412	1.629	1.371	0.78	0.667	1.071	0.812	1.356	1.343	0.968	2.044	1.051	0.715	1.119	1.351	1.007	1.139	0.666	1.471	1.268	1.201	1.08	0.798	1.285
P63279	1.434	1.286	2.556	2.038	0.755	0.581	0.602	1.2	2.497	2.281	1.432	2.663	1.988	0.844	0.483	1.329	2.371	2.827	1.596	1.253	0.829	1.966	1.422	1.739	0.753	1.383	1.782	1.454	0.755	0.69	1.16	0.818	1.356	1.316	0.859	2.146	1.083	0.72	1.193	1.523	1.091	1.014	0.515	1.669	1.279	1.117	1.049	0.681	1.299
P51531
M0QWZ7	1.386	1.214	2.182	1.679	0.737	0.673	0.745	1.01	2.108	2.393	1.167	1.933	1.373	0.729	0.479	0.904	1.699	2.251	1.459	1.093	0.819	1.795	1.295	1.557	0.798	1.363	1.451	1.384	0.848	0.687	1.11	0.773	1.491	1.448	1.009	2.038	1.074	0.687	1.189	1.369	1.086	1.196	0.682	1.719	1.177	1.12	1.04	0.804	1.295
P46734	1.367	1.119	2.203	1.678	0.661	0.541	0.55	0.995	1.976	1.603	1.29	2.331	1.604	0.663	0.467	1.002	2.085	2.597	1.268	1.106	0.779	1.905	1.357	1.606	0.907	1.449	1.554	1.406	0.667	0.7	1.09	0.892	1.506	1.448	0.971	1.925	1.066	0.666	1.093	1.466	1.096	1.068	0.715	1.578	1.232	1.165	1.007	0.817	1.309
P48426	1.374	1.204	2.27	1.782	0.688	0.546	0.616	1.03	2.127	2.048	1.218	1.998	1.386	0.7	0.449	1.075	1.794	2.178	1.749	1.256	0.85	1.836	1.31	1.517	0.729	1.358	1.491	1.349	0.774	0.692	1.061	0.779	1.35	1.316	0.894	2.05	1.059	0.677	1.165	1.385	1.118	1.231	0.694	1.818	1.259	1.211	1.109	0.822	1.355
O14786	1.537	1.285	2.694	2.124	0.986	0.836	0.775	1.245	2.483										1.326	1.181	0.701	1.806	1.316	1.836	0.968	1.536	1.493	1.288	0.793	0.681	1.212	0.795	1.171	1.293	0.887	2.049	1.181	0.791	1.45	1.81	1.285	1.428	0.851	2.052	1.417	1.425	1.295	0.967	1.75
P40855	1.215	1.226	2.343	1.746	0.768	0.68	0.684	0.964	2.355	1.908	1.033	1.722	1.336	0.745	0.454	0.77	1.397	1.878	1.341	1.021	0.746	1.509	1.083	1.202	0.596	1.049	1.168	1.392	0.813	0.71	0.986	0.728	1.185	1.067	0.735	1.75	1.094	0.765	1.173	1.465	1.087	1.176	0.663	1.924	1.321	1.067	0.956	0.749	1.258
Q6DD88	1.327	1.182	2.131	1.679	0.718	0.609	0.593	0.982	2.012	2.325	1.32	2.122	1.507	0.797	0.497	1.062	1.936	2.487	1.664	1.18	0.779	1.833	1.251	1.503	0.757	1.278	1.579	1.376	0.826	0.743	1.092	0.793	1.408	1.268	0.819	2.143	0.987	0.664	1.202	1.426	1.097	1.134	0.677	1.634	1.246	1.192	1.023	0.789	1.317
Q00796	1.363	1.19	2.488	2.008	0.818	0.561	0.649	1.068	2.275	1.836	1.199	2.051	1.463	0.675	0.465	1.002	1.858	2.354	1.309	1.182	0.834	1.787	1.305	1.563	0.854	1.367	1.43	1.331	0.75	0.664	0.977	0.716	1.245	1.246	0.808	1.863	1.072	0.682	1.178	1.364	1.093	1.192	0.726	1.768	1.177	1.304	1.131	0.797	1.419
K7EMQ3										1.106	1.039	1.821	1.42	0.541	0.371	0.585	1.741	2.013
P80303	1.175	1.101	2.169	1.654	0.672	0.508	0.568	0.96	1.921	2.137	1.204	2.083	1.472	0.796	0.467	0.903	1.995	2.344	1.242	1.094	0.748	1.545	1.169	1.425	0.658	1.169	1.481	1.241	0.697	0.635	0.981	0.741	1.281	1.196	0.817	1.851	0.938	0.611	1.081	1.218	0.954	1.022	0.584	1.592	1.121	1.022	0.962	0.676	1.205
H7BXH2	1.362	1.213	2.392	1.77	0.774	0.675	0.768	1.043	2.234	1.791	1.344	2.341	1.605	0.752	0.508	1.091	2.001	2.653	1.399	1.269	0.881	1.776	1.444	1.634	0.926	1.452	1.578	1.536	0.997	0.857	1.224	0.818	1.576	1.596	0.991	2.192	1.091	0.701	1.258	1.471	1.15	1.172	0.811	1.672	1.306	1.144	1.022	0.795	1.249
Q7KZ85	1.344	1.168	2.265	1.749	0.746	0.553	0.583	0.986	2.152	2.24	1.269	2.076	1.534	0.78	0.46	1.085	2.2	2.461	1.401	1.047	0.827	2.062	1.251	1.476	0.771	1.309	1.622	1.417	0.857	0.815	1.104	0.869	1.743	1.519	1.057	2.341	1.148	0.7	1.316	1.723	1.253	1.279	0.764	1.96	1.356	1.145	1.051	0.854	1.319
Q16836	1.247	1.001	1.974	1.542	0.601	0.443	0.557	0.927	1.814	2.145	1.2	2.026	1.482	0.746	0.424	0.986	1.854	2.264	1.555	1.211	0.804	1.857	1.306	1.603	0.699	1.348	1.606	1.322	0.717	0.654	1.044	0.734	1.247	1.193	0.809	1.911	1.096	0.741	1.222	1.503	1.174	1.226	0.688	1.826	1.326	1.116	1.006	0.702	1.268
A0A087X1H5	1.381	1.113	2.181	1.83	0.662	0.594	0.565	1.111	2.156	1.917	1.108	1.8	1.418	0.67	0.419	0.978	1.615	2.125	1.467	1.225	0.887	1.774	1.191	1.636	0.774	1.29	1.305	1.138	0.747	0.684	1.057	0.693	1.328	1.265	0.78	1.803	0.93	0.564	1.002	1.331	1.017	1.192	0.644	1.784	1.196	1.193	1.101	0.833	1.294
Q15637	1.421	1.3	2.448	1.825	0.783	0.57	0.634	1.163	2.169	2.415	1.191	1.871	1.269	0.767	0.448	1.032	1.674	1.851	1.459	1.174	0.941	2.079	1.4	1.793	0.776	1.562	1.678	1.354	0.776	0.716	1.038	0.796	1.491	1.458	0.949	1.888	1.151	0.789	1.169	1.618	1.208	1.327	0.776	2.014	1.274	1.27	1.231	0.984	1.418
P63000	1.297	1.121	2.138	1.758	0.617	0.515	0.461	1.006	1.849	1.775	1.227	2.192	1.501	0.599	0.399	0.868	1.809	2.355	1.31	1.265	0.935	2.019	1.286	1.646	0.773	1.491	1.579	1.307	0.742	0.698	0.984	0.697	1.281	1.143	0.804	1.984	1.11	0.667	1.109	1.392	1.058	1.142	0.691	1.737	1.166	1.132	1.057	0.773	1.243
P55957	1.364	1.234	2.11	1.458	0.672	0.569	0.623	1.127	1.792	1.662	1.242	2.103	1.56	0.639	0.448	1.044	1.922	2.152	1.533	1.166	0.882	1.799	1.384	1.651	0.77	1.451	1.512	1.455	0.865	0.732	1.111	0.866	1.677	1.702	0.995	2.068	1.285	0.779	1.361	1.825	1.366	1.311	0.682	2.003	1.619	1.29	1.224	0.849	1.499
P22059	1.349	1.112	2.339	1.804	0.653	0.567	0.544	1.037	2.112	2.112	1.29	2.448	1.664	0.829	0.52	1.105	2.121	2.697	1.42	1.159	0.837	2.083	1.28	1.749	0.799	1.461	1.848	1.414	0.766	0.702	1.092	0.749	1.389	1.292	0.88	2.178	1.077	0.626	1.186	1.488	1.114	1.211	0.659	1.763	1.374	1.13	1.001	0.761	1.313
Q8IV08	1.379	1.28	2.348	1.89	0.733	0.561	0.551	1.085	2.153	2.348	1.304	2.165	1.557	0.866	0.491	1.141	1.864	2.542	1.485	1.231	0.843	1.859	1.371	1.545	0.81	1.393	1.732	1.431	0.79	0.709	1.157	0.816	1.429	1.394	0.942	2.165	1.143	0.776	1.282	1.459	1.163	1.258	0.776	1.817	1.313	1.207	1.113	0.809	1.361
Q14790	1.279	1.133	2.145	1.663	0.66	0.51	0.505	0.961	1.953	1.866	1.219	2.247	1.581	0.725	0.491	0.967	1.893	2.433	1.053	1.101	0.779	1.606	1.124	1.472	0.779	1.258	1.337	1.288	0.763	0.721	1.062	0.771	1.4	1.264	0.934	1.938	1.024	0.677	1.139	1.308	1.077	1.198	0.716	1.758	1.26	1.082	1	0.791	1.319
Q02818	1.153	0.971	1.795	1.357	0.587	0.477	0.472	0.903	1.642	1.724	1.134	1.826	1.284	0.623	0.354	0.831	1.714	2.055	1.125	1.026	0.751	1.554	1.099	1.415	0.7	1.304	1.335	1.202	0.663	0.533	0.956	0.778	1.296	1.288	0.896	1.693	0.963	0.648	1.097	1.344	1.034	1.08	0.63	1.66	1.148	1.03	0.952	0.655	1.184
A0A1W2PQS6	1.34	1.063	2.049	1.556	0.641	0.49	0.559	0.922	1.817	2.197	1.222	2.07	1.443	0.741	0.491	0.896	1.702	2.213	1.737	1.225	0.822	1.922	1.275	1.563	0.739	1.333	1.493	1.428	0.802	0.735	1.136	0.808	1.389	1.349	0.923	2.073	1.119	0.689	1.199	1.446	1.096	1.156	0.65	1.648	1.2	1.143	1.074	0.779	1.302
Q9Y2T2	1.378	1.167	2.494	2.006	0.693	0.532	0.472	0.949	2.115	1.523	1.439	2.383	1.755	0.697	0.411	1.086	2.16	2.776	1.298	1.31	0.919	1.826	1.423	1.854	0.977	1.579	1.821	1.313	0.802	0.755	1.431	0.903	1.488	1.402	1.034	2.09	1.036	0.725	1.154	1.387	1.142	1.124	0.754	1.659	1.359	1.123	1.1	0.881	1.411
P62249	1.279	1.01	1.985	1.543	0.596	0.474	0.533	0.976	1.763	2.347	1.276	2.201	1.533	0.696	0.487	1.039	2.064	2.382	1.598	1.246	0.83	1.948	1.246	1.61	0.762	1.37	1.528	1.454	0.814	0.713	1.156	0.828	1.484	1.427	0.956	2.203	1.012	0.624	1.169	1.379	1.069	1.149	0.636	1.773	1.146	1.123	1.004	0.691	1.259
P68036	1.912	1.541	3.653	2.093	0.873	0.687	0.682	1.383	2.471	2.638	1.641	3.296	2.324	1.013	0.565	1.673	2.171	2.512	2.159	1.332	1.177	2.331	1.675	2.245	0.894	1.89	2.056	1.706	0.879	0.906	1.08	0.972	1.732	1.585	0.9	1.782	1.622	1.065	1.558	1.92	1.617	1.271	0.813	1.911	1.67	1.386	1.297	1.084	1.443
P16989	1.302	1.19	2.268	1.744	0.85	0.726	0.749	0.939	2.216	2.823	1.25	2.123	1.554	1.057	0.656	1.191	1.762	2.551	1.856	1.206	1.07	2.026	1.221	1.724	0.779	1.573	1.625	1.245	0.775	0.676	0.913	0.798	1.537	1.493	0.989	2.103	0.928	0.654	1.232	1.41	1.088	1.401	0.734	2.402	1.331	1.097	1.012	0.805	1.239
P08621	1.242	0.988	2.059	1.551	0.601	0.464	0.505	0.998	1.798	2.104	1.209	2.159	1.481	0.716	0.424	1.026	1.883	2.348	1.676	1.152	0.794	1.809	1.215	1.486	0.627	1.279	1.469	1.4	0.824	0.727	1.166	0.83	1.536	1.453	0.969	2.23	1.189	0.713	1.243	1.561	1.15	1.247	0.717	1.965	1.302	1.268	1.096	0.821	1.384
O75306	1.424	1.272	2.573	2	0.824	0.637	0.635	1.182	2.417	1.779	1.361	2.316	1.672	0.735	0.513	1.204	2.234	2.592	1.37	1.329	0.963	2.067	1.498	1.818	0.853	1.598	1.844	1.346	0.819	0.735	1.176	0.833	1.48	1.414	0.99	2.179	1.111	0.714	1.239	1.549	1.255	1.236	0.723	1.904	1.388	1.213	1.078	0.845	1.388
Q9BTV4	1.294	1.181	2.105	1.737	0.756	0.56	0.565	0.919	1.974	2.242	1.235	2.085	1.418	0.827	0.456	0.9	1.681	2.321	1.638	1.126	0.799	1.818	1.207	1.418	0.632	1.265	1.349	1.319	0.731	0.65	0.993	0.711	1.265	1.224	0.806	1.899	1.079	0.647	1.101	1.272	1.006	1.14	0.66	1.658	1.022	1.212	1.005	0.789	1.215
C9J840	1.363	1.143	1.677	1.167	0.786	0.649	0.757	0.808	1.602	2.356	1.106	1.432	1.194	0.882	0.51	0.803	0.99	1.988	1.667	1.087	0.785	1.79	1.191	1.378	0.579	1.166	1.33	1.269	0.95	0.674	1.103	0.894	1.512	1.514	0.994	2.25										1.19	1.18	0.877	1.31
A0A087WT45	1.262	1.024	1.946	1.498	0.646	0.497	0.643	0.924	1.78	2.357	1.103	1.704	1.316	0.775	0.52	0.798	1.485	1.958	1.485	1.419	0.919	2.137	1.583	2.024	0.957	1.55	1.911	1.425	0.872	0.781	1.116	0.89	1.704	1.463	1.167	2.191	1.11	0.885	1.305	1.618	1.155	1.216	0.886	1.683	1.466	1.124	0.944	0.853	1.48
P49407	1.269	1.1	2.032	1.576	0.627	0.597	0.573	0.986	1.933	2.019	1.123	1.895	1.322	0.689	0.383	0.886	1.676	2.147	1.493	1.197	0.895	2.039	1.405	1.781	0.752	1.599	1.677	1.433	0.752	0.787	1.092	0.772	1.644	1.49	1.02	2.216	1.164	0.755	1.296	1.575	1.179	1.4	0.786	2.098	1.401	1.287	1.149	0.86	1.476
X5CMH5	1.277	1.185	2.021	1.543	0.742	0.586	0.689	1.038	2.011	2.518	1.162	1.95	1.392	0.799	0.436	1.035	1.935	2.305	1.662	1.255	0.897	1.967	1.343	1.782	0.772	1.463	1.741	1.372	0.839	0.743	1.127	0.879	1.603	1.525	1.063	2.193	1.061	0.719	1.251	1.443	1.182	1.304	0.759	1.849	1.397	1.229	1.081	0.82	1.366
Q9NTZ6	1.328	1.174	2.244	1.707	0.635	0.555	0.529	1.033	2.039	1.863	1.11	1.972	1.371	0.66	0.411	0.972	1.788	2.267	1.511	1.098	0.776	1.785	1.183	1.506	0.766	1.31	1.461	1.269	0.733	0.65	1.021	0.752	1.414	1.372	0.924	1.958	0.981	0.617	1.132	1.34	1.055	1.18	0.685	1.715	1.194	1.093	1.001	0.775	1.262
P00492	1.421	1.238	2.416	1.838	0.687	0.545	0.517	1.109	2.074	2.055	1.464	2.518	1.695	0.752	0.513	1.104	2.216	2.66	1.176	1.359	0.898	1.943	1.52	1.825	0.983	1.767	2.042	1.461	0.792	0.747	1.138	0.894	1.626	1.586	1.069	2.3	1.175	0.788	1.289	1.591	1.233	1.381	0.79	1.908	1.467	1.263	1.17	0.825	1.401
P61088	1.422	1.205	2.438	1.882	0.761	0.628	0.621	1.093	2.139	2.13	1.421	2.566	1.834	0.77	0.551	1.32	2.445	2.728	1.619	1.295	0.936	2.039	1.379	1.821	0.844	1.581	1.721	1.422	0.882	0.785	1.142	0.873	1.569	1.597	1.016	2.062	1.197	0.818	1.349	1.625	1.312	1.394	0.741	2.016	1.432	1.232	1.184	0.824	1.388
J3KR49	1.703	1.428	3.402	2.292	0.802	0.615	0.902	1.32	2.93
Q92538	1.362	1.103	2.272	1.853	0.706	0.636	0.628	1.069	2.303	2.395	1.328	2.153	1.572	0.721	0.548	1.08	2.139	2.282	1.407	1.13	0.819	1.792	1.338	1.555	0.808	1.495	1.55	1.446	0.783	0.815	1.191	0.903	1.559	1.522	1.06	2.348	1.126	0.725	1.137	1.466	1.15	1.178	0.697	1.664	1.265	1.16	1.084	0.79	1.313
Q9Y4W6	1.205	1	1.83	1.382	0.621	0.504	0.564	0.851	1.653	2.224	1.163	1.899	1.371	0.784	0.454	0.921	1.5	2.178	1.44	1.135	0.824	1.82	1.154	1.473	0.709	1.245	1.4	1.182	0.676	0.651	0.946	0.698	1.132	1.156	0.742	1.843	0.95	0.604	1.136	1.333	1.028	1.182	0.708	1.711	1.214	1.158	1.012	0.766	1.234
Q01469	1.344	1.066	2.459	2.094	0.616	0.441	0.591	1.004	2.232	2.448	1.507	2.628	2.452	0.802	0.493	1.245	2.214	2.827	1.473	1.234	0.759	1.898	1.271	1.622	0.667	1.283	1.621	1.486	0.884	0.674	1.171	0.756	1.406	1.309	0.83	2.123	1.164	0.69	1.121	1.473	1.115	1.133	0.656	1.797	1.329	1.194	1.086	0.772	1.399
Q12768	1.286	1.101	2.459	1.865	0.64	0.462	0.441	0.97	2.183	1.459	1.401	2.512	1.722	0.547	0.446	1.222	2.374	2.806	1.025	1.266	0.873	1.816	1.477	1.779	1.114	1.742	1.716	1.401	0.717	0.684	1.101	0.784	1.252	1.242	0.939	1.989	1.075	0.66	1.138	1.467	1.143	1.12	0.725	1.415	1.279	1.129	1.102	0.721	1.23
P36507	1.355	1.225	2.418	1.859	0.686	0.52	0.449	0.987	2.03	2.318	1.321	2.186	1.576	0.744	0.504	0.891	1.674	2.405	1.304	1.212	0.923	1.955	1.294	1.687	0.795	1.388	1.7	1.332	0.805	0.691	1.09	0.791	1.426	1.324	0.907	2.025	1.032	0.795	1.177	1.385	1.08	1.182	0.711	1.67	1.213	1.2	1.012	0.806	1.251
C9JSZ1																			1.447	0.994	0.895	1.731	1.064	1.405	0.607	1.265	1.146	1.174	0.74	0.614	0.929	0.747	1.384	1.458	1.036	2.024
Q16778	1.324	1.196	1.898	1.922	0.666	0.53	0.656	1.029	1.796	2.447	1.324	2.338	1.813	1.115	0.638	1.407	2.407	2.648	1.651	1.658	1.061	2.92	2.051	1.75	0.914	2.001	1.734	1.494	1.085	0.862	1.412	1.213	1.937	1.798	1.12	2.867	1.442	0.817	1.466	2.03	1.39	1.498	0.86	2.132	1.352	1.546	1.615	0.882	1.742
P62633	1.284	1.03	1.808	1.408	0.652	0.533	0.593	0.994	1.633	2.573	1.202	1.732	1.42	0.822	0.473	1.183	1.702	1.97	1.563	1.148	0.887	1.898	1.283	1.643	0.716	1.436	1.612	1.434	0.778	0.661	1.15	0.834	1.496	1.468	0.91	2.051	1.153	0.738	1.245	1.631	1.233	1.325	0.739	2.188	1.396	1.253	1.175	0.873	1.55
Q12797	1.35	1.036	1.98	1.38	0.712	0.72	0.677	1.108	1.954	2.506	1.294	2.241	1.773	0.885	0.479	1.132	2.013	2.592	1.798	1.253	0.926	2.268	1.493	1.779	0.846	1.691	1.979	1.391	0.792	0.664	1.146	0.868	1.486	1.452	0.97	2.235	1.065	0.744	1.284	1.499	1.167	1.365	0.731	1.8	1.409	1.39	1.177	0.916	1.506
G3V3E8	1.282	1	1.897	1.489	0.587	0.417	0.499	0.807	1.606	2.422	1.247	2.235	1.512	0.764	0.431	0.919	1.78	2.404	1.802	1.294	0.871	1.96	1.253	1.571	0.692	1.254	1.438	1.368	0.79	0.702	1.071	0.851	1.424	1.398	0.865	2.131	1.108	0.626	1.137	1.436	1.068	1.051	0.582	1.706	1.14	1.185	1.05	0.747	1.347
Q9UHD2	1.335	1.184	2.14	1.696	0.76	0.631	0.718	0.954	2.114	2.192	1.308	1.996	1.612	0.776	0.464	0.998	1.906	2.501	1.697	1.203	0.992	1.876	1.286	1.71	0.831	1.355	1.362	1.288	0.9	0.795	1.084	0.822	1.352	1.388	0.947	2.084	0.883	0.617	1.359	1.315	1.175	1.201	0.825	1.507	1.344	1.184	1.086	0.796	1.319
P48556	1.21	1.13	2.013	1.606	0.617	0.536	0.553	1.022	1.883	1.843	1.125	1.966	1.482	0.648	0.439	1.052	1.874	2.198	1.595	1.208	0.785	1.854	1.272	1.639	0.74	1.323	1.508	1.357	0.777	0.686	1.071	0.763	1.364	1.284	0.878	2.006	1.061	0.684	1.196	1.388	1.011	1.155	0.638	1.695	1.24	1.163	1.083	0.747	1.354
Q6NVY1	1.323	1.161	2.355	1.793	0.684	0.546	0.574	1.119	2.059	2.411	1.329	2.105	1.615	0.838	0.537	1.452	1.869	2.493	1.373	1.17	0.846	1.815	1.235	1.499	0.776	1.283	1.521	1.445	0.772	0.727	1.121	0.772	1.465	1.41	0.951	2.036	0.953	0.622	1.039	1.282	1.014	1.073	0.612	1.621	1.092	0.983	0.924	0.667	1.077
Q15121	1.477	1.262	2.26	1.63	0.722	0.599	0.676	1.319	1.919	2.667	1.292	2.161	1.622	0.926	0.497	1.229	2.033	2.176	1.668	1.319	0.895	1.944	1.41	1.773	0.781	1.435	1.652	1.671	0.942	0.814	1.26	0.984	1.623	1.601	1.041	2.328	1.206	0.737	1.322	1.702	1.281	1.185	0.632	1.987	1.434	1.344	1.227	0.856	1.535
Q12874	1.254	0.995	1.954	1.461	0.585	0.434	0.498	0.884	1.647	2.347	1.179	1.978	1.424	0.772	0.443	1.025	1.74	2.185	1.425	1.135	0.786	1.712	1.197	1.398	0.67	1.247	1.344	1.329	0.758	0.66	1.068	0.722	1.238	1.182	0.799	1.889	1.121	0.687	1.154	1.519	1.111	1.128	0.621	1.729	1.201	1.245	1.077	0.803	1.304
A0A2R8Y6Y7	1.326	1.127	2.159	1.663	0.695	0.565	0.537	0.989	2.043	2.165	1.199	2.163	1.55	0.757	0.451	1.035	1.826	2.532	1.645	1.199	0.862	1.878	1.236	1.562	0.702	1.35	1.525	1.311	0.797	0.687	1.078	0.78	1.407	1.379	0.913	2.087	0.997	0.652	1.118	1.379	1.102	1.142	0.698	1.662	1.195	1.135	1.021	0.807	1.321
P36543	1.427	1.293	2.688	1.877	0.699	0.572	0.622	1.204	2.283	2.185	1.359	2.397	1.696	0.831	0.486	1.349	2.033	2.266	1.258	1.171	0.844	1.874	1.412	1.657	0.79	1.531	1.731	1.364	0.845	0.711	1.034	0.874	1.567	1.478	1.027	1.957	1.181	0.784	1.156	1.554	1.188	1.139	0.676	1.753	1.271	1.314	1.178	0.815	1.476
Q9Y5K5	1.352	1.287	2.317	1.809	0.735	0.592	0.626	1.113	2.32	2.268	1.338	2.366	1.739	0.818	0.468	1.257	2.209	2.658	1.369	1.218	0.861	1.893	1.256	1.671	0.708	1.434	1.657	1.327	0.785	0.721	1.135	0.87	1.544	1.469	0.977	2.223	1.225	0.81	1.177	1.737	1.291	1.203	0.784	1.704	1.53	1.236	1.073	0.824	1.38
P61081	1.352	1.173	2.131	1.669	0.723	0.551	0.593	1.004	1.928	2.424	1.288	2.254	1.635	0.846	0.48	1.088	1.866	2.513	1.456	1.234	0.84	1.756	1.311	1.649	0.781	1.339	1.539	1.406	0.762	0.715	1.095	0.78	1.455	1.385	0.887	2.089	1.106	0.677	1.202	1.427	1.086	1.119	0.647	1.753	1.245	1.236	1.106	0.806	1.365
Q9NZ01	1.34	1.044	1.998	1.514	0.61	0.467	0.514	0.98	1.724	2.282	1.317	2.235	1.592	0.789	0.471	1.04	2.009	2.495	1.396	1.183	0.801	1.838	1.228	1.48	0.738	1.296	1.422	1.335	0.746	0.658	1.06	0.734	1.234	1.22	0.815	1.82	1.048	0.659	1.107	1.361	1.004	1.042	0.633	1.502	1.114	1.096	0.951	0.715	1.197
P49721	1.235	1.019	2.013	1.591	0.62	0.411	0.474	0.833	1.704	1.802	1.268	2.107	1.522	0.603	0.366	0.953	1.791	2.265	1.492	1.133	0.759	1.708	1.191	1.4	0.691	1.207	1.292	1.324	0.717	0.649	1.003	0.702	1.16	1.082	0.733	1.806	1.067	0.668	1.088	1.351	0.998	1.021	0.598	1.572	1.107	1.131	1.027	0.703	1.209
O15031	1.255	1.179	2.146	1.672	0.761	0.595	0.654	1.033	2.073	1.929	1.075	1.723	1.348	0.652	0.451	0.906	1.61	2.061	1.214	1.067	0.861	1.682	1.213	1.729	0.896	1.592	1.319	1.349	0.73	0.716	1.095	0.788	1.505	1.474	0.941	2.169	1.097	0.71	1.324	1.498	1.239	1.269	0.855	1.933	1.298	1.203	1.07	0.803	1.293
Q9UNN5	1.363	1.139	2.371	1.739	0.791	0.544	0.61	1.096	2.182	1.985	1.25	2.163	1.472	0.705	0.436	0.972	1.829	2.336	1.397	1.276	0.869	1.914	1.366	1.622	0.831	1.497	1.649	1.237	0.763	0.759	1.038	0.785	1.258	1.191	0.886	1.903	1.069	0.692	1.262	1.557	1.116	1.132	0.751	1.705	1.22	1.293	1.142	0.865	1.455
F8WJN3	1.28	1.138	2.33	1.72	0.704	0.632	0.726	1.052	2.187	1.835	1.185	2.072	1.425	0.653	0.404	1.054	1.881	2.29	1.667	1.193	0.892	2.077	1.31	1.724	0.78	1.516	1.75	1.496	0.859	0.791	1.207	0.838	1.535	1.539	1.013	2.151	1.063	0.7	1.25	1.406	1.135	1.189	0.8	1.609	1.276	1.145	1.022	0.763	1.286
Q13043	1.367	1.121	2.063	1.651	0.744	0.539	0.609	0.93	1.833	1.945	1.301	2.265	1.555	0.73	0.517	0.959	2.095	2.422	1.558	1.149	0.803	1.867	1.318	1.561	0.699	1.365	1.374	1.512	0.759	0.712	1.13	0.76	1.401	1.297	0.842	1.965	1.027	0.586	1.046	1.493	1.137	1.113	0.748	1.501	1.248	1.087	0.991	0.746	1.241
P54687	1.11	1.066	2.084	1.655	0.664	0.477	0.483	0.95	1.864	1.383	1.036	1.786	1.321	0.537	0.346	0.898	1.727	2.019	1.357	1.019	0.71	1.53	1.106	1.36	0.663	1.189	1.218	1.229	0.678	0.608	1.012	0.686	1.254	1.196	0.818	1.841	0.9	0.563	1.029	1.194	0.959	0.972	0.595	1.594	1.036	0.977	0.937	0.669	1.098
P78324	1.292	1.205	2.127	1.604	0.704	0.596	0.6	0.96	1.998	2.196	1.162	1.919	1.4	0.761	0.459	0.993	1.647	2.194	1.415	1.139	0.833	1.75	1.232	1.548	0.706	1.377	1.355	1.486	0.834	0.807	1.166	0.867	1.569	1.538	1.019	2.421	1.168	0.789	1.337	1.579	1.244	1.37	0.786	2.062	1.389	1.282	1.173	0.864	1.448
Q14019	1.351	1.125	2.079	1.64	0.633	0.496	0.563	0.915	1.83	2.197	1.326	2.238	1.558	0.787	0.461	0.977	1.747	2.297	1.63	1.216	0.8	1.78	1.272	1.478	0.698	1.211	1.409	1.449	0.771	0.664	1.079	0.779	1.324	1.279	0.847	1.988	1.13	0.723	1.191	1.476	1.101	1.11	0.648	1.736	1.255	1.22	1.104	0.796	1.331
P08311	1.612	1.447	2.705	2.293	0.838	0.67	0.771	1.262	2.623	2.629	1.454	2.764	1.963	0.918	0.545	1.428	2.552	3.045	2.002	1.57	1.075	2.885	1.771	1.972	1.015	2.151	2.224	1.764	0.989	0.864	1.42	1.087	1.888	1.909	1.349	3.052	1.302	0.848	1.55	2.008	1.608	1.629	0.892	2.479	1.44	1.449	1.49	0.958	1.825
Q07666	1.288	1.013	1.891	1.45	0.639	0.433	0.51	0.787	1.653	2.402	1.181	2.077	1.493	0.805	0.451	0.973	1.56	2.257	1.475	1.174	0.828	1.882	1.265	1.544	0.692	1.276	1.463	1.403	0.756	0.65	1.117	0.743	1.204	1.162	0.784	1.943	1.043	0.641	1.168	1.402	1.055	1.186	0.582	1.794	1.14	1.089	1.018	0.754	1.264
Q9UJS0	1.248	1.119	1.992	1.551	0.593	0.496	0.464	1.069	1.935	1.722	1.233	2.314	1.702	0.715	0.448	0.939	1.97	2.727	1.03	1.217	0.905	1.656	1.294	1.765	0.938	1.76	1.662	1.175	0.714	0.653	0.904	0.653	1.299	1.237	0.874	1.867	1.005	0.694	1.102	1.312	1.062	1.038	0.703	1.556	1.234	1.119	1.03	0.747	1.25
P19878	1.333	1.258	2.678	2.187	0.765	0.617	0.624	1.224	2.526	2.357	1.201	1.897	1.364	0.809	0.517	1.142	1.826	2.118										1.468	0.963	0.826	1.345	0.874	1.723	1.808	1.185	2.362	1.06	0.752	1.277	1.518	1.218	1.355	0.803	1.933	1.344	1.27	1.082	0.869	1.43
O75340	1.328	1.107	2.086	1.611	0.674	0.502	0.508	0.885	1.899	2.128	1.376	2.297	1.618	0.762	0.493	1.019	1.862	2.514	1.24	1.201	0.797	1.824	1.323	1.633	0.813	1.416	1.678	1.371	0.739	0.661	1.055	0.737	1.329	1.263	0.892	1.999	1.025	0.663	1.137	1.418	1.1	1.166	0.675	1.594	1.232	1.15	1.002	0.733	1.248
P62888	1.297	1.085	1.973	1.568	0.597	0.494	0.545	0.965	1.755	1.93	1.066	1.932	1.421	0.652	0.393	1.028	1.704	1.973	1.474	1.19	0.81	1.779	1.241	1.519	0.688	1.269	1.595	1.24	0.74	0.622	0.99	0.726	1.256	1.159	0.797	1.838	1.141	0.735	1.305	1.527	1.269	1.313	0.747	1.908	1.249	1.119	1.031	0.706	1.277
P51452	1.305	1.158	2.137	1.634	0.706	0.546	0.523	1	2.05	1.862	1.177	2.012	1.385	0.684	0.417	0.945	1.834	2.297	1.422	1.205	0.8	1.887	1.402	1.681	0.811	1.398	1.557	1.327	0.734	0.684	0.973	0.691	1.299	1.138	0.783	1.843	1.034	0.802	1.202	1.585	1.177	1.287	0.727	1.814	1.377	1.046	1.021	0.799	1.213
O95347	1.336	1.173	2.296	1.748	0.746	0.557	0.63	0.991	2.146	0.973	1.671	3.799	2.151	0.446	0.583	1.267	2.985	4.552	1.715	1.086	0.783	1.729	1.19	1.464	0.651	1.147	1.372	1.292	0.745	0.648	1.002	0.738	1.324	1.286	0.836	1.931	1.02	0.613	1.02	1.369	0.935	1.154	0.676	1.963	1.236	1.197	1.033	0.782	1.265
Q8NBJ5	1.46	1.222	2.431	1.908	0.76	0.635	0.718	1.054	2.326	2.288	1.416	2.561	1.793	0.833	0.515	1.135	2.087	2.76	1.422	1.274	0.835	1.793	1.383	1.582	0.815	1.38	1.611	1.363	0.797	0.746	1.127	0.787	1.32	1.308	0.889	2.083	1.067	0.679	1.138	1.382	1.087	1.049	0.722	1.493	1.278	1.191	1.101	0.802	1.321
E7EQ69	1.301	1.097	2.166	1.626	0.63	0.509	0.543	0.957	1.909	2.019	1.232	2.258	1.638	0.729	0.444	1.016	1.942	2.522	1.384	1.159	0.847	1.856	1.317	1.593	0.787	1.432	1.555	1.341	0.776	0.659	1.077	0.81	1.429	1.376	0.942	2.03	1.056	0.71	1.176	1.425	1.134	1.22	0.687	1.888	1.304	1.124	1.035	0.774	1.213
Q12882	1.366	1.142	2.312	1.864	0.595	0.476	0.46	1.151	2.077	1.624	1.401	2.574	1.744	0.632	0.512	1.041	2.466	2.854	1.069	1.181	0.815	1.775	1.411	1.425	0.885	1.369	1.563	1.441	0.735	0.785	1.032	0.845	1.396	1.431	1.051	2.108	1.161	0.692	1.241	1.658	1.209	1.241	0.749	1.761	1.372	1.202	1.058	0.77	1.407
P13073	1.636	1.385	2.633	1.766	0.815	0.646	0.687	1.283	2.281	2.167	1.192	2.082	1.487	0.841	0.479	1.246	1.752	2.026	1.657	1.222	0.976	2.019	1.446	1.753	0.796	1.515	1.663	1.466	0.897	0.76	1.024	0.889	1.501	1.478	0.917	1.965	1.252	0.862	1.208	1.727	1.228	1.164	0.732	1.932	1.368	1.258	1.16	0.867	1.426
O75608	1.396	1.197	2.171	1.7	0.723	0.543	0.567	1.025	1.931	2.136	1.25	2.061	1.56	0.744	0.472	1.112	1.838	2.304	1.561	1.217	0.853	1.868	1.34	1.581	0.742	1.392	1.475	1.418	0.81	0.718	1.098	0.82	1.407	1.374	0.906	1.97	1.089	0.743	1.213	1.412	1.06	1.192	0.647	1.713	1.188	1.14	1.083	0.837	1.317
H7BZJ3	1.331	1.211	2.19	1.574	0.792	0.693	0.676	1.131	2.088	2.187	1.098	1.972	1.496	0.822	0.518	1.226	1.736	2.285	1.474	1.146	0.757	1.659	1.202	1.388	0.696	1.213	1.388	1.321	0.797	0.668	1.113	0.832	1.504	1.422	0.944	2.018	1.063	0.722	1.26	1.448	1.199	1.271	0.696	1.927	1.291	1.134	1.119	0.915	1.319
P40429	1.261	1.031	2.076	1.624	0.603	0.473	0.489	1.032	1.854	2.218	1.283	2.183	1.509	0.694	0.484	0.949	1.86	2.387	1.586	1.229	0.803	1.873	1.238	1.607	0.73	1.387	1.56	1.358	0.773	0.701	1.057	0.746	1.4	1.295	0.89	2.046	1.062	0.676	1.169	1.391	1.072	1.147	0.675	1.726	1.214	1.165	1.059	0.798	1.285
P08574	1.435	1.316	2.617	2	0.833	0.702	0.733	1.101	2.363	2.787	1.327	2.235	1.659	0.929	0.509	1.15	2.026	2.515	1.644	1.278	0.996	2.062	1.34	1.722	0.776	1.528	1.595	1.535	0.908	0.771	1.245	0.972	1.666	1.572	1.103	2.275	1.217	0.762	1.353	1.599	1.333	1.52	0.821	2.306	1.467	1.324	1.153	0.879	1.513
P19784	1.408	1.142	2.26	1.747	0.738	0.506	0.604	0.937	2.042	2.384	1.286	2.214	1.58	0.89	0.514	1.068	1.898	2.69	1.554	1.193	0.82	1.801	1.26	1.53	0.761	1.191	1.365	1.388	0.762	0.751	1.089	0.804	1.347	1.254	0.878	2.087	1.059	0.678	1.151	1.413	1.076	1.053	0.699	1.526	1.238	1.195	1.088	0.828	1.289
H3BQQ9
F5GWT4	1.264	1.095	1.825	1.292	0.581	0.545	0.538	0.9	1.623	2.259	1.112	1.635	1.246	0.854	0.504	1.016	1.523	1.915	1.468	1.192	0.868	1.808	1.195	1.526	0.742	1.281	1.446	1.186	0.848	0.652	0.915	0.861	1.394	1.387	1.004	1.898	1.1	0.719	1.222	1.404	1.091	1.264	0.738	1.97	1.277	1.103	1.005	0.811	1.247
P09661	1.296	1.135	1.856	1.461	0.639	0.501	0.575	0.951	1.69	2.016	1.25	2.006	1.54	0.747	0.414	0.936	1.725	2.223	1.57	1.179	0.835	1.822	1.305	1.595	0.718	1.383	1.516	1.394	0.811	0.69	1.093	0.845	1.441	1.415	0.972	2.011	1.116	0.752	1.251	1.561	1.21	1.281	0.7	2.024	1.332	1.22	1.105	0.748	1.378
O00743	1.3	1.209	2.19	1.7	0.678	0.556	0.538	0.934	1.922	2.178	1.344	2.254	1.611	0.765	0.526	1.234	2.142	2.473	1.417	1.215	0.841	1.804	1.263	1.609	0.811	1.365	1.581	1.32	0.788	0.68	1.044	0.8	1.399	1.344	0.932	1.945	1.08	0.672	1.206	1.487	1.131	1.22	0.749	1.835	1.283	1.188	1.087	0.81	1.273
Q99805	1.335	1.148	2.249	1.732	0.7	0.519	0.516	1.049	2.031	2.061	1.216	2.076	1.451	0.77	0.499	0.906	1.788	2.359	1.427	1.158	0.838	1.789	1.205	1.551	0.732	1.3	1.465	1.324	0.783	0.694	0.987	0.725	1.263	1.221	0.864	1.943	0.944	0.633	1.096	1.299	0.983	1.081	0.609	1.667	1.118	1.123	1.023	0.752	1.281
E9PDF6	1.277	0.997	2.019	1.623	0.706	0.53	0.677	0.867	1.879	2.936	1.204	1.798	1.422	0.914	0.555	0.992	1.562	2.206										1.656	1.083	0.859	1.253	0.923	1.551	1.446	1.122	2.422	1.08	0.719	1.19	1.392	1.136	1.261	0.821	1.663	1.338	1.464	1.294	1.004	1.51
E9PL71																			1.832	1.043	1.024	1.944	1.281	1.689	0.694	1.486	0.997										1.134	0.686	1.45	1.691	1.149	1.47	0.75	2.517	1.191	1.1	0.85	0.719	1.143
Q9ULC4	1.238	1.237	2.224	1.77	0.649	0.46	0.484	0.968	1.932	1.777	1.36	2.596	1.799	0.628	0.427	1.086	2.155	2.863	1.314	1.109	0.762	1.732	1.177	1.475	0.68	1.284	1.468	1.315	0.671	0.63	1.013	0.769	1.264	1.388	0.848	2.027	1.215	0.729	1.214	1.469	1.164	1.268	0.795	1.747	1.408	1.146	1.005	0.766	1.193
Q13057	1.251	1.079	2.15	1.64	0.67	0.438	0.442	0.998	1.86	1.338	1.41	2.579	1.755	0.591	0.389	1.153	2.238	2.732	1.264	1.092	0.837	1.751	1.241	1.483	0.83	1.332	1.448	1.38	0.776	0.71	1.125	0.821	1.465	1.434	0.916	2.047	1.04	0.606	1.227	1.462	1.153	1.125	0.725	1.519	1.24	1.09	0.983	0.73	1.238
Q9BT09	1.351	1.143	2.17	1.629	0.693	0.515	0.614	0.922	1.94	2.177	1.167	1.869	1.325	0.74	0.428	0.849	1.669	2.114	1.544	1.216	0.775	1.771	1.226	1.479	0.702	1.247	1.374	1.356	0.712	0.6	1.031	0.715	1.207	1.186	0.785	1.855	1.014	0.658	1.077	1.295	0.983	1.021	0.575	1.587	1.104	1.07	0.986	0.657	1.244
A0A087X1K9
H0Y3U8	1.54	1.402	2.875	2.149	0.817	0.665	0.64	1.161	2.531	2.391	1.627	2.866	1.995	0.893	0.585	1.432	2.783	3.124	1.122	1.317	0.875	2.03	1.566	1.845	1.011	1.776	1.742	1.52	0.792	0.801	1.317	0.917	1.513	1.375	1.008	2.65										1.386	1.174	0.881	1.501
P61326	1.233	1.026	1.966	1.537	0.64	0.455	0.484	0.848	1.718	2.024	1.202	2.053	1.41	0.67	0.422	0.906	1.788	2.251	1.463	1.085	0.801	1.868	1.176	1.504	0.705	1.325	1.637	1.23	0.707	0.648	1.016	0.664	1.177	1.137	0.771	1.787	1.155	0.736	1.232	1.431	1.133	1.267	0.799	1.798	1.293	1.204	1.021	0.801	1.298
P23919	1.264	1.146	2.042	1.568	0.697	0.551	0.528	1.052	1.993	2.473	1.342	2.369	1.797	0.92	0.504	1.055	1.849	2.579	1.406	1.207	0.84	1.933	1.232	1.565	0.738	1.362	1.639	1.316	0.732	0.64	1.068	0.732	1.231	1.245	0.838	2.042	1.093	0.729	1.253	1.543	1.202	1.414	0.725	2.156	1.419	1.071	1.014	0.742	1.23
K7EIG1	1.424	1.195	2.011	1.63	0.788	0.635	0.582	1.049	1.896	2.631	1.405	2.355	1.675	0.882	0.575	1.225	2.138	2.667	1.676	1.109	0.956	1.971	1.304	1.602	0.782	1.471	1.677	1.391	0.846	0.76	1.258	0.992	1.503	1.329	0.976	2.108	1.131	0.751	1.317	1.487	1.192	1.423	0.798	2	1.337	1.199	1.057	0.811	1.266
H0YD13	1.512	1.276	2.313	1.816	0.727	0.543	0.557	1.17	2.15	2.347	1.349	2.349	1.653	0.799	0.451	1.11	2.036	2.562	1.765	1.372	0.911	2.125	1.504	1.779	0.82	1.557	1.747	1.595	0.824	0.743	1.223	0.85	1.495	1.451	0.96	2.232	1.288	0.888	1.45	1.8	1.342	1.393	0.795	2.075	1.541	1.373	1.265	0.914	1.523
Q96CX2	1.2	1.041	2.085	1.607	0.67	0.514	0.561	0.976	1.939	1.667	1.292	2.093	1.579	0.614	0.409	1.102	2.009	2.373	1.077	1.158	0.744	1.604	1.278	1.445	0.834	1.313	1.415	1.33	0.762	0.628	1.018	0.771	1.246	1.278	0.753	1.809	0.948	0.629	1.07	1.245	0.984	1.108	0.644	1.572	1.167	1.136	1.02	0.762	1.298
B4DLR8	1.133	0.946	1.624	1.283	0.58	0.436	0.493	0.74	1.507	2.013	0.924	1.51	1.192	0.653	0.413	0.773	1.35	1.795	1.388	1.027	0.673	1.549	1.065	1.303	0.618	1.052	1.179	1.255	0.654	0.553	0.971	0.645	1.147	1.107	0.698	1.727	0.935	0.613	1.046	1.299	0.94	0.912	0.525	1.479	1.037	1.038	0.919	0.634	1.111
A0A087WXS7	1.384	1.213	2.393	1.907	0.699	0.533	0.507	1.163	2.233	1.876	1.336	2.463	1.927	0.711	0.427	1.049	2.37	2.898	1.431	1.218	0.911	1.809	1.364	1.539	0.868	1.383	1.629	1.094	0.801	0.713	0.951	0.822	1.212	1.227	0.771	1.627	1.049	0.668	1.256	1.453	1.174	1.143	0.669	1.779	1.369	1.127	1.051	0.713	1.284
O00182	1.574	1.336	2.629	2.15	0.855	0.707	0.721	1.246	2.562	2.305	1.357	2.351	1.721	0.851	0.575	1.294	2.098	2.842	1.931	1.395	1.015	2.306	1.515	1.954	0.88	1.642	1.838	1.463	0.846	0.805	1.314	0.841	1.651	1.709	1.056	2.565	1.169	0.793	1.362	1.653	1.291	1.397	0.762	2.06	1.437	1.347	1.161	0.903	1.496
P27105	1.325	1.163	2.109	1.667	0.711	0.519	0.503	0.987	2.017	2.068	1.341	2.23	1.566	0.733	0.492	1.12	2.104	2.636	1.714	1.195	0.833	2.017	1.24	1.887	0.753	1.504	2.001	1.289	0.773	0.702	1.111	0.739	1.526	1.418	0.987	2.209	1.047	0.67	1.184	1.553	1.103	1.293	0.684	1.911	1.389	1.174	1.033	0.779	1.297
Q9UBQ5	1.223	1.167	2.219	1.668	0.615	0.492	0.509	1.006	1.993	2.104	1.378	2.456	1.761	0.818	0.469	1.042	2.077	2.683	1.399	1.196	0.828	1.66	1.246	1.57	0.783	1.28	1.442	1.408	0.784	0.706	1.088	0.806	1.365	1.324	0.885	2.045	1.063	0.663	1.159	1.395	1.061	1.125	0.586	1.67	1.204	1.136	1.05	0.728	1.271
E7EU96	1.276	1.118	2.204	1.628	0.668	0.473	0.536	0.993	1.902	1.794	1.182	2.137	1.529	0.666	0.483	0.997	2.087	2.443	1.219	1.355	0.881	1.999	1.431	1.876	0.947	1.615	1.727	1.319	0.832	0.702	1.111	0.817	1.49	1.351	0.966	2.157	0.959	0.64	1.131	1.294	1.017	1.055	0.631	1.38	1.195	1.144	1.057	0.802	1.311
J3KS22	1.271	0.998	2.248	1.793	0.622	0.451	0.467	0.883	1.82	1.86	1.217	2.186	1.525	0.729	0.475	1.026	1.979	2.414	1.342	1.108	0.882	1.751	1.226	1.545	0.795	1.243	1.471	1.363	0.817	0.675	1.102	0.914	1.547	1.495	1.073	1.993	1.015	0.713	1.145	1.415	1.192	1.385	0.826	1.828	1.221	1.05	0.979	0.797	1.254
P48059	1.265	1.088	2.364	1.781	0.611	0.457	0.504	0.978	2.003	2.105	1.305	2.371	1.578	0.732	0.449	1.043	1.98	2.483	1.373	1.195	0.791	1.858	1.301	1.629	0.75	1.421	1.573	1.373	0.779	0.693	1.129	0.844	1.427	1.37	0.924	2.045	1.101	0.748	1.245	1.559	1.189	1.198	0.733	1.742	1.332	1.194	1.062	0.796	1.296
Q15363	1.131	0.956	1.809	1.41	0.589	0.473	0.561	0.841	1.681	2.151	1.114	1.83	1.246	0.726	0.446	0.881	1.578	2.035	1.542	1.029	0.8	1.795	1.151	1.459	0.618	1.163	1.517	1.219	0.709	0.583	1.022	0.683	1.249	1.206	0.833	1.825	1.005	0.637	1.144	1.439	1.024	1.143	0.638	1.753	1.214	1.046	0.941	0.74	1.195
Q9BRR6	1.326	1.104	2.07	1.694	0.689	0.505	0.507	0.918	1.897	1.952	1.472	2.194	1.748	0.802	0.546	1.185	2.275	2.652	1.258	1.206	0.87	1.928	1.355	1.59	0.819	1.475	1.443	1.265	0.775	0.723	0.969	0.756	1.317	1.337	0.944	1.861	1.01	0.675	1.151	1.366	1.101	1.061	0.677	1.733	1.06	1.155	1.029	0.789	1.351
Q9P287	1.259	1.083	2.024	1.607	0.62	0.436	0.48	0.894	1.765	2.227	1.482	2.414	1.742	0.802	0.524	1.153	2.047	2.654	1.519	1.189	0.819	1.808	1.303	1.634	0.723	1.298	1.546	1.432	0.856	0.744	1.189	0.842	1.582	1.509	0.939	2.384	1.079	0.691	1.211	1.495	1.205	1.233	0.719	1.584	1.315	1.152	1.081	0.754	1.323
O75396	1.326	1.12	2.115	1.519	0.63	0.484	0.552	0.949	1.829	2.178	1.143	2.071	1.535	0.747	0.41	1.025	1.533	2.183	1.473	1.113	0.811	1.838	1.228	1.428	0.683	1.258	1.386	1.415	0.797	0.688	1.041	0.773	1.332	1.39	0.841	1.941	1.122	0.705	1.137	1.438	1.062	1.143	0.629	1.691	1.19	1.134	1	0.692	1.188
P20020	1.402	1.193	2.323	1.778	0.789	0.628	0.694	1.061	2.285	2.549	1.081	1.846	1.428	0.781	0.461	0.858	1.614	2.116	1.39	1.198	0.851	1.81	1.315	1.565	0.816	1.449	1.449	1.297	0.728	0.654	1.053	0.756	1.3	1.307	0.875	2.035	1.076	0.728	1.187	1.453	1.1	1.234	0.647	1.882	1.158	1.205	1.049	0.799	1.316
O95747	1.478	1.185	2.384	1.937	0.751	0.519	0.591	0.993	2.079	2.135	1.283	2.039	1.592	0.791	0.52	1.068	1.872	2.272	1.216	1.12	0.857	1.769	1.348	1.992	0.902	1.427	1.733	1.391	0.846	0.787	1.132	0.813	1.566	1.399	1.02	2.175	1.096	0.716	1.274	1.414	1.249	1.33	0.783	1.659	1.392	1.213	1.111	0.859	1.286
P33316	1.326	1.164	2.431	1.951	0.829	0.607	0.596	0.987	2.252	1.976	1.105	1.786	1.177	0.678	0.461	0.924	1.614	1.866	1.552	1.141	0.877	1.872	1.167	1.448	0.72	1.331	1.349	1.314	0.78	0.728	1.077	0.764	1.374	1.358	0.926	2.018	1.009	0.703	1.2	1.342	1.077	1.236	0.802	1.769	1.116	1.08	0.967	0.836	1.148
P51003	1.259	1.193	2.208	1.609	0.763	0.648	0.623	1.112	2.205	1.795	1.256	2.211	1.532	0.723	0.505	0.96	1.884	2.531	1.175	1.152	0.806	1.817	1.411	1.625	0.953	1.474	1.578	1.368	0.77	0.702	1.025	0.788	1.378	1.392	0.925	1.986	0.944	0.668	1.17	1.32	1.052	1.132	0.758	1.557	1.229	1.123	1.029	0.822	1.288
O75351	1.338	1.154	2.238	1.674	0.75	0.571	0.587	1.002	2.056	2.1	1.133	1.825	1.369	0.72	0.449	0.921	1.641	2.082	1.368	1.165	0.852	1.761	1.194	1.582	0.749	1.379	1.467	1.36	0.774	0.69	1.065	0.81	1.409	1.36	0.915	1.965	1.036	0.661	1.173	1.369	1.075	1.166	0.666	1.733	1.155	1.181	1.124	0.833	1.398
A0A0A0MRM9	1.409	1.167	1.939	1.564	0.697	0.522	0.599	1.023	1.925	2.628	1.211	1.799	1.391	0.83	0.419	0.972	1.645	2.218	1.68	1.247	0.913	1.91	1.253	1.58	0.694	1.32	1.628	1.541	0.887	0.702	1.216	0.941	1.536	1.467	1.031	2.214	1.379	0.925	1.559	1.82	1.458	1.62	0.892	2.212	1.483	1.525	1.422	1.104	1.667
B1AXG1	1.29	1.087	2.334	1.974	0.685	0.348	0.406	1.024	2.17	0.974	1.075	2.318	1.782	0.471	0.446	1.283	2.209	2.456	1.273	1.193	0.817	1.944	1.372	1.504	0.958	1.362	1.861	1.304	0.752	0.66	1.036	0.798	1.446	1.433	0.955	2.055	1.192	0.796	1.356	1.736	1.253	1.395	0.811	2.156	1.374	1.291	1.1	0.796	1.364
F8VXU5	1.288	1.174	2.118	1.641	0.747	0.582	0.629	0.976	1.929	1.629	1.114	1.84	1.321	0.54	0.362	0.875	1.791	2.068	1.341	1.144	0.783	1.863	1.202	1.696	0.808	1.415	2.344	1.426	0.748	0.705	1.035	0.726	1.363	1.313	0.968	1.947	1.163	0.737	1.279	1.543	1.206	1.312	0.781	1.879	1.355	1.251	1.083	0.825	1.446
P49354	1.4	1.3	2.679	2.244	0.743	0.472	0.432	1.184	2.383	1.466	1.369	2.503	1.873	0.584	0.425	1.261	2.391	2.667	1.354	1.227	0.831	1.965	1.427	1.713	0.839	1.397	1.667	1.318	0.752	0.709	1.178	0.813	1.463	1.445	0.978	2.18	1.003	0.667	1.151	1.549	1.133	1.14	0.714	1.514	1.413	1.118	1.086	0.744	1.316
O75400	1.282	1.089	2.185	1.692	0.707	0.54	0.569	0.973	2.055	2.191	1.231	1.993	1.439	0.774	0.454	0.929	1.769	2.283	1.345	1.193	0.733	1.702	1.169	1.413	0.747	1.203	1.402	1.125	0.659	0.599	0.91	0.651	1.08	1.08	0.732	1.651	1.077	0.708	1.195	1.359	1.02	1.045	0.671	1.557	1.101	1.148	1.123	0.816	1.253
Q15427	1.301	1.015	2.034	1.57	0.672	0.547	0.66	0.902	1.829	2.609	1.258	2.203	1.482	0.86	0.532	0.998	1.809	2.369	1.494	1.045	0.87	1.842	1.059	1.423	0.67	1.283	1.352	1.254	0.735	0.701	1.029	0.804	1.339	1.262	0.934	1.855	1.152	0.731	1.334	1.43	1.153	1.332	0.863	2.092	1.295	1.251	1.137	0.844	1.448
O76071	1.329	1.121	2.007	1.531	0.745	0.603	0.588	0.959	1.807	2.379	1.249	2.078	1.465	0.833	0.459	1.026	1.879	2.316	1.479	1.165	0.882	1.943	1.304	1.684	0.778	1.516	1.531	1.307	0.87	0.709	1.272	0.821	1.472	1.377	0.889	2.232	1.054	0.677	1.225	1.435	1.119	1.204	0.729	1.766	1.414	1.305	1.184	0.865	1.445
[truncated: 2,499 more rows]
[truncated: 59 more columns]
