# Supplementary material for: The Emerging Plasticizer Alternative DINCH and Its Metabolite MINCH Induce Oxidative Stress and Enhance Inflammatory Responses in Human THP-1 Macrophages
Source: Cells. 2021 Sep 9;10(9):2367. doi: 10.3390/cells10092367 (PMC8466537; doi:10.3390/cells10092367)
Supplement: Supplementary file 1 [file cells-10-02367-s001.zip › Supplement 3.csv]

Accession	4h_DINCH_10nM_ctrlLPS	4h_DINCH_100nM_ctrlLPS	4h_DINCH_1000nM_ctrlLPS	4h_MINCH_10nM_ctrlLPS	4h_MINCH_100nM_ctrlLPS	4h_MINCH_1000nM_ctrlLPS	4h_MINCH_10000nM_ctrlLPS	4h_DINCH_10000nM_ctrlLPS	4h_DINCH_10nM_ctrlLPS	4h_DINCH_100nM_ctrlLPS	4h_DINCH_1000nM_ctrlLPS	4h_MINCH_10nM_ctrlLPS	4h_MINCH_100nM_ctrlLPS	4h_MINCH_1000nM_ctrlLPS	4h_MINCH_10000nM_ctrlLPS	4h_DINCH_10000nM_ctrlLPS	4h_DINCH_10nM_ctrlLPS	4h_DINCH_100nM_ctrlLPS	4h_DINCH_1000nM_ctrlLPS	4h_MINCH_10nM_ctrlLPS	4h_MINCH_100nM_ctrlLPS	4h_MINCH_1000nM_ctrlLPS	4h_MINCH_10000nM_ctrlLPS	4h_DINCH_10000nM_ctrlLPS	4h_DINCH_10nM_ctrlLPS	4h_DINCH_100nM_ctrlLPS	4h_DINCH_1000nM_ctrlLPS	4h_MINCH_10nM_ctrlLPS	4h_MINCH_100nM_ctrlLPS	4h_MINCH_1000nM_ctrlLPS	4h_MINCH_10000nM_ctrlLPS	4h_DINCH_10000nM_ctrlLPS	16h_DINCH_10nM_ctrlLPS	16h_DINCH_100nM_ctrlLPS	16h_DINCH_1000nM_ctrlLPS	16h_MINCH_10nM_ctrlLPS	16h_MINCH_100nM_ctrlLPS	16h_MINCH_1000nM_ctrlLPS	16h_MINCH_10000nM_ctrlLPS	16h_DINCH_10000nM_ctrlLPS	16h_DINCH_10nM_ctrlLPS	16h_DINCH_100nM_ctrlLPS	16h_DINCH_1000nM_ctrlLPS	16h_MINCH_10nM_ctrlLPS	16h_MINCH_100nM_ctrlLPS	16h_MINCH_1000nM_ctrlLPS	16h_MINCH_10000nM_ctrlLPS	16h_DINCH_10000nM_ctrlLPS	16h_DINCH_10nM_ctrlLPS
Q9Y490	0.871	1.627	1.276	0.503	0.382	0.439	0.756	1.487	0.558	0.951	0.688	0.331	0.197	0.469	0.861	1.059	0.795	0.54	1.229	0.842	1.036	0.488	0.874	1.008	0.546	0.478	0.782	0.557	0.976	0.95	0.626	1.432	0.638	1.092	1.363	1.03	1.061	0.565	1.646	1.15	0.917	0.632	1.12	0.593	0.569	0.5	0.803	0.689	0.877
P21333	0.818	1.486	1.148	0.499	0.371	0.43	0.685	1.334	0.507	0.833	0.611	0.319	0.189	0.391	0.718	0.924	0.757	0.534	1.201	0.796	0.998	0.466	0.851	0.934	0.543	0.481	0.772	0.548	0.959	0.929	0.621	1.389	0.63	1.076	1.315	0.985	1.061	0.598	1.626	1.113	0.9	0.671	1.1	0.622	0.544	0.464	0.811	0.68	0.796
P35579	0.803	1.555	1.215	0.468	0.353	0.405	0.725	1.375	0.58	1.021	0.703	0.336	0.191	0.447	0.841	1.082	0.744	0.504	1.182	0.792	0.948	0.438	0.804	0.926	0.549	0.486	0.775	0.536	0.942	0.898	0.603	1.415	0.609	1.09	1.339	1.014	1.034	0.592	1.555	1.108	0.874	0.651	1.07	0.614	0.529	0.452	0.789	0.682	0.805
Q14204	0.851	1.674	1.304	0.513	0.395	0.421	0.755	1.515	0.59	1.036	0.723	0.348	0.212	0.489	0.918	1.141	0.768	0.536	1.207	0.824	1.013	0.482	0.859	1.007	0.557	0.503	0.794	0.572	0.991	0.963	0.642	1.497	0.636	1.103	1.339	1.03	1.071	0.619	1.593	1.154	0.886	0.662	1.104	0.64	0.572	0.501	0.848	0.745	0.82
P78527	0.846	1.651	1.304	0.507	0.388	0.419	0.757	1.482	0.627	1.087	0.76	0.341	0.22	0.5	0.956	1.189	0.824	0.572	1.291	0.882	1.096	0.543	0.951	1.075	0.558	0.514	0.802	0.567	0.995	0.956	0.656	1.488	0.64	1.102	1.361	1.033	1.085	0.638	1.605	1.171	0.892	0.672	1.116	0.66	0.603	0.526	0.889	0.757	0.825
Q09666	0.854	1.648	1.219	0.506	0.389	0.442	0.761	1.486	0.568	0.969	0.681	0.351	0.209	0.451	0.816	1.025	0.77	0.538	1.151	0.841	1.042	0.48	0.876	0.964	0.565	0.5	0.743	0.56	0.986	0.935	0.633	1.389	0.65	0.987	1.329	0.949	1.014	0.57	1.488	1.031	0.909	0.72	1.093	0.632	0.566	0.486	0.789	0.68	0.915
P49327	0.849	1.632	1.265	0.507	0.399	0.427	0.746	1.475	0.575	0.978	0.694	0.339	0.211	0.469	0.873	1.083	0.777	0.541	1.231	0.829	1.037	0.489	0.886	1.007	0.544	0.494	0.771	0.546	0.969	0.921	0.621	1.435	0.617	1.083	1.316	0.994	1.056	0.617	1.569	1.124	0.884	0.666	1.088	0.647	0.584	0.505	0.864	0.733	0.821
A0A087WVQ6	0.853	1.642	1.322	0.501	0.369	0.413	0.751	1.497	0.606	1.031	0.72	0.329	0.201	0.494	0.944	1.129	0.779	0.525	1.23	0.826	1.02	0.479	0.881	1.012	0.559	0.489	0.784	0.551	0.978	0.947	0.639	1.436	0.62	1.104	1.349	1.033	1.1	0.631	1.611	1.142	0.895	0.669	1.076	0.643	0.57	0.495	0.834	0.718	0.863
P46940	0.854	1.698	1.348	0.502	0.369	0.422	0.751	1.506	0.589	1.047	0.731	0.338	0.206	0.468	0.895	1.126	0.768	0.517	1.196	0.809	0.995	0.461	0.831	0.969	0.541	0.496	0.784	0.542	0.95	0.902	0.603	1.434	0.631	1.08	1.34	1.005	1.056	0.6	1.564	1.144	0.884	0.648	1.103	0.613	0.554	0.475	0.815	0.712	0.852
O75369	0.848	1.663	1.269	0.523	0.408	0.451	0.754	1.524	0.53	0.902	0.652	0.328	0.196	0.426	0.807	1.014	0.792	0.57	1.237	0.829	1.067	0.495	0.919	1.06	0.566	0.494	0.787	0.577	1.024	0.988	0.687	1.457	0.653	1.119	1.334	1.038	1.113	0.644	1.691	1.154	0.914	0.7	1.148	0.68	0.61	0.533	0.945	0.768	0.842
P08238	0.812	1.573	1.237	0.492	0.38	0.433	0.731	1.413	0.516	0.851	0.586	0.305	0.185	0.426	0.769	0.904	0.717	0.476	1.129	0.741	0.915	0.415	0.773	0.867	0.533	0.467	0.76	0.524	0.932	0.898	0.587	1.373	0.59	1.054	1.287	0.955	1.039	0.581	1.566	1.074	0.869	0.651	1.096	0.613	0.54	0.461	0.809	0.673	0.784
P12814	0.871	1.732	1.372	0.51	0.388	0.424	0.813	1.576	0.559	0.985	0.679	0.328	0.195	0.468	0.897	1.069	0.731	0.523	1.219	0.806	0.985	0.449	0.841	1.013	0.559	0.496	0.783	0.57	0.998	0.943	0.64	1.475	0.636	1.099	1.392	1.049	1.089	0.623	1.613	1.188	0.904	0.663	1.147	0.666	0.59	0.507	0.877	0.762	0.859
O43707	0.847	1.575	1.274	0.498	0.372	0.416	0.769	1.472	0.566	0.946	0.673	0.324	0.185	0.466	0.874	1.091	0.763	0.533	1.21	0.831	1.008	0.462	0.871	1.016	0.55	0.477	0.76	0.549	0.964	0.898	0.608	1.445	0.642	1.093	1.402	1.054	1.07	0.627	1.634	1.2	0.89	0.654	1.137	0.643	0.566	0.493	0.84	0.736	0.853
P63261	0.848	1.517	1.181	0.521	0.402	0.486	0.704	1.422	0.49	0.825	0.589	0.317	0.195	0.62	0.781	0.917	0.796	0.534	1.205	0.842	1.008	0.491	0.86	0.937	0.566	0.479	0.8	0.559	0.951	0.937	0.613	1.396	0.647	1.081	1.318	1.017	1.03	0.595	1.61	1.09	0.907	0.641	1.144	0.64	0.548	0.504	0.83	0.675	0.882
P07900	0.861	1.709	1.36	0.523	0.386	0.416	0.747	1.522	0.553	0.952	0.663	0.312	0.193	0.439	0.816	1.003	0.747	0.51	1.189	0.793	0.984	0.454	0.837	0.945	0.553	0.491	0.782	0.546	0.983	0.943	0.625	1.436	0.613	1.08	1.328	1.009	1.067	0.604	1.588	1.133	0.872	0.656	1.107	0.63	0.546	0.469	0.825	0.703	0.813
P14618	0.866	1.645	1.31	0.521	0.387	0.443	0.73	1.481	0.541	0.918	0.63	0.309	0.191	0.443	0.824	0.984	0.8	0.537	1.266	0.851	1.028	0.485	0.853	0.978	0.541	0.472	0.791	0.543	0.964	0.918	0.622	1.406	0.628	1.079	1.354	1.02	1.042	0.607	1.543	1.142	0.894	0.656	1.118	0.634	0.54	0.462	0.813	0.697	0.829
P13796	0.862	1.602	1.259	0.5	0.37	0.426	0.809	1.422	0.587	0.984	0.712	0.333	0.208	0.507	0.917	1.066	0.834	0.549	1.268	0.875	1.071	0.499	0.911	1.043	0.539	0.469	0.796	0.56	0.974	0.957	0.614	1.42	0.641	1.095	1.389	1.059	1.082	0.61	1.604	1.204	0.91	0.64	1.134	0.625	0.567	0.497	0.806	0.698	0.861
P13639	0.852	1.626	1.29	0.51	0.366	0.422	0.724	1.431	0.577	0.97	0.675	0.33	0.204	0.446	0.827	1.041	0.773	0.521	1.206	0.808	1.007	0.46	0.838	0.969	0.552	0.493	0.792	0.539	0.945	0.901	0.609	1.432	0.621	1.093	1.339	0.995	1.043	0.591	1.587	1.128	0.908	0.662	1.1	0.622	0.548	0.476	0.802	0.697	0.829
P10809	0.873	1.713	1.345	0.511	0.384	0.421	0.749	1.532	0.551	0.949	0.66	0.314	0.208	0.432	0.863	1.025	0.763	0.501	1.151	0.795	0.972	0.469	0.832	0.918	0.528	0.464	0.755	0.534	0.949	0.932	0.625	1.406	0.623	1.079	1.31	0.996	1.053	0.608	1.655	1.129	0.908	0.662	1.128	0.616	0.539	0.463	0.827	0.676	0.853
Q01518	0.854	1.648	1.269	0.515	0.392	0.434	0.717	1.452	0.556	0.946	0.66	0.325	0.202	0.488	0.795	1.009	0.797	0.536	1.235	0.835	1.011	0.495	0.865	0.949	0.553	0.477	0.771	0.553	0.952	0.931	0.621	1.378	0.648	1.075	1.324	1.001	1.069	0.627	1.592	1.129	0.904	0.648	1.118	0.601	0.536	0.474	0.791	0.666	0.836
P11717	0.842	1.574	1.224	0.513	0.401	0.445	0.75	1.461	0.528	0.885	0.631	0.329	0.19	0.425	0.782	0.979	0.756	0.542	1.2	0.803	1.014	0.468	0.873	0.972	0.554	0.492	0.77	0.577	1.016	0.965	0.646	1.441	0.632	1.105	1.334	1.008	1.103	0.626	1.715	1.137	0.897	0.675	1.123	0.653	0.584	0.512	0.881	0.733	0.818
P11142	0.813	1.646	1.292	0.467	0.343	0.409	0.717	1.426	0.595	1.011	0.739	0.326	0.201	0.447	0.848	1.087	0.763	0.511	1.208	0.803	0.99	0.448	0.815	0.959	0.541	0.475	0.765	0.528	0.948	0.908	0.598	1.402	0.622	1.065	1.302	0.985	1.042	0.59	1.557	1.116	0.899	0.671	1.087	0.614	0.551	0.472	0.821	0.701	0.805
P68104	0.84	1.514	1.189	0.513	0.389	0.47	0.668	1.345	0.496	0.806	0.559	0.296	0.188	0.433	0.738	0.865	0.728	0.505	1.166	0.763	0.961	0.447	0.812	0.845	0.536	0.466	0.778	0.539	0.957	0.947	0.634	1.363	0.608	1.115	1.299	0.999	1.08	0.623	1.672	1.094	0.884	0.645	1.091	0.621	0.543	0.483	0.835	0.672	0.836
Q92616	0.861	1.707	1.305	0.521	0.406	0.406	0.762	1.555	0.628	1.094	0.775	0.331	0.235	0.476	0.958	1.226	0.899	0.621	1.377	1.005	1.219	0.645	1.069	1.143	0.582	0.517	0.802	0.595	1.058	1.044	0.704	1.534	0.663	1.114	1.344	1.046	1.113	0.673	1.574	1.21	0.933	0.695	1.153	0.686	0.664	0.621	0.98	0.834	0.854
P07814	0.865	1.735	1.383	0.519	0.389	0.422	0.758	1.569	0.579	1.017	0.701	0.327	0.192	0.467	0.901	1.085	0.805	0.559	1.315	0.884	1.081	0.506	0.942	1.082	0.566	0.491	0.802	0.58	1.027	0.989	0.666	1.501	0.622	1.1	1.351	1.033	1.068	0.637	1.598	1.179	0.867	0.644	1.098	0.613	0.546	0.474	0.818	0.719	0.834
P14625	0.822	1.571	1.246	0.47	0.363	0.417	0.721	1.39	0.559	0.998	0.692	0.328	0.193	0.45	0.866	1.058	0.743	0.5	1.179	0.79	0.959	0.443	0.807	0.907	0.525	0.463	0.756	0.515	0.893	0.849	0.562	1.373	0.615	1.06	1.319	0.978	1.04	0.589	1.561	1.095	0.87	0.637	1.097	0.6	0.523	0.447	0.778	0.68	0.83
P42704	0.866	1.696	1.28	0.512	0.402	0.43	0.766	1.539	0.634	1.134	0.825	0.352	0.222	0.559	0.991	1.235	0.837	0.575	1.284	0.894	1.136	0.532	0.95	1.081	0.564	0.51	0.781	0.569	1.012	0.975	0.635	1.476	0.652	1.027	1.346	0.966	1.003	0.604	1.53	1.146	0.921	0.655	1.115	0.635	0.598	0.532	0.842	0.719	0.864
Q15149	0.835	1.4	1.013	0.522	0.45	0.462	0.62	1.307	0.484	0.701	0.496	0.305	0.191	0.415	0.636	0.844	0.732	0.628	1.214	0.793	1.081	0.468	0.859	1.153	0.767	0.609	0.837	0.609	1.076	1.161	0.731	1.83	0.962	1.113	1.347	0.996	1.206	0.67	1.714	1.208	0.855	0.717	1.142	0.621	0.602	0.509	0.902	1.03	0.824
P06733	0.865	1.721	1.354	0.489	0.367	0.4	0.72	1.491	0.633	1.135	0.759	0.345	0.226	0.466	0.901	1.182	0.794	0.52	1.186	0.831	0.977	0.479	0.828	0.933	0.535	0.474	0.75	0.512	0.902	0.873	0.587	1.358	0.63	1.074	1.299	0.98	1.026	0.598	1.493	1.115	0.904	0.665	1.083	0.599	0.538	0.462	0.778	0.683	0.839
P38646	0.827	1.518	1.217	0.487	0.376	0.437	0.773	1.413	0.553	0.929	0.662	0.332	0.186	0.451	0.845	1.022	0.803	0.549	1.228	0.851	1.045	0.485	0.857	1.052	0.553	0.48	0.789	0.574	1.004	0.963	0.631	1.433	0.65	1.103	1.365	1.02	1.047	0.573	1.651	1.158	0.889	0.655	1.116	0.6	0.535	0.46	0.807	0.689	0.875
Q9Y4L1	0.854	1.69	1.305	0.508	0.391	0.432	0.748	1.513	0.594	1.057	0.748	0.34	0.203	0.494	0.895	1.149	0.798	0.545	1.227	0.847	1.036	0.484	0.864	1.025	0.548	0.489	0.795	0.546	0.962	0.937	0.6	1.458	0.638	1.093	1.34	1.009	1.039	0.594	1.604	1.144	0.901	0.646	1.096	0.606	0.545	0.482	0.807	0.707	0.858
P11021	0.864	1.666	1.323	0.489	0.357	0.413	0.794	1.498	0.601	1.05	0.728	0.327	0.192	0.493	0.933	1.121	0.825	0.551	1.28	0.879	1.07	0.494	0.898	1.07	0.543	0.485	0.799	0.567	1.001	0.963	0.629	1.43	0.637	1.092	1.35	1.04	1.062	0.617	1.569	1.162	0.899	0.664	1.12	0.636	0.554	0.481	0.818	0.707	0.842
P34932	0.86	1.681	1.315	0.507	0.375	0.424	0.761	1.525	0.586	1.03	0.713	0.331	0.202	0.478	0.915	1.112	0.764	0.514	1.21	0.823	1.021	0.444	0.814	0.995	0.541	0.474	0.783	0.54	0.945	0.911	0.59	1.456	0.647	1.092	1.363	1.012	1.038	0.584	1.596	1.162	0.893	0.664	1.118	0.614	0.552	0.47	0.797	0.728	0.852
P04406	0.872	1.649	1.315	0.523	0.372	0.44	0.681	1.481	0.559	0.948	0.658	0.328	0.201	0.463	0.82	1.025	0.806	0.532	1.228	0.845	1.017	0.47	0.837	0.932	0.535	0.465	0.765	0.535	0.911	0.894	0.599	1.366	0.629	1.079	1.32	1	1.04	0.59	1.583	1.107	0.922	0.665	1.127	0.637	0.576	0.496	0.839	0.703	0.825
P07437	0.887	1.728	1.376	0.527	0.395	0.43	0.765	1.565	0.607	1.043	0.73	0.324	0.196	0.531	0.981	1.15	0.821	0.562	1.323	0.892	1.098	0.531	0.949	1.046	0.569	0.493	0.802	0.575	1.005	0.986	0.66	1.439	0.615	1.124	1.397	1.077	1.102	0.657	1.632	1.19	0.882	0.649	1.116	0.671	0.572	0.507	0.877	0.746	0.842
P13010	0.853	1.599	1.252	0.502	0.381	0.428	0.711	1.408	0.561	0.983	0.668	0.341	0.204	0.441	0.792	1.033	0.783	0.518	1.208	0.809	0.955	0.455	0.794	0.901	0.552	0.498	0.792	0.533	0.93	0.905	0.603	1.442	0.618	1.037	1.326	0.968	1.015	0.579	1.545	1.065	0.911	0.662	1.097	0.63	0.543	0.473	0.804	0.676	0.801
P53621	0.847	1.643	1.288	0.507	0.376	0.411	0.745	1.474	0.606	1.008	0.712	0.352	0.21	0.462	0.847	1.108	0.79	0.533	1.229	0.831	1.016	0.504	0.892	0.994	0.553	0.504	0.782	0.555	0.955	0.945	0.644	1.435	0.626	1.081	1.329	1.023	1.055	0.623	1.563	1.139	0.889	0.656	1.083	0.636	0.567	0.498	0.854	0.722	0.809
Q96BY6	0.83	1.566	1.221	0.503	0.395	0.436	0.723	1.437	0.539	0.916	0.668	0.341	0.214	0.426	0.772	1.043	0.773	0.556	1.235	0.815	1.035	0.503	0.909	1	0.555	0.52	0.77	0.56	0.99	0.962	0.65	1.458	0.629	1.089	1.29	1	1.104	0.638	1.638	1.127	0.914	0.691	1.133	0.661	0.613	0.529	0.892	0.748	0.805
Q71U36	0.837	1.513	1.202	0.496	0.357	0.434	0.639	1.302	0.547	0.902	0.637	0.328	0.2	0.396	0.705	0.956	0.761	0.503	1.122	0.781	0.929	0.447	0.751	0.821	0.546	0.484	0.757	0.529	0.896	0.853	0.568	1.351	0.641	1.072	1.283	0.972	0.999	0.58	1.494	1.055	0.896	0.66	1.058	0.603	0.522	0.455	0.764	0.681	0.81
P53396	0.868	1.666	1.325	0.505	0.378	0.418	0.755	1.475	0.588	1.013	0.708	0.331	0.209	0.479	0.883	1.098	0.774	0.528	1.23	0.814	1.01	0.469	0.838	1.004	0.547	0.494	0.79	0.548	0.953	0.916	0.609	1.461	0.641	1.109	1.349	1.02	1.072	0.619	1.612	1.154	0.887	0.657	1.099	0.63	0.564	0.501	0.836	0.733	0.827
P06576	0.867	1.669	1.324	0.508	0.367	0.424	0.732	1.503	0.597	1.021	0.71	0.335	0.221	0.484	0.904	1.106	0.817	0.53	1.252	0.854	1.042	0.513	0.897	0.977	0.545	0.488	0.77	0.541	0.948	0.935	0.616	1.423	0.635	1.086	1.319	1.01	1.03	0.61	1.556	1.124	0.917	0.667	1.108	0.639	0.558	0.494	0.819	0.717	0.817
P06396	0.817	1.585	1.233	0.491	0.383	0.423	0.788	1.428	0.552	0.933	0.623	0.324	0.197	0.441	0.84	1.01	0.762	0.528	1.213	0.804	0.97	0.46	0.857	0.949	0.558	0.495	0.778	0.541	0.952	0.918	0.614	1.419	0.632	1.081	1.31	1.007	1.065	0.593	1.601	1.104	0.869	0.674	1.122	0.64	0.547	0.461	0.812	0.691	0.839
P68371	0.903	1.916	1.547	0.5	0.328	0.402	0.748	1.58	0.626	1.133	0.753	0.314	0.179	0.501	0.974	1.16	0.845	0.551	1.27	0.901	1.109	0.512	0.916	1.016	0.544	0.491	0.823	0.561	0.951	0.898	0.612	1.46	0.64	1.081	1.413	1.027	0.992	0.579	1.539	1.165	0.872	0.642	1.041	0.579	0.488	0.434	0.722	0.675	0.86
D3DSM0	0.916	1.387	1.168	0.524	0.348	0.399	0.677	1.141	0.517	0.731	0.583	0.308	0.185	0.482	0.74	0.848	0.67	0.44	1.016	0.713	0.753	0.377	0.675	0.635	0.548	0.45	0.739	0.603	0.868	0.933	0.607	1.26	0.674	1.083	1.334	1.13	1.028	0.662	1.4	1.066	0.939	0.653	1.107	0.656	0.497	0.466	0.76	0.681	0.925
P07237	0.862	1.617	1.288	0.504	0.37	0.42	0.734	1.432	0.573	0.971	0.676	0.336	0.21	0.438	0.824	1.034	0.758	0.491	1.119	0.775	0.924	0.433	0.754	0.866	0.53	0.452	0.75	0.527	0.91	0.882	0.576	1.37	0.623	1.066	1.31	0.966	0.999	0.567	1.533	1.101	0.905	0.656	1.105	0.58	0.528	0.441	0.749	0.663	0.839
O75643	0.832	1.687	1.321	0.504	0.38	0.396	0.735	1.513	0.641	1.128	0.791	0.334	0.212	0.494	0.948	1.246	0.803	0.55	1.255	0.846	1.025	0.523	0.887	1.027	0.558	0.481	0.79	0.539	0.924	0.9	0.618	1.447	0.623	1.087	1.36	1.02	1.063	0.644	1.557	1.127	0.897	0.669	1.081	0.624	0.569	0.5	0.841	0.737	0.839
P05107	0.839	1.563	1.222	0.481	0.367	0.429	0.772	1.424	0.57	0.933	0.689	0.331	0.191	0.472	0.831	1.031	0.795	0.526	1.191	0.842	1.02	0.474	0.87	0.988	0.534	0.471	0.784	0.556	0.961	0.933	0.623	1.433	0.632	1.08	1.361	1.014	1.034	0.563	1.577	1.115	0.901	0.646	1.125	0.605	0.571	0.479	0.806	0.684	0.877
P18206	0.877	1.637	1.255	0.525	0.404	0.459	0.777	1.509	0.591	1.016	0.737	0.358	0.212	0.482	0.911	1.127	0.817	0.57	1.227	0.88	1.085	0.511	0.915	1.105	0.551	0.487	0.775	0.556	0.954	0.932	0.614	1.456	0.655	1.093	1.334	1.027	1.071	0.596	1.599	1.162	0.916	0.655	1.119	0.625	0.599	0.515	0.841	0.728	0.891
P26640	0.853	1.677	1.316	0.518	0.386	0.41	0.763	1.539	0.551	0.925	0.671	0.335	0.207	0.462	0.846	1.041	0.794	0.55	1.255	0.854	1.073	0.491	0.919	1.064	0.576	0.506	0.83	0.59	1.063	1.011	0.674	1.529	0.617	1.117	1.431	1.066	1.121	0.651	1.702	1.214	0.897	0.674	1.136	0.674	0.621	0.525	0.926	0.775	0.836
P55072	0.876	1.776	1.412	0.512	0.378	0.421	0.756	1.588	0.631	1.137	0.8	0.349	0.212	0.496	0.94	1.242	0.762	0.519	1.183	0.825	0.989	0.466	0.82	0.966	0.564	0.508	0.807	0.559	0.986	0.935	0.634	1.486	0.637	1.091	1.374	1.029	1.048	0.613	1.564	1.185	0.899	0.655	1.1	0.637	0.555	0.48	0.823	0.735	0.82
P33176	0.862	1.643	1.265	0.519	0.427	0.453	0.796	1.516	0.501	0.806	0.566	0.324	0.182	0.437	0.766	0.908	0.717	0.524	1.201	0.779	0.992	0.437	0.864	0.997	0.563	0.501	0.815	0.564	1.03	0.992	0.658	1.505	0.625	1.155	1.393	1.072	1.162	0.66	1.753	1.196	0.875	0.661	1.142	0.658	0.584	0.503	0.877	0.729	0.851
Q92598	0.871	1.683	1.322	0.529	0.417	0.448	0.763	1.528	0.572	1.022	0.723	0.348	0.205	0.485	0.915	1.127	0.801	0.55	1.299	0.883	1.09	0.507	0.941	1.06	0.552	0.485	0.8	0.583	0.993	0.984	0.659	1.494	0.638	1.096	1.368	1.03	1.085	0.611	1.609	1.175	0.916	0.662	1.137	0.641	0.578	0.509	0.856	0.723	0.872
P09874	0.803	1.568	1.207	0.481	0.361	0.401	0.658	1.403	0.598	1.007	0.689	0.316	0.193	0.42	0.832	1.126	0.716	0.488	1.133	0.731	0.956	0.451	0.796	0.926	0.523	0.467	0.764	0.522	0.892	0.889	0.592	1.398	0.598	1.063	1.279	0.957	1.066	0.603	1.596	1.156	0.86	0.67	1.153	0.638	0.575	0.498	0.869	0.734	0.825
P27797	0.832	1.536	1.194	0.496	0.397	0.432	0.892	1.43	0.553	0.934	0.666	0.322	0.192	0.459	0.909	1.015	0.72	0.516	1.21	0.782	0.986	0.434	0.813	1.049	0.546	0.471	0.79	0.551	1.009	0.96	0.632	1.442	0.608	1.08	1.363	1.013	1.107	0.608	1.65	1.139	0.849	0.648	1.123	0.644	0.574	0.468	0.796	0.712	0.858
P78371	0.858	1.569	1.222	0.512	0.37	0.422	0.696	1.356	0.577	0.971	0.705	0.346	0.202	0.47	0.807	1.063	0.823	0.555	1.232	0.879	1.026	0.505	0.867	0.934	0.541	0.476	0.782	0.547	0.938	0.909	0.6	1.4	0.641	1.093	1.331	1.03	1.018	0.591	1.542	1.104	0.919	0.643	1.098	0.617	0.53	0.47	0.786	0.684	0.873
Q6P2Q9	0.825	1.706	1.304	0.503	0.387	0.4	0.749	1.543	0.652	1.157	0.791	0.349	0.231	0.512	0.989	1.276	0.886	0.593	1.334	0.937	1.161	0.595	1.032	1.155	0.571	0.524	0.82	0.588	1.044	1.015	0.689	1.534	0.632	1.1	1.32	1.008	1.121	0.669	1.628	1.157	0.907	0.66	1.089	0.646	0.614	0.544	0.915	0.746	0.844
Q9BSJ8	0.878	1.734	1.353	0.508	0.393	0.424	0.789	1.54	0.643	1.134	0.801	0.347	0.215	0.535	0.964	1.228	0.803	0.568	1.229	0.884	1.09	0.517	0.949	1.007	0.558	0.5	0.795	0.574	0.991	0.958	0.644	1.475	0.635	1.099	1.386	1.028	1.099	0.649	1.593	1.175	0.884	0.672	1.107	0.641	0.572	0.485	0.823	0.751	0.844
P31939	0.878	1.715	1.353	0.522	0.401	0.435	0.769	1.576	0.612	1.042	0.729	0.346	0.214	0.491	0.911	1.167	0.806	0.548	1.282	0.858	1.05	0.507	0.917	1.022	0.554	0.485	0.802	0.561	0.984	0.955	0.632	1.476	0.611	1.095	1.321	1.026	1.051	0.625	1.602	1.133	0.916	0.652	1.127	0.634	0.553	0.493	0.842	0.711	0.834
Q9P2E9	0.752	1.463	1.169	0.478	0.385	0.413	0.651	1.37	0.467	0.809	0.583	0.32	0.178	0.371	0.673	0.972	0.696	0.496	1.144	0.734	0.913	0.424	0.8	0.978	0.546	0.481	0.81	0.591	0.983	0.993	0.661	1.458	0.607	1.097	1.339	1.015	1.095	0.582	1.675	1.123	0.884	0.653	1.103	0.603	0.564	0.48	0.811	0.677	0.868
P26038	0.858	1.706	1.346	0.492	0.377	0.431	0.807	1.545	0.573	1.005	0.691	0.318	0.192	0.467	0.905	1.075	0.766	0.525	1.261	0.856	1.038	0.461	0.853	1.051	0.549	0.484	0.801	0.558	0.979	0.948	0.631	1.444	0.611	1.071	1.374	1.007	1.029	0.593	1.612	1.147	0.868	0.646	1.105	0.609	0.539	0.469	0.811	0.705	0.831
P12956	0.819	1.54	1.208	0.473	0.358	0.409	0.712	1.336	0.578	1.015	0.699	0.34	0.21	0.426	0.807	1.051	0.788	0.537	1.237	0.822	0.983	0.474	0.846	0.935	0.575	0.519	0.788	0.565	0.977	0.957	0.644	1.458	0.617	1.055	1.3	0.985	1.035	0.594	1.521	1.051	0.901	0.644	1.096	0.624	0.554	0.486	0.838	0.673	0.842
P15311	0.841	1.674	1.301	0.485	0.364	0.407	0.742	1.464	0.567	0.996	0.668	0.315	0.194	0.448	0.876	1.037	0.728	0.484	1.14	0.768	0.925	0.426	0.77	0.922	0.545	0.478	0.77	0.535	0.92	0.902	0.596	1.399	0.594	1.087	1.346	0.984	1.024	0.582	1.567	1.122	0.876	0.656	1.109	0.616	0.557	0.476	0.81	0.705	0.811
P50395	0.839	1.603	1.276	0.49	0.361	0.424	0.746	1.42	0.584	1.02	0.704	0.335	0.199	0.474	0.865	1.074	0.778	0.518	1.199	0.825	0.98	0.469	0.831	0.963	0.54	0.491	0.781	0.523	0.925	0.883	0.591	1.413	0.633	1.059	1.338	1.003	1.02	0.599	1.538	1.15	0.901	0.66	1.113	0.645	0.572	0.487	0.835	0.725	0.871
Q13200	0.851	1.652	1.302	0.513	0.381	0.42	0.757	1.526	0.584	0.995	0.71	0.348	0.203	0.461	0.87	1.112	0.791	0.558	1.294	0.871	1.079	0.5	0.916	1.053	0.565	0.497	0.789	0.585	1.023	0.975	0.664	1.478	0.623	1.094	1.36	1.03	1.095	0.637	1.648	1.162	0.89	0.647	1.126	0.641	0.581	0.518	0.876	0.734	0.842
Q14697	0.83	1.677	1.293	0.504	0.402	0.455	0.799	1.506	0.536	0.935	0.632	0.325	0.208	0.444	0.815	1.009	0.745	0.528	1.257	0.798	1.021	0.467	0.866	1.025	0.551	0.496	0.8	0.553	1.007	0.966	0.641	1.462	0.62	1.112	1.395	1.04	1.119	0.623	1.653	1.172	0.869	0.648	1.111	0.656	0.567	0.482	0.857	0.714	0.831
F5H5D3	0.974	1.752	1.525	0.591	0.37	0.37	0.861	1.685	0.518	0.806	0.625	0.284	0.147	0.478	0.834	0.895	1.093	0.747	1.618	1.261	1.362	0.917	1.258	1.516	0.577	0.495	0.785	0.619	0.918	0.976	0.647	1.148	0.541	1.146	1.357	1.12	0.962	0.772	1.283	1.012	0.805	0.646	1.108	0.69	0.623	0.575	0.907	0.819	0.924
P00558	0.882	1.648	1.265	0.505	0.367	0.407	0.747	1.397	0.585	1.03	0.711	0.345	0.21	0.451	0.862	1.072	0.841	0.568	1.247	0.936	1.101	0.503	0.904	1.081	0.553	0.476	0.779	0.549	0.922	0.884	0.61	1.394	0.68	1.085	1.372	1.024	1.026	0.579	1.497	1.147	0.925	0.661	1.128	0.591	0.564	0.484	0.793	0.694	0.904
P48643	0.848	1.65	1.307	0.485	0.346	0.39	0.729	1.428	0.591	1.046	0.718	0.335	0.204	0.466	0.88	1.114	0.807	0.538	1.236	0.852	1.026	0.479	0.839	1.009	0.555	0.496	0.78	0.544	0.943	0.901	0.61	1.427	0.646	1.082	1.297	0.995	1.018	0.599	1.537	1.118	0.909	0.667	1.117	0.637	0.55	0.479	0.833	0.715	0.833
H3BR70	0.874	1.661	1.341	0.577	0.456	0.38	0.952	1.608	0.893	1.41	0.971	0.399	0.314	0.529	1.043	1.614	0.629	0.39	0.931	0.634	0.749	0.328	0.599	0.705	0.502	0.442	0.824	0.5	0.84	0.834	0.582	1.393	0.603	1.117	1.371	1.082	0.997	0.664	1.484	1.223	1.137	0.843	1.223	0.843	0.85	0.642	1.036	0.936	0.926
H0YFD6	0.862	1.732	1.378	0.51	0.377	0.424	0.765	1.58	0.589	1.037	0.723	0.347	0.211	0.444	0.841	1.136	0.818	0.544	1.244	0.859	1.05	0.509	0.902	1.022	0.551	0.493	0.781	0.555	0.986	0.932	0.633	1.497	0.673	1.123	1.365	1.035	1.086	0.63	1.638	1.207	0.911	0.676	1.113	0.624	0.573	0.48	0.845	0.728	0.833
P53618	0.846	1.696	1.343	0.524	0.38	0.395	0.759	1.515	0.651	1.155	0.836	0.351	0.231	0.548	1.064	1.289	0.79	0.551	1.27	0.863	1.058	0.498	0.905	1.033	0.564	0.516	0.806	0.57	1.009	0.969	0.654	1.497	0.632	1.106	1.383	1.026	1.053	0.631	1.548	1.164	0.913	0.661	1.13	0.677	0.583	0.524	0.886	0.755	0.826
Q04637	0.833	1.568	1.233	0.5	0.391	0.437	0.763	1.432	0.529	0.88	0.635	0.328	0.193	0.435	0.792	0.985	0.754	0.519	1.195	0.811	0.993	0.461	0.849	0.986	0.549	0.488	0.801	0.571	0.996	0.974	0.655	1.475	0.647	1.086	1.386	1.037	1.098	0.578	1.709	1.173	0.887	0.658	1.156	0.637	0.597	0.519	0.86	0.735	0.878
P08670	1.04	1.492	0.97	0.449	0.366	0.366	0.544	1.18	0.699	0.881	0.639	0.248	0.152	0.425	0.664	0.967	0.662	0.609	0.984	0.548	1.179	0.348	0.572	1.215	0.599	0.546	0.732	0.383	0.9	0.724	0.515	1.467	1.631	0.947	1.28	0.892	0.923	0.507	1.456	1.167	0.644	0.76	1.07	0.497	0.499	0.373	0.787	1.626	0.626
Q14152	0.83	1.63	1.264	0.507	0.398	0.442	0.764	1.484	0.607	1.033	0.728	0.342	0.214	0.504	0.952	1.148	0.803	0.575	1.313	0.888	1.115	0.53	0.965	1.083	0.572	0.514	0.823	0.573	1.037	0.996	0.67	1.532	0.631	1.124	1.398	1.064	1.123	0.662	1.662	1.22	0.914	0.672	1.139	0.686	0.634	0.549	0.952	0.789	0.857
P04075	0.864	1.63	1.245	0.517	0.397	0.45	0.764	1.386	0.514	0.85	0.608	0.32	0.201	0.457	0.752	0.86	0.719	0.499	1.073	0.756	0.905	0.416	0.777	0.841	0.554	0.466	0.738	0.553	0.957	0.935	0.61	1.342	0.628	1.027	1.304	0.988	1.044	0.557	1.674	1.037	0.919	0.645	1.136	0.602	0.564	0.488	0.814	0.652	0.84
P52272	0.856	1.804	1.407	0.496	0.364	0.434	0.783	1.631	0.604	1.108	0.745	0.332	0.206	0.524	0.964	1.17	0.767	0.527	1.282	0.827	1.076	0.443	0.855	1.152	0.552	0.506	0.803	0.54	0.992	0.919	0.62	1.523	0.624	1.075	1.416	1.005	1.011	0.581	1.62	1.202	0.909	0.666	1.12	0.644	0.577	0.489	0.879	0.761	0.843
O14980	0.83	1.547	1.192	0.47	0.365	0.416	0.734	1.345	0.59	1.016	0.719	0.337	0.218	0.472	0.885	1.083	0.809	0.537	1.223	0.848	1.043	0.497	0.874	1.012	0.554	0.497	0.794	0.557	0.95	0.926	0.611	1.411	0.64	1.008	1.334	0.976	0.971	0.561	1.456	1.137	0.91	0.629	1.097	0.591	0.56	0.489	0.786	0.718	0.864
P49588	0.867	1.692	1.333	0.504	0.375	0.414	0.762	1.503	0.593	1.042	0.725	0.346	0.211	0.465	0.87	1.106	0.783	0.535	1.2	0.824	1.01	0.458	0.807	0.972	0.536	0.468	0.769	0.553	0.937	0.91	0.604	1.421	0.643	1.102	1.311	0.974	1.032	0.574	1.638	1.11	0.937	0.68	1.154	0.622	0.585	0.51	0.849	0.735	0.845
Q7KZF4	0.838	1.641	1.249	0.501	0.391	0.431	0.767	1.473	0.552	0.971	0.668	0.333	0.191	0.445	0.836	1.059	0.745	0.519	1.175	0.785	0.96	0.45	0.832	0.988	0.56	0.501	0.789	0.56	0.981	0.953	0.632	1.468	0.606	1.111	1.337	1.024	1.09	0.635	1.662	1.137	0.906	0.669	1.108	0.645	0.568	0.489	0.841	0.715	0.857
P22314	0.839	1.59	1.261	0.52	0.389	0.427	0.762	1.455	0.587	0.979	0.702	0.341	0.222	0.493	0.866	1.099	0.794	0.559	1.23	0.866	1.05	0.514	0.934	0.959	0.569	0.505	0.793	0.56	0.997	0.98	0.652	1.463	0.615	1.082	1.31	1.004	1.05	0.613	1.568	1.127	0.925	0.7	1.153	0.659	0.606	0.523	0.9	0.74	0.828
P68366	0.881	1.713	1.289	0.51	0.402	0.473	0.722	1.531	0.596	1.043	0.711	0.335	0.213	0.529	0.852	1.139	0.702	0.473	1.064	0.734	0.889	0.453	0.721	0.834	0.556	0.527	0.78	0.536	0.943	0.898	0.614	1.488	0.609	1.101	1.321	0.974	1.028	0.608	1.498	1.156	0.902	0.675	1.06	0.587	0.504	0.452	0.724	0.682	0.821
O75083	0.872	1.644	1.305	0.518	0.369	0.42	0.699	1.435	0.533	0.895	0.636	0.317	0.185	0.414	0.749	0.969	0.748	0.526	1.213	0.784	0.962	0.448	0.842	0.889	0.545	0.48	0.785	0.544	0.934	0.903	0.596	1.408	0.621	1.079	1.309	0.995	1.074	0.615	1.603	1.105	0.889	0.675	1.118	0.652	0.56	0.482	0.85	0.722	0.832
Q13813	0.844	1.569	1.215	0.519	0.421	0.454	0.762	1.479	0.537	0.829	0.599	0.313	0.199	0.43	0.783	0.981	0.782	0.563	1.22	0.831	1.045	0.517	0.919	1.061	0.547	0.487	0.762	0.555	0.999	1.05	0.651	1.548	0.642	1.138	1.361	1.047	1.193	0.668	1.791	1.215	0.905	0.677	1.147	0.66	0.599	0.536	0.896	0.778	0.837
Q9Y678	0.856	1.67	1.331	0.525	0.415	0.448	0.735	1.524	0.573	0.997	0.707	0.344	0.223	0.47	0.85	1.114	0.793	0.554	1.233	0.836	1.041	0.512	0.874	1.009	0.562	0.5	0.799	0.562	1.026	0.98	0.667	1.484	0.615	1.11	1.333	1.011	1.111	0.65	1.676	1.15	0.905	0.672	1.141	0.668	0.599	0.532	0.92	0.751	0.832
P05023	0.869	1.656	1.306	0.518	0.408	0.44	0.774	1.544	0.584	0.986	0.715	0.343	0.215	0.479	0.878	1.101	0.764	0.538	1.207	0.825	1.048	0.469	0.882	1.051	0.571	0.52	0.806	0.587	1.071	1.009	0.692	1.535	0.647	1.137	1.385	1.068	1.167	0.643	1.756	1.22	0.901	0.675	1.101	0.648	0.619	0.521	0.903	0.765	0.853
Q86UX7	0.851	1.69	1.364	0.498	0.366	0.395	0.768	1.518	0.618	1.063	0.736	0.328	0.203	0.502	0.969	1.132	0.751	0.501	1.152	0.796	0.935	0.442	0.803	0.915	0.552	0.504	0.785	0.551	0.94	0.902	0.617	1.422	0.628	1.101	1.377	1.044	1.062	0.616	1.539	1.147	0.88	0.665	1.087	0.642	0.544	0.47	0.8	0.715	0.836
P29401	0.835	1.559	1.226	0.497	0.37	0.421	0.686	1.398	0.552	0.908	0.631	0.319	0.196	0.398	0.768	0.965	0.744	0.525	1.18	0.763	0.941	0.435	0.798	0.878	0.546	0.483	0.771	0.524	0.958	0.906	0.601	1.39	0.631	1.065	1.307	0.979	1.054	0.602	1.61	1.115	0.908	0.651	1.129	0.623	0.547	0.471	0.829	0.693	0.802
P50990	0.833	1.617	1.264	0.493	0.362	0.421	0.681	1.399	0.56	0.959	0.651	0.326	0.192	0.433	0.764	1.023	0.771	0.513	1.163	0.803	0.954	0.44	0.79	0.893	0.543	0.481	0.767	0.529	0.909	0.873	0.575	1.394	0.657	1.087	1.33	0.992	1.024	0.594	1.584	1.111	0.898	0.665	1.081	0.606	0.53	0.465	0.798	0.684	0.839
Q6ZS81	0.844	1.635	1.274	0.528	0.418	0.432	0.761	1.563	0.572	0.977	0.703	0.353	0.222	0.483	0.867	1.126	0.804	0.574	1.291	0.881	1.113	0.544	0.98	1.048	0.555	0.513	0.792	0.557	0.99	0.953	0.669	1.488	0.663	1.126	1.382	1.063	1.156	0.649	1.667	1.225	0.886	0.67	1.119	0.657	0.596	0.507	0.862	0.759	0.866
P29350	0.842	1.695	1.338	0.494	0.382	0.406	0.782	1.491	0.545	0.964	0.67	0.325	0.186	0.475	0.859	1.041	0.748	0.53	1.224	0.808	0.986	0.464	0.891	0.977	0.557	0.494	0.807	0.567	0.993	0.958	0.647	1.449	0.619	1.112	1.392	1.053	1.103	0.625	1.654	1.147	0.861	0.654	1.111	0.654	0.567	0.487	0.842	0.726	0.847
P50991	0.848	1.621	1.265	0.489	0.374	0.436	0.714	1.428	0.574	0.987	0.699	0.342	0.21	0.476	0.834	1.092	0.74	0.514	1.154	0.782	0.96	0.443	0.8	0.932	0.552	0.484	0.784	0.541	0.964	0.929	0.617	1.4	0.631	1.084	1.343	1.048	1.061	0.604	1.647	1.154	0.912	0.658	1.128	0.654	0.569	0.491	0.844	0.713	0.857
P02545	0.766	1.54	1.214	0.479	0.377	0.431	0.663	1.352	0.493	0.94	0.68	0.283	0.187	0.464	0.787	0.974	0.71	0.483	1.287	0.76	0.948	0.486	0.807	1.009	0.525	0.45	0.879	0.516	0.873	0.951	0.618	1.322	0.462	0.85	1.222	0.788	1.019	0.517	1.463	1.057	0.699	0.537	0.997	0.509	0.547	0.443	0.827	0.693	0.677
Q9NYU2	0.878	1.627	1.296	0.518	0.4	0.426	0.745	1.463	0.598	0.99	0.703	0.351	0.21	0.465	0.862	1.111	0.774	0.523	1.189	0.802	0.996	0.473	0.838	0.976	0.566	0.518	0.809	0.576	0.973	0.967	0.65	1.489	0.652	1.126	1.359	1.05	1.101	0.629	1.675	1.202	0.892	0.681	1.122	0.655	0.574	0.492	0.853	0.73	0.865
P30101	0.875	1.63	1.302	0.509	0.396	0.429	0.778	1.465	0.584	1.004	0.731	0.331	0.195	0.497	0.897	1.104	0.795	0.539	1.213	0.845	1.011	0.481	0.867	1	0.56	0.489	0.775	0.565	0.974	0.922	0.62	1.407	0.634	1.096	1.334	1.018	1.065	0.606	1.604	1.132	0.888	0.659	1.122	0.636	0.557	0.469	0.808	0.704	0.866
Q86VP6	0.841	1.579	1.25	0.515	0.387	0.407	0.69	1.415	0.564	0.935	0.673	0.329	0.21	0.418	0.815	1.038	0.827	0.571	1.252	0.884	1.054	0.544	0.908	1.002	0.547	0.498	0.781	0.564	0.968	0.96	0.639	1.447	0.638	1.083	1.337	1.039	1.061	0.633	1.604	1.134	0.934	0.648	1.094	0.649	0.582	0.512	0.855	0.735	0.829
Q7L576	0.876	1.698	1.329	0.514	0.409	0.41	0.787	1.556	0.708	1.213	0.859	0.366	0.244	0.584	1.095	1.359	0.87	0.595	1.393	0.965	1.214	0.584	1.067	1.17	0.58	0.527	0.813	0.59	1.056	1.02	0.707	1.524	0.654	1.124	1.369	1.062	1.108	0.668	1.613	1.2	0.936	0.698	1.149	0.702	0.628	0.556	0.931	0.79	0.839
O00410	0.911	1.773	1.309	0.539	0.42	0.46	0.802	1.57	0.572	0.988	0.713	0.343	0.216	0.487	0.864	1.081	0.828	0.558	1.223	0.885	1.088	0.518	0.916	1.019	0.533	0.481	0.764	0.557	0.976	0.958	0.601	1.406	0.634	1.09	1.415	1.027	1.026	0.612	1.565	1.154	0.921	0.659	1.131	0.641	0.599	0.518	0.827	0.717	0.838
Q08211	0.81	1.596	1.236	0.504	0.39	0.407	0.753	1.457	0.572	0.988	0.675	0.326	0.203	0.467	0.867	1.094	0.789	0.551	1.24	0.833	1.07	0.496	0.903	1.018	0.572	0.507	0.782	0.555	0.995	0.959	0.658	1.461	0.636	1.122	1.318	1.014	1.07	0.636	1.615	1.108	0.924	0.704	1.14	0.687	0.602	0.549	0.953	0.764	0.87
O60610	0.833	1.733	1.346	0.504	0.392	0.416	0.779	1.58	0.612	1.128	0.783	0.354	0.211	0.504	0.981	1.228	0.751	0.536	1.219	0.828	1.027	0.469	0.877	1.047	0.567	0.507	0.813	0.582	1.032	0.994	0.67	1.526	0.612	1.088	1.334	1.004	1.051	0.609	1.586	1.16	0.867	0.657	1.127	0.656	0.58	0.511	0.863	0.742	0.825
Q8NF50	0.832	1.646	1.267	0.486	0.378	0.382	0.744	1.473	0.621	1.09	0.766	0.342	0.213	0.499	0.957	1.199	0.773	0.537	1.177	0.808	1.008	0.48	0.871	1.014	0.559	0.504	0.775	0.569	0.991	0.938	0.642	1.476	0.651	1.112	1.351	1.041	1.111	0.649	1.651	1.177	0.89	0.676	1.087	0.657	0.579	0.518	0.883	0.765	0.826
P23141	0.883	1.672	1.323	0.503	0.363	0.427	0.739	1.49	0.614	1.086	0.783	0.344	0.199	0.481	0.907	1.177	0.821	0.543	1.262	0.888	1.066	0.498	0.859	1.026	0.535	0.467	0.79	0.555	0.952	0.926	0.604	1.441	0.616	1.069	1.39	0.996	1.006	0.56	1.527	1.171	0.912	0.622	1.14	0.584	0.556	0.483	0.779	0.687	0.873
P25705	0.851	1.654	1.318	0.478	0.35	0.404	0.727	1.47	0.595	1.047	0.722	0.331	0.201	0.473	0.865	1.099	0.798	0.534	1.221	0.846	0.991	0.502	0.859	0.998	0.541	0.481	0.782	0.541	0.925	0.905	0.589	1.396	0.611	1.062	1.31	0.998	1.034	0.59	1.519	1.104	0.876	0.654	1.064	0.619	0.531	0.462	0.773	0.687	0.827
Q99832	0.831	1.587	1.239	0.485	0.351	0.406	0.708	1.402	0.591	1.003	0.708	0.339	0.208	0.439	0.814	1.086	0.813	0.535	1.216	0.835	1.024	0.486	0.848	0.971	0.547	0.487	0.767	0.535	0.946	0.905	0.607	1.436	0.663	1.107	1.339	1.005	1.077	0.614	1.637	1.128	0.932	0.68	1.12	0.636	0.585	0.503	0.886	0.731	0.831
P22102	0.866	1.681	1.331	0.524	0.389	0.422	0.759	1.537	0.589	1.014	0.724	0.325	0.203	0.467	0.913	1.107	0.771	0.533	1.231	0.813	0.988	0.477	0.838	0.943	0.553	0.501	0.791	0.566	0.979	0.951	0.624	1.453	0.638	1.083	1.318	1.02	1.07	0.643	1.583	1.148	0.906	0.671	1.112	0.662	0.606	0.526	0.887	0.753	0.819
Q13885									0.65	1.166	0.799	0.386	0.218	0.457	0.874	1.429	0.717	0.505	1.099	0.892	0.817	0.508	0.792	0.856																	0.923	0.699	0.979	0.611	0.642	0.547	0.775	0.786	0.783
O75533	0.862	1.722	1.336	0.496	0.402	0.439	0.809	1.589	0.59	1.048	0.731	0.344	0.204	0.482	0.956	1.129	0.804	0.564	1.27	0.853	1.068	0.503	0.924	1.121	0.569	0.483	0.788	0.568	1.016	0.961	0.644	1.447	0.63	1.064	1.308	0.995	1.049	0.608	1.573	1.129	0.915	0.668	1.153	0.655	0.605	0.539	0.891	0.744	0.868
Q9P2J5	0.848	1.661	1.328	0.52	0.394	0.423	0.75	1.529	0.586	1.003	0.718	0.342	0.22	0.481	0.867	1.107	0.786	0.538	1.224	0.846	1.011	0.5	0.905	0.991	0.56	0.509	0.789	0.571	0.978	0.954	0.653	1.466	0.645	1.117	1.368	1.056	1.113	0.66	1.626	1.206	0.883	0.676	1.131	0.672	0.582	0.509	0.903	0.761	0.828
P11586	0.869	1.662	1.304	0.497	0.379	0.416	0.731	1.475	0.597	1.05	0.722	0.336	0.213	0.488	0.947	1.137	0.798	0.548	1.244	0.853	1.106	0.51	0.908	1.052	0.554	0.496	0.808	0.551	0.98	0.956	0.637	1.447	0.624	1.074	1.322	1.008	1.078	0.631	1.623	1.158	0.911	0.68	1.129	0.681	0.617	0.543	0.945	0.779	0.844
P17987	0.839	1.574	1.235	0.51	0.389	0.447	0.684	1.407	0.573	0.964	0.676	0.327	0.206	0.451	0.804	1.053	0.795	0.52	1.2	0.829	0.99	0.472	0.839	0.94	0.541	0.484	0.774	0.539	0.917	0.916	0.602	1.408	0.638	1.084	1.328	1.016	1.024	0.598	1.564	1.147	0.906	0.66	1.108	0.63	0.554	0.481	0.839	0.701	0.82
P49368	0.872	1.669	1.319	0.511	0.383	0.433	0.747	1.5	0.613	1.052	0.742	0.355	0.21	0.513	0.908	1.174	0.821	0.551	1.262	0.872	1.068	0.506	0.9	1.069	0.543	0.49	0.792	0.554	0.978	0.938	0.627	1.46	0.663	1.111	1.389	1.052	1.053	0.608	1.617	1.199	0.918	0.652	1.128	0.636	0.587	0.51	0.851	0.737	0.878
P13667	0.838	1.592	1.249	0.496	0.385	0.437	0.778	1.448	0.556	0.978	0.684	0.341	0.2	0.446	0.819	1.064	0.767	0.518	1.186	0.821	0.993	0.46	0.833	0.947	0.542	0.478	0.781	0.551	0.957	0.925	0.614	1.422	0.653	1.103	1.34	1.022	1.06	0.608	1.615	1.14	0.909	0.666	1.119	0.629	0.562	0.484	0.804	0.699	0.855
P06737	0.863	1.673	1.308	0.506	0.368	0.382	0.732	1.499	0.627	1.09	0.758	0.352	0.212	0.488	0.907	1.171	0.825	0.554	1.256	0.878	1.075	0.51	0.914	1.027	0.561	0.485	0.785	0.54	0.938	0.906	0.611	1.421	0.652	1.09	1.334	1.007	1.074	0.629	1.57	1.136	0.896	0.674	1.097	0.649	0.578	0.501	0.878	0.732	0.822
P08133	0.843	1.711	1.335	0.506	0.386	0.435	0.801	1.534	0.546	0.933	0.639	0.327	0.199	0.458	0.845	1.008	0.745	0.509	1.186	0.8	0.984	0.466	0.823	0.956	0.558	0.491	0.793	0.561	0.988	0.949	0.635	1.445	0.64	1.106	1.351	1.021	1.09	0.631	1.654	1.144	0.891	0.681	1.117	0.656	0.58	0.491	0.858	0.725	0.843
Q14974	0.861	1.629	1.292	0.506	0.37	0.431	0.743	1.481	0.597	1	0.718	0.336	0.207	0.473	0.898	1.105	0.786	0.521	1.196	0.846	1.056	0.489	0.849	1.035	0.557	0.5	0.8	0.546	0.957	0.919	0.618	1.441	0.634	1.068	1.39	1.03	1.032	0.607	1.564	1.17	0.904	0.666	1.116	0.629	0.578	0.501	0.814	0.752	0.873
A0A0A0MTS2	0.855	1.538	1.221	0.506	0.375	0.423	0.707	1.36	0.54	0.914	0.626	0.328	0.195	0.409	0.788	0.977	0.763	0.519	1.168	0.821	0.959	0.448	0.812	0.913	0.548	0.481	0.784	0.531	0.912	0.869	0.597	1.38	0.64	1.066	1.334	0.986	1.012	0.575	1.571	1.087	0.878	0.662	1.112	0.621	0.561	0.471	0.848	0.685	0.834
P55060	0.864	1.66	1.278	0.508	0.37	0.431	0.775	1.486	0.605	1.069	0.79	0.344	0.211	0.512	0.94	1.16	0.865	0.585	1.271	0.926	1.11	0.548	0.928	1.05	0.554	0.485	0.783	0.566	0.935	0.947	0.629	1.442	0.63	1.07	1.366	1.046	1.071	0.605	1.568	1.164	0.908	0.626	1.108	0.602	0.603	0.528	0.824	0.709	0.896
E9PKU7
A0A024R4E5	0.837	1.633	1.263	0.525	0.417	0.443	0.724	1.487	0.551	0.938	0.669	0.35	0.21	0.421	0.81	1.05	0.771	0.559	1.209	0.81	1.024	0.488	0.908	0.984	0.558	0.508	0.778	0.574	0.998	0.972	0.652	1.438	0.617	1.101	1.331	1.016	1.11	0.645	1.628	1.13	0.879	0.677	1.091	0.657	0.576	0.507	0.864	0.72	0.84
P04843	0.828	1.564	1.232	0.486	0.366	0.408	0.755	1.4	0.585	0.941	0.66	0.324	0.196	0.489	0.874	1.035	0.824	0.566	1.346	0.899	1.073	0.52	0.95	1.011	0.563	0.489	0.789	0.568	0.972	0.943	0.64	1.411	0.641	1.097	1.325	1.047	1.083	0.645	1.598	1.104	0.868	0.646	1.11	0.65	0.554	0.481	0.835	0.697	0.821
P07355	0.784	1.391	1.059	0.478	0.367	0.425	0.633	1.277	0.508	0.81	0.562	0.306	0.202	0.438	0.782	0.893	0.739	0.486	1.13	0.732	0.93	0.426	0.784	0.867	0.565	0.498	0.784	0.537	0.97	0.953	0.612	1.408	0.595	0.984	1.35	0.823	0.999	0.585	1.508	1.006	0.904	0.661	1.164	0.615	0.55	0.491	0.842	0.686	0.856
P27824	0.868	1.705	1.332	0.528	0.4	0.45	0.735	1.578	0.541	1	0.743	0.345	0.19	0.433	0.865	1.156	0.736	0.507	1.193	0.769	0.978	0.434	0.811	0.99	0.523	0.456	0.797	0.527	0.96	0.918	0.605	1.484	0.599	1.062	1.415	1.003	1.058	0.585	1.65	1.204	0.857	0.643	1.115	0.624	0.547	0.467	0.828	0.724	0.798
A0A0A0MRM8																									0.546	0.482	0.819	0.56	1.01	1.07	0.707	1.479									0.879	0.698	1.025	0.582	0.566	0.485	0.969	0.731	0.984
P68032	0.904	1.556	1.201	0.52	0.436	0.501	0.922	1.528	0.564	0.979	0.688	0.355	0.209	0.833	0.995	1.077	0.874	0.574	1.279	0.994	1.215	0.553	1.019	1.105	0.568	0.462	0.821	0.587	1.058	0.985	0.643	1.581	0.66	1.088	1.485	1.101	1.035	0.58	1.507	1.287	0.896	0.627	1.173	0.635	0.62	0.538	0.863	0.762	0.998
A0A0D9SGC1	0.863	1.625	1.258	0.527	0.408	0.43	0.732	1.47	0.593	0.983	0.7	0.358	0.221	0.455	0.825	1.112	0.772	0.533	1.204	0.823	1.018	0.494	0.872	0.965	0.565	0.522	0.801	0.579	1.034	0.98	0.675	1.494	0.645	1.129	1.307	1.055	1.099	0.634	1.586	1.15	0.89	0.666	1.071	0.647	0.562	0.507	0.884	0.722	0.812
P52209	0.831	1.592	1.23	0.483	0.354	0.415	0.713	1.42	0.63	1.097	0.76	0.344	0.211	0.497	0.909	1.166	0.79	0.514	1.177	0.839	0.995	0.475	0.861	0.961	0.531	0.479	0.77	0.534	0.91	0.891	0.59	1.379	0.646	1.069	1.296	0.985	1.005	0.577	1.528	1.115	0.903	0.662	1.097	0.61	0.538	0.469	0.777	0.693	0.835
Q8WUM4	0.85	1.668	1.264	0.496	0.387	0.425	0.737	1.473	0.548	0.968	0.705	0.337	0.206	0.466	0.829	1.085	0.789	0.542	1.193	0.843	1.042	0.502	0.885	1.003	0.542	0.484	0.76	0.551	0.966	0.941	0.628	1.449	0.627	1.05	1.329	0.989	1.065	0.59	1.601	1.145	0.906	0.637	1.122	0.619	0.605	0.538	0.875	0.72	0.857
P19338	0.832	1.55	1.186	0.477	0.349	0.404	0.702	1.356	0.548	0.907	0.626	0.318	0.199	0.412	0.741	0.974	0.781	0.515	1.146	0.76	0.954	0.431	0.778	0.916	0.536	0.455	0.736	0.517	0.885	0.881	0.562	1.374	0.638	1.072	1.258	0.948	1.017	0.565	1.63	1.054	0.927	0.666	1.115	0.588	0.52	0.455	0.793	0.643	0.814
O95466	0.865	1.716	1.358	0.508	0.395	0.439	0.77	1.535	0.592	1.055	0.74	0.35	0.21	0.504	0.927	1.146	0.784	0.532	1.222	0.839	1.055	0.47	0.886	1.012	0.548	0.494	0.795	0.576	0.985	0.96	0.642	1.468	0.626	1.103	1.348	1.063	1.099	0.617	1.617	1.182	0.907	0.653	1.119	0.633	0.578	0.507	0.859	0.723	0.855
Q16555	0.85	1.652	1.293	0.509	0.386	0.415	0.729	1.497	0.566	0.989	0.674	0.352	0.203	0.444	0.833	1.055	0.769	0.532	1.197	0.826	1.023	0.463	0.87	0.941	0.56	0.5	0.799	0.555	0.988	0.934	0.64	1.495	0.617	1.069	1.351	0.984	1.047	0.594	1.572	1.121	0.884	0.667	1.114	0.642	0.563	0.486	0.86	0.722	0.852
K7EKE6	0.855	1.686	1.303	0.508	0.395	0.435	0.755	1.504	0.55	0.95	0.67	0.331	0.209	0.453	0.826	1.059	0.743	0.508	1.154	0.769	0.97	0.452	0.813	0.968	0.556	0.493	0.783	0.55	0.955	0.924	0.63	1.424	0.647	1.107	1.338	1.019	1.067	0.613	1.622	1.156	0.908	0.674	1.137	0.657	0.591	0.52	0.853	0.747	0.845
P08758	0.858	1.629	1.286	0.478	0.349	0.413	0.762	1.409	0.623	1.056	0.751	0.32	0.2	0.538	0.965	1.126	0.849	0.546	1.223	0.903	1.059	0.539	0.884	0.996	0.528	0.46	0.779	0.537	0.897	0.915	0.582	1.324	0.617	1.1	1.347	1.035	1.002	0.598	1.509	1.133	0.924	0.63	1.083	0.582	0.517	0.47	0.719	0.654	0.845
P13489	0.856	1.586	1.234	0.508	0.414	0.439	0.768	1.449	0.561	0.932	0.681	0.338	0.21	0.491	0.83	1.028	0.741	0.497	1.099	0.766	0.944	0.436	0.774	0.885	0.547	0.468	0.761	0.528	0.948	0.922	0.612	1.419	0.632	1.096	1.313	0.991	1.075	0.615	1.67	1.113	0.909	0.683	1.128	0.638	0.59	0.512	0.868	0.744	0.821
O60506	0.814	1.668	1.259	0.489	0.371	0.406	0.703	1.447	0.569	1.012	0.683	0.327	0.206	0.454	0.84	1.064	0.785	0.541	1.24	0.818	1.044	0.502	0.875	0.986	0.548	0.481	0.781	0.531	0.934	0.921	0.602	1.4	0.624	1.069	1.289	1.023	1.06	0.601	1.57	1.058	0.924	0.651	1.088	0.634	0.54	0.489	0.791	0.657	0.846
P18669	0.851	1.675	1.299	0.523	0.391	0.436	0.761	1.445	0.535	0.923	0.634	0.34	0.191	0.48	0.822	0.973	0.761	0.529	1.195	0.82	0.982	0.44	0.84	0.941	0.534	0.477	0.774	0.55	0.939	0.901	0.589	1.397	0.647	1.071	1.368	1.031	1.014	0.577	1.614	1.139	0.883	0.635	1.103	0.581	0.552	0.468	0.801	0.664	0.864
A2A274	0.855	1.574	1.226	0.528	0.424	0.467	0.791	1.446	0.557	0.939	0.677	0.335	0.204	0.444	0.833	1.062	0.784	0.552	1.217	0.848	1.075	0.486	0.899	1.043	0.563	0.5	0.801	0.586	1.054	0.998	0.69	1.541	0.647	1.167	1.404	1.088	1.182	0.659	1.79	1.197	0.904	0.682	1.157	0.707	0.643	0.564	1.063	0.797	0.855
Q00839	0.784	1.55	1.142	0.483	0.368	0.436	0.677	1.331	0.52	0.885	0.58	0.286	0.184	0.387	0.726	0.915	0.698	0.5	1.091	0.692	0.927	0.405	0.735	0.878	0.55	0.495	0.776	0.514	0.958	0.905	0.604	1.411	0.623	1.088	1.291	0.988	1.067	0.578	1.628	1.092	0.885	0.664	1.065	0.628	0.537	0.459	0.802	0.681	0.829
Q63HN8	0.857	1.614	1.25	0.536	0.419	0.431	0.717	1.49	0.598	1.034	0.733	0.349	0.226	0.473	0.914	1.182	0.891	0.644	1.369	0.965	1.255	0.614	1.098	1.157	0.548	0.545	0.81	0.605	1.04	0.989	0.707	1.53	0.646	1.149	1.358	1.098	1.181	0.743	1.767	1.238	0.919	0.674	1.134	0.705	0.661	0.557	0.966	0.822	0.822
A0A1W2PPS1	0.843	1.495	1.143	0.575	0.42	0.584	0.816	1.439	0.412	0.587	0.413	0.254	0.163	0.39	0.622	0.67	0.569	0.536	1.141	0.674	1.011	0.416	0.807	0.964	0.6	0.573	0.848	0.597	1.229	1.137	0.714	1.591	0.614	1.252	1.603	1.033	1.214	0.677	2.032	1.151	1.12	0.876	1.703	0.738	0.755	1.059	1.396	0.798	0.901
P16615	0.827	1.573	1.212	0.492	0.369	0.423	0.721	1.392	0.547	0.958	0.662	0.338	0.201	0.428	0.807	1.01	0.795	0.542	1.222	0.816	1.058	0.475	0.882	1.077	0.563	0.508	0.786	0.558	0.982	0.926	0.629	1.449	0.633	1.088	1.325	0.994	1.077	0.618	1.66	1.135	0.889	0.679	1.106	0.63	0.595	0.507	0.859	0.761	0.83
P35606	0.849	1.648	1.288	0.508	0.386	0.433	0.798	1.496	0.599	1.012	0.714	0.335	0.205	0.534	0.946	1.13	0.788	0.555	1.306	0.849	1.095	0.498	0.956	1.1	0.565	0.508	0.801	0.562	1.032	0.997	0.67	1.498	0.647	1.117	1.366	1.035	1.125	0.647	1.676	1.194	0.889	0.677	1.152	0.685	0.616	0.546	0.945	0.781	0.855
P30153	0.876	1.598	1.223	0.505	0.401	0.443	0.786	1.459	0.564	0.991	0.742	0.345	0.211	0.525	0.914	1.103	0.84	0.548	1.241	0.875	1.068	0.505	0.903	1.044	0.553	0.465	0.791	0.564	0.978	0.972	0.623	1.463	0.638	1.089	1.388	1.047	1.049	0.584	1.651	1.171	0.934	0.623	1.135	0.595	0.599	0.523	0.829	0.694	0.908
P11215	0.852	1.572	1.226	0.54	0.427	0.462	0.786	1.473	0.617	1.03	0.761	0.353	0.24	0.492	0.933	1.165	0.857	0.596	1.292	0.909	1.134	0.583	0.989	1.13	0.569	0.501	0.811	0.57	1.047	1.043	0.725	1.475	0.684	1.161	1.383	1.113	1.174	0.673	1.691	1.177	0.926	0.7	1.126	0.672	0.645	0.543	0.928	0.776	0.834
P07195	0.851	1.703	1.339	0.486	0.345	0.4	0.681	1.47	0.548	0.966	0.656	0.306	0.184	0.433	0.841	0.997	0.824	0.514	1.254	0.863	1.024	0.467	0.815	0.944	0.524	0.457	0.774	0.519	0.898	0.867	0.558	1.35	0.628	1.058	1.335	0.978	0.987	0.552	1.489	1.105	0.906	0.602	1.08	0.55	0.491	0.429	0.729	0.631	0.851
P23381	0.809	1.568	1.233	0.485	0.365	0.439	0.745	1.404	0.541	0.94	0.658	0.328	0.188	0.444	0.805	1.003	0.801	0.532	1.224	0.846	1.022	0.486	0.849	0.954	0.541	0.486	0.778	0.549	0.939	0.916	0.61	1.378	0.656	1.088	1.346	1.012	1.055	0.6	1.606	1.162	0.915	0.653	1.143	0.622	0.539	0.496	0.814	0.71	0.844
P54136	0.881	1.749	1.371	0.516	0.374	0.404	0.75	1.556	0.637	1.11	0.783	0.342	0.209	0.503	0.951	1.19	0.811	0.566	1.298	0.882	1.074	0.522	0.909	1.077	0.558	0.5	0.778	0.554	0.969	0.937	0.639	1.482	0.629	1.091	1.321	1.037	1.076	0.641	1.536	1.188	0.929	0.667	1.12	0.647	0.581	0.516	0.858	0.729	0.83
P60174	0.881	1.523	1.152	0.5	0.388	0.448	0.706	1.289	0.534	0.859	0.646	0.325	0.194	0.439	0.741	0.923	0.818	0.522	1.157	0.828	0.994	0.464	0.81	0.911	0.529	0.447	0.748	0.532	0.888	0.864	0.57	1.369	0.581	1.033	1.316	0.957	0.979	0.522	1.483	1.119	0.916	0.602	1.103	0.539	0.537	0.467	0.718	0.616	0.896
Q99460	0.861	1.637	1.272	0.508	0.4	0.438	0.752	1.517	0.571	0.999	0.697	0.352	0.217	0.459	0.879	1.094	0.794	0.556	1.246	0.867	1.066	0.51	0.905	1.048	0.55	0.502	0.791	0.564	0.974	0.947	0.632	1.451	0.618	1.092	1.284	0.998	1.071	0.608	1.606	1.105	0.901	0.64	1.093	0.637	0.582	0.517	0.854	0.718	0.851
Q13263	0.858	1.681	1.305	0.507	0.388	0.435	0.762	1.544	0.576	1.004	0.71	0.34	0.196	0.476	0.872	1.113	0.768	0.537	1.239	0.826	1.04	0.465	0.871	0.992	0.558	0.505	0.829	0.58	1.029	0.985	0.663	1.512	0.619	1.101	1.394	1.016	1.104	0.598	1.713	1.166	0.894	0.651	1.156	0.643	0.583	0.497	0.88	0.718	0.829
Q5VZU9	0.865	1.79	1.4	0.527	0.408	0.4	0.793	1.6	0.617	1.087	0.768	0.36	0.236	0.472	0.929	1.197	0.85	0.6	1.342	0.906	1.156	0.544	1.003	1.138	0.573	0.504	0.806	0.587	1.02	0.982	0.68	1.516	0.657	1.124	1.391	1.098	1.137	0.656	1.62	1.218	0.888	0.694	1.154	0.689	0.621	0.54	0.922	0.789	0.837
Q5T0R9	1.034	2.017	1.708	0.568	0.363	0.349	0.839	1.762	0.816	1.442	1.051	0.365	0.199	0.644	1.271	1.588	0.946	0.611	1.439	1.121	1.138	0.656	1.021	1.021	0.504	0.566	0.862	0.638	0.95	0.986	0.677	1.534	0.618	1.07	1.494	1.152	1.022	0.547	1.41	1.243	0.937	0.562	1.191	0.55	0.591	0.574	0.755	0.718	0.987
A8MXP9	0.777	1.478	1.092	0.473	0.364	0.435	0.712	1.326	0.492	0.797	0.535	0.301	0.185	0.411	0.681	0.883	0.783	0.552	1.203	0.816	1.001	0.488	0.869	0.939	0.571	0.474	0.778	0.544	0.969	0.938	0.624	1.42	0.597	1.089	1.296	1.002	1.068	0.604	1.613	1.063	0.88	0.657	1.048	0.618	0.561	0.494	0.818	0.654	0.852
Q3BDU5									0.351	0.591	0.434	0.296	0.187	0.362	0.476	0.659	0.662	0.477	0.968	0.654	0.759	0.419	0.664	0.698	0.534	0.537	0.873	0.628	1.016	1.173	0.735	1.427
P02786	0.829	1.524	1.191	0.497	0.39	0.441	0.709	1.391	0.555	0.917	0.64	0.338	0.218	0.411	0.811	1.007	0.74	0.501	1.111	0.765	0.942	0.456	0.825	0.93	0.541	0.506	0.762	0.54	0.952	0.924	0.627	1.444	0.652	1.087	1.31	0.995	1.031	0.59	1.565	1.11	0.891	0.685	1.111	0.643	0.561	0.471	0.812	0.702	0.811
P31948	0.83	1.491	1.102	0.486	0.369	0.423	0.725	1.321	0.515	0.88	0.647	0.338	0.199	0.445	0.781	0.946	0.797	0.548	1.212	0.879	1.062	0.482	0.896	1	0.528	0.459	0.756	0.567	0.988	0.951	0.616	1.374	0.659	1.035	1.328	0.993	1.009	0.505	1.574	1.093	0.93	0.609	1.11	0.545	0.563	0.484	0.75	0.625	0.893
Q5T4S7	0.879	1.71	1.321	0.518	0.383	0.357	0.764	1.56	0.825	1.479	1.046	0.419	0.28	0.601	1.276	1.679	0.899	0.637	1.343	0.943	1.185	0.606	1.048	1.159	0.552	0.498	0.773	0.571	0.994	0.993	0.669	1.436	0.689	1.143	1.324	1.084	1.188	0.727	1.6	1.218	0.915	0.689	1.139	0.704	0.645	0.595	0.963	0.841	0.881
Q02880	0.842	1.725	1.255	0.504	0.382	0.403	0.711	1.472	0.663	1.099	0.737	0.325	0.218	0.5	0.936	1.254	0.81	0.541	1.189	0.822	1.086	0.516	0.858	1.067	0.542	0.473	0.745	0.53	0.875	0.882	0.617	1.347	0.606	1.074	1.26	0.99	1.056	0.599	1.453	1.055	0.904	0.706	1.138	0.664	0.619	0.534	0.834	0.745	0.851
P48147	0.879	1.748	1.391	0.532	0.413	0.436	0.811	1.599	0.603	1.041	0.739	0.357	0.224	0.523	0.96	1.156	0.785	0.565	1.301	0.863	1.059	0.523	0.941	1.023	0.58	0.508	0.805	0.583	0.999	1.003	0.66	1.487	0.622	1.129	1.364	1.075	1.152	0.701	1.663	1.228	0.898	0.675	1.132	0.679	0.605	0.532	0.865	0.762	0.867
V9GYM8	0.82	1.523	1.208	0.506	0.408	0.425	0.738	1.422	0.512	0.836	0.626	0.327	0.2	0.454	0.766	0.95	0.822	0.556	1.266	0.877	1.079	0.537	0.927	1.061	0.558	0.502	0.832	0.578	1.033	1.005	0.679	1.494	0.647	1.15	1.413	1.078	1.167	0.634	1.711	1.216	0.896	0.665	1.125	0.658	0.617	0.536	0.897	0.744	0.865
Q92608	0.861	1.677	1.364	0.512	0.402	0.42	0.788	1.591	0.65	1.158	0.827	0.348	0.231	0.534	1.06	1.294	0.766	0.546	1.258	0.835	1.078	0.497	0.922	1.107	0.539	0.505	0.783	0.565	1.021	0.962	0.668	1.499	0.665	1.138	1.369	1.066	1.132	0.675	1.649	1.221	0.87	0.647	1.09	0.641	0.582	0.514	0.881	0.769	0.835
E9PHY5	0.822	1.566	1.232	0.503	0.404	0.449	0.748	1.436	0.521	0.886	0.631	0.343	0.2	0.421	0.744	0.988	0.723	0.515	1.17	0.788	0.951	0.448	0.81	0.93	0.541	0.488	0.773	0.564	0.963	0.938	0.636	1.428	0.647	1.12	1.357	1.015	1.094	0.64	1.67	1.132	0.896	0.668	1.079	0.607	0.538	0.463	0.785	0.682	0.847
P61978	0.825	1.618	1.26	0.512	0.382	0.441	0.737	1.427	0.513	0.829	0.579	0.307	0.185	0.439	0.747	0.896	0.739	0.515	1.166	0.785	0.933	0.449	0.825	0.922	0.58	0.517	0.797	0.564	0.982	0.96	0.647	1.419	0.643	1.129	1.365	1.066	1.101	0.636	1.635	1.093	0.903	0.689	1.115	0.659	0.55	0.468	0.823	0.69	0.833
Q12965	0.791	1.568	1.237	0.5	0.369	0.4	0.705	1.422	0.576	0.999	0.699	0.327	0.211	0.439	0.859	1.113	0.729	0.493	1.126	0.763	0.914	0.442	0.764	0.885	0.534	0.502	0.785	0.535	0.903	0.884	0.591	1.43	0.622	1.09	1.287	0.957	1.057	0.609	1.488	1.113	0.866	0.669	1.059	0.603	0.548	0.481	0.794	0.689	0.795
A0A0G2JIW1	0.832	1.583	1.227	0.491	0.374	0.429	0.703	1.387	0.568	0.973	0.674	0.331	0.198	0.428	0.803	1.059	0.789	0.531	1.201	0.831	1.025	0.47	0.84	0.958	0.528	0.483	0.764	0.54	0.933	0.906	0.599	1.44	0.615	1.085	1.294	0.983	1.042	0.6	1.587	1.107	0.883	0.655	1.114	0.631	0.607	0.505	0.87	0.742	0.834
P04844	0.877	1.673	1.324	0.531	0.394	0.42	0.784	1.452	0.608	1.062	0.728	0.363	0.222	0.479	0.919	1.128	0.778	0.541	1.18	0.818	0.994	0.488	0.87	0.973	0.581	0.534	0.797	0.59	1.013	0.964	0.675	1.47	0.639	1.1	1.336	1.049	1.088	0.659	1.577	1.159	0.869	0.665	1.083	0.652	0.558	0.488	0.826	0.734	0.834
Q01813	0.857	1.671	1.316	0.505	0.366	0.398	0.746	1.467	0.622	1.072	0.753	0.337	0.208	0.483	0.922	1.176	0.797	0.528	1.258	0.858	1.062	0.495	0.895	0.996	0.548	0.515	0.816	0.573	1.033	0.957	0.65	1.51	0.633	1.12	1.391	1.035	1.085	0.623	1.582	1.123	0.886	0.655	1.111	0.641	0.551	0.482	0.829	0.722	0.802
O60763	0.822	1.553	1.202	0.495	0.384	0.438	0.73	1.414	0.495	0.819	0.57	0.311	0.179	0.386	0.716	0.879	0.718	0.528	1.16	0.767	0.94	0.434	0.814	0.914	0.561	0.506	0.783	0.576	1.004	0.978	0.641	1.432	0.637	1.113	1.346	1.04	1.061	0.593	1.631	1.136	0.882	0.669	1.081	0.607	0.543	0.466	0.806	0.714	0.825
Q92835	0.866	1.7	1.333	0.541	0.385	0.419	0.764	1.49	0.615	1.016	0.724	0.356	0.212	0.49	0.917	1.134	0.769	0.564	1.217	0.84	1.05	0.484	0.905	1.016	0.559	0.503	0.803	0.584	1.033	0.99	0.681	1.497	0.636	1.082	1.324	1.006	1.095	0.622	1.612	1.14	0.89	0.704	1.137	0.655	0.619	0.551	0.92	0.76	0.848
Q68CZ2	0.83	1.558	1.172	0.516	0.39	0.429	0.688	1.431	0.621	1.024	0.724	0.349	0.223	0.474	0.91	1.138	0.824	0.58	1.282	0.878	1.082	0.555	0.984	1.061	0.568	0.527	0.782	0.589	1.056	1.005	0.68	1.505	0.645	1.131	1.313	1.024	1.122	0.634	1.633	1.121	0.887	0.691	1.105	0.656	0.595	0.529	0.882	0.727	0.843
P61158	0.858	1.724	1.341	0.501	0.388	0.433	0.779	1.545	0.546	0.947	0.659	0.332	0.186	0.455	0.855	1.019	0.734	0.496	1.128	0.756	0.926	0.431	0.785	0.891	0.554	0.496	0.781	0.558	0.973	0.933	0.622	1.42	0.64	1.07	1.318	0.999	1.031	0.606	1.564	1.114	0.893	0.672	1.096	0.635	0.545	0.472	0.809	0.716	0.874
P04040	0.875	1.61	1.253	0.519	0.394	0.424	0.763	1.419	0.587	0.957	0.712	0.352	0.209	0.454	0.821	1.046	0.763	0.539	1.156	0.789	0.999	0.462	0.864	0.979	0.56	0.498	0.769	0.561	0.988	0.937	0.634	1.439	0.647	1.107	1.326	1.016	1.1	0.609	1.66	1.148	0.924	0.67	1.124	0.64	0.582	0.5	0.861	0.722	0.847
P41250	0.819	1.534	1.218	0.504	0.384	0.424	0.682	1.356	0.559	0.952	0.658	0.329	0.202	0.454	0.791	1.04	0.799	0.552	1.245	0.832	1.021	0.497	0.879	0.958	0.555	0.491	0.777	0.556	0.962	0.921	0.621	1.372	0.616	1.105	1.304	1.002	1.067	0.631	1.632	1.139	0.901	0.657	1.101	0.618	0.555	0.472	0.81	0.697	0.803
P54577	0.84	1.619	1.248	0.495	0.38	0.407	0.733	1.419	0.632	1.086	0.774	0.35	0.216	0.519	0.927	1.172	0.809	0.536	1.203	0.851	1.018	0.501	0.879	0.966	0.547	0.485	0.769	0.556	0.976	0.932	0.619	1.425	0.637	1.1	1.317	1.017	1.042	0.606	1.604	1.133	0.902	0.66	1.12	0.632	0.552	0.491	0.804	0.726	0.859
A0A0A6YYL4	0.871	1.647	1.263	0.55	0.45	0.48	0.752	1.539	0.495	0.786	0.564	0.326	0.214	0.401	0.689	0.894	0.758	0.563	1.219	0.817	1.048	0.503	0.932	0.919	0.568	0.51	0.799	0.601	1.078	1.041	0.708	1.502	0.651	1.151	1.386	1.096	1.235	0.685	1.807	1.202	0.932	0.696	1.146	0.677	0.602	0.529	0.926	0.74	0.844
A0A2R8YEA7	0.733	1.061	0.843	0.4	0.274	0.387	0.642	1.029	1.354	1.919	1.181	0.632	0.471	1.401	2.848	1.83	0.867	0.641	1.196	1.106	1.291	0.53	0.948	0.866	0.712	0.657	0.876	0.628	1.03	0.946	0.695	1.361	0.684	1.065	1.395	0.955	0.906	0.657	1.366	0.903	0.895	0.819	1.194	0.762	0.523	0.462	0.808	0.838	0.952
P00338	0.831	1.603	1.279	0.481	0.35	0.401	0.727	1.371	0.585	1.001	0.664	0.317	0.194	0.433	0.867	1.018	0.712	0.487	1.131	0.751	0.894	0.407	0.77	0.853	0.537	0.473	0.762	0.5	0.88	0.829	0.565	1.338	0.606	1.062	1.339	0.983	1.008	0.576	1.493	1.066	0.839	0.64	1.087	0.6	0.521	0.432	0.754	0.662	0.826
Q13045	0.861	1.685	1.297	0.517	0.405	0.425	0.748	1.495	0.612	1.023	0.729	0.342	0.207	0.455	0.895	1.136	0.869	0.606	1.3	0.934	1.152	0.588	1.008	1.116	0.561	0.508	0.798	0.575	1.014	0.969	0.666	1.504	0.634	1.094	1.313	1.026	1.096	0.644	1.605	1.113	0.893	0.695	1.084	0.673	0.608	0.534	0.897	0.757	0.834
Q15029	0.824	1.651	1.288	0.504	0.385	0.438	0.753	1.528	0.545	0.87	0.625	0.34	0.207	0.425	0.747	1.026	0.826	0.569	1.257	0.862	1.089	0.525	0.875	1.023	0.565	0.51	0.804	0.556	0.975	0.946	0.636	1.458	0.635	1.06	1.362	1.002	1.068	0.64	1.582	1.14	0.919	0.684	1.128	0.658	0.599	0.551	0.872	0.771	0.826
P17812	0.833	1.524	1.224	0.518	0.391	0.43	0.708	1.4	0.586	1.012	0.716	0.336	0.211	0.468	0.885	1.132	0.76	0.528	1.19	0.782	0.979	0.46	0.82	0.915	0.547	0.493	0.779	0.547	0.975	0.934	0.633	1.471	0.629	1.067	1.29	0.987	1.047	0.604	1.626	1.088	0.887	0.653	1.124	0.646	0.569	0.499	0.881	0.71	0.823
Q9BUF5	0.893	1.702	1.361	0.515	0.375	0.44	0.809	1.545	0.601	1.066	0.735	0.327	0.183	0.524	1.02	1.145	0.856	0.578	1.433	0.967	1.211	0.564	1.003	1.273	0.568	0.512	0.835	0.571	1.051	1	0.644	1.525	0.623	1.131	1.428	1.078	1.066	0.644	1.632	1.232	0.864	0.647	1.111	0.648	0.564	0.487	0.887	0.758	0.871
Q15393	0.889	1.66	1.313	0.543	0.421	0.437	0.787	1.538	0.631	1.07	0.754	0.351	0.228	0.488	0.902	1.166	0.815	0.553	1.203	0.854	1.046	0.501	0.88	0.983	0.575	0.506	0.782	0.555	0.953	0.941	0.637	1.446	0.654	1.111	1.317	1.015	1.096	0.651	1.59	1.136	0.935	0.703	1.099	0.666	0.594	0.528	0.89	0.759	0.855
A0A2U3TZM0	0.856	1.668	1.294	0.515	0.421	0.464	0.79	1.598	0.549	0.945	0.647	0.34	0.21	0.466	0.86	1.071	0.773	0.522	1.259	0.839	1.042	0.486	0.875	1.05	0.559	0.504	0.815	0.565	1.039	0.997	0.685	1.554	0.624	1.115	1.403	1.037	1.151	0.677	1.698	1.193	0.895	0.684	1.145	0.685	0.634	0.535	0.926	0.813	0.863
O15144	0.845	1.601	1.254	0.492	0.373	0.412	0.722	1.405	0.586	0.979	0.666	0.329	0.202	0.457	0.846	1.03	0.748	0.501	1.145	0.781	0.952	0.462	0.841	0.915	0.557	0.493	0.764	0.535	0.936	0.908	0.609	1.368	0.635	1.075	1.282	0.993	1.054	0.621	1.552	1.097	0.887	0.681	1.104	0.645	0.555	0.468	0.827	0.712	0.837
P60842	0.887	1.68	1.34	0.517	0.393	0.433	0.739	1.55	0.583	1.028	0.723	0.319	0.202	0.5	0.923	1.141	0.789	0.531	1.306	0.854	1.078	0.503	0.864	1.023	0.552	0.493	0.806	0.559	1.015	0.961	0.633	1.451	0.614	1.095	1.375	1.011	1.064	0.617	1.636	1.152	0.91	0.676	1.134	0.655	0.573	0.499	0.871	0.726	0.832
P17858	0.857	1.655	1.326	0.52	0.397	0.422	0.797	1.522	0.622	1.041	0.733	0.345	0.207	0.56	0.989	1.142	0.775	0.556	1.269	0.834	1.048	0.471	0.913	1.058	0.565	0.512	0.803	0.557	1.015	0.98	0.667	1.488	0.65	1.127	1.375	1.071	1.131	0.643	1.67	1.194	0.861	0.674	1.131	0.651	0.586	0.516	0.89	0.737	0.799
P05455	0.806	1.574	1.222	0.459	0.356	0.419	0.786	1.393	0.516	0.916	0.644	0.309	0.183	0.43	0.859	0.987	0.738	0.517	1.211	0.796	0.987	0.443	0.801	0.981	0.526	0.458	0.777	0.55	0.936	0.896	0.595	1.402	0.621	1.087	1.335	0.985	1.025	0.544	1.628	1.131	0.887	0.615	1.087	0.58	0.519	0.459	0.743	0.655	0.887
Q9UH99	0.897	1.708	1.35	0.546	0.415	0.458	0.788	1.598	0.591	0.994	0.711	0.352	0.213	0.492	0.911	1.121	0.787	0.56	1.254	0.883	1.077	0.52	0.949	1.08	0.571	0.501	0.821	0.585	1.038	1.028	0.672	1.599	0.665	1.134	1.398	1.075	1.158	0.641	1.721	1.283	0.876	0.674	1.109	0.642	0.611	0.511	0.88	0.761	0.868
Q16658	0.863	1.549	1.219	0.531	0.414	0.458	0.776	1.417	0.545	0.888	0.629	0.334	0.206	0.449	0.805	0.982	0.775	0.551	1.216	0.812	1.019	0.488	0.886	0.968	0.564	0.491	0.761	0.545	0.951	0.942	0.629	1.399	0.636	1.118	1.321	1.016	1.091	0.617	1.641	1.1	0.915	0.703	1.138	0.693	0.622	0.521	0.894	0.746	0.827
P40926	0.853	1.649	1.295	0.49	0.355	0.411	0.677	1.417	0.587	0.993	0.7	0.329	0.202	0.432	0.794	1.056	0.781	0.517	1.17	0.824	0.962	0.464	0.799	0.888	0.527	0.474	0.765	0.526	0.911	0.87	0.573	1.367	0.651	1.08	1.332	0.997	1.006	0.602	1.549	1.115	0.908	0.659	1.092	0.606	0.537	0.463	0.768	0.671	0.826
P41252	0.89	1.778	1.393	0.538	0.402	0.443	0.808	1.66	0.632	1.09	0.757	0.339	0.222	0.518	0.998	1.171	0.819	0.559	1.282	0.876	1.114	0.541	0.94	1.079	0.554	0.512	0.787	0.569	1.008	0.962	0.662	1.493	0.616	1.092	1.346	1.038	1.11	0.661	1.591	1.2	0.884	0.659	1.11	0.653	0.593	0.522	0.88	0.78	0.855
P49411	0.855	1.625	1.294	0.511	0.398	0.432	0.739	1.492	0.585	1.005	0.707	0.334	0.214	0.473	0.9	1.099	0.794	0.533	1.24	0.849	1.029	0.49	0.883	0.971	0.545	0.492	0.788	0.547	0.979	0.934	0.633	1.448	0.643	1.108	1.327	0.999	1.075	0.634	1.69	1.143	0.905	0.676	1.123	0.644	0.565	0.487	0.866	0.714	0.846
Q10567	0.894	1.836	1.425	0.568	0.414	0.426	0.862	1.675	0.601	1.089	0.735	0.349	0.224	0.498	0.974	1.194	0.786	0.533	1.248	0.876	1.057	0.521	0.856	1.05	0.586	0.528	0.806	0.603	1.098	1.075	0.698	1.558	0.683	1.148	1.374	1.095	1.152	0.681	1.708	1.25	0.913	0.678	1.105	0.663	0.583	0.533	0.851	0.747	0.882
P26639	0.862	1.703	1.345	0.508	0.392	0.42	0.79	1.552	0.614	1.075	0.746	0.346	0.214	0.515	0.964	1.177	0.812	0.559	1.262	0.862	1.068	0.51	0.919	1.061	0.565	0.506	0.819	0.566	1.004	0.94	0.639	1.51	0.638	1.09	1.37	1.034	1.059	0.634	1.573	1.19	0.907	0.661	1.11	0.647	0.583	0.507	0.866	0.743	0.822
P51854	0.861	1.685	1.352	0.52	0.372	0.415	0.752	1.518	0.588	1.007	0.715	0.342	0.21	0.488	0.904	1.085	0.751	0.555	1.211	0.804	0.985	0.486	0.902	0.942	0.571	0.517	0.806	0.572	0.978	0.947	0.655	1.491	0.649	1.125	1.35	1.037	1.112	0.678	1.721	1.121	0.875	0.675	1.127	0.662	0.574	0.491	0.863	0.726	0.789
P63104	0.866	1.582	1.241	0.491	0.367	0.418	0.749	1.399	0.641	1.113	0.796	0.354	0.21	0.501	0.914	1.173	0.809	0.53	1.15	0.853	0.994	0.473	0.818	0.975	0.557	0.468	0.778	0.565	0.919	0.916	0.604	1.391	0.653	1.077	1.325	1.009	0.995	0.565	1.48	1.113	0.925	0.666	1.094	0.608	0.559	0.479	0.767	0.676	0.848
Q8TDZ2	0.836	1.646	1.292	0.509	0.391	0.412	0.724	1.463	0.559	0.934	0.653	0.329	0.204	0.459	0.825	1.054	0.731	0.54	1.167	0.805	0.999	0.467	0.834	0.981	0.554	0.505	0.795	0.578	1.012	0.984	0.673	1.467	0.615	1.102	1.372	1.046	1.119	0.652	1.665	1.152	0.869	0.662	1.092	0.658	0.592	0.515	0.869	0.722	0.837
Q0VD83	0.846	1.501	1.171	0.542	0.439	0.504	0.799	1.474	0.456	0.692	0.516	0.327	0.189	0.403	0.61	0.818	0.652	0.524	1.136	0.754	0.936	0.398	0.785	0.858	0.57	0.491	0.841	0.592	1.09	1.036	0.706	1.556	0.662	1.25	1.509	1.091	1.261	0.617	2.015	1.295	0.906	0.698	1.165	0.647	0.607	0.513	0.884	0.747	0.908
P13645	0.299	0.434	0.321	0.142	0.142	0.145	0.23	0.819	0.504	0.693	0.613	0.427	0.407	0.731	0.51	0.788	0.818	0.457	1.101	1.007	3.795	0.699	0.958	1.358	0.987	0.996	2.931	0.577	2.473	1.094	1.049	1.693	0.559	0.79	0.867	1.098	0.928	0.392	1.994	1.175	1.034	1.003	1.136	0.943	0.764	2.359	5.476	1.061	1.023
P21980	0.844	1.54	1.197	0.523	0.41	0.45	0.759	1.413	0.558	0.939	0.674	0.338	0.207	0.456	0.84	1.034	0.759	0.523	1.211	0.832	0.995	0.473	0.894	0.971	0.562	0.505	0.817	0.594	1.002	1	0.691	1.477	0.637	1.135	1.364	1.048	1.092	0.635	1.628	1.139	0.894	0.698	1.109	0.655	0.567	0.481	0.858	0.735	0.834
Q9Y3Z3	0.829	1.641	1.267	0.495	0.381	0.422	0.73	1.451	0.555	1.002	0.707	0.352	0.199	0.467	0.846	1.111	0.74	0.518	1.207	0.812	0.96	0.448	0.824	1.001	0.555	0.502	0.799	0.569	1.014	0.966	0.646	1.495	0.628	1.11	1.372	1.039	1.084	0.629	1.647	1.172	0.848	0.638	1.079	0.617	0.562	0.493	0.838	0.728	0.842
P40227	0.84	1.599	1.236	0.504	0.376	0.435	0.674	1.367	0.572	0.969	0.668	0.322	0.203	0.429	0.798	1.042	0.774	0.509	1.124	0.776	0.935	0.461	0.788	0.882	0.53	0.478	0.741	0.533	0.878	0.85	0.583	1.345	0.652	1.072	1.296	0.985	1.006	0.608	1.539	1.085	0.906	0.668	1.076	0.615	0.543	0.464	0.801	0.677	0.827
O60841	0.829	1.596	1.206	0.5	0.399	0.43	0.763	1.444	0.52	0.904	0.64	0.345	0.19	0.399	0.763	1	0.785	0.569	1.233	0.861	1.038	0.488	0.889	1.034	0.574	0.522	0.803	0.599	1.022	1.003	0.661	1.48	0.687	1.145	1.407	1.106	1.158	0.668	1.701	1.201	0.881	0.682	1.091	0.649	0.591	0.501	0.82	0.728	0.833
P04264	0.456	0.518	0.361	0.133	0.153	0.182	0.272	0.639	0.554	1.522	0.646	0.366	0.471	0.888	0.552	0.784	0.988	0.367	0.909	0.921	2.796	0.857	1.066	1.404	0.984	0.92	1.828	0.503	2.224	1.131	0.938	1.633	0.516	0.748	0.685	0.683	0.857	0.284	1.83	1.1	1.118	1.957	1.156	1.04	0.91	3.869	3.021	1.292	1.182
P63010	0.829	1.529	1.222	0.484	0.353	0.395	0.708	1.358	0.62	1.072	0.755	0.345	0.216	0.459	0.88	1.148	0.831	0.568	1.244	0.89	1.069	0.521	0.903	1.029	0.541	0.501	0.78	0.553	0.966	0.922	0.638	1.445	0.635	1.048	1.317	0.992	1.012	0.601	1.49	1.107	0.931	0.678	1.123	0.634	0.571	0.497	0.848	0.724	0.83
P25205	0.891	1.683	1.319	0.532	0.404	0.416	0.754	1.529	0.622	1.065	0.777	0.355	0.215	0.493	0.903	1.197	0.835	0.581	1.291	0.9	1.086	0.522	0.934	1.061	0.573	0.519	0.786	0.579	1.038	0.974	0.678	1.468	0.647	1.1	1.32	1.055	1.12	0.68	1.652	1.181	0.908	0.699	1.135	0.675	0.596	0.543	0.895	0.783	0.85
Q9Y6N5	0.823	1.554	1.211	0.479	0.384	0.402	0.72	1.391	0.656	1.117	0.784	0.365	0.225	0.503	0.91	1.226	0.81	0.574	1.33	0.877	1.127	0.544	0.959	1.089	0.555	0.51	0.806	0.561	1	0.96	0.646	1.486	0.608	1.075	1.345	1.025	1.092	0.639	1.569	1.186	0.876	0.69	1.142	0.672	0.626	0.513	0.882	0.779	0.841
P46459	0.824	1.557	1.189	0.495	0.38	0.442	0.69	1.418	0.549	0.906	0.627	0.336	0.202	0.418	0.762	0.985	0.721	0.489	1.108	0.757	0.913	0.416	0.758	0.867	0.555	0.486	0.764	0.537	0.934	0.907	0.597	1.425	0.645	1.09	1.308	1.012	1.04	0.607	1.598	1.118	0.884	0.663	1.103	0.633	0.564	0.493	0.834	0.714	0.815
E9PLK3	0.876	1.807	1.43	0.507	0.371	0.392	0.765	1.616	0.613	1.094	0.756	0.342	0.231	0.483	0.978	1.178	0.829	0.548	1.272	0.893	1.097	0.508	0.927	1.092	0.562	0.518	0.818	0.559	0.957	0.928	0.64	1.527	0.634	1.107	1.337	1.03	1.067	0.596	1.576	1.144	0.913	0.69	1.118	0.668	0.61	0.528	0.923	0.754	0.824
P14868	0.852	1.699	1.339	0.5	0.392	0.422	0.808	1.527	0.58	1.025	0.705	0.332	0.204	0.505	0.963	1.093	0.796	0.547	1.263	0.867	1.097	0.504	0.953	1.075	0.572	0.505	0.791	0.586	1.032	0.971	0.673	1.468	0.664	1.141	1.353	1.07	1.108	0.643	1.652	1.157	0.884	0.673	1.115	0.677	0.597	0.521	0.906	0.76	0.845
O60664	0.864	1.61	1.214	0.492	0.388	0.456	0.732	1.468	0.463	0.793	0.602	0.304	0.177	0.442	0.77	0.889	0.756	0.521	1.195	0.808	0.998	0.422	0.814	0.995	0.547	0.465	0.801	0.581	1.051	0.986	0.645	1.492	0.635	1.059	1.452	1.054	1.046	0.509	1.666	1.205	0.916	0.595	1.149	0.573	0.592	0.512	0.799	0.662	0.933
O00160	0.776	1.558	1.26	0.495	0.374	0.386	0.757	1.471	0.541	0.87	0.616	0.316	0.196	0.458	0.788	1.001	0.81	0.55	1.208	0.846	1.055	0.494	0.951	1.015	0.551	0.469	0.767	0.544	0.965	0.958	0.635	1.42	0.618	1.126	1.322	1.034	1.11	0.629	1.602	1.089	0.903	0.685	1.139	0.697	0.631	0.54	0.966	0.737	0.818
Q12906	0.782	1.544	1.153	0.477	0.356	0.405	0.642	1.321	0.594	1.046	0.727	0.325	0.209	0.44	0.809	1.09	0.751	0.539	1.163	0.789	1.016	0.471	0.818	0.953	0.561	0.497	0.783	0.54	0.95	0.916	0.627	1.448	0.645	1.096	1.318	1.016	1.047	0.591	1.584	1.052	0.918	0.661	1.054	0.594	0.545	0.487	0.817	0.658	0.841
P38606	0.848	1.616	1.282	0.49	0.375	0.405	0.797	1.485	0.652	1.148	0.799	0.35	0.214	0.529	1.012	1.251	0.826	0.579	1.318	0.9	1.106	0.503	0.903	1.189	0.576	0.514	0.792	0.582	1.031	0.961	0.645	1.51	0.655	1.116	1.382	1.034	1.074	0.632	1.596	1.162	0.883	0.673	1.114	0.671	0.589	0.519	0.899	0.743	0.858
Q02218	0.845	1.632	1.304	0.514	0.378	0.43	0.748	1.495	0.581	0.978	0.697	0.342	0.203	0.463	0.854	1.054	0.779	0.533	1.172	0.822	0.998	0.485	0.862	1.097	0.557	0.488	0.779	0.551	0.958	0.912	0.608	1.467	0.629	1.108	1.334	1.03	1.106	0.631	1.623	1.144	0.883	0.672	1.084	0.625	0.587	0.504	0.838	0.74	0.839
P49792	0.799	1.525	1.129	0.483	0.373	0.412	0.661	1.329	0.521	0.873	0.6	0.314	0.185	0.394	0.703	0.937	0.695	0.5	1.106	0.712	0.917	0.41	0.765	0.874	0.536	0.525	0.762	0.539	0.926	0.92	0.614	1.404	0.645	1.045	1.269	0.945	1.032	0.582	1.544	1.087	0.907	0.722	1.134	0.661	0.618	0.519	0.919	0.773	0.78
P00491	0.886	1.746	1.386	0.54	0.401	0.474	0.776	1.578	0.57	0.984	0.69	0.332	0.218	0.486	0.891	1.104	0.767	0.531	1.249	0.84	1.07	0.513	0.896	1.014	0.54	0.495	0.807	0.561	1.024	0.984	0.677	1.508	0.614	1.128	1.395	1.063	1.119	0.66	1.728	1.248	0.904	0.667	1.136	0.639	0.559	0.506	0.845	0.72	0.825
Q15084	0.86	1.566	1.242	0.506	0.381	0.411	0.725	1.417	0.527	0.864	0.621	0.32	0.198	0.428	0.758	0.952	0.774	0.541	1.229	0.834	0.993	0.487	0.85	0.957	0.548	0.484	0.784	0.557	0.968	0.933	0.624	1.449	0.631	1.079	1.345	1.019	1.058	0.622	1.596	1.107	0.899	0.644	1.136	0.642	0.577	0.489	0.837	0.727	0.837
P48735	0.873	1.772	1.385	0.494	0.362	0.41	0.763	1.52	0.629	1.105	0.752	0.324	0.202	0.519	0.974	1.168	0.781	0.516	1.248	0.839	1.018	0.476	0.862	0.995	0.543	0.474	0.798	0.53	0.939	0.891	0.586	1.428	0.632	1.094	1.391	1.038	1.039	0.601	1.512	1.159	0.894	0.626	1.106	0.62	0.557	0.479	0.804	0.713	0.833
Q32Q12	0.855	1.562	1.173	0.487	0.364	0.41	0.735	1.291	0.539	0.908	0.659	0.326	0.203	0.517	0.833	0.887	0.807	0.553	1.234	0.885	1.107	0.513	0.917	1.023	0.546	0.47	0.759	0.581	1	0.951	0.615	1.312	0.643	1.067	1.39	1.035	1.022	0.575	1.608	1.169	0.915	0.611	1.105	0.562	0.56	0.518	0.789	0.643	0.803
P14780	0.875	1.703	1.3	0.497	0.381	0.422	0.771	1.537	0.601	1.042	0.74	0.333	0.203	0.51	0.936	1.137	0.808	0.53	1.26	0.859	1.051	0.502	0.882	1.027	0.544	0.477	0.792	0.548	1	0.977	0.633	1.464	0.635	1.097	1.396	1.026	1.101	0.63	1.646	1.191	0.893	0.664	1.174	0.655	0.615	0.546	0.908	0.773	0.857
Q13509	1.063	1.898	1.579	0.623	0.437	0.33	0.757	1.806	0.851	1.575	0.986	0.401	0.325	0.744	1.396	1.683	1.289	0.823	1.42	1.238	1.193	0.935	1.306	0.869	0.549	0.458	0.683	0.577	0.93	0.938	0.705	1.112	0.623	1.093	1.179	1.021	1.171	0.733	1.454	0.967	0.941	0.64	1.122	0.682	0.595	0.526	0.81	0.695
Q9NZ08	0.853	1.608	1.253	0.511	0.384	0.434	0.769	1.47	0.682	1.192	0.857	0.365	0.242	0.546	1.058	1.351	0.803	0.563	1.314	0.898	1.106	0.547	0.949	1.04	0.565	0.507	0.81	0.572	1.005	0.984	0.639	1.499	0.636	1.083	1.383	1.044	1.019	0.643	1.525	1.201	0.887	0.656	1.124	0.649	0.574	0.512	0.865	0.771	0.868
P11216	0.845	1.795	1.372	0.499	0.382	0.429	0.745	1.594	0.636	1.169	0.823	0.364	0.234	0.501	1.025	1.274	0.796	0.556	1.231	0.86	1.072	0.519	0.904	1.078	0.549	0.49	0.806	0.546	0.922	0.906	0.589	1.466	0.631	1.144	1.371	1.081	1.133	0.664	1.657	1.217	0.868	0.662	1.094	0.641	0.573	0.499	0.831	0.741	0.821
P28838	0.896	1.701	1.345	0.547	0.403	0.448	0.805	1.601	0.633	1.101	0.777	0.355	0.22	0.509	0.991	1.227	0.838	0.574	1.34	0.922	1.115	0.548	0.965	1.153	0.578	0.528	0.809	0.574	0.994	0.978	0.643	1.517	0.663	1.127	1.383	1.061	1.086	0.618	1.655	1.203	0.912	0.666	1.122	0.64	0.585	0.507	0.861	0.742	0.838
P00367	0.85	1.604	1.262	0.495	0.374	0.437	0.753	1.472	0.549	0.97	0.696	0.343	0.205	0.444	0.823	1.059	0.731	0.497	1.132	0.778	0.946	0.442	0.788	0.906	0.548	0.489	0.802	0.552	0.96	0.932	0.635	1.475	0.626	1.096	1.358	1.03	1.036	0.609	1.616	1.19	0.9	0.647	1.102	0.625	0.554	0.48	0.831	0.716	0.823
P26599	0.798	1.517	1.184	0.5	0.393	0.407	0.725	1.434	0.542	0.921	0.649	0.328	0.213	0.467	0.8	1.029	0.723	0.517	1.148	0.756	0.958	0.46	0.808	0.898	0.575	0.502	0.793	0.54	0.988	0.958	0.635	1.459	0.605	1.103	1.312	1.003	1.125	0.635	1.683	1.093	0.928	0.682	1.156	0.685	0.616	0.538	0.914	0.74	0.873
P34897	0.855	1.655	1.259	0.489	0.376	0.438	0.742	1.473	0.519	0.9	0.643	0.318	0.192	0.43	0.791	0.972	0.761	0.513	1.195	0.803	0.968	0.461	0.827	0.918	0.552	0.466	0.774	0.549	0.941	0.919	0.615	1.412	0.646	1.107	1.35	1.038	1.055	0.61	1.638	1.15	0.92	0.636	1.125	0.61	0.574	0.501	0.847	0.708	0.868
P49748	0.903	1.756	1.384	0.518	0.395	0.42	0.785	1.637	0.586	1.03	0.723	0.361	0.224	0.478	0.868	1.148	0.858	0.59	1.312	0.94	1.161	0.547	0.983	1.108	0.562	0.489	0.797	0.57	1.025	0.957	0.663	1.499	0.668	1.103	1.366	1.055	1.151	0.646	1.712	1.202	0.917	0.687	1.124	0.655	0.6	0.515	0.912	0.734	0.849
P52566	0.872	1.668	1.353	0.496	0.379	0.429	0.842	1.488	0.502	0.842	0.593	0.304	0.185	0.398	0.753	0.887	0.754	0.533	1.204	0.794	0.982	0.442	0.84	0.932	0.552	0.465	0.772	0.596	1.016	0.972	0.655	1.425	0.662	1.167	1.399	1.109	1.223	0.648	1.814	1.19	0.894	0.659	1.149	0.647	0.584	0.489	0.842	0.673	0.841
E7EVA0	0.777	1.416	1.036	0.449	0.361	0.362	0.594	1.252	0.59	0.98	0.712	0.357	0.219	0.496	0.843	1.085	0.781	0.557	1.17	0.816	1.015	0.49	0.859	0.955	0.574	0.494	0.773	0.656	1.082	1.081	0.729	1.369	0.681	1.019	1.294	0.973	1.072	0.579	1.602	1.11	0.964	0.702	1.196	0.641	0.641	0.553	0.907	0.708	0.856
Q9UHB9	0.784	1.454	1.117	0.473	0.403	0.445	0.794	1.358	0.487	0.809	0.578	0.323	0.198	0.401	0.717	0.91	0.683	0.502	1.11	0.716	0.922	0.418	0.784	0.844	0.564	0.505	0.816	0.581	1.063	1.034	0.682	1.554	0.631	1.152	1.434	1.082	1.195	0.651	1.906	1.188	0.896	0.705	1.185	0.669	0.599	0.522	0.928	0.761	0.863
D3DQV9	0.834	1.62	1.189	0.471	0.403	0.427	0.754	1.432	0.546	0.989	0.711	0.346	0.207	0.473	0.828	1.085	0.822	0.582	1.335	0.878	1.116	0.551	0.989	1.09	0.545	0.482	0.817	0.586	0.979	1.007	0.649	1.462	0.627	1.036	1.377	1.007	1.069	0.609	1.59	1.218	0.878	0.625	1.085	0.602	0.595	0.53	0.823	0.687	0.866
O43143	0.861	1.665	1.302	0.515	0.379	0.419	0.747	1.521	0.662	1.12	0.796	0.348	0.219	0.507	0.967	1.214	0.824	0.567	1.287	0.878	1.082	0.515	0.929	1.092	0.566	0.505	0.8	0.561	0.973	0.934	0.634	1.451	0.624	1.073	1.341	0.984	1.012	0.612	1.472	1.139	0.89	0.666	1.112	0.652	0.581	0.491	0.855	0.729	0.827
A0A1B0GVD5	0.843	1.734	1.372	0.487	0.343	0.405	0.752	1.527	0.602	1.077	0.764	0.341	0.216	0.492	0.917	1.167	0.826	0.534	1.215	0.866	1.077	0.507	0.87	0.99	0.53	0.457	0.767	0.511	0.909	0.873	0.578	1.412	0.639	1.093	1.328	1.01	0.997	0.588	1.559	1.159	0.922	0.636	1.116	0.605	0.557	0.487	0.783	0.714	0.85
P50570	0.863	1.65	1.258	0.508	0.409	0.405	0.783	1.454	0.632	1.095	0.773	0.353	0.224	0.503	0.937	1.171	0.828	0.574	1.232	0.863	1.075	0.522	0.897	1.047	0.579	0.513	0.787	0.588	1.018	0.995	0.664	1.458	0.667	1.097	1.362	1.047	1.093	0.62	1.607	1.151	0.92	0.675	1.114	0.644	0.626	0.536	0.873	0.731	0.877
O95373	0.893	1.681	1.324	0.522	0.406	0.429	0.791	1.537	0.62	1.066	0.778	0.354	0.227	0.51	0.919	1.19	0.769	0.541	1.201	0.831	1.015	0.496	0.854	1.015	0.562	0.501	0.798	0.585	0.983	0.985	0.642	1.51	0.641	1.146	1.411	1.07	1.119	0.661	1.673	1.233	0.897	0.66	1.104	0.633	0.578	0.506	0.825	0.746	0.856
P22234	0.878	1.693	1.372	0.541	0.407	0.458	0.784	1.54	0.568	0.941	0.657	0.333	0.218	0.499	0.896	1.015	0.784	0.525	1.192	0.804	1	0.48	0.841	0.941	0.572	0.494	0.783	0.551	0.98	0.949	0.646	1.453	0.628	1.105	1.35	1.017	1.054	0.621	1.601	1.183	0.919	0.642	1.157	0.651	0.581	0.505	0.845	0.736	0.844
O43175	0.861	1.63	1.264	0.49	0.366	0.427	0.682	1.391	0.591	1.003	0.705	0.322	0.192	0.452	0.829	1.064	0.811	0.541	1.166	0.828	0.987	0.481	0.822	0.939	0.546	0.496	0.762	0.532	0.923	0.89	0.587	1.404	0.721	1.071	1.335	1.013	1.017	0.59	1.559	1.158	0.9	0.652	1.089	0.599	0.54	0.464	0.79	0.707	0.838
P49736	0.828	1.631	1.278	0.507	0.41	0.451	0.781	1.545	0.522	0.904	0.613	0.322	0.186	0.424	0.799	0.955	0.754	0.541	1.196	0.802	1.003	0.45	0.875	0.991	0.574	0.517	0.809	0.57	1.014	0.98	0.662	1.535	0.667	1.138	1.37	1.081	1.164	0.677	1.748	1.244	0.892	0.667	1.102	0.639	0.582	0.492	0.862	0.754	0.837
Q96QK1	0.849	1.641	1.254	0.496	0.367	0.39	0.72	1.412	0.628	1.073	0.769	0.362	0.233	0.489	0.897	1.208	0.91	0.619	1.283	0.921	1.158	0.594	0.918	1.212	0.56	0.524	0.772	0.56	0.968	0.925	0.626	1.514	0.7	1.122	1.34	1.038	1.072	0.644	1.514	1.246	0.978	0.719	1.118	0.64	0.617	0.541	0.828	0.816	0.844
J3KTA4	0.82	1.645	1.295	0.491	0.356	0.386	0.709	1.46	0.598	1.053	0.763	0.337	0.204	0.466	0.812	1.154	0.785	0.517	1.245	0.84	1.002	0.484	0.847	1.008	0.54	0.492	0.816	0.52	0.911	0.863	0.569	1.462	0.618	1.12	1.352	1.015	1.038	0.624	1.517	1.137	0.883	0.675	1.116	0.635	0.534	0.5	0.809	0.712	0.793
P16284	0.891	1.623	1.278	0.525	0.415	0.463	0.761	1.482	0.556	0.912	0.664	0.348	0.202	0.447	0.828	1.003	0.84	0.573	1.235	0.91	1.067	0.517	0.884	1.029	0.595	0.494	0.799	0.614	1.017	0.983	0.659	1.45	0.671	1.083	1.365	1.026	1.03	0.625	1.577	1.114	0.92	0.698	1.178	0.68	0.602	0.512	0.911	0.759	0.87
O94804	0.832	1.618	1.263	0.492	0.373	0.405	0.755	1.448	0.541	0.938	0.662	0.337	0.188	0.435	0.807	1.019	0.716	0.502	1.175	0.786	0.98	0.438	0.832	1.008	0.548	0.485	0.796	0.563	1.008	0.956	0.638	1.479	0.614	1.13	1.358	1.031	1.118	0.612	1.738	1.172	0.862	0.68	1.078	0.64	0.563	0.481	0.846	0.725	0.806
O95352	0.859	1.654	1.304	0.515	0.383	0.408	0.769	1.508	0.666	1.172	0.786	0.339	0.249	0.478	1.011	1.237	0.806	0.558	1.234	0.875	1.085	0.533	0.932	1.018	0.567	0.515	0.806	0.552	0.955	0.936	0.637	1.459	0.653	1.102	1.322	1.02	1.033	0.62	1.519	1.1	0.892	0.672	1.104	0.65	0.6	0.526	0.891	0.747	0.851
P23469	0.866	1.612	1.289	0.504	0.406	0.454	0.726	1.571	0.652	1.105	0.78	0.371	0.233	0.502	0.943	1.259	0.838	0.548	1.257	0.886	1.08	0.558	0.908	1.152	0.557	0.519	0.804	0.551	0.976	0.983	0.629	1.566	0.664	1.07	1.364	1.023	1.055	0.624	1.563	1.187	0.871	0.675	1.081	0.615	0.607	0.491	0.837	0.76	0.847
P55160	0.782	1.517	1.164	0.502	0.386	0.403	0.704	1.351	0.527	0.911	0.634	0.319	0.214	0.406	0.782	1.007	0.75	0.548	1.197	0.806	1.001	0.483	0.855	0.954	0.566	0.519	0.816	0.589	1.039	0.972	0.686	1.556	0.618	1.069	1.327	1.004	1.043	0.61	1.605	1.097	0.886	0.672	1.104	0.645	0.596	0.506	0.867	0.727	0.779
P51858	0.827	1.39	1.093	0.506	0.392	0.439	0.808	1.36	0.523	0.835	0.622	0.346	0.182	0.386	0.679	0.957	0.754	0.537	1.199	0.862	1.027	0.448	0.851	0.996	0.551	0.476	0.829	0.597	1.003	1	0.668	1.438	0.667	1.116	1.434	1.039	1.113	0.59	1.767	1.201	0.885	0.665	1.157	0.655	0.56	0.49	0.803	0.673	0.856
Q96KP4	0.842	1.666	1.277	0.505	0.399	0.431	0.722	1.502	0.554	0.979	0.701	0.333	0.205	0.468	0.889	1.078	0.814	0.575	1.257	0.891	1.082	0.513	0.913	1.016	0.566	0.493	0.79	0.563	0.99	0.944	0.62	1.427	0.637	1.103	1.326	1.007	1.048	0.618	1.547	1.125	0.874	0.648	1.099	0.628	0.559	0.474	0.82	0.713	0.866
Q8TEX9	0.91	1.799	1.352	0.543	0.414	0.438	0.798	1.619	0.616	1.108	0.806	0.378	0.239	0.514	0.959	1.226	0.886	0.607	1.386	0.961	1.227	0.611	1.003	1.254	0.585	0.531	0.807	0.607	1.027	0.972	0.713	1.497	0.658	1.092	1.352	1.052	1.121	0.691	1.606	1.189	0.926	0.691	1.105	0.678	0.665	0.573	0.947	0.817	0.845
Q13576	0.839	1.608	1.241	0.532	0.396	0.427	0.737	1.5	0.563	0.972	0.684	0.337	0.192	0.463	0.847	1.111	0.767	0.539	1.259	0.872	1.058	0.539	0.921	1.103	0.557	0.495	0.759	0.559	1.006	0.954	0.637	1.43	0.639	1.161	1.348	1.085	1.215	0.675	1.799	1.175	0.885	0.647	1.061	0.653	0.579	0.518	0.848	0.72	0.846
Q32MZ4	0.834	1.475	1.111	0.492	0.391	0.441	0.746	1.364	0.508	0.852	0.612	0.316	0.176	0.438	0.739	0.914	0.757	0.53	1.192	0.809	0.964	0.46	0.83	0.978	0.542	0.44	0.737	0.553	0.915	0.944	0.588	1.352	0.657	1.091	1.363	1.008	1.062	0.587	1.613	1.168	0.908	0.663	1.144	0.628	0.574	0.489	0.817	0.699	0.846
Q15418	0.826	1.664	1.286	0.516	0.405	0.416	0.771	1.5	0.53	0.93	0.653	0.332	0.222	0.446	0.834	1.034	0.837	0.576	1.329	0.884	1.106	0.544	0.981	1.071	0.563	0.509	0.791	0.559	1	0.962	0.639	1.502	0.624	1.084	1.296	0.976	1.042	0.624	1.597	1.128	0.883	0.658	1.058	0.625	0.575	0.475	0.82	0.706	0.842
P06748	0.83	1.513	1.195	0.475	0.352	0.448	0.716	1.372	0.513	0.856	0.625	0.305	0.196	0.418	0.733	0.937	0.756	0.497	1.167	0.765	0.957	0.405	0.765	0.968	0.55	0.464	0.771	0.535	0.935	0.911	0.578	1.446	0.622	1.109	1.331	0.973	1.013	0.572	1.644	1.055	0.948	0.682	1.158	0.626	0.545	0.476	0.802	0.656	0.849
O15523	0.82	1.674	1.313	0.518	0.415	0.457	0.735	1.53	0.548	0.996	0.697	0.344	0.211	0.46	0.827	1.114	0.768	0.559	1.278	0.831	1.046	0.506	0.885	1.047	0.591	0.526	0.81	0.577	1.019	0.948	0.674	1.482	0.59	1.095	1.297	0.95	1.032	0.621	1.64	1.071	0.852	0.634	1.114	0.624	0.554	0.554	0.902	0.713	0.771
E5RK69	0.699	1.193	0.831	0.634	0.476	0.435	0.794	1.336	0.561	0.916	0.642	0.406	0.271	0.455	0.811	0.994									0.418	0.442	0.813	0.69	1.059	1.003	0.691	1.516	0.77	1.13	1.351	1.258	1.264	0.652	1.829	1.253	0.886	0.72	1.157	0.718	0.656	0.514	0.821	0.799	0.726
Q13310	0.823	1.8	1.408	0.514	0.374	0.425	0.721	1.6	0.614	1.127	0.755	0.335	0.194	0.496	0.942	1.205	0.801	0.535	1.306	0.837	1.065	0.485	0.871	1.024	0.545	0.485	0.772	0.541	0.951	0.906	0.611	1.422	0.62	1.063	1.328	0.987	1.034	0.589	1.531	1.114	0.944	0.683	1.127	0.636	0.568	0.488	0.856	0.731	0.815
P63244	0.811	1.494	1.164	0.488	0.357	0.43	0.654	1.299	0.546	0.923	0.64	0.314	0.19	0.399	0.726	0.969	0.704	0.484	1.152	0.731	0.931	0.4	0.727	0.901	0.56	0.497	0.785	0.513	0.923	0.864	0.574	1.445	0.617	1.072	1.304	0.955	0.97	0.587	1.483	1.084	0.886	0.674	1.084	0.627	0.535	0.476	0.807	0.714	0.813
Q06210	0.86	1.615	1.273	0.52	0.405	0.409	0.789	1.446	0.555	0.907	0.646	0.335	0.204	0.448	0.856	0.99	0.794	0.578	1.315	0.874	1.127	0.527	1.003	1.094	0.569	0.512	0.816	0.597	1.043	1.013	0.683	1.497	0.653	1.12	1.369	1.078	1.155	0.681	1.667	1.203	0.907	0.679	1.15	0.661	0.604	0.529	0.927	0.757	0.846
P49915	0.856	1.649	1.284	0.508	0.412	0.431	0.739	1.495	0.525	0.886	0.612	0.328	0.195	0.416	0.815	0.962	0.743	0.531	1.177	0.817	1.008	0.47	0.861	0.973	0.561	0.483	0.77	0.553	0.985	0.939	0.618	1.489	0.669	1.133	1.364	1.121	1.077	0.625	1.714	1.173	0.911	0.675	1.119	0.649	0.58	0.493	0.849	0.728	0.862
Q5T6W2																									0.585	0.535	0.758	0.545	0.913	0.898	0.669	1.371	0.665	1.225	1.448	1.136	1.228	0.641	1.892	1.222	0.96	0.701	1.093	0.672	0.571	0.503	0.833	0.687	0.97
P22626	0.729	1.491	1.082	0.503	0.358	0.419	0.646	1.252	0.494	0.807	0.488	0.256	0.188	0.394	0.682	0.84	0.615	0.473	1.077	0.598	0.865	0.377	0.778	0.779	0.572	0.53	0.796	0.499	0.995	0.919	0.655	1.419	0.588	1.116	1.335	1.064	1.186	0.674	1.767	1.044	0.891	0.689	1.043	0.702	0.551	0.472	0.891	0.679	0.808
Q13177	0.868	1.749	1.349	0.517	0.373	0.414	0.749	1.549	0.578	1.048	0.727	0.342	0.201	0.476	0.85	1.138	0.763	0.517	1.194	0.848	1.007	0.456	0.835	0.958	0.549	0.496	0.779	0.549	0.937	0.909	0.603	1.43	0.637	1.068	1.324	1.006	0.995	0.59	1.53	1.125	0.915	0.661	1.115	0.649	0.571	0.486	0.848	0.715	0.816
Q9Y5B9	0.844	1.641	1.107	0.476	0.35	0.4	0.677	1.337	0.577	0.912	0.58	0.292	0.162	0.414	0.76	0.955	0.717	0.48	1.019	0.667	0.991	0.427	0.76	0.862	0.48	0.445	0.72	0.48	0.835	0.822	0.565	1.237	0.61	1.098	1.345	1.016	1.057	0.611	1.587	1.134	0.897	0.676	1.108	0.636	0.567	0.503	0.852	0.75	0.821
P14317	0.843	1.569	1.216	0.537	0.413	0.471	0.714	1.46	0.517	0.827	0.6	0.335	0.195	0.453	0.75	0.949	0.722	0.52	1.159	0.762	0.942	0.411	0.785	0.894	0.552	0.471	0.771	0.58	1.021	0.96	0.629	1.407	0.629	1.072	1.344	0.997	1.076	0.57	1.708	1.11	0.914	0.682	1.169	0.658	0.571	0.487	0.858	0.712	0.873
O00571	0.787	1.593	1.267	0.489	0.406	0.462	0.744	1.475	0.544	1.034	0.729	0.357	0.241	0.487	0.857	1.177	0.742	0.525	1.236	0.83	0.995	0.455	0.873	1.118	0.601	0.517	0.809	0.562	0.988	1.032	0.657	1.489	0.567	1.111	1.288	0.975	0.973	0.657	1.647	1.12	0.798	0.615	1.184	0.624	0.529	0.543	0.88	0.724	0.699
O76094	0.817	1.549	1.217	0.484	0.368	0.399	0.704	1.37	0.581	1.017	0.733	0.343	0.199	0.47	0.859	1.12	0.8	0.55	1.248	0.85	1.054	0.517	0.904	1.016	0.553	0.502	0.798	0.599	1.033	1.023	0.673	1.458	0.631	1.104	1.375	1.055	1.138	0.647	1.704	1.182	0.91	0.661	1.168	0.653	0.589	0.54	0.909	0.773	0.84
Q96G03	0.878	1.622	1.26	0.505	0.382	0.413	0.762	1.413	0.611	1.022	0.714	0.337	0.219	0.49	0.905	1.098	0.867	0.583	1.263	0.885	1.065	0.519	0.922	1.051	0.56	0.498	0.786	0.573	0.996	0.966	0.633	1.439	0.672	1.113	1.342	1.055	1.072	0.637	1.633	1.159	0.902	0.676	1.105	0.65	0.559	0.495	0.825	0.744	0.824
Q9UQE7	0.853	1.604	1.253	0.513	0.427	0.409	0.736	1.505	0.512	0.861	0.598	0.329	0.207	0.433	0.82	0.964	0.862	0.594	1.282	0.897	1.141	0.548	1.031	1.123	0.589	0.501	0.777	0.583	1.042	1.032	0.695	1.551	0.629	1.101	1.349	1.024	1.159	0.644	1.712	1.184	0.905	0.7	1.127	0.66	0.613	0.529	0.931	0.723	0.821
Q16531	0.889	1.626	1.29	0.522	0.398	0.393	0.777	1.491	0.626	1.072	0.764	0.362	0.234	0.48	0.932	1.198	0.902	0.617	1.399	0.959	1.271	0.605	1.048	1.208	0.581	0.506	0.802	0.591	1.058	1.006	0.676	1.564	0.638	1.133	1.374	1.055	1.157	0.679	1.655	1.225	0.923	0.694	1.117	0.708	0.643	0.56	0.97	0.817	0.868
Q14240	0.841	1.532	1.203	0.531	0.42	0.466	0.724	1.453	0.666	1.2	0.875	0.352	0.224	0.549	1.121	1.299	0.748	0.522	1.162	0.808	0.963	0.472	0.843	0.932	0.551	0.503	0.765	0.565	1.005	0.968	0.648	1.409	0.649	1.108	1.387	1.074	1.124	0.655	1.645	1.177	0.887	0.674	1.119	0.661	0.576	0.505	0.874	0.726	0.844
A0A1W2PQ51	0.805	1.618	1.269	0.47	0.358	0.395	0.725	1.445	0.638	1.165	0.816	0.33	0.214	0.507	1.005	1.263	0.752	0.503	1.195	0.778	0.991	0.447	0.833	1.003	0.547	0.486	0.812	0.532	0.962	0.917	0.635	1.498	0.614	1.13	1.381	0.996	1.014	0.612	1.566	1.109	0.877	0.663	1.119	0.613	0.56	0.497	0.838	0.694	0.799
P43304	0.848	1.585	1.243	0.527	0.411	0.425	0.738	1.446	0.585	0.986	0.693	0.354	0.232	0.461	0.862	1.103	0.817	0.559	1.237	0.882	1.072	0.527	0.931	0.958	0.573	0.497	0.798	0.582	1.036	1.004	0.683	1.529	0.608	1.085	1.402	1.073	1.115	0.61	1.594	1.144	0.917	0.694	1.141	0.693	0.617	0.556	0.942	0.784	0.843
P48444	0.845	1.68	1.295	0.492	0.391	0.417	0.774	1.539	0.591	1.017	0.719	0.332	0.21	0.489	0.91	1.115	0.784	0.542	1.257	0.836	1.062	0.495	0.909	1.058	0.548	0.502	0.794	0.563	1.014	0.98	0.658	1.434	0.62	1.11	1.32	1.025	1.106	0.631	1.642	1.147	0.898	0.669	1.121	0.652	0.591	0.519	0.881	0.735	0.818
O43242	0.862	1.645	1.289	0.527	0.408	0.44	0.72	1.501	0.584	1.018	0.692	0.347	0.215	0.411	0.776	1.067	0.762	0.539	1.172	0.801	0.959	0.465	0.815	0.9	0.581	0.514	0.773	0.582	1.028	0.991	0.666	1.497	0.654	1.139	1.321	1.038	1.132	0.652	1.649	1.179	0.899	0.693	1.102	0.648	0.566	0.499	0.853	0.725	0.858
P31146	0.825	1.524	1.195	0.48	0.353	0.428	0.666	1.331	0.555	0.925	0.654	0.331	0.2	0.408	0.756	0.984	0.74	0.519	1.207	0.783	0.985	0.44	0.82	0.932	0.554	0.501	0.786	0.547	0.963	0.912	0.622	1.453	0.631	1.116	1.388	1.002	1.077	0.594	1.665	1.147	0.888	0.662	1.108	0.614	0.551	0.473	0.836	0.704	0.811
P47897	0.837	1.602	1.206	0.489	0.387	0.452	0.765	1.444	0.598	1.046	0.736	0.344	0.212	0.464	0.959	1.144	0.796	0.536	1.249	0.844	1.098	0.509	0.872	1.096	0.574	0.531	0.833	0.588	1.061	0.992	0.669	1.543	0.633	1.136	1.422	1.062	1.112	0.647	1.632	1.228	0.865	0.673	1.111	0.664	0.629	0.539	0.945	0.805	0.885
O00299	0.884	1.576	1.226	0.496	0.376	0.413	0.718	1.359	0.563	0.954	0.675	0.325	0.201	0.41	0.763	1.01	0.818	0.558	1.183	0.847	0.996	0.491	0.831	0.951	0.536	0.469	0.758	0.536	0.923	0.908	0.602	1.396	0.608	1.086	1.322	1	1.02	0.575	1.529	1.106	0.921	0.641	1.097	0.571	0.549	0.468	0.755	0.654	0.862
P11940	0.86	1.609	1.289	0.532	0.395	0.452	0.759	1.487	0.555	0.954	0.681	0.356	0.208	0.449	0.812	1.061	0.763	0.547	1.259	0.808	1.027	0.491	0.869	0.943	0.581	0.509	0.859	0.58	1.055	0.987	0.665	1.514	0.631	1.101	1.317	0.974	1.119	0.577	1.796	1.114	0.915	0.702	1.145	0.675	0.599	0.499	0.86	0.71	0.82
P27708	0.838	1.691	1.314	0.514	0.395	0.419	0.757	1.557	0.595	1.031	0.739	0.33	0.219	0.481	0.963	1.161	0.817	0.562	1.293	0.857	1.13	0.51	0.966	1.063	0.572	0.517	0.784	0.591	1.048	1.011	0.683	1.494	0.668	1.134	1.417	1.105	1.122	0.709	1.695	1.244	0.934	0.684	1.118	0.704	0.637	0.545	0.933	0.774	0.799
P62258	0.872	1.674	1.32	0.514	0.359	0.425	0.763	1.495	0.601	1.053	0.734	0.343	0.196	0.488	0.864	1.105	0.777	0.518	1.138	0.834	1.001	0.466	0.822	0.951	0.557	0.494	0.788	0.557	0.937	0.881	0.592	1.402	0.692	1.093	1.38	1.024	1.037	0.623	1.589	1.165	0.93	0.698	1.132	0.651	0.562	0.493	0.84	0.737	0.849
P17980	0.862	1.759	1.362	0.502	0.371	0.42	0.755	1.584	0.577	1.043	0.729	0.327	0.193	0.491	0.919	1.136	0.769	0.502	1.18	0.82	0.986	0.454	0.82	0.978	0.545	0.498	0.798	0.558	0.993	0.944	0.632	1.477	0.642	1.087	1.341	1.01	1.041	0.611	1.578	1.158	0.911	0.652	1.105	0.626	0.555	0.475	0.818	0.731	0.88
P50454	0.787	1.572	1.221	0.462	0.37	0.405	0.791	1.422	0.551	0.942	0.684	0.345	0.201	0.45	0.862	1.038	0.754	0.529	1.186	0.814	0.995	0.476	0.871	0.949	0.561	0.489	0.78	0.561	0.983	0.954	0.635	1.455	0.631	1.11	1.342	1.016	1.107	0.634	1.621	1.161	0.866	0.637	1.109	0.635	0.563	0.484	0.812	0.702	0.851
Q15067	0.838	1.705	1.291	0.514	0.372	0.388	0.752	1.452	0.605	1.068	0.728	0.339	0.213	0.472	0.95	1.116	0.777	0.574	1.298	0.868	1.091	0.517	0.942	1.019	0.548	0.487	0.786	0.589	0.999	0.969	0.656	1.452	0.639	1.108	1.39	1.082	1.107	0.674	1.642	1.184	0.89	0.664	1.093	0.646	0.569	0.505	0.824	0.701	0.842
P61981	0.824	1.494	1.16	0.489	0.357	0.416	0.705	1.311	0.581	0.936	0.65	0.329	0.193	0.445	0.759	0.988	0.78	0.512	1.157	0.818	0.956	0.436	0.795	0.886	0.551	0.479	0.762	0.549	0.925	0.902	0.605	1.325	0.673	1.057	1.321	1.002	1.005	0.587	1.532	1.082	0.892	0.65	1.093	0.588	0.514	0.448	0.75	0.667	0.835
P37802	0.645	1.712	0.687	0.316	0.217	0.245	0.538	0.935	0.412	1.075	0.774	0.282	0.152	0.712	0.546	0.659	0.496	0.387	1.308	0.704	1.072	0.362	0.886	0.789	0.549	0.376	0.421	0.423	0.936	1.011	0.437	0.876	0.561	0.602	1.411	0.657	0.58	0.474	1.033	1.025	0.944	0.597	0.93	0.554	0.67	0.533	0.567	0.473	0.659
P04899	0.825	1.672	1.307	0.479	0.37	0.404	0.791	1.485	0.512	0.84	0.609	0.297	0.202	0.433	0.789	0.948	0.765	0.529	1.194	0.809	0.999	0.469	0.868	0.914	0.559	0.498	0.786	0.545	0.967	0.947	0.626	1.362	0.64	1.096	1.35	1.051	1.046	0.639	1.638	1.109	0.914	0.683	1.121	0.684	0.575	0.497	0.883	0.761	0.859
P21796	0.93	1.632	1.335	0.548	0.397	0.466	0.694	1.559	0.53	0.882	0.63	0.325	0.205	0.386	0.687	1.001	0.762	0.499	1.279	0.831	0.969	0.447	0.762	0.978	0.58	0.498	0.814	0.545	0.935	0.93	0.592	1.512	0.642	1.012	1.312	0.959	1.081	0.618	1.647	1.1	0.856	0.648	1.139	0.635	0.53	0.463	0.851	0.698	0.804
P67809	0.804	1.319	1.023	0.574	0.459	0.505	0.703	1.308	0.398	0.592	0.425	0.286	0.16	0.353	0.555	0.699	0.708	0.568	1.221	0.767	0.978	0.418	0.805	0.741	0.587	0.494	0.806	0.621	1.086	1.112	0.696	1.39	0.67	1.151	1.516	1.094	1.188	0.643	1.984	1.063	0.905	0.613	1.131	0.635	0.545	0.503	0.851	0.622	0.866
P28331	0.898	1.71	1.318	0.539	0.409	0.443	0.819	1.575	0.724	1.229	0.861	0.363	0.227	0.596	1.111	1.377	0.85	0.598	1.318	0.919	1.106	0.576	0.988	1.05	0.578	0.518	0.795	0.615	1.048	1.013	0.7	1.509	0.653	1.162	1.36	1.07	1.106	0.667	1.589	1.198	0.921	0.715	1.134	0.67	0.613	0.558	0.901	0.769	0.839
P45974	0.875	1.749	1.39	0.533	0.405	0.461	0.823	1.632	0.567	1.022	0.723	0.338	0.204	0.482	0.873	1.113	0.777	0.536	1.223	0.849	1.055	0.502	0.918	0.995	0.587	0.496	0.791	0.591	1.067	1.031	0.692	1.539	0.61	1.118	1.366	1.054	1.165	0.671	1.755	1.201	0.919	0.664	1.158	0.688	0.624	0.537	0.933	0.791	0.876
P54578	0.873	1.694	1.34	0.524	0.423	0.476	0.823	1.571	0.601	1.021	0.726	0.353	0.215	0.521	0.962	1.176	0.776	0.549	1.233	0.846	1.026	0.493	0.869	0.948	0.57	0.49	0.813	0.578	0.995	0.969	0.644	1.471	0.66	1.11	1.353	1.053	1.09	0.632	1.672	1.137	0.881	0.637	1.161	0.688	0.594	0.534	0.915	0.75	0.875
Q14980	0.84	1.586	1.175	0.529	0.444	0.47	0.732	1.502	0.518	0.849	0.598	0.331	0.211	0.403	0.73	0.947	0.759	0.567	1.229	0.793	1.026	0.47	0.882	0.994	0.594	0.532	0.832	0.597	1.083	1.064	0.719	1.565	0.669	1.218	1.372	1.066	1.249	0.679	1.92	1.219	0.917	0.728	1.147	0.69	0.65	0.557	0.934	0.776	0.792
Q99613	0.889	1.699	1.339	0.526	0.382	0.408	0.747	1.49	0.589	0.983	0.707	0.342	0.213	0.479	0.894	1.086	0.747	0.516	1.169	0.784	0.969	0.468	0.831	0.947	0.567	0.505	0.802	0.545	0.969	0.947	0.621	1.434	0.637	1.106	1.339	1.019	1.069	0.635	1.626	1.142	0.894	0.692	1.119	0.672	0.603	0.53	0.899	0.777	0.802
Q96TA1	0.865	1.63	1.251	0.511	0.413	0.449	0.811	1.51	0.594	1.035	0.753	0.352	0.221	0.484	0.917	1.159	0.843	0.544	1.232	0.876	1.042	0.493	0.893	1.049	0.556	0.488	0.809	0.569	0.992	0.959	0.646	1.48	0.647	1.061	1.364	1.008	1.033	0.556	1.561	1.137	0.899	0.625	1.109	0.596	0.599	0.508	0.814	0.715	0.903
E9PK25	0.832	1.646	1.29	0.5	0.354	0.407	0.71	1.389	0.64	1.082	0.752	0.337	0.208	0.468	0.853	1.121	0.733	0.503	1.101	0.773	0.909	0.404	0.713	0.881	0.584	0.511	0.771	0.534	0.933	0.854	0.592	1.334	0.653	1.073	1.27	0.981	1.001	0.599	1.517	1.053	0.906	0.696	1.043	0.597	0.5	0.418	0.778	0.674	0.775
P50552	0.809	1.611	1.248	0.459	0.352	0.407	0.773	1.37	0.52	0.863	0.571	0.302	0.185	0.415	0.786	0.882	0.727	0.52	1.231	0.778	0.996	0.426	0.846	1.008	0.532	0.482	0.786	0.557	1.008	0.971	0.628	1.423	0.626	1.094	1.381	1.026	1.109	0.597	1.68	1.135	0.887	0.67	1.122	0.617	0.552	0.482	0.834	0.697	0.881
P12270	0.84	1.56	1.193	0.524	0.423	0.44	0.749	1.474	0.547	0.958	0.655	0.329	0.212	0.472	0.82	0.999	0.736	0.542	1.161	0.783	1.023	0.457	0.838	0.953	0.566	0.52	0.798	0.556	1.033	0.991	0.663	1.451	0.607	0.987	1.31	0.998	1.153	0.6	1.726	1.192	0.897	0.696	1.107	0.629	0.592	0.496	0.924	0.777	0.81
Q05639	0.89	1.682	1.277	0.493	0.426	0.41	0.761	1.523	0.924	1.507	0.982	0.327	0.201	0.5	1.342	1.793	0.973	0.794	1.721	1.161	1.457	0.654	1.476	1.6	0.504	0.438	0.712	0.503	0.916	1.068	0.749	1.4	0.651	1.132	1.32	0.934	1.107	0.667	1.433	0.957									0.752
P42224	0.869	1.809	1.411	0.518	0.37	0.412	0.745	1.598	0.613	1.109	0.786	0.347	0.218	0.472	0.917	1.211	0.775	0.533	1.216	0.839	1.04	0.496	0.895	1.036	0.562	0.508	0.814	0.574	0.986	0.958	0.62	1.505	0.634	1.073	1.281	1.022	1.061	0.63	1.602	1.177	0.89	0.671	1.104	0.674	0.636	0.51	0.9	0.78	0.839
P11413	0.847	1.655	1.302	0.509	0.381	0.42	0.702	1.466	0.634	1.079	0.749	0.336	0.215	0.467	0.946	1.157	0.765	0.509	1.199	0.824	1.009	0.469	0.848	0.966	0.552	0.499	0.803	0.561	0.985	0.939	0.636	1.442	0.61	1.09	1.34	1.037	1.094	0.632	1.595	1.14	0.885	0.654	1.093	0.655	0.577	0.495	0.839	0.718	0.828
Q92973	0.826	1.564	1.234	0.47	0.376	0.386	0.811	1.468	0.654	1.125	0.835	0.356	0.24	0.56	1.059	1.269	0.835	0.552	1.275	0.902	1.106	0.535	0.913	1.107	0.565	0.5	0.786	0.591	1.034	1.004	0.671	1.522	0.653	1.127	1.43	1.075	1.08	0.659	1.541	1.239	0.897	0.632	1.155	0.648	0.609	0.528	0.906	0.755	0.9
Q16891	0.884	1.595	1.303	0.519	0.397	0.43	0.727	1.514	0.553	0.91	0.661	0.336	0.201	0.43	0.731	1.034	0.775	0.514	1.2	0.797	0.944	0.458	0.806	0.94	0.587	0.5	0.812	0.556	0.98	0.988	0.627	1.529	0.65	1.005	1.278	0.966	1.024	0.586	1.545	1.143	0.866	0.624	1.095	0.592	0.534	0.472	0.827	0.704	0.771
P33992	0.851	1.701	1.345	0.52	0.416	0.445	0.755	1.596	0.576	1.013	0.696	0.336	0.227	0.456	0.875	1.14	0.752	0.551	1.239	0.803	1.022	0.493	0.861	1.008	0.56	0.506	0.813	0.586	1.042	1.001	0.67	1.536	0.655	1.155	1.362	1.07	1.183	0.704	1.751	1.202	0.919	0.71	1.131	0.678	0.631	0.547	0.939	0.771	0.833
Q14566	0.855	1.644	1.289	0.523	0.403	0.438	0.778	1.51	0.542	0.889	0.622	0.33	0.208	0.474	0.824	0.993	0.836	0.591	1.31	0.87	1.118	0.529	0.996	1.113	0.587	0.507	0.806	0.598	1.071	1.028	0.699	1.547	0.639	1.171	1.415	1.104	1.192	0.695	1.802	1.247	0.899	0.692	1.136	0.683	0.609	0.529	0.885	0.752	0.845
O14617	0.867	1.772	1.352	0.512	0.408	0.412	0.827	1.616	0.657	1.151	0.809	0.384	0.242	0.533	1.088	1.289	0.814	0.565	1.278	0.859	1.113	0.528	0.938	1.091	0.605	0.53	0.82	0.598	1.053	0.989	0.688	1.56	0.642	1.062	1.273	0.996	1.098	0.669	1.536	1.17	0.903	0.674	1.111	0.664	0.598	0.537	0.918	0.8	0.855
B2R5W2	0.782	1.601	1.19	0.494	0.354	0.391	0.694	1.382	0.578	1.037	0.679	0.283	0.178	0.427	0.817	1.049	0.799	0.561	1.28	0.838	1.089	0.516	0.922	1.051	0.552	0.467	0.782	0.495	0.92	0.905	0.597	1.333	0.607	1.073	1.273	1.054	1.041	0.598	1.458	0.984	0.97	0.692	1.005	0.646	0.546	0.489	0.799	0.618	0.859
O60271	0.82	1.523	1.174	0.501	0.393	0.448	0.729	1.395	0.507	0.868	0.62	0.329	0.19	0.414	0.78	0.966	0.808	0.588	1.278	0.896	1.076	0.499	0.94	1.013	0.57	0.489	0.807	0.584	1.031	1.007	0.674	1.497	0.661	1.088	1.357	1.036	1.067	0.604	1.641	1.134	0.904	0.675	1.143	0.671	0.583	0.526	0.894	0.733	0.835
O43390	0.846	1.76	1.319	0.523	0.406	0.448	0.771	1.571	0.518	0.945	0.649	0.305	0.185	0.406	0.797	0.982	0.713	0.506	1.114	0.742	0.941	0.439	0.771	0.918	0.554	0.475	0.785	0.538	0.984	0.932	0.623	1.475	0.624	1.127	1.326	1.089	1.082	0.626	1.625	1.124	0.907	0.67	1.07	0.632	0.556	0.487	0.81	0.689	0.865
G8JLD5	0.859	1.685	1.311	0.51	0.38	0.399	0.74	1.591	0.732	1.315	0.925	0.383	0.253	0.594	1.149	1.446	0.869	0.6	1.249	0.871	1.107	0.559	0.908	1.026	0.575	0.503	0.797	0.583	1.048	1.017	0.685	1.511	0.661	1.096	1.333	1.015	1.114	0.639	1.663	1.182	0.918	0.709	1.119	0.647	0.604	0.553	0.906	0.76	0.89
P08240	0.849	1.67	1.314	0.5	0.393	0.423	0.76	1.554	0.594	1.031	0.711	0.326	0.197	0.477	0.919	1.132	0.762	0.513	1.21	0.81	1.013	0.468	0.859	1.004	0.555	0.493	0.777	0.562	1.003	0.952	0.642	1.431	0.627	1.086	1.356	1.039	1.079	0.623	1.642	1.195	0.889	0.674	1.135	0.669	0.596	0.507	0.886	0.743	0.833
P07954	0.876	1.679	1.311	0.521	0.401	0.411	0.765	1.512	0.594	0.993	0.716	0.348	0.209	0.466	0.871	1.106	0.789	0.553	1.23	0.842	1.062	0.497	0.893	1.049	0.553	0.5	0.777	0.579	0.979	0.945	0.656	1.458	0.659	1.098	1.341	1.037	1.108	0.65	1.662	1.167	0.921	0.695	1.134	0.665	0.599	0.527	0.895	0.742	0.854
P55265	0.813	1.562	1.225	0.517	0.397	0.41	0.705	1.418	0.566	0.999	0.711	0.32	0.201	0.486	0.878	1.093	0.751	0.525	1.237	0.819	1.037	0.476	0.869	1.029	0.57	0.496	0.804	0.557	0.989	0.958	0.638	1.457	0.638	1.1	1.331	1.015	1.088	0.621	1.651	1.104	0.923	0.668	1.109	0.645	0.603	0.526	0.877	0.709	0.855
P61160	0.846	1.739	1.363	0.486	0.356	0.426	0.767	1.502	0.613	1.084	0.724	0.33	0.197	0.484	0.958	1.133	0.733	0.485	1.185	0.775	1.015	0.425	0.81	1.043	0.539	0.485	0.786	0.53	0.986	0.897	0.607	1.477	0.628	1.078	1.37	1.02	1.089	0.613	1.594	1.197	0.882	0.687	1.119	0.64	0.6	0.503	0.908	0.764	0.838
P51149	0.867	1.685	1.361	0.51	0.392	0.447	0.808	1.56	0.548	0.999	0.698	0.33	0.205	0.458	0.923	1.111	0.783	0.518	1.24	0.809	1.035	0.482	0.868	1.028	0.535	0.461	0.774	0.54	0.99	0.943	0.639	1.459	0.596	1.118	1.344	0.998	1.099	0.633	1.692	1.189	0.878	0.648	1.136	0.626	0.577	0.497	0.9	0.722	0.829
A5YKK6	0.868	1.638	1.242	0.512	0.419	0.418	0.786	1.502	0.663	1.137	0.834	0.364	0.247	0.585	1.042	1.25	0.877	0.617	1.342	0.961	1.195	0.622	1.06	1.166	0.581	0.54	0.799	0.582	1.065	1.035	0.74	1.497	0.672	1.108	1.355	1.1	1.1	0.709	1.608	1.188	0.942	0.676	1.177	0.697	0.617	0.566	0.934	0.758	0.871
P14866	0.76	1.551	1.128	0.483	0.34	0.427	0.697	1.378	0.516	0.889	0.589	0.283	0.177	0.412	0.733	0.96	0.761	0.523	1.292	0.773	1.076	0.48	0.898	1.038	0.545	0.474	0.773	0.514	0.973	0.948	0.623	1.427	0.632	1.149	1.432	1.068	1.126	0.616	1.731	1.145	0.936	0.655	1.147	0.678	0.614	0.543	0.958	0.71	0.832
Q9UBT2	0.871	1.631	1.282	0.509	0.384	0.422	0.715	1.507	0.573	0.98	0.694	0.344	0.204	0.438	0.818	1.063	0.799	0.551	1.238	0.858	1.021	0.505	0.877	0.99	0.545	0.498	0.783	0.556	0.966	0.936	0.621	1.451	0.664	1.086	1.315	1.033	1.039	0.612	1.539	1.124	0.884	0.653	1.092	0.624	0.556	0.484	0.822	0.7	0.859
Q06323	0.782	1.707	1.099	0.391	0.295	0.389	0.626	1.287	0.522	0.98	0.67	0.347	0.182	0.444	0.711	0.843	0.678	0.494	0.968	0.743	0.929	0.386	0.739	0.798	0.464	0.439	0.604	0.526	0.856	0.782	0.521	1.216	0.615	0.76	1.202	0.844	0.828	0.433	1.381	1.024	0.888	0.569	1.125	0.512	0.536	0.475	0.665	0.563	1.012
O75534	0.834	1.555	1.178	0.487	0.403	0.447	0.707	1.461	0.49	0.825	0.588	0.325	0.197	0.387	0.711	0.945	0.781	0.56	1.23	0.82	1.043	0.497	0.907	1.02	0.553	0.497	0.774	0.532	0.974	0.937	0.647	1.434	0.628	1.089	1.275	0.991	1.06	0.622	1.624	1.107	0.916	0.719	1.126	0.686	0.619	0.522	0.946	0.756	0.83
P55884	0.856	1.753	1.392	0.518	0.387	0.428	0.798	1.611	0.6	1.064	0.733	0.34	0.21	0.48	0.906	1.161	0.78	0.538	1.266	0.858	1.069	0.492	0.895	1.09	0.569	0.497	0.804	0.545	0.978	0.937	0.615	1.492	0.638	1.132	1.381	1.025	1.087	0.654	1.687	1.174	0.88	0.654	1.134	0.681	0.596	0.524	0.889	0.76	0.863
Q15046	0.844	1.681	1.308	0.497	0.375	0.404	0.744	1.458	0.633	1.147	0.785	0.337	0.212	0.495	0.953	1.207	0.782	0.532	1.235	0.858	1.045	0.49	0.877	0.999	0.549	0.512	0.782	0.562	0.969	0.93	0.616	1.453	0.631	1.082	1.355	1.006	1.056	0.614	1.561	1.137	0.927	0.671	1.091	0.635	0.578	0.504	0.856	0.729	0.819
P33991	0.839	1.604	1.282	0.499	0.379	0.384	0.73	1.466	0.662	1.13	0.781	0.33	0.222	0.507	0.997	1.229	0.788	0.553	1.243	0.84	1.014	0.488	0.935	1.001	0.558	0.501	0.779	0.555	0.965	0.931	0.621	1.431	0.613	1.125	1.352	1.045	1.136	0.675	1.667	1.234	0.897	0.697	1.148	0.687	0.646	0.551	0.987	0.77	0.834
P31040	0.856	1.654	1.282	0.524	0.395	0.437	0.811	1.508	0.575	0.938	0.674	0.33	0.199	0.485	0.903	1.043	0.754	0.538	1.282	0.857	1.044	0.485	0.949	1.087	0.556	0.516	0.833	0.59	1.031	0.993	0.671	1.51	0.634	1.138	1.426	1.096	1.148	0.675	1.76	1.232	0.905	0.702	1.143	0.699	0.594	0.509	0.907	0.766	0.837
P15144	0.843	1.594	1.33	0.509	0.398	0.417	0.827	1.565	0.589	0.971	0.727	0.354	0.215	0.511	0.978	1.148	0.919	0.611	1.397	1.044	1.206	0.596	1.085	1.281	0.571	0.497	0.804	0.59	1.053	1.001	0.66	1.576	0.632	1.09	1.443	1.085	1.069	0.622	1.622	1.226	0.952	0.683	1.164	0.666	0.618	0.537	0.868	0.782	0.911
M0R0P8	0.839	1.526	1.174	0.519	0.445	0.466	0.726	1.454	0.506	0.869	0.595	0.343	0.208	0.445	0.775	0.985	0.76	0.569	1.236	0.828	1.03	0.49	0.895	0.985	0.562	0.5	0.767	0.584	0.957	0.929	0.616	1.417	0.633	1.126	1.368	1.023	1.159	0.662	1.762	1.138	0.862	0.669	1.09	0.646	0.594	0.502	0.879	0.727	0.822
B1AK88	0.861	1.598	1.257	0.518	0.388	0.44	0.747	1.476	0.554	0.898	0.644	0.329	0.202	0.478	0.851	1.016	0.774	0.528	1.254	0.813	1.044	0.461	0.871	1.008	0.54	0.472	0.779	0.554	0.966	0.939	0.63	1.446	0.635	1.112	1.366	1.024	1.098	0.616	1.663	1.149	0.914	0.68	1.149	0.655	0.595	0.513	0.891	0.729	0.864
P61221	0.82	1.629	1.278	0.486	0.369	0.39	0.775	1.465	0.654	1.192	0.834	0.354	0.233	0.519	1.051	1.273	0.843	0.557	1.258	0.882	1.068	0.544	0.94	1.059	0.56	0.503	0.805	0.582	1.019	0.997	0.666	1.477	0.647	1.133	1.347	1.07	1.134	0.661	1.68	1.189	0.914	0.69	1.097	0.669	0.609	0.525	0.882	0.747	0.855
P51659	0.855	1.762	1.389	0.511	0.391	0.402	0.797	1.659	0.663	1.155	0.825	0.343	0.215	0.512	0.997	1.292	0.829	0.606	1.34	0.92	1.123	0.538	0.985	1.091	0.583	0.503	0.792	0.587	1.049	0.998	0.716	1.472	0.63	1.096	1.296	1.015	1.098	0.649	1.637	1.143	0.89	0.664	1.098	0.691	0.609	0.539	0.909	0.769	0.794
P04083	0.863	1.623	1.317	0.499	0.358	0.372	0.759	1.436	0.672	1.165	0.862	0.363	0.21	0.546	1.049	1.318	0.835	0.579	1.25	0.916	1.069	0.522	0.93	1.047	0.551	0.482	0.795	0.571	0.977	0.936	0.643	1.404	0.644	1.094	1.391	1.052	1.019	0.581	1.565	1.169	0.94	0.66	1.115	0.626	0.565	0.502	0.786	0.716	0.883
P12081	0.842	1.665	1.303	0.485	0.366	0.384	0.729	1.463	0.644	1.158	0.821	0.362	0.229	0.523	0.968	1.253	0.801	0.538	1.214	0.845	1.005	0.488	0.881	1.032	0.567	0.494	0.789	0.557	0.951	0.931	0.626	1.505	0.644	1.102	1.342	1.043	1.047	0.658	1.509	1.183	0.886	0.664	1.056	0.634	0.597	0.52	0.865	0.755	0.833
K7ELL7	0.866	1.604	1.26	0.49	0.377	0.434	0.802	1.432	0.554	0.943	0.669	0.342	0.198	0.453	0.797	1.006	0.713	0.498	1.117	0.762	0.96	0.413	0.776	0.971	0.554	0.476	0.798	0.559	0.999	0.943	0.626	1.497	0.649	1.084	1.424	1.028	1.064	0.567	1.658	1.214	0.9	0.664	1.117	0.63	0.584	0.487	0.819	0.716	0.883
A0A2R8Y5S7	0.802	1.571	1.194	0.46	0.382	0.404	0.71	1.465	0.564	0.955	0.645	0.359	0.214	0.419	0.808	1.072	0.727	0.589	1.207	0.842	1.002	0.482	0.878	0.988	0.574	0.527	0.797	0.617	1.032	1.029	0.662	1.496	0.654	1.08	1.279	1.011	1.102	0.627	1.631	1.101	0.89	0.689	1.124	0.686	0.624	0.541	0.979	0.783	0.82
Q15365	0.812	1.476	1.151	0.482	0.373	0.458	0.649	1.335	0.549	0.914	0.619	0.324	0.21	0.393	0.688	0.974	0.713	0.483	1.105	0.701	0.893	0.411	0.731	0.834	0.545	0.491	0.754	0.515	0.941	0.898	0.6	1.411	0.649	1.055	1.278	0.933	1.019	0.573	1.637	1.059	0.924	0.723	1.102	0.643	0.583	0.486	0.858	0.702	0.786
Q9Y262	0.853	1.652	1.285	0.522	0.396	0.429	0.711	1.489	0.558	0.975	0.679	0.347	0.215	0.452	0.832	1.074	0.715	0.494	1.092	0.754	0.936	0.453	0.794	0.866	0.562	0.513	0.787	0.546	0.972	0.941	0.638	1.457	0.639	1.119	1.338	1.018	1.071	0.647	1.603	1.13	0.902	0.686	1.089	0.647	0.601	0.518	0.869	0.745	0.845
Q92945	0.842	1.759	1.258	0.507	0.396	0.425	0.813	1.525	0.505	0.866	0.614	0.333	0.207	0.485	0.761	0.894	0.76	0.547	1.149	0.822	1.042	0.477	0.896	1.029	0.567	0.496	0.723	0.595	1.051	0.983	0.66	1.414	0.633	0.972	1.316	1.011	1.036	0.54	1.606	1.143	0.915	0.606	1.081	0.536	0.577	0.473	0.669	0.608	0.948
O00231	0.821	1.464	1.151	0.468	0.335	0.368	0.662	1.288	0.636	1.032	0.747	0.346	0.213	0.466	0.85	1.131	0.837	0.575	1.287	0.948	1.095	0.564	0.953	1.016	0.543	0.502	0.763	0.556	0.931	0.91	0.605	1.41	0.65	1.081	1.314	1.002	1.007	0.609	1.449	1.097	0.938	0.687	1.127	0.655	0.566	0.504	0.844	0.73	0.825
P17655	0.872	1.742	1.382	0.52	0.399	0.443	0.797	1.608	0.595	1.083	0.74	0.362	0.23	0.496	0.959	1.224	0.825	0.577	1.304	0.914	1.089	0.543	0.978	1.058	0.532	0.461	0.777	0.555	0.977	0.938	0.636	1.408	0.615	1.094	1.406	1.07	1.101	0.654	1.651	1.207	0.904	0.688	1.152	0.691	0.654	0.56	0.957	0.799	0.816
P52907	0.894	1.683	1.339	0.521	0.409	0.468	0.829	1.579	0.542	0.925	0.659	0.334	0.191	0.468	0.857	1.01	0.777	0.537	1.189	0.829	1.036	0.487	0.893	1.025	0.596	0.522	0.819	0.598	1.056	1.024	0.682	1.519	0.672	1.129	1.373	1.062	1.097	0.661	1.605	1.157	0.89	0.662	1.125	0.656	0.581	0.506	0.834	0.722	0.905
P39023	0.831	1.594	1.249	0.505	0.396	0.43	0.724	1.416	0.546	0.939	0.645	0.318	0.194	0.469	0.833	1.026	0.787	0.563	1.338	0.831	1.075	0.482	0.915	1.022	0.587	0.515	0.822	0.573	1.029	0.985	0.66	1.506	0.621	1.13	1.402	1.036	1.076	0.638	1.665	1.106	0.908	0.665	1.111	0.627	0.549	0.481	0.82	0.697	0.82
P07737	0.841	1.869	1.418	0.536	0.389	0.451	0.657	1.593	0.554	0.937	0.578	0.306	0.206	0.392	0.721	0.987	0.666	0.475	1.095	0.661	0.848	0.421	0.762	0.811	0.531	0.511	0.745	0.48	0.906	0.869	0.576	1.352	0.58	1.041	1.218	0.95	1.115	0.645	1.599	1.07	0.854	0.676	1.068	0.615	0.532	0.437	0.812	0.666	0.73
Q9P258	0.773	1.528	1.181	0.468	0.378	0.422	0.808	1.387	0.589	1.007	0.717	0.337	0.208	0.488	0.911	1.105	0.737	0.535	1.235	0.811	1.014	0.485	0.889	1.009	0.557	0.494	0.809	0.579	1.015	1.014	0.658	1.469	0.602	1.111	1.367	1.035	1.137	0.651	1.661	1.196	0.885	0.665	1.127	0.649	0.575	0.509	0.863	0.754	0.845
K7EK60	0.946	1.735	1.45	0.49	0.44	0.375	0.732	2.001	0.493	0.826	0.568	0.32	0.222	0.497	0.741	0.943									0.666	0.531	0.91	0.673	1.134	1.073	0.682	1.616	0.685	1.222	1.424	1.151	1.222	0.712	1.704	1.201	0.823	0.686	1.16	0.697	0.687	0.465	0.835	0.755	0.905
Q13423	0.869	1.694	1.32	0.504	0.38	0.39	0.736	1.497	0.616	1.111	0.759	0.355	0.214	0.456	0.87	1.182	0.819	0.568	1.266	0.886	1.064	0.524	0.925	1.047	0.541	0.493	0.754	0.547	0.954	0.914	0.622	1.427	0.646	1.077	1.269	1.001	1.046	0.605	1.537	1.121	0.91	0.68	1.08	0.611	0.556	0.47	0.818	0.746	0.794
O15143	0.862	1.545	1.253	0.547	0.382	0.47	0.704	1.397	0.489	0.772	0.554	0.309	0.173	0.414	0.751	0.862	0.757	0.539	1.331	0.828	1.033	0.467	0.889	0.989	0.538	0.485	0.817	0.557	0.969	0.935	0.61	1.4	0.604	1.069	1.373	1.009	1.051	0.629	1.617	1.154	0.855	0.635	1.137	0.643	0.533	0.456	0.804	0.723	0.839
P30041	0.844	1.685	1.34	0.479	0.374	0.404	0.753	1.43	0.615	1.023	0.703	0.322	0.223	0.48	0.95	1.088	0.723	0.493	1.152	0.786	0.953	0.455	0.805	0.86	0.535	0.487	0.768	0.531	0.956	0.906	0.603	1.367	0.605	1.029	1.346	0.986	0.966	0.593	1.474	1.123	0.888	0.655	1.109	0.629	0.556	0.481	0.802	0.701	0.847
Q92888	0.855	1.6	1.255	0.525	0.42	0.469	0.71	1.474	0.519	0.875	0.628	0.33	0.203	0.462	0.753	1.006	0.743	0.549	1.184	0.817	1.024	0.483	0.896	0.967	0.588	0.52	0.827	0.597	1.054	1.053	0.703	1.523	0.669	1.161	1.376	1.096	1.177	0.699	1.715	1.219	0.885	0.685	1.096	0.64	0.597	0.52	0.856	0.737	0.858
Q15437	0.889	1.77	1.373	0.561	0.427	0.437	0.837	1.67	0.532	0.923	0.664	0.345	0.209	0.45	0.841	1.038	0.766	0.532	1.223	0.787	1.032	0.461	0.905	1.033	0.577	0.51	0.796	0.584	1.065	0.998	0.711	1.562	0.665	1.154	1.418	1.069	1.168	0.706	1.779	1.257	0.916	0.726	1.165	0.741	0.631	0.535	0.97	0.8	0.856
P09960	0.83	1.621	1.248	0.483	0.386	0.415	0.724	1.441	0.627	1.071	0.756	0.382	0.235	0.462	0.915	1.198	0.781	0.529	1.142	0.813	0.994	0.478	0.821	0.977	0.54	0.486	0.772	0.551	0.927	0.906	0.613	1.471	0.652	1.053	1.291	0.968	1.051	0.614	1.551	1.116	0.908	0.664	1.145	0.662	0.611	0.508	0.841	0.745	0.818
P31946	0.87	1.581	1.253	0.477	0.369	0.404	0.794	1.373	0.54	0.896	0.637	0.331	0.187	0.4	0.714	0.964	0.777	0.538	1.179	0.814	0.958	0.46	0.826	1.016	0.564	0.49	0.79	0.579	0.936	0.933	0.608	1.463	0.652	1.073	1.322	1.001	1.044	0.588	1.567	1.108	0.909	0.684	1.109	0.609	0.555	0.481	0.774	0.694	0.872
Q08J23	0.856	1.691	1.331	0.506	0.386	0.42	0.778	1.467	0.646	1.091	0.779	0.339	0.205	0.521	1.008	1.218	0.717	0.508	1.148	0.789	0.96	0.441	0.803	0.869	0.561	0.492	0.808	0.561	1.002	0.998	0.644	1.497	0.643	1.15	1.39	1.09	1.126	0.669	1.662	1.221	0.916	0.691	1.137	0.702	0.575	0.543	0.916	0.758	0.866
Q9NSE4	0.918	1.785	1.355	0.517	0.428	0.498	0.773	1.659	0.663	1.204	0.843	0.361	0.241	0.576	1.035	1.344	0.833	0.604	1.315	0.873	1.128	0.557	0.983	1.113	0.562	0.511	0.778	0.585	1.052	1	0.671	1.537	0.63	1.078	1.351	1.007	1.083	0.642	1.626	1.175	0.906	0.7	1.129	0.659	0.608	0.533	0.919	0.765	0.869
P21281	0.874	1.7	1.345	0.533	0.411	0.436	0.817	1.623	0.591	1.032	0.718	0.351	0.221	0.526	0.981	1.164	0.844	0.588	1.285	0.904	1.104	0.542	0.97	1.098	0.576	0.497	0.783	0.574	1.053	0.996	0.686	1.493	0.659	1.106	1.33	1.048	1.083	0.641	1.602	1.106	0.882	0.684	1.129	0.685	0.651	0.571	0.973	0.788	0.878
D6REX3	0.87	1.644	1.286	0.515	0.38	0.42	0.779	1.486	0.553	0.95	0.678	0.34	0.207	0.48	0.873	1.072	0.749	0.547	1.208	0.812	0.986	0.485	0.871	0.976	0.578	0.525	0.822	0.624	1.07	1.047	0.716	1.565	0.642	1.104	1.421	1.056	1.16	0.655	1.776	1.192	0.897	0.655	1.114	0.652	0.555	0.477	0.838	0.709	0.876
O43252	0.861	1.723	1.352	0.523	0.419	0.45	0.751	1.573	0.614	1.103	0.787	0.346	0.212	0.515	0.985	1.251	0.745	0.534	1.278	0.864	1.048	0.48	0.886	1.023	0.574	0.514	0.83	0.588	1.11	1.067	0.698	1.582	0.6	1.022	1.331	1.01	1.073	0.612	1.551	1.198	0.89	0.677	1.106	0.648	0.579	0.525	0.882	0.744	0.863
Q01082	0.9	1.82	1.384	0.546	0.432	0.467	0.82	1.734	0.537	0.874	0.61	0.315	0.197	0.429	0.756	1.014	0.751	0.575	1.211	0.83	1.113	0.519	0.947	1.058	0.562	0.513	0.745	0.553	1.022	0.969	0.682	1.507	0.647	1.108	1.33	1.061	1.157	0.653	1.694	1.191	0.915	0.716	1.153	0.667	0.632	0.561	0.975	0.821	0.864
A0A0G2JN29	0.893	1.701	1.32	0.525	0.393	0.425	0.768	1.499	0.583	0.986	0.694	0.353	0.234	0.442	0.847	1.123	0.879	0.584	1.226	0.846	1.061	0.536	0.935	1.002	0.575	0.52	0.787	0.582	0.996	0.999	0.656	1.438	0.697	1.226	1.333	1.107	1.157	0.7	1.619	1.162	0.914	0.699	1.101	0.686	0.62	0.55	0.934	0.743	0.823
P15880	0.791	1.619	1.26	0.483	0.343	0.39	0.644	1.385	0.579	1.03	0.698	0.319	0.211	0.402	0.797	1.1	0.759	0.497	1.161	0.746	0.939	0.42	0.745	0.87	0.545	0.489	0.744	0.493	0.904	0.861	0.565	1.432	0.597	1.056	1.279	0.93	0.992	0.54	1.599	1.046	0.921	0.652	1.105	0.574	0.536	0.471	0.809	0.661	0.82
P07602	0.739	1.533	1.063	0.426	0.305	0.355	0.606	1.208	0.563	1.099	0.797	0.321	0.185	0.514	0.858	1.161	0.75	0.501	1.267	0.78	0.996	0.453	0.806	0.901	0.502	0.405	0.662	0.484	0.836	0.879	0.503	1.263	0.59	0.873	1.319	0.881	0.79	0.444	1.283	1.005	0.964	0.542	0.975	0.451	0.509	0.473	0.565	0.516	0.874
Q13435	0.82	1.496	1.156	0.5	0.389	0.429	0.703	1.385	0.524	0.911	0.648	0.332	0.207	0.419	0.731	1.008	0.834	0.565	1.267	0.893	1.09	0.541	0.962	1.08	0.594	0.513	0.774	0.585	1.006	0.965	0.656	1.46	0.636	1.074	1.29	1	1.055	0.619	1.546	1.146	0.897	0.678	1.072	0.648	0.583	0.52	0.842	0.707	0.801
A0A1B0GVU9									0.635	1.326	0.909	0.511	0.301	0.648	1.22	1.4	1.354	1.025	2.453	1.585	2.107	1.073	2.107	1.9	0.712	0.701	0.901	0.928	1.42	1.461	1.079	1.846
Q06830	0.821	1.585	1.245	0.468	0.344	0.398	0.688	1.393	0.599	1.002	0.679	0.316	0.201	0.464	0.86	1.076	0.72	0.498	1.142	0.72	0.932	0.415	0.753	0.889	0.511	0.469	0.764	0.512	0.918	0.868	0.58	1.388	0.611	1.041	1.281	0.936	1.019	0.556	1.532	1.071	0.886	0.647	1.089	0.594	0.538	0.453	0.785	0.656	0.805
Q5T5C7	0.839	1.569	1.235	0.493	0.389	0.423	0.739	1.379	0.584	0.943	0.675	0.338	0.217	0.473	0.851	1.054	0.774	0.522	1.147	0.796	0.962	0.461	0.819	0.908	0.55	0.492	0.775	0.545	0.919	0.924	0.623	1.388	0.67	1.142	1.321	1.032	1.06	0.63	1.624	1.132	0.898	0.67	1.092	0.635	0.564	0.492	0.834	0.707	0.829
P07384	0.853	1.627	1.286	0.518	0.388	0.395	0.788	1.502	0.704	1.186	0.873	0.364	0.234	0.556	1.087	1.346	0.851	0.609	1.367	0.949	1.197	0.581	1.052	1.145	0.573	0.54	0.825	0.603	1.099	1.047	0.727	1.525	0.618	1.084	1.392	1.089	1.104	0.679	1.556	1.211	0.879	0.674	1.128	0.701	0.619	0.548	0.954	0.793	0.837
Q86UP2	0.838	1.559	1.219	0.521	0.42	0.446	0.78	1.483	0.607	0.983	0.71	0.349	0.209	0.455	0.938	1.108	0.878	0.618	1.363	0.936	1.177	0.572	0.995	1.166	0.525	0.486	0.78	0.6	1.003	0.975	0.663	1.453	0.645	1.103	1.446	1.084	1.151	0.615	1.738	1.243	0.877	0.63	1.128	0.629	0.576	0.463	0.814	0.679	0.855
H0Y4R1	0.877	1.711	1.326	0.531	0.404	0.428	0.747	1.542	0.565	0.955	0.656	0.329	0.207	0.426	0.793	1.024	0.789	0.557	1.215	0.855	1.023	0.492	0.873	0.976	0.572	0.511	0.782	0.581	1.01	0.953	0.648	1.465	0.653	1.114	1.337	1.024	1.14	0.655	1.666	1.167	0.903	0.703	1.138	0.683	0.587	0.493	0.907	0.764	0.804
P09972	0.905	1.807	1.412	0.547	0.412	0.432	0.88	1.634	0.628	1.109	0.768	0.387	0.226	0.552	0.98	1.128	0.97	0.693	1.447	1.151	1.311	0.675	1.137	1.329	0.579	0.522	0.805	0.621	1.088	1.013	0.704	1.56	0.643	1.111	1.42	1.128	1.124	0.636	1.631	1.237	0.865	0.657	1.118	0.664	0.615	0.509	0.881	0.769	0.879
Q16666	0.847	1.578	1.279	0.523	0.394	0.438	0.712	1.486	0.531	0.926	0.657	0.326	0.189	0.42	0.797	1.043	0.72	0.506	1.124	0.757	0.929	0.421	0.787	0.916	0.589	0.51	0.803	0.57	0.995	0.973	0.63	1.455	0.619	1.074	1.297	1.006	1.047	0.616	1.615	1.162	0.893	0.662	1.125	0.672	0.577	0.501	0.877	0.733	0.824
Q9NQW7	0.892	1.641	1.258	0.526	0.408	0.414	0.745	1.487	0.7	1.213	0.863	0.383	0.23	0.501	0.993	1.308	0.839	0.585	1.294	0.89	1.099	0.534	0.958	1.058	0.556	0.511	0.804	0.587	1.02	0.974	0.66	1.518	0.688	1.15	1.377	1.043	1.14	0.689	1.616	1.247	0.965	0.732	1.181	0.683	0.65	0.552	0.931	0.839	0.832
A0AVT1	0.86	1.696	1.322	0.535	0.43	0.443	0.768	1.578	0.655	1.138	0.794	0.377	0.226	0.56	1.028	1.245	0.897	0.617	1.371	0.972	1.197	0.609	1.051	1.144	0.595	0.52	0.813	0.603	1.01	0.995	0.683	1.469	0.72	1.134	1.387	1.072	1.105	0.649	1.647	1.177	0.953	0.693	1.132	0.652	0.625	0.523	0.863	0.762	0.814
Q9UHD8	0.858	1.636	1.268	0.54	0.426	0.45	0.791	1.554	0.54	0.908	0.655	0.344	0.219	0.467	0.827	1.036	0.777	0.562	1.265	0.847	1.045	0.487	0.957	1.051	0.577	0.515	0.799	0.587	1.047	1.027	0.695	1.509	0.631	1.135	1.35	1.048	1.203	0.657	1.846	1.152	0.889	0.673	1.137	0.681	0.615	0.532	0.917	0.741	0.809
C9J406
P62136	0.865	1.75	1.37	0.501	0.358	0.391	0.743	1.567	0.689	1.221	0.88	0.335	0.212	0.533	1.083	1.336	0.833	0.57	1.313	0.925	1.126	0.543	0.966	1.096	0.549	0.485	0.785	0.579	0.962	0.944	0.645	1.464	0.632	1.078	1.37	1.073	1.074	0.625	1.545	1.159	0.91	0.636	1.137	0.658	0.574	0.509	0.836	0.709	0.857
P35998	0.847	1.639	1.285	0.486	0.387	0.438	0.813	1.484	0.563	1.002	0.725	0.343	0.208	0.483	0.891	1.1	0.782	0.518	1.196	0.825	1.039	0.479	0.856	1.025	0.558	0.481	0.793	0.549	1.004	0.95	0.624	1.518	0.645	1.081	1.312	1.019	1.108	0.627	1.605	1.177	0.869	0.667	1.118	0.629	0.6	0.524	0.887	0.769	0.867
Q02790	0.834	1.621	1.263	0.507	0.382	0.447	0.741	1.467	0.526	0.892	0.624	0.323	0.19	0.433	0.778	0.982	0.728	0.498	1.175	0.785	0.97	0.43	0.787	0.901	0.537	0.482	0.778	0.538	0.938	0.911	0.604	1.422	0.627	1.056	1.344	0.976	1.031	0.592	1.573	1.111	0.893	0.684	1.14	0.643	0.561	0.484	0.844	0.724	0.814
P49321	0.859	1.627	1.283	0.506	0.386	0.433	0.784	1.516	0.561	0.952	0.669	0.335	0.193	0.466	0.849	1.038	0.756	0.52	1.19	0.818	0.988	0.443	0.824	1.016	0.554	0.465	0.773	0.577	0.982	0.949	0.622	1.436	0.639	1.123	1.446	1.066	1.049	0.586	1.642	1.189	0.9	0.667	1.113	0.628	0.556	0.474	0.787	0.703	0.888
P50995	0.839	1.563	1.221	0.503	0.385	0.429	0.74	1.434	0.565	0.931	0.667	0.346	0.223	0.482	0.823	1.037	0.756	0.529	1.15	0.818	0.992	0.47	0.848	0.939	0.56	0.5	0.784	0.554	0.956	0.945	0.627	1.445	0.671	1.117	1.369	1.051	1.118	0.621	1.716	1.183	0.888	0.673	1.113	0.632	0.572	0.5	0.841	0.703	0.849
O75165	0.882	1.716	1.282	0.528	0.422	0.414	0.797	1.567	0.647	1.091	0.815	0.388	0.263	0.481	1.005	1.224	0.95	0.646	1.301	0.954	1.187	0.654	1.01	1.148	0.603	0.531	0.824	0.612	1.05	1.062	0.657	1.598	0.741	1.279	1.395	1.118	1.251	0.741	1.636	1.355	0.935	0.683	1.097	0.65	0.593	0.54	0.795	0.731	0.842
P36222	0.861	1.61	1.283	0.516	0.396	0.441	0.765	1.487	0.569	0.963	0.665	0.347	0.21	0.439	0.841	1.052	0.765	0.539	1.186	0.817	0.998	0.479	0.869	0.944	0.558	0.499	0.759	0.544	0.974	0.932	0.638	1.435	0.653	1.127	1.355	1.026	1.055	0.618	1.635	1.124	0.891	0.668	1.133	0.674	0.595	0.526	0.926	0.75	0.815
P35232	0.884	1.607	1.276	0.515	0.39	0.423	0.709	1.46	0.59	0.985	0.703	0.351	0.216	0.448	0.78	1.067	0.79	0.52	1.184	0.81	0.992	0.49	0.85	0.945	0.56	0.492	0.778	0.551	0.956	0.946	0.617	1.421	0.654	1.103	1.306	1.014	1.062	0.611	1.597	1.144	0.916	0.662	1.125	0.652	0.58	0.517	0.85	0.73	0.84
Q9Y265	0.859	1.711	1.298	0.505	0.383	0.425	0.731	1.482	0.664	1.169	0.789	0.356	0.229	0.454	0.999	1.272	0.815	0.563	1.261	0.881	1.08	0.519	0.916	1.021	0.572	0.526	0.805	0.56	1	0.964	0.667	1.507	0.632	1.07	1.325	1.008	1.068	0.662	1.533	1.157	0.9	0.674	1.108	0.639	0.57	0.49	0.861	0.72	0.798
O00116	0.908	1.78	1.401	0.552	0.423	0.459	0.827	1.625	0.625	1.069	0.779	0.367	0.214	0.497	0.992	1.187	0.737	0.532	1.216	0.85	1.03	0.495	0.876	1.027	0.595	0.518	0.83	0.62	1.066	1.038	0.715	1.596	0.629	1.123	1.383	1.053	1.151	0.645	1.712	1.212	0.872	0.676	1.146	0.668	0.607	0.521	0.904	0.786	0.856
H0Y5F5	0.814	1.51	1.203	0.471	0.38	0.414	0.758	1.383	0.459	0.723	0.548	0.29	0.183	0.451	0.693	0.85	0.751	0.595	1.266	0.807	0.985	0.477	1.001	0.969	0.582	0.538	0.81	0.628	1.156	1.214	0.81	1.559	0.678	1.252	1.533	1.151	1.341	0.733	1.951	1.181	0.896	0.652	1.104	0.686	0.604	0.569	0.978	0.715	0.873
M0QZM1	0.844	1.541	1.184	0.507	0.475	0.471	0.647	1.411	0.405	0.579	0.419	0.367	0.208	0.272	0.513	0.674	1.083	0.68	1.56	1.155	1.408	0.757	1.846	1.808	0.631	0.535	0.741	0.577	0.949	1.032	0.662	1.359	0.825	1.188	1.154	0.961	1.139	0.785	1.839	1.068	0.961	0.834	1.118	0.727	0.604	0.497	1.059	0.814	0.814
Q14669	0.871	1.651	1.254	0.536	0.408	0.403	0.712	1.492	0.697	1.245	0.897	0.378	0.23	0.593	1.13	1.406	0.802	0.561	1.278	0.862	1.054	0.519	0.883	0.979	0.577	0.532	0.816	0.615	1.037	1.014	0.699	1.47	0.619	1.103	1.405	1.067	1.086	0.643	1.547	1.179	0.913	0.704	1.11	0.673	0.605	0.558	0.887	0.773	0.863
Q9BXP5	0.826	1.528	1.191	0.505	0.425	0.47	0.798	1.414	0.536	0.906	0.627	0.336	0.198	0.446	0.822	1.005	0.679	0.48	1.089	0.718	0.889	0.397	0.772	0.883	0.571	0.476	0.789	0.557	0.987	0.979	0.667	1.476	0.613	1.098	1.357	1.036	1.083	0.579	1.645	1.114	0.908	0.662	1.152	0.64	0.592	0.501	0.864	0.709	0.89
Q7L1Q6	0.867	1.564	1.218	0.52	0.405	0.447	0.789	1.427	0.609	0.995	0.71	0.35	0.217	0.472	0.885	1.072	0.814	0.537	1.22	0.882	1.087	0.467	0.867	1.029	0.559	0.484	0.801	0.563	0.962	0.935	0.622	1.443	0.644	1.109	1.385	1.036	1.026	0.583	1.617	1.153	0.935	0.666	1.137	0.583	0.564	0.473	0.797	0.686	0.87
P26641	0.847	1.645	1.313	0.485	0.374	0.418	0.743	1.478	0.569	0.982	0.709	0.342	0.205	0.44	0.823	1.095	0.77	0.519	1.18	0.784	0.975	0.466	0.816	0.95	0.541	0.478	0.77	0.535	0.905	0.889	0.603	1.397	0.623	1.107	1.315	1.01	1.026	0.607	1.53	1.127	0.884	0.646	1.079	0.638	0.573	0.497	0.856	0.734	0.815
Q9Y3F4	0.871	1.695	1.352	0.545	0.411	0.47	0.829	1.543	0.563	0.977	0.675	0.336	0.204	0.529	0.869	1.076	0.797	0.561	1.241	0.847	1.052	0.502	0.877	1.03	0.565	0.491	0.803	0.565	1.024	0.943	0.635	1.509	0.653	1.095	1.38	1.047	1.064	0.634	1.564	1.215	0.898	0.656	1.111	0.661	0.57	0.507	0.846	0.749	0.853
P78347	0.842	1.691	1.307	0.52	0.405	0.423	0.804	1.568	0.675	1.214	0.86	0.361	0.233	0.523	1.026	1.34	0.783	0.546	1.217	0.831	1.02	0.487	0.88	1.024	0.553	0.501	0.776	0.546	0.987	0.962	0.637	1.471	0.643	1.126	1.393	1.05	1.155	0.656	1.706	1.254	0.9	0.671	1.114	0.638	0.583	0.514	0.863	0.715	0.815
F8W6I7	0.74	1.409	1.064	0.516	0.413	0.55	0.693	1.287	0.326	0.471	0.317	0.23	0.143	0.376	0.505	0.526	0.754	0.532	1.235	0.775	0.979	0.447	0.852	0.733	0.579	0.467	0.834	0.547	0.969	0.961	0.632	1.28	0.612	1.115	1.38	1.06	1.079	0.649	1.684	1	0.965	0.632	1.156	0.695	0.484	0.462	0.811	0.587	0.903
P62195	0.874	1.714	1.341	0.508	0.397	0.445	0.766	1.613	0.566	1.004	0.712	0.344	0.208	0.45	0.838	1.085	0.805	0.535	1.257	0.888	1.032	0.494	0.869	1.042	0.561	0.498	0.782	0.551	0.959	0.931	0.634	1.489	0.661	1.101	1.37	1.022	1.056	0.625	1.63	1.155	0.893	0.636	1.087	0.631	0.546	0.482	0.848	0.712	0.808
Q9Y230	0.862	1.742	1.363	0.496	0.374	0.4	0.75	1.535	0.672	1.224	0.853	0.345	0.219	0.528	1.038	1.314	0.849	0.569	1.325	0.922	1.154	0.549	0.963	1.143	0.55	0.494	0.789	0.567	0.994	0.952	0.648	1.482	0.641	1.133	1.351	1.028	1.073	0.646	1.624	1.195	0.885	0.65	1.086	0.631	0.562	0.492	0.855	0.736	0.836
P33993	0.87	1.693	1.324	0.528	0.406	0.434	0.782	1.532	0.652	1.141	0.799	0.337	0.211	0.569	1.01	1.254	0.838	0.586	1.298	0.888	1.095	0.553	0.98	1.071	0.583	0.51	0.824	0.569	1.035	1.01	0.678	1.49	0.64	1.143	1.408	1.079	1.125	0.668	1.748	1.208	0.929	0.666	1.14	0.665	0.618	0.552	0.927	0.765	0.862
P36578	0.84	1.744	1.361	0.491	0.381	0.417	0.731	1.55	0.61	1.096	0.761	0.337	0.219	0.47	0.908	1.192	0.776	0.527	1.231	0.774	1.041	0.449	0.831	1.006	0.547	0.492	0.765	0.528	0.961	0.921	0.602	1.507	0.614	1.069	1.352	0.996	1.009	0.597	1.51	1.129	0.9	0.646	1.106	0.632	0.542	0.494	0.833	0.737	0.795
Q9Y696	0.925	1.731	1.324	0.579	0.45	0.488	0.76	1.547	0.569	0.982	0.711	0.358	0.197	0.49	0.811	1.053	0.79	0.549	1.293	0.884	1.037	0.471	0.906	1.066	0.559	0.518	0.804	0.572	1.028	1.017	0.669	1.477	0.624	1.088	1.371	1.037	1.07	0.6	1.714	1.161	0.944	0.674	1.219	0.683	0.656	0.567	0.935	0.751	0.916
P19367	0.913	1.685	1.379	0.526	0.384	0.389	0.791	1.539	0.553	0.995	0.695	0.348	0.219	0.439	0.898	1.084	1.114	0.708	1.636	1.225	1.432	0.754	1.312	1.376	0.604	0.535	0.819	0.625	1.096	1.077	0.738	1.63	0.658	1.125	1.333	1.053	1.094	0.65	1.634	1.162	0.919	0.691	1.1	0.678	0.606	0.513	0.898	0.759	0.842
Q9UQ80	0.844	1.643	1.285	0.482	0.363	0.418	0.735	1.494	0.584	1.034	0.711	0.329	0.191	0.465	0.855	1.102	0.791	0.524	1.222	0.83	1.009	0.454	0.828	0.994	0.55	0.471	0.788	0.552	0.941	0.92	0.59	1.435	0.658	1.11	1.39	1.044	1.045	0.609	1.574	1.161	0.928	0.667	1.125	0.619	0.544	0.476	0.809	0.694	0.868
P35908	0.599	0.979	0.681	0.282	0.253	0.258	0.444	1.944	0.703	0.994	0.867	0.419	0.483	0.882	0.651	1.068	0.853	0.507	1.375	1.081	3.4	0.775	1.057	1.46	0.72	0.768	2.353	0.6	1.666	1.055	0.945	1.573	0.6	0.792	0.908	1.327	0.963	0.465	1.545	1.187	1.023	0.732	1.067	0.783	0.634	0.845	5.241	0.902	0.924
P62937	0.804	1.8	1.38	0.539	0.338	0.383	0.593	1.497	0.639	1.03	0.565	0.31	0.205	0.382	0.72	1.041	0.613	0.451	1.104	0.589	0.76	0.323	0.665	0.79	0.525	0.553	0.727	0.438	0.847	0.78	0.548	1.344	0.568	1.03	1.266	0.973	1.045	0.662	1.65	1.043	0.868	0.705	1.112	0.712	0.554	0.448	0.957	0.712	0.685
P09525	0.858	1.632	1.3	0.487	0.389	0.424	0.789	1.478	0.606	1.059	0.767	0.342	0.21	0.567	0.97	1.168	0.797	0.548	1.204	0.852	1.023	0.498	0.898	0.987	0.557	0.465	0.78	0.553	0.957	0.929	0.625	1.409	0.652	1.124	1.424	1.093	1.105	0.65	1.676	1.23	0.92	0.664	1.151	0.671	0.629	0.57	0.923	0.765	0.893
Q9HAV4	0.853	1.64	1.311	0.505	0.376	0.415	0.781	1.504	0.64	1.078	0.76	0.366	0.236	0.481	0.972	1.2	0.945	0.649	1.382	1.043	1.255	0.664	1.092	1.281	0.538	0.494	0.791	0.55	0.943	0.917	0.666	1.432	0.69	1.149	1.39	1.113	1.106	0.698	1.556	1.337	0.907	0.661	1.097	0.667	0.613	0.553	0.856	0.776	0.784
E9PB90	0.82	1.513	1.161	0.502	0.415	0.44	0.735	1.42	0.707	1.212	0.858	0.39	0.284	0.575	1.087	1.31	0.799	0.581	1.215	0.857	1.027	0.496	0.857	1.018	0.582	0.536	0.805	0.573	0.972	0.96	0.684	1.519	0.67	1.148	1.359	1.048	1.125	0.669	1.621	1.2	0.889	0.682	1.067	0.663	0.617	0.525	0.899	0.792	0.85
P20702	0.861	1.631	1.276	0.531	0.409	0.393	0.753	1.506	0.62	1.019	0.731	0.337	0.247	0.45	0.871	1.072	0.864	0.605	1.303	0.925	1.113	0.557	0.98	1.033	0.552	0.493	0.748	0.541	0.978	0.921	0.626	1.379	0.689	1.1	1.305	1.034	1.096	0.635	1.533	1.093	0.891	0.68	1.127	0.67	0.624	0.54	0.894	0.748	0.814
O95573	0.842	1.638	1.303	0.542	0.441	0.484	0.744	1.51	0.591	0.975	0.707	0.354	0.225	0.52	0.918	1.101	0.797	0.574	1.321	0.825	1.067	0.514	0.948	1.001	0.576	0.51	0.776	0.592	1.04	1.006	0.701	1.529	0.634	1.211	1.421	1.107	1.316	0.715	1.927	1.205	0.878	0.671	1.141	0.697	0.631	0.536	0.941	0.766	0.838
F8VZX2	0.941	1.752	1.34	0.566	0.526	0.532	0.868	1.649	0.408	0.654	0.513	0.391	0.194	0.352	0.641	0.802	0.688	0.618	1.099	0.824	1.35	0.589	0.933	1.191									0.591	1.098	1.643	1.177	1.205	0.663	1.619	1.294	0.883	0.678	1.065	0.686	0.655	0.559	1	0.826
Q9H4M9	0.887	1.771	1.341	0.491	0.39	0.444	0.791	1.581	0.673	1.267	0.947	0.368	0.238	0.758	1.112	1.384	0.829	0.556	1.271	0.918	1.124	0.527	0.951	1.123	0.56	0.513	0.778	0.618	1.051	0.998	0.698	1.571	0.683	1.003	1.339	1.057	0.988	0.595	1.491	1.228	0.945	0.664	1.128	0.615	0.632	0.548	0.868	0.751	0.928
F5GZS6	0.85	1.573	1.24	0.493	0.39	0.412	0.738	1.437	0.573	1.019	0.752	0.332	0.206	0.496	0.935	1.128	0.837	0.547	1.199	0.863	1.034	0.517	0.895	0.964	0.558	0.488	0.783	0.546	0.932	0.904	0.604	1.38	0.664	1.135	1.402	1.058	1.084	0.589	1.68	1.217	0.96	0.642	1.157	0.609	0.59	0.524	0.79	0.707	0.969
P05198	0.855	1.652	1.309	0.501	0.39	0.425	0.745	1.523	0.635	1.11	0.798	0.36	0.223	0.485	0.936	1.246	0.809	0.562	1.307	0.851	1.074	0.506	0.935	1.09	0.587	0.509	0.816	0.61	1.07	1.01	0.695	1.53	0.673	1.126	1.339	1.048	1.156	0.659	1.697	1.167	0.898	0.665	1.13	0.677	0.605	0.529	0.918	0.756	0.812
P12109	0.843	1.628	1.303	0.486	0.371	0.379	0.732	1.494	0.602	1.079	0.771	0.339	0.214	0.476	0.96	1.197	0.752	0.542	1.234	0.823	1.008	0.474	0.858	0.962	0.52	0.464	0.774	0.53	0.914	0.876	0.59	1.404	0.61	1.069	1.319	1	1.051	0.589	1.588	1.104	0.915	0.655	1.1	0.615	0.564	0.501	0.868	0.727	0.836
P09104	0.802	1.592	1.272	0.43	0.366	0.304	0.786	1.42	0.685	1.097	0.766	0.372	0.243	0.482	0.969	1.231	0.842	0.617	1.27	0.966	1.159	0.581	1.08	1.106	0.572	0.506	0.755	0.563	1.047	0.942	0.678	1.462	0.659	1.1	1.3	1.027	1.125	0.642	1.576	1.175	0.861	0.668	1.135	0.693	0.611	0.55	0.95	0.765	0.794
Q15459	0.864	1.698	1.318	0.521	0.399	0.443	0.784	1.569	0.58	1.003	0.718	0.345	0.199	0.449	0.851	1.115	0.836	0.576	1.261	0.89	1.096	0.522	0.95	1.09	0.576	0.496	0.765	0.576	0.998	0.974	0.644	1.466	0.648	1.091	1.34	0.994	1.057	0.617	1.581	1.151	0.909	0.669	1.092	0.63	0.577	0.505	0.843	0.712	0.854
O75874	0.886	1.659	1.327	0.539	0.42	0.454	0.765	1.537	0.564	0.996	0.712	0.337	0.204	0.445	0.855	1.093	0.766	0.548	1.213	0.83	1.029	0.478	0.885	0.985	0.545	0.468	0.78	0.565	0.979	0.931	0.641	1.42	0.599	1.056	1.324	0.976	1.062	0.603	1.529	1.181	0.918	0.658	1.16	0.641	0.606	0.515	0.879	0.733	0.835
Q04446	0.869	1.805	1.41	0.541	0.402	0.452	0.786	1.639	0.599	1.058	0.719	0.345	0.205	0.482	0.919	1.122	0.745	0.53	1.196	0.799	0.988	0.464	0.851	0.971	0.559	0.482	0.788	0.564	0.997	0.958	0.659	1.494	0.619	1.087	1.34	1.032	1.095	0.61	1.614	1.137	0.87	0.661	1.12	0.638	0.581	0.5	0.848	0.736	0.843
Q99536	0.858	1.686	1.34	0.507	0.376	0.401	0.772	1.515	0.681	1.16	0.824	0.359	0.227	0.522	0.99	1.23	0.789	0.526	1.214	0.862	1.027	0.475	0.841	0.996	0.559	0.526	0.803	0.549	0.996	0.926	0.625	1.479	0.672	1.117	1.376	1.008	1.06	0.634	1.662	1.158	0.929	0.696	1.148	0.67	0.58	0.504	0.898	0.73	0.845
P27695	0.837	1.541	1.209	0.477	0.36	0.407	0.778	1.398	0.587	0.976	0.706	0.354	0.2	0.535	0.931	1.057	0.778	0.514	1.201	0.83	1.024	0.461	0.839	1.002	0.551	0.468	0.784	0.551	0.998	0.963	0.625	1.505	0.624	1.088	1.406	1.063	1.056	0.57	1.641	1.197	0.887	0.631	1.123	0.584	0.567	0.471	0.772	0.706	0.896
P62873	0.822	1.495	1.202	0.482	0.356	0.424	0.666	1.254	0.502	0.824	0.576	0.303	0.188	0.391	0.691	0.866	0.725	0.535	1.168	0.791	0.939	0.453	0.814	0.881	0.535	0.496	0.786	0.546	0.91	0.89	0.585	1.405	0.661	1.061	1.335	0.98	1.011	0.595	1.532	1.104	0.897	0.667	1.095	0.629	0.543	0.479	0.774	0.742	0.854
P30520	0.839	1.64	1.279	0.504	0.362	0.408	0.754	1.507	0.636	1.084	0.77	0.355	0.229	0.519	1.004	1.223	0.763	0.526	1.166	0.807	0.98	0.478	0.827	0.987	0.577	0.532	0.814	0.573	1.007	0.97	0.644	1.58	0.644	1.087	1.321	1.02	1.051	0.638	1.549	1.171	0.926	0.704	1.109	0.657	0.613	0.536	0.863	0.778	0.86
O43592	0.829	1.604	1.254	0.502	0.398	0.482	0.742	1.491	0.706	1.236	0.879	0.364	0.263	0.535	1.147	1.375	0.939	0.596	1.373	1.017	1.093	0.582	0.945	1.131	0.579	0.489	0.799	0.593	0.972	0.96	0.669	1.534	0.657	1.046	1.345	1.009	1.009	0.612	1.501	1.097	0.928	0.624	1.073	0.605	0.554	0.532	0.784	0.731	0.815
Q92499	0.838	1.675	1.308	0.525	0.403	0.444	0.766	1.54	0.557	0.933	0.663	0.333	0.196	0.441	0.82	1.05	0.764	0.531	1.206	0.808	1.045	0.486	0.9	0.988	0.559	0.539	0.791	0.572	1.033	0.978	0.684	1.539	0.617	1.116	1.295	1.004	1.153	0.658	1.726	1.152	0.891	0.677	1.139	0.66	0.599	0.53	0.917	0.749	0.842
P31943	0.843	1.667	1.265	0.497	0.37	0.421	0.699	1.458	0.559	0.975	0.622	0.314	0.203	0.459	0.825	1.045	0.768	0.571	1.286	0.811	1.072	0.49	0.923	1.038	0.565	0.503	0.816	0.526	0.972	0.907	0.629	1.486	0.605	1.097	1.34	1.011	1.063	0.619	1.674	1.113	0.923	0.694	1.132	0.686	0.574	0.504	0.886	0.737	0.826
E7EX90	0.831	1.589	1.248	0.496	0.405	0.444	0.775	1.461	0.597	1.084	0.791	0.387	0.221	0.514	0.906	1.24	0.718	0.506	1.121	0.779	0.989	0.44	0.855	0.953	0.562	0.513	0.839	0.529	0.92	0.936	0.592	1.432	0.636	1.174	1.365	1.042	1.209	0.658	1.843	1.164	0.891	0.702	1.082	0.667	0.648	0.558	0.885	0.773	0.846
P27348	0.837	1.575	1.225	0.495	0.358	0.436	0.747	1.377	0.545	0.933	0.656	0.308	0.184	0.446	0.812	0.983	0.799	0.528	1.185	0.839	0.965	0.462	0.819	0.958	0.538	0.465	0.781	0.545	0.934	0.913	0.602	1.411	0.64	1.057	1.383	0.992	0.974	0.565	1.498	1.117	0.905	0.667	1.104	0.601	0.54	0.462	0.778	0.665	0.85
P51991	0.796	1.53	1.151	0.547	0.428	0.473	0.682	1.415	0.4	0.621	0.423	0.254	0.152	0.377	0.571	0.667	0.701	0.535	1.234	0.728	1.011	0.446	0.897	0.806	0.594	0.504	0.831	0.557	1.044	1.022	0.694	1.405	0.621	1.133	1.41	1.123	1.147	0.653	1.752	1.024	0.913	0.676	1.116	0.72	0.556	0.495	0.928	0.661	0.843
O43776	0.852	1.657	1.271	0.504	0.379	0.465	0.723	1.474	0.596	1.044	0.749	0.36	0.212	0.458	0.866	1.148	0.749	0.513	1.148	0.808	0.974	0.455	0.802	0.938	0.557	0.502	0.777	0.558	0.94	0.922	0.626	1.454	0.64	1.099	1.325	1.024	1.039	0.597	1.6	1.14	0.896	0.657	1.072	0.641	0.564	0.472	0.787	0.722	0.825
P46063	0.862	1.765	1.361	0.532	0.421	0.418	0.779	1.665	0.573	0.973	0.675	0.328	0.202	0.491	0.951	1.108	0.843	0.613	1.434	0.898	1.21	0.539	1.055	1.146	0.56	0.508	0.792	0.585	1.052	1.022	0.698	1.518	0.633	1.16	1.458	1.094	1.2	0.643	1.804	1.259	0.912	0.693	1.158	0.714	0.643	0.562	0.988	0.791	0.847
Q5SW79	0.817	1.332	1.033	0.495	0.429	0.451	0.664	1.255	0.486	0.688	0.551	0.342	0.199	0.429	0.611	0.809	0.748	0.567	1.199	0.92	1.069	0.469	0.863	0.904	0.555	0.493	0.796	0.688	1.132	1.064	0.707	1.426	0.666	1.136	1.315	0.985	1.182	0.627	1.742	1.129	0.863	0.717	1.189	0.635	0.605	0.556	0.878	0.733	0.88
P62495	0.861	1.686	1.343	0.519	0.381	0.39	0.736	1.451	0.611	1.073	0.722	0.317	0.204	0.467	0.957	1.129	0.786	0.542	1.203	0.822	1.023	0.493	0.867	0.957	0.586	0.514	0.785	0.588	1.023	0.975	0.646	1.473	0.639	1.11	1.309	0.989	1.061	0.639	1.56	1.128	0.895	0.684	1.101	0.645	0.577	0.486	0.84	0.719	0.86
P54819	0.818	1.575	1.017	0.51	0.351	0.374	0.71	1.246	0.555	0.936	0.662	0.386	0.206	0.537	0.681	0.857	0.655	0.516	1.048	0.799	0.916	0.417	0.759	0.831	0.578	0.496	0.652	0.565	0.965	0.948	0.564	1.188	0.677	0.965	1.273	0.944	0.883	0.543	1.428	1.018	0.951	0.736	1.116	0.644	0.599	0.517	0.813	0.727	0.849
Q92614	0.83	1.581	1.249	0.505	0.371	0.42	0.7	1.442	0.522	0.863	0.603	0.35	0.217	0.392	0.732	0.972	0.839	0.571	1.3	0.892	1.128	0.564	0.984	1.121	0.555	0.513	0.77	0.567	1.016	0.967	0.679	1.438	0.633	1.114	1.291	1.038	1.071	0.645	1.64	1.163	0.936	0.68	1.104	0.691	0.584	0.539	0.913	0.763	0.808
O75390	0.842	1.643	1.249	0.483	0.366	0.438	0.776	1.51	0.591	1.004	0.702	0.336	0.227	0.462	0.843	1.078	0.791	0.507	1.213	0.821	1.005	0.471	0.797	1.008	0.552	0.484	0.802	0.546	0.975	0.943	0.63	1.457	0.642	1.043	1.328	0.979	0.964	0.549	1.449	1.141	0.928	0.631	1.133	0.598	0.554	0.505	0.797	0.729	0.875
Q13838	0.854	1.761	1.366	0.479	0.36	0.413	0.76	1.583	0.681	1.239	0.841	0.352	0.233	0.552	1.032	1.355	0.806	0.527	1.287	0.876	1.054	0.488	0.876	1.057	0.566	0.485	0.818	0.559	0.967	0.937	0.627	1.477	0.608	1.12	1.409	1.054	1.073	0.633	1.494	1.128	0.903	0.66	1.075	0.649	0.58	0.501	0.805	0.711	0.869
O00754	0.885	1.658	1.283	0.544	0.403	0.413	0.796	1.534	0.639	1.103	0.768	0.362	0.236	0.525	0.977	1.196	0.875	0.621	1.334	0.93	1.159	0.596	0.989	1.148	0.55	0.497	0.797	0.58	0.998	0.996	0.66	1.497	0.666	1.098	1.354	1.048	1.157	0.64	1.638	1.277	0.913	0.671	1.126	0.645	0.643	0.537	0.9	0.76	0.904
Q15942	0.863	1.472	1.018	0.502	0.414	0.47	0.782	1.338	0.424	0.678	0.504	0.337	0.177	0.426	0.598	0.684	0.785	0.598	1.182	0.847	1.098	0.473	0.919	1.005	0.567	0.458	0.705	0.611	1.092	1.049	0.659	1.351	0.695	1.032	1.418	1	1.063	0.558	1.809	1.183	0.97	0.7	1.165	0.628	0.657	0.56	0.885	0.659	0.979
P20700	0.795	1.566	1.278	0.479	0.375	0.405	0.649	1.384	0.527	0.984	0.734	0.297	0.196	0.449	0.718	1.006	0.708	0.47	1.229	0.746	0.951	0.482	0.755	0.995	0.554	0.464	0.915	0.527	0.892	0.96	0.64	1.333	0.391	0.695	1.087	0.638	0.955	0.52	1.214	1.009	0.592	0.472	0.954	0.423	0.56	0.434	0.8	0.697	0.52
Q12931	0.844	1.745	1.413	0.534	0.379	0.375	0.779	1.599	0.614	1.057	0.755	0.357	0.224	0.506	0.949	1.192	0.843	0.594	1.308	0.904	1.123	0.566	0.971	1.057	0.57	0.512	0.821	0.59	1.062	1.002	0.704	1.53	0.646	1.117	1.364	1.055	1.093	0.645	1.615	1.217	0.921	0.694	1.127	0.713	0.633	0.548	0.965	0.772	0.826
Q9UQ35	0.818	1.464	1.07	0.511	0.415	0.443	0.647	1.27	0.428	0.699	0.481	0.3	0.186	0.359	0.669	0.76	0.71	0.544	1.164	0.762	0.953	0.449	0.864	0.89	0.553	0.487	0.825	0.581	1.013	1.022	0.661	1.458	0.559	1.11	1.316	0.989	1.162	0.612	1.898	1.08	0.835	0.64	1.05	0.57	0.54	0.503	0.83	0.691	0.782
O75844	0.838	1.581	1.263	0.515	0.378	0.414	0.704	1.399	0.585	0.983	0.65	0.323	0.209	0.404	0.813	1.064	0.738	0.515	1.175	0.739	0.955	0.442	0.791	0.868	0.543	0.494	0.765	0.516	0.949	0.922	0.613	1.405	0.643	1.11	1.307	0.976	1.092	0.64	1.668	1.139	0.886	0.676	1.096	0.655	0.554	0.46	0.852	0.71	0.803
Q15366	0.865	1.677	1.268	0.539	0.415	0.478	0.7	1.492	0.564	0.94	0.65	0.329	0.213	0.385	0.737	1.028	0.747	0.48	1.127	0.766	0.915	0.443	0.759	0.834	0.532	0.492	0.772	0.527	0.919	0.887	0.579	1.397	0.638	1.08	1.29	0.966	1.004	0.605	1.479	1.063	0.917	0.667	1.066	0.609	0.551	0.469	0.767	0.679	0.855
P37837	0.901	1.748	1.375	0.494	0.348	0.379	0.752	1.522	0.684	1.253	0.872	0.361	0.218	0.541	1.038	1.332	0.835	0.554	1.295	0.894	1.116	0.493	0.894	1.121	0.532	0.464	0.777	0.534	0.936	0.895	0.578	1.439	0.653	1.097	1.388	1.021	1.015	0.586	1.523	1.198	0.907	0.643	1.131	0.596	0.55	0.482	0.788	0.716	0.874
P52306	0.889	1.776	1.348	0.551	0.365	0.424	0.763	1.537	0.638	1.118	0.809	0.364	0.22	0.545	0.936	1.223	0.874	0.596	1.326	1.002	1.183	0.635	1.018	1.148	0.543	0.52	0.818	0.579	0.98	0.999	0.633	1.492	0.647	1.083	1.42	1.046	1.028	0.6	1.453	1.217	0.898	0.653	1.113	0.634	0.576	0.525	0.781	0.767	0.875
Q99623	0.844	1.675	1.329	0.492	0.392	0.422	0.795	1.508	0.576	0.985	0.689	0.332	0.208	0.477	0.831	1.094	0.774	0.53	1.199	0.8	0.994	0.473	0.866	0.946	0.559	0.499	0.787	0.552	0.986	0.951	0.646	1.44	0.637	1.117	1.298	0.997	1.121	0.643	1.691	1.126	0.888	0.674	1.09	0.654	0.586	0.493	0.867	0.726	0.831
P13674	0.868	1.698	1.349	0.498	0.401	0.414	0.791	1.536	0.591	1.094	0.737	0.344	0.213	0.485	0.946	1.162	0.759	0.537	1.193	0.867	0.993	0.466	0.917	0.934	0.555	0.499	0.79	0.558	0.973	0.936	0.663	1.485	0.623	1.12	1.396	1.064	1.111	0.621	1.589	1.134	0.876	0.674	1.118	0.66	0.598	0.516	0.865	0.755	0.828
P05556	0.899	1.601	1.301	0.515	0.384	0.422	0.792	1.452	0.53	0.88	0.647	0.33	0.182	0.401	0.757	0.972	0.809	0.512	1.161	0.808	0.997	0.456	0.799	0.968	0.549	0.47	0.782	0.571	1.016	0.958	0.643	1.422	0.629	1.078	1.362	1.023	1.024	0.539	1.605	1.138	0.909	0.63	1.104	0.566	0.538	0.479	0.763	0.662	0.884
H0YIV4	0.876	1.679	1.382	0.492	0.388	0.46	0.867	1.607	0.624	1.132	0.801	0.383	0.225	0.544	0.942	1.209	0.714	0.465	1.067	0.771	0.888	0.417	0.679	0.823	0.541	0.475	0.775	0.513	0.917	0.834	0.559	1.397	0.591	1.053	1.339	0.992	0.925	0.546	1.395	1.115	0.887	0.622	1.167	0.63	0.575	0.491	0.799	0.729	0.891
P23246	0.793	1.594	1.206	0.473	0.388	0.407	0.735	1.43	0.499	0.896	0.609	0.322	0.187	0.434	0.757	0.991	0.711	0.499	1.165	0.78	0.942	0.432	0.821	0.954	0.58	0.498	0.809	0.578	1.021	1.003	0.673	1.558	0.519	1.021	1.371	0.896	0.964	0.57	1.557	1.008	0.814	0.658	1.19	0.588	0.549	0.557	0.877	0.693	0.761
Q9Y613	0.867	1.652	1.24	0.531	0.43	0.466	0.758	1.547	0.612	1.095	0.834	0.367	0.225	0.488	0.932	1.219	0.79	0.59	1.216	0.869	1.05	0.487	0.919	1.049	0.604	0.513	0.844	0.63	1.145	1.118	0.727	1.624	0.623	1.112	1.369	1.092	1.189	0.661	1.728	1.164	0.868	0.642	1.109	0.656	0.611	0.535	0.887	0.769	0.864
P40925	0.86	1.613	1.285	0.494	0.362	0.4	0.735	1.423	0.603	1.058	0.704	0.331	0.191	0.461	0.905	1.096	0.8	0.525	1.213	0.821	1.011	0.453	0.852	0.954	0.55	0.491	0.764	0.551	0.954	0.915	0.622	1.382	0.641	1.076	1.32	1	1.014	0.575	1.539	1.119	0.9	0.652	1.119	0.62	0.535	0.461	0.779	0.687	0.865
P14598	0.844	1.658	1.293	0.49	0.369	0.405	0.712	1.448	0.584	1.041	0.714	0.345	0.214	0.42	0.853	1.094	0.771	0.549	1.245	0.842	1.03	0.486	0.927	0.958	0.548	0.516	0.781	0.528	0.943	0.912	0.648	1.416	0.591	1.08	1.267	1.006	1.113	0.635	1.683	1.083	0.9	0.649	1.106	0.65	0.574	0.5	0.861	0.71	0.824
Q9UI08	0.842	1.725	1.322	0.506	0.424	0.439	0.754	1.522	0.53	0.941	0.631	0.325	0.184	0.429	0.868	0.962	0.701	0.507	1.169	0.779	0.99	0.41	0.825	1.011	0.54	0.477	0.765	0.572	1.013	0.972	0.669	1.352	0.642	1.089	1.351	1.032	1.076	0.6	1.653	1.1	0.862	0.696	1.076	0.631	0.581	0.48	0.827	0.66	0.893
Q9Y266	0.869	1.699	1.328	0.523	0.399	0.459	0.77	1.527	0.562	1.015	0.699	0.345	0.201	0.451	0.881	1.112	0.766	0.53	1.221	0.835	1.054	0.457	0.876	1.041	0.555	0.484	0.798	0.571	0.994	0.963	0.649	1.483	0.626	1.135	1.378	1.024	1.09	0.617	1.717	1.16	0.889	0.675	1.116	0.654	0.56	0.492	0.865	0.741	0.831
P22695	0.849	1.67	1.299	0.507	0.379	0.409	0.729	1.512	0.541	0.923	0.652	0.335	0.207	0.451	0.799	1.028	0.821	0.594	1.344	0.894	1.143	0.53	0.999	1.152	0.563	0.508	0.791	0.582	1.024	0.995	0.672	1.484	0.642	1.09	1.322	1.026	1.096	0.663	1.633	1.198	0.896	0.693	1.154	0.694	0.612	0.53	0.968	0.784	0.839
A0A087X188	0.863	1.609	1.234	0.524	0.414	0.428	0.746	1.508	0.529	0.89	0.654	0.354	0.215	0.441	0.824	1.028	0.731	0.558	1.143	0.766	0.98	0.469	0.862	0.878	0.56	0.509	0.829	0.609	1.166	1.081	0.746	1.552	0.633	1.154	1.403	1.092	1.215	0.642	1.854	1.214	0.904	0.659	1.143	0.645	0.61	0.537	0.908	0.738	0.876
P36873	0.784	1.156	0.98	0.516	0.419	0.466	0.808	1.225	0.456	0.648	0.494	0.291	0.21	0.383	0.567	0.774									0.563	0.535	0.783	0.573	1.247	1.177	0.718	1.588									0.832	0.677	1.158	0.671	0.637	0.527	0.882	0.714	1.053
P14550	0.86	1.514	1.2	0.503	0.409	0.444	0.716	1.391	0.589	0.981	0.709	0.349	0.216	0.471	0.839	1.045	0.835	0.56	1.305	0.915	1.11	0.533	0.972	1.067	0.574	0.513	0.813	0.58	1.04	0.959	0.649	1.509	0.649	1.084	1.349	1.03	1.047	0.593	1.573	1.131	0.916	0.682	1.177	0.672	0.628	0.548	0.919	0.755	0.866
P15531	0.74	0.813	0.637	0.634	0.566	0.702	0.438	0.722	0.273	0.348	0.258	0.296	0.181	0.337	0.352	0.426	0.747	0.543	1.166	0.827	0.937	0.445	0.804	0.697	0.578	0.421	0.786	0.604	0.894	0.952	0.548	1.119	0.651	1.095	1.416	1.115	1.015	0.579	1.734	0.977	0.839	0.523	1.144	0.599	0.456	0.433	0.616	0.556	0.903
G3V3H3	0.871	1.664	1.257	0.505	0.38	0.405	0.778	1.488	0.642	1.088	0.772	0.358	0.213	0.463	1.045	1.192	0.832	0.574	1.333	0.941	1.144	0.544	0.979	1.193	0.538	0.496	0.774	0.593	0.994	0.951	0.656	1.474	0.645	1.073	1.348	0.989	1.068	0.615	1.574	1.192	0.939	0.698	1.141	0.635	0.6	0.535	0.882	0.706	0.82
Q9H4A4	0.862	1.743	1.359	0.532	0.391	0.409	0.782	1.572	0.652	1.171	0.806	0.355	0.235	0.511	0.983	1.27	0.785	0.546	1.216	0.847	1.057	0.504	0.89	1.083	0.552	0.508	0.796	0.566	0.992	0.998	0.645	1.537	0.649	1.115	1.34	1.048	1.097	0.671	1.623	1.25	0.889	0.686	1.108	0.671	0.605	0.52	0.877	0.768	0.849
P43686	0.87	1.622	1.265	0.523	0.385	0.439	0.703	1.463	0.601	1.076	0.781	0.361	0.214	0.462	0.848	1.278	0.781	0.548	1.211	0.827	0.994	0.475	0.847	0.998	0.556	0.509	0.783	0.571	0.988	0.969	0.649	1.493	0.653	1.079	1.339	1.045	1.072	0.639	1.591	1.157	0.917	0.667	1.115	0.644	0.562	0.499	0.85	0.724	0.823
Q16822	0.825	1.696	1.243	0.53	0.433	0.456	0.738	1.596	0.613	1.063	0.776	0.359	0.229	0.519	0.91	1.194	0.917	0.639	1.363	1	1.27	0.617	1.074	1.198	0.597	0.549	0.825	0.611	1.132	1.067	0.722	1.584	0.614	1.102	1.326	1.012	1.138	0.657	1.646	1.17	0.909	0.713	1.14	0.687	0.625	0.547	0.967	0.773	0.844
P45880	0.926	1.583	1.322	0.561	0.439	0.454	0.708	1.597	0.556	0.95	0.673	0.36	0.224	0.448	0.83	1.118	0.78	0.502	1.304	0.774	0.989	0.453	0.836	0.981	0.586	0.532	0.849	0.547	1.068	1.034	0.659	1.667	0.68	1.022	1.304	0.941	1.108	0.617	1.655	1.14	0.894	0.648	1.184	0.641	0.556	0.489	0.935	0.73	0.77
O00148	0.848	1.676	1.289	0.52	0.428	0.464	0.785	1.532	0.508	0.874	0.605	0.322	0.224	0.412	0.742	0.973	0.7	0.479	1.113	0.711	0.898	0.409	0.765	0.924	0.568	0.499	0.798	0.555	0.996	0.94	0.691	1.442	0.594	1.162	1.321	1.004	1.137	0.605	1.75	1.157	0.903	0.694	1.094	0.667	0.583	0.509	0.927	0.749	0.86
P23526	0.855	1.595	1.264	0.512	0.375	0.418	0.726	1.426	0.584	1.017	0.725	0.342	0.214	0.509	0.883	1.113	0.807	0.556	1.276	0.851	1.065	0.51	0.912	1.029	0.544	0.494	0.778	0.548	0.966	0.919	0.616	1.446	0.642	1.101	1.304	1.016	1.073	0.632	1.599	1.127	0.902	0.667	1.129	0.663	0.584	0.535	0.905	0.756	0.831
Q00722	0.831	1.623	1.221	0.535	0.42	0.462	0.794	1.54	0.742	1.331	0.883	0.39	0.208	0.652	1.15	1.422	1.037	0.734	1.624	1.125	1.489	0.696	1.227	1.407	0.565	0.538	0.847	0.552	0.992	0.992	0.638	1.573	0.65	1.1	1.362	1.068	1.089	0.679	1.54	1.266	0.852	0.681	1.079	0.63	0.574	0.52	0.896	0.768	0.858
O43747	0.855	1.638	1.22	0.511	0.413	0.431	0.763	1.436	0.639	1.123	0.796	0.355	0.228	0.517	1.004	1.246	0.854	0.602	1.305	0.944	1.12	0.57	0.988	1.093	0.586	0.539	0.804	0.578	0.993	0.989	0.665	1.491	0.664	1.101	1.355	1.015	1.068	0.667	1.587	1.123	0.936	0.692	1.118	0.703	0.655	0.583	0.968	0.786	0.853
Q7Z6Z7	0.892	1.8	1.383	0.533	0.408	0.356	0.793	1.605	0.602	0.982	0.73	0.359	0.207	0.478	0.889	1.096	0.807	0.58	1.298	0.853	1.058	0.527	0.925	1.023	0.603	0.555	0.836	0.628	1.053	1.057	0.695	1.606	0.636	1.204	1.341	1.113	1.168	0.703	1.581	1.17	0.958	0.715	1.158	0.726	0.654	0.555	0.96	0.822	0.851
P31930	0.89	1.709	1.311	0.553	0.439	0.479	0.794	1.569	0.554	0.951	0.665	0.341	0.203	0.537	0.921	1.074	0.787	0.55	1.333	0.873	1.147	0.488	0.927	1.137	0.575	0.51	0.843	0.57	1.059	0.991	0.698	1.559	0.638	1.13	1.449	1.06	1.126	0.661	1.699	1.252	0.885	0.613	1.119	0.641	0.552	0.481	0.821	0.722	0.857
O60313	0.843	1.721	1.308	0.51	0.408	0.412	0.789	1.543	0.599	1.029	0.724	0.349	0.22	0.465	0.907	1.125	0.741	0.552	1.192	0.812	1.009	0.471	0.875	0.983	0.576	0.53	0.798	0.596	1.056	0.992	0.696	1.562	0.656	1.091	1.363	1.038	1.099	0.635	1.605	1.183	0.914	0.68	1.125	0.657	0.607	0.531	0.877	0.774	0.862
P11387	0.758	1.486	1.027	0.429	0.33	0.354	0.609	1.236	0.538	0.874	0.589	0.292	0.175	0.394	0.732	0.949	0.837	0.534	1.225	0.793	1.137	0.519	0.881	1.125	0.519	0.468	0.758	0.476	0.875	0.86	0.593	1.368	0.667	1.101	1.334	1.016	1.046	0.589	1.509	1.101	0.882	0.712	1.137	0.658	0.593	0.492	0.835	0.726	0.817
P56192	0.904	1.762	1.372	0.529	0.391	0.439	0.749	1.59	0.607	1.073	0.75	0.374	0.223	0.479	0.911	1.178	0.888	0.612	1.319	0.928	1.242	0.61	1.031	1.329	0.606	0.55	0.812	0.614	1.046	1.017	0.685	1.625	0.708	1.199	1.324	1.108	1.158	0.66	1.672	1.283	0.888	0.688	1.124	0.669	0.595	0.525	0.884	0.781	0.863
P60228	0.856	1.774	1.35	0.514	0.371	0.416	0.75	1.578	0.608	1.028	0.747	0.325	0.216	0.487	0.969	1.158	0.838	0.58	1.368	0.882	1.168	0.539	0.968	1.176	0.555	0.512	0.839	0.587	1.032	0.997	0.663	1.546	0.66	1.126	1.365	1.047	1.111	0.636	1.715	1.186	0.893	0.67	1.097	0.65	0.618	0.507	0.885	0.738	0.854
P09622	0.842	1.457	1.146	0.494	0.39	0.473	0.739	1.383	0.559	0.93	0.625	0.328	0.197	0.449	0.797	1.005	0.79	0.533	1.218	0.828	1.025	0.461	0.837	0.981	0.52	0.472	0.765	0.507	0.921	0.884	0.562	1.41	0.627	1.064	1.313	0.974	0.992	0.565	1.581	1.135	0.957	0.687	1.156	0.647	0.587	0.53	0.907	0.742	0.862
Q9Y5X3	0.88	1.698	1.358	0.514	0.377	0.391	0.81	1.486	0.666	1.176	0.826	0.377	0.226	0.483	0.953	1.259	0.814	0.562	1.248	0.897	1.106	0.517	0.921	1.041	0.546	0.504	0.781	0.563	0.974	0.941	0.63	1.455	0.679	1.111	1.338	1.045	1.078	0.608	1.562	1.161	0.925	0.657	1.168	0.665	0.61	0.53	0.873	0.749	0.867
P35580																	0.643	0.547	1.097	0.753	0.86	0.349	0.818	0.995									0.766	1.167	1.292	1.018	1.146	0.695	1.731	1.139	0.877	0.621	1.044	0.59	0.607	0.462	0.832	0.834
A0A087WWU8	0.793	1.306	1.028	0.489	0.435	0.435	0.854	1.312	0.484	0.741	0.574	0.321	0.196	0.509	0.732	0.873	0.694	0.491	1.065	0.791	0.902	0.421	0.792	0.935	0.565	0.472	0.783	0.581	1.076	1.033	0.66	1.483	0.658	1.129	1.481	1.131	1.223	0.564	1.819	1.238	0.93	0.683	1.235	0.734	0.619	0.509	0.82	0.746	0.889
Q9NR30	0.805	1.394	1.07	0.491	0.392	0.42	0.673	1.354	0.503	0.826	0.588	0.312	0.186	0.388	0.721	1.015	0.788	0.526	1.2	0.811	0.962	0.495	0.86	0.981	0.573	0.482	0.796	0.542	0.942	0.949	0.639	1.459	0.635	1.102	1.334	1.069	1.094	0.647	1.573	1.043	0.887	0.755	1.178	0.705	0.596	0.539	0.861	0.7	0.865
P05388	0.789	1.582	1.213	0.48	0.35	0.396	0.666	1.324	0.604	1.058	0.737	0.343	0.203	0.444	0.864	1.094	0.751	0.511	1.15	0.801	0.942	0.444	0.779	0.903	0.549	0.48	0.754	0.507	0.869	0.836	0.561	1.4	0.621	1.082	1.295	0.97	0.983	0.588	1.492	1.043	0.963	0.665	1.105	0.572	0.515	0.462	0.781	0.654	0.855
P41091	0.821	1.586	1.263	0.476	0.368	0.405	0.683	1.401	0.596	1.037	0.736	0.342	0.2	0.45	0.894	1.128	0.809	0.556	1.241	0.817	1.049	0.491	0.88	1.024	0.575	0.516	0.785	0.544	1.001	0.926	0.622	1.44	0.646	1.098	1.29	1.004	1.102	0.641	1.605	1.149	0.904	0.705	1.13	0.687	0.619	0.555	0.912	0.768	0.839
P53992	0.864	1.831	1.393	0.544	0.416	0.422	0.826	1.676	0.648	1.119	0.776	0.364	0.226	0.472	0.943	1.225	0.778	0.537	1.24	0.816	0.981	0.475	0.824	1.009	0.573	0.509	0.822	0.577	0.999	1.003	0.672	1.518	0.655	1.103	1.349	1.021	1.077	0.619	1.645	1.15	0.929	0.679	1.111	0.68	0.632	0.535	0.887	0.762	0.786
Q8TEM1	0.851	1.69	1.285	0.569	0.443	0.443	0.731	1.539	0.641	1.172	0.856	0.347	0.253	0.578	0.998	1.282	0.858	0.642	1.402	0.938	1.266	0.599	1.057	1.211	0.582	0.527	0.838	0.573	1.055	1.03	0.71	1.491	0.551	0.961	1.298	0.927	1.145	0.642	1.667	1.25	0.784	0.578	1.113	0.595	0.668	0.578	1.065	0.867	0.776
Q9BY44	0.848	1.684	1.341	0.506	0.379	0.385	0.761	1.525	0.557	0.95	0.685	0.318	0.186	0.411	0.829	1.041	0.836	0.589	1.354	0.924	1.133	0.547	1.031	1.091	0.553	0.516	0.826	0.603	1.021	0.99	0.693	1.509	0.613	1.057	1.361	1.006	1.095	0.616	1.682	1.126	0.918	0.695	1.172	0.682	0.632	0.536	0.942	0.714	0.869
O60488	0.843	1.603	1.28	0.555	0.419	0.438	0.752	1.485	0.671	1.156	0.803	0.34	0.237	0.499	0.958	1.315	0.897	0.624	1.49	1.009	1.262	0.605	1.115	1.218	0.543	0.483	0.75	0.544	0.994	0.958	0.663	1.425	0.614	1.065	1.347	1.033	1.043	0.675	1.552	1.142	0.844	0.647	1.185	0.716	0.638	0.505	0.997	0.771	0.819
Q6NUK1	0.883	1.661	1.324	0.524	0.4	0.442	0.748	1.533	0.632	1.121	0.791	0.35	0.216	0.509	0.995	1.265	0.847	0.589	1.319	0.926	1.176	0.548	0.98	1.088	0.563	0.51	0.793	0.563	1.012	0.975	0.647	1.538	0.641	1.066	1.447	1.037	1.049	0.603	1.613	1.205	0.896	0.643	1.159	0.624	0.587	0.511	0.836	0.75	0.877
Q14103	0.731	1.54	1.179	0.438	0.319	0.423	0.641	1.249	0.476	0.775	0.538	0.284	0.205	0.335	0.62	0.783	0.654	0.431	0.994	0.639	0.815	0.386	0.681	0.684	0.563	0.472	0.75	0.508	0.902	0.882	0.571	1.304	0.573	1.04	1.274	0.954	0.991	0.578	1.503	1.057	0.898	0.654	1.114	0.641	0.549	0.462	0.797	0.663	0.771
P62140	0.765	1.612	1.158	0.489	0.343	0.41	0.677	1.381	0.647	1.098	0.783	0.302	0.27	0.621	1.144	1.311									0.644	0.556	0.808	0.62	1.167	1	0.751	1.521	0.637	1.09	1.304	0.994	1.119	0.716	1.581	1.208	0.916	0.681	1.226	0.702	0.667	0.607	0.958	0.788	0.855
Q9NTJ5	0.844	1.58	1.273	0.511	0.381	0.393	0.752	1.441	0.622	1.073	0.753	0.363	0.234	0.497	0.912	1.177	0.836	0.576	1.307	0.884	1.087	0.531	0.946	1.123	0.57	0.513	0.812	0.591	1.055	0.999	0.693	1.463	0.643	1.057	1.29	1.004	1.077	0.633	1.604	1.12	0.87	0.683	1.124	0.648	0.602	0.523	0.904	0.744	0.817
P24752	0.801	1.498	1.167	0.478	0.362	0.389	0.698	1.348	0.549	0.906	0.647	0.341	0.209	0.402	0.718	1	0.809	0.543	1.211	0.803	1.024	0.494	0.876	0.916	0.545	0.482	0.761	0.521	0.964	0.932	0.638	1.434	0.638	1.053	1.306	0.944	1.06	0.583	1.666	1.121	0.926	0.679	1.162	0.656	0.614	0.544	0.972	0.744	0.793
A0A087X1Z3	0.829	1.594	1.196	0.452	0.378	0.453	0.687	1.376	0.527	0.92	0.675	0.339	0.196	0.489	0.908	1.006	0.838	0.581	1.296	0.852	1.113	0.493	0.9	1.049	0.527	0.476	0.764	0.575	1	1	0.637	1.451	0.606	0.943	1.314	0.965	0.95	0.534	1.51	1.138	0.935	0.616	1.154	0.564	0.561	0.485	0.726	0.627	0.889
Q9NUQ9	0.907	1.69	1.295	0.546	0.409	0.443	0.834	1.526	0.567	0.988	0.732	0.363	0.201	0.525	0.902	1.1	0.842	0.595	1.309	0.903	1.121	0.506	1.08	1.177	0.564	0.521	0.828	0.604	1.086	1.04	0.698	1.53	0.658	1.187	1.446	1.1	1.193	0.627	1.789	1.277	0.911	0.633	1.147	0.621	0.588	0.526	0.832	0.722	0.913
Q16719	0.86	1.695	1.319	0.515	0.36	0.389	0.778	1.534	0.696	1.175	0.835	0.359	0.237	0.528	1.049	1.311	0.829	0.581	1.298	0.917	1.125	0.566	0.972	1.117	0.554	0.485	0.808	0.576	0.98	0.966	0.641	1.434	0.658	1.12	1.372	1.078	1.057	0.649	1.584	1.138	0.935	0.648	1.119	0.64	0.563	0.495	0.809	0.715	0.85
Q92896	0.912	1.822	1.373	0.603	0.463	0.509	0.854	1.672	0.587	0.96	0.669	0.368	0.204	0.455	0.848	1.024	0.772	0.542	1.178	0.81	0.976	0.461	0.87	0.916	0.655	0.531	0.806	0.613	1.101	1.091	0.734	1.608	0.67	1.187	1.474	1.08	1.213	0.67	1.856	1.192	0.917	0.697	1.127	0.646	0.584	0.515	0.875	0.742	0.866
O95202	0.885	1.662	1.297	0.537	0.404	0.414	0.747	1.556	0.616	1.08	0.772	0.348	0.238	0.489	0.92	1.214	0.974	0.662	1.447	1.075	1.29	0.688	1.097	1.229	0.552	0.505	0.778	0.565	0.987	0.972	0.617	1.468	0.645	1.104	1.344	1.02	1.082	0.623	1.602	1.194	0.917	0.652	1.106	0.634	0.605	0.525	0.861	0.746	0.853
Q9NTK5	0.849	1.586	1.238	0.488	0.381	0.435	0.763	1.409	0.55	0.966	0.665	0.317	0.184	0.427	0.879	1.021	0.809	0.546	1.265	0.836	1.016	0.492	0.874	1.038	0.549	0.491	0.799	0.547	0.987	0.939	0.617	1.471	0.611	1.067	1.347	1.012	1.024	0.598	1.553	1.133	0.86	0.631	1.073	0.595	0.541	0.459	0.775	0.687	0.856
Q9BUJ2	0.844	1.635	1.249	0.528	0.411	0.458	0.777	1.505	0.571	0.951	0.671	0.334	0.204	0.477	0.852	1.046	0.759	0.546	1.252	0.811	1.062	0.48	0.895	1.023	0.571	0.504	0.803	0.581	1.037	0.992	0.679	1.529	0.625	1.091	1.292	0.996	1.073	0.614	1.628	1.12	0.861	0.665	1.097	0.631	0.571	0.505	0.834	0.71	0.828
B4DY09	0.814	1.64	1.253	0.474	0.338	0.356	0.706	1.365	0.67	1.18	0.794	0.34	0.2	0.476	0.89	1.194	0.903	0.636	1.399	0.989	1.172	0.596	1.033	1.13	0.582	0.522	0.797	0.579	0.955	0.927	0.647	1.449	0.636	1.088	1.315	1.025	1.056	0.643	1.41	1.08	0.905	0.669	1.073	0.633	0.546	0.497	0.817	0.7	0.85
P38919	0.871	1.78	1.413	0.512	0.391	0.37	0.818	1.592	0.649	1.216	0.828	0.345	0.244	0.525	1.038	1.29	0.775	0.526	1.213	0.832	1.027	0.483	0.879	1.01	0.571	0.516	0.841	0.55	0.995	0.951	0.627	1.51	0.609	1.104	1.384	1.042	1.077	0.638	1.649	1.174	0.879	0.659	1.123	0.674	0.636	0.535	0.94	0.777	0.822
Q13618	0.906	1.736	1.342	0.568	0.45	0.443	0.813	1.567	0.614	1.065	0.767	0.357	0.221	0.51	0.974	1.164	0.819	0.587	1.221	0.872	1.055	0.532	0.896	1.032	0.565	0.504	0.776	0.585	0.995	0.966	0.653	1.481	0.691	1.182	1.356	1.099	1.189	0.69	1.736	1.295	0.907	0.708	1.095	0.644	0.615	0.529	0.864	0.738	0.818
P31150	0.944	1.78	1.322	0.543	0.449	0.485	0.86	1.652	0.793	1.554	1.068	0.441	0.223	0.781	1.396	1.634	0.758	0.564	1.217	0.842	0.987	0.52	0.868	0.996	0.632	0.524	0.895	0.591	1.184	1.051	0.745	1.484	0.567	1.177	1.389	1.043	1.07	0.63	1.775	1.147	0.852	0.674	1.056	0.644	0.575	0.482	0.83	0.703	0.897
Q99714	0.895	1.754	1.376	0.552	0.467	0.483	0.784	1.612	0.609	1.11	0.786	0.34	0.243	0.421	0.977	1.258	0.79	0.555	1.245	0.842	1.139	0.537	0.958	1.026	0.565	0.532	0.803	0.563	1.056	1.013	0.724	1.573	0.65	1.133	1.411	1.099	1.14	0.656	1.732	1.321	0.965	0.714	1.145	0.736	0.743	0.619	1.143	0.845	0.85
O00203	0.833	1.586	1.219	0.492	0.404	0.432	0.712	1.474	0.603	1.115	0.777	0.393	0.234	0.516	0.916	1.188	0.853	0.555	1.289	0.919	1.141	0.583	0.991	1.178	0.605	0.533	0.762	0.603	0.998	0.998	0.682	1.442	0.672	1.127	1.328	1.046	1.098	0.673	1.548	1.238	0.947	0.706	1.132	0.695	0.627	0.549	0.927	0.79	0.868
O94973	0.88	1.704	1.34	0.513	0.394	0.378	0.718	1.501	0.782	1.278	0.905	0.388	0.263	0.601	1.195	1.419	0.751	0.507	1.164	0.808	0.989	0.49	0.884	0.877	0.554	0.519	0.794	0.597	0.99	1.007	0.65	1.502	0.661	1.081	1.37	1.116	1.077	0.688	1.555	1.226	0.889	0.63	1.075	0.675	0.583	0.5	0.868	0.722	0.846
Q13740	0.9	1.575	1.255	0.525	0.386	0.412	0.785	1.488	0.568	0.912	0.682	0.348	0.213	0.449	0.885	1.041	0.854	0.563	1.299	0.904	1.101	0.518	0.933	1.076	0.577	0.477	0.827	0.591	1.012	1.014	0.663	1.454	0.694	1.175	1.441	1.123	1.128	0.629	1.768	1.268	0.88	0.658	1.132	0.64	0.573	0.479	0.817	0.692	0.901
Q92900	0.87	1.754	1.349	0.557	0.452	0.482	0.773	1.665	0.49	0.839	0.628	0.333	0.216	0.416	0.765	0.998	0.832	0.589	1.308	0.879	1.173	0.555	0.984	1.162	0.548	0.519	0.778	0.584	1.075	1.003	0.691	1.557	0.658	1.147	1.289	1.03	1.126	0.655	1.609	1.191	0.909	0.67	1.125	0.685	0.623	0.554	0.962	0.783	0.822
Q6IBS0	0.881	1.78	1.397	0.518	0.391	0.428	0.756	1.559	0.579	1.019	0.705	0.348	0.198	0.434	0.827	1.104	0.768	0.518	1.169	0.802	0.947	0.457	0.836	0.878	0.539	0.485	0.768	0.548	0.934	0.904	0.59	1.384	0.639	1.116	1.366	1.037	1.05	0.627	1.616	1.173	0.898	0.675	1.125	0.626	0.558	0.487	0.824	0.714	0.849
A0A087X2I1	0.854	1.748	1.364	0.517	0.404	0.431	0.775	1.572	0.599	1.066	0.749	0.349	0.214	0.528	0.962	1.174	0.802	0.544	1.242	0.88	1.059	0.513	0.909	1.03	0.562	0.505	0.789	0.58	1.014	0.985	0.648	1.474	0.659	1.156	1.414	1.061	1.102	0.64	1.687	1.196	0.886	0.683	1.119	0.66	0.582	0.497	0.882	0.736	0.861
H7BXI1	0.88	1.731	1.34	0.547	0.442	0.466	0.797	1.579	0.604	1.052	0.742	0.35	0.219	0.471	0.922	1.168	0.847	0.6	1.296	0.899	1.128	0.558	0.98	1.152	0.6	0.521	0.844	0.59	1.07	1.05	0.685	1.66	0.665	1.121	1.375	1.062	1.155	0.656	1.66	1.201	0.894	0.695	1.104	0.646	0.62	0.516	0.876	0.72	0.826
P21964	0.881	1.844	1.44	0.49	0.36	0.402	0.849	1.646	0.655	1.21	0.826	0.351	0.219	0.558	1.066	1.308	0.82	0.571	1.35	0.955	1.147	0.524	0.943	1.187	0.541	0.486	0.807	0.559	0.957	0.909	0.629	1.484	0.665	1.137	1.44	1.081	1.073	0.642	1.562	1.217	0.897	0.647	1.094	0.628	0.539	0.491	0.808	0.743	0.864
P62701	0.801	1.55	1.197	0.455	0.351	0.397	0.661	1.337	0.575	1.022	0.685	0.333	0.197	0.417	0.801	1.082	0.815	0.57	1.294	0.85	1.075	0.492	0.895	1.023	0.566	0.5	0.793	0.559	0.978	0.928	0.62	1.464	0.619	1.092	1.347	1.004	1.066	0.634	1.568	1.117	0.913	0.67	1.08	0.627	0.553	0.498	0.843	0.702	0.808
Q15008	0.896	1.683	1.325	0.536	0.413	0.439	0.807	1.553	0.59	1.037	0.73	0.362	0.215	0.481	0.894	1.138	0.753	0.523	1.202	0.821	1.001	0.464	0.848	1.06	0.57	0.509	0.856	0.604	1.051	1.008	0.696	1.591	0.634	1.103	1.371	1.042	1.08	0.609	1.707	1.19	0.884	0.68	1.128	0.651	0.6	0.509	0.85	0.756	0.873
E9PKG1	0.791	1.647	1.283	0.482	0.374	0.432	0.709	1.445	0.568	0.97	0.687	0.321	0.195	0.411	0.8	1.035	0.756	0.506	1.174	0.789	0.981	0.454	0.825	0.91	0.555	0.489	0.786	0.537	0.958	0.912	0.608	1.462	0.641	1.087	1.34	0.992	1.052	0.634	1.566	1.129	0.91	0.677	1.137	0.636	0.559	0.474	0.856	0.719	0.847
Q16643	0.876	1.505	1.23	0.51	0.415	0.448	0.812	1.487	0.506	0.8	0.581	0.31	0.169	0.423	0.756	0.968	0.739	0.519	1.198	0.799	1.043	0.437	0.869	1.063	0.561	0.464	0.773	0.556	1.037	0.939	0.647	1.515	0.675	1.168	1.505	1.086	1.161	0.647	1.774	1.267	0.895	0.685	1.161	0.666	0.588	0.504	0.873	0.764	0.862
Q9HD20	0.875	1.734	1.353	0.537	0.443	0.5	0.813	1.624	0.52	0.86	0.63	0.369	0.203	0.48	0.789	0.982	0.722	0.521	1.159	0.875	0.984	0.479	0.911	0.991	0.595	0.509	0.771	0.577	1.058	1.043	0.678	1.557	0.627	1.148	1.378	1.073	1.11	0.69	1.735	1.19	0.907	0.683	1.133	0.66	0.61	0.538	0.886	0.754	0.872
P55010	0.883	1.697	1.311	0.504	0.407	0.431	0.796	1.553	0.496	0.828	0.617	0.306	0.215	0.411	0.783	0.957	0.776	0.539	1.219	0.804	1.013	0.486	0.856	1.005	0.548	0.478	0.781	0.544	0.985	0.995	0.633	1.479	0.609	1.062	1.336	0.995	1.026	0.565	1.624	1.149	0.917	0.64	1.15	0.635	0.653	0.556	0.879	0.701	0.871
Q96AG4	0.844	1.603	1.272	0.521	0.379	0.379	0.694	1.41	0.575	0.963	0.693	0.365	0.22	0.422	0.76	1.033	0.819	0.549	1.138	0.841	0.998	0.497	0.857	0.91	0.543	0.496	0.738	0.537	0.897	0.874	0.588	1.311	0.633	1.019	1.254	0.952	0.952	0.494	1.463	1.098	0.925	0.646	1.101	0.544	0.565	0.498	0.763	0.651	0.883
P15498	0.886	1.634	1.294	0.545	0.421	0.448	0.768	1.522	0.529	0.887	0.635	0.332	0.207	0.429	0.762	0.991	0.807	0.561	1.258	0.889	1.11	0.502	0.947	1.103	0.573	0.518	0.816	0.575	1.049	0.999	0.682	1.58	0.626	1.114	1.412	1.058	1.14	0.649	1.685	1.243	0.896	0.673	1.143	0.683	0.599	0.523	0.972	0.789	0.854
Q14258	0.848	1.564	1.257	0.522	0.398	0.435	0.717	1.38	0.518	0.828	0.608	0.331	0.201	0.417	0.765	0.928	0.748	0.548	1.209	0.791	0.972	0.487	0.838	0.914	0.581	0.524	0.786	0.562	0.988	0.95	0.628	1.396	0.614	1.077	1.29	1.005	1.049	0.642	1.59	1.089	0.875	0.652	1.075	0.645	0.559	0.475	0.821	0.698	0.825
Q8N163	0.842	1.608	1.241	0.519	0.409	0.449	0.752	1.489	0.599	0.982	0.719	0.338	0.212	0.477	0.877	1.104	0.737	0.527	1.132	0.785	0.967	0.47	0.836	0.926	0.587	0.52	0.811	0.59	1.008	1.004	0.67	1.498	0.666	1.165	1.384	1.069	1.178	0.701	1.73	1.202	0.884	0.67	1.137	0.654	0.602	0.547	0.882	0.763	0.848
P23284	0.793	1.599	1.22	0.458	0.339	0.409	0.608	1.345	0.502	0.853	0.579	0.304	0.19	0.35	0.69	0.896	0.694	0.445	1.073	0.684	0.867	0.391	0.693	0.813	0.522	0.46	0.729	0.495	0.871	0.86	0.564	1.331	0.601	1.048	1.272	0.931	1.026	0.571	1.587	1.077	0.913	0.655	1.103	0.58	0.534	0.447	0.792	0.651	0.795
Q09161	0.816	1.51	1.231	0.506	0.402	0.429	0.777	1.448	0.627	1.023	0.708	0.347	0.232	0.494	0.961	1.124	0.843	0.576	1.319	0.919	1.104	0.525	0.98	1.08	0.577	0.501	0.785	0.564	0.99	0.998	0.682	1.457	0.632	1.114	1.405	1.042	1.061	0.674	1.541	1.155	0.899	0.644	1.065	0.669	0.602	0.551	0.836	0.766	0.874
Q5JVZ5	0.852	1.688	1.351	0.528	0.392	0.426	0.742	1.554	0.574	1.004	0.716	0.353	0.238	0.491	0.887	1.124	0.788	0.536	1.205	0.826	1.022	0.486	0.866	0.989	0.562	0.522	0.807	0.596	1.026	1.035	0.681	1.468	0.635	1.094	1.321	1.019	1.05	0.62	1.631	1.074	0.898	0.656	1.09	0.66	0.606	0.518	0.887	0.737	0.842
Q99615	0.852	1.654	1.274	0.511	0.435	0.472	0.787	1.531	0.496	0.84	0.603	0.332	0.185	0.455	0.765	0.951	0.698	0.551	1.206	0.823	1.023	0.448	0.863	0.95	0.575	0.52	0.849	0.578	1.07	1.048	0.697	1.568	0.657	1.165	1.4	1.083	1.167	0.643	1.816	1.204	0.874	0.664	1.143	0.662	0.606	0.508	0.898	0.755	0.863
P55084	0.855	1.639	1.284	0.523	0.391	0.423	0.711	1.492	0.551	0.96	0.678	0.335	0.215	0.425	0.804	1.076	0.782	0.522	1.222	0.802	1.011	0.474	0.805	0.955	0.546	0.492	0.782	0.54	0.969	0.951	0.624	1.472	0.639	1.096	1.322	0.986	1.052	0.618	1.616	1.125	0.923	0.685	1.146	0.649	0.606	0.505	0.898	0.753	0.833
P35527	2.097	1.849	1.595	0.54	0.613	0.888	1.024	1.663	0.429	1.514	0.533	0.269	0.375	0.618	0.452	0.733	0.982	0.363	0.865	0.764	0.879	0.799	0.962	1.48	0.933	0.851	1.425	0.503	2.064	1.193	0.892	1.494	0.504	0.83	0.717	0.482	0.967	0.294	1.642	1.077	1.173	2.548	1.182	1.032	1.02	4.292	1.267	1.349	1.113
O43852	0.868	1.624	1.263	0.514	0.42	0.48	0.835	1.503	0.533	0.906	0.64	0.341	0.202	0.454	0.818	0.971	0.717	0.509	1.134	0.777	0.975	0.463	0.844	0.985	0.591	0.51	0.817	0.588	1.067	1.011	0.663	1.586	0.664	1.136	1.421	1.11	1.138	0.628	1.707	1.276	0.902	0.664	1.159	0.649	0.58	0.484	0.813	0.753	0.9
P01892	0.852	1.572	1.226	0.533	0.411	0.455	0.801	1.483	0.515	0.876	0.622	0.34	0.199	0.429	0.746	0.989	0.731	0.508	1.151	0.779	0.978	0.422	0.811	1.022	0.566	0.493	0.785	0.558	1.011	0.991	0.664	1.528	0.65	1.129	1.394	1.045	1.109	0.602	1.727	1.194	0.851	0.65	1.136	0.633	0.604	0.488	0.87	0.719	0.848
O60701	0.862	1.504	1.162	0.566	0.51	0.539	0.787	1.483	0.75	1.521	1.001	0.355	0.215	0.575	1.352	1.706	0.939	0.623	1.551	1.037	1.383	0.644	1.167	1.44	0.532	0.479	0.81	0.56	0.994	0.983	0.679	1.5	0.653	1.169	1.467	1.111	1.244	0.699	1.793	1.309	0.899	0.677	1.121	0.659	0.615	0.522	0.938	0.792	0.843
P48960	0.908	1.56	1.219	0.519	0.419	0.472	0.784	1.463	0.49	0.867	0.669	0.341	0.201	0.443	0.814	1.003	0.838	0.555	1.271	0.918	1.148	0.54	0.963	1.094	0.539	0.449	0.816	0.598	1.075	1.039	0.676	1.483	0.646	1.098	1.401	1.089	1.083	0.535	1.629	1.256	0.93	0.586	1.133	0.549	0.562	0.516	0.771	0.642	0.982
Q9UNM6	0.851	1.61	1.2	0.526	0.408	0.46	0.756	1.497	0.577	0.96	0.701	0.346	0.247	0.426	0.814	1.07	0.818	0.537	1.186	0.833	1.056	0.506	0.87	0.937	0.538	0.487	0.749	0.535	0.928	0.888	0.589	1.397	0.649	1.067	1.29	0.987	1.013	0.593	1.542	1.106	0.928	0.68	1.169	0.685	0.631	0.556	0.912	0.728	0.888
P30084	0.882	1.775	1.428	0.517	0.384	0.426	0.757	1.577	0.523	0.894	0.677	0.339	0.189	0.451	0.796	0.981	0.783	0.507	1.17	0.816	0.958	0.441	0.82	0.917	0.539	0.452	0.774	0.545	0.957	0.921	0.599	1.446	0.649	1.087	1.343	0.991	1.004	0.589	1.558	1.102	0.933	0.664	1.132	0.636	0.561	0.489	0.872	0.702	0.854
P00966	0.824	1.597	1.253	0.475	0.351	0.394	0.718	1.413	0.605	1.048	0.731	0.336	0.202	0.455	0.878	1.116	0.804	0.554	1.231	0.835	1.043	0.5	0.892	0.965	0.566	0.495	0.764	0.565	0.999	0.969	0.659	1.441	0.637	1.119	1.332	1.022	1.087	0.611	1.7	1.135	0.934	0.678	1.131	0.617	0.542	0.479	0.831	0.713	0.831
P40121	0.83	1.49	1.154	0.488	0.372	0.417	0.677	1.316	0.528	0.868	0.578	0.308	0.198	0.414	0.775	0.932	0.817	0.542	1.281	0.841	1.039	0.485	0.882	0.944	0.545	0.473	0.749	0.534	0.932	0.902	0.601	1.351	0.612	1.064	1.247	0.947	1.051	0.582	1.565	1.025	0.889	0.653	1.096	0.606	0.537	0.459	0.797	0.658	0.824
P12277	0.867	1.655	1.304	0.53	0.408	0.433	0.781	1.545	0.617	1.063	0.754	0.377	0.223	0.541	0.966	1.189	0.79	0.526	1.203	0.864	1.024	0.502	0.869	0.968	0.571	0.524	0.816	0.605	1.044	0.994	0.684	1.517	0.651	1.084	1.365	1.077	1.033	0.651	1.466	1.143	0.915	0.683	1.132	0.667	0.579	0.5	0.84	0.726	0.905
P62191	0.909	1.756	1.418	0.558	0.41	0.437	0.822	1.636	0.616	1.03	0.76	0.349	0.214	0.502	0.923	1.137	0.788	0.554	1.273	0.817	1.029	0.489	0.883	1.058	0.557	0.506	0.78	0.569	1.036	0.987	0.672	1.52	0.638	1.076	1.316	1.026	1.092	0.614	1.606	1.146	0.918	0.671	1.121	0.682	0.615	0.504	0.881	0.761	0.853
Q86UE4	0.91	1.587	1.223	0.548	0.41	0.416	0.727	1.503	0.591	1.007	0.743	0.352	0.207	0.485	0.847	1.114	0.859	0.62	1.31	0.925	1.12	0.567	1.011	1.164	0.534	0.492	0.768	0.566	0.949	1.002	0.628	1.412	0.704	1.159	1.4	1.079	1.124	0.658	1.776	1.206	0.939	0.729	1.214	0.687	0.659	0.569	0.945	0.776	0.821
Q9BZF1	0.834	1.726	1.365	0.519	0.412	0.435	0.748	1.596	0.568	1.026	0.698	0.329	0.192	0.479	0.918	1.129	0.75	0.54	1.247	0.84	1.05	0.48	0.914	1.038	0.522	0.493	0.804	0.541	0.984	0.917	0.639	1.458	0.618	1.099	1.402	1.068	1.109	0.601	1.711	1.164	0.885	0.655	1.097	0.629	0.572	0.466	0.84	0.734	0.836
J3KN16	0.871	1.612	1.276	0.55	0.392	0.44	0.697	1.456	0.645	1.135	0.787	0.356	0.258	0.471	0.924	1.266	0.822	0.596	1.387	0.977	1.183	0.608	0.991	1.148	0.557	0.507	0.799	0.575	0.963	0.928	0.652	1.452	0.628	1.035	1.295	1.019	1.11	0.68	1.436	1.208	0.858	0.676	1.119	0.68	0.643	0.565	0.9	0.769	0.841
O15067	0.892	1.707	1.281	0.542	0.443	0.463	0.778	1.57	0.544	0.91	0.637	0.343	0.226	0.452	0.776	1.01	0.779	0.581	1.215	0.813	1.046	0.498	0.946	1.072	0.573	0.531	0.847	0.602	1.055	1.041	0.703	1.538	0.677	1.187	1.409	1.121	1.285	0.706	1.954	1.296	0.934	0.689	1.131	0.669	0.65	0.536	0.918	0.759	0.825
P52565	0.864	1.543	1.251	0.542	0.417	0.484	0.831	1.478	0.475	0.75	0.535	0.313	0.186	0.422	0.736	0.838	0.708	0.489	1.143	0.743	0.948	0.403	0.791	0.901	0.564	0.476	0.852	0.577	1.034	0.979	0.643	1.516	0.635	1.154	1.476	1.078	1.141	0.592	1.812	1.2	0.866	0.662	1.184	0.651	0.595	0.502	0.879	0.719	0.898
Q9Y3L3	0.926	1.775	1.345	0.534	0.429	0.448	0.837	1.594	0.603	1.038	0.773	0.378	0.209	0.474	0.863	1.147	0.795	0.554	1.201	0.829	1.049	0.464	0.883	1.077	0.566	0.462	0.812	0.579	0.965	0.971	0.601	1.444	0.639	1.111	1.385	1.014	1.04	0.587	1.708	1.166	0.921	0.643	1.15	0.602	0.613	0.506	0.792	0.719	0.92
Q13011	0.854	1.656	1.312	0.523	0.408	0.459	0.741	1.516	0.589	0.941	0.615	0.322	0.207	0.44	0.756	1.045	0.742	0.512	1.158	0.737	0.965	0.447	0.834	0.922	0.537	0.504	0.74	0.541	0.975	0.951	0.638	1.388	0.63	1.055	1.256	0.972	1.071	0.61	1.697	1.125	0.929	0.683	1.13	0.637	0.572	0.486	0.878	0.735	0.747
P09429	0.822	1.627	1.243	0.49	0.34	0.415	0.731	1.423	0.578	0.995	0.666	0.322	0.178	0.401	0.816	1.028	0.807	0.563	1.284	0.816	1.062	0.456	0.84	1.045	0.511	0.432	0.743	0.526	0.916	0.862	0.549	1.328	0.643	1.06	1.296	0.949	1.014	0.547	1.591	1.09	0.904	0.64	1.132	0.589	0.523	0.442	0.809	0.668	0.811
Q9H223	0.858	1.681	1.278	0.512	0.43	0.462	0.781	1.548	0.596	1.077	0.799	0.348	0.208	0.528	0.891	1.21	0.942	0.659	1.387	1.006	1.253	0.653	1.086	1.195	0.56	0.521	0.797	0.607	1.005	0.97	0.656	1.483	0.672	1.07	1.369	1.067	1.121	0.649	1.549	1.176	0.882	0.645	1.092	0.64	0.594	0.527	0.846	0.743	0.792
P39656	0.873	1.522	1.237	0.526	0.407	0.46	0.734	1.372	0.581	0.924	0.655	0.33	0.214	0.431	0.803	1.009	0.753	0.503	1.141	0.785	0.985	0.463	0.821	0.905	0.548	0.49	0.801	0.561	0.988	0.93	0.645	1.486	0.624	1.086	1.306	1.017	1.065	0.651	1.554	1.106	0.879	0.662	1.104	0.669	0.635	0.521	0.9	0.784	0.825
Q04917	0.847	1.591	1.277	0.473	0.355	0.38	0.826	1.458	0.619	1.114	0.777	0.356	0.21	0.503	0.921	1.187	0.787	0.506	1.198	0.869	1.051	0.495	0.883	0.983	0.559	0.509	0.775	0.569	0.976	0.975	0.63	1.466	0.633	1.076	1.393	1.063	1.053	0.576	1.548	1.174	0.925	0.663	1.136	0.646	0.585	0.494	0.832	0.699	0.829
P16885	0.851	1.604	1.236	0.483	0.363	0.332	0.716	1.451	0.542	0.973	0.714	0.37	0.238	0.45	0.827	1.107	0.824	0.602	1.287	0.937	1.166	0.549	1.006	1.118	0.59	0.567	0.805	0.564	1.034	0.953	0.666	1.528	0.656	1.083	1.339	1.014	1.1	0.652	1.559	1.17	0.923	0.693	1.104	0.662	0.656	0.585	0.981	0.795	0.813
P84077	0.877	1.775	1.435	0.523	0.396	0.453	0.811	1.648	0.531	0.93	0.65	0.333	0.218	0.446	0.86	0.984	0.608	0.403	0.988	0.63	0.798	0.372	0.663	0.737	0.536	0.475	0.786	0.547	0.974	0.945	0.655	1.423	0.638	1.124	1.356	1.037	1.114	0.632	1.725	1.167	0.891	0.647	1.08	0.623	0.567	0.474	0.828	0.691	0.832
J3KN67	0.821	1.524	1.173	0.469	0.364	0.398	0.8	1.305	0.617	1.042	0.702	0.33	0.208	0.482	0.921	1.082	0.832	0.562	1.233	0.857	1.085	0.469	0.888	1.067	0.531	0.464	0.772	0.556	0.978	0.909	0.611	1.384	0.683	1.051	1.315	0.976	1.006	0.535	1.514	1.1	0.926	0.641	1.139	0.609	0.553	0.494	0.809	0.679	0.888
A0A0C4DGB5	0.874	1.563	1.215	0.518	0.386	0.463	0.711	1.441	0.481	0.786	0.572	0.331	0.173	0.373	0.652	0.816	0.783	0.602	1.243	0.86	1.086	0.471	0.943	1.094	0.571	0.488	0.786	0.64	1.074	1.097	0.699	1.487	0.664	1.088	1.354	1.042	1.07	0.579	1.693	1.141	0.954	0.717	1.143	0.624	0.576	0.5	0.795	0.692	0.96
A0A1B0GTJ7	0.866	1.667	1.305	0.516	0.403	0.442	0.81	1.563	0.59	1.016	0.735	0.349	0.194	0.514	0.932	1.128	0.908	0.608	1.409	0.985	1.202	0.56	1.047	1.198	0.559	0.507	0.809	0.591	1.024	1.005	0.652	1.521	0.658	1.108	1.353	1.053	1.087	0.643	1.575	1.209	0.89	0.656	1.115	0.6	0.581	0.503	0.847	0.709	0.879
Q7L2H7	0.81	1.511	1.169	0.514	0.354	0.424	0.661	1.284	0.668	1.162	0.796	0.356	0.226	0.52	1.05	1.288	0.803	0.567	1.306	0.875	1.1	0.525	0.892	0.991	0.544	0.496	0.813	0.555	0.902	0.904	0.585	1.406	0.637	1.069	1.428	1.026	1.016	0.637	1.428	1.193	0.911	0.632	1.107	0.634	0.552	0.494	0.809	0.743	0.874
Q9BXJ9	0.846	1.671	1.293	0.493	0.382	0.399	0.769	1.501	0.595	1.045	0.726	0.339	0.193	0.517	0.976	1.163	0.885	0.637	1.415	0.979	1.249	0.569	1.033	1.311	0.56	0.501	0.778	0.569	1.062	1.004	0.666	1.522	0.646	1.096	1.329	0.953	1.072	0.612	1.638	1.189	0.878	0.655	1.123	0.626	0.578	0.508	0.865	0.769	0.87
Q02878	0.804	1.487	1.133	0.497	0.382	0.437	0.654	1.303	0.53	0.845	0.587	0.304	0.21	0.422	0.769	0.913	0.753	0.507	1.175	0.735	0.925	0.437	0.752	0.875	0.557	0.498	0.761	0.527	0.935	0.898	0.591	1.399	0.623	1.106	1.273	0.965	1.039	0.594	1.58	1.027	0.906	0.658	1.085	0.633	0.55	0.486	0.86	0.657	0.786
P21266	0.863	1.607	1.291	0.514	0.382	0.399	0.756	1.419	0.675	1.131	0.79	0.348	0.209	0.52	1.001	1.213	0.851	0.593	1.337	0.926	1.115	0.534	0.963	1.074	0.553	0.498	0.816	0.593	0.994	0.944	0.641	1.437	0.644	1.077	1.387	1.054	1.056	0.64	1.506	1.175	0.889	0.668	1.125	0.684	0.567	0.498	0.879	0.751	0.813
P25786	0.825	1.49	1.157	0.509	0.406	0.452	0.701	1.346	0.501	0.828	0.599	0.31	0.211	0.41	0.729	0.902	0.727	0.514	1.142	0.757	0.955	0.44	0.815	0.905	0.552	0.486	0.819	0.55	0.986	0.947	0.632	1.387	0.632	1.093	1.326	0.993	1.098	0.596	1.765	1.162	0.882	0.663	1.12	0.622	0.583	0.495	0.879	0.724	0.848
Q9UBE0	0.838	1.622	1.26	0.516	0.402	0.449	0.768	1.465	0.576	1.022	0.744	0.346	0.2	0.456	0.801	1.119	0.719	0.492	1.128	0.789	0.902	0.443	0.766	0.899	0.553	0.48	0.751	0.539	0.91	0.882	0.567	1.423	0.618	1.057	1.258	0.992	1.013	0.602	1.494	1.1	0.902	0.68	1.1	0.612	0.541	0.476	0.765	0.71	0.865
P23219	0.813	1.539	1.195	0.506	0.402	0.475	0.752	1.47	0.574	0.985	0.721	0.352	0.212	0.467	0.905	1.097	0.767	0.538	1.19	0.813	1.031	0.477	0.933	1.005	0.559	0.481	0.775	0.552	0.976	0.967	0.648	1.486	0.637	1.09	1.351	0.987	1.106	0.618	1.684	1.144	0.897	0.677	1.111	0.65	0.628	0.524	0.914	0.766	0.845
Q16181	0.809	1.595	1.258	0.483	0.396	0.435	0.789	1.474	0.494	0.851	0.6	0.339	0.19	0.416	0.731	0.965	0.664	0.501	1.134	0.734	0.938	0.429	0.812	0.935	0.545	0.48	0.778	0.564	1.002	0.985	0.649	1.484	0.615	1.147	1.35	1.024	1.081	0.621	1.708	1.126	0.866	0.669	1.1	0.642	0.57	0.48	0.833	0.712	0.829
E7EX17	0.816	1.379	1.066	0.512	0.426	0.471	0.712	1.311	0.499	0.807	0.598	0.336	0.207	0.392	0.724	0.949	0.757	0.57	1.23	0.811	1.033	0.469	0.905	1.045	0.565	0.478	0.793	0.605	1.07	1.064	0.721	1.467	0.644	1.14	1.368	1.033	1.144	0.582	1.86	1.14	0.895	0.674	1.139	0.652	0.583	0.516	0.904	0.689	0.849
Q05655	0.831	1.687	1.291	0.517	0.39	0.416	0.746	1.522	0.675	1.176	0.841	0.345	0.224	0.521	0.999	1.305	0.796	0.553	1.23	0.861	1.044	0.555	0.931	1.058	0.536	0.506	0.805	0.531	0.956	0.93	0.643	1.493	0.592	1.077	1.293	1.039	1.152	0.673	1.49	1.171	0.871	0.667	1.119	0.663	0.636	0.521	0.89	0.827	0.823
P34931																																	0.517	0.957	1.17	1.118	1.065	0.639	1.41	0.961
F8VV59									0.519	1.039	0.667	0.465	0.255	0.474	0.81	1.136	0.83	0.6	1.225	0.976	1.094	0.439	1.139	1.29																	0.93	0.696	1.208	0.636	0.68	0.536	0.894	0.852	0.987
O14818	0.824	1.528	1.184	0.488	0.385	0.444	0.747	1.413	0.508	0.849	0.604	0.301	0.195	0.453	0.845	0.923	0.778	0.529	1.237	0.845	1.061	0.483	0.918	0.976	0.547	0.484	0.779	0.571	1.021	0.98	0.645	1.476	0.644	1.082	1.37	1.013	1.067	0.586	1.679	1.173	0.933	0.651	1.172	0.652	0.586	0.516	0.876	0.717	0.863
E7EUC7	0.861	1.611	1.24	0.519	0.42	0.426	0.752	1.496	0.588	1.007	0.717	0.344	0.223	0.487	0.925	1.14	0.839	0.596	1.295	0.891	1.128	0.537	0.985	1.073	0.539	0.506	0.792	0.579	1.01	1	0.68	1.491	0.639	1.074	1.343	1.032	1.077	0.638	1.592	1.133	0.857	0.689	1.12	0.686	0.626	0.552	0.958	0.763	0.86
P09543	0.832	1.643	1.316	0.487	0.391	0.418	0.745	1.576	0.556	1.034	0.747	0.355	0.216	0.456	0.856	1.145	0.788	0.54	1.21	0.835	1.034	0.509	0.887	1.018	0.579	0.498	0.812	0.584	1.032	1.001	0.667	1.542	0.61	1.106	1.323	1.048	1.12	0.67	1.666	1.224	0.907	0.674	1.105	0.637	0.574	0.537	0.906	0.748	0.844
P54920	0.899	1.572	1.265	0.554	0.416	0.438	0.775	1.462	0.595	1.065	0.803	0.367	0.225	0.519	0.913	1.212	0.963	0.662	1.505	1.053	1.313	0.663	1.138	1.279	0.591	0.519	0.827	0.599	1.068	1.07	0.703	1.557	0.613	1.126	1.435	1.102	1.134	0.643	1.743	1.238	0.918	0.65	1.135	0.677	0.615	0.522	0.878	0.811	0.907
G3V180	0.844	1.556	1.208	0.523	0.391	0.449	0.696	1.447	0.605	1.002	0.712	0.364	0.233	0.504	0.89	1.148	0.767	0.553	1.171	0.821	1.002	0.489	0.868	0.905	0.58	0.51	0.782	0.557	1.006	0.98	0.633	1.534	0.632	1.107	1.292	1.065	1.182	0.64	1.696	1.169	0.91	0.703	1.182	0.699	0.619	0.539	0.895	0.776	0.842
Q14012	0.869	1.7	1.314	0.513	0.406	0.473	0.781	1.551	0.55	0.942	0.671	0.335	0.208	0.483	0.866	1.042	0.782	0.543	1.191	0.827	0.997	0.49	0.903	0.933	0.558	0.501	0.784	0.553	0.917	0.875	0.585	1.445	0.652	1.076	1.376	1.041	1.029	0.593	1.438	1.118	0.844	0.665	1.19	0.702	0.632	0.501	0.85	0.755	0.865
O00629	0.801	1.427	1.1	0.501	0.385	0.419	0.64	1.263	0.577	1.035	0.732	0.357	0.225	0.447	0.826	1.141	0.856	0.605	1.269	0.909	1.194	0.571	0.987	1.156	0.556	0.52	0.798	0.554	0.961	0.945	0.622	1.504	0.648	1.1	1.264	0.972	1.047	0.592	1.602	1.1	0.921	0.71	1.173	0.655	0.623	0.548	0.989	0.755	0.804
P01023	0.8	1.641	1.226	0.483	0.398	0.426	0.704	1.413	0.619	1.092	0.728	0.346	0.23	0.449	0.928	1.17	0.825	0.623	1.294	0.864	1.157	0.523	1.013	1.063	0.585	0.523	0.816	0.627	1.082	1.039	0.72	1.542	0.642	1.082	1.264	1.016	1.182	0.667	1.529	1.171	0.922	0.687	1.177	0.676	0.649	0.536	0.939	0.831	0.864
P07858	0.847	1.58	1.253	0.491	0.394	0.422	0.73	1.393	0.587	1.034	0.716	0.33	0.207	0.486	0.893	1.105	0.756	0.507	1.262	0.854	1.011	0.437	0.839	0.999	0.538	0.473	0.806	0.546	0.962	0.894	0.62	1.461	0.625	1.05	1.32	0.979	1.05	0.605	1.544	1.091	0.853	0.64	1.13	0.631	0.566	0.485	0.825	0.686	0.828
O15371	0.865	1.65	1.323	0.516	0.416	0.458	0.754	1.533	0.589	0.975	0.714	0.357	0.219	0.446	0.868	1.11	0.799	0.579	1.316	0.865	1.128	0.543	0.947	1.043	0.559	0.521	0.784	0.551	1.019	0.957	0.643	1.466	0.625	1.092	1.459	1.038	1.139	0.666	1.744	1.271	0.906	0.695	1.124	0.651	0.611	0.534	0.921	0.77	0.858
Q13617	0.861	1.726	1.304	0.537	0.453	0.469	0.837	1.638	0.599	1.084	0.73	0.365	0.213	0.521	0.993	1.226	0.812	0.574	1.323	0.919	1.164	0.555	1.01	1.213	0.582	0.515	0.821	0.583	1.076	1.03	0.713	1.557	0.648	1.147	1.426	1.054	1.123	0.672	1.714	1.241	0.923	0.704	1.151	0.674	0.601	0.541	0.911	0.768	0.894
P78417	0.803	1.401	1.047	0.445	0.341	0.392	0.707	1.173	0.572	0.96	0.711	0.342	0.214	0.456	0.838	1.017	0.797	0.504	1.131	0.828	0.97	0.431	0.759	0.928	0.533	0.448	0.757	0.564	0.928	0.913	0.591	1.403	0.629	1.058	1.365	0.966	0.94	0.525	1.49	1.113	0.925	0.632	1.089	0.56	0.549	0.465	0.746	0.651	0.877
P23396	0.798	1.549	1.194	0.477	0.359	0.416	0.637	1.331	0.53	0.901	0.62	0.314	0.198	0.397	0.728	0.965	0.737	0.49	1.092	0.712	0.918	0.415	0.767	0.825	0.553	0.506	0.745	0.511	0.936	0.898	0.599	1.446	0.641	1.111	1.312	0.959	1.056	0.582	1.705	1.091	0.927	0.686	1.109	0.635	0.558	0.49	0.861	0.702	0.815
Q562R1	0.769	1.659	1.297	0.518	0.328	0.336	0.679	1.242																									0.466	1.111	1.264	0.879	0.953	0.61	1.344	0.808	0.599	0.695	1.201	0.599	0.531	0.608	0.693	0.593	0.551
Q14683	0.872	1.525	1.205	0.522	0.397	0.415	0.708	1.453	0.567	0.894	0.661	0.335	0.197	0.431	0.794	1.056	0.779	0.557	1.231	0.781	1.016	0.495	0.895	1.034	0.582	0.513	0.786	0.571	1.038	1.018	0.682	1.536	0.635	1.158	1.326	1.041	1.154	0.638	1.701	1.144	0.892	0.711	1.103	0.678	0.611	0.514	0.867	0.703	0.799
P19971	0.851	1.731	1.34	0.51	0.388	0.435	0.809	1.588	0.704	1.254	0.893	0.37	0.215	0.609	1.172	1.394	0.931	0.641	1.45	1.042	1.277	0.647	1.094	1.299	0.583	0.516	0.814	0.592	1.045	0.991	0.665	1.521	0.653	1.098	1.389	1.049	1.041	0.665	1.548	1.227	0.936	0.668	1.15	0.669	0.622	0.543	0.894	0.773	0.847
P46777	0.819	1.776	1.398	0.477	0.352	0.399	0.797	1.581	0.639	1.171	0.792	0.326	0.198	0.524	1.022	1.221	0.81	0.571	1.307	0.849	1.075	0.467	0.876	1.052	0.565	0.499	0.788	0.548	0.996	0.946	0.62	1.472	0.616	1.105	1.358	0.999	1.036	0.61	1.598	1.102	0.896	0.645	1.117	0.639	0.541	0.491	0.847	0.695	0.837
Q96AE4	0.858	1.588	1.185	0.47	0.359	0.373	0.733	1.4	0.635	1.071	0.771	0.357	0.218	0.593	0.951	1.146	0.885	0.644	1.353	0.951	1.222	0.535	1.074	1.255	0.556	0.472	0.738	0.578	1.04	0.99	0.662	1.461	0.672	0.998	1.352	0.969	1.046	0.576	1.648	1.15	0.915	0.644	1.141	0.614	0.59	0.519	0.814	0.68	0.867
Q8N1F7	0.83	1.615	1.237	0.514	0.392	0.435	0.694	1.476	0.526	0.898	0.631	0.32	0.198	0.399	0.73	0.95	0.816	0.585	1.305	0.893	1.12	0.52	0.928	1.151	0.54	0.494	0.784	0.541	0.892	0.863	0.598	1.369	0.615	1.029	1.336	0.987	1.069	0.579	1.608	1.218	0.823	0.616	1.055	0.571	0.576	0.466	0.788	0.713	0.801
Q96RQ9	0.865	1.6	1.217	0.53	0.405	0.444	0.683	1.464	0.564	0.966	0.668	0.336	0.216	0.449	0.81	1.043	0.788	0.569	1.245	0.889	1.157	0.542	0.943	1.013	0.565	0.531	0.834	0.611	0.995	0.99	0.674	1.532	0.669	1.109	1.355	1.015	1.079	0.65	1.606	1.171	0.892	0.672	1.103	0.644	0.603	0.529	0.889	0.741	0.852
Q08945	0.931	1.77	1.262	0.546	0.414	0.43	0.721	1.467	0.6	0.951	0.651	0.322	0.195	0.457	0.822	1.049	0.705	0.486	1.024	0.676	0.949	0.48	0.733	0.848	0.485	0.416	0.746	0.493	0.793	0.775	0.527	1.326	0.627	1.166	1.314	1.003	1.086	0.686	1.563	1.101	0.894	0.686	1.123	0.635	0.591	0.528	0.9	0.764	0.838
Q66K74	0.785	1.561	1.198	0.521	0.4	0.411	0.723	1.405	0.575	0.948	0.684	0.356	0.215	0.433	0.799	1.058	0.824	0.557	1.24	0.845	1.042	0.485	0.854	0.984	0.54	0.518	0.797	0.582	1.018	0.987	0.659	1.468	0.616	1.069	1.254	0.974	1.066	0.599	1.596	1.136	0.93	0.691	1.169	0.672	0.613	0.541	0.895	0.769	0.843
P08648	0.862	1.584	1.207	0.536	0.406	0.488	0.727	1.476	0.54	0.994	0.704	0.355	0.2	0.45	0.835	1.09	0.809	0.567	1.268	0.902	1.081	0.52	0.931	1.03	0.565	0.475	0.765	0.583	1.007	0.99	0.644	1.429	0.62	1.044	1.338	1.007	1.051	0.606	1.629	1.148	0.943	0.644	1.114	0.644	0.577	0.536	0.87	0.721	0.87
P00387	0.883	1.677	1.322	0.51	0.388	0.423	0.751	1.493	0.535	0.896	0.634	0.311	0.185	0.447	0.861	0.991	0.745	0.506	1.156	0.751	0.992	0.444	0.81	0.97	0.569	0.519	0.828	0.551	1.04	0.958	0.669	1.553	0.714	1.093	1.399	1.041	1.084	0.627	1.63	1.224	0.82	0.651	1.093	0.655	0.563	0.489	0.888	0.85	0.81
Q9BWD1	0.871	1.689	1.356	0.529	0.389	0.422	0.701	1.545	0.568	0.965	0.716	0.34	0.206	0.426	0.779	1.074	0.778	0.518	1.194	0.793	0.985	0.48	0.839	0.945	0.569	0.515	0.802	0.583	1.002	0.945	0.643	1.509	0.637	1.091	1.381	1.071	1.079	0.612	1.642	1.205	0.903	0.658	1.086	0.646	0.57	0.496	0.833	0.736	0.834
P23368	0.855	1.655	1.232	0.524	0.396	0.435	0.726	1.514	0.642	1.105	0.777	0.346	0.237	0.505	0.936	1.23	0.945	0.661	1.411	1.059	1.33	0.63	1.124	1.263	0.572	0.529	0.812	0.586	1.054	0.999	0.71	1.525	0.663	1.092	1.359	1.072	1.165	0.653	1.63	1.182	0.905	0.664	1.107	0.678	0.608	0.531	0.92	0.761	0.863
P42765	0.913	1.726	1.329	0.527	0.434	0.458	0.773	1.63	0.555	0.934	0.649	0.339	0.223	0.415	0.778	1.061	0.767	0.538	1.16	0.836	0.973	0.468	0.88	0.95	0.524	0.473	0.776	0.533	0.979	0.941	0.628	1.479	0.682	1.204	1.408	1.055	1.164	0.63	1.812	1.241	0.95	0.738	1.127	0.663	0.594	0.523	0.916	0.755	0.855
P31689	0.826	1.531	1.19	0.51	0.383	0.425	0.757	1.415	0.521	0.86	0.617	0.335	0.187	0.387	0.73	0.972	0.759	0.527	1.192	0.778	0.991	0.449	0.82	0.951	0.558	0.492	0.782	0.555	0.99	0.964	0.661	1.435	0.651	1.144	1.341	1.025	1.149	0.626	1.734	1.178	0.872	0.662	1.074	0.628	0.587	0.504	0.851	0.714	0.812
Q12907	0.869	1.739	1.384	0.532	0.382	0.458	0.766	1.534	0.625	1.136	0.784	0.351	0.212	0.526	1.068	1.204	0.79	0.534	1.262	0.808	1.072	0.457	0.869	1.048	0.566	0.503	0.813	0.543	1.009	0.953	0.632	1.509	0.62	1.093	1.372	0.988	1.036	0.609	1.646	1.123	0.884	0.662	1.136	0.655	0.553	0.491	0.843	0.73	0.846
P43490	0.87	1.845	1.401	0.496	0.366	0.423	0.727	1.546	0.604	1.137	0.78	0.369	0.229	0.533	0.958	1.24	0.846	0.541	1.32	0.951	1.193	0.548	0.985	1.158	0.583	0.528	0.791	0.575	1.055	0.984	0.682	1.56	0.659	1.07	1.402	1.055	1.043	0.66	1.537	1.32	0.94	0.69	1.133	0.689	0.664	0.549	0.956	0.828	0.858
Q16543	0.849	1.68	1.3	0.506	0.382	0.437	0.803	1.529	0.612	1.127	0.772	0.368	0.22	0.505	0.897	1.18	0.84	0.603	1.336	0.954	1.168	0.527	0.974	1.211	0.549	0.48	0.794	0.569	0.985	0.937	0.632	1.46	0.641	1.107	1.426	1.053	1.052	0.578	1.616	1.183	0.876	0.664	1.102	0.629	0.558	0.475	0.792	0.699	0.863
P51148	0.872	1.698	1.358	0.519	0.419	0.456	0.795	1.612	0.565	0.992	0.672	0.329	0.214	0.453	0.857	1.098	0.754	0.545	1.249	0.786	1.054	0.476	0.887	1.037	0.551	0.495	0.783	0.548	0.984	0.995	0.661	1.48	0.649	1.107	1.332	1.031	1.158	0.632	1.732	1.203	0.909	0.673	1.148	0.669	0.608	0.525	0.958	0.766	0.846
P32969	0.874	1.798	1.399	0.533	0.387	0.491	0.768	1.597	0.568	0.983	0.677	0.342	0.197	0.422	0.749	1.034	0.758	0.509	1.155	0.809	0.993	0.447	0.81	0.937	0.559	0.5	0.779	0.533	0.963	0.908	0.611	1.439	0.624	1.133	1.346	1.057	1.099	0.652	1.553	1.108	0.938	0.688	1.096	0.65	0.559	0.514	0.859	0.693	0.86
Q9Y4E8	0.847	1.637	1.237	0.547	0.397	0.461	0.677	1.417	0.622	0.969	0.707	0.34	0.208	0.457	0.802	1.075	0.867	0.624	1.284	0.929	1.052	0.56	0.972	0.958	0.574	0.524	0.844	0.58	0.969	1.032	0.652	1.598	0.648	1.065	1.264	1.012	1.011	0.614	1.588	1.069	0.907	0.676	1.113	0.609	0.564	0.484	0.783	0.728	0.82
Q9Y617	0.806	1.664	1.277	0.464	0.34	0.371	0.731	1.409	0.691	1.322	0.896	0.37	0.221	0.537	1.187	1.405	0.885	0.58	1.3	0.934	1.129	0.566	1.024	1.151	0.542	0.48	0.753	0.55	0.951	0.934	0.627	1.413	0.641	1.088	1.313	1.02	1.043	0.617	1.577	1.205	0.9	0.691	1.122	0.633	0.568	0.514	0.879	0.768	0.834
Q9H2U2	0.878	1.685	1.286	0.517	0.427	0.447	0.817	1.52	0.574	0.973	0.693	0.344	0.212	0.459	0.886	1.097	0.866	0.591	1.348	0.924	1.119	0.548	0.981	1.07	0.554	0.5	0.791	0.569	0.994	0.999	0.654	1.484	0.641	1.117	1.348	1.015	1.068	0.624	1.601	1.156	0.91	0.665	1.182	0.629	0.605	0.512	0.857	0.743	0.874
Q9H845	0.843	1.638	1.285	0.504	0.384	0.455	0.779	1.506	0.669	1.144	0.82	0.385	0.231	0.54	0.982	1.253	0.708	0.508	1.11	0.757	0.936	0.407	0.757	0.906	0.557	0.512	0.788	0.581	1.04	0.985	0.645	1.522	0.65	1.154	1.373	1.056	1.107	0.671	1.631	1.214	0.898	0.66	1.111	0.682	0.57	0.548	0.891	0.774	0.814
P50502	0.752	1.395	1.069	0.437	0.346	0.438	0.847	1.212	0.502	0.777	0.534	0.298	0.197	0.38	0.747	0.827	0.749	0.516	1.135	0.779	0.981	0.44	0.831	0.894	0.557	0.496	0.776	0.542	0.986	0.95	0.638	1.378	0.633	1.099	1.371	1.022	1.095	0.58	1.722	1.15	0.901	0.659	1.143	0.646	0.599	0.502	0.861	0.712	0.821
F8W809	0.844	1.663	1.273	0.487	0.383	0.455	0.708	1.465	0.605	1.038	0.748	0.344	0.208	0.458	0.898	1.178	0.748	0.511	1.147	0.79	0.978	0.449	0.829	0.933	0.566	0.507	0.787	0.547	1.013	0.965	0.632	1.458	0.664	1.107	1.326	1.036	1.135	0.669	1.676	1.165	0.917	0.684	1.068	0.607	0.569	0.487	0.846	0.711	0.816
P08575	0.859	1.632	1.257	0.525	0.397	0.421	0.794	1.517	0.543	0.886	0.621	0.334	0.216	0.471	0.814	1.013	0.782	0.602	1.28	0.903	1.12	0.499	0.987	1.08	0.562	0.499	0.81	0.583	1.069	1.004	0.696	1.541	0.69	1.127	1.402	1.087	1.177	0.646	1.689	1.254	0.879	0.681	1.13	0.661	0.634	0.532	0.934	0.765	0.888
P46977	0.802	1.609	1.286	0.49	0.359	0.411	0.753	1.414	0.556	1.014	0.702	0.321	0.192	0.475	0.908	1.082	0.764	0.536	1.248	0.857	1.02	0.48	0.893	0.987	0.532	0.493	0.782	0.558	0.94	0.913	0.628	1.407	0.59	1.062	1.318	1.03	1.054	0.631	1.57	1.103	0.87	0.652	1.114	0.686	0.59	0.513	0.868	0.755	0.835
P12236	0.813	1.55	1.237	0.482	0.364	0.412	0.684	1.385	0.577	0.963	0.689	0.315	0.221	0.444	0.842	1.086	0.726	0.482	1.15	0.752	0.93	0.426	0.733	0.918	0.539	0.493	0.779	0.526	0.935	0.9	0.591	1.391	0.63	1.055	1.306	0.95	0.984	0.606	1.508	1.114	0.881	0.654	1.101	0.644	0.572	0.488	0.864	0.748	0.784
Q9BT78	0.883	1.595	1.216	0.525	0.43	0.428	0.781	1.444	0.628	1.109	0.81	0.347	0.213	0.547	1.02	1.189	0.847	0.574	1.252	0.911	1.088	0.538	0.962	1.001	0.58	0.503	0.786	0.618	1.026	1.024	0.67	1.498	0.671	1.085	1.365	1.083	1.069	0.645	1.54	1.191	0.945	0.696	1.226	0.73	0.685	0.615	1.035	0.838	0.917
Q5T0I0	0.914	1.776	1.36	0.474	0.348	0.367	0.737	1.593	0.692	1.358	0.895	0.35	0.206	0.538	0.909	1.289	0.723	0.472	1.122	0.802	0.923	0.34	0.586	0.924	0.588	0.509	0.875	0.55	0.996	0.916	0.595	1.567	0.654	1.096	1.359	0.977	1.035	0.602	1.543	1.137	0.874	0.639	1.049	0.57	0.543	0.464	0.743	0.671	0.755
Q9UGP8	0.852	1.668	1.311	0.531	0.385	0.423	0.73	1.521	0.582	1.049	0.733	0.343	0.21	0.463	0.902	1.168	0.81	0.554	1.308	0.874	1.115	0.515	0.912	1.106	0.567	0.517	0.829	0.578	1.016	0.986	0.666	1.535	0.609	1.078	1.384	0.996	1.01	0.625	1.559	1.158	0.895	0.669	1.117	0.667	0.577	0.5	0.874	0.732	0.829
Q9HB71	0.851	1.705	1.407	0.512	0.358	0.406	0.786	1.515	0.566	1.021	0.684	0.315	0.189	0.45	0.904	1.053	0.745	0.526	1.252	0.821	1.002	0.424	0.81	1.004	0.536	0.489	0.778	0.528	0.91	0.866	0.57	1.394	0.613	1.08	1.347	1.018	1.022	0.595	1.593	1.139	0.858	0.647	1.118	0.598	0.527	0.457	0.784	0.709	0.878
Q9NSD9	0.828	1.642	1.231	0.486	0.363	0.386	0.672	1.434	0.654	1.161	0.779	0.332	0.222	0.514	0.986	1.26	0.863	0.583	1.307	0.915	1.104	0.557	0.983	1.041	0.535	0.464	0.751	0.547	0.925	0.897	0.605	1.408	0.642	1.076	1.323	1.031	1.078	0.612	1.589	1.144	0.902	0.664	1.125	0.661	0.585	0.515	0.895	0.731	0.827
O00232	0.817	1.653	1.293	0.488	0.368	0.401	0.757	1.521	0.653	1.127	0.769	0.331	0.228	0.562	0.997	1.212	0.775	0.516	1.26	0.871	1.053	0.49	0.846	1.038	0.515	0.473	0.801	0.539	0.927	0.886	0.599	1.451	0.627	1.074	1.405	1.028	1.01	0.622	1.485	1.205	0.884	0.653	1.088	0.627	0.558	0.506	0.808	0.738	0.839
A0A2R8Y5V9	0.921	1.773	1.444	0.585	0.451	0.499	0.868	1.607	0.573	0.958	0.661	0.308	0.211	0.466	0.824	1.031	0.803	0.581	1.09	0.821	0.972	0.435	0.771	0.728	0.498	0.524	0.776	0.591	0.924	0.883	0.51	1.448	0.633	1.04	1.235	1.036	1.048	0.565	1.565	1.082	0.93	0.597	1.211	0.642	0.604	0.469	0.776	0.705	0.97
O60749	0.845	1.61	1.233	0.49	0.375	0.433	0.719	1.416	0.613	1.069	0.729	0.348	0.216	0.456	0.888	1.14	0.784	0.52	1.175	0.821	0.985	0.464	0.799	0.957	0.559	0.526	0.804	0.565	0.953	0.939	0.648	1.485	0.621	1.101	1.353	1.032	1.091	0.624	1.656	1.169	0.921	0.683	1.082	0.628	0.581	0.496	0.845	0.727	0.827
Q93009	0.89	1.614	1.308	0.521	0.407	0.39	0.752	1.506	0.655	1.122	0.83	0.341	0.242	0.491	0.979	1.334	0.87	0.587	1.377	0.922	1.153	0.599	0.989	1.066	0.537	0.499	0.789	0.544	0.961	0.903	0.645	1.457	0.582	0.997	1.214	0.942	0.982	0.636	1.366	1.076	0.885	0.658	1.1	0.653	0.58	0.561	0.904	0.723	0.882
P20591	0.856	1.698	1.299	0.533	0.405	0.419	0.711	1.533	0.597	0.992	0.759	0.363	0.215	0.448	0.833	1.136	0.819	0.604	1.279	0.922	1.095	0.585	0.927	1.116	0.602	0.499	0.801	0.608	0.992	0.987	0.61	1.495	0.633	1.082	1.274	1.065	1.098	0.616	1.687	1.204	0.907	0.629	1.113	0.645	0.598	0.506	0.796	0.733	0.808
P49589	0.871	1.805	1.384	0.538	0.436	0.487	0.747	1.645	0.537	0.945	0.677	0.336	0.217	0.452	0.831	1.079	0.749	0.485	1.103	0.75	0.949	0.459	0.812	0.888	0.576	0.519	0.827	0.596	1.033	0.986	0.65	1.545	0.653	1.13	1.331	1.069	1.077	0.667	1.555	1.174	0.934	0.655	1.111	0.679	0.603	0.559	0.906	0.762	0.876
F8W726	0.755	1.224	0.968	0.511	0.418	0.522	0.636	1.173	0.456	0.676	0.467	0.334	0.202	0.366	0.649	0.776	0.717	0.506	1.154	0.793	0.927	0.452	0.832	0.803	0.531	0.48	0.767	0.579	0.989	1.013	0.679	1.38	0.645	1.037	1.279	0.942	1.072	0.596	1.628	1.075	0.921	0.685	1.206	0.639	0.587	0.509	0.846	0.671	0.917
P61586	0.865	1.751	1.374	0.525	0.378	0.441	0.724	1.505	0.576	1.003	0.662	0.327	0.202	0.459	0.905	1.026	0.681	0.447	1.092	0.684	0.878	0.364	0.68	0.861	0.549	0.482	0.792	0.513	0.983	0.9	0.597	1.443	0.61	1.105	1.332	0.966	1.071	0.567	1.59	1.172	0.883	0.66	1.116	0.611	0.558	0.465	0.829	0.689	0.821
P60900	0.871	1.722	1.358	0.531	0.382	0.408	0.748	1.494	0.59	0.982	0.703	0.337	0.203	0.473	0.856	1.037	0.81	0.575	1.317	0.894	1.091	0.514	0.949	1.067	0.584	0.517	0.791	0.589	1.047	0.953	0.651	1.386	0.696	1.077	1.344	1.022	1.062	0.641	1.518	1.165	0.902	0.694	1.097	0.647	0.569	0.474	0.825	0.714	0.828
Q9ULV4	0.841	1.468	1.211	0.525	0.383	0.397	0.71	1.42	0.529	0.908	0.656	0.325	0.202	0.411	0.773	1.058	0.755	0.523	1.219	0.765	0.944	0.458	0.815	0.926	0.521	0.466	0.742	0.539	0.902	0.916	0.602	1.367	0.603	1.114	1.255	0.981	1.127	0.618	1.684	1.095	0.916	0.687	1.127	0.632	0.587	0.51	0.887	0.717	0.765
Q99733	0.859	1.692	1.331	0.518	0.408	0.426	0.789	1.541	0.63	1.065	0.775	0.364	0.216	0.549	0.965	1.188	0.799	0.564	1.254	0.861	1.069	0.501	0.916	1.055	0.57	0.506	0.801	0.597	1.071	1.015	0.665	1.528	0.636	1.105	1.37	1.087	1.12	0.641	1.66	1.208	0.893	0.663	1.094	0.65	0.587	0.495	0.833	0.725	0.825
P62879	0.853	1.665	1.376	0.499	0.351	0.41	0.707	1.426	0.487	0.746	0.537	0.299	0.197	0.45	0.695	0.831	0.721	0.486	1.029	0.687	0.85	0.39	0.712	0.714	0.471	0.473	0.702	0.482	0.924	0.881	0.561	1.351	0.686	1.087	1.282	1.006	1.03	0.584	1.697	1.012	1.044	0.761	1.197	0.622	0.577	0.515	0.933	0.698	0.829
P20042	0.85	1.591	1.291	0.55	0.408	0.425	0.745	1.524	0.629	1.072	0.756	0.354	0.209	0.492	0.956	1.204	0.734	0.517	1.204	0.81	0.961	0.422	0.827	0.983	0.56	0.51	0.807	0.579	0.985	0.946	0.63	1.488	0.634	1.188	1.411	1.038	1.147	0.608	1.698	1.189	0.896	0.649	1.15	0.67	0.611	0.527	0.91	0.756	0.859
Q96HE7	0.899	1.729	1.398	0.548	0.388	0.4	0.772	1.514	0.671	1.178	0.804	0.359	0.217	0.523	1.108	1.218	0.835	0.574	1.269	0.895	1.055	0.554	0.962	0.994	0.542	0.458	0.786	0.549	0.939	0.92	0.64	1.433	0.617	1.113	1.43	1.076	1.086	0.605	1.615	1.172	0.923	0.643	1.139	0.62	0.607	0.537	0.852	0.73	0.854
P61106	0.876	1.65	1.28	0.521	0.406	0.424	0.778	1.503	0.571	0.968	0.715	0.334	0.207	0.465	0.856	1.078	0.795	0.558	1.243	0.851	1.071	0.507	0.92	1.029	0.548	0.482	0.773	0.565	0.98	0.944	0.631	1.407	0.659	1.076	1.313	1.006	1.064	0.606	1.606	1.153	0.901	0.647	1.12	0.639	0.575	0.49	0.859	0.725	0.872
P42167	0.882	1.584	1.27	0.582	0.432	0.456	0.769	1.504	0.424	0.689	0.514	0.317	0.183	0.358	0.585	0.748	0.671	0.506	1.142	0.755	0.94	0.418	0.831	0.891	0.581	0.518	0.806	0.63	1.097	1.036	0.733	1.472	0.617	1.062	1.362	1.022	1.074	0.596	1.747	1.126	0.898	0.683	1.132	0.656	0.608	0.503	0.853	0.726	0.85
Q14315									0.488	0.774	0.541	0.267	0.235	0.31	0.628	0.858	0.995	0.651	1.525	1.023	1.405	0.66	1.196	1.49	0.55	0.47	0.708	0.48	0.932	0.916	0.628	1.444									1.118	0.659	1.092	0.653	0.662	0.562	1.148	0.662
Q5SX86	0.749	1.736	1.265	0.549	0.221	0.07	0.731	1.142																																									0.781
Q9NU22	0.906	1.67	1.276	0.611	0.436	0.461	0.788	1.462	0.563	0.969	0.658	0.362	0.218	0.452	0.807	1.078	0.783	0.607	1.488	0.96	1.209	0.525	1.029	1.169	0.579	0.535	0.816	0.773	1.006	1.042	0.684	1.474	0.5	1.078	1.171	1.019	0.934	0.507	1.324	1.113	0.685	0.535	0.892	0.465	0.478	0.413	0.633	0.602	0.796
P13861	0.904	1.628	1.254	0.56	0.461	0.462	0.773	1.564	0.561	0.897	0.638	0.342	0.216	0.463	0.802	1.009	0.784	0.567	1.26	0.86	1.091	0.49	0.918	1.101	0.568	0.52	0.8	0.57	1.057	0.995	0.684	1.514	0.675	1.139	1.361	1.058	1.121	0.663	1.673	1.19	0.888	0.684	1.139	0.686	0.629	0.537	0.932	0.748	0.869
Q07954	0.855	1.557	1.128	0.637	0.453	0.53	0.779	1.441	0.573	0.939	0.687	0.309	0.176	0.456	0.994	1.105	0.797	0.557	1.3	0.905	1.161	0.539	1.009	0.99	0.608	0.557	0.824	0.59	1.124	1.058	0.746	1.608	0.667	1.104	1.279	1.134	1.127	0.687	1.706	1.205	0.919	0.668	1.106	0.661	0.58	0.545	0.916	0.728	0.848
Q9Y3I0	0.844	1.598	1.243	0.471	0.367	0.401	0.729	1.391	0.554	0.966	0.719	0.35	0.203	0.473	0.807	1.056	0.816	0.54	1.232	0.895	1.079	0.517	0.897	1.028	0.562	0.478	0.782	0.586	1.013	0.946	0.632	1.523	0.664	1.135	1.405	1.043	1.104	0.635	1.641	1.203	0.921	0.658	1.136	0.62	0.597	0.536	0.866	0.761	0.88
A0A0C4DG89																																	0.848	1.516	1.495	1.328	1.464	0.859	2.206	1.442									0.894
P11172	0.848	1.639	1.316	0.504	0.355	0.378	0.71	1.419	0.648	1.113	0.761	0.356	0.238	0.441	0.879	1.193	0.83	0.561	1.237	0.885	1.029	0.509	0.901	0.982	0.549	0.525	0.791	0.558	0.946	0.911	0.662	1.535	0.661	1.08	1.281	0.967	1.064	0.634	1.565	1.231	0.886	0.653	1.071	0.609	0.554	0.475	0.804	0.746	0.81
P42858	0.855	1.492	1.242	0.529	0.402	0.388	0.835	1.568	0.691	1.136	0.796	0.338	0.258	0.58	1.044	1.313	1.22	0.85	1.851	1.427	1.665	1.03	1.622	1.696	0.55	0.581	0.797	0.575	1.11	1.003	0.707	1.471	0.643	1.086	1.281	1.036	1.074	0.717	1.507	1.239	0.922	0.706	1.164	0.754	0.673	0.615	0.965	0.858	0.85
P55263	0.826	1.605	1.259	0.513	0.371	0.429	0.699	1.419	0.548	0.95	0.653	0.338	0.202	0.371	0.77	1.015	0.73	0.487	1.124	0.793	0.904	0.449	0.777	0.868	0.545	0.458	0.753	0.538	0.934	0.866	0.606	1.407	0.642	1.112	1.309	1.014	1.064	0.604	1.673	1.097	0.89	0.655	1.097	0.608	0.552	0.452	0.792	0.69	0.833
O00764	0.85	1.52	1.146	0.481	0.394	0.44	0.729	1.388	0.531	0.869	0.599	0.33	0.196	0.418	0.758	0.959	0.754	0.522	1.202	0.81	1.002	0.477	0.83	0.984	0.599	0.518	0.804	0.593	1.037	1.043	0.673	1.54	0.678	1.159	1.37	1.106	1.191	0.71	1.812	1.197	0.918	0.701	1.153	0.647	0.613	0.516	0.898	0.758	0.854
Q8WVM8	0.867	1.653	1.267	0.507	0.363	0.399	0.73	1.425	0.687	1.206	0.849	0.385	0.249	0.516	1.002	1.365	0.899	0.622	1.377	1.008	1.186	0.599	1.061	1.109	0.559	0.5	0.82	0.598	0.994	0.971	0.676	1.538	0.642	1.048	1.33	0.986	1.005	0.584	1.493	1.166	0.91	0.66	1.117	0.63	0.583	0.515	0.895	0.794	0.863
Q9UKW4	0.853	1.629	1.251	0.519	0.393	0.411	0.728	1.492	0.6	1.09	0.766	0.34	0.213	0.484	0.999	1.23	0.71	0.516	1.243	0.8	0.993	0.44	0.824	0.95	0.578	0.505	0.808	0.602	1.042	1.061	0.734	1.47	0.645	1.131	1.416	1.111	1.211	0.692	1.846	1.167	0.866	0.676	1.032	0.657	0.615	0.553	0.939	0.783	0.778
P67936	0.738	1.353	1.011	0.437	0.349	0.392	0.81	1.211	0.513	0.816	0.592	0.306	0.188	0.403	0.799	0.901	0.712	0.506	1.151	0.729	0.96	0.379	0.791	0.93	0.538	0.454	0.768	0.554	0.97	0.926	0.62	1.399	0.651	1.115	1.446	1.06	1.202	0.583	1.896	1.226	0.901	0.639	1.15	0.63	0.57	0.483	0.829	0.68	0.869
Q8N392	0.882	1.618	1.271	0.486	0.402	0.419	0.775	1.513	0.563	0.962	0.706	0.35	0.214	0.488	0.874	1.135	0.907	0.642	1.468	0.986	1.253	0.609	1.073	1.271	0.566	0.521	0.817	0.597	1.069	1.034	0.704	1.545	0.659	1.18	1.405	1.028	1.164	0.619	1.793	1.198	0.963	0.708	1.145	0.679	0.665	0.544	0.968	0.787	0.875
P08865	0.869	1.592	1.236	0.504	0.403	0.461	0.798	1.439	0.565	0.941	0.673	0.352	0.211	0.442	0.824	1.021	0.803	0.554	1.173	0.828	1	0.492	0.878	0.975	0.561	0.485	0.781	0.536	0.972	0.913	0.609	1.455	0.652	1.116	1.355	1.032	1.052	0.612	1.602	1.109	0.917	0.655	1.127	0.636	0.586	0.509	0.877	0.744	0.9
O95782	0.874	1.627	1.207	0.528	0.373	0.392	0.692	1.34	0.84	1.435	1.018	0.382	0.257	0.599	1.264	1.642	0.952	0.704	1.466	1.083	1.297	0.718	1.137	1.271	0.584	0.491	0.817	0.561	0.977	0.921	0.63	1.432	0.64	1.142	1.451	1.14	1.179	0.682	1.54	1.258	0.927	0.668	1.064	0.687	0.636	0.551	0.913	0.747	0.838
Q99497	0.814	1.701	1.29	0.503	0.398	0.435	0.77	1.481	0.561	0.926	0.606	0.309	0.215	0.398	0.849	0.937	0.661	0.465	1.045	0.659	0.874	0.391	0.746	0.786	0.541	0.512	0.773	0.53	0.993	0.943	0.644	1.36	0.604	1.051	1.278	1.003	1.101	0.648	1.662	1.083	0.875	0.711	1.146	0.693	0.585	0.486	0.918	0.736	0.725
K7ER00	0.878	1.593	1.264	0.503	0.411	0.393	0.75	1.499	0.527	0.883	0.63	0.323	0.203	0.507	0.842	1.009	0.744	0.563	1.22	0.776	0.993	0.449	0.861	0.956	0.611	0.509	0.882	0.612	1.082	1.053	0.711	1.583	0.619	1.16	1.392	1.051	1.186	0.636	1.809	1.141	0.892	0.678	1.134	0.661	0.6	0.556	0.915	0.738	0.856
G8JLA2	0.794	1.329	1.092	0.693	0.625	0.787	0.904	1.444	0.501	0.541	0.429	0.389	0.203	0.397	0.543	0.844	0.718	0.509	1.112	0.745	1.112	0.284	0.688	0.823									0.569	1.475	1.955	1.1	1.125	0.62	1.957	1.211	0.894	0.664	1.093	0.676	0.531	0.455	0.903	0.919
H0YA96	0.761	1.37	1.096	0.373	0.298	0.249	0.747	1.132	0.744	1.191	0.749	0.293	0.163	0.682	1.308	1.283	1.392	0.809	2.162	1.448	1.935	0.923	1.852	1.997	0.604	0.436	0.667	0.697	1.148	1.009	0.584	1.362	0.679	0.929	1.13	1.025	1.048	0.626	1.284	0.964	0.868	0.565	0.993	0.575	0.54	0.532	0.757	0.596	0.895
P08754	0.831	1.425	1.14	0.52	0.393	0.441	0.752	1.272	0.473	0.782	0.602	0.344	0.194	0.426	0.665	0.844	0.725	0.51	1.138	0.789	0.918	0.435	0.841	0.898	0.59	0.508	0.739	0.574	1.004	0.984	0.694	1.444	0.654	1.102	1.382	1.02	1.063	0.62	1.666	1.129	0.922	0.676	1.134	0.664	0.617	0.537	0.909	0.728	0.853
Q27J81	0.9	1.691	1.372	0.532	0.397	0.424	0.824	1.614	0.497	0.839	0.618	0.333	0.217	0.467	0.768	0.989	0.794	0.531	1.165	0.891	1.004	0.533	0.868	0.998	0.582	0.537	0.789	0.56	1.013	0.994	0.664	1.472	0.635	1.074	1.381	1.096	1.119	0.623	1.594	1.211	0.849	0.661	1.107	0.678	0.62	0.549	0.865	0.753	0.872
Q14847	0.797	1.47	1.114	0.481	0.368	0.42	0.697	1.278	0.53	0.84	0.621	0.331	0.195	0.448	0.734	0.884	0.738	0.533	1.176	0.789	1.018	0.443	0.849	0.996	0.552	0.49	0.748	0.572	1.009	0.977	0.636	1.336	0.666	1.036	1.348	0.996	1.055	0.582	1.63	1.124	0.911	0.693	1.088	0.634	0.581	0.467	0.827	0.663	0.814
Q96RP9	0.788	1.499	1.185	0.503	0.417	0.445	0.775	1.39	0.629	1.091	0.802	0.362	0.243	0.493	0.959	1.263	0.838	0.602	1.354	0.889	1.141	0.592	0.993	1.162	0.574	0.497	0.762	0.567	1.005	0.958	0.663	1.495	0.665	1.111	1.279	1.022	1.142	0.687	1.624	1.189	0.918	0.705	1.15	0.689	0.651	0.562	1.005	0.816	0.861
Q9H0D6	0.877	1.699	1.408	0.546	0.404	0.395	0.789	1.648	0.559	0.937	0.665	0.368	0.216	0.468	0.795	1.084	0.845	0.609	1.329	0.946	1.204	0.574	1.029	1.142	0.612	0.534	0.821	0.601	1.123	1.056	0.731	1.572	0.68	1.158	1.395	1.045	1.122	0.638	1.707	1.282	0.889	0.673	1.166	0.71	0.654	0.572	0.993	0.796	0.83
Q15019	0.903	1.793	1.419	0.536	0.427	0.48	0.766	1.635	0.608	1.08	0.766	0.36	0.232	0.512	1.002	1.212	0.761	0.527	1.152	0.798	1.02	0.488	0.831	0.971	0.598	0.505	0.783	0.553	0.997	0.962	0.643	1.517	0.668	1.129	1.362	1.04	1.127	0.646	1.695	1.13	0.933	0.682	1.154	0.682	0.591	0.533	0.892	0.77	0.86
P29692	0.9	1.701	1.353	0.558	0.405	0.464	0.75	1.548	0.63	1.079	0.747	0.349	0.206	0.512	0.944	1.209	0.765	0.539	1.27	0.838	1.066	0.494	0.901	1.006	0.567	0.473	0.827	0.562	1.009	0.988	0.657	1.53	0.624	1.137	1.419	1.077	1.15	0.664	1.812	1.26	0.927	0.669	1.161	0.691	0.588	0.51	0.91	0.752	0.809
P42166	1.032	1.603	1.133	0.42	0.375	0.411	0.781	1.638	0.683	1.282	0.838	0.432	0.232	0.413	1.027	1.368	1.026	0.787	1.647	1.332	1.67	0.743	1.455	1.387	0.511	0.409	0.78	0.628	0.841	0.983	0.736	1.338	0.644	1.142	1.382	1.2	1.216	0.833	1.662	1.075
O14950	0.849	1.61	1.247	0.418	0.349	0.419	0.858	1.442	0.559	0.97	0.754	0.35	0.208	0.54	0.976	1.059	0.854	0.528	1.228	0.95	1.122	0.489	0.922	1.114	0.554	0.443	0.762	0.579	1.014	0.955	0.621	1.41	0.634	1.079	1.394	1.058	1.003	0.535	1.538	1.194	0.937	0.621	1.155	0.564	0.579	0.512	0.8	0.693	0.931
P09211	0.855	1.682	1.352	0.499	0.361	0.404	0.709	1.473	0.598	1.06	0.719	0.318	0.197	0.443	0.831	1.133	0.801	0.543	1.226	0.843	1.002	0.458	0.835	0.967	0.55	0.487	0.778	0.522	0.918	0.886	0.589	1.42	0.665	1.116	1.356	1.006	1.026	0.637	1.548	1.137	0.942	0.704	1.133	0.663	0.581	0.492	0.847	0.738	0.826
Q9Y5M8	0.876	1.583	1.224	0.524	0.39	0.431	0.725	1.413	0.637	1.147	0.852	0.361	0.226	0.553	0.979	1.264	0.827	0.555	1.202	0.9	1.061	0.533	0.885	0.999	0.572	0.488	0.788	0.585	0.974	0.952	0.634	1.463	0.649	1.074	1.307	1.001	1.008	0.544	1.525	1.145	0.938	0.621	1.118	0.543	0.57	0.512	0.781	0.686	0.912
P10768	0.842	1.555	1.181	0.519	0.4	0.435	0.703	1.406	0.564	0.929	0.701	0.352	0.228	0.431	0.812	1.046	0.712	0.487	1.081	0.711	0.917	0.408	0.718	0.845	0.502	0.458	0.75	0.472	0.825	0.783	0.533	1.36	0.615	1.078	1.275	0.944	1.019	0.632	1.516	1.14	0.9	0.641	1.066	0.618	0.527	0.479	0.751	0.67	0.845
Q13867	0.874	1.715	1.363	0.519	0.353	0.383	0.716	1.481	0.649	1.125	0.818	0.355	0.216	0.506	0.997	1.25	0.868	0.573	1.333	0.94	1.122	0.542	0.954	1.143	0.565	0.496	0.807	0.578	1.033	0.954	0.643	1.523	0.613	1.097	1.34	1.049	1.086	0.633	1.617	1.172	0.87	0.654	1.111	0.664	0.599	0.501	0.9	0.749	0.823
A0A3F2YNW8	0.806	1.641	1.255	0.529	0.403	0.424	0.723	1.519	0.523	0.857	0.614	0.33	0.189	0.419	0.74	0.964	0.747	0.567	1.295	0.877	1.067	0.485	0.914	1.025	0.579	0.52	0.797	0.576	1.064	1.033	0.721	1.457	0.633	1.142	1.384	1.058	1.115	0.671	1.68	1.164	0.856	0.691	1.091	0.696	0.609	0.536	0.956	0.771	0.803
P49257	0.831	1.536	1.245	0.517	0.396	0.444	0.782	1.447	0.536	0.888	0.62	0.343	0.197	0.486	0.829	0.996	0.675	0.492	1.136	0.72	0.905	0.389	0.779	0.916	0.572	0.484	0.791	0.568	1.017	0.974	0.649	1.474	0.627	1.119	1.348	1.041	1.132	0.605	1.77	1.136	0.879	0.688	1.135	0.671	0.608	0.51	0.925	0.768	0.849
O60264	0.843	1.663	1.244	0.503	0.375	0.373	0.731	1.531	0.607	0.951	0.673	0.337	0.23	0.467	0.851	1.069	0.824	0.586	1.31	0.877	1.055	0.562	0.979	1.06	0.579	0.502	0.791	0.588	0.956	0.893	0.621	1.49	0.621	1.071	1.301	1.038	1.086	0.664	1.506	1.096	0.966	0.675	1.164	0.712	0.651	0.561	0.878	0.742	0.893
Q5T4U5	0.834	1.62	1.285	0.492	0.371	0.399	0.761	1.486	0.596	1.002	0.66	0.327	0.203	0.455	0.903	1.068	0.718	0.497	1.11	0.735	0.891	0.42	0.729	0.88	0.544	0.508	0.758	0.546	1.01	0.94	0.638	1.411	0.641	1.109	1.35	1	1.093	0.613	1.659	1.147	0.873	0.672	1.104	0.668	0.564	0.501	0.866	0.744	0.83
P30419	0.807	1.754	1.369	0.483	0.37	0.399	0.755	1.601	0.537	0.894	0.624	0.329	0.188	0.442	0.783	0.99	0.797	0.555	1.29	0.88	1.093	0.557	0.942	1.185	0.573	0.493	0.811	0.575	1.015	0.997	0.653	1.499	0.627	1.104	1.379	0.99	1.077	0.621	1.68	1.139	0.889	0.68	1.158	0.646	0.634	0.543	0.874	0.787	0.816
P62424	0.849	1.691	1.271	0.53	0.417	0.462	0.705	1.507	0.513	0.845	0.595	0.312	0.197	0.357	0.728	0.92	0.734	0.52	1.184	0.75	0.99	0.439	0.825	0.942	0.586	0.514	0.795	0.553	1.026	0.976	0.651	1.513	0.631	1.111	1.302	0.978	1.111	0.615	1.701	1.078	0.896	0.675	1.142	0.636	0.577	0.509	0.893	0.723	0.833
P83111	0.865	1.466	1.136	0.491	0.397	0.442	0.765	1.455	0.56	0.816	0.548	0.295	0.199	0.39	0.841	0.967	0.902	0.557	1.219	0.864	1.131	0.53	0.996	1.064	0.59	0.457	0.701	0.559	0.984	0.935	0.653	1.524	0.633	1.081	1.285	1.052	1.056	0.637	1.411	1.08	0.915	0.677	1.087	0.667	0.604	0.515	0.813	0.699	0.904
Q7L014	0.844	1.715	1.33	0.523	0.402	0.437	0.699	1.517	0.594	1.121	0.758	0.337	0.219	0.472	0.912	1.172	0.819	0.582	1.253	0.864	1.067	0.519	0.898	1.063	0.563	0.54	0.811	0.598	1.014	0.978	0.656	1.549	0.643	1.092	1.309	0.976	1.042	0.632	1.674	1.122	0.906	0.666	1.131	0.645	0.559	0.512	0.868	0.757	0.809
Q9BZZ5	0.871	1.55	1.19	0.51	0.415	0.499	0.777	1.515	0.53	0.919	0.707	0.355	0.222	0.44	0.834	1.011	0.834	0.53	1.204	0.893	1.076	0.495	0.886	1.011	0.561	0.505	0.796	0.592	0.998	1.027	0.666	1.524	0.647	1.088	1.296	0.999	1.074	0.566	1.626	1.131	0.931	0.596	1.133	0.584	0.598	0.53	0.827	0.668	0.983
P18124	0.837	1.692	1.297	0.504	0.366	0.429	0.651	1.468	0.568	0.98	0.659	0.314	0.189	0.384	0.777	1.033	0.778	0.522	1.189	0.771	0.975	0.428	0.813	0.875	0.54	0.496	0.758	0.512	0.914	0.874	0.58	1.441	0.614	1.077	1.294	0.927	1.004	0.575	1.519	1.061	0.93	0.66	1.094	0.594	0.53	0.474	0.793	0.677	0.775
P23786	0.856	1.669	1.276	0.509	0.417	0.463	0.716	1.531	0.524	0.887	0.651	0.336	0.21	0.466	0.888	1.037	0.751	0.547	1.165	0.819	1.031	0.466	0.795	0.981	0.545	0.508	0.823	0.591	1.004	0.951	0.638	1.515	0.664	1.115	1.369	1.059	1.094	0.623	1.618	1.149	0.921	0.675	1.176	0.694	0.623	0.572	0.901	0.761	0.848
Q9UNF0	0.844	1.575	1.233	0.521	0.404	0.46	0.733	1.429	0.559	0.927	0.689	0.346	0.209	0.463	0.813	1.046	0.748	0.519	1.178	0.811	0.999	0.452	0.835	0.984	0.558	0.48	0.783	0.57	0.967	0.937	0.613	1.45	0.621	1.111	1.348	1.024	1.083	0.599	1.714	1.152	0.898	0.646	1.082	0.627	0.572	0.492	0.79	0.69	0.843
P08567	0.797	1.586	1.287	0.496	0.348	0.42	0.658	1.424	0.552	0.949	0.649	0.309	0.198	0.429	0.81	1.015	0.767	0.501	1.205	0.787	0.96	0.458	0.781	0.942	0.543	0.493	0.778	0.535	0.893	0.866	0.594	1.373	0.622	1.078	1.329	1.001	0.968	0.565	1.498	1.095	0.909	0.695	1.125	0.64	0.541	0.478	0.848	0.703	0.795
P31153	0.824	1.537	1.198	0.483	0.366	0.397	0.702	1.371	0.562	0.944	0.663	0.332	0.206	0.41	0.799	1.034	0.818	0.574	1.316	0.878	1.106	0.522	0.964	1.059	0.551	0.48	0.777	0.546	0.97	0.92	0.631	1.461	0.649	1.121	1.338	1.02	1.082	0.608	1.657	1.159	0.887	0.666	1.1	0.648	0.564	0.483	0.847	0.737	0.836
Q92922	0.84	1.63	1.291	0.525	0.441	0.465	0.781	1.585	0.53	0.91	0.677	0.326	0.206	0.424	0.745	1.044	0.728	0.52	1.131	0.782	0.972	0.418	0.798	0.94	0.524	0.482	0.796	0.553	0.936	0.946	0.577	1.515	0.593	1.057	1.29	1.031	1.044	0.6	1.64	1.123	0.895	0.678	1.1	0.616	0.498	0.439	0.787	0.696	0.906
P46060	0.872	1.601	1.243	0.569	0.435	0.446	0.729	1.474	0.69	1.23	0.888	0.363	0.264	0.54	1.041	1.403	0.978	0.608	1.336	0.946	1.215	0.664	1.054	1.22	0.574	0.522	0.758	0.622	1.117	1.076	0.737	1.542	0.687	1.121	1.392	1.086	1.15	0.661	1.661	1.275	0.977	0.745	1.239	0.713	0.635	0.587	0.893	0.811	0.89
Q8TAQ2	0.873	1.594	1.218	0.509	0.42	0.447	0.752	1.536	0.559	0.979	0.727	0.358	0.237	0.473	0.858	1.104	0.83	0.582	1.336	0.879	1.114	0.552	1.001	1.103	0.59	0.543	0.804	0.624	1.132	1.067	0.744	1.535	0.623	1.163	1.403	1.088	1.245	0.73	1.736	1.252	0.89	0.66	1.168	0.7	0.658	0.557	0.994	0.753	0.842
O94776	0.837	1.593	1.24	0.528	0.412	0.42	0.775	1.491	0.562	0.928	0.656	0.342	0.209	0.467	0.819	1.079	0.749	0.563	1.229	0.804	1.024	0.472	0.883	0.993	0.568	0.502	0.755	0.601	1.014	0.983	0.673	1.483	0.645	1.09	1.326	1.024	1.107	0.629	1.711	1.125	0.915	0.676	1.128	0.668	0.628	0.539	0.905	0.754	0.854
P62906	0.851	1.635	1.275	0.495	0.384	0.401	0.737	1.422	0.556	0.951	0.691	0.349	0.206	0.478	0.826	1.076	0.819	0.56	1.267	0.848	1.062	0.506	0.933	0.978	0.57	0.513	0.78	0.575	1.023	0.976	0.636	1.547	0.655	1.197	1.397	1.088	1.121	0.652	1.704	1.162	0.906	0.673	1.133	0.653	0.579	0.523	0.881	0.709	0.851
B3KS98	0.82	1.579	1.245	0.511	0.399	0.458	0.74	1.472	0.499	0.812	0.573	0.309	0.187	0.401	0.736	0.921	0.761	0.541	1.217	0.818	1.075	0.486	0.908	1.124	0.545	0.512	0.773	0.561	1.051	0.989	0.667	1.555	0.662	1.126	1.3	1.012	1.179	0.655	1.684	1.286	0.896	0.744	1.058	0.641	0.645	0.524	0.931	0.841	0.818
P12004	0.855	1.643	1.303	0.502	0.377	0.424	0.78	1.495	0.563	0.997	0.698	0.348	0.209	0.49	0.858	1.057	0.764	0.496	1.151	0.814	0.959	0.439	0.807	0.931	0.565	0.483	0.78	0.558	0.934	0.909	0.582	1.433	0.624	1.095	1.354	0.995	0.996	0.579	1.524	1.151	0.916	0.692	1.168	0.667	0.596	0.503	0.864	0.753	0.836
Q14764	0.859	1.777	1.316	0.531	0.416	0.449	0.765	1.579	0.614	1.056	0.751	0.357	0.21	0.471	0.892	1.181	0.794	0.53	1.13	0.815	1.045	0.484	0.878	1.036	0.57	0.501	0.766	0.572	1.027	1.002	0.679	1.505	0.641	1.035	1.242	0.975	1.019	0.624	1.502	1.06	0.901	0.678	1.091	0.634	0.571	0.502	0.84	0.736	0.804
O60361	0.894	1.622	1.207	0.517	0.349	0.416	0.92	1.317																																									0.84
A0A286YFF7	0.891	1.75	1.322	0.553	0.408	0.485	0.855	1.596	0.552	0.961	0.71	0.331	0.209	0.49	0.895	1.014	0.778	0.508	1.218	0.809	1.092	0.449	0.857	1.046	0.536	0.451	0.796	0.577	1.113	1.046	0.689	1.575	0.603	1.037	1.398	0.996	1.036	0.524	1.604	1.16	0.902	0.615	1.164	0.586	0.61	0.514	0.808	0.704	0.942
P20618	0.883	1.692	1.348	0.542	0.423	0.419	0.787	1.562	0.618	1.077	0.773	0.35	0.223	0.527	0.971	1.21	0.832	0.574	1.295	0.866	1.112	0.532	0.99	1.042	0.564	0.499	0.784	0.569	1.029	0.973	0.64	1.462	0.659	1.138	1.36	1.085	1.114	0.656	1.694	1.169	0.879	0.679	1.143	0.685	0.625	0.536	0.913	0.756	0.83
Q5TA02																																																	0.572
P15121	0.831	1.547	1.226	0.518	0.402	0.434	0.727	1.353	0.523	0.817	0.592	0.316	0.199	0.371	0.716	0.925	0.754	0.538	1.194	0.776	0.991	0.456	0.848	0.938	0.56	0.493	0.788	0.535	1.035	0.969	0.678	1.441	0.629	1.1	1.267	0.963	1.112	0.625	1.734	1.122	0.891	0.697	1.158	0.69	0.593	0.522	0.916	0.74	0.833
P13798	0.853	1.537	1.194	0.492	0.365	0.425	0.703	1.39	0.586	0.946	0.68	0.37	0.209	0.468	0.795	1.094	0.787	0.536	1.221	0.846	1.048	0.508	0.876	1.038	0.527	0.459	0.74	0.539	0.972	0.926	0.61	1.393	0.709	1.128	1.357	1.08	1.093	0.616	1.648	1.204	0.918	0.68	1.13	0.656	0.618	0.518	0.889	0.746	0.833
Q15181	0.861	1.686	1.349	0.524	0.378	0.418	0.758	1.461	0.571	0.946	0.673	0.324	0.208	0.427	0.846	1.026	0.791	0.525	1.178	0.825	1.013	0.482	0.871	0.982	0.554	0.49	0.78	0.566	0.987	0.941	0.64	1.471	0.645	1.086	1.336	1.022	1.088	0.652	1.652	1.118	0.916	0.703	1.168	0.677	0.593	0.518	0.903	0.746	0.836
B1AKJ5	0.877	1.754	1.395	0.53	0.38	0.38	0.782	1.58	0.685	1.177	0.849	0.368	0.236	0.51	0.995	1.342	0.896	0.642	1.41	1.011	1.219	0.653	1.077	1.223	0.557	0.523	0.793	0.541	0.933	0.919	0.605	1.436	0.659	1.095	1.336	1.012	1.109	0.693	1.532	1.232	0.915	0.695	1.102	0.688	0.625	0.525	0.869	0.77	0.791
P05362	0.879	1.539	1.18	0.534	0.467	0.485	0.766	1.475	0.491	0.788	0.601	0.345	0.205	0.416	0.702	0.918	0.815	0.575	1.219	0.862	1.043	0.49	0.896	1.032	0.581	0.489	0.782	0.605	1.078	1.013	0.674	1.515	0.679	1.153	1.372	1.068	1.131	0.636	1.798	1.193	0.907	0.688	1.189	0.727	0.633	0.554	0.946	0.792	0.883
Q6P2E9	0.864	1.717	1.303	0.535	0.405	0.433	0.754	1.625	0.538	0.934	0.709	0.367	0.21	0.481	0.846	1.087	0.778	0.551	1.189	0.862	1.044	0.508	0.904	1.032	0.567	0.493	0.766	0.593	1.128	1.099	0.741	1.584	0.646	1.126	1.39	1.072	1.17	0.655	1.85	1.252	0.877	0.689	1.126	0.66	0.619	0.566	0.896	0.748	0.863
P49189	0.877	1.763	1.364	0.545	0.379	0.401	0.73	1.573	0.643	1.149	0.813	0.363	0.231	0.533	0.979	1.232	0.878	0.588	1.384	0.909	1.141	0.537	0.959	1.086	0.533	0.486	0.744	0.55	0.933	0.896	0.608	1.399	0.64	1.069	1.296	0.981	1.021	0.6	1.557	1.137	0.937	0.696	1.152	0.637	0.575	0.527	0.874	0.725	0.809
H3BNC9	0.835	1.729	1.298	0.505	0.348	0.394	0.681	1.465	0.557	0.99	0.697	0.34	0.191	0.457	0.735	1.045	0.86	0.557	1.319	0.911	1.09	0.512	0.908	1.121	0.533	0.476	0.79	0.533	0.924	0.889	0.564	1.471	0.65	1.107	1.394	1.035	1.02	0.593	1.531	1.138	0.949	0.645	1.08	0.561	0.497	0.419	0.755	0.652	0.849
P22090	0.822	1.612	1.249	0.472	0.351	0.404	0.688	1.403	0.622	1.13	0.759	0.342	0.207	0.46	0.905	1.222	0.845	0.554	1.269	0.895	1.136	0.541	0.938	1.037	0.546	0.498	0.782	0.531	0.947	0.93	0.602	1.453	0.607	1.1	1.289	1.061	1.06	0.637	1.471	1.094	0.904	0.657	1.082	0.643	0.535	0.517	0.858	0.704	0.84
Q9H2M9	0.836	1.599	1.263	0.515	0.372	0.388	0.726	1.413	0.651	1.068	0.789	0.363	0.226	0.481	0.95	1.236	0.789	0.564	1.241	0.837	1.069	0.508	0.931	1.016	0.588	0.518	0.79	0.567	1.008	1.005	0.695	1.496	0.633	1.118	1.334	1.024	1.091	0.684	1.592	1.13	0.92	0.695	1.056	0.664	0.623	0.56	0.909	0.738	0.848
P26196	0.88	1.784	1.393	0.523	0.432	0.451	0.812	1.74	0.509	0.915	0.672	0.326	0.202	0.456	0.823	1.009	0.771	0.518	1.207	0.799	1.016	0.474	0.917	1.046	0.606	0.533	0.84	0.625	1.152	1.078	0.755	1.629	0.659	1.17	1.419	1.076	1.192	0.695	1.697	1.265	0.903	0.682	1.152	0.677	0.645	0.532	0.917	0.772	0.892
P11498	0.857	1.563	1.27	0.503	0.391	0.408	0.741	1.499	0.621	1.049	0.771	0.356	0.232	0.455	0.935	1.237	0.919	0.691	1.379	0.993	1.234	0.662	1.052	1.124	0.575	0.522	0.815	0.575	1.009	0.977	0.682	1.623	0.661	1.138	1.379	1.089	1.065	0.666	1.563	1.249	0.937	0.678	1.093	0.7	0.641	0.584	0.921	0.783	0.848
P00918	0.843	1.501	1.209	0.498	0.383	0.428	0.625	1.342	0.512	0.821	0.599	0.34	0.206	0.364	0.705	0.92	0.811	0.531	1.177	0.8	0.973	0.473	0.85	0.924	0.54	0.479	0.753	0.497	0.893	0.886	0.594	1.4	0.617	1.056	1.243	0.953	1.012	0.57	1.548	1.08	0.903	0.691	1.175	0.659	0.598	0.494	0.855	0.736	0.833
P48739	0.86	1.692	1.326	0.507	0.383	0.425	0.73	1.532	0.578	1.035	0.725	0.343	0.206	0.464	0.883	1.14	0.811	0.554	1.292	0.869	1.108	0.504	0.931	1.076	0.55	0.502	0.786	0.574	0.984	0.935	0.625	1.478	0.644	1.104	1.377	1.029	1.099	0.627	1.652	1.21	0.905	0.666	1.144	0.648	0.587	0.512	0.898	0.739	0.846
Q96C19	0.842	1.526	1.178	0.481	0.392	0.44	0.802	1.405	0.551	0.859	0.618	0.334	0.207	0.408	0.776	0.926	0.785	0.526	1.186	0.83	0.963	0.456	0.828	0.935	0.554	0.477	0.743	0.554	0.906	0.914	0.617	1.354	0.661	1.04	1.317	0.993	1.023	0.554	1.578	1.146	0.943	0.675	1.102	0.626	0.565	0.495	0.79	0.67	0.904
Q8NC51	0.824	1.58	1.217	0.539	0.373	0.385	0.699	1.43	0.595	1.01	0.677	0.322	0.201	0.457	0.85	1.062	0.767	0.568	1.305	0.811	1.015	0.453	0.908	1.004	0.518	0.464	0.741	0.568	0.953	0.966	0.633	1.344	0.656	1.044	1.366	1.017	1.109	0.592	1.677	1.128	0.933	0.638	1.139	0.619	0.565	0.515	0.823	0.661	0.889
Q07960	0.861	1.777	1.38	0.531	0.416	0.456	0.808	1.657	0.523	0.926	0.66	0.357	0.24	0.482	0.847	1.042	0.863	0.625	1.436	1.009	1.298	0.584	1.111	1.234	0.596	0.523	0.835	0.603	1.088	1.06	0.71	1.57	0.651	1.121	1.472	1.115	1.215	0.67	1.735	1.286	0.913	0.664	1.146	0.659	0.639	0.55	0.933	0.786	0.922
Q96A33	0.838	1.793	1.392	0.525	0.452	0.545	0.785	1.698	0.58	1.06	0.716	0.336	0.197	0.473	0.949	1.143	0.742	0.561	1.255	0.818	1.066	0.489	0.846	1.036	0.589	0.514	0.859	0.583	1.106	1.051	0.678	1.596	0.584	1.08	1.378	1.007	1.061	0.609	1.609	1.134	0.905	0.69	1.161	0.652	0.58	0.486	0.869	0.751	0.847
G3V1V0	0.864	1.637	1.304	0.498	0.371	0.428	0.746	1.429	0.556	0.942	0.661	0.323	0.189	0.446	0.798	1.005	0.796	0.53	1.164	0.841	0.978	0.48	0.839	0.938	0.547	0.482	0.782	0.563	0.935	0.909	0.603	1.416	0.654	1.102	1.393	1.024	1.061	0.581	1.56	1.156	0.919	0.65	1.098	0.59	0.537	0.463	0.745	0.658	0.869
P09382	0.731	1.544	1.159	0.418	0.321	0.39	0.648	1.306	0.523	0.98	0.648	0.3	0.182	0.423	0.807	1.049	0.75	0.503	1.225	0.744	1.004	0.408	0.88	0.995	0.525	0.469	0.685	0.48	0.953	0.887	0.592	1.444	0.563	0.948	1.319	0.935	0.937	0.594	1.51	1.09	0.933	0.663	1.083	0.653	0.545	0.476	0.768	0.665	0.739
Q00653	0.907	1.92	1.548	0.563	0.479	0.435	0.907	1.741	0.628	1.091	0.781	0.362	0.239	0.491	0.969	1.264	0.908	0.622	1.354	0.942	1.239	0.644	1.123	1.224	0.576	0.537	0.872	0.633	1.113	1.11	0.754	1.576	0.702	1.199	1.376	1.165	1.201	0.738	1.713	1.273	0.979	0.733	1.274	0.781	0.732	0.656	1.138	0.876	0.919
P13929																																									0.934	0.787	1.115	0.741	0.593	0.541	0.835	0.712
Q9NTI5	0.882	1.703	1.287	0.55	0.451	0.462	0.795	1.599	0.563	0.936	0.657	0.344	0.208	0.396	0.811	1.05	0.859	0.623	1.405	0.989	1.231	0.623	1.058	1.181	0.545	0.493	0.798	0.573	0.983	0.966	0.679	1.46	0.635	1.151	1.366	1.059	1.139	0.677	1.716	1.158	0.911	0.637	1.108	0.618	0.569	0.491	0.84	0.69	0.873
O75694	0.878	1.622	1.313	0.538	0.396	0.393	0.767	1.548	0.643	1.084	0.786	0.347	0.235	0.533	1.05	1.206	1.01	0.705	1.622	1.181	1.425	0.731	1.239	1.377	0.58	0.539	0.831	0.614	1.016	0.945	0.663	1.507	0.592	1.032	1.414	1.062	0.95	0.657	1.394	1.309	0.908	0.692	1.159	0.697	0.661	0.598	0.997	0.801	0.897
P30740	0.862	1.59	1.24	0.501	0.386	0.424	0.699	1.459	0.546	0.945	0.667	0.33	0.207	0.423	0.737	1.035	0.755	0.502	1.163	0.789	0.949	0.46	0.784	0.916	0.532	0.469	0.771	0.522	0.916	0.878	0.586	1.396	0.631	1.093	1.291	0.988	1.031	0.616	1.578	1.107	0.908	0.668	1.128	0.646	0.575	0.499	0.845	0.716	0.824
P30048	0.843	1.5	1.185	0.503	0.359	0.416	0.687	1.327	0.56	0.952	0.671	0.327	0.198	0.403	0.749	1.013	0.778	0.503	1.105	0.8	0.938	0.428	0.759	0.835	0.549	0.485	0.789	0.543	0.928	0.902	0.594	1.419	0.63	1.028	1.298	0.978	0.991	0.572	1.507	1.099	0.916	0.67	1.111	0.62	0.56	0.467	0.803	0.699	0.81
P05091	0.889	1.792	1.438	0.528	0.402	0.389	0.828	1.65	0.669	1.157	0.788	0.36	0.245	0.501	1.056	1.259	0.875	0.602	1.379	1.001	1.205	0.605	1.007	1.111	0.563	0.516	0.799	0.566	1.021	0.946	0.651	1.537	0.643	1.086	1.392	1.038	1.06	0.648	1.542	1.193	0.913	0.695	1.141	0.647	0.623	0.552	0.924	0.79	0.824
P02649	0.87	1.624	1.24	0.533	0.413	0.443	0.78	1.542	0.528	0.851	0.596	0.334	0.2	0.484	0.784	0.956	0.663	0.482	1.068	0.734	0.949	0.364	0.734	0.917	0.532	0.455	0.732	0.537	0.97	0.916	0.585	1.4	0.652	1.178	1.443	1.055	1.099	0.607	1.815	1.296	0.842	0.655	1.112	0.569	0.55	0.465	0.843	0.697	0.839
Q8NBS9	0.898	1.531	1.258	0.561	0.434	0.47	0.846	1.479	0.57	0.942	0.693	0.343	0.207	0.478	0.84	1.053	0.792	0.542	1.246	0.852	1.054	0.489	0.873	1.009	0.548	0.504	0.794	0.609	1.066	1.059	0.698	1.568	0.655	1.168	1.453	1.119	1.139	0.64	1.728	1.308	0.913	0.686	1.156	0.646	0.589	0.539	0.879	0.79	0.883
P42285	0.83	1.635	1.264	0.532	0.377	0.408	0.722	1.492	0.583	1.018	0.715	0.344	0.196	0.465	0.924	1.141	0.837	0.602	1.363	0.916	1.157	0.549	0.997	1.135	0.581	0.537	0.787	0.611	1.065	1.022	0.71	1.545	0.594	1.107	1.328	1.013	1.098	0.656	1.633	1.13	0.895	0.705	1.131	0.669	0.62	0.558	0.935	0.73	0.803
Q15691	0.886	1.693	1.294	0.498	0.355	0.39	0.781	1.444	0.603	1.089	0.772	0.344	0.203	0.508	1.001	1.155	0.859	0.557	1.287	0.937	1.124	0.533	0.939	1.087	0.542	0.473	0.758	0.552	0.91	0.885	0.573	1.444	0.659	1.095	1.427	1.042	1.049	0.619	1.524	1.19	0.92	0.639	1.178	0.627	0.596	0.53	0.832	0.74	0.858
Q9Y5X1	0.86	1.662	1.3	0.519	0.394	0.428	0.786	1.547	0.617	1.097	0.784	0.358	0.236	0.547	1.025	1.269	0.793	0.535	1.294	0.918	1.096	0.529	1.008	1.225	0.563	0.49	0.785	0.583	1.039	0.984	0.687	1.554	0.654	1.118	1.358	1.031	1.109	0.652	1.594	1.152	0.882	0.668	1.135	0.668	0.59	0.531	0.908	0.773	0.864
Q13347	0.828	1.521	1.173	0.491	0.376	0.441	0.675	1.38	0.568	0.932	0.679	0.349	0.212	0.471	0.815	1.048	0.709	0.508	1.197	0.753	0.932	0.436	0.793	0.903	0.546	0.483	0.77	0.529	0.95	0.937	0.635	1.464	0.631	1.053	1.302	0.984	1.025	0.59	1.6	1.072	0.883	0.677	1.101	0.633	0.571	0.503	0.848	0.713	0.848
Q15833	0.865	1.633	1.25	0.529	0.37	0.411	0.757	1.48	0.628	1.069	0.766	0.383	0.236	0.472	0.907	1.169	1.023	0.647	1.493	1.088	1.435	0.704	1.207	1.424	0.633	0.559	0.774	0.591	1.014	0.989	0.639	1.516	0.651	1.05	1.298	1.018	1.094	0.636	1.522	1.19	0.9	0.708	1.126	0.706	0.625	0.561	0.897	0.808	0.827
Q96P70	0.834	1.61	1.238	0.53	0.46	0.47	0.763	1.444	0.606	1.025	0.693	0.367	0.24	0.513	0.957	1.114	0.887	0.607	1.366	0.993	1.196	0.626	1.065	1.22	0.632	0.585	0.891	0.634	1.167	1.092	0.754	1.644	0.699	1.139	1.464	1.083	1.15	0.724	1.666	1.292	0.901	0.692	1.079	0.661	0.64	0.551	0.928	0.78	0.887
Q9Y376	0.852	1.606	1.215	0.513	0.362	0.363	0.767	1.312	0.581	0.932	0.683	0.348	0.214	0.456	0.836	1.015	0.786	0.556	1.166	0.833	0.995	0.472	0.856	0.951	0.553	0.504	0.764	0.606	1.029	0.996	0.661	1.476	0.629	1.023	1.363	1.004	1.028	0.541	1.543	1.136	0.908	0.61	1.077	0.574	0.617	0.529	0.796	0.674	0.905
Q13596	0.917	1.753	1.409	0.511	0.385	0.392	0.877	1.608	0.645	1.136	0.788	0.368	0.21	0.576	1.046	1.295	0.927	0.626	1.468	1.058	1.3	0.64	1.144	1.351	0.585	0.526	0.788	0.608	1.092	1.047	0.68	1.53	0.67	1.127	1.433	1.085	1.174	0.656	1.617	1.273	0.942	0.717	1.134	0.675	0.655	0.527	0.891	0.788	0.918
P20073	0.907	1.796	1.414	0.523	0.391	0.462	0.835	1.669	0.568	0.979	0.684	0.335	0.195	0.477	0.867	1.082	0.799	0.553	1.268	0.875	1.1	0.512	0.891	1.083	0.57	0.531	0.797	0.563	1.033	0.972	0.673	1.52	0.7	1.124	1.373	1.052	1.099	0.638	1.631	1.221	0.936	0.715	1.156	0.639	0.59	0.529	0.872	0.75	0.845
P62834	0.87	1.869	1.468	0.508	0.351	0.432	0.796	1.648	0.6	1.083	0.754	0.309	0.191	0.463	0.995	1.134	0.729	0.481	1.221	0.815	1.031	0.437	0.796	1.009	0.55	0.516	0.839	0.54	1.005	0.9	0.611	1.481	0.636	1.113	1.499	1.046	1.083	0.605	1.638	1.23	0.849	0.612	1.163	0.622	0.551	0.495	0.835	0.75	0.857
Q16831	0.841	1.469	1.202	0.546	0.4	0.464	0.741	1.413	0.491	0.768	0.555	0.307	0.187	0.404	0.766	0.888	0.725	0.512	1.136	0.767	0.993	0.46	0.877	0.994	0.557	0.492	0.761	0.553	1	1.003	0.672	1.488	0.643	1.087	1.336	1.025	1.137	0.654	1.727	1.157	0.922	0.731	1.145	0.727	0.641	0.569	1.007	0.822	0.852
P61224	0.843	1.686	1.368	0.483	0.358	0.406	0.819	1.564	0.546	0.905	0.663	0.312	0.232	0.475	0.851	1	0.717	0.472	1.13	0.758	0.944	0.455	0.804	0.914	0.561	0.477	0.787	0.539	1.011	0.971	0.643	1.469	0.645	1.101	1.382	1.033	1.065	0.624	1.705	1.205	0.887	0.676	1.162	0.672	0.587	0.502	0.905	0.774	0.906
P25789	0.838	1.524	1.214	0.477	0.352	0.385	0.72	1.36	0.63	1.04	0.759	0.357	0.227	0.481	0.843	1.141	0.823	0.549	1.233	0.863	1.037	0.486	0.891	1.089	0.54	0.488	0.756	0.54	0.937	0.911	0.601	1.388	0.657	1.094	1.308	1.01	1.052	0.624	1.559	1.227	0.918	0.67	1.09	0.61	0.569	0.487	0.817	0.716	0.851
Q13428	0.855	1.49	1.122	0.514	0.443	0.423	0.675	1.36	0.51	0.828	0.631	0.321	0.193	0.433	0.75	0.962	0.807	0.618	1.326	0.881	1.106	0.527	0.993	1.133	0.534	0.5	0.774	0.615	1.072	1.042	0.703	1.43	0.673	1.113	1.345	1.058	1.19	0.615	1.757	1.169	0.888	0.665	1.212	0.653	0.629	0.583	0.938	0.709	0.839
P61247	0.831	1.676	1.294	0.477	0.366	0.419	0.723	1.479	0.551	0.931	0.653	0.327	0.203	0.476	0.812	1.026	0.76	0.502	1.205	0.76	0.995	0.419	0.785	0.941	0.559	0.497	0.784	0.538	0.994	0.927	0.611	1.522	0.634	1.127	1.383	1.019	1.054	0.594	1.699	1.141	0.931	0.662	1.139	0.616	0.545	0.491	0.864	0.704	0.853
Q8WU79	0.891	1.698	1.291	0.516	0.396	0.427	0.755	1.476	0.599	1.046	0.741	0.343	0.216	0.458	0.876	1.133	0.758	0.543	1.176	0.789	0.955	0.447	0.826	0.951	0.553	0.505	0.784	0.558	0.97	0.929	0.64	1.409	0.602	1.096	1.326	1.018	1.108	0.634	1.673	1.134	0.89	0.672	1.089	0.622	0.577	0.485	0.785	0.706	0.895
Q9UBB4	0.854	1.598	1.24	0.504	0.445	0.521	0.811	1.562	0.559	0.97	0.697	0.368	0.213	0.455	0.849	1.047	0.765	0.553	1.203	0.828	1.114	0.492	0.955	1.121	0.594	0.528	0.808	0.618	1.132	1.086	0.711	1.571	0.642	1.053	1.378	1.015	1.134	0.605	1.604	1.26	0.928	0.684	1.131	0.674	0.638	0.563	0.916	0.809	0.845
Q13409	0.818	1.5	1.159	0.522	0.453	0.491	0.776	1.378	0.465	0.737	0.53	0.32	0.186	0.391	0.69	0.843	0.697	0.484	1.072	0.738	0.923	0.413	0.834	0.885	0.566	0.481	0.785	0.58	1.05	1.03	0.664	1.5	0.631	1.177	1.433	1.099	1.231	0.648	1.876	1.161	0.844	0.655	1.051	0.633	0.574	0.491	0.841	0.677	0.906
P05141	0.813	1.607	1.287	0.492	0.355	0.385	0.713	1.399	0.556	0.946	0.687	0.318	0.231	0.438	0.853	1.03	0.731	0.499	1.121	0.745	0.937	0.415	0.759	0.908	0.551	0.519	0.786	0.535	0.959	0.891	0.61	1.461	0.643	1.091	1.316	0.965	1.018	0.595	1.603	1.156	0.928	0.682	1.206	0.679	0.65	0.532	1.046	0.786	0.808
Q13561	0.905	1.777	1.385	0.523	0.394	0.4	0.826	1.611	0.59	1.027	0.743	0.364	0.229	0.52	0.912	1.157	0.807	0.56	1.268	0.87	1.145	0.503	0.933	1.134	0.579	0.494	0.815	0.629	1.056	1.047	0.683	1.63	0.687	1.139	1.461	1.11	1.163	0.64	1.706	1.284	0.97	0.679	1.222	0.623	0.633	0.571	0.877	0.791	0.924
P18085	0.859	1.761	1.395	0.506	0.379	0.403	0.78	1.542	0.689	1.303	0.896	0.336	0.214	0.597	1.139	1.367	0.703	0.456	1.121	0.734	0.916	0.436	0.739	0.873	0.539	0.489	0.822	0.567	0.943	0.909	0.612	1.452	0.61	1.068	1.363	1.01	1.027	0.646	1.512	1.176	0.887	0.608	1.077	0.63	0.522	0.472	0.802	0.718	0.794
D6RER5	0.863	1.636	1.252	0.54	0.471	0.515	0.799	1.528	0.499	0.794	0.572	0.317	0.208	0.414	0.778	0.878	0.787	0.532	1.167	0.811	1.013	0.474	0.854	0.927	0.553	0.519	0.795	0.558	1.046	1.049	0.673	1.451	0.625	1.144	1.369	1.054	1.263	0.658	1.846	1.208	0.893	0.677	1.115	0.67	0.575	0.487	0.876	0.705	0.836
P51665	0.851	1.585	1.244	0.553	0.453	0.506	0.795	1.565	0.661	1.09	0.757	0.339	0.217	0.477	1.026	1.187	0.763	0.521	1.208	0.845	1.049	0.51	0.896	1.021	0.594	0.488	0.791	0.582	1.04	1.049	0.681	1.52	0.624	1.117	1.346	1.021	1.067	0.615	1.748	1.151	0.899	0.657	1.143	0.663	0.592	0.498	0.911	0.761	0.834
A0A0A0MSK5	0.895	1.619	1.279	0.493	0.409	0.463	0.761	1.549	0.546	0.929	0.681	0.323	0.203	0.471	0.811	1.039	0.754	0.53	1.153	0.782	0.94	0.454	0.833	0.954	0.567	0.506	0.818	0.577	0.996	1.014	0.641	1.505	0.637	1.121	1.391	1.066	1.16	0.632	1.707	1.228	0.922	0.681	1.145	0.643	0.588	0.568	0.842	0.728	0.924
P50281	0.859	1.677	1.333	0.532	0.406	0.494	0.841	1.555	0.574	1.006	0.709	0.344	0.205	0.553	0.972	1.102	0.739	0.534	1.263	0.827	1.071	0.483	0.914	1.082	0.563	0.511	0.812	0.571	1.045	0.982	0.66	1.531	0.625	1.101	1.393	1.073	1.041	0.626	1.621	1.175	0.847	0.674	1.124	0.69	0.613	0.508	0.889	0.772	0.874
P30085	0.873	1.935	1.541	0.501	0.39	0.394	0.855	1.765	0.646	1.189	0.805	0.335	0.229	0.551	1.061	1.262	0.818	0.588	1.442	0.931	1.217	0.546	1.036	1.279	0.526	0.475	0.818	0.541	0.928	0.903	0.572	1.382	0.6	1.085	1.391	1.011	1.104	0.628	1.665	1.205	0.849	0.591	1.121	0.645	0.574	0.504	0.878	0.721	0.843
P05534	0.905	1.772	1.405	0.564	0.439	0.487	0.831	1.648	0.596	1.131	0.782	0.374	0.22	0.541	0.942	1.258	0.725	0.522	1.222	0.817	1.056	0.475	0.869	1.129	0.557	0.476	0.826	0.604	1.088	1.028	0.701	1.587	0.664	1.146	1.504	1.084	1.255	0.687	1.89	1.387	0.907	0.702	1.168	0.667	0.643	0.535	0.939	0.848	0.925
P30040	0.79	1.702	1.244	0.447	0.325	0.378	0.745	1.388	0.569	1.03	0.69	0.34	0.199	0.458	0.807	0.987	0.692	0.484	1.06	0.753	0.934	0.396	0.758	0.866	0.504	0.492	0.718	0.524	0.903	0.862	0.57	1.35	0.591	1.012	1.308	0.997	0.965	0.529	1.513	1.13	0.889	0.625	1.096	0.575	0.55	0.464	0.728	0.656	0.839
P56537	0.886	1.684	1.343	0.534	0.428	0.473	0.84	1.595	0.597	0.985	0.773	0.388	0.228	0.513	0.882	1.126	0.724	0.496	1.067	0.783	0.917	0.431	0.843	0.888	0.625	0.512	0.823	0.627	1.059	1.076	0.722	1.632	0.688	1.171	1.441	1.143	1.12	0.675	1.834	1.266	0.926	0.715	1.19	0.745	0.648	0.564	0.933	0.783	0.86
P61011	0.841	1.668	1.386	0.525	0.409	0.385	0.783	1.568	0.706	1.302	0.888	0.349	0.259	0.589	1.142	1.402	0.932	0.598	1.437	1.058	1.236	0.63	1.066	1.266	0.562	0.492	0.761	0.549	1.049	0.995	0.648	1.416	0.622	1.093	1.444	1.045	1.071	0.626	1.57	1.244	0.908	0.67	1.169	0.677	0.596	0.523	0.898	0.774	0.829
Q9UJU6	0.889	1.58	1.184	0.534	0.446	0.483	0.836	1.511	0.573	0.939	0.664	0.351	0.214	0.539	0.857	1.059	0.787	0.62	1.37	0.907	1.2	0.509	1.05	1.198	0.596	0.517	0.831	0.64	1.101	1.045	0.737	1.541	0.664	1.078	1.448	1.103	1.184	0.653	1.795	1.175	0.894	0.703	1.201	0.699	0.626	0.559	0.97	0.771	0.841
P24539	0.861	1.491	1.153	0.52	0.401	0.425	0.711	1.362	0.605	0.96	0.694	0.341	0.208	0.526	0.894	1.078	0.818	0.583	1.288	0.87	1.069	0.535	0.95	1.029	0.563	0.485	0.79	0.565	0.966	0.955	0.629	1.387	0.669	1.096	1.296	1.043	1.095	0.645	1.59	1.146	0.906	0.679	1.117	0.645	0.55	0.478	0.833	0.697	0.858
K7EJH8																																																	0.865
O94925	0.832	1.712	1.361	0.482	0.346	0.429	0.752	1.554	0.62	1.113	0.78	0.334	0.19	0.499	0.997	1.209	0.86	0.582	1.387	0.943	1.183	0.566	1.031	1.148	0.553	0.518	0.807	0.572	0.986	1.007	0.657	1.49	0.653	1.098	1.393	1.045	1.123	0.647	1.552	1.224	0.904	0.674	1.137	0.628	0.597	0.487	0.869	0.756	0.872
Q14289	0.894	1.682	1.215	0.563	0.431	0.583	0.759	1.607	0.552	0.922	0.68	0.363	0.224	0.489	0.886	1.053	0.729	0.533	1.191	0.839	1.075	0.523	0.9	1.032	0.583	0.483	0.836	0.604	1.027	1.036	0.73	1.699	0.608	1.108	1.384	1.131	1.113	0.63	1.746	1.193	0.936	0.686	1.097	0.66	0.613	0.517	0.876	0.789	0.803
P61201	0.861	1.71	1.327	0.51	0.384	0.377	0.759	1.535	0.65	1.195	0.856	0.36	0.231	0.526	1.128	1.288	0.875	0.608	1.347	0.943	1.15	0.557	0.982	1.068	0.532	0.506	0.781	0.559	0.992	0.966	0.665	1.523	0.631	1.046	1.372	1.047	1.098	0.625	1.625	1.209	0.903	0.656	1.142	0.627	0.6	0.508	0.872	0.739	0.835
O14744	0.865	1.652	1.291	0.548	0.407	0.457	0.747	1.512	0.548	0.925	0.665	0.351	0.215	0.449	0.802	1.06	0.814	0.579	1.286	0.866	1.103	0.513	0.962	1.056	0.573	0.519	0.798	0.566	0.997	0.946	0.64	1.487	0.664	1.135	1.35	1.051	1.126	0.643	1.712	1.193	0.908	0.698	1.124	0.674	0.645	0.548	0.954	0.764	0.846
Q5TCU3	0.789	1.564	1.227	0.471	0.368	0.428	0.844	1.407	0.553	0.944	0.64	0.339	0.197	0.449	0.895	1.003	0.718	0.516	1.112	0.789	0.964	0.409	0.784	0.984	0.542	0.471	0.81	0.598	1.004	0.945	0.637	1.468	0.632	1.081	1.371	1.046	1.008	0.528	1.568	1.178	0.904	0.624	1.088	0.585	0.536	0.47	0.767	0.673	0.865
P13804	0.868	1.665	1.294	0.522	0.37	0.381	0.712	1.458	0.619	1.028	0.79	0.357	0.227	0.463	0.869	1.154	0.784	0.561	1.174	0.824	0.972	0.466	0.844	0.908	0.55	0.47	0.751	0.588	0.893	0.869	0.578	1.397	0.661	1.089	1.334	1.06	1.069	0.622	1.656	1.138	0.885	0.633	1.046	0.629	0.564	0.508	0.83	0.693	0.859
P46821	0.847	1.472	1.17	0.498	0.453	0.475	0.777	1.434	0.492	0.804	0.573	0.319	0.205	0.402	0.7	0.916	0.694	0.574	1.145	0.715	0.9	0.443	0.861	0.807	0.654	0.517	0.805	0.616	1.05	0.997	0.699	1.469	0.656	1.075	1.277	0.941	1.086	0.606	1.611	1.07	0.913	0.652	1.109	0.67	0.601	0.528	0.874	0.719	0.95
Q8N1G4	0.844	1.607	1.254	0.544	0.422	0.439	0.734	1.472	0.61	1.016	0.726	0.354	0.223	0.506	0.922	1.146	0.75	0.53	1.215	0.812	1.006	0.472	0.863	0.953	0.566	0.493	0.772	0.592	0.972	0.95	0.666	1.427	0.65	1.141	1.432	1.064	1.16	0.633	1.765	1.214	0.885	0.689	1.056	0.653	0.614	0.539	0.879	0.75	0.829
O00267	0.822	1.54	1.186	0.529	0.449	0.477	0.762	1.542	0.5	0.779	0.549	0.321	0.192	0.438	0.752	0.91	0.806	0.576	1.277	0.901	1.115	0.531	0.993	1.095	0.601	0.52	0.811	0.607	1.105	1.06	0.738	1.53	0.664	1.16	1.412	1.091	1.157	0.692	1.786	1.202	0.908	0.715	1.15	0.726	0.656	0.557	0.982	0.808	0.84
Q6PKG0	0.85	1.699	1.309	0.524	0.409	0.415	0.76	1.491	0.492	0.837	0.584	0.335	0.199	0.42	0.735	0.93	0.746	0.598	1.184	0.821	1.055	0.494	0.917	0.919	0.61	0.508	0.777	0.614	1.119	1.02	0.725	1.518	0.661	1.15	1.358	1.045	1.146	0.652	1.765	1.137	0.913	0.698	1.16	0.682	0.645	0.572	0.994	0.8	0.854
Q9H0U4	0.819	1.64	1.291	0.493	0.397	0.424	0.739	1.532	0.57	1.104	0.727	0.327	0.2	0.467	0.987	1.163	0.874	0.54	1.452	0.945	1.202	0.476	0.943	1.326	0.543	0.486	0.818	0.537	0.979	0.91	0.596	1.505	0.639	1.096	1.449	0.998	1.01	0.586	1.589	1.221	0.897	0.653	1.12	0.612	0.557	0.467	0.861	0.727	0.871
O96019	0.882	1.74	1.344	0.549	0.39	0.413	0.815	1.678	0.593	0.964	0.67	0.337	0.217	0.486	0.896	1.082	0.783	0.571	1.253	0.893	1.096	0.489	0.942	1.069	0.6	0.513	0.807	0.597	1.043	1.002	0.685	1.533	0.649	1.086	1.369	1.028	1.068	0.612	1.532	1.185	0.908	0.695	1.168	0.705	0.655	0.56	0.925	0.818	0.865
Q13501	0.876	1.772	1.345	0.537	0.421	0.463	0.841	1.602	0.478	0.776	0.554	0.317	0.177	0.42	0.729	0.871	0.722	0.512	1.163	0.768	0.946	0.425	0.781	0.887	0.58	0.509	0.815	0.59	1.055	1.013	0.656	1.573	0.613	1.113	1.348	0.958	1.123	0.611	1.729	1.129	0.885	0.672	1.106	0.615	0.541	0.471	0.829	0.735	0.814
Q92619	0.832	1.493	1.103	0.516	0.477	0.541	0.695	1.401	0.452	0.718	0.536	0.323	0.191	0.409	0.671	0.824	0.806	0.541	1.234	0.832	1.046	0.476	0.901	0.961	0.566	0.478	0.806	0.597	1.006	0.98	0.64	1.469	0.608	1.088	1.347	1.018	1.071	0.596	1.643	1.103	0.902	0.686	1.089	0.635	0.602	0.506	0.869	0.721	0.814
P33121	0.839	1.583	1.221	0.491	0.387	0.46	0.721	1.486	0.608	1.066	0.746	0.38	0.207	0.484	0.95	1.153	0.777	0.515	1.196	0.812	1.053	0.484	0.876	1.051	0.557	0.523	0.827	0.584	1.003	1.012	0.703	1.547	0.708	1.118	1.316	1.067	1.085	0.662	1.629	1.17	0.912	0.66	1.107	0.635	0.573	0.511	0.841	0.778	0.859
P00505	0.802	1.519	1.2	0.474	0.348	0.387	0.688	1.34	0.616	1.074	0.809	0.345	0.214	0.525	0.94	1.194	0.891	0.58	1.359	0.973	1.159	0.547	1.044	1.119	0.566	0.51	0.787	0.602	0.999	0.97	0.671	1.461	0.645	1.056	1.38	1.062	1.11	0.657	1.595	1.288	0.906	0.673	1.122	0.692	0.621	0.549	0.915	0.797	0.81
Q32P51																																																	0.769
Q5W0H4	0.855	1.608	1.26	0.515	0.355	0.448	0.687	1.429	0.577	0.979	0.699	0.324	0.183	0.443	0.776	1.023	0.827	0.528	1.276	0.856	1.05	0.465	0.836	0.948	0.511	0.435	0.762	0.523	0.907	0.875	0.575	1.393	0.622	1.069	1.316	0.997	1.029	0.559	1.458	1.112	0.929	0.651	1.141	0.606	0.526	0.466	0.759	0.647	0.82
Q9UMS4	0.847	1.565	1.192	0.516	0.394	0.407	0.715	1.398	0.628	1.046	0.731	0.344	0.228	0.484	0.91	1.177	0.801	0.553	1.19	0.833	1.014	0.514	0.883	0.956	0.583	0.514	0.801	0.552	0.978	0.938	0.637	1.466	0.661	1.098	1.302	1.01	1.087	0.64	1.583	1.091	0.94	0.719	1.175	0.658	0.585	0.535	0.892	0.741	0.863
Q13451	0.848	1.613	1.253	0.494	0.389	0.43	0.706	1.438	0.553	0.919	0.619	0.331	0.185	0.418	0.814	1.003	0.765	0.528	1.23	0.806	0.984	0.45	0.82	1.029	0.533	0.482	0.765	0.555	0.983	0.976	0.633	1.504	0.65	1.116	1.334	1.029	1.075	0.619	1.645	1.173	0.916	0.677	1.15	0.617	0.559	0.492	0.827	0.728	0.837
P16152	0.879	1.81	1.391	0.527	0.403	0.424	0.785	1.627	0.628	1.127	0.781	0.348	0.213	0.502	0.969	1.213	0.716	0.516	1.141	0.772	0.95	0.444	0.816	1.021	0.573	0.497	0.813	0.588	0.997	0.99	0.654	1.526	0.662	1.106	1.365	1.037	1.058	0.599	1.656	1.182	0.918	0.686	1.154	0.661	0.641	0.55	0.916	0.792	0.919
Q14344	0.868	1.605	1.263	0.523	0.399	0.443	0.757	1.516	0.593	0.979	0.702	0.355	0.224	0.431	0.826	1.098	0.732	0.502	1.105	0.752	0.931	0.45	0.751	0.881	0.58	0.499	0.769	0.572	1.03	0.99	0.662	1.521	0.638	1.139	1.34	1.033	1.117	0.638	1.663	1.178	0.903	0.696	1.116	0.67	0.628	0.537	0.93	0.81	0.837
P67775	0.905	1.653	1.315	0.498	0.363	0.475	0.817	1.546	0.461	0.875	0.574	0.322	0.16	0.377	0.699	0.875	0.624	0.468	0.957	0.641	0.81	0.333	0.637	0.783	0.543	0.508	0.774	0.564	0.881	0.852	0.548	1.408	0.611	1.027	1.318	0.978	0.972	0.554	1.578	1.098	0.898	0.631	1.092	0.57	0.507	0.424	0.667	0.666	0.891
Q14568																																									1.014	1.076	1.275	0.873	0.723	0.721	1.263	1.056
P48637	0.884	1.705	1.304	0.531	0.415	0.412	0.828	1.553	0.608	1.041	0.739	0.352	0.227	0.493	0.955	1.166	0.792	0.549	1.202	0.826	1.021	0.494	0.853	0.969	0.589	0.531	0.797	0.607	1.037	1.05	0.687	1.524	0.637	1.11	1.389	1.076	1.121	0.637	1.773	1.217	0.919	0.661	1.154	0.632	0.593	0.529	0.873	0.714	0.872
P62081	0.775	1.426	1.126	0.47	0.37	0.401	0.615	1.199	0.587	0.954	0.661	0.324	0.216	0.396	0.76	1.04	0.74	0.473	1.096	0.723	0.87	0.409	0.711	0.77	0.54	0.497	0.749	0.509	0.878	0.834	0.572	1.337	0.597	1.069	1.264	0.953	0.987	0.584	1.448	1.026	0.916	0.675	1.098	0.634	0.557	0.481	0.828	0.701	0.818
Q709C8	0.832	1.691	1.265	0.542	0.462	0.481	0.793	1.511	0.68	1.193	0.84	0.341	0.234	0.454	1.009	1.374	0.9	0.637	1.479	0.99	1.405	0.669	1.281	1.301	0.6	0.562	0.768	0.609	1.155	1.097	0.726	1.548	0.711	1.201	1.525	1.19	1.41	0.75	2.05	1.307	0.912	0.717	1.154	0.71	0.629	0.52	1.009	0.786	0.882
Q9Y520	0.767	1.36	1.048	0.524	0.428	0.5	0.772	1.328	0.441	0.628	0.446	0.328	0.169	0.374	0.545	0.74	0.697	0.566	1.225	0.752	1.023	0.464	0.855	0.957	0.549	0.524	0.788	0.634	1.067	1.096	0.719	1.529	0.671	1.226	1.56	1.159	1.248	0.729	1.994	1.367	0.956	0.734	1.158	0.665	0.638	0.527	0.918	0.738	0.922
Q9Y6M1	0.839	1.584	1.175	0.508	0.379	0.415	0.697	1.343	0.548	0.896	0.633	0.335	0.199	0.441	0.763	0.998	0.766	0.531	1.146	0.792	0.972	0.458	0.851	0.902	0.545	0.482	0.749	0.553	0.969	0.918	0.63	1.435	0.632	1.087	1.294	1.014	1.124	0.624	1.652	1.094	0.902	0.703	1.091	0.62	0.58	0.488	0.835	0.684	0.849
B0QZ18	0.833	1.609	1.265	0.479	0.36	0.37	0.694	1.44	0.614	1.075	0.766	0.337	0.215	0.479	0.918	1.203	0.842	0.587	1.296	0.896	1.123	0.542	0.979	1.098	0.527	0.484	0.771	0.544	0.91	0.891	0.606	1.413	0.641	1.052	1.328	1.027	1.07	0.642	1.532	1.192	0.895	0.698	1.118	0.666	0.638	0.536	0.921	0.787	0.832
Q09028	0.834	1.538	1.211	0.508	0.368	0.442	0.665	1.33	0.535	0.878	0.623	0.33	0.187	0.406	0.704	0.948	0.69	0.458	1.079	0.718	0.852	0.37	0.675	0.785	0.542	0.491	0.774	0.512	0.908	0.856	0.57	1.381	0.616	1.048	1.347	0.977	0.944	0.554	1.507	1.141	0.898	0.66	1.106	0.605	0.521	0.437	0.766	0.7	0.816
O43488	0.924	1.842	1.465	0.531	0.413	0.444	0.846	1.668	0.633	1.089	0.763	0.332	0.209	0.576	1.052	1.165	0.792	0.548	1.237	0.83	1.054	0.507	0.881	0.996	0.582	0.535	0.801	0.566	1.022	0.956	0.661	1.488	0.659	1.145	1.39	1.045	1.111	0.628	1.644	1.181	0.896	0.659	1.141	0.672	0.61	0.53	0.919	0.764	0.889
P20936	0.81	1.502	1.225	0.503	0.38	0.451	0.746	1.415	0.951	1.615	1.108	0.431	0.323	0.792	1.571	1.838	0.963	0.681	1.513	1.04	1.294	0.678	1.107	1.291	0.608	0.534	0.807	0.592	0.996	0.968	0.648	1.505	0.633	1.051	1.4	1.037	1.138	0.628	1.613	1.174	0.919	0.676	1.175	0.687	0.637	0.586	1.009	0.777	0.827
Q03405	0.81	1.455	1.142	0.531	0.432	0.5	0.772	1.41	0.457	0.715	0.531	0.307	0.187	0.425	0.773	0.887	0.705	0.54	1.215	0.768	1.008	0.443	0.884	0.984	0.563	0.467	0.812	0.615	1.128	1.072	0.688	1.573	0.663	1.199	1.542	1.159	1.265	0.673	1.951	1.306	0.928	0.687	1.194	0.683	0.621	0.526	0.915	0.765	0.918
Q07065	0.828	1.452	1.138	0.551	0.454	0.498	0.706	1.383	0.606	0.913	0.694	0.357	0.216	0.49	0.947	1.122	0.873	0.622	1.342	0.926	1.161	0.542	1.032	1.095	0.525	0.53	0.853	0.641	1.159	1.207	0.735	1.585	0.748	1.204	1.534	1.148	1.165	0.708	2.148	1.238	0.933	0.723	1.194	0.686	0.643	0.533	0.976	0.761	0.838
P43034	0.82	1.568	1.22	0.47	0.355	0.418	0.787	1.383	0.619	1.052	0.726	0.342	0.204	0.487	0.91	1.131	0.744	0.522	1.222	0.801	0.981	0.445	0.871	0.918	0.583	0.497	0.769	0.563	1.032	0.961	0.672	1.476	0.649	1.099	1.338	1.038	1.055	0.625	1.567	1.152	0.859	0.719	1.134	0.682	0.605	0.488	0.846	0.742	0.812
P15170	0.852	1.659	1.291	0.501	0.4	0.454	0.761	1.492	0.591	1.04	0.747	0.356	0.221	0.46	0.84	1.195	0.77	0.53	1.192	0.789	0.969	0.486	0.819	0.964	0.555	0.506	0.795	0.55	1.009	0.934	0.635	1.479	0.636	1.119	1.359	1.02	1.072	0.614	1.639	1.135	0.923	0.707	1.067	0.618	0.556	0.47	0.826	0.663	0.843
Q07021	0.946	1.816	1.474	0.546	0.409	0.447	0.949	1.693	0.644	1.127	0.804	0.367	0.203	0.573	1.058	1.234	0.769	0.515	1.186	0.85	0.991	0.439	0.8	1.029	0.573	0.503	0.835	0.597	1.002	0.937	0.61	1.504	0.678	1.106	1.473	1.063	1.028	0.619	1.602	1.243	0.878	0.679	1.127	0.667	0.558	0.464	0.787	0.712	0.941
P62820	0.829	1.55	1.248	0.502	0.356	0.408	0.734	1.409	0.566	1.025	0.699	0.318	0.177	0.459	0.863	1.1	0.832	0.569	1.253	0.876	1.065	0.52	0.91	1.03	0.544	0.479	0.78	0.559	0.949	0.926	0.606	1.438	0.62	1.122	1.34	0.994	1.078	0.596	1.665	1.15	0.876	0.649	1.086	0.596	0.532	0.453	0.777	0.711	0.817
P48681	0.856	1.345	0.957	0.686	0.555	0.508	0.75	1.322	0.407	0.656	0.54	0.35	0.187	0.374	0.586	0.76	0.923	0.666	1.486	0.965	1.551	0.649	1.183	1.459	0.573	0.53	0.887	0.613	1.149	1.1	0.799	1.65	0.738	1.17	1.612	1.149	1.265	0.654	1.795	1.256	0.853	0.741	1.201	0.665	0.662	0.539	0.949	0.853	0.907
Q13283	0.809	1.624	1.247	0.509	0.394	0.428	0.748	1.49	0.581	0.98	0.73	0.34	0.216	0.482	0.894	1.151	0.829	0.594	1.369	0.982	1.179	0.563	1.077	1.141	0.566	0.505	0.78	0.593	1.04	1.029	0.664	1.465	0.616	1.097	1.345	1.044	1.085	0.633	1.561	1.091	0.939	0.686	1.176	0.67	0.625	0.563	0.934	0.74	0.883
H0Y7A7	0.892	1.623	1.311	0.505	0.385	0.46	0.803	1.489	0.547	0.956	0.718	0.373	0.197	0.451	0.845	1.067	0.778	0.504	1.1	0.822	0.958	0.42	0.762	0.976	0.531	0.429	0.744	0.534	0.894	0.845	0.561	1.358	0.644	1.081	1.367	1.022	0.99	0.519	1.544	1.133	0.888	0.626	1.182	0.583	0.54	0.453	0.781	0.677	0.948
Q01581	0.858	1.616	1.267	0.529	0.396	0.453	0.768	1.488	0.591	0.996	0.713	0.331	0.202	0.445	0.975	1.119	0.818	0.556	1.275	0.851	1.099	0.55	0.972	1.024	0.547	0.493	0.783	0.552	0.96	0.955	0.656	1.431	0.655	1.1	1.288	1.015	1.104	0.646	1.582	1.139	0.87	0.679	1.157	0.682	0.628	0.526	0.958	0.743	0.815
O60568	0.907	1.697	1.294	0.565	0.453	0.51	0.767	1.587	0.592	1.022	0.713	0.339	0.206	0.483	0.861	1.147	0.72	0.542	1.196	0.77	1.004	0.456	0.907	0.969	0.593	0.525	0.799	0.57	1.028	1.05	0.691	1.577	0.623	1.137	1.404	1.082	1.19	0.668	1.785	1.23	0.89	0.686	1.118	0.669	0.603	0.526	0.869	0.762	0.835
F6TLX2	0.838	1.587	1.215	0.502	0.408	0.437	0.763	1.457	0.616	1.05	0.757	0.327	0.208	0.447	0.873	1.153	0.755	0.53	1.238	0.848	1.037	0.466	0.848	1.132	0.514	0.475	0.772	0.537	0.962	0.956	0.627	1.493	0.666	1.157	1.377	1.066	1.125	0.662	1.71	1.298	0.92	0.68	1.127	0.643	0.623	0.524	0.915	0.78	0.837
P16435	0.826	1.671	1.249	0.517	0.399	0.422	0.755	1.489	0.532	0.949	0.66	0.32	0.189	0.403	0.816	1.041	0.787	0.569	1.274	0.834	1.069	0.512	0.921	1.033	0.569	0.516	0.83	0.575	1.056	1.064	0.699	1.519	0.609	1.096	1.324	1.012	1.08	0.671	1.669	1.148	0.86	0.653	1.077	0.609	0.542	0.467	0.822	0.719	0.828
P80723	0.824	1.689	1.137	0.534	0.422	0.342	0.678	1.241	0.38	0.687	0.432	0.313	0.145	0.358	0.453	0.537	0.569	0.464	1.042	0.678	0.809	0.336	0.697	0.819	0.516	0.455	0.668	0.583	1.012	1.032	0.557	1.23	0.664	0.945	1.418	0.943	0.948	0.565	1.687	1.055	0.889	0.714	1.086	0.677	0.549	0.482	0.75	0.6	1.164
A0A1W2PPT5	0.84	1.672	1.301	0.506	0.408	0.408	0.751	1.653	0.663	1.255	0.912	0.386	0.263	0.633	1.234	1.492	1.035	0.796	1.831	1.148	1.532	0.815	1.467	1.809	0.565	0.554	0.799	0.595	1.131	1.077	0.738	1.537	0.648	1.134	1.427	1.135	1.122	0.81	1.647	1.453	0.903	0.7	1.112	0.736	0.674	0.627	1.02	0.819	0.862
P52597	0.828	1.569	1.215	0.518	0.385	0.434	0.697	1.372	0.59	0.968	0.656	0.336	0.218	0.4	0.791	1.048	0.715	0.491	1.137	0.745	0.907	0.416	0.745	0.852	0.54	0.485	0.765	0.501	0.833	0.811	0.558	1.412	0.615	1.03	1.229	0.885	0.944	0.575	1.559	1	0.905	0.712	1.137	0.654	0.563	0.493	0.903	0.715	0.803
Q5JR08	0.85	1.575	1.261	0.517	0.385	0.436	0.704	1.364	0.56	0.876	0.631	0.307	0.208	0.38	0.785	0.979	0.787	0.515	1.189	0.844	1.046	0.475	0.892	0.962	0.581	0.512	0.744	0.578	1.006	1.018	0.71	1.397	0.582	1.074	1.28	0.936	1.041	0.652	1.518	0.999	0.878	0.669	1.131	0.648	0.551	0.49	0.865	0.742	0.76
Q9NVJ2	0.856	1.886	1.515	0.501	0.386	0.412	0.819	1.746	0.691	1.284	0.891	0.348	0.226	0.573	1.175	1.391	0.819	0.557	1.307	0.898	1.172	0.545	0.959	1.155	0.559	0.493	0.783	0.563	1.018	0.982	0.674	1.497	0.62	1.101	1.388	1.052	1.12	0.646	1.653	1.295	0.878	0.631	1.128	0.648	0.563	0.512	0.871	0.773	0.825
Q8WWM7	0.851	1.52	1.176	0.548	0.446	0.503	0.764	1.438	0.528	0.767	0.554	0.339	0.177	0.414	0.705	0.89	0.66	0.537	1.166	0.778	0.998	0.425	0.851	0.974	0.579	0.52	0.766	0.616	1.075	1.056	0.662	1.513	0.688	1.167	1.432	1.111	1.156	0.621	1.806	1.119	0.884	0.726	1.136	0.656	0.591	0.498	0.854	0.722	0.865
Q9NR12	0.894	1.765	1.407	0.522	0.368	0.408	0.688	1.542	0.532	0.918	0.628	0.323	0.201	0.402	0.751	1.026	0.792	0.592	1.351	0.865	1.098	0.509	0.962	1.141	0.568	0.518	0.805	0.582	1.068	0.994	0.668	1.524	0.634	1.133	1.367	1.028	1.134	0.678	1.724	1.197	0.892	0.699	1.136	0.695	0.635	0.539	0.979	0.774	0.826
P41240	0.922	1.785	1.397	0.547	0.42	0.418	0.805	1.64	0.593	1.004	0.733	0.349	0.216	0.496	0.893	1.145	0.841	0.599	1.356	0.924	1.144	0.576	1.029	1.162	0.549	0.504	0.786	0.581	1.031	1.02	0.684	1.548	0.654	1.129	1.399	1.124	1.108	0.714	1.685	1.231	0.913	0.696	1.13	0.661	0.63	0.562	0.916	0.777	0.879
P04792	0.788	1.639	1.173	0.455	0.352	0.397	0.64	1.249	0.582	1.009	0.668	0.352	0.201	0.44	0.728	1.006	0.644	0.468	0.989	0.634	0.85	0.351	0.729	0.783	0.487	0.502	0.684	0.515	0.906	0.845	0.569	1.372	0.602	1.029	1.224	0.957	0.987	0.568	1.565	1.057	0.867	0.761	1.129	0.655	0.561	0.466	0.813	0.713	0.853
Q9HCC0	0.828	1.614	1.221	0.552	0.418	0.395	0.708	1.495	0.735	1.237	0.891	0.36	0.248	0.605	1.119	1.411	0.798	0.578	1.299	0.855	1.097	0.512	0.947	1.043	0.565	0.48	0.738	0.561	1.029	0.983	0.641	1.463	0.644	1.113	1.386	1.08	1.173	0.697	1.739	1.182	0.945	0.687	1.105	0.686	0.634	0.579	0.928	0.761	0.839
P60953	0.891	1.715	1.32	0.482	0.367	0.363	0.763	1.487	0.63	1.172	0.803	0.327	0.194	0.486	0.958	1.234	0.825	0.577	1.306	0.873	1.093	0.493	0.934	1.078	0.555	0.49	0.769	0.578	1.013	0.96	0.651	1.409	0.63	1.065	1.363	1.017	1.055	0.607	1.512	1.141	0.915	0.664	1.085	0.619	0.55	0.484	0.782	0.705	0.868
P26368	0.845	1.602	1.282	0.503	0.378	0.409	0.714	1.419	0.615	1.102	0.733	0.325	0.199	0.5	0.977	1.196	0.75	0.532	1.214	0.772	0.983	0.455	0.877	0.916	0.588	0.511	0.799	0.547	0.975	0.934	0.643	1.489	0.644	1.125	1.367	1.063	1.069	0.673	1.551	1.118	0.906	0.705	1.135	0.688	0.571	0.528	0.92	0.762	0.856
Q5JTZ9	0.91	1.652	1.291	0.535	0.456	0.466	0.79	1.571	0.584	1.027	0.762	0.356	0.237	0.496	0.964	1.142	0.763	0.551	1.164	0.813	1.04	0.531	1.008	1.058	0.528	0.495	0.744	0.559	1.082	1.004	0.654	1.447	0.697	1.251	1.495	1.205	1.266	0.763	2.043	1.255	0.93	0.753	1.158	0.687	0.712	0.615	1.06	0.863	0.826
P61163	0.839	1.666	1.276	0.535	0.44	0.504	0.748	1.542	0.503	0.831	0.592	0.347	0.197	0.456	0.768	0.958	0.678	0.51	1.144	0.733	0.958	0.436	0.803	0.927	0.566	0.498	0.798	0.574	1.064	1.01	0.679	1.551	0.648	1.16	1.492	1.109	1.154	0.65	1.853	1.27	0.873	0.639	1.118	0.665	0.561	0.491	0.895	0.713	0.855
H0YDU8	0.85	1.543	1.224	0.518	0.42	0.425	0.831	1.4	0.615	1.021	0.733	0.353	0.219	0.515	0.973	1.139	0.764	0.533	1.169	0.836	1.034	0.483	0.887	0.963	0.574	0.498	0.819	0.56	1.009	0.973	0.617	1.491	0.652	1.124	1.401	1.053	1.114	0.659	1.609	1.222	0.9	0.677	1.127	0.661	0.599	0.535	0.925	0.775	0.807
Q01432	0.852	1.656	1.316	0.517	0.447	0.47	0.785	1.595	0.687	1.191	0.788	0.361	0.244	0.469	1.012	1.309	0.795	0.541	1.245	0.867	1.041	0.527	0.924	1.021	0.504	0.49	0.788	0.541	0.922	0.869	0.593	1.445	0.644	1.09	1.349	1.024	1.064	0.632	1.615	1.16	0.908	0.656	1.117	0.648	0.577	0.514	0.867	0.75	0.916
Q14699	0.73	1.341	1.072	0.481	0.401	0.45	0.729	1.294	0.421	0.679	0.49	0.305	0.166	0.356	0.613	0.809	0.714	0.527	1.184	0.762	0.959	0.426	0.806	0.908	0.569	0.512	0.802	0.567	0.961	0.966	0.652	1.424	0.645	1.137	1.334	1.057	1.142	0.667	1.732	1.09	0.866	0.695	1.132	0.699	0.59	0.505	0.909	0.712	0.849
Q15042	0.916	1.686	1.286	0.573	0.457	0.46	0.732	1.55	0.539	0.835	0.566	0.34	0.204	0.424	0.752	0.977	0.756	0.568	1.28	0.864	1.033	0.538	0.956	1.021	0.576	0.54	0.793	0.614	1.005	1.03	0.71	1.568	0.663	1.173	1.364	1.113	1.2	0.677	1.707	1.195	0.88	0.697	1.154	0.72	0.614	0.524	0.916	0.768	0.836
Q7Z2K6	0.869	1.678	1.293	0.527	0.427	0.433	0.777	1.564	0.664	1.183	0.85	0.359	0.251	0.561	1.048	1.317	0.943	0.648	1.457	1.041	1.293	0.663	1.138	1.236	0.53	0.497	0.769	0.548	0.994	0.985	0.66	1.452	0.607	1.077	1.27	0.992	1.131	0.598	1.57	1.035	0.942	0.665	1.073	0.708	0.642	0.523	0.912	0.754	0.829
P40763	0.907	1.829	1.416	0.551	0.42	0.44	0.741	1.678	0.743	1.262	0.91	0.36	0.233	0.597	1.106	1.465	0.792	0.588	1.238	0.927	1.118	0.562	0.943	1.108	0.561	0.486	0.792	0.553	1.032	0.984	0.634	1.545	0.617	1.077	1.304	0.987	1.053	0.62	1.563	1.146	0.905	0.625	1.075	0.608	0.571	0.53	0.877	0.769	0.835
B0I1T2	0.865	1.677	1.273	0.557	0.463	0.504	0.762	1.547	0.588	1.017	0.723	0.352	0.227	0.497	0.975	1.176	0.838	0.609	1.25	0.939	1.146	0.529	0.975	1.251	0.555	0.515	0.819	0.63	1.033	1.012	0.693	1.53	0.627	1.186	1.419	1.094	1.175	0.675	1.749	1.201	0.891	0.682	1.117	0.677	0.634	0.529	0.931	0.765	0.85
Q9NTX5	0.871	1.756	1.355	0.52	0.382	0.426	0.768	1.562	0.633	1.12	0.771	0.357	0.223	0.506	0.941	1.165	0.813	0.558	1.241	0.868	1.097	0.514	0.946	1.057	0.524	0.496	0.804	0.551	0.943	0.875	0.623	1.5	0.616	1.042	1.353	0.967	0.975	0.562	1.53	1.211	0.905	0.697	1.14	0.687	0.604	0.524	0.919	0.788	0.831
P39748	0.833	1.599	1.227	0.486	0.391	0.429	0.799	1.52	0.543	0.932	0.665	0.352	0.219	0.483	0.838	1.045	0.78	0.547	1.228	0.836	1.047	0.479	0.9	1.059	0.584	0.491	0.792	0.564	1.033	1.04	0.684	1.462	0.634	1.132	1.418	1.047	1.098	0.609	1.755	1.21	0.9	0.673	1.154	0.642	0.593	0.523	0.897	0.749	0.855
P62241	0.868	1.806	1.403	0.507	0.396	0.469	0.752	1.616	0.628	1.143	0.781	0.37	0.218	0.519	0.962	1.246	0.769	0.517	1.245	0.841	1.032	0.466	0.889	1.014	0.574	0.51	0.791	0.548	0.991	0.959	0.635	1.509	0.619	1.116	1.35	1.023	1.054	0.617	1.578	1.134	0.892	0.666	1.129	0.667	0.572	0.521	0.882	0.754	0.812
P10155	0.882	1.693	1.332	0.514	0.345	0.363	0.71	1.466	0.658	1.159	0.803	0.367	0.234	0.544	1.018	1.279	0.88	0.597	1.423	1.03	1.236	0.591	1.02	1.151	0.558	0.511	0.83	0.595	0.994	0.984	0.661	1.503	0.643	1.188	1.456	1.125	1.215	0.705	1.749	1.293	0.892	0.694	1.152	0.68	0.624	0.573	0.877	0.808	0.826
Q9BS26	0.898	1.704	1.282	0.544	0.417	0.448	0.764	1.54	0.594	1.014	0.718	0.342	0.207	0.497	0.911	1.104	0.735	0.535	1.169	0.797	1.007	0.453	0.826	1.021	0.578	0.527	0.789	0.586	1.038	0.967	0.648	1.476	0.648	1.108	1.374	1.077	1.107	0.639	1.601	1.137	0.898	0.68	1.115	0.68	0.614	0.527	0.905	0.754	0.846
Q15435	0.857	1.61	1.234	0.472	0.391	0.419	0.748	1.487	0.675	1.199	0.853	0.362	0.246	0.554	1.042	1.338	0.868	0.607	1.368	0.943	1.183	0.55	0.976	1.157	0.534	0.509	0.82	0.575	0.937	0.89	0.621	1.439	0.705	1.168	1.605	1.152	1.163	0.66	1.701	1.263	0.933	0.688	1.118	0.688	0.618	0.529	0.89	0.764	0.907
Q8NE71	0.838	1.586	1.224	0.512	0.445	0.497	0.788	1.493	0.479	0.758	0.519	0.323	0.185	0.392	0.712	0.868	0.684	0.479	1.12	0.7	0.904	0.425	0.826	0.853	0.543	0.515	0.827	0.565	1.137	1.075	0.716	1.582	0.66	1.167	1.394	1.039	1.195	0.644	1.834	1.152	0.844	0.66	1.128	0.652	0.592	0.5	0.886	0.721	0.908
P04632	0.857	1.772	1.379	0.476	0.373	0.441	0.828	1.611	0.654	1.184	0.82	0.372	0.244	0.545	1.039	1.304	0.805	0.534	1.206	0.856	1.041	0.498	0.868	1.053	0.544	0.48	0.805	0.557	0.987	0.931	0.63	1.557	0.605	1.075	1.403	1.014	1.02	0.577	1.599	1.193	0.926	0.636	1.164	0.63	0.57	0.499	0.814	0.72	0.914
Q9NYL9	0.839	1.685	1.216	0.514	0.408	0.45	0.713	1.436	0.474	0.827	0.613	0.342	0.202	0.416	0.659	0.86	0.76	0.552	1.098	0.811	0.993	0.465	0.836	0.927	0.543	0.477	0.707	0.599	0.972	0.95	0.63	1.384	0.628	1.044	1.231	0.959	1.031	0.566	1.615	1.084	0.921	0.691	1.083	0.621	0.6	0.527	0.831	0.682	0.896
Q13547	0.775	1.536	1.235	0.445	0.367	0.433	0.881	1.45	0.512	0.859	0.591	0.326	0.183	0.406	0.773	0.935	0.739	0.526	1.245	0.827	1.046	0.458	0.877	1.031	0.596	0.506	0.841	0.586	1.066	0.978	0.676	1.5	0.629	1.113	1.401	1.048	1.061	0.643	1.613	1.19	0.867	0.666	1.133	0.653	0.56	0.474	0.854	0.728	0.834
P51532	0.801	1.593	1.263	0.531	0.428	0.444	0.764	1.547	0.574	0.934	0.675	0.337	0.235	0.444	0.823	1.116	0.692	0.53	1.11	0.684	0.969	0.449	0.817	0.866	0.606	0.55	0.857	0.633	1.132	1.101	0.712	1.643	0.656	1.207	1.422	1.085	1.305	0.74	1.846	1.332	0.904	0.741	1.167	0.728	0.643	0.595	0.975	0.817	0.806
P62714	0.894	1.631	1.309	0.539	0.463	0.475	0.816	1.585	0.576	0.911	0.702	0.358	0.22	0.506	0.856	1.05	0.856	0.595	1.305	0.928	1.125	0.523	0.967	1.185	0.606	0.511	0.785	0.629	1.073	1.023	0.704	1.506	0.651	1.133	1.431	1.062	1.105	0.628	1.689	1.214	0.938	0.746	1.23	0.736	0.68	0.584	0.985	0.821	0.859
Q9UMR2																	0.858	0.567	1.305	0.923	1.004	0.585	0.821	0.934	0.773	0.618	0.705	0.644	1.069	1.231	0.841	1.605	0.493	1.02	1.173	0.9	0.98	0.598	1.2	0.917	1.134	0.81	1.425	0.934	0.755	0.745	1.042	1	0.811
Q5JTH9	0.847	1.72	1.279	0.547	0.409	0.397	0.753	1.631	0.638	1.039	0.783	0.33	0.231	0.519	0.939	1.221	1.028	0.723	1.534	1.103	1.374	0.735	1.261	1.432	0.58	0.518	0.842	0.629	1.065	1.044	0.702	1.502	0.601	1.115	1.354	1.043	1.128	0.677	1.582	1.263	0.917	0.686	1.168	0.692	0.645	0.622	0.956	0.828	0.905
B4DDD6	0.871	1.034	0.813	0.658	0.588	0.489	0.717	1.192	0.416	0.538	0.415	0.298	0.184	0.333	0.434	0.617	0.587	0.433	1.274	0.692	0.865	0.363	0.784	0.702																	0.877	0.571	1.068	0.621	0.602	0.589	0.996	0.69	0.94
P20290	0.824	1.309	1.024	0.507	0.403	0.445	0.653	1.161	0.547	0.769	0.576	0.332	0.19	0.382	0.734	0.872	0.808	0.555	1.157	0.784	0.973	0.447	0.771	0.885	0.529	0.461	0.733	0.54	0.929	0.895	0.569	1.321	0.696	1.151	1.27	1.016	1.05	0.564	1.652	1.034	0.963	0.692	1.15	0.651	0.566	0.507	0.843	0.688	0.822
P61289	0.839	1.531	1.198	0.494	0.369	0.436	0.713	1.32	0.558	0.947	0.7	0.34	0.188	0.448	0.824	1.042	0.842	0.579	1.253	0.905	1.056	0.504	0.9	1.065	0.547	0.468	0.788	0.569	0.903	0.893	0.585	1.383	0.602	1.009	1.336	0.996	0.948	0.566	1.484	1.131	0.889	0.632	1.133	0.628	0.581	0.502	0.813	0.735	0.883
P24844	0.783	1.668	1.206	0.531	0.409	0.408	0.772	1.549	0.645	1.236	0.734	0.377	0.305	0.372	1.064	1.38	0.795	0.591	1.269	0.861	1.298	0.461	0.955	1.191	0.502	0.477	0.779	0.53	0.976	0.902	0.707	1.503
H0Y5F3																																									0.897	0.685	1.129	0.693	0.498	0.501	0.821	0.655
A0A0A0MT60	0.873	1.633	1.246	0.61	0.494	0.576	0.842	1.523	0.468	0.788	0.548	0.349	0.174	0.414	0.756	0.932	0.915	0.607	1.381	0.967	1.226	0.62	1.192	1.156	0.633	0.549	0.853	0.661	1.15	1.121	0.758	1.585	0.676	1.123	1.366	1.078	1.106	0.743	1.632	1.257	0.974	0.76	1.207	0.718	0.666	0.598	1.033	0.792	0.869
P28066	0.789	1.547	1.193	0.451	0.348	0.408	0.834	1.387	0.556	1.023	0.765	0.348	0.204	0.484	0.857	1.107	0.806	0.53	1.232	0.854	1.073	0.479	0.874	1.025	0.558	0.475	0.809	0.562	1.013	0.936	0.604	1.478	0.655	1.098	1.402	1.026	1.025	0.575	1.606	1.219	0.92	0.633	1.14	0.594	0.564	0.506	0.802	0.702	0.912
O95433	0.816	1.636	1.284	0.496	0.404	0.458	0.8	1.511	0.557	0.931	0.667	0.349	0.213	0.457	0.824	1.038	0.712	0.491	1.14	0.77	0.957	0.428	0.784	0.919	0.567	0.502	0.809	0.59	0.969	0.944	0.613	1.447	0.658	1.094	1.433	1.058	1.116	0.647	1.768	1.224	0.889	0.681	1.127	0.661	0.602	0.502	0.889	0.751	0.862
Q15404	0.925	1.663	1.256	0.514	0.407	0.445	0.8	1.481	0.573	0.982	0.739	0.36	0.216	0.533	0.881	1.056	0.834	0.556	1.201	0.86	1.032	0.503	0.833	0.95	0.542	0.48	0.77	0.583	0.994	1.034	0.653	1.446	0.647	1.066	1.402	1	0.97	0.559	1.555	1.161	0.963	0.615	1.169	0.609	0.635	0.581	0.906	0.744	0.927
Q86XP3	0.866	1.766	1.381	0.552	0.394	0.419	0.786	1.637	0.638	1.122	0.801	0.359	0.229	0.585	1.019	1.289	0.75	0.589	1.306	0.858	1.153	0.497	0.959	1.093	0.615	0.557	0.848	0.647	1.116	1.093	0.731	1.556	0.616	1.153	1.405	1.057	1.194	0.674	1.804	1.234	0.9	0.752	1.196	0.734	0.752	0.614	1.032	0.934	0.849
Q96CS3	0.943	1.741	1.408	0.609	0.49	0.522	0.784	1.716	0.511	0.81	0.572	0.318	0.199	0.462	0.711	1.041	0.774	0.579	1.291	0.865	1.1	0.541	0.943	1.037	0.57	0.5	0.844	0.615	1.051	1.07	0.71	1.549	0.703	1.196	1.418	1.108	1.194	0.676	1.691	1.284	0.901	0.663	1.146	0.688	0.605	0.538	0.924	0.759	0.856
Q13085	0.887	1.754	1.343	0.485	0.428	0.333	0.803	1.693	0.712	1.351	0.9	0.36	0.244	0.54	1.146	1.393	0.913	0.733	1.604	1.109	1.671	0.889	1.458	1.545	0.582	0.548	0.745	0.658	1.013	1.106	0.76	1.455	0.615	1.045	1.217	1.085	1.082	0.629	1.434	1.217	0.853	0.701	1.123	0.665	0.626	0.574	0.973	0.892	0.817
P46926	0.923	1.861	1.344	0.479	0.388	0.391	0.777	1.606	0.699	1.302	0.916	0.372	0.249	0.543	1.093	1.448	0.973	0.679	1.481	1.067	1.337	0.659	1.155	1.274	0.537	0.483	0.77	0.542	0.936	0.931	0.618	1.434	0.693	1.104	1.308	0.995	1.09	0.651	1.606	1.177	0.906	0.659	1.143	0.648	0.61	0.547	0.912	0.788	0.822
P19623	0.881	1.633	1.269	0.541	0.408	0.49	0.755	1.518	0.77	1.334	0.936	0.349	0.23	0.676	1.277	1.455	0.879	0.613	1.457	1.005	1.253	0.561	1.086	1.209	0.564	0.514	0.863	0.586	1.041	1.003	0.689	1.489	0.712	1.156	1.428	1.112	1.102	0.674	1.58	1.256	0.892	0.691	1.125	0.688	0.608	0.542	0.965	0.757	0.844
Q53GQ0	0.897	1.709	1.319	0.521	0.372	0.542	0.693	1.74	0.57	0.982	0.664	0.333	0.2	0.488	0.772	1.221	0.86	0.578	1.299	0.873	1.052	0.578	0.9	1.164	0.596	0.553	0.835	0.587	0.976	1.068	0.638	1.644	0.677	1.09	1.348	1.041	1.016	0.676	1.565	1.182	0.88	0.652	1.071	0.61	0.521	0.502	0.75	0.753	0.859
P36871	0.861	1.697	1.262	0.527	0.428	0.485	0.826	1.475	0.551	0.887	0.65	0.353	0.226	0.439	0.78	1.001	0.735	0.531	1.178	0.789	1.066	0.444	0.89	1.009	0.587	0.548	0.824	0.61	1.067	1.016	0.721	1.565	0.678	1.186	1.382	1.102	1.264	0.723	1.866	1.202	0.918	0.72	1.135	0.67	0.68	0.553	0.968	0.775	0.838
A5A3E0	1.276	2.232	1.75	0.595	0.462	0.7	1.046	1.833	0.136	0.164	0.119	0.177	0.11	0.158	0.166	0.33	0.654	0.608	1.117	0.721	0.839	0.344	0.766	0.638	0.653	0.587	1.047	0.589	0.997	1.186	0.642	1.496	0.638	1.402	1.427	1.171	0.998	0.785	2.376	0.994	0.831	0.564	1.091	0.695	0.353	0.49	0.569	0.611
Q13155	0.837	1.635	1.282	0.479	0.423	0.383	0.755	1.5	0.706	1.217	0.909	0.372	0.309	0.524	1.062	1.351	0.831	0.57	1.249	0.828	1.077	0.547	0.921	1.068	0.57	0.536	0.784	0.575	1.002	0.982	0.636	1.47	0.615	1.04	1.268	0.993	0.973	0.653	1.541	1.1	0.92	0.688	1.183	0.687	0.683	0.549	0.973	0.783	0.839
Q8TD55	0.84	1.614	1.197	0.523	0.413	0.471	0.741	1.492	0.517	0.84	0.652	0.342	0.213	0.438	0.728	1.037	0.742	0.534	1.129	0.801	0.973	0.458	0.825	0.984	0.58	0.495	0.788	0.581	1.031	1.023	0.651	1.521	0.683	1.159	1.373	1.074	1.094	0.636	1.762	1.201	0.95	0.681	1.172	0.642	0.617	0.558	0.885	0.741	0.893
Q9UNZ2	0.851	1.484	1.153	0.515	0.478	0.541	0.792	1.417	0.466	0.702	0.518	0.325	0.195	0.415	0.634	0.826	0.71	0.561	1.117	0.727	0.975	0.443	0.869	0.944	0.594	0.518	0.835	0.631	1.151	1.098	0.761	1.546	0.666	1.154	1.371	1.062	1.288	0.659	1.967	1.207	0.97	0.72	1.165	0.71	0.722	0.606	1.049	0.825	0.829
I3L3Q4	0.899	1.707	1.343	0.588	0.39	0.576	0.528	1.297	0.404	0.562	0.416	0.263	0.276	0.233	0.472	0.643	0.543	0.397	0.987	0.439	0.651	0.389	0.567	0.492	0.495	0.457	0.701	0.482	0.807	0.761	0.533	1.189									1.033	0.677	1.205	0.681	0.605	0.58	0.909	0.765	0.634
M0R0F0	0.892	1.856	1.396	0.534	0.379	0.372	0.812	1.466	0.685	1.222	0.867	0.353	0.221	0.621	1.05	1.169	0.863	0.634	1.347	1.006	1.207	0.575	1.065	1.07	0.562	0.539	0.773	0.65	1.048	1.025	0.679	1.438	0.679	1.099	1.482	1.087	1.073	0.636	1.623	1.152	0.926	0.634	1.123	0.626	0.57	0.536	0.851	0.685	0.865
O15355	0.845	1.436	1.07	0.554	0.48	0.5	0.741	1.368	0.484	0.773	0.552	0.33	0.19	0.409	0.678	0.872	0.756	0.563	1.266	0.817	1.01	0.44	0.871	0.978	0.561	0.496	0.832	0.57	1.112	1.057	0.704	1.501	0.655	1.194	1.441	1.089	1.183	0.659	1.933	1.206	0.888	0.677	1.187	0.739	0.604	0.528	0.975	0.764	0.858
Q04760	0.852	1.688	1.35	0.498	0.35	0.433	0.702	1.496	0.735	1.319	0.905	0.341	0.232	0.604	1.16	1.386	0.817	0.511	1.209	0.862	1.075	0.498	0.843	1.005	0.516	0.45	0.757	0.519	0.913	0.879	0.584	1.355	0.624	1.04	1.314	0.96	0.948	0.511	1.4	1.117	0.899	0.613	1.12	0.599	0.577	0.497	0.774	0.68	0.893
Q14166	0.898	1.662	1.312	0.542	0.421	0.461	0.71	1.556	0.503	0.817	0.61	0.325	0.184	0.45	0.754	0.95	0.745	0.53	1.189	0.806	1.037	0.468	0.865	0.829	0.595	0.518	0.845	0.582	1.055	1.042	0.699	1.517	0.649	1.131	1.433	1.08	1.127	0.653	1.697	1.102	0.877	0.651	1.132	0.681	0.578	0.519	0.852	0.736	0.86
Q9BYT8	0.877	1.729	1.334	0.532	0.376	0.387	0.765	1.538	0.569	1.017	0.689	0.341	0.195	0.458	0.835	1.111	0.994	0.673	1.4	1.016	1.281	0.696	1.099	1.156	0.601	0.51	0.841	0.627	1.026	1.06	0.686	1.579	0.661	1.1	1.42	1.071	1.073	0.659	1.652	1.232	0.897	0.695	1.105	0.672	0.619	0.529	0.929	0.772	0.825
Q9Y295	0.798	1.526	1.206	0.483	0.345	0.388	0.642	1.344	0.567	1.021	0.738	0.377	0.215	0.458	0.813	1.075	0.825	0.58	1.321	0.89	1.128	0.528	0.925	1.093	0.556	0.51	0.792	0.583	0.984	0.938	0.619	1.47	0.635	1.11	1.362	1.033	1.102	0.67	1.606	1.167	0.914	0.709	1.105	0.688	0.633	0.562	0.929	0.768	0.838
O43615	0.769	1.432	1.072	0.496	0.394	0.504	0.653	1.31	0.551	0.934	0.678	0.368	0.211	0.427	0.789	1.047	0.682	0.499	1.093	0.714	0.936	0.41	0.777	0.881	0.513	0.482	0.735	0.536	0.988	0.905	0.605	1.468	0.651	1.148	1.361	1.04	1.258	0.701	1.884	1.264	0.915	0.727	1.136	0.643	0.633	0.556	0.881	0.837	0.852
Q6XQN6	0.835	2.181	1.628	0.508	0.407	0.396	0.806	2.009	0.601	1.105	0.722	0.384	0.239	0.504	0.997	1.29	0.854	0.645	1.366	0.913	1.183	0.564	1.014	1.211	0.584	0.556	0.841	0.644	1.174	1.085	0.743	1.69	0.62	1.063	1.271	0.95	1.066	0.619	1.823	1.234	0.855	0.692	1.106	0.724	0.655	0.632	1.128	0.945	0.858
P09467	0.877	1.602	1.203	0.561	0.43	0.457	0.746	1.39	0.486	0.776	0.581	0.348	0.212	0.359	0.69	0.881	0.771	0.528	1.036	0.826	0.918	0.437	0.821	0.88	0.541	0.505	0.783	0.539	0.907	0.901	0.639	1.421	0.631	1.086	1.317	1.044	1.14	0.666	1.518	1.193	0.895	0.696	1.12	0.659	0.615	0.519	0.82	0.724	0.812
Q13107	0.896	1.743	1.363	0.495	0.373	0.45	0.658	1.487	0.527	0.862	0.633	0.322	0.197	0.463	0.794	0.942	0.812	0.538	1.262	0.877	1.036	0.499	0.904	0.942	0.537	0.512	0.829	0.558	0.979	0.966	0.668	1.49	0.629	1.132	1.345	1.035	1.13	0.689	1.673	1.148	0.903	0.651	1.114	0.688	0.697	0.605	0.946	0.765	0.796
Q8WXF1	0.828	1.669	1.284	0.49	0.411	0.406	0.727	1.499	0.491	0.833	0.56	0.311	0.183	0.41	0.762	0.941	0.839	0.606	1.465	0.968	1.176	0.595	1.145	1.179	0.624	0.535	0.792	0.612	1.06	1.032	0.73	1.446	0.562	1.112	1.294	0.999	1.164	0.694	1.59	1.068	0.864	0.696	1.208	0.736	0.632	0.567	1.027	0.753	0.842
P10515	0.814	1.602	1.332	0.512	0.398	0.416	0.758	1.554	0.741	1.222	0.884	0.385	0.284	0.571	1.02	1.38	0.87	0.57	1.296	0.929	1.15	0.572	0.987	1.091	0.576	0.539	0.792	0.568	0.954	0.936	0.7	1.45	0.651	1.025	1.291	0.991	1.008	0.682	1.483	1.094	0.884	0.684	1.091	0.678	0.611	0.541	0.917	0.787	0.82
O00442	0.839	1.707	1.321	0.518	0.404	0.427	0.754	1.55	0.712	1.228	0.898	0.352	0.243	0.495	0.984	1.34	0.967	0.684	1.551	1.075	1.305	0.692	1.195	1.282	0.577	0.523	0.788	0.578	0.983	0.999	0.651	1.404	0.629	1.152	1.418	1.099	1.09	0.655	1.677	1.126	0.898	0.666	1.135	0.686	0.59	0.515	0.86	0.751	0.836
P18031	0.779	1.343	1.083	0.487	0.364	0.42	0.844	1.368	0.51	0.791	0.566	0.329	0.176	0.398	0.815	0.919	0.821	0.586	1.421	0.898	1.125	0.542	0.96	1.125	0.574	0.507	0.827	0.563	1.001	0.952	0.639	1.534	0.61	1.118	1.444	1.072	1.169	0.626	1.835	1.191	0.884	0.707	1.15	0.683	0.587	0.478	0.887	0.732	0.86
Q9NQC3	0.857	1.548	1.236	0.481	0.38	0.378	0.771	1.386	0.612	0.975	0.706	0.343	0.216	0.51	0.954	1.062	0.859	0.648	1.388	0.957	1.191	0.58	1.148	1.212	0.574	0.522	0.787	0.602	1.074	1.001	0.731	1.483	0.602	1.124	1.422	1.035	1.135	0.638	1.706	1.262	0.907	0.676	1.147	0.649	0.633	0.549	0.907	0.744	0.866
Q03518	0.865	1.635	1.275	0.526	0.41	0.484	0.745	1.515	0.528	0.886	0.622	0.33	0.196	0.448	0.796	1.003	0.772	0.556	1.231	0.82	0.994	0.504	0.871	1.014	0.593	0.51	0.806	0.568	1.018	1.018	0.651	1.524	0.639	1.11	1.319	0.996	1.089	0.624	1.763	1.148	0.917	0.668	1.099	0.646	0.596	0.491	0.844	0.768	0.883
P37235	0.837	1.845	1.138	0.443	0.39	0.428	0.907	1.465	0.456	0.86	0.571	0.304	0.16	0.517	0.789	0.9	0.721	0.52	1.212	0.809	0.936	0.403	0.814	0.879	0.582	0.492	0.796	0.577	1.007	0.927	0.614	1.504	0.646	0.882	1.387	0.99	0.94	0.558	1.555	1.018	0.796	0.599	1.088	0.581	0.523	0.479	0.683	0.632	0.905
Q8WUM0	0.895	1.851	1.431	0.554	0.443	0.437	0.845	1.679	0.526	0.904	0.631	0.334	0.199	0.428	0.786	0.979	0.704	0.515	1.151	0.757	0.929	0.436	0.782	0.941	0.576	0.547	0.798	0.548	0.99	0.969	0.708	1.511	0.667	0.973	1.157	0.948	1.014	0.601	1.369	1.07	0.903	0.707	1.098	0.64	0.626	0.568	0.914	0.815	0.87
O14929	0.874	1.827	1.436	0.505	0.381	0.409	0.818	1.64	0.638	1.086	0.775	0.342	0.21	0.49	0.973	1.201	0.863	0.572	1.254	0.918	1.119	0.518	0.943	1.064	0.578	0.508	0.804	0.573	0.994	0.957	0.653	1.513	0.677	1.129	1.378	1.051	1.098	0.644	1.585	1.161	0.932	0.713	1.147	0.685	0.608	0.524	0.908	0.784	0.872
P05387	0.832	1.812	1.275	0.437	0.384	0.414	0.661	1.384	0.59	1.04	0.758	0.377	0.197	0.516	0.82	1.052	0.696	0.453	0.96	0.703	0.909	0.409	0.709	0.78	0.503	0.472	0.713	0.564	0.982	1.005	0.533	1.367	0.62	1.047	1.21	0.995	0.897	0.5	1.472	1.106	0.908	0.723	1.097	0.576	0.571	0.532	0.72	0.632	1.088
P36542	0.814	1.458	1.156	0.51	0.369	0.44	0.619	1.286	0.584	0.949	0.676	0.336	0.211	0.452	0.806	1.061	0.773	0.505	1.168	0.799	0.966	0.446	0.783	0.916	0.549	0.498	0.798	0.535	0.933	0.889	0.585	1.421	0.602	1.103	1.367	1.014	1.125	0.64	1.592	1.135	0.886	0.654	1.073	0.617	0.523	0.443	0.773	0.694	0.837
Q9Y6Y8	0.88	1.801	1.413	0.513	0.412	0.423	0.857	1.626	0.495	0.876	0.588	0.324	0.202	0.449	0.806	0.934	0.76	0.544	1.212	0.8	0.993	0.479	0.875	0.991	0.572	0.503	0.83	0.579	1.083	1.004	0.698	1.523	0.649	1.145	1.418	1.078	1.194	0.651	1.848	1.238	0.872	0.656	1.103	0.653	0.585	0.527	0.888	0.728	0.864
Q14498	0.789	1.426	1.084	0.496	0.377	0.416	0.593	1.339	0.529	0.852	0.6	0.302	0.203	0.366	0.703	0.969	0.804	0.551	1.247	0.829	1.054	0.5	0.911	0.992	0.569	0.527	0.795	0.569	0.976	0.956	0.642	1.472	0.617	1.109	1.354	1.051	1.089	0.67	1.634	1.102	0.934	0.698	1.117	0.679	0.612	0.552	0.876	0.746	0.822
A0A1W2PNX8	0.915	1.798	1.431	0.551	0.426	0.37	0.857	1.647	0.543	0.891	0.663	0.34	0.194	0.429	0.863	0.987	0.938	0.659	1.3	1.032	1.334	0.747	1.097	1.297	0.57	0.501	0.745	0.567	0.989	0.94	0.686	1.425	0.641	1.117	1.349	1.117	1.096	0.618	1.728	1.232	0.91	0.697	1.168	0.674	0.658	0.53	0.869	0.783	0.864
B5MDF5	0.869	1.688	1.343	0.531	0.404	0.483	0.647	1.513	0.574	1.031	0.703	0.314	0.189	0.472	0.952	1.165	0.754	0.506	1.251	0.791	1.025	0.467	0.885	0.883	0.536	0.467	0.794	0.514	0.96	0.938	0.616	1.43	0.599	1.072	1.293	0.959	1.065	0.606	1.626	1.114	0.894	0.646	1.111	0.574	0.491	0.437	0.773	0.662	0.824
A7XZE4																																									0.938	0.675	1.109	0.628	0.652	0.482	0.846	0.728
P27694	0.849	1.58	1.25	0.567	0.454	0.53	0.728	1.439	0.489	0.796	0.549	0.325	0.194	0.423	0.73	0.873	0.699	0.528	1.168	0.733	0.953	0.414	0.783	0.841	0.587	0.518	0.813	0.595	1.037	1.043	0.657	1.469	0.674	1.147	1.464	1.075	1.164	0.681	1.823	1.253	0.862	0.705	1.219	0.733	0.653	0.562	0.98	0.77	0.845
P55036	0.9	1.785	1.4	0.543	0.419	0.436	0.781	1.605	0.564	0.964	0.67	0.343	0.209	0.449	0.883	1.029	0.825	0.592	1.299	0.857	1.074	0.516	0.943	1.139	0.6	0.528	0.83	0.603	1.118	1.067	0.708	1.547	0.67	1.137	1.382	1.122	1.207	0.689	1.675	1.243	0.909	0.688	1.176	0.7	0.596	0.533	0.913	0.771	0.838
Q15075	0.897	1.564	1.198	0.556	0.434	0.441	0.735	1.636	0.562	0.891	0.625	0.348	0.227	0.431	0.848	0.98	1.109	0.765	1.713	1.239	1.564	0.691	1.423	1.586	0.639	0.53	0.873	0.653	1.178	1.147	0.794	1.684	0.638	1.099	1.367	1.04	1.192	0.698	1.545	1.378	0.963	0.689	1.093	0.765	0.663	0.65	1.042	0.823	0.837
Q29RF7	0.812	1.45	1.095	0.473	0.395	0.407	0.712	1.306	0.605	1.014	0.717	0.344	0.222	0.459	0.855	1.066	0.902	0.613	1.322	0.953	1.17	0.626	0.999	1.052	0.583	0.526	0.828	0.611	1.005	1.005	0.703	1.481	0.63	1.097	1.299	0.951	1.043	0.618	1.578	1.161	0.917	0.704	1.098	0.658	0.675	0.581	0.912	0.751	0.872
O43399	0.766	1.589	1.167	0.383	0.325	0.403	0.638	1.284	0.511	0.948	0.659	0.336	0.175	0.383	0.728	1.003	0.708	0.504	1.077	0.701	0.92	0.407	0.769	1.021	0.5	0.483	0.719	0.534	0.927	0.829	0.563	1.451	0.619	0.943	1.246	0.955	0.928	0.502	1.545	1.08	0.879	0.644	1.116	0.559	0.543	0.429	0.73	0.634	0.843
Q15020	0.833	1.584	1.244	0.493	0.43	0.46	0.798	1.529	0.538	0.909	0.632	0.332	0.214	0.45	0.877	1.01	0.737	0.522	1.175	0.773	0.973	0.45	0.865	1.009	0.582	0.528	0.815	0.585	1.007	0.972	0.665	1.525	0.634	1.156	1.392	1.031	1.127	0.642	1.707	1.159	0.885	0.668	1.129	0.631	0.59	0.5	0.862	0.716	0.817
P52294	0.942	1.782	1.398	0.513	0.415	0.433	0.797	1.631	0.666	1.191	0.802	0.363	0.229	0.55	1.107	1.318	0.764	0.531	1.278	0.8	0.985	0.477	0.906	1.057	0.564	0.546	0.878	0.553	1.051	0.972	0.684	1.627	0.681	1.184	1.409	1.067	1.186	0.666	1.659	1.228	0.881	0.648	1.139	0.688	0.612	0.536	0.914	0.826	0.857
O14979	0.851	1.734	1.293	0.546	0.364	0.398	0.695	1.381	0.56	0.941	0.607	0.304	0.194	0.386	0.692	0.927	0.681	0.535	1.091	0.722	0.935	0.422	0.792	0.885	0.586	0.561	0.797	0.571	0.999	0.928	0.645	1.417	0.682	1.089	1.261	1.057	1.052	0.669	1.498	1.004	0.968	0.754	1.072	0.749	0.55	0.478	0.85	0.711	0.799
F6QDS0	0.784	1.426	1.076	0.461	0.4	0.456	0.746	1.292	0.603	1.003	0.699	0.363	0.204	0.466	0.874	1.07	0.785	0.553	1.285	0.856	1.059	0.492	0.905	1.075	0.552	0.519	0.794	0.566	1.013	1.003	0.675	1.483	0.656	1.098	1.362	0.973	1.135	0.63	1.701	1.15	0.883	0.681	1.098	0.664	0.606	0.542	0.907	0.748	0.843
Q9BR76	0.852	1.667	1.305	0.527	0.388	0.458	0.776	1.593	0.515	0.851	0.58	0.323	0.203	0.454	0.76	0.938	0.808	0.544	1.355	0.896	1.143	0.523	0.989	1.096	0.554	0.483	0.804	0.565	1.052	0.979	0.629	1.576	0.61	1.054	1.371	0.999	1.038	0.614	1.693	1.165	0.869	0.625	1.135	0.662	0.562	0.498	0.911	0.722	0.821
Q70J99	0.891	1.786	1.348	0.546	0.448	0.473	0.813	1.664	0.497	0.794	0.549	0.354	0.204	0.394	0.723	0.918	0.765	0.547	1.145	0.804	1.11	0.549	0.924	1.289	0.562	0.501	0.798	0.56	1.008	0.969	0.66	1.595	0.681	1.165	1.412	1.102	1.14	0.63	1.516	1.356	0.94	0.683	1.018	0.61	0.774	0.615	0.856	0.795	0.824
Q5SSJ5	0.803	1.424	1.189	0.512	0.375	0.394	0.704	1.461	0.577	0.961	0.733	0.324	0.201	0.489	0.914	1.164	0.82	0.536	1.361	0.88	1.116	0.526	1.019	1.15	0.614	0.511	0.881	0.602	1.056	1.02	0.728	1.567	0.579	1.138	1.354	0.99	1.218	0.624	1.617	1.098	0.897	0.69	1.148	0.649	0.679	0.595	0.906	0.747	0.886
P11766	0.893	1.777	1.415	0.545	0.382	0.44	0.772	1.561	0.582	1.061	0.723	0.344	0.203	0.436	0.882	1.134	0.723	0.499	1.107	0.75	0.94	0.424	0.771	0.926	0.538	0.474	0.746	0.531	0.932	0.879	0.59	1.401	0.627	1.097	1.328	0.998	1.079	0.614	1.625	1.161	0.928	0.69	1.131	0.637	0.587	0.513	0.865	0.725	0.862
Q9ULZ3	0.727	1.525	0.777	0.368	0.28	0.351	0.622	1.085	0.454	1.06	0.801	0.303	0.171	0.665	0.695	0.814	0.65	0.508	1.328	0.874	1.173	0.481	0.983	0.835	0.547	0.402	0.529	0.495	0.982	1.1	0.551	1.036	0.603	0.756	1.502	0.75	0.728	0.544	1.194	1.085	1.012	0.643	1.04	0.633	0.644	0.579	0.66	0.56	0.763
P30044	0.933	1.659	1.268	0.504	0.424	0.462	0.783	1.454	0.582	1.017	0.791	0.393	0.222	0.537	0.889	1.066	0.849	0.526	1.1	0.906	1.029	0.499	0.774	0.911	0.569	0.496	0.83	0.594	0.967	0.973	0.651	1.485	0.688	1.19	1.481	1.107	1.051	0.654	1.644	1.305	0.962	0.645	1.115	0.59	0.551	0.504	0.775	0.676	0.908
P38159	0.784	1.507	1.083	0.509	0.413	0.465	0.706	1.326	0.495	0.819	0.575	0.297	0.187	0.435	0.684	0.855	0.697	0.503	1.068	0.689	0.954	0.454	0.828	0.884	0.567	0.499	0.798	0.549	0.949	0.99	0.668	1.424	0.663	1.132	1.316	1.042	1.158	0.622	1.765	1.15	0.927	0.694	1.104	0.656	0.585	0.547	0.917	0.713	0.925
Q15233	0.811	1.579	1.13	0.449	0.415	0.437	0.705	1.404	0.54	0.999	0.652	0.353	0.223	0.428	0.768	1.07	0.826	0.639	1.335	0.875	1.086	0.542	0.998	1.191	0.595	0.512	0.781	0.589	1.019	1.018	0.676	1.501	0.541	1.074	1.349	0.906	1.002	0.643	1.539	1.084	0.821	0.666	1.178	0.588	0.546	0.547	0.87	0.649	0.737
Q9BTT0	0.891	1.739	1.332	0.506	0.36	0.398	0.808	1.528	0.709	1.255	0.846	0.368	0.23	0.507	0.983	1.312	0.852	0.56	1.271	0.883	1.028	0.525	0.894	1.027	0.526	0.477	0.766	0.567	0.945	0.899	0.625	1.421	0.65	1.102	1.354	1.082	1.089	0.632	1.547	1.193	0.934	0.652	1.134	0.652	0.584	0.495	0.851	0.738	0.773
Q16512	0.88	1.687	1.36	0.556	0.421	0.441	0.759	1.615	0.704	1.277	0.893	0.396	0.247	0.547	1.112	1.427	0.899	0.621	1.369	0.934	1.259	0.606	1.056	1.244	0.573	0.545	0.84	0.586	1.051	0.991	0.671	1.554	0.667	1.099	1.382	1.106	1.075	0.73	1.441	1.308	0.899	0.663	1.107	0.731	0.65	0.593	0.967	0.856	0.84
F8VVM2	0.808	1.249	0.938	0.555	0.332	0.464	0.525	1.212	0.519	0.537	0.537	0.314	0.139	0.405	0.773	0.697	0.629	0.466	1.347	0.713	0.765	0.438	0.78	0.587	0.571	0.483	0.801	0.505	0.824	1.002	0.599	1.162	0.49	0.871	1.068	0.899	0.773	0.624	1.311	0.829	0.787	0.584	1.08	0.655	0.427	0.469	0.831	0.701	0.894
Q9BXS5	0.888	1.692	1.334	0.534	0.404	0.419	0.791	1.511	0.652	1.181	0.807	0.343	0.244	0.575	1.078	1.269	0.866	0.576	1.344	0.956	1.216	0.54	1.019	1.222	0.576	0.526	0.83	0.588	1.15	1.072	0.741	1.576	0.65	1.163	1.439	1.093	1.076	0.641	1.556	1.241	0.855	0.624	1.124	0.682	0.647	0.581	0.977	0.775	0.88
P41218	0.829	1.537	1.166	0.526	0.413	0.449	0.771	1.392	0.589	1.051	0.699	0.352	0.218	0.487	0.917	1.15	0.763	0.544	1.224	0.813	1.058	0.498	0.901	1.031	0.574	0.518	0.759	0.555	1.002	0.99	0.657	1.372	0.615	1.161	1.328	1.023	1.128	0.671	1.68	1.177	0.895	0.673	1.104	0.665	0.598	0.522	0.888	0.723	0.825
Q96I24	0.838	1.622	1.252	0.509	0.399	0.452	0.717	1.433	0.588	1.048	0.747	0.345	0.213	0.485	0.896	1.152	0.75	0.551	1.224	0.811	1.03	0.492	0.896	1.06	0.565	0.488	0.781	0.556	1.027	0.969	0.658	1.476	0.636	1.118	1.372	1.062	1.141	0.651	1.673	1.184	0.933	0.694	1.134	0.683	0.613	0.552	0.949	0.798	0.837
Q9Y277	0.996	1.555	1.33	0.614	0.465	0.491	0.709	1.569	0.542	0.903	0.68	0.359	0.22	0.445	0.756	1.073	0.946	0.646	1.62	0.991	1.18	0.612	1.038	1.132	0.621	0.54	0.831	0.596	1.085	1.043	0.657	1.586	0.637	1	1.358	1.012	1.193	0.688	1.695	1.053	0.867	0.656	1.16	0.653	0.563	0.482	0.959	0.736	0.824
Q13492	0.876	1.587	1.218	0.531	0.42	0.452	0.811	1.502	0.569	0.966	0.708	0.328	0.209	0.497	0.91	1.019	0.833	0.592	1.338	0.945	1.102	0.562	1.028	1.111	0.578	0.478	0.779	0.607	1.008	0.971	0.689	1.429	0.701	1.122	1.425	1.128	1.084	0.69	1.69	1.237	0.922	0.664	1.168	0.685	0.639	0.577	0.855	0.745	0.857
O43684	0.816	1.644	1.291	0.482	0.374	0.425	0.733	1.47	0.539	0.96	0.674	0.313	0.184	0.435	0.874	1.046	0.812	0.561	1.274	0.838	1.066	0.52	0.913	1.063	0.561	0.499	0.801	0.546	1.005	0.955	0.636	1.449	0.623	1.096	1.322	0.992	1.109	0.618	1.619	1.124	0.87	0.675	1.105	0.628	0.563	0.508	0.846	0.739	0.842
O00487	0.848	1.611	1.245	0.509	0.406	0.426	0.705	1.476	0.631	1.181	0.869	0.369	0.236	0.492	0.905	1.303	0.785	0.521	1.227	0.834	1.029	0.469	0.851	0.997	0.551	0.517	0.791	0.564	0.982	0.924	0.625	1.478	0.624	1.143	1.313	1.045	1.043	0.634	1.57	1.153	0.884	0.69	1.082	0.6	0.532	0.486	0.832	0.718	0.839
P27635	0.867	1.872	1.46	0.497	0.4	0.459	0.779	1.695	0.566	1.079	0.71	0.315	0.204	0.486	0.906	1.142	0.806	0.586	1.324	0.832	1.106	0.508	0.937	1.143	0.578	0.492	0.793	0.594	1.017	0.965	0.657	1.487	0.62	1.135	1.299	0.994	1.114	0.627	1.696	1.106	0.903	0.672	1.119	0.642	0.576	0.514	0.891	0.728	0.832
Q15907	0.841	1.603	1.241	0.489	0.383	0.41	0.736	1.431	0.596	0.978	0.694	0.328	0.207	0.46	0.857	1.091	0.762	0.521	1.149	0.769	0.971	0.466	0.842	0.89	0.571	0.481	0.764	0.539	0.976	0.955	0.659	1.418	0.672	1.122	1.303	1.033	1.116	0.646	1.666	1.124	0.891	0.72	1.167	0.674	0.611	0.531	0.929	0.772	0.852
B4DDF4	0.827	1.621	1.125	0.43	0.337	0.375	0.765	1.377	0.606	1.069	0.851	0.367	0.205	0.524	0.871	1.055	0.816	0.555	1.202	0.907	1.115	0.498	0.926	1.059	0.522	0.449	0.697	0.549	0.906	0.894	0.542	1.293	0.621	0.98	1.356	0.944	0.889	0.486	1.348	1.074	0.942	0.674	1.159	0.564	0.581	0.521	0.778	0.67	0.874
P28070	0.863	1.708	1.357	0.513	0.366	0.445	0.741	1.525	0.63	1.109	0.741	0.339	0.198	0.474	0.895	1.192	0.777	0.506	1.168	0.808	0.986	0.468	0.814	0.954	0.545	0.506	0.785	0.547	0.952	0.904	0.588	1.448	0.649	1.081	1.332	1.012	1.001	0.592	1.485	1.166	0.869	0.656	1.091	0.613	0.532	0.454	0.787	0.686	0.807
P07741	0.848	1.688	1.318	0.513	0.375	0.396	0.746	1.493	0.641	1.19	0.789	0.351	0.229	0.515	1.059	1.286	0.758	0.508	1.13	0.806	1.032	0.464	0.831	0.951	0.557	0.513	0.761	0.556	0.971	0.97	0.658	1.483	0.672	1.048	1.29	1.025	1.079	0.614	1.605	1.161	0.903	0.677	1.133	0.69	0.635	0.564	0.938	0.774	0.868
F8W914									0.909	1.412	1.213	0.464	0.271	0.777	1.011	1.769	0.835	0.515	1.29	1.145	1.262	0.55	0.876	0.895	0.658	0.496	1.045	0.646	1.093	1.192	0.784	1.73	0.693	1.102	1.195	0.982	1.227	0.651	1.463	1.193	0.915	0.605	1.143	0.68	0.516	0.626	0.671	0.652	0.973
Q15424	0.719	1.272	0.904	0.456	0.353	0.425	0.634	1.13	0.458	0.701	0.493	0.273	0.162	0.343	0.605	0.79	0.707	0.527	1.121	0.707	0.947	0.414	0.781	0.885	0.521	0.452	0.794	0.484	0.896	0.891	0.616	1.365	0.608	1.108	1.381	0.97	1.075	0.603	1.811	1.077	0.934	0.685	1.102	0.623	0.594	0.524	0.949	0.665	0.821
P07686	0.814	1.72	1.299	0.469	0.379	0.401	0.866	1.557	0.673	1.224	0.85	0.393	0.239	0.546	0.99	1.299	0.763	0.533	1.178	0.859	1.031	0.475	0.894	1.02	0.557	0.479	0.74	0.55	0.944	0.924	0.619	1.453	0.662	1.084	1.373	1.036	1.041	0.612	1.591	1.206	0.901	0.636	1.12	0.632	0.571	0.504	0.788	0.722	0.872
Q86TX2	0.891	1.733	1.358	0.524	0.455	0.457	0.836	1.601	0.529	0.934	0.654	0.355	0.203	0.475	0.871	1.019	0.77	0.584	1.165	0.83	1.033	0.504	1.015	1.056	0.575	0.537	0.782	0.608	1.114	1.053	0.693	1.536	0.761	1.294	1.43	1.177	1.315	0.766	1.843	1.429	0.917	0.696	1.09	0.664	0.623	0.562	0.897	0.735	0.84
P39687	0.85	1.554	1.208	0.481	0.371	0.415	0.643	1.348	0.54	0.896	0.701	0.33	0.207	0.424	0.711	0.962	0.803	0.518	1.209	0.816	0.981	0.477	0.838	0.916	0.534	0.45	0.717	0.516	0.888	0.847	0.549	1.339	0.619	1.008	1.249	0.958	0.968	0.551	1.436	1.083	0.954	0.696	1.18	0.705	0.605	0.508	0.892	0.737	0.759
A0A1P0AYU5	0.855	1.535	1.21	0.542	0.475	0.498	0.706	1.471	0.56	0.97	0.698	0.354	0.222	0.465	0.84	1.08	0.828	0.623	1.353	0.886	1.174	0.582	1.044	1.193	0.613	0.566	0.814	0.628	1.067	1.078	0.751	1.55	0.641	1.154	1.402	1.08	1.176	0.666	1.832	1.239	0.87	0.691	1.131	0.684	0.655	0.561	0.937	0.793	0.83
P16278	0.864	1.721	1.384	0.534	0.407	0.45	0.828	1.586	0.722	1.333	0.904	0.351	0.246	0.592	1.179	1.426	0.917	0.634	1.267	0.971	1.274	0.614	1.076	1.34	0.583	0.509	0.798	0.58	1.058	0.994	0.703	1.531	0.753	1.114	1.361	1.112	1.193	0.705	1.669	1.22	0.93	0.704	1.192	0.715	0.646	0.569	0.932	0.817	0.919
P30050	0.861	1.574	1.188	0.523	0.389	0.452	0.637	1.316	0.585	0.968	0.676	0.343	0.237	0.482	0.882	1.043	0.864	0.571	1.265	0.866	1.097	0.524	0.935	1.041	0.534	0.482	0.723	0.502	0.909	0.877	0.593	1.422	0.658	1.111	1.249	0.973	1.078	0.593	1.768	1.055	0.924	0.702	1.137	0.638	0.592	0.49	0.837	0.719	0.881
P62917	0.807	1.511	1.151	0.501	0.385	0.436	0.702	1.336	0.519	0.832	0.62	0.314	0.194	0.391	0.674	0.909	0.736	0.52	1.229	0.76	0.957	0.427	0.81	0.929	0.588	0.529	0.774	0.561	0.986	0.947	0.611	1.469	0.634	1.145	1.371	1.024	1.135	0.638	1.704	1.086	0.906	0.688	1.146	0.682	0.6	0.555	0.929	0.733	0.858
Q9Y6G9	0.851	1.734	1.301	0.54	0.391	0.385	0.852	1.571	0.664	1.179	0.822	0.348	0.243	0.609	1.124	1.225	0.663	0.525	1.079	0.725	0.825	0.385	0.736	0.778	0.555	0.508	0.788	0.544	0.953	0.918	0.633	1.441	0.64	1.138	1.297	1.028	1.143	0.676	1.742	1.103	0.947	0.664	1.099	0.61	0.6	0.516	0.873	0.727	0.817
Q9UJZ1	0.91	1.709	1.294	0.566	0.471	0.525	0.806	1.625	0.587	1.013	0.732	0.353	0.21	0.527	0.944	1.137	0.819	0.543	1.233	0.845	1.032	0.484	0.85	1.071	0.632	0.55	0.837	0.585	1.093	1.062	0.72	1.714	0.634	1.206	1.557	1.164	1.169	0.665	1.791	1.259	0.925	0.729	1.158	0.638	0.637	0.517	0.894	0.752	0.907
O96008	0.915	1.847	1.45	0.511	0.399	0.459	0.791	1.673	0.788	1.419	0.966	0.367	0.238	0.65	1.243	1.561	0.989	0.632	1.545	1.066	1.419	0.607	1.064	1.521	0.624	0.532	0.836	0.567	1.056	1.006	0.643	1.672	0.685	1.063	1.382	1.037	1.054	0.651	1.577	1.339	0.949	0.747	1.188	0.677	0.65	0.582	0.953	0.962	0.857
Q96T76	0.862	1.573	1.184	0.577	0.498	0.467	0.807	1.555	0.611	0.96	0.694	0.368	0.316	0.508	0.776	1.158	0.81	0.58	1.273	0.876	1.09	0.563	0.948	1.107	0.613	0.548	0.835	0.64	1.084	1.156	0.728	1.604	0.603	1.124	1.371	0.979	1.106	0.65	1.729	1.141	0.919	0.675	1.139	0.694	0.661	0.57	0.98	0.801	0.85
P62993	0.857	1.682	1.284	0.483	0.36	0.395	0.766	1.443	0.651	1.129	0.789	0.36	0.218	0.522	0.907	1.185	0.758	0.501	1.129	0.775	0.93	0.432	0.802	0.925	0.554	0.478	0.815	0.564	0.972	0.934	0.615	1.496	0.682	1.103	1.369	1.008	1.073	0.614	1.584	1.158	0.889	0.672	1.086	0.623	0.579	0.485	0.855	0.724	0.816
A0A0J9YVP6	0.88	1.673	1.318	0.533	0.412	0.408	0.802	1.522	0.569	0.977	0.662	0.34	0.197	0.462	0.859	1.043	0.82	0.58	1.302	0.923	1.115	0.531	0.967	1.018	0.587	0.512	0.807	0.586	1.045	1.012	0.65	1.513	0.653	1.148	1.383	1.058	1.087	0.653	1.662	1.138	0.886	0.647	1.049	0.658	0.567	0.49	0.874	0.743	0.848
O60784	0.909	1.795	1.31	0.56	0.446	0.525	0.898	1.768	0.487	0.847	0.598	0.312	0.203	0.486	0.888	0.972	0.825	0.566	1.327	1.006	1.145	0.59	1.074	1.179	0.541	0.495	0.81	0.612	1.025	1.093	0.651	1.578	0.604	1.15	1.422	1.014	1.101	0.569	1.798	1.17	0.911	0.654	1.181	0.633	0.626	0.574	0.907	0.79	0.938
Q9BQG0	0.876	1.732	1.317	0.494	0.377	0.33	0.806	1.552	0.771	1.382	1.1	0.475	0.272	0.662	1.192	1.516	0.88	0.604	1.311	1.038	1.225	0.588	0.951	1.185	0.548	0.455	0.691	0.58	0.943	0.913	0.611	1.429	0.7	1.118	1.427	1.086	1.096	0.631	1.581	1.258	0.859	0.687	1.09	0.614	0.699	0.619	0.922	0.705	0.92
Q96T51	0.788	1.533	1.181	0.548	0.415	0.474	0.779	1.444	0.658	1.139	0.819	0.361	0.255	0.561	0.935	1.302	0.801	0.561	1.24	0.864	1.073	0.506	0.947	1.048	0.571	0.511	0.769	0.628	1.137	1.068	0.808	1.579	0.61	1.134	1.312	0.956	1.168	0.653	1.849	1.182	0.935	0.75	1.07	0.686	0.878	0.671	1.274	0.859	0.777
P41226	0.846	1.802	1.469	0.501	0.373	0.361	0.765	1.662	0.883	1.636	1.109	0.411	0.285	0.687	1.372	1.836	1.112	0.802	1.635	1.148	1.545	0.756	1.407	1.586	0.54	0.486	0.844	0.628	1.099	1.198	0.768	1.548	0.623	1.13	1.249	1.079	1.189	0.7	1.856	1.264	0.92	0.737	1.151	0.689	0.729	0.685	1.039	0.825	0.837
O00425	0.812	1.617	1.217	0.519	0.37	0.406	0.698	1.409	0.596	1.027	0.738	0.337	0.195	0.439	0.914	1.148	0.703	0.498	1.101	0.682	1.028	0.404	0.724	0.896	0.546	0.533	0.782	0.6	0.972	0.96	0.636	1.51	0.659	1.157	1.36	1.098	1.077	0.675	1.419	1.232	0.893	0.681	1.03	0.603	0.541	0.446	0.797	0.647	0.799
A0A1W2PNW1	0.845	1.639	1.266	0.536	0.398	0.377	0.755	1.543	0.673	1.281	0.878	0.392	0.285	0.554	1.153	1.379	0.86	0.603	1.342	0.957	1.225	0.604	1.073	1.262	0.556	0.507	0.82	0.597	1.045	1.019	0.684	1.517	0.7	1.173	1.362	1.145	1.302	0.716	1.713	1.343	0.895	0.645	1.071	0.635	0.632	0.567	0.893	0.775	0.882
P61020	0.86	1.456	1.156	0.525	0.437	0.507	0.767	1.38	0.517	0.778	0.546	0.334	0.208	0.391	0.699	0.836	0.759	0.525	1.275	0.866	1.039	0.485	0.949	1.004	0.539	0.53	0.898	0.595	0.98	0.957	0.699	1.442	0.649	1.139	1.445	1.062	1.154	0.655	1.767	1.211	0.901	0.674	1.128	0.678	0.647	0.536	1.004	0.792	0.841
J3KTL2	0.799	1.604	1.195	0.562	0.456	0.478	0.778	1.445	0.528	0.823	0.582	0.32	0.204	0.456	0.732	0.884	0.731	0.558	1.207	0.818	1.085	0.454	0.947	1.057	0.611	0.56	0.814	0.585	1.072	0.964	0.689	1.386	0.642	1.022	1.311	1.005	1.142	0.646	1.664	1.109	0.869	0.696	1.109	0.701	0.601	0.513	0.995	0.796	0.761
Q9Y2Z0	0.856	1.64	1.287	0.538	0.431	0.462	0.836	1.529	0.571	0.972	0.665	0.339	0.203	0.441	0.832	1.08	0.768	0.574	1.295	0.866	1.077	0.504	0.959	1.029	0.571	0.507	0.781	0.587	1.088	1.018	0.704	1.511	0.66	1.135	1.38	1.056	1.104	0.64	1.721	1.166	0.929	0.718	1.168	0.713	0.629	0.585	0.93	0.783	0.879
P61026	0.808	1.583	1.242	0.503	0.344	0.364	0.673	1.406	0.483	0.765	0.55	0.316	0.228	0.351	0.629	0.875	0.757	0.513	1.115	0.835	0.967	0.505	0.862	0.891	0.548	0.47	0.77	0.573	0.964	0.93	0.652	1.444	0.604	1.111	1.383	1.082	1.143	0.651	1.777	1.303	0.921	0.662	1.114	0.675	0.572	0.512	0.877	0.741	0.774
P61313	0.873	1.796	1.442	0.535	0.379	0.419	0.768	1.597	0.58	0.941	0.676	0.303	0.194	0.494	0.866	1.119	0.743	0.556	1.321	0.815	1.071	0.491	0.954	1.059	0.598	0.522	0.819	0.594	1.064	0.976	0.678	1.591	0.6	1.129	1.429	1.056	1.163	0.669	1.68	1.199	0.859	0.614	1.181	0.69	0.606	0.558	0.964	0.763	0.841
Q96P48	0.818	1.691	1.33	0.509	0.383	0.391	0.673	1.65	0.57	1.001	0.712	0.347	0.234	0.454	0.838	1.138	0.966	0.746	1.6	1.171	1.341	0.76	1.151	1.327	0.552	0.533	0.786	0.592	1.015	1.055	0.707	1.56	0.693	1.109	1.395	1.134	1.157	0.668	1.524	1.264	0.892	0.66	1.139	0.654	0.628	0.573	0.935	0.78	0.853
P47755	0.881	1.753	1.377	0.542	0.479	0.509	0.879	1.668	0.571	0.972	0.687	0.332	0.217	0.483	0.931	1.034	0.762	0.52	1.197	0.832	1.048	0.475	0.923	1.011	0.608	0.55	0.855	0.592	1.099	1.051	0.774	1.584	0.647	1.119	1.368	1.056	1.096	0.716	1.715	1.13	0.928	0.688	1.151	0.698	0.621	0.523	0.894	0.744	0.931
P35613	0.795	1.443	1.1	0.487	0.39	0.443	0.704	1.305	0.487	0.784	0.554	0.313	0.186	0.43	0.749	0.866	0.772	0.574	1.34	0.868	1.11	0.476	0.944	1.041	0.563	0.487	0.811	0.591	0.998	0.976	0.635	1.456	0.661	1.094	1.392	1.064	1.108	0.605	1.614	1.187	0.861	0.657	1.109	0.615	0.524	0.426	0.714	0.67	0.876
F8VZJ2	0.866	1.604	1.221	0.491	0.394	0.383	0.813	1.42	0.664	1.122	0.809	0.347	0.223	0.501	1.003	1.202	0.846	0.615	1.349	0.944	1.113	0.567	0.968	1.067	0.522	0.457	0.767	0.55	0.958	0.909	0.61	1.327	0.647	1.096	1.316	1.03	1.05	0.654	1.451	1.131	0.926	0.665	1.138	0.642	0.56	0.497	0.79	0.7	0.913
O75822	0.931	1.736	1.358	0.551	0.395	0.445	0.7	1.592	0.547	1.021	0.733	0.379	0.206	0.392	0.763	1.115	0.818	0.555	1.244	0.877	1.066	0.508	0.911	1.039	0.55	0.469	0.776	0.566	0.992	0.992	0.635	1.519	0.678	1.114	1.303	1.021	1.07	0.606	1.646	1.21	0.916	0.639	1.1	0.586	0.581	0.495	0.83	0.725	0.876
Q12904	0.842	1.709	1.3	0.528	0.391	0.432	0.753	1.504	0.574	0.965	0.672	0.322	0.196	0.467	0.881	1.026	0.834	0.568	1.266	0.893	1.1	0.516	0.941	1.072	0.56	0.512	0.807	0.609	1.031	0.997	0.665	1.488	0.613	1.137	1.394	1.073	1.089	0.602	1.656	1.192	0.915	0.64	1.118	0.643	0.591	0.506	0.857	0.705	0.887
Q9H1E3	0.776	1.189	0.917	0.519	0.422	0.458	0.69	1.153	0.439	0.547	0.382	0.298	0.17	0.287	0.472	0.63	0.705	0.499	1.052	0.711	0.91	0.378	0.779	0.771	0.547	0.445	0.759	0.619	1.074	1.052	0.737	1.432	0.67	1.237	1.433	1.03	1.315	0.651	2.196	1.21	0.905	0.687	1.169	0.646	0.598	0.507	0.958	0.658	0.803
E7EQL5									0.615	1.186	0.773	0.344	0.226	0.37	0.908	1.118									0.554	0.481	0.818	0.671	1.265	1.046	0.761	1.667									0.84	0.675	1.076	0.664	0.562	0.63	0.95	0.719	0.74
P50213	0.857	1.527	1.237	0.524	0.423	0.476	0.798	1.467	0.66	1.077	0.769	0.341	0.229	0.603	1.023	1.195	0.786	0.587	1.231	0.835	1.08	0.495	0.896	1.074	0.558	0.494	0.771	0.57	1.008	0.983	0.633	1.517	0.65	1.13	1.412	1.039	1.132	0.621	1.733	1.276	0.911	0.652	1.151	0.684	0.651	0.545	0.942	0.743	0.861
A0A2R8YEK8	0.899	1.533	1.242	0.545	0.482	0.435	0.724	1.412	0.449	0.689	0.533	0.306	0.195	0.396	0.625	0.799	0.841	0.631	1.359	0.926	1.137	0.628	1.079	1.082	0.59	0.498	0.853	0.622	1.066	1.072	0.718	1.543	0.663	1.175	1.415	1.078	1.154	0.635	1.857	1.278	0.885	0.686	1.148	0.684	0.639	0.525	0.917	0.794	0.867
P35637	0.785	1.729	1.288	0.501	0.382	0.442	0.772	1.441	0.491	0.785	0.525	0.334	0.186	0.386	0.649	0.832	0.607	0.535	1.137	0.735	0.89	0.338	0.8	0.87	0.596	0.548	0.827	0.6	1.057	1.032	0.664	1.427	0.479	0.99	1.346	0.762	0.875	0.54	1.75	1.05	0.742	0.648	1.188	0.553	0.497	0.503	0.865	0.688	0.704
H0Y2W2	0.852	1.58	1.25	0.517	0.389	0.431	0.685	1.454	0.559	0.945	0.681	0.325	0.215	0.466	0.839	1.042	0.857	0.589	1.29	0.882	1.145	0.528	0.95	1.121	0.587	0.525	0.821	0.583	1.095	1.028	0.693	1.53	0.682	1.152	1.36	1.045	1.179	0.666	1.701	1.202	0.907	0.707	1.095	0.673	0.634	0.541	0.917	0.758	0.855
P04179	0.835	1.488	1.038	0.511	0.387	0.423	0.714	1.255	0.579	0.909	0.657	0.362	0.23	0.47	0.73	0.875	0.716	0.498	1.059	0.821	0.991	0.455	0.804	0.9	0.562	0.51	0.653	0.556	0.959	0.924	0.605	1.148	0.736	1.043	1.396	1.015	0.889	0.606	1.468	1.085	0.938	0.754	1.214	0.709	0.641	0.603	0.879	0.74	0.823
P25788	0.882	1.718	1.358	0.519	0.385	0.395	0.741	1.508	0.525	0.891	0.622	0.301	0.184	0.414	0.818	0.969	0.789	0.537	1.23	0.818	1.011	0.471	0.88	0.991	0.543	0.481	0.763	0.55	0.964	0.905	0.615	1.45	0.63	1.086	1.31	0.995	1.079	0.621	1.689	1.197	0.891	0.647	1.075	0.607	0.551	0.482	0.839	0.703	0.82
A0A096LPI6	0.863	1.542	1.208	0.526	0.404	0.45	0.714	1.377	0.568	0.904	0.658	0.353	0.23	0.437	0.774	1.007	0.781	0.554	1.158	0.82	0.973	0.448	0.819	0.916	0.564	0.507	0.773	0.574	1.009	0.987	0.638	1.483	0.664	1.132	1.359	1.05	1.084	0.614	1.637	1.146	0.912	0.643	1.128	0.65	0.568	0.487	0.833	0.703	0.894
P21291	0.747	1.635	1.229	0.437	0.336	0.401	0.812	1.45	0.532	0.909	0.598	0.297	0.176	0.405	0.833	0.945	0.743	0.526	1.272	0.815	1.001	0.435	0.927	0.988	0.556	0.51	0.794	0.575	1.015	0.935	0.671	1.446	0.605	1.078	1.389	1.039	1.096	0.622	1.68	1.136	0.855	0.666	1.102	0.609	0.521	0.437	0.791	0.669	0.874
O95861	0.878	1.758	1.358	0.533	0.414	0.398	0.792	1.577	0.668	1.255	0.882	0.349	0.24	0.527	1.013	1.353	0.912	0.634	1.407	0.958	1.196	0.588	1.072	1.212	0.592	0.524	0.795	0.589	1.073	1.022	0.678	1.545	0.67	1.147	1.305	1.034	1.18	0.705	1.6	1.299	0.939	0.74	1.17	0.752	0.7	0.607	1.076	0.819	0.869
P62753	0.826	1.683	1.324	0.475	0.357	0.393	0.775	1.478	0.581	1.033	0.699	0.32	0.197	0.455	0.87	1.11	0.804	0.543	1.261	0.828	1.066	0.472	0.873	1.032	0.542	0.5	0.774	0.522	0.944	0.887	0.583	1.442	0.628	1.082	1.363	1.027	1.069	0.622	1.555	1.139	0.916	0.686	1.115	0.64	0.558	0.477	0.82	0.701	0.837
E7ESC6	0.891	1.662	1.299	0.531	0.416	0.448	0.764	1.497	0.689	1.141	0.785	0.346	0.22	0.571	0.986	1.273	0.936	0.61	1.415	1.05	1.289	0.659	1.148	1.226	0.574	0.558	0.83	0.62	1.13	1.125	0.747	1.567	0.827	1.287	1.337	1.117	1.237	0.751	1.641	1.335	0.879	0.617	1.163	0.703	0.633	0.571	0.925	0.808	0.919
P21283	0.902	1.706	1.295	0.535	0.446	0.44	0.793	1.563	0.498	0.878	0.672	0.342	0.189	0.419	0.826	1.023	0.769	0.527	1.218	0.863	1.019	0.475	0.903	1.039	0.551	0.474	0.79	0.596	1.027	0.973	0.665	1.499	0.634	1.011	1.272	0.978	1.035	0.583	1.537	1.132	0.922	0.612	1.151	0.63	0.587	0.527	0.866	0.675	0.846
P62491									0.386	0.486	0.352	0.264	0.188	0.279	0.426	0.551	0.662	0.452	1.192	0.693	0.962	0.314	0.664	0.89	0.597	0.519	0.914	0.643	1.235	1.18	0.777	1.681																	0.82
P20339	0.824	1.357	1.132	0.558	0.492	0.546	0.808	1.403	0.511	0.809	0.576	0.32	0.2	0.435	0.754	0.963	0.822	0.637	1.424	0.948	1.177	0.627	1.127	1.173	0.553	0.528	0.813	0.623	1.078	1.166	0.754	1.64	0.686	1.16	1.405	1.175	1.352	0.777	2.067	1.31	0.968	0.724	1.173	0.772	0.708	0.669	1.18	0.87	0.795
P00441	0.714	1.672	0.972	0.331	0.305	0.396	0.593	1.22	0.458	0.896	0.554	0.315	0.173	0.381	0.606	0.861	0.638	0.528	1.055	0.661	0.935	0.383	0.774	0.851	0.5	0.531	0.651	0.578	1.014	0.899	0.622	1.438	0.64	0.922	1.198	0.928	0.946	0.585	1.519	1.075	0.927	0.788	1.172	0.635	0.567	0.421	0.721	0.635	0.887
Q13148	0.816	1.488	1.161	0.482	0.395	0.433	0.764	1.395	0.502	0.858	0.586	0.329	0.201	0.398	0.696	0.931	0.608	0.461	1.04	0.662	0.849	0.354	0.706	0.791	0.566	0.504	0.797	0.54	1.052	1.021	0.678	1.495	0.615	1.106	1.334	1.023	1.16	0.658	1.724	1.147	0.888	0.711	1.134	0.714	0.654	0.592	0.977	0.782	0.851
Q9Y371	0.868	1.712	1.279	0.517	0.405	0.416	0.795	1.492	0.654	1.188	0.869	0.371	0.228	0.571	1.028	1.274	0.836	0.563	1.229	0.89	1.067	0.523	0.886	0.971	0.552	0.475	0.776	0.61	1.018	0.995	0.638	1.443	0.648	1.059	1.38	1.036	1.055	0.56	1.599	1.188	0.984	0.639	1.164	0.62	0.622	0.553	0.883	0.705	0.88
P30466	0.833	1.462	1.148	0.531	0.465	0.543	0.757	1.353	0.513	0.918	0.674	0.363	0.19	0.499	0.822	1.04	0.672	0.517	1.217	0.773	0.925	0.415	0.827	0.936	0.588	0.509	0.84	0.652	1.222	1.071	0.694	1.691	0.623	1.175	1.493	1.082	1.084	0.631	1.859	1.223	0.869	0.689	1.143	0.647	0.519	0.452	0.801	0.71	0.858
P84085	0.9	1.54	1.259	0.48	0.415	0.355	0.815	1.451	0.494	0.948	0.675	0.36	0.209	0.493	0.758	1.025	0.69	0.477	1.176	0.799	1	0.451	0.894	0.92	0.563	0.513	0.808	0.558	1.04	1.013	0.707	1.523	0.653	1.151	1.419	1.099	1.101	0.64	1.756	1.179	0.83	0.632	1.077	0.621	0.553	0.462	0.814	0.728	0.823
Q99598	0.864	1.584	1.198	0.494	0.411	0.476	0.79	1.449	0.534	0.936	0.639	0.353	0.23	0.455	0.894	1.002	0.858	0.61	1.355	0.934	1.168	0.587	0.987	1.11	0.547	0.481	0.736	0.552	0.95	0.997	0.666	1.423	0.664	1.141	1.412	1.077	1.141	0.659	1.717	1.348	0.957	0.686	1.038	0.583	0.577	0.504	0.874	0.698	0.931
P24534	0.873	1.759	1.393	0.519	0.351	0.373	0.774	1.552	0.651	1.162	0.807	0.368	0.202	0.503	0.981	1.21	0.75	0.502	1.16	0.838	0.962	0.443	0.776	0.984	0.568	0.489	0.826	0.556	0.926	0.868	0.556	1.405	0.637	1.052	1.401	1.054	0.99	0.587	1.458	1.178	0.892	0.671	1.108	0.637	0.529	0.47	0.763	0.725	0.861
O94906	0.816	1.537	1.124	0.526	0.429	0.452	0.771	1.387	0.52	0.843	0.563	0.329	0.219	0.415	0.774	0.951	0.863	0.663	1.494	1.035	1.371	0.635	1.159	1.303	0.592	0.535	0.789	0.621	1.093	1.09	0.738	1.443	0.704	1.156	1.415	1.036	1.195	0.683	1.695	1.191	0.904	0.678	1.118	0.691	0.644	0.581	0.944	0.755	0.838
P06865	0.859	1.633	1.327	0.517	0.389	0.396	0.781	1.495	0.706	1.207	0.85	0.364	0.244	0.598	1.157	1.355	0.881	0.598	1.34	0.934	1.169	0.578	1.037	1.169	0.543	0.511	0.775	0.548	1.037	0.992	0.667	1.467	0.688	1.138	1.37	1.067	1.111	0.618	1.61	1.174	0.887	0.68	1.121	0.664	0.589	0.519	0.876	0.759	0.849
O60884	0.837	1.572	1.224	0.508	0.385	0.418	0.736	1.434	0.584	0.944	0.673	0.325	0.209	0.476	0.871	1.069	0.727	0.506	1.149	0.751	0.927	0.436	0.809	0.925	0.58	0.5	0.814	0.574	1.014	0.981	0.671	1.48	0.62	1.132	1.358	1.052	1.141	0.635	1.76	1.15	0.882	0.697	1.079	0.662	0.6	0.508	0.883	0.737	0.813
P51572	0.792	1.601	1.213	0.465	0.347	0.401	0.778	1.459	0.592	1.076	0.714	0.336	0.192	0.511	0.974	1.184	0.742	0.534	1.203	0.794	1.028	0.429	0.831	1.138	0.543	0.466	0.753	0.542	1.007	0.983	0.628	1.525	0.651	1.06	1.33	0.99	1.046	0.564	1.599	1.155	0.91	0.631	1.088	0.551	0.531	0.464	0.76	0.67	0.875
O43865	0.833	1.632	1.27	0.513	0.345	0.379	0.667	1.416	0.637	1.089	0.741	0.314	0.187	0.434	0.953	1.178	0.737	0.526	1.216	0.786	1.028	0.444	0.886	1.117	0.545	0.494	0.784	0.57	1.011	0.989	0.654	1.425	0.585	1.098	1.29	0.953	1.068	0.645	1.581	1.097	0.882	0.64	1.057	0.627	0.555	0.505	0.858	0.726	0.797
P55809	0.874	1.729	1.324	0.526	0.418	0.443	0.737	1.621	0.505	0.88	0.587	0.322	0.183	0.381	0.72	0.947	0.741	0.537	1.261	0.83	1.065	0.431	0.874	1.125	0.56	0.51	0.778	0.627	1.165	1.139	0.749	1.636	0.649	1.147	1.448	1.112	1.221	0.647	1.805	1.262	0.877	0.698	1.093	0.631	0.579	0.477	0.866	0.74	0.792
Q92597	0.808	1.715	1.398	0.434	0.346	0.422	0.913	1.533	0.544	1.015	0.66	0.354	0.188	0.455	0.905	1.031	0.707	0.499	1.141	0.815	0.99	0.454	0.913	0.997	0.513	0.48	0.818	0.599	0.987	0.939	0.628	1.526	0.62	1.108	1.532	1.141	1.121	0.625	1.675	1.185	0.822	0.663	1.173	0.645	0.55	0.456	0.801	0.699	0.887
O75489	0.908	1.727	1.34	0.505	0.401	0.39	0.826	1.609	0.63	1.11	0.805	0.341	0.217	0.532	0.964	1.239	0.9	0.585	1.263	0.972	1.152	0.589	0.984	1.12	0.558	0.489	0.757	0.564	0.948	0.957	0.633	1.435	0.651	1.093	1.335	1.007	1.115	0.647	1.534	1.231	0.914	0.668	1.163	0.679	0.636	0.533	0.872	0.816	0.878
P11177	0.864	1.714	1.392	0.546	0.369	0.408	0.783	1.514	0.598	1.049	0.726	0.338	0.196	0.55	0.99	1.131	0.746	0.524	1.256	0.892	1.096	0.449	0.916	1.102	0.577	0.48	0.854	0.6	1.13	1.058	0.686	1.552	0.656	1.067	1.466	1.097	1.023	0.581	1.565	1.215	0.861	0.656	1.175	0.675	0.583	0.486	0.855	0.773	0.869
Q6Y7W6	0.921	1.806	1.371	0.565	0.504	0.528	0.83	1.749	0.507	0.757	0.528	0.353	0.217	0.414	0.667	0.912	0.699	0.579	1.196	0.761	1.066	0.449	0.9	0.919	0.614	0.538	0.894	0.659	1.181	1.153	0.755	1.701	0.66	1.212	1.465	1.12	1.293	0.674	2.117	1.279	0.865	0.713	1.138	0.705	0.629	0.559	0.98	0.784	0.862
Q9UL25	0.861	1.645	1.234	0.509	0.386	0.459	0.718	1.41	0.493	0.77	0.556	0.309	0.192	0.432	0.734	0.906	0.727	0.519	1.202	0.802	0.966	0.448	0.827	0.9	0.578	0.497	0.819	0.57	0.957	0.959	0.641	1.43	0.633	1.144	1.345	1.091	1.108	0.653	1.745	1.105	0.906	0.67	1.164	0.707	0.554	0.526	0.837	0.72	0.865
P62841	0.83	1.726	1.398	0.539	0.393	0.477	0.73	1.534	0.559	0.999	0.673	0.33	0.205	0.435	0.84	1.071	0.778	0.536	1.34	0.867	1.096	0.475	0.876	1.054	0.543	0.472	0.811	0.561	1.012	0.946	0.585	1.46	0.644	1.071	1.404	1.023	1.047	0.604	1.513	1.138	0.902	0.641	1.146	0.604	0.52	0.477	0.838	0.651	0.845
P30495	0.971	1.752	1.38	0.621	0.477	0.617	0.83	1.668	0.727	1.292	0.958	0.428	0.23	0.615	1.248	1.529	1.382	0.784	1.636	1.264	1.415	0.853	1.28	1.7	0.58	0.525	0.816	0.597	0.969	1.047	0.636	1.558	0.708	1.258	1.491	1.291	1.131	0.774	1.599	1.301	0.947	0.739	1.131	0.615	0.559	0.507	0.858	0.675	0.887
P84095	0.862	1.67	1.285	0.536	0.439	0.467	0.759	1.537	0.45	0.77	0.579	0.306	0.176	0.406	0.637	0.866	0.687	0.477	1.089	0.731	0.949	0.442	0.839	0.922	0.614	0.465	0.792	0.545	1.043	1.002	0.707	1.496	0.592	1.115	1.409	1.076	1.187	0.65	1.697	1.381	0.887	0.631	1.033	0.589	0.588	0.478	0.769	0.706	0.871
Q13619	0.879	1.554	1.203	0.513	0.406	0.457	0.768	1.463	0.547	0.928	0.672	0.337	0.23	0.409	0.759	1.046	0.857	0.593	1.203	0.857	1.079	0.569	0.955	0.932	0.597	0.569	0.813	0.581	0.993	0.955	0.681	1.558	0.644	1.212	1.477	1.081	1.217	0.728	1.758	1.195	0.925	0.719	1.12	0.731	0.615	0.559	0.914	0.706	0.844
H3BQZ7	0.805	1.589	1.212	0.524	0.41	0.409	0.752	1.495	0.564	0.945	0.661	0.331	0.223	0.51	0.951	1.105	0.784	0.551	1.278	0.838	1.146	0.576	0.965	1.224	0.549	0.505	0.808	0.528	1.029	0.946	0.666	1.398	0.631	1.064	1.272	1.037	1.116	0.643	1.624	1.099	0.877	0.679	1.095	0.721	0.614	0.557	0.982	0.729	0.867
O75663	0.792	1.567	1.248	0.48	0.363	0.435	0.744	1.413	0.527	0.84	0.584	0.346	0.195	0.394	0.698	0.916	0.693	0.485	1.133	0.742	0.956	0.409	0.793	0.895	0.535	0.481	0.78	0.554	0.971	0.928	0.602	1.464	0.663	1.124	1.374	1.04	1.113	0.633	1.708	1.189	0.883	0.632	1.144	0.637	0.557	0.479	0.795	0.71	0.868
O60684	0.774	1.502	1.187	0.491	0.409	0.459	0.827	1.432	0.787	1.618	1.126	0.397	0.301	0.673	1.46	1.837	0.925	0.616	1.519	0.978	1.372	0.658	1.273	1.388	0.623	0.55	0.886	0.648	1.074	1.078	0.796	1.63	0.706	1.339	1.636	1.229	1.377	0.799	1.875	1.345	1.005	0.775	1.125	0.837	0.64	0.688	1.207	0.832	0.806
Q9HDC9	0.859	1.624	1.273	0.551	0.399	0.47	0.78	1.484	0.517	0.854	0.606	0.335	0.204	0.451	0.742	0.947	0.737	0.531	1.169	0.834	0.994	0.48	0.962	0.94	0.546	0.48	0.804	0.607	1.033	1.014	0.706	1.518	0.685	1.111	1.332	1.075	1.09	0.643	1.692	1.126	0.872	0.673	1.123	0.671	0.605	0.517	0.872	0.784	0.827
G3V0E4	0.889	1.634	1.236	0.529	0.405	0.426	0.751	1.536	0.502	0.894	0.653	0.342	0.217	0.456	0.804	0.935	0.934	0.627	1.326	0.944	1.124	0.635	1.042	1.048	0.54	0.532	0.807	0.598	1.039	1.035	0.684	1.496	0.713	1.243	1.466	1.188	1.234	0.679	1.83	1.208	0.895	0.717	1.114	0.622	0.608	0.507	0.916	0.707	0.861
Q96RQ3	0.848	1.719	1.298	0.547	0.417	0.459	0.791	1.562	0.661	1.104	0.755	0.397	0.248	0.47	0.882	1.175	0.778	0.565	1.281	0.844	1.081	0.485	0.932	1.038	0.624	0.504	0.85	0.532	1.073	1.023	0.69	1.623	0.686	1.184	1.343	1.179	1.182	0.664	1.649	1.272	0.892	0.651	1.146	0.599	0.548	0.506	0.867	0.67	0.881
Q12979	0.862	1.557	1.207	0.531	0.415	0.467	0.744	1.45	0.644	1.171	0.817	0.376	0.254	0.577	1.021	1.302	0.816	0.546	1.211	0.893	1.079	0.574	0.92	1.024	0.542	0.518	0.769	0.541	0.947	0.898	0.614	1.486	0.673	1.081	1.311	0.972	1.066	0.641	1.531	1.137	0.86	0.658	1.07	0.595	0.576	0.516	0.84	0.722	0.788
Q8TBC4	0.897	1.785	1.393	0.537	0.411	0.419	0.871	1.64	0.63	1.059	0.772	0.356	0.231	0.544	1.024	1.207	1.022	0.65	1.559	1.074	1.376	0.766	1.299	1.326	0.6	0.495	0.835	0.553	1.09	0.985	0.715	1.683	0.644	1.107	1.396	1.127	1.153	0.704	1.528	1.326	0.952	0.716	1.111	0.744	0.678	0.587	1.017	0.871	0.854
I3L397	0.812	1.517	1.138	0.488	0.398	0.476	0.703	1.329	0.501	0.828	0.567	0.343	0.222	0.37	0.655	0.892	0.698	0.464	1.054	0.688	0.869	0.394	0.71	0.828	0.544	0.487	0.739	0.503	0.925	0.849	0.576	1.331	0.682	1.084	1.257	0.946	1.031	0.569	1.603	1.046	0.908	0.684	1.079	0.602	0.565	0.449	0.814	0.642	0.773
Q01433	0.915	1.684	1.347	0.536	0.438	0.473	0.752	1.578	0.567	0.975	0.698	0.335	0.202	0.471	0.852	1.045	0.763	0.528	1.163	0.801	0.944	0.473	0.849	0.95	0.593	0.529	0.837	0.59	1.013	0.978	0.701	1.493	0.657	1.13	1.402	1.025	1.188	0.671	1.675	1.214	0.916	0.691	1.119	0.679	0.606	0.54	0.889	0.738	0.838
Q13098	0.854	1.571	1.221	0.499	0.412	0.44	0.781	1.476	0.552	0.901	0.66	0.332	0.208	0.478	0.796	0.993	0.775	0.545	1.287	0.873	1.118	0.493	0.954	0.988	0.618	0.564	0.825	0.571	1.041	0.999	0.669	1.53	0.689	1.074	1.332	1.043	1.079	0.612	1.652	1.153	0.942	0.703	1.258	0.767	0.693	0.667	0.992	0.814	0.852
P54886	0.854	1.717	1.334	0.562	0.456	0.486	0.811	1.666	0.589	0.976	0.692	0.379	0.244	0.472	0.901	1.197	0.837	0.586	1.29	0.943	1.239	0.53	1.031	1.273	0.562	0.536	0.768	0.656	1.222	1.118	0.797	1.601	0.628	1.171	1.337	1.105	1.148	0.695	1.674	1.275	0.897	0.704	1.114	0.766	0.708	0.558	1.061	0.832	0.908
Q9H9B4	0.824	1.588	1.224	0.54	0.407	0.461	0.699	1.464	0.507	0.857	0.616	0.359	0.209	0.392	0.763	0.994	0.744	0.523	1.133	0.81	0.985	0.461	0.849	0.902	0.595	0.517	0.818	0.563	1.02	1.011	0.655	1.583	0.684	1.123	1.356	1.053	1.145	0.652	1.767	1.25	0.901	0.701	1.137	0.654	0.639	0.55	0.927	0.799	0.882
P11217																																																	0.944
Q16698	0.861	1.711	1.329	0.545	0.42	0.504	0.877	1.637	0.562	0.935	0.661	0.34	0.197	0.472	0.861	1.049	0.858	0.584	1.345	0.889	1.178	0.56	0.976	1.128	0.554	0.475	0.768	0.574	0.971	0.946	0.63	1.479	0.654	1.067	1.357	0.987	1.088	0.634	1.744	1.191	0.927	0.728	1.185	0.673	0.637	0.555	0.993	0.842	0.881
Q92688	0.794	1.55	1.242	0.482	0.343	0.437	0.698	1.384	0.6	1.008	0.795	0.373	0.234	0.465	0.83	1.158	0.816	0.519	1.167	0.849	0.998	0.504	0.831	0.892	0.562	0.482	0.788	0.549	0.934	0.895	0.613	1.401	0.627	1.077	1.287	0.98	1.005	0.597	1.533	1.088	0.91	0.592	1.05	0.595	0.58	0.517	0.907	0.807	0.717
Q16795	0.892	1.805	1.358	0.494	0.392	0.402	0.811	1.597	0.799	1.377	0.996	0.346	0.257	0.639	1.232	1.554	0.9	0.626	1.319	0.989	1.221	0.626	1.046	1.106	0.543	0.493	0.768	0.576	0.914	0.988	0.674	1.309	0.652	1.05	1.285	1.034	1.11	0.688	1.421	1.131	0.96	0.687	1.134	0.725	0.654	0.58	0.927	0.817	0.815
Q9P2R3	0.857	1.574	1.122	0.718	0.565	0.508	0.708	1.312	0.418	0.616	0.47	0.337	0.203	0.386	0.578	0.764	0.592	0.491	1.089	0.715	0.889	0.377	0.756	0.904	0.603	0.474	0.854	0.573	1.1	1.122	0.795	1.44	0.662	1.205	1.331	1.072	1.296	0.673	1.891	1.205	0.956	0.704	1.208	0.679	0.669	0.564	0.978	0.773	0.853
Q9HAV0	0.88	1.616	1.289	0.526	0.459	0.413	0.766	1.435	0.535	0.857	0.647	0.343	0.212	0.44	0.803	1.077	0.738	0.551	1.192	0.77	1.022	0.463	0.905	0.941	0.583	0.535	0.823	0.598	1.076	1.065	0.722	1.65	0.607	1.142	1.363	1.09	1.206	0.615	1.923	1.17	0.879	0.679	1.129	0.674	0.65	0.556	0.953	0.762	0.856
P49755	0.831	1.61	1.257	0.479	0.358	0.388	0.703	1.374	0.586	1.024	0.696	0.333	0.188	0.443	0.827	1.074	0.787	0.538	1.259	0.859	1.039	0.498	0.891	0.982	0.518	0.475	0.765	0.527	0.929	0.875	0.588	1.357	0.616	1.084	1.332	1.005	1.049	0.622	1.498	1.12	0.874	0.63	1.069	0.595	0.526	0.468	0.759	0.681	0.832
P06756	0.806	1.552	1.153	0.476	0.429	0.464	0.755	1.393	0.5	0.766	0.562	0.32	0.194	0.408	0.714	0.892	0.918	0.679	1.457	1.046	1.333	0.638	1.163	1.232	0.596	0.512	0.824	0.614	1.109	1.044	0.717	1.477	0.72	1.147	1.492	1.072	1.22	0.708	1.769	1.184	0.88	0.684	1.148	0.692	0.632	0.532	0.988	0.747	0.812
P51610	0.847	1.645	1.292	0.493	0.385	0.374	0.779	1.484	0.557	0.992	0.692	0.334	0.226	0.494	0.933	1.092	0.766	0.553	1.272	0.859	1.044	0.502	0.914	1.046	0.54	0.486	0.837	0.61	1.031	0.992	0.655	1.463	0.711	1.153	1.395	1.067	1.056	0.66	1.557	1.283	0.963	0.703	1.17	0.734	0.664	0.622	1.029	0.808	0.884
O76003	0.95	1.723	1.296	0.513	0.402	0.47	0.833	1.536	0.573	1.019	0.805	0.367	0.219	0.545	0.908	1.136	0.834	0.566	1.276	0.897	1.148	0.544	0.952	1.041	0.584	0.533	0.839	0.603	1.041	1.022	0.704	1.543	0.618	1.063	1.359	1.02	1.012	0.571	1.512	1.196	0.951	0.657	1.105	0.634	0.615	0.533	0.822	0.762	0.893
P55795	0.932	1.879	1.444	0.552	0.457	0.465	0.851	1.83	0.549	1.092	0.773	0.337	0.204	0.547	1.007	1.193	0.919	0.584	1.455	1.019	1.375	0.685	1.066	1.221	0.606	0.601	1.001	0.662	1.144	1.091	0.755	1.704	0.618	1.03	1.389	1.082	1.085	0.608	1.588	1.076	0.939	0.661	1.115	0.693	0.591	0.575	0.965	0.743	0.897
Q9UKV3	0.815	1.501	1.143	0.555	0.432	0.437	0.661	1.443	0.534	0.961	0.677	0.339	0.2	0.461	0.822	1.065	0.705	0.523	1.201	0.793	0.944	0.405	0.82	0.969	0.592	0.492	0.832	0.615	1.04	1.045	0.679	1.527	0.554	1.058	1.337	0.928	1.083	0.584	1.658	1.088	0.785	0.628	1.039	0.577	0.536	0.512	0.855	0.652	0.844
Q9H4E7	0.861	1.52	1.227	0.551	0.465	0.503	0.81	1.552	0.453	0.68	0.502	0.317	0.192	0.348	0.611	0.824	0.726	0.534	1.201	0.81	1.002	0.433	0.808	1.024	0.578	0.556	0.824	0.58	1.087	0.983	0.664	1.609	0.642	1.111	1.322	1.012	1.141	0.628	1.792	1.193	0.841	0.679	1.117	0.668	0.603	0.511	0.84	0.734	0.853
Q02543	0.791	1.475	1.147	0.502	0.394	0.46	0.681	1.323	0.539	0.871	0.602	0.325	0.207	0.423	0.759	0.947	0.811	0.586	1.332	0.842	1.111	0.519	0.902	1.05	0.566	0.524	0.782	0.574	1.031	0.988	0.655	1.487	0.606	1.109	1.317	1.009	1.061	0.658	1.623	1.098	0.905	0.66	1.122	0.637	0.575	0.507	0.862	0.708	0.808
Q9H993	0.857	1.559	1.229	0.473	0.409	0.433	0.867	1.391	0.55	0.989	0.688	0.358	0.219	0.452	0.858	1.07	0.682	0.474	1.063	0.716	0.867	0.4	0.724	0.938	0.547	0.493	0.778	0.583	1.001	0.921	0.611	1.468	0.614	1.05	1.225	0.983	1.076	0.602	1.482	1.367	0.898	0.664	1.109	0.612	0.599	0.503	0.805	0.781	0.832
A0A0D9SGG1	0.864	1.786	1.36	0.499	0.383	0.409	0.77	1.611	0.714	1.338	0.921	0.36	0.238	0.586	1.139	1.451	0.759	0.522	1.198	0.8	1.034	0.476	0.913	0.96	0.551	0.518	0.796	0.583	0.975	0.968	0.68	1.509	0.667	1.11	1.355	1.018	1.078	0.597	1.542	1.192	0.88	0.659	1.118	0.659	0.579	0.498	0.854	0.742	0.867
Q8TCS8	0.874	1.709	1.301	0.52	0.398	0.381	0.777	1.565	0.581	0.964	0.674	0.327	0.22	0.457	0.92	1.094	0.872	0.637	1.384	0.976	1.218	0.628	1.153	1.132	0.589	0.544	0.83	0.606	1.056	1.045	0.718	1.58	0.654	1.059	1.225	1.043	1.09	0.685	1.474	1.133	0.897	0.709	1.124	0.736	0.658	0.604	1.02	0.812	0.868
P16930	0.894	1.611	1.272	0.517	0.431	0.44	0.708	1.466	0.558	0.904	0.669	0.309	0.202	0.41	0.804	1.029	0.76	0.577	1.219	0.822	1.003	0.487	0.879	0.977	0.542	0.507	0.784	0.576	1.029	1.039	0.713	1.485	0.669	1.181	1.311	1.034	1.187	0.652	1.881	1.125	0.926	0.687	1.154	0.723	0.642	0.572	0.978	0.762	0.831
Q9NR31	0.855	1.53	1.179	0.465	0.383	0.403	0.769	1.382	0.532	0.892	0.629	0.331	0.217	0.414	0.773	0.967	0.739	0.543	1.195	0.82	1.071	0.489	0.923	1.002	0.552	0.48	0.755	0.54	0.955	0.949	0.651	1.392	0.638	1.121	1.355	1.078	1.179	0.64	1.74	1.232	0.881	0.666	1.071	0.618	0.565	0.476	0.782	0.67	0.868
Q08AM6	0.86	1.433	1.149	0.494	0.298	0.281	0.671	1.167	0.77	1.33	0.965	0.409	0.263	0.599	1.119	1.485	0.963	0.67	1.405	1.005	1.177	0.691	1.089	1.114	0.558	0.563	0.855	0.625	0.964	0.945	0.695	1.393	0.656	0.991	1.262	0.987	0.908	0.644	1.34	1.087	0.95	0.686	1.14	0.673	0.579	0.515	0.713	0.763	0.907
A0A0U1RQL8
Q8TCJ2	0.861	1.567	1.29	0.521	0.39	0.406	0.763	1.444	0.512	0.862	0.619	0.337	0.203	0.47	0.772	0.963	0.841	0.588	1.371	0.942	1.162	0.575	1.038	1.072	0.568	0.517	0.838	0.578	0.987	0.961	0.659	1.453	0.611	1.158	1.445	1.114	1.163	0.658	1.676	1.217	0.889	0.652	1.148	0.7	0.593	0.518	0.918	0.742	0.843
Q01105	0.899	1.505	1.232	0.482	0.377	0.419	0.82	1.274	0.602	1.002	0.747	0.357	0.215	0.531	0.87	1.054	0.787	0.502	1.084	0.832	0.953	0.47	0.807	0.858	0.585	0.49	0.776	0.601	0.953	0.934	0.608	1.408	0.651	1.099	1.367	1.072	1.031	0.604	1.574	1.147	0.916	0.669	1.072	0.601	0.531	0.473	0.736	0.674	0.86
K7ER96	0.843	1.573	1.247	0.514	0.369	0.46	0.778	1.443	0.544	0.839	0.591	0.307	0.176	0.423	0.758	0.91	0.762	0.529	1.215	0.821	0.988	0.465	0.836	1	0.55	0.467	0.786	0.558	1.014	0.994	0.663	1.469	0.657	1.115	1.42	1.081	1.123	0.641	1.729	1.243	0.894	0.673	1.129	0.658	0.563	0.503	0.836	0.723	0.841
P08559	0.851	1.667	1.313	0.51	0.371	0.418	0.738	1.527	0.686	1.244	0.898	0.352	0.217	0.559	1.072	1.386	0.903	0.612	1.317	1.022	1.208	0.564	1.034	1.111	0.603	0.532	0.825	0.596	1.032	1.018	0.684	1.527	0.664	1.106	1.369	1.066	1.104	0.699	1.615	1.242	0.898	0.678	1.105	0.648	0.663	0.543	0.95	0.771	0.825
P26010	0.84	1.493	1.226	0.562	0.439	0.483	0.747	1.454	0.427	0.656	0.452	0.307	0.18	0.35	0.599	0.756	0.881	0.622	1.292	0.909	1.098	0.584	1.044	1.004	0.551	0.521	0.765	0.621	1.104	1.061	0.773	1.574	0.626	1.143	1.407	1.082	1.198	0.664	1.77	1.179	0.931	0.705	1.202	0.649	0.689	0.561	0.932	0.701	0.893
H7C2N1	0.753	1.153	0.845	0.496	0.444	0.509	0.96	1.223	0.429	0.542	0.391	0.295	0.19	0.51	0.597	0.645	0.683	0.521	1.145	0.776	0.942	0.385	0.798	0.94	0.584	0.461	0.828	0.596	1.108	1.169	0.706	1.475	0.695	1.188	1.557	1.131	1.195	0.584	1.993	1.232	0.896	0.677	1.23	0.713	0.635	0.527	0.913	0.719	0.878
Q9Y2L1	0.833	1.403	1.103	0.492	0.424	0.464	0.65	1.342	0.557	0.894	0.615	0.354	0.212	0.42	0.803	1.017	0.939	0.659	1.419	1.005	1.203	0.646	1.02	1.134	0.563	0.534	0.865	0.612	1.176	1.052	0.778	1.661	0.681	1.084	1.344	1.036	1.219	0.722	1.722	1.191	0.962	0.762	1.157	0.743	0.705	0.607	1.113	0.804	0.82
Q9Y263	0.816	1.531	1.123	0.541	0.427	0.447	0.716	1.432	0.64	1.004	0.793	0.413	0.24	0.446	0.908	1.325	0.888	0.603	1.301	1.03	1.279	0.669	1.198	1.059	0.645	0.567	0.826	0.634	1.113	1.082	0.745	1.621	0.719	1.116	1.364	1.114	1.152	0.723	1.668	1.252	0.93	0.761	1.126	0.682	0.732	0.613	1.035	0.831	0.803
Q9H3S7	0.789	1.477	1.193	0.486	0.404	0.471	0.748	1.382	0.552	0.967	0.685	0.342	0.229	0.56	0.885	1.079	0.89	0.678	1.518	1.167	1.251	0.688	1.169	1.372	0.593	0.523	0.8	0.632	1.115	1.082	0.758	1.561	0.703	1.235	1.423	1.149	1.159	0.746	1.705	1.376	0.907	0.678	1.125	0.664	0.654	0.536	0.993	0.819	0.872
D6RB85	0.744	1.035	0.805	0.456	0.272	0.321	0.559	0.761	0.628	1.006	0.691	0.37	0.226	0.338	0.662	1.014	0.73	0.517	0.956	0.716	0.817	0.409	0.618	0.812	0.621	0.568	0.764	0.545	0.803	0.709	0.533	1.331	0.732	1.045	1.194	0.933	0.908	0.645	1.286	0.945	0.936	0.818	0.928	0.64	0.544	0.44	0.632	0.731	0.772
O00178	0.947	1.864	1.417	0.54	0.416	0.408	0.753	1.673	0.545	0.942	0.646	0.346	0.207	0.399	0.739	1.07	0.801	0.554	1.172	0.847	1.022	0.534	0.92	1.031	0.702	0.454	0.72	0.444	1	0.894	0.776	1.329	0.641	1.259	1.569	1.214	1.212	0.699	1.69	1.339	0.878	0.712	1.107	0.697	0.606	0.57	0.876	0.781	0.82
Q92930	0.969	1.79	1.43	0.6	0.439	0.454	0.755	1.726	0.474	0.71	0.499	0.331	0.198	0.392	0.667	0.897	0.682	0.494	1.112	0.733	0.805	0.399	0.727	0.744	0.583	0.511	0.871	0.56	1.064	1.085	0.66	1.576	0.656	1.166	1.402	1.093	1.157	0.579	1.856	1.195	0.959	0.672	1.19	0.676	0.611	0.52	0.887	0.702	0.773
Q9NQR4	0.887	1.724	1.33	0.511	0.364	0.399	0.715	1.538	0.678	1.152	0.788	0.351	0.224	0.473	1.017	1.254	0.883	0.63	1.392	0.953	1.154	0.558	1.025	1.049	0.563	0.51	0.771	0.578	1.008	0.991	0.66	1.457	0.669	1.117	1.312	1.027	1.109	0.645	1.634	1.156	0.933	0.702	1.103	0.703	0.634	0.538	0.927	0.764	0.819
Q14444	0.86	1.738	1.308	0.48	0.378	0.345	0.772	1.521	0.593	1.093	0.733	0.32	0.199	0.436	0.926	1.175	0.861	0.62	1.324	0.918	1.152	0.532	0.94	1.204	0.588	0.481	0.826	0.612	1.105	1.025	0.701	1.527	0.631	1.159	1.43	1.079	1.187	0.663	1.622	1.176	0.917	0.693	1.12	0.604	0.58	0.512	0.823	0.684	0.86
Q05209	0.825	1.506	1.156	0.527	0.473	0.455	0.705	1.32	0.535	0.873	0.642	0.339	0.197	0.439	0.745	1.037	0.805	0.553	1.251	0.903	1.091	0.538	0.89	1.118	0.551	0.487	0.843	0.567	1.008	0.967	0.634	1.618	0.612	1.115	1.368	0.992	1.117	0.618	1.768	1.23	0.954	0.707	1.083	0.643	0.577	0.55	0.811	0.784	0.847
P28482	0.831	1.769	1.319	0.504	0.411	0.434	0.79	1.572	0.609	1.049	0.752	0.344	0.205	0.501	0.902	1.146	0.828	0.57	1.243	0.881	1.035	0.541	0.932	1.01	0.552	0.505	0.751	0.564	1.021	0.985	0.642	1.481	0.669	1.2	1.401	1.124	1.151	0.703	1.711	1.23	0.936	0.687	1.145	0.656	0.59	0.507	0.876	0.759	0.858
P25787	0.86	1.638	1.299	0.523	0.385	0.435	0.719	1.396	0.539	0.943	0.672	0.344	0.208	0.427	0.841	1.024	0.791	0.53	1.222	0.817	1.012	0.484	0.869	0.967	0.539	0.491	0.729	0.529	0.951	0.913	0.614	1.347	0.612	1.071	1.283	0.986	1.038	0.587	1.616	1.128	0.921	0.681	1.168	0.663	0.619	0.519	0.923	0.742	0.897
Q10471	0.9	1.683	1.342	0.584	0.446	0.436	0.811	1.612	0.578	1.007	0.744	0.354	0.243	0.487	0.869	1.119	0.809	0.628	1.341	0.887	1.086	0.528	0.946	1.082	0.568	0.494	0.764	0.556	0.947	0.94	0.681	1.519	0.648	1.121	1.322	1.03	1.18	0.658	1.715	1.159	0.882	0.691	1.148	0.71	0.703	0.596	1.052	0.847	0.847
Q8NBQ5	0.854	1.539	1.174	0.504	0.395	0.46	0.649	1.38	0.528	0.895	0.643	0.356	0.214	0.352	0.697	1.004	0.834	0.557	1.263	0.873	1.091	0.536	0.892	1.016	0.542	0.487	0.752	0.528	0.88	0.821	0.599	1.405	0.625	1.041	1.255	0.951	1.025	0.609	1.488	1.109	0.903	0.711	1.049	0.642	0.572	0.493	0.831	0.704	0.867
Q14008	0.917	1.756	1.592	0.517	0.399	0.385	0.792	1.467	0.603	0.995	0.659	0.33	0.217	0.435	0.865	1.175	0.703	0.577	1.215	0.763	0.96	0.422	0.838	1.002	0.567	0.561	0.798	0.586	0.999	0.993	0.708	1.478	0.61	1.012	1.355	1.016	1.106	0.616	1.716	1.059	0.871	0.664	1.18	0.755	0.66	0.584	1.039	0.758	0.832
Q53EP0	0.966	2.158	1.737	0.576	0.413	0.461	0.886	1.971	0.454	0.782	0.543	0.302	0.216	0.376	0.687	0.851	0.709	0.54	1.175	0.714	0.979	0.45	0.895	1.258	0.614	0.539	0.833	0.645	1.134	1.041	0.749	1.606	0.581	1.011	1.17	0.996	1.075	0.623	1.47	1.208	0.842	0.663	1.111	0.648	0.635	0.534	0.955	0.758	0.798
P10253	0.882	1.831	1.362	0.58	0.466	0.464	0.796	1.719	0.678	1.244	0.909	0.403	0.287	0.638	1.177	1.433	0.81	0.581	1.186	0.862	1.105	0.559	0.935	1.046	0.606	0.524	0.839	0.619	1.09	1.068	0.751	1.617	0.691	1.169	1.378	1.128	1.245	0.753	1.819	1.283	0.904	0.688	1.097	0.665	0.629	0.544	0.876	0.769	0.9
E7ENQ1	0.817	1.541	1.163	0.538	0.428	0.482	0.691	1.336	0.484	0.748	0.516	0.304	0.183	0.384	0.68	0.876	0.701	0.495	1.099	0.714	0.901	0.431	0.812	0.769	0.537	0.463	0.807	0.579	1.036	1.02	0.758	1.446	0.637	1.164	1.459	1.04	1.251	0.718	1.816	1.32	0.819	0.65	1.082	0.692	0.588	0.538	0.901	0.768	0.806
Q8TAT6	0.868	1.708	1.356	0.513	0.406	0.42	0.731	1.584	0.879	1.824	1.201	0.371	0.254	0.621	1.492	1.837	0.847	0.479	1.139	0.85	1.058	0.49	0.836	0.936	0.578	0.495	0.791	0.592	1.027	1.053	0.647	1.473	0.682	1.06	1.259	1.074	1.109	0.619	1.421	1.159	0.854	0.694	1.147	0.67	0.554	0.531	0.815	0.796	0.817
Q9NZL9	0.854	1.549	1.164	0.508	0.405	0.421	0.702	1.402	0.55	0.943	0.72	0.344	0.208	0.43	0.788	1.031	0.798	0.525	1.157	0.824	0.993	0.468	0.833	0.964	0.553	0.459	0.756	0.559	0.905	0.913	0.591	1.401	0.641	1.054	1.295	0.975	1	0.561	1.522	1.108	0.935	0.653	1.086	0.588	0.573	0.503	0.814	0.689	0.865
P29966	0.856	1.481	1.128	0.52	0.432	0.506	0.745	1.379	0.385	0.615	0.422	0.298	0.155	0.363	0.655	0.656	0.646	0.5	1.136	0.715	0.949	0.372	0.767	0.88	0.573	0.492	0.764	0.597	1.097	1.071	0.687	1.493	0.769	1.205	1.489	1.138	1.152	0.555	2.192	1.209	0.916	0.708	1.171	0.619	0.558	0.472	0.839	0.664	1.048
Q9UNS2	0.866	1.556	1.199	0.497	0.405	0.424	0.721	1.385	0.552	0.897	0.676	0.353	0.204	0.44	0.837	0.986	0.846	0.553	1.284	0.882	1.075	0.515	0.922	1.101	0.585	0.501	0.749	0.58	0.992	0.995	0.656	1.411	0.717	1.129	1.46	1.089	1.135	0.608	1.676	1.275	0.901	0.651	1.086	0.615	0.568	0.496	0.776	0.671	0.851
Q99590	0.834	1.301	1.062	0.559	0.485	0.482	0.879	1.393	0.505	0.737	0.541	0.341	0.214	0.379	0.663	0.898	0.686	0.516	1.076	0.785	0.928	0.421	0.855	0.963	0.568	0.51	0.805	0.621	1.218	1.119	0.786	1.5	0.629	1.099	1.419	0.965	1.343	0.712	1.863	1.193	0.855	0.679	1.102	0.659	0.606	0.51	0.867	0.711	0.86
O75947	0.724	1.593	0.838	0.443	0.314	0.356	0.656	1.1	0.44	0.914	0.619	0.318	0.168	0.519	0.613	0.692	0.601	0.451	1.168	0.753	0.968	0.385	0.822	0.797	0.53	0.425	0.53	0.469	0.887	0.936	0.483	1.09	0.582	0.778	1.365	0.765	0.752	0.509	1.232	1.001	0.916	0.646	1.008	0.583	0.589	0.499	0.668	0.556	0.739
E9PFR3	0.952	1.828	1.628	0.597	0.386	0.362	0.816	1.675	0.557	0.966	0.664	0.331	0.226	0.45	0.919	1.063	0.877	0.595	1.392	0.917	1.191	0.577	0.991	1.152	0.571	0.524	0.815	0.583	1.003	1.028	0.674	1.5	0.601	1.052	1.357	1.002	1.054	0.58	1.592	1.235	0.937	0.683	1.216	0.642	0.67	0.544	0.918	0.675	0.818
P54727	0.817	1.516	1.148	0.438	0.382	0.421	0.646	1.326	0.561	0.966	0.715	0.338	0.203	0.428	0.847	1.079	0.804	0.498	1.158	0.812	1.034	0.439	0.781	0.944	0.522	0.446	0.761	0.581	0.958	0.951	0.611	1.368	0.644	1.063	1.34	0.994	1.025	0.572	1.61	1.133	0.913	0.635	1.112	0.599	0.579	0.503	0.822	0.687	0.843
Q13185	0.902	1.865	1.417	0.503	0.399	0.423	0.84	1.646	0.563	1.026	0.677	0.336	0.202	0.443	0.86	1.083	0.715	0.49	1.121	0.781	0.98	0.407	0.75	0.917	0.541	0.481	0.791	0.562	0.967	0.877	0.581	1.53	0.562	1.046	1.411	0.923	0.967	0.576	1.667	1.177	0.862	0.581	1.113	0.582	0.497	0.462	0.805	0.653	0.77
P22061	0.945	1.852	1.412	0.545	0.395	0.403	0.792	1.58	0.65	1.144	0.823	0.358	0.22	0.523	0.999	1.212	0.801	0.575	1.246	0.872	1.143	0.524	0.967	1.129	0.585	0.52	0.776	0.567	1.039	1.009	0.657	1.477	0.643	1.133	1.343	1.031	1.087	0.624	1.659	1.219	0.913	0.692	1.088	0.641	0.602	0.54	0.88	0.73	0.814
Q96CW1	0.814	1.557	1.193	0.495	0.381	0.399	0.708	1.42	0.574	0.977	0.687	0.341	0.207	0.453	0.824	1.099	0.818	0.561	1.253	0.86	1.029	0.53	0.9	0.963	0.548	0.523	0.776	0.553	0.972	0.949	0.652	1.405	0.649	1.12	1.285	0.998	1.089	0.627	1.594	1.094	0.904	0.673	1.057	0.609	0.559	0.473	0.824	0.681	0.805
Q2M389	0.897	1.699	1.387	0.556	0.405	0.401	0.794	1.627	0.955	1.856	1.341	0.405	0.327	0.778	1.697	2.135	1.117	0.711	1.65	1.289	1.568	0.921	1.476	1.377	0.544	0.545	0.752	0.603	1.005	1.023	0.792	1.485	0.65	1.108	1.42	1.063	1.021	0.726	1.494	1.201	0.957	0.663	1.169	0.72	0.575	0.558	0.979	0.727	0.902
Q92621	0.852	1.68	1.293	0.465	0.364	0.381	0.748	1.484	0.819	1.502	1.081	0.346	0.258	0.586	1.248	1.637	0.872	0.652	1.335	0.952	1.261	0.583	1.073	1.147	0.568	0.564	0.847	0.561	1.046	1.024	0.737	1.539	0.651	1.018	1.403	0.989	1.104	0.692	1.491	1.311	0.881	0.669	1.099	0.593	0.63	0.546	0.893	0.782	0.784
P61086	0.84	1.634	1.307	0.46	0.379	0.401	0.851	1.5	0.578	0.945	0.694	0.327	0.188	0.452	0.88	1.041	0.77	0.507	1.199	0.81	1.071	0.52	0.905	0.986	0.575	0.508	0.772	0.553	1.046	0.992	0.721	1.474	0.696	1.115	1.326	1.043	1.081	0.631	1.667	1.185	0.889	0.66	1.15	0.713	0.652	0.582	0.925	0.783	0.82
P14324	0.822	1.528	1.141	0.449	0.376	0.398	0.742	1.317	0.5	0.884	0.612	0.327	0.2	0.408	0.755	0.932	0.831	0.562	1.239	0.862	1.183	0.518	0.979	1.109	0.516	0.466	0.744	0.537	0.972	0.939	0.636	1.407	0.609	1.071	1.287	0.966	1.136	0.61	1.654	1.176	0.88	0.65	1.103	0.616	0.629	0.518	0.933	0.736	0.814
P06132	0.906	1.726	1.355	0.553	0.429	0.463	0.78	1.581	0.553	0.95	0.68	0.348	0.198	0.505	0.849	1.004	0.695	0.454	1.087	0.738	0.942	0.413	0.802	0.905	0.582	0.51	0.799	0.596	1.077	1.012	0.661	1.557	0.636	1.18	1.466	1.077	1.096	0.579	1.789	1.233	0.933	0.671	1.185	0.66	0.639	0.534	0.881	0.737	0.902
Q9UI12	0.88	1.858	1.454	0.551	0.393	0.39	0.838	1.674	0.659	1.061	0.743	0.339	0.224	0.478	0.937	1.174	0.82	0.601	1.347	0.954	1.169	0.576	0.98	1.084	0.617	0.515	0.807	0.62	1.018	1.003	0.665	1.473	0.64	1.057	1.366	1.011	1.058	0.635	1.512	1.144	0.902	0.658	1.117	0.624	0.567	0.529	0.84	0.725	0.811
Q9HB07	0.866	1.66	1.324	0.504	0.381	0.422	0.756	1.525	0.632	1.107	0.781	0.359	0.227	0.534	0.995	1.216	0.67	0.485	1.121	0.755	0.933	0.393	0.708	0.871	0.58	0.525	0.881	0.618	1.023	1.079	0.664	1.648	0.619	1.139	1.493	1.104	1.062	0.68	1.648	1.394	0.87	0.681	1.12	0.659	0.604	0.528	0.863	0.761	0.908
P17174	0.924	1.755	1.368	0.513	0.396	0.468	0.794	1.508	0.622	1.131	0.781	0.359	0.225	0.481	0.98	1.198	0.88	0.592	1.324	0.941	1.17	0.555	1.056	1.137	0.56	0.483	0.795	0.564	1.02	0.989	0.633	1.422	0.652	1.057	1.393	1.02	1.036	0.613	1.574	1.151	0.894	0.67	1.125	0.629	0.563	0.494	0.852	0.716	0.838
O43837	0.886	1.574	1.21	0.533	0.397	0.444	0.745	1.555	0.81	1.709	1.163	0.452	0.279	0.794	1.617	1.873	0.9	0.63	1.431	0.985	1.227	0.602	1.029	1.207	0.574	0.536	0.78	0.577	1.047	0.958	0.676	1.474	0.638	1.124	1.414	1.079	1.088	0.711	1.595	1.2	1.007	0.716	1.156	0.716	0.682	0.571	0.946	0.766	0.795
Q9UKG1	0.836	1.636	1.252	0.554	0.456	0.423	0.754	1.547	0.58	0.877	0.637	0.329	0.22	0.465	0.801	1.016	0.799	0.548	1.252	0.841	1.059	0.546	0.942	0.992	0.588	0.525	0.776	0.566	1.015	0.957	0.687	1.493	0.579	1.071	1.245	1.03	0.99	0.649	1.515	1.059	0.876	0.715	1.121	0.692	0.584	0.528	0.864	0.728	0.846
Q8IX12	0.837	1.594	1.223	0.504	0.435	0.443	0.784	1.517	0.489	0.828	0.617	0.345	0.192	0.41	0.696	1.016	0.629	0.48	1.111	0.715	0.899	0.41	0.791	0.866	0.59	0.476	0.796	0.602	0.979	1.046	0.714	1.509	0.602	1.117	1.539	1.12	1.084	0.575	1.958	1.219	0.855	0.675	1.075	0.634	0.537	0.488	0.838	0.718	0.836
Q15758	0.844	1.576	1.226	0.465	0.36	0.384	0.701	1.392	0.612	1.06	0.794	0.365	0.195	0.472	0.802	1.189	0.758	0.497	1.092	0.797	0.939	0.477	0.79	0.883	0.55	0.5	0.771	0.56	0.929	0.905	0.583	1.416	0.649	1.086	1.328	1.014	1.016	0.589	1.495	1.133	0.988	0.722	1.109	0.677	0.59	0.561	0.869	0.783	0.817
A0A0A0MTH3	0.895	1.694	1.334	0.525	0.405	0.431	0.797	1.498	0.54	0.956	0.682	0.342	0.206	0.414	0.801	1.057	0.845	0.541	1.342	0.961	1.082	0.527	0.883	1.114	0.538	0.498	0.826	0.572	0.927	0.899	0.616	1.501	0.624	1.088	1.363	1.001	1.005	0.58	1.551	1.111	0.888	0.659	1.126	0.648	0.597	0.525	0.857	0.763	0.821
Q00325	0.826	1.613	1.323	0.479	0.348	0.402	0.71	1.385	0.556	0.951	0.678	0.32	0.205	0.466	0.873	1.072	0.724	0.478	1.203	0.764	0.963	0.437	0.784	0.971	0.541	0.494	0.793	0.544	0.961	0.922	0.626	1.486	0.594	1.055	1.314	0.961	1.035	0.588	1.593	1.119	0.874	0.632	1.106	0.627	0.578	0.479	0.857	0.723	0.757
P30086	0.853	1.796	1.435	0.547	0.396	0.432	0.766	1.555	0.672	1.099	0.729	0.351	0.23	0.498	0.976	1.166	0.693	0.549	1.188	0.763	0.949	0.425	0.86	0.936	0.555	0.575	0.774	0.582	1.05	0.929	0.646	1.385	0.69	1.121	1.301	1.044	1.159	0.675	1.813	1.139	0.844	0.768	1.158	0.72	0.603	0.495	0.939	0.805	0.831
P30154																	1.222	0.773	1.428	1.394	1.497	1.04	1.423	1.476	0.433	0.391	0.726	0.512	0.812	0.78	0.691	1.421	0.632	1.075	1.486	1.018	1.119	0.69	1.324	0.985
P62280	0.809	1.556	1.213	0.463	0.374	0.429	0.735	1.392	0.558	0.946	0.65	0.324	0.204	0.41	0.806	1.039	0.76	0.502	1.125	0.736	0.952	0.431	0.817	0.887	0.574	0.492	0.77	0.548	0.977	0.919	0.625	1.464	0.623	1.097	1.324	1.01	1.048	0.601	1.646	1.091	0.929	0.688	1.148	0.629	0.563	0.514	0.896	0.691	0.867
P53582	0.883	1.757	1.361	0.533	0.44	0.474	0.768	1.681	0.536	0.964	0.637	0.341	0.225	0.483	0.875	1.127	0.811	0.571	1.288	0.86	1.121	0.526	1.004	1.078	0.599	0.531	0.799	0.596	1.095	1.034	0.724	1.615	0.632	1.087	1.321	1.067	1.22	0.696	1.753	1.171	0.924	0.709	1.118	0.688	0.661	0.548	0.939	0.792	0.809
Q8WU90	0.817	1.564	1.224	0.486	0.412	0.46	0.798	1.433	0.49	0.825	0.591	0.325	0.187	0.386	0.745	0.936	0.727	0.505	1.213	0.773	0.96	0.44	0.825	0.984	0.558	0.514	0.818	0.584	1.006	1.004	0.627	1.443	0.62	1.145	1.399	1.07	1.194	0.651	1.817	1.19	0.902	0.683	1.12	0.689	0.593	0.513	0.853	0.753	0.812
Q9UJY5	0.853	1.763	1.444	0.542	0.423	0.482	0.894	1.587	0.581	1.017	0.735	0.431	0.217	0.495	0.95	1.261	0.804	0.514	1.175	0.87	1.058	0.482	0.838	1.243	0.536	0.502	0.852	0.621	1.015	1.027	0.66	1.733	0.596	1.031	1.269	1.002	1.043	0.631	1.569	1.35	0.891	0.631	1.151	0.607	0.603	0.527	0.89	0.771	0.933
P48047	0.878	1.631	1.263	0.52	0.373	0.423	0.727	1.417	0.624	1.072	0.774	0.371	0.233	0.475	0.903	1.178	0.763	0.53	1.226	0.817	1.024	0.488	0.838	0.922	0.581	0.494	0.76	0.536	0.933	0.908	0.601	1.402	0.684	1.025	1.325	1.003	0.992	0.555	1.461	1.108	0.976	0.663	1.139	0.602	0.633	0.54	0.843	0.725	0.923
P33241	0.926	1.396	1.04	0.596	0.472	0.606	0.813	1.383																									0.772	1.366	1.766	1.284	1.402	0.608	2.567	1.217	0.863	0.731	1.13	0.667	0.635	0.536	0.89	0.708	0.915
A0A1W2PS43	0.848	1.458	1.099	0.467	0.392	0.431	0.726	1.31	0.587	0.982	0.709	0.362	0.206	0.463	0.837	1.12	0.828	0.55	1.23	0.886	1.085	0.502	0.882	1.047	0.526	0.47	0.771	0.545	0.935	0.943	0.584	1.427	0.61	1.008	1.288	0.946	0.936	0.493	1.509	1.114	0.891	0.609	1.125	0.563	0.563	0.487	0.746	0.652	0.912
O60711	0.852	1.537	1.191	0.509	0.431	0.509	0.72	1.408	0.469	0.611	0.524	0.329	0.162	0.414	0.531	0.757	0.785	0.582	1.33	0.91	1.184	0.516	0.951	1.036	0.524	0.464	0.753	0.575	0.948	0.941	0.634	1.342	0.651	1.075	1.364	1.006	1.138	0.638	1.677	1.104	0.936	0.742	1.14	0.674	0.62	0.525	0.971	0.771	0.87
P28288	0.853	1.602	1.27	0.487	0.419	0.409	0.739	1.512	0.647	1.118	0.827	0.367	0.205	0.577	1.059	1.231	0.792	0.544	1.262	0.864	1.077	0.502	1.017	1.04	0.575	0.516	0.783	0.588	1.039	1.009	0.689	1.503	0.647	1.096	1.234	0.948	1.16	0.682	1.602	1.112	0.918	0.684	1.124	0.692	0.633	0.534	0.948	0.793	0.839
P28062	0.891	1.652	1.324	0.553	0.444	0.477	0.751	1.525	0.54	0.86	0.615	0.326	0.214	0.458	0.818	0.972	0.888	0.634	1.476	0.976	1.258	0.57	1.084	1.25	0.595	0.508	0.821	0.61	1.175	1.11	0.757	1.594	0.662	1.164	1.431	1.132	1.28	0.694	1.999	1.278	0.919	0.674	1.188	0.687	0.607	0.52	1.024	0.796	0.844
A0A0G2JLB3	0.833	1.584	1.234	0.511	0.411	0.426	0.705	1.452	0.744	1.269	0.867	0.376	0.256	0.551	1.091	1.432	1.127	0.798	1.653	1.257	1.603	0.836	1.33	1.611	0.564	0.544	0.812	0.565	0.979	0.966	0.633	1.529	0.668	1.141	1.376	1.069	1.155	0.654	1.662	1.247	0.906	0.653	1.122	0.655	0.611	0.556	0.942	0.762	0.871
P43897	0.888	1.855	1.464	0.568	0.463	0.446	0.825	1.676	0.699	1.096	0.794	0.405	0.236	0.471	0.939	1.21	0.922	0.636	1.45	0.983	1.223	0.594	1.035	1.307	0.559	0.443	0.749	0.53	1.003	0.962	0.591	1.403	0.648	1.09	1.359	0.939	1.049	0.71	1.547	1.239	0.878	0.692	1.121	0.593	0.521	0.525	0.795	0.729	0.827
P52888	0.854	1.632	1.273	0.538	0.458	0.496	0.773	1.535	0.591	0.968	0.713	0.354	0.215	0.466	0.859	1.095	0.819	0.581	1.287	0.927	1.144	0.539	0.971	1.097	0.552	0.49	0.81	0.566	0.991	0.961	0.674	1.513	0.684	1.117	1.358	1.017	1.044	0.659	1.577	1.141	0.893	0.683	1.155	0.686	0.623	0.532	0.934	0.798	0.868
D6RBZ0	0.781	1.578	1.186	0.459	0.4	0.454	0.72	1.309	0.512	0.864	0.561	0.326	0.26	0.403	0.713	0.893	0.647	0.451	0.976	0.643	0.806	0.387	0.681	0.708	0.557	0.493	0.766	0.545	0.925	0.938	0.591	1.327	0.652	1.115	1.325	1.044	1.002	0.574	1.62	1.037	0.95	0.678	1.084	0.619	0.529	0.483	0.761	0.644	0.854
Q9P0L0	0.799	1.8	1.14	0.455	0.351	0.422	0.727	1.355	0.54	0.997	0.617	0.35	0.183	0.504	0.754	0.823	0.611	0.5	1.073	0.776	0.974	0.386	0.784	0.897	0.499	0.499	0.681	0.574	0.967	0.951	0.618	1.204	0.616	0.935	1.224	0.858	0.826	0.516	1.402	1.011	0.952	0.789	1.184	0.666	0.609	0.56	0.874	0.661	0.914
P43487	0.806	1.616	1.218	0.508	0.406	0.411	0.906	1.429	0.676	1.128	0.818	0.367	0.228	0.605	1.08	1.206	0.725	0.52	1.175	0.829	1.007	0.44	0.825	0.971	0.598	0.471	0.775	0.6	1.04	0.974	0.673	1.433	0.685	1.076	1.342	1.05	1.065	0.583	1.61	1.094	0.888	0.679	1.117	0.638	0.557	0.465	0.78	0.663	0.883
O94826	0.775	1.473	1.134	0.475	0.374	0.426	0.763	1.341	0.496	0.819	0.585	0.311	0.17	0.4	0.769	0.883	0.797	0.55	1.248	0.848	1.08	0.493	0.916	1.119	0.549	0.481	0.768	0.578	1.039	0.997	0.658	1.487	0.646	1.105	1.398	1.025	1.186	0.626	1.8	1.28	0.899	0.65	1.125	0.611	0.59	0.503	0.857	0.723	0.884
Q9Y2B0	0.91	1.618	1.289	0.542	0.44	0.471	0.816	1.556	0.488	0.775	0.599	0.353	0.205	0.409	0.67	0.884	0.73	0.516	1.128	0.763	0.943	0.428	0.785	0.902	0.569	0.496	0.778	0.586	1.043	1.001	0.67	1.47	0.627	1.088	1.393	1.095	1.102	0.625	1.748	1.171	0.923	0.662	1.104	0.621	0.586	0.51	0.808	0.701	0.888
Q92905	0.876	1.562	1.348	0.552	0.381	0.422	0.834	1.368	0.579	1.003	0.693	0.341	0.222	0.469	0.975	1.144	0.91	0.599	1.418	1.009	1.17	0.586	1.016	1.148	0.534	0.498	0.779	0.521	0.973	0.885	0.664	1.406	0.625	1.072	1.328	1.038	1.004	0.689	1.426	1.152	0.882	0.669	1.148	0.693	0.617	0.551	0.904	0.776	0.851
A0A0U1RQX8	0.85	1.789	1.342	0.535	0.394	0.423	0.8	1.529	0.561	0.97	0.686	0.381	0.222	0.473	0.902	1.08	0.764	0.528	1.216	0.829	1.018	0.465	0.848	1.016	0.562	0.517	0.823	0.58	1.028	0.976	0.676	1.552	0.663	1.13	1.35	1.073	1.112	0.645	1.674	1.174	0.891	0.669	1.109	0.605	0.586	0.501	0.824	0.711	0.809
P32119	0.823	1.468	1.156	0.486	0.399	0.429	0.702	1.342	0.567	0.925	0.663	0.332	0.202	0.425	0.692	0.947	0.784	0.536	1.211	0.829	0.969	0.45	0.812	0.965	0.545	0.46	0.702	0.501	0.936	0.885	0.593	1.37	0.633	1.084	1.287	0.963	1.044	0.579	1.606	1.077	0.952	0.697	1.145	0.636	0.591	0.508	0.888	0.727	0.819
O15511	0.888	1.71	1.351	0.526	0.405	0.444	0.754	1.48	0.628	1.063	0.774	0.34	0.23	0.546	0.978	1.178	0.823	0.563	1.286	0.885	1.089	0.489	0.902	1.115	0.535	0.466	0.732	0.542	0.941	0.868	0.598	1.433	0.638	1.107	1.363	1.023	1.039	0.56	1.659	1.188	0.914	0.681	1.094	0.607	0.595	0.493	0.828	0.699	0.819
P04080	0.562	1.586	0.914	0.31	0.214	0.276	0.422	1.041	0.35	0.676	0.415	0.181	0.123	0.364	0.483	0.613	0.424	0.34	1.252	0.443	0.809	0.295	0.765	0.656	0.503	0.416	0.526	0.392	0.852	0.986	0.499	1.091	0.464	0.604	1.306	0.624	0.773	0.604	1.161	0.94	0.897	0.634	0.913	0.707	0.67	0.504	0.707	0.555	0.55
P0CG38
H0Y4R4																	1.143	0.668	1.484	0.991	1.275	0.697	1.284	1.24	0.546	0.479	0.693	0.454	0.907	1.034	0.598	1.324	0.677	1.123	1.058	0.873	1.054	0.645	1.72	1.047
J3KRX5	0.81	1.652	1.28	0.474	0.379	0.383	0.752	1.431	0.55	0.989	0.686	0.324	0.193	0.465	0.891	1.019	0.815	0.528	1.243	0.826	1.029	0.463	0.874	1	0.584	0.487	0.767	0.547	0.952	0.939	0.589	1.417	0.631	1.092	1.3	0.951	1.003	0.601	1.579	1.104	0.92	0.682	1.121	0.623	0.53	0.491	0.858	0.697	0.847
R4GMQ1	0.873	1.781	1.417	0.523	0.434	0.406	0.758	1.652	0.688	1.231	0.864	0.417	0.262	0.678	1.101	1.425	0.962	0.702	1.581	1.052	1.452	0.713	1.178	1.479	0.529	0.54	0.731	0.579	0.858	0.96	0.681	1.475	0.827	1.325	1.476	1.335	1.346	0.798	1.715	1.408	1.045	0.677	1.371	0.786	0.649	0.736	1.256	0.921	0.799
P30405	0.797	1.542	1.17	0.495	0.341	0.415	0.612	1.337	0.604	1.017	0.661	0.363	0.211	0.426	0.743	1.114	0.695	0.486	1.118	0.676	0.901	0.38	0.705	0.881	0.517	0.5	0.725	0.467	0.859	0.804	0.525	1.407	0.616	1.06	1.293	0.941	0.936	0.541	1.53	1.1	0.973	0.688	1.14	0.586	0.57	0.462	0.838	0.679	0.798
A0A087WVM4	0.898	1.635	1.329	0.487	0.359	0.3	0.782	1.433	0.826	1.498	1.089	0.403	0.266	0.588	1.21	1.676	0.977	0.686	1.399	1.117	1.287	0.631	0.981	1.118	0.597	0.508	0.753	0.562	1.011	0.971	0.678	1.508	0.664	1.085	1.326	1.154	1.063	0.672	1.582	1.266	0.924	0.721	1.086	0.731	0.704	0.689	1.109	0.867	0.816
O94874	0.918	1.876	1.497	0.534	0.429	0.43	0.8	1.725	0.744	1.351	0.966	0.397	0.247	0.661	1.265	1.493	0.914	0.644	1.447	1.029	1.217	0.638	1.14	1.106	0.629	0.513	0.809	0.611	1.102	1.11	0.732	1.507	0.647	1.138	1.412	1.087	1.145	0.67	1.626	1.177	0.931	0.66	1.112	0.647	0.657	0.562	0.877	0.73	0.94
P18463	0.918	1.462	1.123	0.508	0.505	0.547	0.814	1.363	0.845	1.177	0.894	0.265	0.328	0.731	1.18	1.536	1.512	1.296	2.392	1.88	2.008	1.068	2.17	2.038	0.576	0.561	0.96	0.62	1.397	1.313	0.968	1.728	0.579	1.139	1.402	1.061	1.391	0.723	2.17	1.092	0.765	0.641	1.164	0.794	0.674	0.552	1.158	0.722	0.765
P61019	0.863	1.66	1.249	0.532	0.414	0.39	0.695	1.47	0.596	1.061	0.806	0.351	0.233	0.425	0.9	1.16	0.86	0.575	1.258	0.926	1.16	0.56	1.001	1.15	0.575	0.539	0.78	0.582	1.078	1.003	0.713	1.523	0.713	1.112	1.296	1.035	1.122	0.686	1.616	1.186	0.933	0.701	1.115	0.655	0.608	0.546	0.903	0.786	0.865
Q13303	0.905	1.703	1.29	0.51	0.414	0.449	0.807	1.553	0.603	1.059	0.753	0.347	0.222	0.498	0.91	1.165	0.779	0.523	1.202	0.859	1.043	0.483	0.87	1.074	0.543	0.473	0.77	0.553	0.971	0.966	0.631	1.451	0.635	1.128	1.337	1.046	1.102	0.654	1.641	1.227	0.933	0.685	1.163	0.671	0.621	0.564	0.957	0.762	0.883
Q15286	0.859	1.492	1.157	0.482	0.387	0.388	0.718	1.363	0.454	0.748	0.545	0.318	0.173	0.29	0.561	0.799	0.683	0.481	0.996	0.692	0.834	0.401	0.733	0.69	0.766	0.597	0.895	0.68	1.313	1.291	0.866	1.571	0.688	1.186	1.369	1.042	1.157	0.656	1.878	1.121	0.922	0.689	1.066	0.628	0.564	0.491	0.882	0.76	0.929
Q9HBI0	0.913	1.676	1.355	0.484	0.359	0.351	0.865	1.483	0.605	1.046	0.764	0.36	0.232	0.498	0.947	1.141	0.907	0.599	1.376	1.01	1.17	0.635	1.015	1.186	0.588	0.531	0.79	0.551	0.926	0.835	0.608	1.432	0.656	1.009	1.373	1.047	0.986	0.62	1.374	1.116	0.904	0.652	1.096	0.668	0.605	0.517	0.818	0.793	0.898
P00390	0.894	1.55	1.23	0.57	0.45	0.402	0.783	1.41	0.785	1.31	0.918	0.425	0.31	0.631	1.139	1.557	1.015	0.712	1.46	1.094	1.284	0.666	1.185	1.3	0.616	0.545	0.8	0.599	1.039	0.979	0.697	1.482	0.639	1.119	1.392	1.059	1.231	0.652	1.754	1.195	0.946	0.714	1.178	0.699	0.651	0.581	0.911	0.815	0.866
O00303	0.84	1.466	1.144	0.554	0.47	0.453	0.794	1.385	0.587	0.965	0.687	0.332	0.202	0.48	0.929	1.081	0.8	0.562	1.248	0.889	1.058	0.51	0.956	1.045	0.616	0.538	0.807	0.618	1.161	1.06	0.72	1.537	0.693	1.123	1.363	1.117	1.15	0.68	1.647	1.212	0.918	0.675	1.116	0.683	0.609	0.522	0.871	0.741	0.856
P53999	0.805	1.634	1.251	0.48	0.323	0.386	0.623	1.287	0.616	1.064	0.68	0.346	0.197	0.46	0.777	1.065	0.709	0.494	1.057	0.766	0.916	0.421	0.742	0.896	0.506	0.482	0.727	0.514	0.817	0.798	0.53	1.277	0.664	1.035	1.265	0.984	0.943	0.576	1.449	1.13	0.858	0.702	1.088	0.607	0.51	0.44	0.77	0.697	0.803
Q9NZM1	0.785	1.789	1.396	0.582	0.401	0.426	0.777	1.666	0.506	0.87	0.65	0.342	0.226	0.405	0.707	0.98	0.725	0.49	1.166	0.753	0.901	0.442	0.813	0.946	0.542	0.479	0.776	0.604	1.058	1.001	0.681	1.586	0.59	1.044	1.274	0.978	1.087	0.636	1.625	1.108	0.894	0.71	1.117	0.69	0.679	0.551	0.974	0.833	0.834
Q969V3	0.863	1.82	1.459	0.535	0.42	0.399	0.806	1.728	0.696	1.283	0.892	0.379	0.267	0.634	1.021	1.359	0.834	0.601	1.267	0.873	1.18	0.57	1.033	1.172	0.547	0.524	0.793	0.562	1.005	0.957	0.633	1.443	0.638	1.055	1.242	1.01	1.065	0.638	1.566	1.125	0.896	0.705	1.125	0.743	0.717	0.582	1.009	0.819	0.862
P51153	0.824	1.687	1.333	0.497	0.355	0.361	0.792	1.529	0.675	1.231	0.854	0.347	0.216	0.589	1.065	1.323	0.824	0.57	1.317	0.909	1.192	0.535	0.996	1.25	0.528	0.473	0.79	0.526	0.946	0.929	0.617	1.483	0.638	1.066	1.386	1.053	1.062	0.602	1.561	1.181	0.874	0.675	1.107	0.655	0.605	0.545	0.923	0.767	0.818
P26373	0.862	1.739	1.349	0.492	0.383	0.388	0.779	1.542	0.535	0.902	0.615	0.311	0.198	0.47	0.885	0.97	0.794	0.553	1.265	0.83	1.027	0.48	0.926	1.004	0.571	0.5	0.799	0.592	1.044	1.022	0.666	1.508	0.615	1.164	1.387	1.076	1.157	0.65	1.713	1.131	0.872	0.655	1.116	0.664	0.582	0.51	0.867	0.706	0.808
Q6PI48	0.829	1.648	1.275	0.52	0.383	0.427	0.741	1.448	0.639	1.07	0.742	0.357	0.232	0.488	0.896	1.205	0.879	0.572	1.302	0.945	1.146	0.582	1.037	1.104	0.573	0.516	0.76	0.584	0.971	0.907	0.652	1.531	0.65	1.133	1.367	1.066	1.091	0.694	1.554	1.163	0.923	0.645	1.168	0.67	0.534	0.487	0.844	0.642	0.822
Q8WZA9	0.87	1.585	1.143	0.5	0.5	0.553	0.74	1.46	0.413	0.685	0.533	0.313	0.174	0.367	0.595	0.742	0.7	0.538	1.129	0.782	0.979	0.441	0.84	0.944	0.53	0.46	0.739	0.664	1.079	1.1	0.723	1.423	0.635	1.168	1.403	1.074	1.288	0.643	1.922	1.273	0.906	0.666	1.169	0.676	0.65	0.544	0.919	0.769	0.86
P46783	0.883	1.648	1.247	0.527	0.467	0.463	0.847	1.467	0.584	1.001	0.671	0.342	0.201	0.524	0.789	1.09	0.753	0.544	1.105	0.737	0.991	0.406	0.861	1	0.595	0.495	0.85	0.543	1.026	0.973	0.627	1.466	0.589	1.087	1.386	1.02	1.199	0.571	1.799	1.146	0.895	0.664	1.148	0.669	0.623	0.536	0.92	0.775	0.796
G3V0I5	0.845	1.596	1.194	0.515	0.432	0.496	0.755	1.476	0.554	0.997	0.729	0.35	0.217	0.471	0.937	1.184	0.976	0.63	1.425	1.078	1.343	0.61	1.218	1.249	0.518	0.472	0.792	0.537	0.96	0.941	0.65	1.455	0.67	1.138	1.462	1.056	1.127	0.623	1.793	1.254	0.91	0.662	1.177	0.673	0.675	0.558	1.068	0.855	0.971
A6NFX8	0.875	1.638	1.35	0.523	0.437	0.478	0.795	1.51	0.587	1.042	0.743	0.33	0.23	0.472	0.94	1.119	0.745	0.503	1.144	0.81	0.95	0.452	0.788	0.886	0.503	0.482	0.777	0.511	0.946	0.887	0.616	1.43	0.615	1.007	1.228	0.946	0.996	0.561	1.618	1.12	0.9	0.672	1.131	0.639	0.617	0.517	0.871	0.751	0.944
Q8IXB1	0.832	1.367	1.097	0.525	0.434	0.481	0.774	1.365	0.505	0.815	0.562	0.361	0.205	0.381	0.622	0.96	0.934	0.641	1.255	0.924	1.078	0.65	0.907	1.202	0.567	0.534	0.78	0.56	1.023	0.981	0.691	1.468	0.626	1.015	1.249	0.974	1.029	0.594	1.444	1.068	1.065	0.733	1.15	0.679	0.6	0.593	0.819	0.891	0.83
Q02750	0.789	1.554	1.11	0.419	0.386	0.448	0.916	1.388	0.535	0.944	0.618	0.302	0.228	0.383	0.916	0.956	0.732	0.475	1.122	0.747	0.949	0.445	0.824	0.911	0.555	0.502	0.751	0.552	0.982	0.891	0.625	1.481	0.641	1.107	1.33	1.014	1.164	0.638	1.825	1.21	0.857	0.662	1.064	0.634	0.524	0.467	0.759	0.694	0.819
O14776	0.86	1.727	1.332	0.547	0.414	0.395	0.741	1.603	0.801	1.384	0.961	0.389	0.259	0.69	1.264	1.564	0.885	0.626	1.44	1.007	1.237	0.607	1.132	1.183	0.603	0.487	0.796	0.585	1.169	1.086	0.718	1.479	0.629	1.123	1.325	1.063	1.084	0.664	1.67	1.184	0.903	0.662	1.163	0.671	0.625	0.54	0.962	0.756	0.87
Q12769	0.817	1.747	1.321	0.521	0.43	0.439	0.786	1.591	0.711	1.204	0.892	0.365	0.244	0.567	1.025	1.401	1.078	0.752	1.563	1.174	1.486	0.798	1.244	1.484	0.564	0.503	0.815	0.622	1.006	0.936	0.63	1.594	0.711	0.967	1.306	0.971	1.098	0.715	1.387	1.29	0.947	0.679	1.083	0.691	0.658	0.561	0.956	0.813	0.79
A0A024RCR6	0.92	1.638	1.24	0.573	0.519	0.498	0.794	1.464	0.489	0.74	0.59	0.35	0.221	0.413	0.679	0.853	0.696	0.516	1.089	0.742	0.897	0.422	0.756	0.871	0.604	0.559	0.83	0.677	1.195	1.143	0.742	1.595	0.644	1.116	1.464	1.108	1.229	0.638	1.713	1.288	0.913	0.649	1.164	0.659	0.675	0.617	0.969	0.823	0.896
P16949	0.835	1.698	1.141	0.463	0.345	0.35	0.712	1.322	0.554	0.979	0.629	0.327	0.184	0.507	0.686	0.795	0.727	0.523	1.024	0.782	0.968	0.421	0.819	0.911	0.527	0.463	0.618	0.541	0.939	0.874	0.554	1.14	0.71	0.934	1.314	0.894	0.944	0.589	1.513	1.116	0.925	0.708	1.101	0.597	0.551	0.497	0.733	0.58	0.986
Q96M27	0.956	1.783	1.362	0.529	0.402	0.358	0.803	1.604	0.592	0.988	0.731	0.328	0.237	0.45	0.938	1.14	0.77	0.561	1.237	0.864	0.977	0.505	0.837	1.139	0.583	0.496	0.814	0.64	1.05	0.979	0.642	1.452	0.583	0.967	1.35	0.948	0.932	0.548	1.213	1.17	0.926	0.656	1.077	0.611	0.601	0.523	0.881	0.738	0.81
P10599	0.845	1.747	1.381	0.502	0.355	0.43	0.759	1.53	0.679	1.15	0.796	0.346	0.237	0.461	0.995	1.22	0.873	0.54	1.235	0.903	1.086	0.513	0.849	0.982	0.539	0.466	0.784	0.517	0.882	0.849	0.546	1.367	0.67	1.056	1.366	0.992	0.981	0.56	1.473	1.16	0.943	0.615	1.072	0.563	0.515	0.432	0.656	0.626	0.824
P04222	0.944	1.613	1.236	0.616	0.535	0.563	0.731	1.661	0.472	0.748	0.516	0.345	0.219	0.38	0.67	0.884	0.72	0.559	1.202	0.73	1.019	0.487	0.874	0.936	0.596	0.534	0.845	0.586	1.175	1.141	0.756	1.764	0.672	1.174	1.312	1.01	1.126	0.673	1.66	1.276	0.933	0.707	1.144	0.711	0.74	0.609	0.975	0.844	0.94
P26583	0.768	1.568	1.18	0.469	0.357	0.403	0.708	1.347	0.489	0.816	0.572	0.294	0.182	0.372	0.713	0.854	0.781	0.583	1.345	0.816	1.093	0.489	0.935	1.082	0.523	0.445	0.779	0.569	0.985	0.951	0.613	1.32	0.64	1.057	1.359	0.999	1.09	0.59	1.658	1.174	0.91	0.634	1.113	0.611	0.541	0.458	0.789	0.656	0.832
Q15185	0.878	1.51	1.212	0.515	0.38	0.408	0.762	1.299	0.633	1.05	0.756	0.359	0.21	0.486	0.833	1.114	0.702	0.491	1.064	0.781	0.901	0.414	0.747	0.89	0.567	0.508	0.751	0.574	1.002	0.962	0.667	1.401	0.692	1.106	1.323	1.032	1.013	0.6	1.534	1.041	0.879	0.69	1.157	0.709	0.576	0.513	0.941	0.75	0.796
Q9UBQ7	0.909	1.636	1.272	0.552	0.415	0.499	0.818	1.569	0.581	0.944	0.667	0.357	0.224	0.474	0.848	1.073	0.763	0.525	1.104	0.822	1.044	0.5	0.867	0.975	0.576	0.53	0.823	0.605	1.081	1.002	0.678	1.538	0.701	1.195	1.409	1.061	1.248	0.676	1.898	1.199	0.918	0.641	1.093	0.631	0.521	0.501	0.803	0.716	0.884
Q16539	0.848	1.772	1.424	0.536	0.397	0.419	0.797	1.681	0.537	0.921	0.661	0.337	0.195	0.428	0.841	1.055	0.768	0.568	1.218	0.832	1.026	0.466	0.896	1.025	0.547	0.507	0.804	0.547	0.972	0.938	0.591	1.513	0.668	1.153	1.313	1.023	1.128	0.642	1.658	1.188	0.881	0.695	1.113	0.676	0.609	0.512	0.893	0.752	0.85
Q13217	0.801	1.56	1.153	0.479	0.34	0.317	0.664	1.291	0.604	1.002	0.678	0.285	0.21	0.495	0.951	1.083	0.773	0.526	1.218	0.833	0.97	0.447	0.851	1.039	0.544	0.482	0.785	0.578	0.948	0.884	0.608	1.418	0.655	1.088	1.282	1.038	1.095	0.642	1.644	1.181	0.883	0.684	1.13	0.649	0.568	0.489	0.831	0.76	0.837
Q9HB40	0.876	1.674	1.177	0.5	0.406	0.351	0.727	1.456	0.666	1.151	0.816	0.38	0.268	0.534	0.966	1.329	0.842	0.6	1.286	0.922	1.135	0.575	0.986	1.096	0.529	0.479	0.739	0.575	0.956	0.935	0.619	1.448	0.674	1.012	1.322	0.962	1.005	0.601	1.438	1.176	0.968	0.663	1.118	0.614	0.618	0.564	0.83	0.682	0.807
Q8N766	0.804	1.451	1.322	0.496	0.388	0.231	0.631	1.397	0.579	0.925	0.729	0.376	0.25	0.576	0.823	1.083	0.947	0.605	1.443	1.037	1.302	0.735	1.219	1.124	0.522	0.499	0.778	0.49	0.856	0.94	0.563	1.372	0.761	1.165	1.29	1.052	1.214	0.722	1.566	1.125	0.855	0.698	1.175	0.672	0.649	0.567	0.943	0.84	0.854
Q92797	0.897	1.638	1.234	0.542	0.464	0.504	0.764	1.565	0.501	0.804	0.594	0.305	0.211	0.42	0.686	0.976	0.829	0.61	1.312	0.973	1.176	0.58	1.032	1.098	0.644	0.586	0.849	0.622	1.21	1.193	0.768	1.659	0.677	1.152	1.445	1.15	1.143	0.731	1.806	1.283	0.976	0.761	1.157	0.697	0.73	0.668	0.9	0.855	0.86
P62829	0.786	1.505	1.151	0.464	0.356	0.39	0.623	1.304	0.628	1.052	0.721	0.316	0.229	0.421	0.9	1.115	0.799	0.508	1.172	0.754	0.964	0.472	0.79	0.891	0.553	0.487	0.734	0.503	0.91	0.855	0.579	1.341	0.611	1.072	1.22	0.907	0.991	0.569	1.508	1.056	0.931	0.669	1.134	0.63	0.588	0.522	0.888	0.702	0.824
O95299	0.876	1.611	1.232	0.509	0.437	0.452	0.761	1.479	0.493	0.843	0.609	0.362	0.186	0.362	0.702	0.883	0.641	0.493	1.098	0.703	0.886	0.365	0.701	0.821	0.574	0.517	0.86	0.625	1.066	1.016	0.694	1.507	0.646	1.124	1.319	1	1.137	0.629	1.732	1.123	0.917	0.694	1.169	0.667	0.637	0.488	0.869	0.778	0.814
Q9UGI8	0.811	1.456	1.129	0.534	0.442	0.52	0.683	1.362	0.505	0.8	0.511	0.298	0.192	0.395	0.726	0.9	0.832	0.606	1.389	0.996	1.247	0.476	0.987	1.342	0.585	0.518	0.831	0.576	1.081	1.001	0.71	1.473	0.702	1.091	1.304	1.051	1.159	0.653	1.655	1.2	0.693	0.747	1.015	0.511	0.597	0.452	0.565	0.728	0.767
P30480	0.853	1.51	1.197	0.54	0.423	0.437	0.809	1.403	0.533	0.843	0.63	0.337	0.202	0.451	0.746	0.957	0.727	0.534	1.138	0.804	1.002	0.435	0.83	0.981	0.565	0.504	0.83	0.593	1.077	1.019	0.701	1.528	0.659	1.15	1.426	1.043	1.105	0.621	1.749	1.159	0.787	0.611	1.096	0.619	0.555	0.455	0.841	0.689	0.853
Q10713	0.883	1.633	1.207	0.503	0.396	0.37	0.697	1.374	0.559	0.955	0.696	0.345	0.202	0.447	0.9	1.065	0.861	0.558	1.346	0.98	1.079	0.574	1.014	0.904	0.586	0.519	0.853	0.609	1.04	1.004	0.715	1.481	0.665	1.116	1.363	1.057	1.06	0.633	1.616	1.16	0.928	0.647	1.103	0.664	0.568	0.502	0.858	0.749	0.854
Q9Y383	0.825	1.559	1.22	0.506	0.399	0.42	0.698	1.41	0.608	1.003	0.732	0.37	0.213	0.503	0.978	1.165	0.745	0.542	1.17	0.798	1.03	0.46	0.901	0.998	0.611	0.538	0.843	0.621	1.099	1.037	0.72	1.663	0.669	1.165	1.53	1.165	1.203	0.679	1.786	1.322	0.918	0.756	1.187	0.712	0.64	0.553	0.932	0.78	0.845
Q96I99	0.902	1.764	1.311	0.576	0.47	0.523	0.752	1.588	0.559	0.986	0.668	0.313	0.172	0.395	0.783	1.079	0.901	0.625	1.353	0.967	1.21	0.61	1.078	1.154	0.567	0.498	0.786	0.584	0.978	1.014	0.641	1.431	0.658	1.027	1.361	1.066	1.111	0.605	1.572	1.192	0.937	0.686	1.053	0.615	0.621	0.553	0.88	0.79	0.841
Q9BUQ8	0.865	1.695	1.308	0.55	0.46	0.531	0.705	1.566	0.548	0.894	0.637	0.348	0.212	0.458	0.813	1.019	0.793	0.523	1.24	0.841	1.071	0.503	0.888	1.046	0.552	0.542	0.794	0.582	0.987	0.96	0.668	1.506	0.667	1.041	1.253	0.966	1.044	0.646	1.44	1.171	0.921	0.804	1.121	0.74	0.69	0.586	0.924	0.806	0.875
E9PK91	0.848	1.684	1.291	0.554	0.442	0.496	0.774	1.591	0.609	1.126	0.803	0.375	0.238	0.542	0.942	1.252	0.788	0.584	1.339	0.878	1.089	0.533	0.949	1.091	0.56	0.496	0.825	0.575	0.991	0.953	0.651	1.464	0.674	1.206	1.459	1.145	1.232	0.639	1.866	1.301	0.916	0.685	1.073	0.642	0.573	0.544	0.869	0.68	0.905
Q99459	0.84	1.617	1.265	0.557	0.411	0.481	0.703	1.546	0.516	0.856	0.624	0.319	0.205	0.397	0.715	1.024	0.76	0.572	1.23	0.875	1.03	0.581	0.962	1.148	0.56	0.466	0.811	0.565	1.119	1.118	0.679	1.577	0.768	1.159	1.413	1.138	1.128	0.693	1.753	1.18	0.913	0.636	1.151	0.643	0.57	0.555	0.775	0.703	0.839
P61006	0.82	1.515	1.228	0.547	0.441	0.5	0.721	1.412	0.39	0.685	0.475	0.297	0.183	0.326	0.612	0.747	0.728	0.524	1.172	0.721	0.942	0.439	0.765	0.762	0.566	0.503	0.766	0.546	0.936	0.961	0.607	1.366	0.605	1.013	1.265	0.931	0.965	0.596	1.492	1.028	0.879	0.68	1.092	0.628	0.567	0.492	0.767	0.643	0.922
Q7Z5R6	0.834	1.578	1.217	0.503	0.354	0.41	0.73	1.409	0.61	1.061	0.742	0.337	0.214	0.511	0.864	1.159	0.816	0.578	1.299	0.898	1.132	0.539	0.957	1.117	0.564	0.493	0.78	0.567	0.969	0.957	0.615	1.45	0.631	1.086	1.281	0.969	1.08	0.639	1.607	1.099	0.905	0.68	1.112	0.683	0.62	0.521	0.899	0.753	0.812
P62979	0.828	1.801	1.47	0.504	0.383	0.443	0.795	1.62	0.505	0.938	0.666	0.318	0.176	0.481	0.853	0.92	0.663	0.473	1.242	0.73	0.93	0.402	0.812	0.977	0.555	0.476	0.766	0.54	1.001	1.072	0.645	1.517	0.637	1.116	1.486	1.03	1.095	0.662	1.713	1.227	0.948	0.669	1.128	0.648	0.598	0.555	0.856	0.71	0.953
A0A087WY55	0.898	1.747	1.366	0.508	0.441	0.476	0.832	1.648	0.585	1.014	0.694	0.324	0.219	0.583	0.968	1.109	0.801	0.526	1.276	0.855	1.085	0.468	0.854	1.076	0.559	0.502	0.818	0.586	1.022	0.986	0.647	1.561	0.633	1.099	1.469	1.032	1.017	0.561	1.559	1.238	0.883	0.659	1.163	0.661	0.64	0.564	0.911	0.74	0.919
P30487	0.902	1.834	1.458	0.525	0.482	0.464	0.891	1.785	0.91	1.823	1.109	0.324	0.248	1.05	1.886	1.945	0.7	0.532	1.242	0.841	1.172	0.43	0.867	1.176	0.599	0.533	0.937	0.68	1.25	1.143	0.884	1.649	0.62	1.121	1.592	1.13	1.217	0.598	1.923	1.403	1.015	0.73	1.301	0.767	0.842	0.659	1.04	0.919	0.842
P15586	0.889	1.717	1.342	0.542	0.424	0.444	0.834	1.661	0.68	1.192	0.864	0.353	0.261	0.6	1.099	1.357	0.894	0.613	1.373	1.014	1.241	0.609	1.098	1.3	0.557	0.478	0.852	0.561	0.966	0.94	0.675	1.54	0.648	1.09	1.364	1.056	1.139	0.609	1.531	1.246	0.905	0.628	1.112	0.602	0.621	0.541	0.868	0.759	0.927
Q08752	0.841	1.591	1.265	0.513	0.344	0.401	0.679	1.435	0.61	1.083	0.79	0.357	0.23	0.411	0.878	1.155	0.93	0.629	1.313	0.934	1.168	0.572	0.989	1.11	0.553	0.496	0.742	0.53	0.898	0.834	0.603	1.366	0.6	1.034	1.285	0.997	1.004	0.584	1.5	1.134	0.92	0.674	1.1	0.58	0.575	0.483	0.785	0.683	0.808
F8VQE1	0.852	1.521	1.2	0.482	0.375	0.388	0.698	1.477	0.576	0.897	0.678	0.311	0.19	0.42	0.881	1.128	0.723	0.55	1.267	0.772	1.047	0.445	0.921	1.159	0.525	0.459	0.699	0.56	1.02	0.929	0.644	1.431	0.6	1.025	1.327	1.002	1.108	0.597	1.745	1.158	0.892	0.658	1.126	0.631	0.567	0.496	0.896	0.721	0.79
E9PFP8	0.942	1.968	1.472	0.536	0.457	0.454	0.814	1.691	0.601	1.072	0.748	0.299	0.204	0.471	1.054	1.085	0.76	0.525	1.257	0.833	1.084	0.493	0.926	1.157	0.558	0.532	0.804	0.549	1.008	0.956	0.661	1.562	0.638	1.174	1.376	1.153	1.052	0.652	1.467	1.298	0.884	0.635	1.08	0.622	0.557	0.473	0.805	0.684	0.902
P46939	0.804	1.631	1.26	0.581	0.379	0.429	0.784	1.611	0.522	0.835	0.639	0.351	0.221	0.441	0.711	1.087	0.903	0.615	1.253	0.821	1.101	0.563	0.966	1.093	0.645	0.541	0.99	0.626	1.232	0.942	0.67	1.316	0.67	1.278	1.703	1.309	1.203	0.688	1.499	1.221	1.06	0.806	1.195	0.637	0.688	0.559	0.909	0.753	0.919
O43765	0.873	1.623	1.259	0.515	0.418	0.469	0.846	1.508	0.574	0.99	0.714	0.362	0.218	0.471	0.873	1.11	0.809	0.57	1.275	0.913	1.123	0.526	0.925	1.11	0.543	0.497	0.779	0.593	1.004	0.96	0.616	1.453	0.652	1.112	1.363	1.052	1.091	0.643	1.732	1.186	0.918	0.664	1.132	0.617	0.585	0.519	0.855	0.717	0.932
O95394	0.87	1.533	1.253	0.564	0.471	0.492	0.794	1.448	0.487	0.839	0.596	0.349	0.197	0.436	0.762	0.919	0.786	0.556	1.229	0.884	1.065	0.476	0.967	1.113	0.596	0.507	0.786	0.59	1.117	1.1	0.729	1.616	0.711	1.181	1.43	1.024	1.177	0.686	1.773	1.246	0.926	0.706	1.176	0.714	0.622	0.539	0.929	0.805	0.929
E7EM64	0.954	1.689	1.315	0.527	0.439	0.44	0.779	1.494	0.675	1.073	0.741	0.371	0.242	0.544	0.922	1.175	0.745	0.546	1.188	0.805	1.035	0.488	0.907	0.94	0.586	0.535	0.74	0.558	1.01	0.887	0.682	1.443	0.651	1.108	1.383	1.042	1.136	0.664	1.702	1.121	0.877	0.689	1.063	0.636	0.589	0.506	0.872	0.733	0.872
Q15717	0.834	1.613	1.181	0.478	0.366	0.391	0.686	1.442	0.58	0.975	0.665	0.315	0.206	0.449	0.841	1.101	0.777	0.535	1.137	0.753	1.018	0.485	0.877	0.981	0.556	0.509	0.763	0.532	0.966	0.96	0.632	1.401	0.652	1.078	1.269	0.987	1.056	0.652	1.551	1.065	0.941	0.676	1.049	0.624	0.563	0.497	0.857	0.714	0.854
Q96CM8	0.86	1.642	1.244	0.503	0.452	0.445	0.837	1.519	0.483	0.851	0.546	0.328	0.205	0.38	0.774	0.88	0.728	0.545	1.121	0.75	0.949	0.418	0.814	0.97	0.596	0.513	0.788	0.554	1.081	1.011	0.691	1.505	0.662	1.097	1.379	1.132	1.113	0.608	1.783	1.109	0.932	0.701	1.131	0.649	0.606	0.489	0.914	0.739	0.881
Q16576	0.773	1.517	1.054	0.5	0.423	0.442	0.654	1.257	0.324	0.527	0.38	0.283	0.184	0.297	0.494	0.633	0.746	0.576	1.354	0.833	0.967	0.401	0.891	1.025	0.6	0.446	0.692	0.601	1.054	1.069	0.655	1.482	0.601	1.178	1.455	1.078	1.198	0.618	2.047	1.204	0.911	0.691	1.093	0.633	0.57	0.457	0.776	0.692	0.897
P12931	0.838	1.712	1.3	0.555	0.422	0.449	0.879	1.751	0.607	1.044	0.717	0.343	0.208	0.472	0.942	1.119	0.795	0.546	1.199	0.843	0.999	0.518	0.914	0.954	0.55	0.483	0.746	0.513	0.892	0.88	0.61	1.369	0.642	1.111	1.279	1.03	1.064	0.647	1.629	1.078	0.903	0.678	1.12	0.658	0.558	0.506	0.837	0.736	0.84
Q05086	0.784	1.521	1.118	0.466	0.379	0.45	0.713	1.362	0.69	1.162	0.853	0.361	0.235	0.578	1.169	1.317	0.755	0.536	1.154	0.823	1.14	0.504	0.94	1.242	0.52	0.499	0.774	0.547	1.059	0.927	0.713	1.532	0.663	1.098	1.334	1.006	1.135	0.712	1.589	1.202	0.88	0.694	1.129	0.723	0.612	0.5	1.054	0.762	0.78
P62750	0.86	1.694	1.308	0.51	0.381	0.391	0.707	1.446	0.613	1.082	0.721	0.343	0.214	0.46	0.886	1.148	0.926	0.604	1.29	0.915	1.115	0.56	0.995	1.036	0.548	0.494	0.757	0.545	0.955	0.934	0.604	1.463	0.666	1.108	1.28	1.009	1.055	0.644	1.494	1.057	0.953	0.65	1.096	0.606	0.554	0.506	0.804	0.642	0.799
Q7Z406																	1.058	0.74	1.51	1.202	1.237	0.708	1.121	1.436	0.674	0.657	0.943	0.699	1.176	1.074	0.777	1.576	0.661	1.142	1.368	1.093	0.936	0.689	1.329	1.131	0.914	0.648	0.957	0.707	0.669	0.615	1.054	0.812
Q9NZT2	0.833	1.565	1.188	0.564	0.449	0.5	0.808	1.605	0.455	0.704	0.52	0.327	0.185	0.382	0.662	0.818	0.718	0.542	1.129	0.776	0.96	0.416	0.855	0.949	0.575	0.504	0.821	0.603	1.14	1.118	0.777	1.583	0.651	1.203	1.464	1.1	1.245	0.651	1.92	1.246	0.89	0.667	1.186	0.682	0.628	0.53	0.92	0.728	0.876
P60981	0.775	1.529	1.209	0.523	0.383	0.437	0.777	1.422	0.616	1.105	0.723	0.36	0.208	0.446	0.845	1.165	0.696	0.497	1.161	0.74	0.909	0.424	0.746	1.013	0.56	0.521	0.804	0.548	0.972	0.911	0.623	1.518	0.689	1.118	1.314	1.038	1.015	0.62	1.625	1.075	0.876	0.681	1.036	0.605	0.531	0.452	0.79	0.671	0.759
Q15154	0.86	1.485	1.131	0.552	0.469	0.485	0.774	1.396	0.417	0.545	0.468	0.308	0.185	0.353	0.528	0.664	0.831	0.587	1.277	0.892	1.153	0.575	0.978	1.038	0.693	0.59	0.976	0.691	1.195	1.182	0.8	1.679	0.672	1.041	1.478	1.045	1.172	0.605	1.626	1.164	0.878	0.724	1.12	0.689	0.601	0.517	0.937	0.739	0.808
Q8IY67	0.866	1.705	1.343	0.526	0.427	0.446	0.764	1.61	0.652	1.156	0.833	0.367	0.216	0.564	1.048	1.335	0.835	0.615	1.317	0.984	1.29	0.583	1.091	1.304	0.612	0.545	0.864	0.6	1.06	1.011	0.736	1.555	0.624	1.093	1.44	1.112	1.196	0.637	1.694	1.254	0.865	0.639	1.18	0.681	0.634	0.566	1.014	0.788	0.85
P06702	0.694	1.83	0.866	0.316	0.253	0.291	0.655	1.115	0.495	1.057	0.776	0.308	0.187	0.749	0.733	0.825	0.538	0.449	1.108	0.665	1.028	0.341	0.82	0.877	0.536	0.444	0.521	0.447	1.027	1.029	0.474	0.89	0.662	0.807	1.416	0.848	0.773	0.557	1.343	1.158	1.002	0.71	1.056	0.644	0.675	0.599	0.742	0.68	0.918
Q14739	0.79	1.565	1.206	0.516	0.391	0.429	0.688	1.41	0.525	0.847	0.627	0.327	0.204	0.435	0.788	0.961	0.765	0.537	1.214	0.803	0.985	0.45	0.865	0.979	0.562	0.495	0.764	0.584	0.999	0.948	0.652	1.387	0.608	1.075	1.297	0.984	1.078	0.598	1.64	1.119	0.881	0.682	1.144	0.662	0.598	0.488	0.901	0.704	0.799
Q32P28	0.82	1.535	1.19	0.539	0.366	0.399	0.703	1.386	0.514	0.756	0.568	0.329	0.191	0.465	0.743	0.88	0.81	0.553	1.213	0.873	1.049	0.543	0.969	0.978	0.585	0.505	0.833	0.628	1.072	1.078	0.73	1.555	0.599	1.078	1.34	1.063	1.051	0.651	1.568	1.063	0.885	0.67	1.069	0.692	0.605	0.519	0.847	0.748	0.815
P36957	0.865	1.64	1.294	0.52	0.399	0.431	0.747	1.498	0.581	0.988	0.723	0.339	0.214	0.494	0.904	1.131	0.825	0.543	1.176	0.826	1.029	0.503	0.885	0.952	0.542	0.478	0.773	0.554	0.975	0.937	0.63	1.455	0.647	1.131	1.347	1.047	1.106	0.625	1.653	1.189	0.945	0.683	1.11	0.609	0.565	0.499	0.837	0.704	0.877
P15153	0.844	1.669	1.293	0.496	0.388	0.411	0.748	1.513	0.591	1.05	0.716	0.327	0.205	0.482	0.947	1.118	0.762	0.53	1.238	0.802	1.024	0.474	0.898	0.992	0.558	0.498	0.799	0.583	1.045	0.987	0.667	1.471	0.626	1.077	1.396	1.032	1.075	0.619	1.615	1.153	0.88	0.643	1.127	0.655	0.585	0.5	0.849	0.709	0.851
O95571	0.836	1.597	1.233	0.478	0.38	0.417	0.747	1.47	0.503	0.789	0.602	0.331	0.212	0.382	0.709	0.916	0.832	0.593	1.201	0.846	1.05	0.503	0.943	1.014	0.598	0.541	0.827	0.654	1.108	1.066	0.721	1.596	0.63	1.073	1.316	0.998	1.159	0.618	1.777	1.157	0.94	0.69	1.166	0.705	0.675	0.547	0.964	0.819	0.869
Q16401	0.911	1.877	1.388	0.607	0.427	0.434	0.787	1.697	0.73	1.355	1.005	0.423	0.247	0.602	1.167	1.503	0.955	0.627	1.367	1.019	1.214	0.662	1.083	1.166	0.572	0.496	0.771	0.556	0.964	0.952	0.628	1.449	0.661	1.12	1.293	1.024	1.094	0.657	1.56	1.157	1.017	0.708	1.125	0.725	0.668	0.621	0.937	0.814	0.806
P0CG39									0.532	0.7	0.723	0.372	0.191	0.277	0.578	0.818	0.713	0.637	1.452	0.707	0.926	0.459	0.811	0.822	0.635	0.729	0.791	0.548	1.092	1.104	0.807	1.394									0.826	0.727	1.046	0.787	0.648	0.537	0.782	0.857
Q9NQG5	0.854	1.574	1.238	0.507	0.401	0.425	0.756	1.418	0.587	0.96	0.713	0.359	0.203	0.499	0.949	1.124	0.698	0.477	1.084	0.78	0.869	0.414	0.719	0.929	0.554	0.453	0.807	0.561	0.986	0.972	0.656	1.459	0.601	1.018	1.309	0.948	0.978	0.541	1.453	1.1	0.922	0.639	1.134	0.602	0.548	0.476	0.773	0.722	0.816
O75368	0.735	1.732	1.115	0.355	0.293	0.375	0.575	1.323	0.403	0.866	0.552	0.287	0.168	0.409	0.652	0.854	0.592	0.464	1.14	0.669	0.945	0.38	0.816	0.857	0.505	0.468	0.651	0.518	1.024	0.98	0.612	1.424	0.58	0.835	1.35	0.896	0.865	0.559	1.467	1.121	0.905	0.687	1.113	0.656	0.579	0.45	0.753	0.625	0.79
A0A024R4M0	0.812	1.475	1.168	0.485	0.345	0.363	0.683	1.293	0.66	1.168	0.828	0.35	0.227	0.515	0.965	1.274	0.705	0.451	1.025	0.679	0.855	0.394	0.696	0.763	0.552	0.499	0.735	0.509	0.912	0.881	0.609	1.407	0.635	1.119	1.307	1.011	1.035	0.627	1.568	1.084	0.931	0.688	1.133	0.653	0.582	0.522	0.894	0.717	0.807
Q13557	0.849	1.637	1.212	0.493	0.37	0.39	0.698	1.451	0.688	1.149	0.806	0.371	0.242	0.475	0.923	1.312	0.807	0.592	1.179	0.867	1.018	0.503	0.845	0.965	0.553	0.523	0.767	0.55	0.947	0.867	0.574	1.42	0.66	1.046	1.259	0.96	1.076	0.634	1.544	1.127	0.922	0.702	1.1	0.705	0.674	0.568	1.002	0.792	0.807
O75436	0.906	1.755	1.367	0.554	0.432	0.422	0.918	1.699	0.67	1.236	0.825	0.381	0.269	0.6	1.59	1.759	0.863	0.612	1.297	0.907	1.147	0.585	1.627	1.926	0.605	0.539	0.847	0.62	1.107	1.101	0.787	1.774	0.64	1.124	1.392	1.102	1.146	0.654	2.262	1.755	0.909	0.744	1.116	0.694	0.63	0.571	1.306	1.207	0.878
Q7L0Y3	0.842	1.694	1.328	0.519	0.375	0.566	0.792	1.642	0.643	1.025	0.748	0.371	0.246	0.481	0.943	1.22	0.782	0.572	1.168	0.806	1.028	0.518	0.881	0.88	0.579	0.546	0.799	0.597	1.006	0.969	0.639	1.529	0.829	1.146	1.303	1.08	1.227	0.698	1.579	1.299	0.889	0.694	1.115	0.633	0.601	0.529	0.853	0.749	0.752
J3KR97	0.884	1.871	1.397	0.52	0.421	0.445	0.774	1.734	0.759	1.363	0.998	0.405	0.286	0.523	1.278	1.552	0.739	0.46	1.132	0.791	0.857	0.481	0.774	0.771	0.591	0.546	0.913	0.541	0.948	0.929	0.646	1.563	0.61	1.081	1.24	1.001	0.893	0.616	1.13	1.231	0.997	0.734	1.154	0.655	0.645	0.625	1	0.79	0.785
Q5JWF2	0.813	1.39	1.187	0.521	0.411	0.368	0.815	1.336	0.478	0.801	0.573	0.358	0.22	0.39	0.7	0.877	0.866	0.598	1.284	0.926	1.098	0.599	0.979	1.096	0.578	0.547	0.735	0.53	0.867	0.812	0.608	1.387	0.598	0.93	1.142	0.947	0.865	0.543	1.135	1.002	0.92	0.709	1.187	0.648	0.589	0.517	0.844	0.802	0.841
E9PFH4	0.94	1.81	1.374	0.501	0.356	0.331	0.761	1.513	0.575	1.023	0.711	0.328	0.2	0.475	0.831	1.113	0.876	0.611	1.25	0.979	1.065	0.588	1.408	0.964	0.576	0.528	0.794	0.589	0.935	0.925	0.643	1.417	0.636	1.015	1.248	0.974	1.028	0.62	1.415	1.111	0.9	0.671	1.112	0.733	0.622	0.522	0.893	0.753	0.842
Q9UIJ7	0.866	1.759	1.271	0.532	0.447	0.349	0.831	1.521	0.649	1.137	0.776	0.372	0.244	0.554	0.899	1.08	0.784	0.575	1.255	0.921	1.093	0.522	0.969	1.044	0.627	0.544	0.715	0.614	1.07	1.01	0.649	1.383	0.658	1.094	1.371	1.101	1.041	0.657	1.595	1.17	0.95	0.74	1.108	0.669	0.646	0.523	0.885	0.827	0.87
Q9UI26	0.943	1.972	1.471	0.512	0.469	0.476	0.804	1.837	0.658	1.146	0.827	0.448	0.268	0.48	0.97	1.252	0.795	0.545	1.324	0.868	1.049	0.48	0.867	1.036	0.572	0.49	0.771	0.607	0.891	0.912	0.614	1.487	0.621	1.082	1.371	0.992	1.149	0.691	1.411	1.203	0.882	0.611	0.973	0.585	0.615	0.503	0.712	0.743	0.912
Q9NRV9	0.892	1.668	1.304	0.548	0.406	0.441	0.853	1.544	0.516	0.793	0.573	0.305	0.174	0.437	0.733	0.912	0.737	0.552	1.205	0.822	1.061	0.455	0.904	1.067	0.568	0.505	0.799	0.592	1.135	1.04	0.715	1.629	0.616	1.154	1.405	1.084	1.185	0.553	1.759	1.161	0.86	0.63	1.138	0.631	0.621	0.534	0.826	0.704	0.929
P54725	0.852	1.562	1.222	0.51	0.424	0.53	0.777	1.498	0.498	0.806	0.554	0.356	0.198	0.443	0.727	0.884	0.668	0.476	1.086	0.724	0.921	0.352	0.74	0.919	0.505	0.411	0.756	0.482	0.85	0.796	0.527	1.415	0.584	1.076	1.249	0.875	0.981	0.522	1.574	1.143	0.91	0.644	1.093	0.58	0.569	0.511	0.855	0.685	0.845
P42345	0.788	1.615	1.33	0.468	0.367	0.4	0.703	1.47	0.693	1.135	0.88	0.394	0.276	0.573	1.008	1.41	1.088	0.666	1.47	0.969	1.211	0.748	1.053	1.145	0.586	0.474	0.841	0.698	1	1.07	0.69	1.616	0.592	1.063	1.191	0.974	0.868	0.603	1.463	1.094	0.943	0.691	1.139	0.684	0.619	0.59	0.901	0.831	0.894
Q9NTJ3	0.857	1.68	1.272	0.522	0.442	0.482	0.743	1.525	0.502	0.892	0.617	0.343	0.195	0.438	0.802	1.02	0.945	0.647	1.48	1.04	1.298	0.687	1.156	1.443	0.56	0.538	0.803	0.567	1.069	1.004	0.674	1.48	0.652	1.154	1.432	1.087	1.296	0.792	1.641	1.348	0.838	0.712	1.035	0.633	0.617	0.485	0.782	0.667	0.813
P21912	0.839	1.801	1.203	0.494	0.364	0.401	0.751	1.486	0.474	0.861	0.584	0.342	0.187	0.46	0.753	0.821	0.66	0.519	1.153	0.811	1.003	0.409	0.891	0.955	0.571	0.513	0.71	0.605	1.088	1.034	0.664	1.472	0.676	1.013	1.462	1.073	1.085	0.598	1.659	1.16	0.907	0.644	1.171	0.632	0.624	0.516	0.85	0.707	0.927
Q9Y224	0.875	1.942	1.206	0.435	0.365	0.366	0.726	1.646	0.666	1.359	0.946	0.354	0.231	0.621	0.99	1.345	0.845	0.661	1.374	1.023	1.359	0.706	1.139	1.223	0.529	0.471	0.61	0.536	0.896	0.893	0.585	1.242	0.545	0.811	1.292	0.922	0.795	0.748	1.262	1.129	0.937	0.69	1.176	0.723	0.645	0.617	0.874	0.719	0.86
P30479
Q9H6T3	0.861	1.615	1.269	0.491	0.394	0.391	0.787	1.473	0.655	1.162	0.808	0.34	0.247	0.529	0.972	1.25	0.846	0.614	1.257	0.889	1.155	0.536	0.912	1.109	0.616	0.519	0.798	0.559	0.935	0.973	0.641	1.499	0.616	1.174	1.193	1.047	1.127	0.728	1.36	1.122	0.836	0.642	1.097	0.628	0.589	0.538	0.859	0.791	0.817
P01111	0.843	1.625	1.291	0.503	0.415	0.42	0.71	1.531	0.642	1.082	0.814	0.37	0.243	0.527	1.052	1.305	1.162	0.815	1.758	1.345	1.5	0.827	1.433	1.487	0.561	0.497	0.795	0.563	0.958	0.978	0.627	1.517	0.698	1.128	1.394	1.051	1.148	0.696	1.549	1.208	0.969	0.72	1.191	0.713	0.685	0.561	0.971	0.782	0.795
Q14318	0.85	1.57	1.224	0.512	0.396	0.406	0.667	1.421	0.55	0.921	0.609	0.319	0.201	0.409	0.76	0.954	0.988	0.694	1.465	1.116	1.322	0.663	1.204	1.233	0.582	0.524	0.807	0.62	1.117	1.021	0.709	1.488	0.617	1.045	1.354	1.039	1.137	0.694	1.643	1.116	0.817	0.705	1.2	0.714	0.702	0.557	1.005	0.818	0.8
Q6L8Q7	0.846	1.706	1.301	0.55	0.39	0.407	0.746	1.499	0.666	1.116	0.854	0.358	0.24	0.511	1.062	1.324	0.806	0.601	1.203	0.868	1.033	0.518	0.969	0.989	0.57	0.509	0.857	0.637	1.081	1.063	0.682	1.568	0.696	1.181	1.355	1.123	1.157	0.701	1.756	1.259	0.892	0.672	1.149	0.659	0.623	0.598	0.957	0.824	0.837
O14579	0.908	2.005	1.67	0.51	0.407	0.351	0.93	1.85	0.705	1.311	0.878	0.363	0.209	0.605	1.18	1.403	0.766	0.558	1.259	0.851	1.064	0.485	0.887	1.073	0.575	0.507	0.816	0.582	1.023	0.936	0.639	1.496	0.649	1.168	1.395	1.112	1.086	0.673	1.635	1.21	0.885	0.661	1.13	0.671	0.593	0.538	0.933	0.767	0.858
Q9NR45	0.838	1.644	1.307	0.507	0.414	0.44	0.764	1.499	0.489	0.85	0.579	0.351	0.189	0.413	0.752	0.912	0.723	0.521	1.164	0.814	0.972	0.451	0.783	0.913	0.531	0.469	0.766	0.525	0.885	0.863	0.603	1.394	0.632	1.08	1.308	0.972	1.01	0.575	1.518	1.106	0.858	0.669	1.027	0.598	0.559	0.456	0.795	0.68	0.813
Q3ZCQ8	0.852	1.639	1.276	0.533	0.42	0.44	0.731	1.471	0.672	1.074	0.784	0.373	0.247	0.53	0.982	1.279	0.675	0.481	1.042	0.742	0.906	0.429	0.745	0.783	0.579	0.55	0.837	0.627	1.051	0.996	0.674	1.585	0.617	1.131	1.396	1.005	1.154	0.671	1.759	1.186	0.933	0.698	1.119	0.695	0.681	0.583	1.008	0.825	0.873
P08237	0.896	1.846	1.37	0.52	0.435	0.474	0.78	1.631	0.674	1.14	0.775	0.362	0.247	0.424	0.911	1.294									0.661	0.412	1.005	0.666	1.027	0.811	0.661	1.454	0.556	0.791	1.241	0.791	0.878	0.48	1.157	1.174	0.956	0.775	1.115	0.725	0.693	0.635	1.024	0.754	0.798
P51114	0.84	1.458	1.145	0.569	0.472	0.482	0.74	1.418	0.488	0.802	0.557	0.326	0.193	0.431	0.739	0.911	0.856	0.732	1.486	0.915	1.251	0.608	1.075	1.221	0.617	0.568	0.835	0.662	1.2	1.122	0.877	1.493	0.583	1.178	1.3	0.966	1.074	0.624	1.621	1.044	0.939	0.735	1.173	0.775	0.717	0.631	1.072	0.792	0.854
O15294	0.845	1.587	1.17	0.552	0.437	0.478	0.684	1.467	0.493	0.83	0.582	0.357	0.219	0.431	0.726	0.961	0.905	0.64	1.372	0.97	1.196	0.612	1.055	1.069	0.551	0.586	0.771	0.573	1.128	1.026	0.729	1.515	0.661	1.084	1.27	1.043	1.072	0.627	1.512	1.179	0.921	0.678	1.126	0.696	0.608	0.556	0.951	0.8	0.83
P31942	0.78	1.584	1.209	0.534	0.401	0.434	0.709	1.451	0.548	0.936	0.654	0.312	0.209	0.502	0.789	1.031	0.748	0.543	1.18	0.737	1.021	0.458	0.867	0.902	0.592	0.518	0.828	0.567	0.976	0.958	0.67	1.481	0.63	1.13	1.367	1.09	1.125	0.693	1.628	1.074	0.936	0.718	1.125	0.704	0.6	0.568	0.943	0.759	0.844
Q9NP72	0.894	1.698	1.269	0.539	0.398	0.442	0.736	1.53	0.558	0.96	0.69	0.329	0.185	0.445	0.84	1.073	0.869	0.616	1.366	0.992	1.21	0.576	1.072	1.175	0.578	0.498	0.823	0.542	0.901	0.869	0.591	1.518	0.618	1.111	1.345	1.085	1.08	0.668	1.6	1.19	0.898	0.668	1.107	0.652	0.623	0.516	0.882	0.758	0.818
E7EW49	0.846	1.607	1.18	0.56	0.461	0.477	0.75	1.481	0.536	0.945	0.642	0.337	0.216	0.499	0.798	1.026	0.827	0.577	1.284	0.988	1.148	0.523	1.002	1.005	0.575	0.549	0.886	0.644	1.199	1.064	0.788	1.714	0.724	1.159	1.466	1.222	1.13	0.709	1.577	1.312	0.935	0.639	1.164	0.54	0.643	0.634	0.872	0.782	0.899
Q58FF6									0.537	0.868	0.611	0.287	0.244	0.542	0.709	1.203																	0.556	1.235	1.167	1.001	1.212	0.594	1.772	1.401
O95336	0.914	1.628	1.217	0.572	0.465	0.461	0.844	1.517	0.748	1.309	1.001	0.399	0.288	0.694	1.167	1.331	0.829	0.58	1.242	0.92	1.124	0.512	0.933	1.002	0.579	0.514	0.806	0.614	1.019	1.041	0.686	1.475	0.67	1.077	1.346	0.985	0.943	0.567	1.469	1.128	0.999	0.744	1.18	0.697	0.724	0.63	0.986	0.83	1.014
Q9UKY7	0.62	1.529	1.025	0.341	0.31	0.401	0.904	1.259	0.485	0.733	0.463	0.313	0.158	0.411	0.723	0.695	0.609	0.459	1.068	0.7	0.929	0.332	0.719	0.993	0.47	0.475	0.743	0.574	1.033	0.987	0.621	1.416	0.573	1.043	1.517	1.026	1.007	0.532	1.726	1.239	0.86	0.715	1.158	0.637	0.569	0.474	0.819	0.699	0.917
A0A087WUC6	0.835	1.588	1.235	0.503	0.378	0.387	0.725	1.44	0.601	1.022	0.727	0.357	0.224	0.44	0.853	1.135	0.783	0.554	1.247	0.843	1.019	0.499	0.875	1.011	0.536	0.493	0.805	0.584	0.943	0.945	0.631	1.464	0.629	1.091	1.325	0.969	1.033	0.608	1.59	1.124	0.911	0.694	1.099	0.646	0.595	0.507	0.886	0.768	0.806
Q13151	0.772	1.464	1.076	0.478	0.378	0.447	0.671	1.318	0.501	0.792	0.552	0.326	0.203	0.397	0.653	0.875	0.731	0.517	1.181	0.768	0.976	0.445	0.857	0.955	0.595	0.505	0.802	0.547	0.969	0.928	0.61	1.442	0.654	1.148	1.334	1.133	1.16	0.689	1.866	1.168	0.938	0.712	1.14	0.669	0.593	0.514	0.9	0.691	0.864
O00505	0.891	1.599	1.278	0.54	0.424	0.474	0.765	1.424	0.529	0.848	0.643	0.34	0.242	0.388	0.723	1.002	0.684	0.452	0.877	0.682	0.786	0.363	0.646	0.734	0.61	0.559	0.839	0.596	1.116	1.151	0.717	1.624	0.762	1.038	1.213	0.954	0.95	0.582	1.556	1.183	0.86	0.676	1.065	0.642	0.587	0.561	0.839	0.763	0.73
Q9UNP9	0.9	1.807	1.486	0.545	0.441	0.368	0.831	1.609	0.56	0.919	0.659	0.34	0.208	0.443	0.855	1.01	0.834	0.615	1.363	1.006	1.191	0.529	1.049	1.165	0.567	0.487	0.839	0.608	1.122	1.097	0.715	1.503	0.641	1.062	1.284	1.032	1.135	0.705	1.621	1.185	0.954	0.705	1.214	0.761	0.655	0.555	1.084	0.807	0.843
O95831	0.835	1.503	1.17	0.514	0.432	0.502	0.738	1.409	0.469	0.731	0.56	0.336	0.183	0.378	0.621	0.852	0.64	0.47	1.014	0.696	0.811	0.33	0.645	0.762	0.545	0.451	0.747	0.543	0.89	0.866	0.568	1.414	0.612	1.102	1.324	1	1.028	0.565	1.658	1.109	0.887	0.661	1.12	0.631	0.59	0.51	0.862	0.724	0.825
P53007	0.835	1.528	1.179	0.481	0.382	0.442	0.652	1.327	0.52	0.897	0.632	0.335	0.203	0.412	0.765	0.997	0.733	0.53	1.192	0.757	0.983	0.453	0.79	0.919	0.56	0.504	0.806	0.563	0.98	0.965	0.624	1.532	0.675	1.143	1.342	0.999	1.138	0.639	1.733	1.16	0.901	0.675	1.121	0.666	0.626	0.601	0.981	0.795	0.792
P54709	0.831	1.66	1.258	0.472	0.349	0.372	0.765	1.446	0.676	1.205	0.855	0.388	0.225	0.579	1.083	1.29	0.789	0.539	1.154	0.837	1.025	0.453	0.867	0.912	0.561	0.478	0.759	0.567	1.01	0.946	0.623	1.447	0.644	1.035	1.317	0.989	1.039	0.548	1.687	1.126	0.924	0.579	1.093	0.55	0.578	0.531	0.773	0.648	0.951
P59998	0.871	1.572	1.27	0.512	0.385	0.407	0.756	1.43	0.629	1.044	0.715	0.342	0.215	0.508	0.948	1.133	0.791	0.556	1.214	0.841	0.998	0.517	0.904	0.953	0.555	0.49	0.768	0.557	0.941	0.919	0.638	1.375	0.634	1.1	1.298	1.023	1.111	0.616	1.61	1.098	0.88	0.667	1.034	0.639	0.568	0.517	0.842	0.7	0.819
B1ALA9	0.837	1.577	1.196	0.537	0.423	0.427	0.696	1.462	0.566	0.929	0.676	0.361	0.234	0.47	0.848	1.088	0.874	0.613	1.336	0.959	1.129	0.582	1.014	1.09	0.592	0.512	0.764	0.57	1.01	0.99	0.659	1.445	0.666	1.163	1.37	1.105	1.115	0.706	1.695	1.176	0.895	0.649	1.06	0.656	0.546	0.505	0.815	0.708	0.798
Q8N3C0	0.872	1.738	1.32	0.564	0.508	0.569	0.826	1.711	1.208	2.197	1.481	0.433	0.372	0.842	1.834	2.487	0.95	0.616	1.343	1.011	1.207	0.74	1.105	1.149	0.614	0.513	0.78	0.611	1.096	1.109	0.76	1.54	0.651	1.081	1.285	1.048	1.025	0.717	1.527	1.195	0.914	0.72	1.233	0.791	0.75	0.703	1.129	0.892	0.881
Q9HCU5	0.894	1.5	1.156	0.551	0.47	0.461	0.709	1.42	0.581	0.955	0.715	0.322	0.213	0.478	0.895	1.151	1.086	0.689	1.369	1.153	1.149	0.765	1.487	1.07	0.54	0.547	0.771	0.576	1.087	1.001	0.759	1.504	0.67	1.15	1.312	1.057	1.195	0.713	1.842	1.221	0.927	0.696	1.097	0.675	0.663	0.583	0.993	0.8	0.825
Q99880	1.11	1.612	1.466	0.621	0.509	0.657	1.026	2.055	0.516	0.862	0.62	0.425	0.245	0.368	0.595	1.022									0.683	0.584	0.843	0.765	1.194	1.235	0.789	1.862																	0.937
P49720	0.823	1.564	1.233	0.53	0.388	0.417	0.718	1.393	0.696	1.156	0.797	0.331	0.234	0.462	0.947	1.232	0.806	0.541	1.231	0.852	1.042	0.497	0.855	0.907	0.568	0.538	0.781	0.548	1.027	0.986	0.685	1.419	0.638	1.06	1.283	0.994	0.974	0.625	1.404	1.103	0.876	0.697	1.1	0.71	0.629	0.517	0.921	0.794	0.827
Q9H3P7	0.845	1.605	1.25	0.603	0.499	0.516	0.77	1.487	0.533	0.911	0.668	0.342	0.205	0.457	0.879	1.086	0.806	0.607	1.322	0.868	1.128	0.528	0.992	1.165	0.568	0.506	0.782	0.624	1.098	1.054	0.717	1.553	0.662	1.184	1.483	1.129	1.177	0.673	1.776	1.204	0.907	0.677	1.129	0.673	0.599	0.538	0.909	0.721	0.857
Q7Z4V5	0.873	1.608	1.237	0.551	0.421	0.456	0.75	1.497	0.569	1.012	0.761	0.363	0.211	0.467	0.813	1.199	0.825	0.625	1.333	0.919	1.207	0.579	1.009	1.177	0.593	0.528	0.753	0.597	1.06	0.993	0.68	1.504	0.669	1.1	1.327	1.034	1.12	0.667	1.721	1.202	0.938	0.702	1.198	0.723	0.681	0.604	1	0.754	0.787
Q5ZPR3	0.853	1.415	1.062	0.515	0.449	0.486	0.727	1.418	0.424	0.684	0.515	0.342	0.186	0.379	0.601	0.809	0.744	0.541	1.218	0.795	1.044	0.504	0.864	0.973	0.592	0.502	0.828	0.662	1.154	1.153	0.722	1.584	0.665	1.15	1.446	1.107	1.207	0.628	1.871	1.239	0.903	0.639	1.177	0.655	0.606	0.555	0.888	0.705	0.897
Q5QNW6	1.08	2.134	2.267	0.653	0.526	0.681	1.107	2.207	0.693	1.394	1.03	0.419	0.291	0.747	1.904	1.632	0.895	0.598	1.927	1.225	1.217	0.563	1.298	1.346	0.683	0.574	0.874	0.755	1.401	1.42	0.867	1.88	0.502	1.055	1.539	1.205	1.22	0.805	1.847	1.155	1.016	0.678	1.272	0.753	0.778	0.644	1.081	0.768	0.91
Q92769	0.833	1.639	1.304	0.502	0.367	0.45	0.667	1.431	0.542	0.954	0.647	0.341	0.203	0.423	0.716	1.015	0.738	0.515	1.142	0.789	0.988	0.427	0.813	0.89	0.538	0.512	0.755	0.526	0.924	0.895	0.573	1.408	0.654	1.093	1.325	0.958	1.05	0.614	1.635	1.109	0.863	0.645	1.088	0.588	0.549	0.424	0.701	0.659	0.809
E9PC62	0.824	1.658	1.277	0.502	0.401	0.434	0.785	1.519	0.682	1.198	0.866	0.381	0.248	0.636	1.151	1.343	0.908	0.686	1.503	1.053	1.419	0.617	1.13	1.405	0.597	0.512	0.815	0.624	1.243	1.14	0.784	1.684	0.639	1.165	1.426	1.132	1.165	0.713	1.76	1.33	0.932	0.69	1.143	0.66	0.64	0.539	0.962	0.78	0.832
J3QQ67	0.889	1.775	1.414	0.556	0.398	0.46	0.714	1.581	0.546	1	0.766	0.344	0.194	0.426	0.784	1.16	0.705	0.473	1.053	0.687	0.862	0.366	0.689	0.832	0.559	0.505	0.756	0.525	0.954	0.892	0.603	1.452	0.648	1.116	1.381	1.002	1.035	0.593	1.619	1.116	0.904	0.674	1.077	0.597	0.54	0.463	0.794	0.693	0.81
Q8TDW0	0.827	1.643	1.208	0.507	0.378	0.353	0.697	1.406	0.615	1.031	0.725	0.392	0.244	0.469	0.928	1.147	0.939	0.634	1.379	1.004	1.297	0.68	1.069	1.143	0.582	0.557	0.798	0.599	1.079	0.987	0.704	1.572	0.671	1.179	1.439	1.097	1.218	0.68	1.625	1.218	0.961	0.701	1.12	0.692	0.662	0.54	0.869	0.812	0.783
P22307	0.752	1.737	1.117	0.413	0.297	0.325	0.589	1.175	0.494	0.988	0.731	0.284	0.157	0.435	0.64	0.87	0.607	0.468	1.277	0.667	0.961	0.378	0.842	0.928	0.523	0.479	0.601	0.437	0.883	0.886	0.489	1.096	0.55	0.778	1.289	0.74	0.819	0.589	1.272	1.01	0.934	0.691	1.01	0.638	0.571	0.475	0.745	0.604	0.652
P50452	0.953	1.949	1.513	0.607	0.419	0.468	0.936	1.842	0.897	1.577	1.089	0.364	0.238	0.754	1.454	1.778	0.989	0.688	1.557	1.025	1.386	0.596	1.262	1.423	0.579	0.508	0.796	0.557	1.033	0.985	0.7	1.466	0.638	1.144	1.341	1.056	1.143	0.663	1.578	1.265	0.882	0.671	1.15	0.676	0.627	0.595	1.026	0.821	0.825
P39019	0.784	1.625	1.067	0.473	0.351	0.377	0.612	1.254	0.603	1.028	0.689	0.378	0.22	0.46	0.704	0.953	0.569	0.446	0.928	0.663	0.807	0.361	0.636	0.758	0.536	0.5	0.651	0.497	0.842	0.79	0.492	1.134	0.657	0.92	1.227	0.869	0.821	0.52	1.337	0.959	0.891	0.677	1.05	0.567	0.555	0.495	0.799	0.616	0.873
Q15293	0.865	1.664	1.284	0.516	0.445	0.47	0.801	1.511	0.583	1.015	0.735	0.375	0.207	0.468	0.839	1.099	0.747	0.54	1.131	0.82	0.991	0.461	0.826	0.943	0.56	0.498	0.756	0.594	1.018	0.972	0.664	1.491	0.687	1.126	1.286	1.044	1.12	0.637	1.757	1.145	0.939	0.73	1.175	0.68	0.621	0.52	0.915	0.755	0.861
Q9NPH2	0.918	1.69	1.355	0.568	0.414	0.438	0.743	1.626	0.58	0.915	0.662	0.355	0.245	0.455	0.752	1.018	0.889	0.624	1.549	0.982	1.222	0.597	1.141	1.094	0.59	0.51	0.805	0.559	0.973	0.981	0.644	1.439	0.668	1.121	1.276	1.024	1.007	0.622	1.512	1.133	0.95	0.655	1.172	0.753	0.612	0.519	0.961	0.718	0.757
O95757	0.896	1.823	1.339	0.521	0.407	0.334	0.797	1.685	0.652	1.028	0.694	0.293	0.197	0.463	0.982	1.043	1.307	0.835	1.668	1.315	1.702	0.971	1.613	1.754	0.595	0.597	0.903	0.837	1.152	1.558	0.895	1.523	0.752	1.228	1.213	1.149	1.223	0.726	1.762	1.173	0.878	0.781	1.153	0.687	0.647	0.608	0.909	0.881	0.711
Q9Y6D6	0.875	1.639	1.275	0.493	0.335	0.342	0.715	1.435	0.915	1.664	1.156	0.383	0.309	0.742	1.436	1.827	1.087	0.697	1.743	1.132	1.568	1.037	1.396	1.741	0.625	0.556	0.801	0.659	1.106	1.067	0.716	1.502	0.73	1.138	1.324	1.122	1.1	0.948	1.419	1.966	0.88	0.655	0.99	0.653	0.591	0.604	0.824	0.736	0.962
P63208	0.855	1.637	1.261	0.523	0.43	0.437	0.893	1.505	0.593	1.038	0.742	0.391	0.209	0.454	0.823	1.138	0.714	0.518	1.22	0.816	0.983	0.416	0.802	1.027	0.52	0.439	0.746	0.537	0.999	0.943	0.593	1.468	0.649	1.043	1.315	0.947	0.952	0.55	1.541	1.125	0.869	0.649	1.216	0.648	0.587	0.51	0.819	0.762	0.869
A0A0G2JHC2	0.856	1.515	1.217	0.548	0.491	0.464	0.833	1.57	0.428	0.605	0.419	0.313	0.179	0.401	0.619	0.697	0.745	0.535	1.15	0.823	0.972	0.453	0.859	0.893	0.567	0.475	0.759	0.563	1.049	1.018	0.658	1.401	0.675	1.124	1.348	1.074	1.216	0.646	1.779	1.212	0.837	0.712	1.199	0.737	0.62	0.517	0.917	0.702	0.904
Q9UNH7	0.833	1.667	1.263	0.546	0.414	0.447	0.745	1.467	0.604	1.032	0.716	0.352	0.216	0.5	0.891	1.14	0.735	0.521	1.137	0.805	0.989	0.464	0.852	0.979	0.57	0.507	0.771	0.577	0.979	0.938	0.659	1.463	0.67	1.097	1.345	1.005	1.106	0.628	1.641	1.151	0.959	0.704	1.116	0.623	0.544	0.497	0.785	0.706	0.84
P45973	0.906	1.818	1.351	0.517	0.373	0.414	0.76	1.5	0.655	1.221	0.78	0.353	0.205	0.503	0.953	1.246	0.748	0.496	1.142	0.849	0.917	0.401	0.819	0.871	0.558	0.488	0.816	0.591	0.988	1.016	0.61	1.536	0.522	1.005	1.337	0.861	0.88	0.574	1.713	1.096	0.849	0.526	1.111	0.537	0.43	0.445	0.766	0.629	0.705
Q8N3U4	0.883	1.825	1.379	0.53	0.398	0.422	0.824	1.642	1.031	1.981	1.436	0.381	0.308	0.805	1.864	2.27	1.037	0.63	1.42	1.123	1.235	0.715	1.221	1.348	0.589	0.525	0.788	0.611	1.126	1.063	0.732	1.545	0.623	1.096	1.396	1.045	1.007	0.675	1.482	1.217	0.907	0.634	1.204	0.707	0.74	0.606	1.091	0.928	0.852
Q9H4A6	0.913	1.935	1.459	0.534	0.455	0.49	0.903	1.885	0.619	1.063	0.771	0.374	0.218	0.448	0.95	1.274	0.943	0.708	1.535	1.013	1.367	0.682	1.173	1.143	0.607	0.548	0.879	0.67	1.205	1.187	0.888	1.798	0.649	1.135	1.571	0.996	1.072	0.594	1.85	1.197	0.922	0.683	1.184	0.717	0.754	0.606	1.051	0.86	0.819
Q5JRX3	0.893	1.743	1.384	0.533	0.395	0.399	0.855	1.653	0.486	0.814	0.585	0.323	0.203	0.371	0.712	0.905	0.936	0.661	1.504	1.039	1.29	0.657	1.164	1.288	0.567	0.479	0.79	0.595	1.044	1.026	0.694	1.523	0.646	1.163	1.414	1.081	1.446	0.72	1.919	1.454	0.917	0.725	1.192	0.686	0.611	0.567	0.953	0.802	0.886
O75477	0.799	1.715	1.308	0.489	0.41	0.477	0.849	1.552	0.587	1.071	0.677	0.365	0.217	0.493	0.884	1.179	1.628	0.996	2.148	1.914	2.38	1.251	1.713	2.181	0.663	0.587	0.872	0.645	1.178	1.132	0.771	1.67	0.934	1.061	1.433	1.244	1.442	0.843	1.558	1.584	0.893	0.704	1.206	0.688	0.782	0.636	1.117	0.935	0.83
Q68EM7	0.864	1.683	1.297	0.504	0.407	0.412	0.748	1.531	0.565	1.037	0.727	0.377	0.203	0.51	0.952	1.145	0.846	0.565	1.234	0.974	1.168	0.595	0.884	1.054	0.554	0.494	0.826	0.599	1.028	1.019	0.653	1.494	0.624	1.04	1.408	1.076	1.098	0.63	1.754	1.259	0.857	0.652	1.085	0.624	0.576	0.499	0.852	0.714	0.924
P34910	0.851	1.528	1.248	0.53	0.404	0.436	0.719	1.491	0.528	0.917	0.68	0.329	0.2	0.411	0.761	1.017	0.789	0.577	1.255	0.845	1.039	0.487	0.811	0.99	0.491	0.433	0.769	0.523	0.774	0.799	0.542	1.292	0.637	1.045	1.279	0.973	0.974	0.547	1.408	1.117	0.922	0.663	1.164	0.613	0.588	0.483	0.777	0.7	0.847
Q14141	0.889	1.397	1.138	0.477	0.287	0.286	0.681	1.135	0.615	0.887	0.587	0.357	0.22	0.511	0.831	0.989									0.689	0.593	0.689	0.742	1.044	1.131	0.696	1.462	0.722	1.248	1.42	1.206	1.428	0.86	1.733	1.284	0.931	0.638	1.107	0.678	0.605	0.546	0.934	0.824	0.813
P50914	0.886	1.708	1.312	0.484	0.389	0.401	0.794	1.52	0.579	0.975	0.695	0.284	0.191	0.497	0.944	1.067	0.842	0.585	1.37	0.885	1.119	0.533	1.026	1.166	0.57	0.492	0.779	0.548	1.032	0.97	0.632	1.466	0.605	1.125	1.319	1.039	1.103	0.654	1.606	1.128	0.885	0.641	1.107	0.647	0.596	0.505	0.86	0.715	0.813
F5GYQ1	0.917	1.746	1.351	0.51	0.383	0.383	0.806	1.685	0.677	1.183	0.81	0.335	0.209	0.519	1.06	1.31	0.913	0.575	1.305	0.978	1.11	0.58	0.982	1.083	0.575	0.489	0.79	0.527	1.021	0.942	0.656	1.478	0.674	1.109	1.33	1.063	1.127	0.698	1.568	1.17	0.901	0.641	1.053	0.617	0.548	0.484	0.842	0.691	0.815
P55145	0.801	1.894	1.149	0.44	0.341	0.421	0.719	1.463	0.581	1.201	0.796	0.364	0.202	0.472	0.796	1.029	0.597	0.484	0.984	0.74	0.907	0.378	0.805	0.822	0.493	0.539	0.606	0.579	0.951	0.891	0.601	1.293	0.623	0.78	1.199	0.867	0.857	0.54	1.361	0.961	0.896	0.73	1.113	0.618	0.541	0.438	0.747	0.606	0.754
Q14677	0.841	1.574	1.154	0.539	0.458	0.517	0.771	1.513	0.535	0.897	0.626	0.351	0.208	0.457	0.823	1.009	0.677	0.502	1.051	0.731	0.916	0.408	0.801	0.874	0.568	0.486	0.801	0.592	1.098	1.029	0.677	1.527	0.638	1.147	1.371	1.101	1.156	0.645	1.728	1.191	0.891	0.666	1.153	0.646	0.593	0.521	0.858	0.705	0.844
O94905	0.991	1.831	1.539	0.505	0.331	0.404	0.745	1.665	0.617	0.961	0.671	0.365	0.204	0.411	0.833	1.059	0.984	0.601	1.429	1.051	1.277	0.689	1.151	1.328	0.569	0.486	0.781	0.592	0.989	0.979	0.706	1.49	0.681	1.064	1.286	0.959	1.084	0.634	1.399	1.206	0.899	0.664	1.07	0.695	0.639	0.591	0.899	0.822	0.792
P63279	0.897	1.782	1.421	0.526	0.405	0.42	0.837	1.742	0.628	1.167	0.872	0.37	0.212	0.583	1.04	1.24	0.785	0.519	1.232	0.891	1.089	0.472	0.866	1.117	0.519	0.474	0.797	0.562	0.932	0.905	0.591	1.475	0.665	1.101	1.406	1.007	0.937	0.475	1.541	1.181	0.939	0.609	1.163	0.574	0.625	0.551	0.834	0.718	0.989
P51531
M0QWZ7	0.875	1.574	1.211	0.532	0.485	0.538	0.729	1.52	0.488	0.808	0.574	0.305	0.2	0.378	0.71	0.941	0.749	0.562	1.231	0.888	1.067	0.547	0.934	0.995	0.613	0.496	0.802	0.559	1.078	1.046	0.729	1.473	0.639	1.107	1.275	1.012	1.114	0.635	1.601	1.096	0.928	0.718	1.156	0.69	0.68	0.558	0.961	0.764	0.843
P46734	0.818	1.611	1.227	0.483	0.396	0.402	0.727	1.445	0.805	1.454	1.001	0.413	0.291	0.625	1.301	1.62	0.872	0.614	1.502	1.07	1.266	0.715	1.142	1.226	0.474	0.498	0.775	0.635	1.071	1.03	0.69	1.369	0.625	1.026	1.376	1.028	1.003	0.671	1.48	1.156	0.865	0.701	1.124	0.68	0.591	0.531	0.916	0.768	0.744
P48426	0.876	1.652	1.297	0.501	0.397	0.448	0.75	1.547	0.595	0.976	0.677	0.342	0.219	0.525	0.876	1.063	0.718	0.486	1.05	0.749	0.867	0.417	0.776	0.853	0.574	0.513	0.787	0.578	1.001	0.976	0.663	1.52	0.639	1.1	1.307	1.055	1.161	0.655	1.716	1.188	0.915	0.678	1.119	0.648	0.606	0.52	0.873	0.732	0.849
O14786	0.836	1.753	1.382	0.642	0.544	0.504	0.81	1.615									0.891	0.529	1.362	0.992	1.384	0.73	1.159	1.126	0.616	0.529	0.941	0.617	0.909	1.004	0.689	1.59	0.67	1.227	1.532	1.088	1.209	0.721	1.737	1.2	0.909	0.679	1.228	0.726	0.59	0.522	0.914	0.708	0.941
P40855	1.009	1.928	1.436	0.632	0.56	0.563	0.793	1.937	0.542	0.903	0.7	0.39	0.238	0.403	0.732	0.985	0.762	0.557	1.126	0.808	0.897	0.444	0.782	0.871	0.584	0.51	0.708	0.523	0.851	0.767	0.528	1.257	0.699	1.072	1.338	0.993	1.075	0.606	1.758	1.207	0.896	0.702	1.179	0.684	0.569	0.517	0.882	0.675	0.992
Q6DD88	0.891	1.606	1.265	0.541	0.459	0.447	0.74	1.516	0.568	0.913	0.648	0.343	0.214	0.457	0.833	1.07	0.709	0.468	1.102	0.752	0.903	0.455	0.768	0.949	0.6	0.54	0.794	0.577	1.023	0.922	0.595	1.558	0.673	1.218	1.444	1.111	1.149	0.686	1.655	1.262	0.858	0.662	1.105	0.66	0.581	0.506	0.852	0.747	0.841
Q00796	0.873	1.826	1.473	0.601	0.412	0.476	0.783	1.669	0.653	1.117	0.797	0.368	0.253	0.546	1.012	1.282	0.903	0.637	1.364	0.997	1.194	0.652	1.044	1.092	0.563	0.499	0.734	0.538	0.936	0.936	0.607	1.4	0.636	1.099	1.273	1.02	1.112	0.677	1.649	1.099	0.867	0.612	1.089	0.593	0.538	0.451	0.706	0.696	0.849
K7EMQ3									0.94	1.647	1.284	0.489	0.336	0.529	1.575	1.821
P80303	0.937	1.846	1.407	0.572	0.432	0.483	0.817	1.635	0.563	0.975	0.689	0.372	0.218	0.423	0.933	1.097	0.88	0.602	1.243	0.941	1.147	0.529	0.941	1.192	0.562	0.512	0.79	0.597	1.033	0.964	0.658	1.492	0.651	1.152	1.298	1.017	1.089	0.622	1.696	1.194	0.941	0.661	1.18	0.649	0.619	0.575	0.901	0.806	0.928
H7BXH2	0.891	1.757	1.3	0.568	0.496	0.564	0.766	1.64	0.75	1.307	0.896	0.42	0.284	0.609	1.117	1.481	0.907	0.63	1.27	1.032	1.168	0.662	1.038	1.128	0.649	0.558	0.796	0.532	1.026	1.039	0.645	1.427	0.643	1.153	1.348	1.054	1.074	0.743	1.532	1.197	0.893	0.695	1.091	0.752	0.685	0.608	0.969	0.799	0.849
Q7KZ85	0.869	1.685	1.301	0.555	0.411	0.434	0.733	1.601	0.566	0.927	0.685	0.348	0.206	0.485	0.982	1.099	0.747	0.59	1.471	0.893	1.053	0.55	0.934	1.157	0.604	0.575	0.779	0.613	1.23	1.072	0.746	1.652	0.61	1.147	1.501	1.091	1.114	0.665	1.707	1.181	0.918	0.745	1.152	0.701	0.652	0.602	0.971	0.807	0.824
Q16836	0.803	1.583	1.237	0.482	0.356	0.447	0.744	1.455	0.559	0.944	0.691	0.348	0.198	0.46	0.864	1.055	0.779	0.517	1.194	0.84	1.031	0.45	0.867	1.033	0.542	0.495	0.789	0.555	0.943	0.902	0.612	1.445	0.676	1.115	1.372	1.071	1.119	0.628	1.666	1.21	0.902	0.629	1.136	0.586	0.613	0.559	0.928	0.739	0.855
A0A087X1H5	0.806	1.579	1.325	0.479	0.43	0.409	0.804	1.561	0.578	0.939	0.74	0.35	0.218	0.51	0.842	1.108	0.835	0.605	1.209	0.812	1.115	0.528	0.879	0.889	0.656	0.601	0.928	0.609	1.167	1.111	0.686	1.584	0.606	1.077	1.43	1.093	1.281	0.693	1.917	1.285	0.923	0.698	1.085	0.653	0.638	0.586	0.983	0.722	0.876
Q15637	0.915	1.723	1.285	0.551	0.401	0.447	0.818	1.527	0.493	0.775	0.526	0.318	0.186	0.427	0.693	0.766	0.804	0.645	1.425	0.96	1.229	0.532	1.07	1.15	0.573	0.528	0.767	0.588	1.101	1.077	0.701	1.394	0.685	1.016	1.406	1.05	1.153	0.674	1.749	1.106	0.969	0.774	1.116	0.696	0.637	0.528	0.884	0.71	0.908
P63000	0.865	1.649	1.356	0.476	0.397	0.356	0.776	1.426	0.692	1.235	0.846	0.338	0.225	0.489	1.019	1.327	0.966	0.714	1.542	0.982	1.256	0.59	1.139	1.205	0.567	0.534	0.753	0.533	0.98	0.875	0.615	1.518	0.602	1	1.255	0.953	1.029	0.623	1.565	1.051	0.934	0.683	1.098	0.632	0.603	0.588	0.92	0.712	0.718
P55957	0.904	1.547	1.069	0.492	0.417	0.456	0.826	1.314	0.747	1.265	0.938	0.384	0.27	0.628	1.156	1.295	0.761	0.575	1.173	0.903	1.077	0.502	0.946	0.986	0.594	0.503	0.764	0.595	1.153	1.17	0.684	1.421	0.606	1.058	1.42	1.062	1.02	0.531	1.558	1.26	0.948	0.658	1.162	0.678	0.658	0.582	0.844	0.699	0.982
P22059	0.824	1.733	1.337	0.484	0.42	0.403	0.768	1.565	0.611	1.159	0.788	0.393	0.246	0.523	1.004	1.277	0.816	0.59	1.467	0.902	1.232	0.563	1.029	1.302	0.542	0.497	0.773	0.53	0.983	0.914	0.622	1.541	0.581	1.102	1.382	1.035	1.124	0.612	1.637	1.276	0.886	0.674	1.163	0.692	0.634	0.532	0.921	0.826	0.837
Q8IV08	0.928	1.703	1.371	0.532	0.407	0.4	0.787	1.561	0.555	0.922	0.663	0.369	0.209	0.486	0.794	1.082	0.829	0.568	1.252	0.923	1.04	0.545	0.938	1.167	0.552	0.495	0.808	0.571	0.999	0.974	0.659	1.513	0.679	1.122	1.277	1.018	1.101	0.679	1.59	1.149	0.922	0.67	1.127	0.678	0.591	0.515	0.847	0.742	0.852
Q14790	0.886	1.677	1.3	0.516	0.399	0.395	0.751	1.527	0.653	1.204	0.847	0.388	0.263	0.518	1.014	1.303	1.045	0.74	1.525	1.067	1.398	0.74	1.194	1.269	0.592	0.56	0.825	0.599	1.087	0.981	0.725	1.504	0.661	1.112	1.277	1.051	1.17	0.699	1.716	1.23	0.924	0.731	1.218	0.706	0.707	0.596	1.011	0.853	0.855
Q02818	0.842	1.557	1.176	0.509	0.414	0.409	0.783	1.423	0.658	1.059	0.745	0.361	0.205	0.482	0.994	1.192	0.912	0.667	1.381	0.977	1.258	0.622	1.159	1.187	0.551	0.444	0.796	0.647	1.079	1.072	0.746	1.409	0.672	1.139	1.396	1.074	1.121	0.654	1.723	1.192	0.924	0.636	1.15	0.609	0.635	0.555	0.895	0.719	0.89
A0A1W2PQS6	0.793	1.529	1.161	0.478	0.366	0.417	0.688	1.356	0.556	0.942	0.657	0.337	0.223	0.408	0.775	1.007	0.705	0.473	1.106	0.734	0.899	0.426	0.767	0.859	0.562	0.514	0.796	0.566	0.973	0.945	0.646	1.452	0.616	1.071	1.292	0.98	1.033	0.581	1.473	1.072	0.939	0.681	1.139	0.634	0.602	0.524	0.851	0.715	0.823
Q9Y2T2	0.847	1.81	1.456	0.503	0.386	0.343	0.689	1.535	0.945	1.565	1.152	0.458	0.27	0.713	1.419	1.823	1.009	0.708	1.407	1.096	1.428	0.752	1.216	1.402	0.611	0.575	1.09	0.688	1.133	1.068	0.787	1.591	0.7	1.114	1.338	1.102	1.085	0.728	1.601	1.312	0.979	0.785	1.256	0.826	0.781	0.719	1.154	0.898	0.798
P62249	0.79	1.552	1.207	0.466	0.371	0.417	0.763	1.378	0.543	0.938	0.653	0.297	0.207	0.442	0.879	1.015	0.78	0.519	1.219	0.78	1.007	0.477	0.858	0.956	0.56	0.491	0.795	0.57	1.021	0.981	0.658	1.515	0.617	1.155	1.363	1.056	1.135	0.628	1.752	1.132	0.894	0.616	1.121	0.59	0.569	0.503	0.84	0.679	0.88
P68036	0.806	1.911	1.094	0.457	0.359	0.357	0.723	1.292	0.622	1.249	0.881	0.384	0.214	0.634	0.823	0.952	0.617	0.545	1.08	0.776	1.04	0.414	0.876	0.952	0.515	0.531	0.633	0.57	1.015	0.929	0.527	1.044	0.657	0.961	1.184	0.997	0.784	0.501	1.178	1.03	0.936	0.782	1.041	0.576	0.592	0.493	0.664	0.599	0.876
P16989	0.914	1.743	1.34	0.653	0.558	0.576	0.722	1.703	0.443	0.752	0.55	0.374	0.232	0.422	0.624	0.904	0.65	0.576	1.091	0.658	0.929	0.42	0.848	0.875	0.622	0.543	0.733	0.641	1.234	1.199	0.794	1.689	0.705	1.327	1.519	1.172	1.509	0.791	2.589	1.435	0.923	0.734	1.13	0.79	0.682	0.608	1.034	0.707	0.871
P08621	0.796	1.658	1.248	0.484	0.374	0.407	0.803	1.448	0.574	1.026	0.704	0.34	0.202	0.488	0.895	1.116	0.687	0.474	1.079	0.725	0.887	0.374	0.763	0.876	0.588	0.519	0.833	0.593	1.097	1.038	0.692	1.593	0.599	1.045	1.313	0.967	1.048	0.603	1.652	1.095	0.864	0.648	1.092	0.637	0.561	0.489	0.865	0.7	0.787
O75306	0.893	1.807	1.405	0.579	0.448	0.446	0.83	1.697	0.765	1.302	0.94	0.413	0.289	0.677	1.256	1.457	0.971	0.703	1.509	1.094	1.327	0.623	1.167	1.346	0.609	0.546	0.874	0.619	1.099	1.051	0.735	1.619	0.642	1.115	1.395	1.13	1.113	0.651	1.714	1.249	0.888	0.697	1.144	0.728	0.651	0.564	0.971	0.84	0.912
Q9BTV4	0.913	1.626	1.342	0.584	0.433	0.436	0.71	1.525	0.551	0.93	0.633	0.369	0.204	0.402	0.75	1.035	0.688	0.488	1.11	0.737	0.866	0.386	0.772	0.824	0.554	0.492	0.753	0.539	0.959	0.928	0.611	1.439	0.6	1.021	1.179	0.933	1.057	0.612	1.538	0.948	0.83	0.651	1.003	0.625	0.538	0.435	0.812	0.645	0.741
C9J840	0.839	1.231	0.856	0.577	0.476	0.555	0.593	1.176	0.47	0.608	0.507	0.374	0.216	0.341	0.42	0.844	0.652	0.471	1.074	0.715	0.827	0.347	0.7	0.798	0.749	0.531	0.869	0.704	1.191	1.192	0.783	1.772									0.992	0.737	1.101	0.661	0.695	0.536	0.843	0.738	0.876
A0A087WT45	0.812	1.542	1.187	0.512	0.394	0.51	0.732	1.41	0.468	0.723	0.558	0.329	0.221	0.339	0.63	0.831	0.955	0.619	1.439	1.066	1.363	0.644	1.044	1.286	0.612	0.548	0.783	0.625	1.196	1.027	0.819	1.537	0.797	1.176	1.458	1.041	1.096	0.798	1.516	1.321	0.84	0.759	1.317	0.697	0.768	0.575	1.192	0.886	0.791
P49407	0.866	1.601	1.242	0.494	0.47	0.451	0.777	1.523	0.556	0.938	0.655	0.341	0.189	0.439	0.83	1.063	0.802	0.599	1.366	0.942	1.193	0.504	1.072	1.124	0.525	0.549	0.762	0.539	1.147	1.04	0.712	1.547	0.649	1.113	1.353	1.013	1.202	0.675	1.802	1.203	0.893	0.669	1.147	0.653	0.567	0.494	0.886	0.734	0.913
X5CMH5	0.928	1.582	1.208	0.581	0.459	0.539	0.812	1.574	0.461	0.774	0.553	0.317	0.173	0.411	0.769	0.916	0.755	0.54	1.184	0.808	1.072	0.465	0.88	1.048	0.611	0.542	0.821	0.641	1.169	1.112	0.775	1.599	0.677	1.179	1.36	1.114	1.229	0.716	1.742	1.316	0.88	0.667	1.111	0.702	0.701	0.575	1.067	0.831	0.793
Q9NTZ6	0.884	1.69	1.286	0.478	0.418	0.399	0.778	1.536	0.596	1.058	0.736	0.354	0.22	0.522	0.96	1.217	0.727	0.514	1.181	0.783	0.997	0.507	0.867	0.967	0.577	0.512	0.805	0.593	1.114	1.081	0.728	1.543	0.629	1.154	1.366	1.075	1.203	0.699	1.749	1.217	0.916	0.709	1.154	0.722	0.648	0.583	1	0.809	0.825
P00492	0.871	1.7	1.293	0.484	0.384	0.364	0.781	1.459	0.713	1.226	0.825	0.366	0.25	0.537	1.079	1.295	1.156	0.763	1.652	1.293	1.552	0.836	1.502	1.737	0.542	0.511	0.779	0.612	1.113	1.086	0.732	1.575	0.671	1.098	1.354	1.05	1.175	0.673	1.624	1.249	0.926	0.653	1.109	0.653	0.63	0.528	0.859	0.758	0.861
P61088	0.847	1.714	1.323	0.535	0.441	0.436	0.768	1.504	0.667	1.205	0.861	0.362	0.259	0.62	1.148	1.281	0.8	0.578	1.259	0.852	1.125	0.521	0.977	1.063	0.621	0.552	0.803	0.614	1.103	1.123	0.714	1.45	0.683	1.127	1.357	1.095	1.165	0.619	1.684	1.196	0.962	0.669	1.127	0.682	0.668	0.578	0.914	0.789	1.004
J3KR49	0.839	1.998	1.346	0.471	0.361	0.53	0.775	1.721
Q92538	0.81	1.668	1.36	0.518	0.467	0.461	0.784	1.69	0.554	0.899	0.656	0.301	0.229	0.451	0.893	0.953	0.803	0.582	1.273	0.951	1.105	0.574	1.063	1.101	0.541	0.564	0.824	0.624	1.078	1.053	0.733	1.624	0.644	1.009	1.302	1.021	1.046	0.619	1.478	1.123	0.935	0.681	1.132	0.697	0.64	0.588	0.916	0.763	0.845
Q9Y4W6	0.83	1.519	1.147	0.515	0.419	0.468	0.706	1.372	0.523	0.854	0.616	0.352	0.204	0.414	0.674	0.979	0.788	0.572	1.264	0.801	1.023	0.492	0.865	0.972	0.572	0.551	0.8	0.591	0.958	0.978	0.628	1.56	0.636	1.196	1.404	1.083	1.244	0.745	1.801	1.278	0.874	0.661	1.066	0.622	0.564	0.505	0.862	0.71	0.813
Q01469	0.794	1.83	1.558	0.458	0.328	0.439	0.747	1.661	0.616	1.073	1.002	0.328	0.201	0.508	0.905	1.155	0.838	0.515	1.289	0.863	1.101	0.453	0.871	1.1	0.595	0.453	0.788	0.509	0.946	0.88	0.559	1.428	0.593	0.963	1.265	0.958	0.973	0.564	1.544	1.142	0.909	0.646	1.171	0.642	0.522	0.45	0.905	0.708	0.65
Q12768	0.856	1.912	1.45	0.498	0.359	0.343	0.754	1.697	0.961	1.722	1.18	0.375	0.306	0.838	1.628	1.924	1.235	0.852	1.772	1.441	1.735	1.087	1.699	1.674	0.512	0.488	0.786	0.56	0.894	0.887	0.67	1.42	0.614	1.059	1.365	1.063	1.042	0.675	1.316	1.19	0.977	0.639	1.09	0.678	0.611	0.565	0.947	0.814	0.8
P36507	0.904	1.785	1.372	0.506	0.384	0.331	0.729	1.498	0.57	0.943	0.68	0.321	0.217	0.384	0.722	1.038	0.929	0.707	1.499	0.992	1.293	0.61	1.065	1.304	0.604	0.519	0.818	0.594	1.071	0.994	0.681	1.52	0.77	1.141	1.342	1.046	1.145	0.689	1.618	1.175	0.843	0.672	1.043	0.641	0.622	0.528	0.88	0.825	0.809
C9JSZ1																	0.687	0.618	1.196	0.735	0.971	0.42	0.874	0.792	0.63	0.523	0.791	0.636	1.179	1.242	0.883	1.724																	0.942
Q16778	0.903	1.434	1.452	0.503	0.401	0.496	0.777	1.357	0.541	0.955	0.741	0.455	0.261	0.575	0.984	1.082	1.004	0.643	1.769	1.242	1.06	0.554	1.212	1.051	0.726	0.577	0.945	0.812	1.296	1.203	0.749	1.918	0.566	1.017	1.408	0.964	1.039	0.596	1.478	0.938	1.044	0.57	1.127	0.621	0.568	0.52	0.803	0.587	0.877
P62633	0.802	1.408	1.097	0.508	0.415	0.462	0.774	1.271	0.467	0.673	0.552	0.32	0.184	0.46	0.662	0.766	0.734	0.567	1.215	0.821	1.051	0.458	0.919	1.031	0.543	0.461	0.802	0.582	1.044	1.024	0.635	1.431	0.64	1.08	1.415	1.069	1.149	0.641	1.898	1.211	0.937	0.697	1.237	0.682	0.593	0.534	0.929	0.729	0.795
Q12797	0.767	1.467	1.022	0.527	0.534	0.502	0.821	1.447	0.516	0.894	0.707	0.353	0.191	0.452	0.803	1.034	0.697	0.515	1.262	0.831	0.989	0.471	0.941	1.101	0.57	0.477	0.824	0.624	1.069	1.044	0.697	1.607	0.699	1.205	1.407	1.095	1.281	0.687	1.689	1.323	0.847	0.659	1.084	0.651	0.591	0.506	0.875	0.796	0.822
G3V3E8	0.78	1.48	1.161	0.458	0.326	0.389	0.629	1.252	0.515	0.923	0.624	0.316	0.178	0.379	0.735	0.993	0.718	0.483	1.088	0.695	0.872	0.384	0.696	0.798	0.577	0.513	0.783	0.622	1.041	1.022	0.632	1.558	0.565	1.027	1.296	0.964	0.949	0.525	1.539	1.029	0.886	0.63	1.137	0.561	0.529	0.462	0.757	0.651	0.859
Q9UHD2	0.887	1.603	1.27	0.569	0.473	0.538	0.714	1.583	0.597	0.911	0.736	0.354	0.212	0.456	0.869	1.141	0.709	0.584	1.105	0.758	1.008	0.49	0.798	0.803	0.699	0.617	0.841	0.639	1.05	1.078	0.735	1.618	0.699	1.54	1.489	1.331	1.36	0.935	1.708	1.523	0.917	0.672	1.114	0.666	0.644	0.588	0.933	0.756	0.832
P48556	0.934	1.664	1.327	0.51	0.443	0.457	0.844	1.556	0.611	1.067	0.804	0.351	0.238	0.571	1.017	1.193	0.758	0.492	1.163	0.798	1.027	0.464	0.829	0.946	0.573	0.506	0.79	0.562	1.005	0.946	0.647	1.478	0.645	1.128	1.309	0.953	1.089	0.602	1.598	1.169	0.931	0.642	1.164	0.663	0.642	0.561	0.933	0.771	0.911
Q6NVY1	0.878	1.781	1.355	0.517	0.413	0.434	0.846	1.557	0.551	0.873	0.67	0.348	0.223	0.602	0.775	1.034	0.852	0.616	1.322	0.899	1.092	0.565	0.934	1.107	0.534	0.503	0.776	0.534	1.014	0.976	0.658	1.41	0.653	1.091	1.346	1.065	1.127	0.642	1.702	1.146	0.94	0.678	1.095	0.664	0.605	0.532	0.856	0.733	0.839
Q15121	0.855	1.53	1.103	0.489	0.406	0.458	0.893	1.299	0.484	0.81	0.608	0.347	0.186	0.461	0.762	0.816	0.791	0.537	1.166	0.846	1.063	0.468	0.86	0.991	0.564	0.487	0.754	0.589	0.971	0.958	0.623	1.393	0.611	1.096	1.411	1.062	0.982	0.524	1.647	1.189	0.913	0.637	1.142	0.569	0.543	0.462	0.702	0.652	0.831
Q12874	0.794	1.558	1.165	0.466	0.346	0.397	0.705	1.313	0.502	0.843	0.607	0.329	0.189	0.436	0.741	0.931	0.796	0.551	1.201	0.84	0.981	0.47	0.874	0.943	0.571	0.496	0.804	0.543	0.932	0.89	0.602	1.422	0.613	1.03	1.355	0.991	1.006	0.554	1.542	1.071	0.865	0.645	1.047	0.604	0.574	0.512	0.826	0.694	0.863
A0A2R8Y6Y7	0.85	1.629	1.254	0.524	0.426	0.405	0.746	1.541	0.554	0.999	0.716	0.35	0.208	0.478	0.843	1.169	0.729	0.524	1.142	0.751	0.949	0.427	0.821	0.927	0.608	0.525	0.823	0.595	1.073	1.052	0.697	1.592	0.654	1.121	1.383	1.106	1.146	0.7	1.667	1.198	0.9	0.711	1.164	0.702	0.585	0.509	0.926	0.764	0.864
P36543	0.906	1.883	1.315	0.49	0.4	0.436	0.843	1.599	0.622	1.097	0.776	0.38	0.222	0.617	0.93	1.037	0.93	0.671	1.489	1.122	1.317	0.628	1.217	1.376	0.619	0.521	0.758	0.641	1.149	1.083	0.753	1.435	0.664	0.979	1.316	1.006	0.964	0.573	1.484	1.076	0.896	0.62	1.123	0.635	0.578	0.543	0.851	0.682	0.886
Q9Y5K5	0.952	1.714	1.338	0.544	0.438	0.463	0.823	1.716	0.59	1.043	0.767	0.361	0.206	0.554	0.974	1.172	0.89	0.629	1.382	0.917	1.22	0.517	1.047	1.21	0.592	0.544	0.855	0.656	1.163	1.107	0.736	1.675	0.661	0.961	1.418	1.054	0.982	0.64	1.391	1.249	0.868	0.667	1.116	0.66	0.611	0.532	0.89	0.772	0.86
P61081	0.868	1.576	1.235	0.535	0.408	0.439	0.743	1.426	0.531	0.93	0.675	0.349	0.198	0.449	0.77	1.037	0.847	0.577	1.206	0.9	1.132	0.536	0.92	1.057	0.542	0.509	0.779	0.555	1.035	0.985	0.631	1.485	0.612	1.087	1.29	0.982	1.012	0.585	1.585	1.126	0.894	0.652	1.104	0.595	0.601	0.518	0.831	0.702	0.795
Q9NZ01	0.779	1.491	1.13	0.455	0.349	0.384	0.732	1.286	0.577	0.979	0.697	0.346	0.206	0.456	0.88	1.093	0.848	0.574	1.317	0.88	1.06	0.528	0.929	1.019	0.559	0.493	0.794	0.55	0.925	0.914	0.611	1.363	0.629	1.056	1.299	0.958	0.995	0.604	1.434	1.063	0.868	0.652	1.093	0.628	0.56	0.477	0.794	0.705	0.81
P49721	0.825	1.629	1.288	0.502	0.333	0.383	0.674	1.379	0.703	1.169	0.845	0.334	0.203	0.529	0.994	1.257	0.76	0.509	1.145	0.798	0.938	0.463	0.809	0.866	0.541	0.49	0.757	0.53	0.876	0.817	0.553	1.364	0.626	1.019	1.266	0.935	0.957	0.561	1.474	1.038	0.907	0.622	1.069	0.577	0.562	0.508	0.781	0.691	0.837
O15031	0.939	1.71	1.332	0.606	0.474	0.521	0.823	1.652	0.557	0.893	0.699	0.338	0.234	0.47	0.835	1.068	0.879	0.709	1.386	0.999	1.425	0.738	1.311	1.086	0.541	0.531	0.811	0.584	1.116	1.093	0.698	1.607	0.647	1.207	1.365	1.129	1.156	0.779	1.761	1.183	0.89	0.668	1.075	0.654	0.637	0.555	0.966	0.774	0.897
Q9UNN5	0.835	1.739	1.275	0.58	0.399	0.447	0.804	1.6	0.629	1.089	0.741	0.355	0.22	0.49	0.921	1.177	0.914	0.622	1.371	0.978	1.161	0.595	1.071	1.181	0.617	0.613	0.84	0.635	1.017	0.963	0.716	1.539	0.647	1.18	1.457	1.044	1.059	0.702	1.595	1.141	0.883	0.669	1.125	0.654	0.608	0.514	0.862	0.764	0.819
F8WJN3	0.889	1.82	1.343	0.55	0.493	0.567	0.822	1.708	0.646	1.129	0.777	0.356	0.22	0.574	1.025	1.248	0.716	0.535	1.246	0.786	1.034	0.468	0.909	1.05	0.574	0.529	0.807	0.56	1.026	1.029	0.677	1.438	0.658	1.176	1.323	1.068	1.118	0.753	1.514	1.2	0.893	0.667	1.124	0.701	0.58	0.545	0.908	0.757	0.878
Q13043	0.82	1.51	1.208	0.545	0.394	0.446	0.681	1.341	0.669	1.164	0.799	0.375	0.266	0.493	1.077	1.245	0.738	0.516	1.199	0.846	1.002	0.449	0.876	0.882	0.502	0.471	0.747	0.502	0.927	0.858	0.557	1.299	0.571	1.018	1.454	1.107	1.084	0.729	1.462	1.216	0.911	0.686	1.142	0.675	0.645	0.537	0.944	0.813	0.836
P54687	0.96	1.877	1.491	0.598	0.43	0.435	0.856	1.679	0.749	1.292	0.955	0.388	0.25	0.65	1.249	1.461	0.751	0.523	1.127	0.815	1.002	0.489	0.876	0.897	0.552	0.495	0.823	0.558	1.021	0.974	0.666	1.498	0.626	1.144	1.327	1.066	1.081	0.662	1.772	1.151	0.959	0.685	1.124	0.665	0.612	0.524	0.892	0.75	0.863
P78324	0.933	1.647	1.242	0.545	0.462	0.465	0.743	1.547	0.529	0.874	0.637	0.347	0.209	0.452	0.75	0.999	0.805	0.589	1.236	0.871	1.094	0.499	0.973	0.957	0.561	0.543	0.784	0.584	1.056	1.035	0.686	1.629	0.675	1.144	1.352	1.065	1.173	0.673	1.765	1.189	0.915	0.674	1.13	0.668	0.639	0.561	0.877	0.754	0.833
Q14019	0.832	1.538	1.213	0.469	0.367	0.417	0.677	1.354	0.604	1.019	0.709	0.358	0.21	0.445	0.795	1.046	0.746	0.491	1.092	0.78	0.907	0.428	0.743	0.865	0.532	0.458	0.745	0.537	0.914	0.882	0.585	1.372	0.64	1.054	1.307	0.975	0.982	0.574	1.537	1.111	0.905	0.652	1.091	0.596	0.511	0.46	0.781	0.648	0.831
P08311	0.898	1.679	1.423	0.52	0.416	0.478	0.783	1.628	0.553	1.051	0.747	0.349	0.207	0.543	0.971	1.158	0.784	0.537	1.441	0.885	0.985	0.507	1.074	1.111	0.561	0.489	0.805	0.616	1.07	1.082	0.765	1.73	0.651	1.191	1.543	1.235	1.252	0.685	1.905	1.107	1.028	0.661	1.26	0.77	0.646	0.597	1.109	0.756	0.937
Q07666	0.786	1.469	1.126	0.496	0.336	0.396	0.611	1.284	0.492	0.865	0.622	0.335	0.188	0.405	0.65	0.94	0.796	0.561	1.276	0.857	1.046	0.469	0.865	0.992	0.539	0.463	0.796	0.529	0.858	0.829	0.559	1.385	0.614	1.12	1.344	1.012	1.137	0.558	1.72	1.093	0.935	0.693	1.16	0.624	0.562	0.492	0.804	0.655	0.903
Q9UJS0	0.897	1.596	1.242	0.475	0.398	0.372	0.857	1.55	0.716	1.344	0.988	0.415	0.26	0.545	1.144	1.583	1.182	0.879	1.608	1.256	1.714	0.911	1.709	1.614	0.607	0.556	0.769	0.555	1.105	1.052	0.744	1.588	0.691	1.096	1.305	1.057	1.032	0.699	1.548	1.227	0.921	0.668	1.118	0.649	0.622	0.531	0.948	0.744	0.793
P19878	0.943	2.008	1.641	0.574	0.463	0.468	0.918	1.895	0.51	0.805	0.579	0.343	0.219	0.485	0.775	0.898									0.656	0.563	0.916	0.596	1.174	1.232	0.807	1.609	0.709	1.205	1.432	1.149	1.278	0.757	1.824	1.268	0.852	0.685	1.126	0.731	0.666	0.542	0.984	0.747	0.821
O75340	0.833	1.57	1.213	0.507	0.378	0.383	0.666	1.43	0.647	1.079	0.76	0.358	0.231	0.479	0.875	1.181	0.969	0.643	1.471	1.067	1.317	0.655	1.142	1.353	0.539	0.482	0.769	0.538	0.969	0.921	0.65	1.458	0.647	1.11	1.384	1.073	1.137	0.658	1.555	1.202	0.871	0.637	1.085	0.654	0.624	0.532	0.862	0.752	0.834
P62888	0.836	1.521	1.209	0.46	0.381	0.42	0.744	1.353	0.553	1.001	0.737	0.338	0.204	0.533	0.883	1.022	0.807	0.549	1.207	0.842	1.03	0.466	0.861	1.082	0.597	0.501	0.798	0.585	1.013	0.935	0.642	1.482	0.645	1.144	1.339	1.113	1.151	0.655	1.673	1.095	0.921	0.631	1.141	0.586	0.562	0.502	0.811	0.663	0.934
P51452	0.888	1.638	1.253	0.541	0.418	0.401	0.767	1.571	0.632	1.081	0.744	0.367	0.224	0.508	0.985	1.234	0.847	0.563	1.327	0.986	1.182	0.57	0.983	1.095	0.553	0.516	0.734	0.521	0.979	0.857	0.59	1.389	0.776	1.163	1.533	1.139	1.245	0.703	1.754	1.332	0.976	0.764	1.159	0.672	0.697	0.532	0.885	0.81	0.888
O95347	0.878	1.719	1.308	0.559	0.417	0.471	0.742	1.606	1.717	3.904	2.21	0.459	0.6	1.302	3.067	4.677	0.633	0.457	1.009	0.694	0.854	0.38	0.669	0.8	0.577	0.501	0.775	0.571	1.025	0.995	0.647	1.494	0.601	1	1.343	0.917	1.131	0.663	1.924	1.212	0.863	0.653	1.056	0.655	0.587	0.482	0.83	0.702	0.835
Q8NBJ5	0.837	1.665	1.307	0.521	0.435	0.492	0.722	1.593	0.619	1.119	0.783	0.364	0.225	0.496	0.912	1.206	0.896	0.587	1.261	0.972	1.113	0.573	0.971	1.133	0.585	0.547	0.827	0.577	0.968	0.96	0.652	1.528	0.636	1.067	1.295	1.019	0.984	0.676	1.399	1.198	0.924	0.673	1.109	0.643	0.602	0.534	0.834	0.756	0.848
E7EQ69	0.843	1.665	1.25	0.484	0.391	0.418	0.735	1.467	0.611	1.118	0.811	0.361	0.22	0.503	0.962	1.249	0.837	0.612	1.341	0.951	1.151	0.569	1.035	1.124	0.578	0.491	0.803	0.604	1.066	1.026	0.703	1.514	0.673	1.114	1.349	1.074	1.156	0.651	1.788	1.235	0.921	0.689	1.079	0.639	0.578	0.522	0.872	0.721	0.865
Q12882	0.836	1.693	1.365	0.435	0.348	0.337	0.843	1.521	0.863	1.585	1.074	0.389	0.315	0.641	1.519	1.758	1.105	0.762	1.66	1.32	1.333	0.828	1.281	1.462	0.51	0.545	0.716	0.586	0.968	0.993	0.729	1.462	0.596	1.069	1.428	1.041	1.068	0.645	1.517	1.182	0.88	0.64	1.171	0.599	0.612	0.495	0.91	0.781	0.871
P13073	0.847	1.609	1.08	0.498	0.395	0.42	0.784	1.394	0.55	0.96	0.686	0.388	0.221	0.575	0.809	0.935	0.738	0.589	1.218	0.873	1.058	0.48	0.914	1.004	0.612	0.518	0.698	0.606	1.023	1.008	0.626	1.34	0.689	0.965	1.379	0.981	0.93	0.585	1.543	1.092	0.921	0.689	1.133	0.642	0.568	0.489	0.777	0.686	0.867
O75608	0.858	1.555	1.218	0.518	0.389	0.406	0.734	1.384	0.585	0.965	0.73	0.348	0.221	0.521	0.861	1.079	0.78	0.547	1.197	0.858	1.013	0.475	0.892	0.945	0.571	0.506	0.774	0.578	0.992	0.969	0.639	1.389	0.682	1.114	1.297	0.974	1.095	0.594	1.574	1.091	0.95	0.735	1.156	0.712	0.602	0.543	0.93	0.757	0.852
H7BZJ3	0.91	1.645	1.182	0.595	0.521	0.508	0.849	1.569	0.502	0.901	0.684	0.376	0.237	0.56	0.793	1.045	0.778	0.514	1.126	0.816	0.942	0.472	0.823	0.942	0.603	0.506	0.843	0.63	1.139	1.076	0.714	1.527	0.679	1.186	1.363	1.129	1.197	0.655	1.813	1.215	0.987	0.806	1.163	0.738	0.721	0.55	0.943	0.771	0.936
P40429	0.818	1.647	1.288	0.479	0.375	0.387	0.818	1.47	0.579	0.984	0.68	0.313	0.218	0.428	0.838	1.076	0.775	0.506	1.181	0.781	1.013	0.46	0.875	0.984	0.569	0.516	0.778	0.549	1.03	0.953	0.655	1.506	0.636	1.1	1.31	1.009	1.08	0.636	1.625	1.143	0.909	0.685	1.103	0.635	0.564	0.5	0.867	0.721	0.832
P08574	0.917	1.824	1.394	0.581	0.489	0.511	0.768	1.647	0.476	0.802	0.595	0.333	0.183	0.413	0.727	0.902	0.778	0.606	1.254	0.815	1.048	0.472	0.93	0.97	0.592	0.502	0.811	0.634	1.086	1.024	0.718	1.482	0.626	1.111	1.314	1.095	1.249	0.675	1.895	1.206	0.871	0.664	1.143	0.682	0.635	0.532	0.905	0.738	0.864
P19784	0.811	1.606	1.241	0.525	0.359	0.429	0.665	1.451	0.54	0.929	0.663	0.373	0.216	0.448	0.796	1.128	0.768	0.528	1.159	0.811	0.984	0.49	0.766	0.878	0.549	0.541	0.785	0.579	0.97	0.904	0.633	1.503	0.64	1.087	1.334	1.016	0.994	0.66	1.442	1.169	0.91	0.693	1.079	0.62	0.58	0.49	0.843	0.734	0.799
H3BQQ9
F5GWT4	0.866	1.444	1.023	0.46	0.431	0.425	0.712	1.284	0.492	0.724	0.552	0.378	0.223	0.45	0.674	0.848	0.812	0.591	1.231	0.814	1.04	0.506	0.872	0.985	0.715	0.549	0.771	0.726	1.175	1.169	0.846	1.6	0.654	1.11	1.275	0.991	1.149	0.671	1.79	1.161	0.912	0.736	1.131	0.657	0.693	0.563	1.003	0.779	0.867
P09661	0.875	1.432	1.127	0.493	0.386	0.444	0.734	1.304	0.62	0.995	0.764	0.371	0.206	0.464	0.856	1.103	0.751	0.532	1.161	0.832	1.016	0.457	0.881	0.966	0.582	0.495	0.784	0.606	1.034	1.015	0.697	1.443	0.674	1.121	1.399	1.084	1.148	0.627	1.814	1.194	0.906	0.613	1.129	0.596	0.612	0.538	0.874	0.681	0.975
O00743	0.93	1.684	1.308	0.521	0.428	0.414	0.718	1.478	0.617	1.035	0.74	0.351	0.241	0.567	0.983	1.135	0.858	0.593	1.273	0.892	1.136	0.572	0.963	1.116	0.597	0.515	0.791	0.606	1.06	1.019	0.706	1.474	0.622	1.116	1.377	1.047	1.129	0.693	1.699	1.188	0.915	0.682	1.071	0.658	0.595	0.492	0.889	0.733	0.787
Q99805	0.86	1.685	1.297	0.525	0.389	0.387	0.786	1.522	0.59	1.007	0.704	0.374	0.242	0.439	0.868	1.145	0.812	0.587	1.253	0.845	1.087	0.513	0.911	1.026	0.591	0.524	0.745	0.547	0.955	0.922	0.652	1.468	0.671	1.161	1.377	1.042	1.146	0.646	1.766	1.184	0.912	0.67	1.141	0.68	0.619	0.529	0.936	0.758	0.824
E9PDF6	0.78	1.581	1.271	0.553	0.415	0.53	0.679	1.471	0.41	0.612	0.484	0.311	0.189	0.338	0.532	0.751									0.654	0.518	0.756	0.557	0.936	0.873	0.678	1.462	0.666	1.102	1.289	1.052	1.167	0.76	1.539	1.239	0.884	0.686	1.032	0.757	0.612	0.613	0.883	0.951	0.806
E9PL71																	0.569	0.559	1.061	0.699	0.922	0.379	0.811	0.544									0.605	1.279	1.491	1.013	1.297	0.662	2.22	1.05	0.772	0.654	1.039	0.603	0.592	0.487	0.853	0.72
Q9ULC4	0.999	1.796	1.429	0.524	0.371	0.391	0.782	1.56	0.765	1.461	1.012	0.353	0.24	0.611	1.212	1.611	0.844	0.58	1.319	0.896	1.123	0.517	0.978	1.117	0.51	0.479	0.77	0.585	0.961	1.056	0.645	1.541	0.6	1	1.209	0.958	1.044	0.654	1.438	1.16	0.877	0.668	1.042	0.547	0.52	0.44	0.711	0.677	0.705
Q13057	0.863	1.719	1.312	0.535	0.35	0.353	0.798	1.487	1.054	1.928	1.312	0.442	0.291	0.862	1.673	2.043	0.864	0.662	1.385	0.981	1.173	0.657	1.054	1.145	0.562	0.515	0.815	0.595	1.062	1.039	0.664	1.483	0.583	1.18	1.406	1.108	1.082	0.697	1.461	1.192	0.902	0.67	1.136	0.716	0.631	0.577	0.976	0.79	0.879
Q9BT09	0.846	1.606	1.205	0.513	0.381	0.454	0.682	1.436	0.536	0.859	0.609	0.34	0.196	0.39	0.767	0.971	0.788	0.502	1.147	0.795	0.958	0.455	0.808	0.89	0.525	0.443	0.76	0.528	0.891	0.875	0.579	1.368	0.649	1.062	1.277	0.97	1.008	0.567	1.565	1.089	0.921	0.614	1.163	0.562	0.546	0.477	0.826	0.652	0.844
A0A087X1K9
H0Y3U8	0.911	1.867	1.396	0.531	0.432	0.416	0.754	1.644	0.681	1.199	0.834	0.374	0.245	0.599	1.164	1.307	1.174	0.78	1.809	1.396	1.644	0.901	1.583	1.553	0.521	0.527	0.866	0.603	0.995	0.905	0.663	1.743									0.847	0.636	1.083	0.677	0.585	0.565	0.852	0.69	0.845
P61326	0.832	1.595	1.247	0.519	0.369	0.393	0.688	1.394	0.594	1.014	0.696	0.331	0.209	0.448	0.883	1.112	0.742	0.548	1.277	0.804	1.028	0.482	0.906	1.119	0.575	0.527	0.826	0.54	0.957	0.925	0.627	1.453	0.637	1.067	1.239	0.982	1.097	0.692	1.557	1.12	0.849	0.665	1.078	0.631	0.59	0.505	0.877	0.771	0.823
P23919	0.907	1.615	1.24	0.551	0.436	0.418	0.832	1.577	0.543	0.958	0.727	0.372	0.204	0.427	0.748	1.043	0.858	0.598	1.375	0.876	1.113	0.525	0.969	1.166	0.557	0.487	0.812	0.556	0.936	0.947	0.637	1.552	0.667	1.146	1.411	1.1	1.294	0.663	1.972	1.298	0.947	0.693	1.149	0.635	0.614	0.525	0.879	0.765	0.969
K7EIG1	0.84	1.413	1.145	0.554	0.446	0.409	0.737	1.332	0.534	0.895	0.637	0.335	0.219	0.465	0.813	1.014	0.662	0.571	1.176	0.778	0.956	0.467	0.877	1.001	0.608	0.546	0.904	0.713	1.08	0.956	0.702	1.515	0.664	1.164	1.314	1.054	1.258	0.705	1.768	1.182	0.881	0.676	1.056	0.671	0.583	0.533	0.958	0.766	0.83
H0YD13	0.844	1.529	1.201	0.481	0.359	0.368	0.774	1.421	0.575	1.001	0.704	0.34	0.192	0.473	0.867	1.091	0.777	0.516	1.204	0.852	1.008	0.464	0.882	0.99	0.517	0.466	0.767	0.533	0.938	0.91	0.602	1.4	0.689	1.125	1.397	1.042	1.081	0.617	1.61	1.196	0.921	0.666	1.109	0.592	0.532	0.449	0.77	0.699	0.833
Q96CX2	0.868	1.738	1.34	0.559	0.429	0.468	0.813	1.616	0.775	1.256	0.947	0.369	0.245	0.661	1.205	1.424	1.076	0.691	1.489	1.187	1.342	0.774	1.22	1.314	0.573	0.472	0.766	0.58	0.937	0.961	0.566	1.36	0.664	1.13	1.314	1.039	1.169	0.679	1.659	1.231	0.898	0.671	1.143	0.679	0.616	0.539	0.885	0.746	0.853
B4DLR8	0.835	1.433	1.133	0.512	0.385	0.435	0.653	1.33	0.459	0.75	0.592	0.325	0.205	0.384	0.671	0.892	0.74	0.485	1.116	0.768	0.939	0.446	0.758	0.849	0.521	0.441	0.774	0.514	0.914	0.882	0.556	1.376	0.655	1.118	1.389	1.005	0.975	0.562	1.581	1.109	0.886	0.611	1.071	0.56	0.497	0.451	0.71	0.611	0.831
A0A087WXS7	0.876	1.729	1.378	0.505	0.385	0.366	0.841	1.613	0.712	1.313	1.027	0.379	0.227	0.559	1.264	1.545	0.851	0.636	1.264	0.953	1.076	0.607	0.967	1.138	0.733	0.652	0.87	0.751	1.108	1.122	0.705	1.488	0.637	1.197	1.386	1.119	1.09	0.638	1.696	1.306	0.933	0.632	1.14	0.659	0.598	0.527	0.867	0.764	0.912
O00182	0.849	1.671	1.367	0.543	0.45	0.458	0.792	1.628	0.589	1.02	0.747	0.369	0.249	0.562	0.91	1.233	0.722	0.526	1.195	0.785	1.012	0.456	0.851	0.952	0.578	0.55	0.898	0.575	1.128	1.168	0.722	1.753	0.679	1.166	1.415	1.105	1.195	0.652	1.763	1.23	0.862	0.67	1.111	0.668	0.622	0.514	0.926	0.787	0.885
P27105	0.877	1.592	1.259	0.537	0.392	0.379	0.745	1.522	0.649	1.078	0.758	0.355	0.238	0.542	1.017	1.275	0.697	0.486	1.176	0.723	1.101	0.439	0.877	1.167	0.6	0.545	0.862	0.573	1.184	1.1	0.766	1.713	0.64	1.131	1.483	1.053	1.235	0.653	1.825	1.327	0.88	0.664	1.105	0.709	0.608	0.533	0.952	0.748	0.791
Q9UBQ5	0.954	1.814	1.363	0.503	0.402	0.416	0.822	1.629	0.655	1.167	0.837	0.389	0.223	0.495	0.987	1.275	0.855	0.592	1.187	0.891	1.123	0.56	0.916	1.031	0.557	0.501	0.773	0.572	0.969	0.94	0.628	1.453	0.624	1.09	1.312	0.997	1.058	0.551	1.571	1.132	0.925	0.641	1.119	0.584	0.597	0.496	0.817	0.697	0.878
E7EU96	0.876	1.726	1.275	0.523	0.37	0.42	0.778	1.49	0.659	1.191	0.852	0.371	0.269	0.556	1.164	1.362	1.111	0.722	1.639	1.173	1.539	0.776	1.324	1.416	0.631	0.532	0.843	0.62	1.13	1.025	0.732	1.636	0.667	1.18	1.349	1.06	1.1	0.658	1.439	1.246	0.924	0.701	1.146	0.681	0.633	0.586	1.017	0.801	0.804
J3KS22	0.785	1.769	1.411	0.489	0.355	0.367	0.695	1.432	0.654	1.175	0.82	0.392	0.255	0.552	1.064	1.298	0.826	0.657	1.305	0.914	1.151	0.593	0.927	1.096	0.599	0.495	0.808	0.67	1.134	1.097	0.787	1.462	0.702	1.127	1.394	1.174	1.365	0.814	1.8	1.203	0.933	0.76	1.194	0.777	0.742	0.652	1.085	0.869	0.945
P48059	0.86	1.869	1.408	0.483	0.362	0.398	0.773	1.583	0.62	1.126	0.75	0.348	0.213	0.495	0.941	1.179	0.87	0.576	1.353	0.947	1.186	0.546	1.035	1.145	0.568	0.505	0.822	0.615	1.039	0.998	0.673	1.49	0.679	1.13	1.416	1.079	1.088	0.665	1.582	1.209	0.89	0.667	1.086	0.632	0.59	0.486	0.866	0.74	0.816
Q15363	0.845	1.599	1.247	0.521	0.418	0.496	0.743	1.486	0.518	0.851	0.579	0.338	0.207	0.41	0.734	0.946	0.667	0.518	1.164	0.746	0.946	0.4	0.754	0.984	0.582	0.479	0.838	0.561	1.024	0.989	0.683	1.497	0.633	1.138	1.431	1.019	1.137	0.634	1.743	1.208	0.899	0.707	1.142	0.666	0.61	0.502	0.88	0.76	0.839
Q9BRR6	0.833	1.561	1.278	0.52	0.381	0.382	0.693	1.431	0.754	1.124	0.895	0.411	0.279	0.607	1.165	1.358	0.959	0.691	1.532	1.077	1.263	0.651	1.172	1.147	0.613	0.572	0.766	0.598	1.041	1.057	0.747	1.471	0.668	1.14	1.352	1.09	1.05	0.67	1.716	1.049	0.891	0.683	1.17	0.686	0.63	0.586	0.925	0.78	0.85
Q9P287	0.861	1.608	1.277	0.492	0.347	0.381	0.711	1.402	0.666	1.084	0.782	0.36	0.235	0.518	0.919	1.192	0.783	0.539	1.191	0.858	1.076	0.476	0.855	1.018	0.598	0.52	0.83	0.588	1.105	1.054	0.656	1.665	0.64	1.123	1.386	1.117	1.143	0.666	1.468	1.219	0.938	0.654	1.148	0.673	0.601	0.523	0.892	0.745	0.878
O75396	0.845	1.595	1.145	0.475	0.365	0.417	0.715	1.379	0.525	0.951	0.705	0.343	0.188	0.471	0.704	1.002	0.756	0.551	1.248	0.834	0.969	0.464	0.854	0.941	0.564	0.487	0.736	0.546	0.941	0.983	0.595	1.373	0.628	1.014	1.282	0.947	1.019	0.561	1.508	1.061	0.882	0.611	1.048	0.561	0.53	0.452	0.75	0.666	0.796
P20020	0.851	1.657	1.269	0.563	0.448	0.495	0.757	1.63	0.424	0.724	0.56	0.306	0.181	0.337	0.633	0.83	0.861	0.612	1.302	0.946	1.125	0.587	1.042	1.042	0.561	0.505	0.812	0.583	1.003	1.008	0.675	1.569	0.676	1.102	1.35	1.022	1.146	0.601	1.749	1.076	0.871	0.663	1.092	0.662	0.581	0.5	0.836	0.751	0.787
O95747	0.802	1.613	1.311	0.508	0.351	0.4	0.672	1.407	0.601	0.955	0.746	0.371	0.244	0.5	0.877	1.064	0.921	0.705	1.455	1.109	1.638	0.742	1.173	1.425	0.608	0.566	0.814	0.585	1.126	1.006	0.733	1.564	0.653	1.162	1.29	1.139	1.214	0.714	1.513	1.269	0.916	0.708	1.06	0.694	0.603	0.523	0.87	0.77	0.868
P33316	0.878	1.832	1.471	0.625	0.458	0.45	0.744	1.698	0.559	0.904	0.596	0.343	0.233	0.468	0.817	0.944	0.735	0.565	1.207	0.752	0.933	0.464	0.858	0.87	0.594	0.555	0.82	0.582	1.046	1.034	0.705	1.536	0.697	1.19	1.33	1.067	1.226	0.795	1.754	1.107	0.896	0.774	1.063	0.69	0.569	0.491	0.908	0.756	0.797
P51003	0.947	1.753	1.278	0.606	0.514	0.495	0.883	1.751	0.7	1.232	0.854	0.403	0.281	0.535	1.05	1.41	0.98	0.686	1.546	1.201	1.383	0.811	1.254	1.343	0.563	0.513	0.749	0.576	1.007	1.018	0.676	1.451	0.707	1.239	1.397	1.114	1.198	0.802	1.649	1.302	0.916	0.732	1.146	0.725	0.685	0.64	1.092	0.905	0.806
O75351	0.862	1.673	1.251	0.56	0.427	0.439	0.749	1.537	0.54	0.869	0.652	0.343	0.214	0.439	0.781	0.991	0.851	0.623	1.287	0.873	1.157	0.547	1.008	1.073	0.569	0.507	0.783	0.596	1.036	1	0.673	1.445	0.638	1.132	1.321	1.038	1.125	0.642	1.672	1.115	0.951	0.705	1.183	0.668	0.632	0.534	0.979	0.736	0.888
A0A0A0MRM9	0.828	1.376	1.11	0.495	0.371	0.425	0.726	1.366	0.461	0.684	0.529	0.316	0.159	0.37	0.626	0.844	0.742	0.543	1.137	0.746	0.94	0.413	0.786	0.969	0.576	0.456	0.789	0.61	0.996	0.952	0.669	1.437	0.671	1.131	1.32	1.057	1.175	0.647	1.604	1.075	0.933	0.724	1.094	0.652	0.575	0.514	0.811	0.659	0.949
B1AXG1	0.843	1.81	1.53	0.531	0.27	0.315	0.794	1.682	1.104	2.381	1.83	0.484	0.458	1.317	2.269	2.523	0.937	0.642	1.527	1.078	1.181	0.752	1.07	1.462	0.577	0.506	0.795	0.612	1.109	1.099	0.732	1.577	0.668	1.138	1.456	1.051	1.17	0.681	1.809	1.153	0.852	0.617	1.057	0.642	0.622	0.5	0.865	0.727
F8VXU5	0.911	1.644	1.274	0.58	0.452	0.489	0.758	1.497	0.684	1.13	0.811	0.331	0.222	0.537	1.1	1.27	0.853	0.584	1.39	0.897	1.265	0.603	1.056	1.748	0.524	0.494	0.725	0.509	0.956	0.92	0.679	1.365	0.633	1.1	1.327	1.037	1.129	0.671	1.616	1.166	0.866	0.66	1.156	0.688	0.628	0.512	0.928	0.776	0.82
P49354	0.929	1.914	1.603	0.531	0.337	0.309	0.846	1.703	0.934	1.708	1.278	0.398	0.29	0.86	1.631	1.82	0.906	0.614	1.451	1.054	1.265	0.62	1.031	1.23	0.57	0.538	0.894	0.616	1.11	1.096	0.742	1.654	0.665	1.147	1.544	1.129	1.136	0.712	1.509	1.408	0.972	0.666	1.178	0.657	0.664	0.555	0.928	0.913	0.883
O75400	0.849	1.704	1.32	0.552	0.421	0.444	0.759	1.603	0.562	0.91	0.657	0.353	0.207	0.424	0.807	1.042	0.887	0.545	1.265	0.869	1.05	0.555	0.894	1.043	0.585	0.533	0.809	0.579	0.96	0.96	0.65	1.468	0.657	1.109	1.261	0.947	0.971	0.623	1.445	1.022	0.978	0.71	1.092	0.682	0.618	0.533	0.949	0.706	0.854
Q15427	0.78	1.563	1.206	0.517	0.42	0.507	0.693	1.405	0.482	0.845	0.568	0.33	0.204	0.383	0.694	0.908	0.699	0.583	1.233	0.709	0.952	0.449	0.859	0.905	0.586	0.559	0.82	0.641	1.067	1.006	0.745	1.479	0.634	1.158	1.241	1.001	1.156	0.749	1.816	1.125	0.909	0.675	1.158	0.755	0.651	0.586	1	0.85	0.792
[truncated: 2,500 more rows]
[truncated: 47 more columns]
