# Supplementary material for: The Emerging Plasticizer Alternative DINCH and Its Metabolite MINCH Induce Oxidative Stress and Enhance Inflammatory Responses in Human THP-1 Macrophages
Source: Cells. 2021 Sep 9;10(9):2367. doi: 10.3390/cells10092367 (PMC8466537; doi:10.3390/cells10092367)
Supplement: Supplementary file 1 [file cells-10-02367-s001.zip › Supplement 4.csv]

	16h_ctrlLPS_ctrlnoLPS_37	16h_ctrlLPS_ctrlnoLPS_46	16h_ctrlLPS_ctrlnoLPS_55	16h_ctrlLPS_ctrlnoLPS_64	16h_ctrlLPS_ctrlnoLPS_nCounts	16h_ctrlLPS_ctrlnoLPS_Mean	16h_ctrlLPS_ctrlnoLPS_SD	16h_ctrlLPS_ctrlnoLPS_SEM	16h_ctrlLPS_ctrlnoLPS_pvalue	16h_ctrlLPS_ctrlnoLPS_pvalue.adj	16h_DINCH_10000nM_ctrlnoLPS_45	16h_DINCH_10000nM_ctrlnoLPS_54	16h_DINCH_10000nM_ctrlnoLPS_59	16h_DINCH_10000nM_ctrlnoLPS_68	16h_DINCH_10000nM_ctrlnoLPS_nCounts	16h_DINCH_10000nM_ctrlnoLPS_Mean	16h_DINCH_10000nM_ctrlnoLPS_SD	16h_DINCH_10000nM_ctrlnoLPS_SEM	16h_DINCH_10000nM_ctrlnoLPS_pvalue	16h_DINCH_10000nM_ctrlnoLPS_pvalue.adj	16h_DINCH_1000nM_ctrlnoLPS_40	16h_DINCH_1000nM_ctrlnoLPS_49	16h_DINCH_1000nM_ctrlnoLPS_58	16h_DINCH_1000nM_ctrlnoLPS_67	16h_DINCH_1000nM_ctrlnoLPS_nCounts	16h_DINCH_1000nM_ctrlnoLPS_Mean	16h_DINCH_1000nM_ctrlnoLPS_SD	16h_DINCH_1000nM_ctrlnoLPS_SEM	16h_DINCH_1000nM_ctrlnoLPS_pvalue	16h_DINCH_1000nM_ctrlnoLPS_pvalue.adj	16h_DINCH_100nM_ctrlnoLPS_39	16h_DINCH_100nM_ctrlnoLPS_48	16h_DINCH_100nM_ctrlnoLPS_57	16h_DINCH_100nM_ctrlnoLPS_66	16h_DINCH_100nM_ctrlnoLPS_nCounts	16h_DINCH_100nM_ctrlnoLPS_Mean	16h_DINCH_100nM_ctrlnoLPS_SD	16h_DINCH_100nM_ctrlnoLPS_SEM	16h_DINCH_100nM_ctrlnoLPS_pvalue	16h_DINCH_100nM_ctrlnoLPS_pvalue.adj	16h_DINCH_10nM_ctrlnoLPS_38	16h_DINCH_10nM_ctrlnoLPS_47	16h_DINCH_10nM_ctrlnoLPS_56	16h_DINCH_10nM_ctrlnoLPS_65	16h_DINCH_10nM_ctrlnoLPS_nCounts	16h_DINCH_10nM_ctrlnoLPS_Mean	16h_DINCH_10nM_ctrlnoLPS_SD	16h_DINCH_10nM_ctrlnoLPS_SEM	16h_DINCH_10nM_ctrlnoLPS_pvalue
A0A024R442	-0.122466923405797	-0.0764183058818358	-0.00740224836260434	-0.0920789928139286	4	-0.0745916176160416	0.0487018183317948	0.0243509091658974	0.0221341325566729	0.094064255238245	0.0527942651698629	0.0831939355263988	0.0525236072655089	0.0448702720545769	4	0.0583455200040869	0.0169679812140431	0.00848399060702154	0.000466114188549315	0.0120780833055319	-0.115144914057672	-0.134085727931319	0.028804028647378	-0.120294233717712	4	-0.0851802117648313	0.0764090624971168	0.0382045312485584	0.0673044241050298	0.193255242361679	0.0121542002846291	0.023458972823989	-0.0272582070444239	-0.0188590272513159	4	-0.00262601529678044	0.0242839928437259	0.0121419964218629	0.835938650819534	0.925008196439144	-0.194740495944589	-0.0930184141961948	-0.067946151963069	-0.0732635724668858	4	-0.107242158642685	0.0593211440554645	0.0296605720277322	0.0111551848190411
A0A024R4E5	-0.0121975882699289	-0.0237640446948291	-0.0419504749472759	-0.0706866988170904	4	-0.0371497016822811	0.0254922300416598	0.0127461150208299	0.0268195579494754	0.105292887897746	-0.0739403675394341	-0.0900384391795478	-0.0676387168753633	-0.0544477840223764	4	-0.0715163269041804	0.0147796665702832	0.00738983328514161	6.97967916978589e-05	0.00417443660928659	-0.0363469339344605	-0.0666412069331848	-0.0755326311673575	-0.0995356735509143	4	-0.0695141113964793	0.0261140576144812	0.0130570288072406	0.00178854012029904	0.0179031681578278	-0.0171897612975152	-0.0349872995595682	-0.0530390106468143	-0.0411774066749106	4	-0.0365983695447021	0.0149504947686028	0.00747524738430139	0.00272201796402354	0.0287047324902103	-0.0752133472062086	-0.0727798753163921	-0.0515620574289735	-0.0254350473762706	4	-0.0562475818319612	0.0231256236139372	0.0115628118069686	0.00280992628328535
A0A024R4M0	-0.0833356786141334	-0.0751109246950492	0.0146915224880124	0.00356367832307508	4	-0.0350478506245238	0.0513212744750618	0.0256606372375309	0.220975833625137	0.40583836272709	-0.204955537535663	-0.145430439521564	0.0555544803148874	-0.0382193222304902	4	-0.0832627047432074	0.115431206029342	0.0577156030146708	0.199220605007616	0.457866188570327	-0.13362035728018	-0.0631773516296135	-0.0611773381902874	-0.090054620540029	4	-0.0870074169100275	0.0337496500616468	0.0168748250308234	0.00210281153179248	0.0200529945129611	-0.0649072628749825	-0.0632209802885122	-0.02529402016391	0.0308940079457836	4	-0.0306320638454053	0.0449102028639856	0.0224551014319928	0.221473225693063	0.460463247090872	-0.10417962608555	-0.0401351121888048	-0.0515620574289735	-0.0368850681198088	4	-0.0581904659557843	0.0312988520856571	0.0156494260428285	0.00987129151774229
A0A024RCR6	0.0333508850720662	-0.0024831246076519	0.0522037068327528	-0.0794569084448227	4	0.000903639713086097	0.0581773394907673	0.0290886697453836	0.976225269016393	0.98535191593875	0.161126886957936	0.124569863321938	0.21043101731971	0.139216938489206	4	0.158836176522198	0.03753384993378	0.01876692496689	0.000148652866575753	0.00624135577303474	0.146809225876986	0.0477685335302514	0.133920734461592	0.0249379017499022	4	0.0883590989046829	0.0609976016568425	0.0304988008284212	0.0274368878880103	0.105198226066259	0.046833164809871	-0.0746710010320504	-0.00386263963239891	0.0232323062377168	4	-0.00211704240421538	0.0526176025208448	0.0263088012604224	0.938481209957568	0.968057128726524	0.0310714459330059	0.00408888806787866	0.13655051587147	0.0208586048976642	4	0.0481423636925046	0.0599792458923228	0.0299896229461614	0.159550211094045
A0A075B797	-0.129831385752105	-0.209220791667691	NA	-0.163546307512183	3	-0.16753282831066	0.0398445567670784	0.0230042655752141	0.000331175919910248	0.00562440902184651	-0.35783805498898	-0.295006795572074	NA	-0.17523880133878	3	-0.276027883966611	0.0927672958143032	0.0535592232103816	0.00164069473691851	0.0275454372746566	-0.201932999652435	-0.0934773919055001	NA	-0.123514536485354	3	-0.139641642681097	0.0559974765380176	0.0323301581531642	0.00357731592006902	0.0290705000708835	-0.258647088592855	-0.0920182445959472	NA	0.0445833624938842	3	-0.102027323564973	0.151862809347526	0.0876780338566868	0.222996975640615	0.461817398137476	-0.206773051439486	-0.153975958164373	NA	-0.0762138701021955	3	-0.145654293235352	0.0656761946085419	0.0379181686365919	0.00588714931799666
A0A087WT44	-0.00270167689606567	0.0713931883455111	-0.0977437019841632	-0.0336924913348888	4	-0.0156861704674016	0.0702592292262003	0.0351296146131002	0.670883718964555	0.801554528550272	0.103724575913014	-0.0622600591613502	-0.0825547088683296	0.16327420578007	4	0.0305460034158511	0.121623209881766	0.0608116049408828	0.633351171679367	0.809880563480661	-0.00900124609242692	-0.0357618940492129	-0.756492815604822	0.123309642167181	4	-0.16948657839482	0.397468565795409	0.198734282897705	0.426480945266602	0.621579599246485	0.20237661596017	-0.0900804403544546	-0.129041945001739	-0.0156986863579879	4	-0.00811111393850292	0.147993121538184	0.073996560769092	0.916289195523974	0.962017782902434	-0.0752133472062086	0.0809448114605073	-0.0228864293444176	0.0909191883326121	4	0.0184410558106233	0.0809092236148938	0.0404546118074469	0.664533944000831
A0A087WT45	0.0542978235169779	-0.0492090612522922	0.0493525299346293	-0.0557749894131622	4	-0.000333424303461798	0.0603209811921054	0.0301604905960527	0.991537977463652	0.995159132095824	0.217316827805592	0.185214872466908	-0.0414963020731324	-0.0285691521967709	4	0.0831165615006491	0.137156651303829	0.0685783256519145	0.271071869756677	0.529829451803066	0.161146685898253	0.179338034720879	-0.0647527924141147	-0.0728328800114422	4	0.0507247620483938	0.138246074893357	0.0691230374466787	0.490719840362276	0.675086521985544	0.142819771279714	0.105224875614312	-0.0915672395830761	-0.0267903008875351	4	0.0324217766058537	0.110102005294828	0.0550510026474139	0.577385110955102	0.759545339607168	0.361173472266069	-0.163116612020842	-0.0461417816447205	-0.0821326272894693	4	0.0174456128277592	0.234315130424081	0.11715756521204	0.886505616040724
A0A087WTP2	NA	NA	NA	NA	0	NA	NA	NA	NA	NA	NA	NA	NA	NA	0	NA	NA	NA	NA	NA	NA	NA	NA	NA	0	NA	NA	NA	NA	NA	NA	NA	NA	NA	0	NA	NA	NA	NA	NA	NA	NA	NA	NA	0	NA	NA	NA	NA
A0A087WU02	-0.183995224991954	-0.0764183058818358	-0.00443678988604308	NA	3	-0.0882834402532776	0.0903653360789422	0.0521724511105883	0.0990536630118433	0.245240969111222	-0.09089919469927	0.0816384690243574	-0.327050327642617	NA	3	-0.112103684439177	0.20516787253155	0.118453726435153	0.309308084177218	0.568492810187114	-0.119470839460462	-0.0471217562137607	-0.189958266795931	NA	3	-0.118850287490051	0.0714202772494172	0.0412345162955487	0.0183360350888578	0.0829787935233788	-0.166724599151816	0.0306010420680086	-0.0691361934437487	NA	3	-0.0684199168425185	0.0986647706115552	0.0569641318721141	0.21059746232763	0.446762195520298	-0.306826655364259	-0.0331351225176235	-0.131577258150781	NA	3	-0.157179678677555	0.138630360096941	0.0800382757198238	0.0657888444102936
A0A087WUC6	-0.0480256674055559	-0.0659922800841264	0.0998309749624231	0.022422705574391	4	0.00205893326178294	0.0755281188762806	0.0377640594381403	0.958290179577541	0.976377220378465	-0.117958206923691	-0.0400774393753352	0.142215651099256	0.0524674198941354	4	0.00916185617359125	0.112786971560381	0.0563934857801904	0.876274626171708	0.939353969828749	-0.0788890286838355	-0.0993779933451845	0.0701448240282776	0.0580056034355654	4	-0.0125291486412943	0.0889878128606648	0.0444939064303324	0.787715801093053	0.873392915702912	-0.0687425200053113	-0.0405900057889442	0.0380680408335195	0.0155296982936044	4	-0.0139336966667829	0.0492843392212048	0.0246421696106024	0.592273233276179	0.771065676815928	-0.0818464395386557	-0.0627660866883728	0.0328095597501013	0.056314142679675	4	-0.013872205949313	0.0685964498315299	0.0342982249157649	0.699898934328454
A0A087WUQ6	0.394308277387798	0.257233786137651	0.326351281921548	0.528775371599181	4	0.376667179261544	0.115821896947481	0.0579109484737407	0.000629024525033041	0.00836820777508243	0.49649823493894	0.109383459507262	0.673936130543433	0.736022347946997	4	0.503960043234158	0.281952207849857	0.140976103924929	0.011716361615361	0.0865979490543677	0.570600560896059	0.256211396182476	0.357426776108749	0.599195702127816	4	0.445858608828775	0.166191729727734	0.0830958648638671	0.00171896688159359	0.0175555300103292	0.306713275774905	0.072726517740685	0.458730089306241	0.619926172975987	4	0.364524013949455	0.232803857149845	0.116401928574922	0.0202833589861963	0.101704463071588	0.321509254692553	0.255736533599866	0.265651936108929	0.545200671845784	4	0.347024599061783	0.135252615247898	0.0676263076239492	0.00215383812597358
A0A087WUX8	-0.261146237800186	-0.0124585838214465	-0.256257719026636	0.00474961759321813	4	-0.131278230763763	0.147317407622893	0.0736587038114464	0.124986737410291	0.282599033052589	-0.172358239351826	0.142585019875668	0.116324117967232	0.0494333598045021	4	0.033996064573894	0.143049966121133	0.0715249830605666	0.65137961203368	0.81908405295583	-0.264031775414401	-0.0459817363670918	-0.0224212947077952	-0.0029624138558615	4	-0.0838493050862873	0.121402587844778	0.0607012939223891	0.216412813382137	0.409396705165332	-0.134211785633325	0.156725503687453	-0.061065151185732	0.156679580654523	4	0.0295320368807298	0.149849441977702	0.0749247209888509	0.707093292305159	0.849917702838368	-0.0952048223936747	-0.0471692316373544	0.0139056020252182	0.12471359033002	4	-0.000938715418947609	0.0949249093659586	0.0474624546829793	0.984861725653909
A0A087WVM4	-0.123936811501252	-0.0856032985126916	0.139247610588239	0.0130240075721414	4	-0.0143171229633908	0.117512920919825	0.0587564604599127	0.815604826347321	0.897370805499402	-0.0219031021077383	0.116996643617137	0.127888869600154	0.092814706189887	4	0.0789492793248598	0.068814093344989	0.0344070466724945	0.0615572771580103	0.24222110083417	-0.153443959813929	-0.134085727931319	0.0975948023132988	0.0394083845582354	4	-0.0376316252184286	0.125082959915931	0.0625414799579654	0.569391495427657	0.731210913626936	-0.150376605064332	-0.00546821263951319	0	0.0293649192590389	4	-0.0316199746112015	0.0806350461556734	0.0403175230778367	0.462709213156199	0.682609943298254	-0.0818464395386557	-0.0613412025815449	0.0880791581159129	0.0495631006885952	4	-0.00138634582892313	0.083002678720933	0.0415013393604665	0.974435288529967
A0A087WVQ6	0.0107563968237169	-0.00124102806868964	0	0.0235932492823289	4	0.00827715450933904	0.0115446450488061	0.00577232252440304	0.201581828790726	0.383018144836182	-0.0347375138437623	-0.0708834861565099	-0.0692884540944561	-0.0609906298891484	4	-0.0589750209959692	0.0167301910421481	0.00836509552107406	0.00040738979216418	0.0112985260707552	0.00596978110111668	-0.0654856641874756	-0.0189491028009902	-0.0450878895285381	4	-0.0308882188539718	0.0310894865599653	0.0155447432799827	0.0940996583059799	0.239447194494089	0.00851867956812349	-0.0294062672962684	-0.00967605934904048	0.00156051398761693	4	-0.00725078327239212	0.0165636384294318	0.00828181921471589	0.414968114657015	0.647958993082726	-0.0446558802302389	-0.0247797224784713	0.0293908495226369	0.0400582519217556	4	3.37468392059247e-06	0.0411366333996948	0.0205683166998474	0.999874408572691
A0A087WW23	-0.204065142592918	-0.233808670714108	-0.184021902378925	-0.118950364637195	4	-0.185211520080787	0.0486795577989501	0.0243397788994751	0.000268320188744665	0.00491595109439468	-0.197064751916198	-0.538772867701089	-0.198726230667078	-0.145382817179521	4	-0.269986666865971	0.180893888383271	0.0904469441916356	0.0244769826720482	0.138048355629854	-0.31894011651679	-0.292698964971008	-0.18800736042577	-0.080635468207635	4	-0.220070477530301	0.108812174570855	0.0544060872854274	0.00676460400063259	0.0432333993528802	-0.325900359502436	-0.383249542260393	-0.204819791888498	-0.134072618349662	4	-0.262010578000247	0.113166099415719	0.0565830497078594	0.00357564301336077	0.0352090189882397	-0.258435171261979	-0.134367673539224	-0.238786859587117	-0.128845372457798	4	-0.190108769211529	0.0680644969332466	0.0340322484666233	0.00139861204421564
A0A087WW65	NA	NA	NA	NA	0	NA	NA	NA	NA	NA	NA	NA	NA	NA	0	NA	NA	NA	NA	NA	NA	NA	NA	NA	0	NA	NA	NA	NA	NA	NA	NA	NA	NA	0	NA	NA	NA	NA	NA	NA	NA	NA	NA	0	NA	NA	NA	NA
A0A087WWP4	-0.232323402634432	0.277844065812937	0.133874438489387	0.130675596226415	4	0.0775176744735768	0.217664884341286	0.108832442170643	0.503042852466443	0.6732930515016	0.360534709974346	0.0533494245929337	-0.00314999042364958	-0.236870825352139	4	0.0434658296978729	0.245894310045365	0.122947155022682	0.735779652940307	0.865408805935312	0.259374008195	-0.132874905333272	0.166307552397313	0	4	0.0732016638147604	0.174312826299782	0.0871564131498911	0.433156451016581	0.625325669256506	-0.0484046319630541	-0.0201522583966262	0.0343061220373204	0.208946890271496	4	0.0436740304872841	0.115405301902057	0.0577026509510283	0.477779366820606	0.693988766034027	-0.187568840542334	-0.120947157776902	0.142892042745296	0.0111621062873001	4	-0.03861546232166	0.146501874495558	0.0732509372477791	0.616992095460941
A0A087WWU8	-0.0369065754419822	-0.0024831246076519	0.0364520412268232	-0.10225677781796	4	-0.0262986091601928	0.05884157759879	0.029420788799395	0.405811916111581	0.585565911378157	0.0316839880334311	-0.0148988763793384	-0.0594182100703948	-0.100883357012661	4	-0.0358791138572408	0.0571097883625905	0.0285548941812952	0.255640112730197	0.514514021826489	0.0926731400390102	0.133785882906472	0.157128125622917	0.01032080567772	4	0.0984769885615298	0.0645287303888017	0.0322643651944009	0.022448731525172	0.0932177409348833	-0.00734197534116807	0	0.060435853861974	-0.0331668639351994	4	0.00498175364640165	0.0396113048664077	0.0198056524332039	0.809796375752871	0.910042544201089	-0.00629540653147875	0.0310559356681481	0.109283650102477	-0.0791702134336078	4	0.0137184914513846	0.0784477620833496	0.0392238810416748	0.738476704139582
A0A087WWW7	0.364218616981607	0.146160956747483	0.198355810837042	NA	3	0.236245128188711	0.113859501464422	0.0657368138202808	0.00774910031878218	0.0455684924628819	0.364983356856957	0.170656776776738	0.460718271387495	NA	3	0.332119468340396	0.14779696898204	0.0853306198271917	0.00557203915686451	0.0545122147935321	0.42818796218857	0.0940059809211168	0.298811357871143	NA	3	0.273668433660277	0.168503780756887	0.0972857031794586	0.0200591456744039	0.08775513368122	0.205555526627677	0.0341588614811978	0.157009113557027	NA	3	0.132241167221967	0.0883419072698563	0.0510042239429765	0.0268858238212985	0.121126446217266	0.13578931728144	0.0390487264216787	0.13655051587147	NA	3	0.103796186524863	0.0560742369380399	0.0323744757907802	0.0122223133225515
A0A087WXB0	NA	NA	NA	NA	0	NA	NA	NA	NA	NA	NA	NA	NA	NA	0	NA	NA	NA	NA	NA	NA	NA	NA	NA	0	NA	NA	NA	NA	NA	NA	NA	NA	NA	0	NA	NA	NA	NA	NA	NA	NA	NA	NA	0	NA	NA	NA	NA
A0A087WXL6	0.056894935003017	-0.06989321542403	-0.0298396374823597	-0.148966812327954	4	-0.0479511825578316	0.0856472352088493	0.0428236176044246	0.305637057870258	0.491647155937714	0.0328027899823968	0.0878502979576204	-0.0463620572449485	-0.159355759732125	4	-0.0212661822592641	0.107282173670064	0.0536410868350322	0.705486249292407	0.849022637277878	-0.0715363623967605	-0.0516908654672134	0.0717740676129361	-0.187791422235826	4	-0.059811145621716	0.106296815885899	0.0531484079429497	0.303427984525202	0.502395817726287	-0.11425717925768	0.100141975321086	-0.137503523749935	-0.0492326762948347	4	-0.0502128509953409	0.106971759624694	0.0534858798123471	0.384067724251378	0.618673251848825	0.0634929236253834	-0.123918724308193	-0.0479462784914684	-0.210767096216821	4	-0.0797847938477746	0.116399259356454	0.058199629678227	0.21947880833983
A0A087WXS7	-0.027247175143223	-0.0453635813009973	-0.00295634333141221	-0.0179516423317247	4	-0.0233796855268393	0.0177466025734638	0.00887330128673192	0.0388076645464434	0.136413453399882	0.11855417092968	-0.0249176322043295	-0.0496150350400361	-0.0577154978562874	4	-0.00342349854274329	0.0825062196953023	0.0412531098476511	0.936560750593023	0.965937224541022	0.00596978110111668	-0.0256139386731299	0.119814967154862	-0.061979668927311	4	0.00954778516388437	0.078579422771408	0.039289711385704	0.816092304082401	0.890309287347924	0.0876064287140947	-0.153418789260091	0.0286447869468938	-0.0589587471149937	4	-0.0240315801785239	0.105196326848367	0.0525981634241834	0.663824404935142	0.821424959524738	-0.0446558802302389	-0.00821270742050462	0.106041637410325	0.0790342191797588	4	0.033051817234835	0.0711410392067041	0.0355705196033521	0.388643979770678
A0A087WY55	-0.027247175143223	0.0355331389889431	0.0720057143498097	-0.0264061372563963	4	0.0134713852347834	0.0488576388532619	0.0244288194266309	0.601239489724586	0.753543522984006	0.0428331551196613	0.00984778595634717	0.195395688958431	0.14491366865873	4	0.0982475746732924	0.0866040048663694	0.0433020024331847	0.0637646327049191	0.246484603267063	0.0908019399830606	0.0857086465281696	0.155592526711692	0.0693320211083555	4	0.100358783582819	0.0379446357428969	0.0189723178714484	0.00184787130920538	0.0181958142271266	-0.0358375225257605	-0.0146282119249891	0.0806394245851552	0.00778574496659536	4	0.00948985877525024	0.050666943690207	0.0253334718451035	0.720842516907355	0.859947485639674	-0.0511496423157392	-0.00684067209038051	0.19417254768899	0.0657128406819248	4	0.0504737684911987	0.107228465106651	0.0536142325533254	0.382828360145363
A0A087WYS3	-0.0452378500339366	0.361329051316019	NA	0.037566191834933	3	0.117885797705672	0.214854812917349	0.124046484074518	0.307506241728163	0.493675713618819	-0.0300572338561796	0.106326901073923	NA	0.16467692348016	3	0.0803155302326346	0.0999389391986721	0.057699773448879	0.15705629111192	0.400997608134574	-0.0841639707245099	0.144810351592608	NA	0.124667472894132	3	0.0617712845874099	0.126784296929004	0.0731989479609778	0.359441236898311	0.560965853971912	0.0012200381622561	-0.0312642135168508	NA	-0.291416207203616	3	-0.107153460852737	0.160400674628769	0.0926073726751174	0.225248024318693	0.464795069976388	-0.197138991993106	0.211628181309969	NA	0.0441394287335729	3	0.0195428726834786	0.205490616378682	0.118640062682174	0.851672005116101
A0A087WZ70	NA	NA	NA	NA	0	NA	NA	NA	NA	NA	NA	NA	NA	NA	0	NA	NA	NA	NA	NA	NA	NA	NA	NA	0	NA	NA	NA	NA	NA	NA	NA	NA	NA	0	NA	NA	NA	NA	NA	NA	NA	NA	NA	0	NA	NA	NA	NA
A0A087WZF1	0.0685244250849362	0.0959751995792667	-0.199199430282423	0.138260191454406	4	0.0258900964590465	0.152776460833813	0.0763882304169066	0.746211180891992	0.849320933673378	0.111158427683852	0.211054877402167	-0.224229079816065	-0.173465359147561	4	-0.0188702834694019	0.212794829187553	0.106397414593776	0.865064152450408	0.934627924538093	0.247665114606739	0.209244519369396	-0.164799969264445	-0.0681715026415792	4	0.0559845405175277	0.203625953170216	0.101812976585108	0.602256168205809	0.759505483389787	0.128376034516393	0.074455331657436	-0.00967605934904048	-0.0985322922371026	4	0.0236557536469214	0.0993107289705421	0.0496553644852711	0.650643086910529	0.809421420465238	0	0.211628181309969	-0.143103511531809	-0.094043489915138	4	-0.00637970503424446	0.156999445420913	0.0784997227104563	0.937870073855117
A0A087WZK0	0.0775052146783029	0.108686251328821	-0.0945868187969804	-0.0264061372563963	4	0.0162996274884367	0.0938100891520214	0.0469050445760107	0.740079256051537	0.845943360870717	0.498929061193702	0.166260546739407	-0.102685663974564	0.078002512001273	4	0.160126613989955	0.25208423521948	0.12604211760974	0.250971892868304	0.51129852528282	0.269335118245202	-0.00996875779629458	0.0136265007438804	-0.149539053493569	4	0.0308634519248046	0.174526198067391	0.0872630990336955	0.735672743861001	0.846569739128971	0.354273624987297	-0.0256975376423093	-0.182759804879585	-0.118733719730095	4	0.00677064068382686	0.240475668195356	0.120237834097678	0.956922884933056	0.975312839228803	-0.0774209911578604	-0.0930184141961948	0.00348898607987985	0.0055918482443539	4	-0.0403396427574554	0.0522198236014426	0.0261099118007213	0.173301167111756
A0A087X0W8	-0.219695794306683	0.0713931883455111	-0.100907508166334	-0.164879051293695	4	-0.1035222913553	0.126310723889176	0.0631553619445879	0.152290059448807	0.322536777172819	-0.211564321611313	0.126079748379575	-0.0545082959465884	-0.193094165896493	4	-0.0832717587687049	0.156178672388221	0.0780893361941105	0.327275816461921	0.581109025100388	-0.507327360456029	-0.0110806615437338	-0.249747003702566	-0.141355849245541	4	-0.227377718736968	0.210599434780625	0.105299717390313	0.0741445269103299	0.205503359535505	-0.224020745483222	0.168104565817943	-0.14388243631264	-0.0736719118806994	4	-0.0683676319646545	0.169191817309327	0.0845959086546637	0.449840813441385	0.672204043021902	-0.138341325771673	0.0337251224441324	-0.172328583285633	-0.0211646099980423	4	-0.0745273491528041	0.0969595870225713	0.0484797935112857	0.175137079119839
A0A087X188	-0.0466310853338031	0.00865743299754837	0.0621386848904728	-0.0920789928139286	4	-0.0169784900649276	0.0669230648917622	0.0334615324458811	0.629977778597882	0.771021386518784	-0.00458362590771205	-0.0215703104222184	0.0973314026241843	-0.0675632838126346	4	0.000903545620404796	0.0695730349962248	0.0347865174981124	0.980120392203464	0.986568760584064	0.00497653146402599	0.0327403242979196	0.157128125622917	-0.0029624138558615	4	0.0479706418822504	0.0743639440584608	0.0371819720292304	0.244484217338226	0.439141882955113	0.0157805826905786	-0.0405900057889442	0.0361883076152968	-0.0951927188919706	4	-0.0209534585937599	0.059193560995388	0.029596780497694	0.505525667068639	0.712449459929369	-0.0730090762794785	0	0.114133049763872	-0.0282890444314237	4	0.00320873226324258	0.0798243163693029	0.0399121581846514	0.938537734755653
A0A087X1G7	0.125305935480006	0.24890651891504	0.310959231504566	0.233394431323378	4	0.229641529305747	0.0772090429247462	0.0386045214623731	0.00100905731342568	0.0111327746660067	0.272347666159072	0.202492863898743	0.307698658583223	0.333822805693682	4	0.27909049858368	0.0569406582580392	0.0284703291290196	6.48767907503699e-05	0.00400250078445649	0.296378759496953	0.246009074366167	0.418882979230139	0.37452233954013	4	0.333948288158347	0.0774702742975616	0.0387351371487808	0.000134051351536393	0.00368397486995014	0.334082295171992	0.204873299354091	0.300162886203699	0.273664429067257	4	0.27819572744926	0.0547800926200024	0.0273900463100012	5.29984241637442e-05	0.00232930192556909	0.364430121596773	0.335783289801902	0.322626567445614	0.40731314621951	4	0.35753828126595	0.0374928529178762	0.0187464264589381	1.34345999334451e-06
A0A087X1H5	-0.200959231725097	0.0367429462220097	-0.0298396374823597	0.0932580668719972	4	-0.0251994640283624	0.127517418372456	0.0637587091862282	0.706340604598144	0.825383706107534	-0.0763508861301148	-0.0232430005120753	-0.157783339913372	-0.0495600491127441	4	-0.0767343189170765	0.0582204228464659	0.029110211423233	0.0387475752736192	0.182799951015651	-0.120554350619833	-0.0144215238029256	-0.0955073309286236	0.00295634333141221	4	-0.0568817155049925	0.0603589369080425	0.0301794684540213	0.108433753374269	0.258921987717548	-0.238347526982324	0.070995629661569	-0.156725503687453	0.0339473319233375	4	-0.0725325172712176	0.148908656177351	0.0744543280886754	0.367586175696787	0.604331740030543	-0.288808820305498	0.058839092181686	0.0225290290203779	0.0803596166463261	4	-0.031770270614277	0.173012907236759	0.0865064536183796	0.726031470698473
A0A087X1Z3	0.195341704972161	0.161769865244577	0.159220634355222	0.187133769137541	4	0.175866493427375	0.0180926773126321	0.00904633865631605	1.19972648063455e-06	0.000157685789172097	0.143626982273033	-0.104130810482734	0.294931362509345	0.452270405477819	4	0.196674484944366	0.236841403952668	0.118420701976334	0.147817594172065	0.390264268281355	0.152202484647204	0.200625671718839	0.342657316778408	0.42388841686111	4	0.27984347250139	0.125515213911394	0.0627576069556968	0.00428706667877118	0.0323187096506865	-0.0333371838741124	0.0162813707509418	0.167351057778486	0.227735742410758	4	0.0945077467665183	0.123179461190581	0.0615897305952906	0.175812088285854	0.4035339048265	0.106915203916512	0.203353791331046	0.231842965655045	0.287340312349927	4	0.207363068313132	0.0755015953503687	0.0377507976751844	0.00152486769290446
A0A087X2D5	-0.0494215988554311	-0.0790366279088495	0.0450651715315313	NA	3	-0.0277976850775831	0.0648151941398695	0.0374210697842315	0.415279846036958	0.596102077193601	0.143626982273033	0.0878502979576204	0.0187568627875985	NA	3	0.083411381006084	0.0625532946602628	0.0361151615108007	0.039811363606693	0.185793319049614	-0.0990372472060401	0.0573475103422688	0.0521006485585161	NA	3	0.00347030389824826	0.0888128983576889	0.0512761507743225	0.938666310623119	0.964182214411719	-0.0867764428355729	-0.0109572301964921	0.0622842782543427	NA	3	-0.0118164649259074	0.0745340751348105	0.0430322683428826	0.756055747435823	0.87906020173019	0.309732086916199	0.0243612830941396	0.0293908495226369	NA	3	0.121161406510992	0.163326361209625	0.0942965186101388	0.185196675439834
A0A087X2I1	-0.063455707975162	-0.0313505391666366	-0.0373969886604418	0.00948364986689298	4	-0.0306798964838369	0.0301824085812642	0.0150912042906321	0.0883004004403084	0.226983087186269	-0.044143871800833	-0.0657032470508297	-0.0431163977412943	0.017184442968845	4	-0.033944768406028	0.0356414445852494	0.0178207222926247	0.105466760790413	0.329155029754534	-0.000997369580606922	-0.0368938635391327	-0.0276453017708076	-0.0238714036188422	4	-0.0223519846273474	0.0152513788068759	0.00762568940343793	0.0262480430345259	0.102120764598934	0	-0.0294062672962684	-0.0351418061202571	-0.0156986863579879	4	-0.0200616899436284	0.0156656549334597	0.00783282746672983	0.0428375541391748	0.163714192367542	-0.0317553915224327	-0.0684797378827665	-0.0105178719139993	0.0194773744993038	4	-0.0228189067049737	0.0369912743106607	0.0184956371553304	0.263430845051305
A0A096LNZ9	0.0529975124412194	0.125840972367887	0.269909071862075	0.371265801847587	4	0.205003339629692	0.142861719049253	0.0714308595246267	0.0284287706182245	0.109897920177612	0.0170600534366497	0.0628408735702314	0.316569011767788	0.413858345113579	4	0.202582070972062	0.192852886875633	0.0964264434378165	0.0803778896136062	0.283526674798053	-0.00799832979142667	0.125714840648455	0.277790659995539	0.319855044076755	4	0.178840553732331	0.149896986631567	0.0749484933157835	0.0543084367742246	0.166505481103936	0.117166226441209	0.132035311110422	0.312640326495016	0.321928094887362	4	0.220942489733502	0.11147583437478	0.0557379171873902	0.00741810634945353	0.0548286931403374	0.160354462877973	0.14035457815896	0.248111354799793	0.298772187070229	4	0.211898145726739	0.0744619116789667	0.0372309558394834	0.00127004558448144
A0A096LP69	NA	NA	NA	NA	0	NA	NA	NA	NA	NA	NA	NA	NA	NA	0	NA	NA	NA	NA	NA	NA	NA	NA	NA	0	NA	NA	NA	NA	NA	NA	NA	NA	NA	0	NA	NA	NA	NA	NA	NA	NA	NA	NA	0	NA	NA	NA	NA
A0A096LPI6	0.00538822303603131	0.0221578679239389	0.0832003004183023	0.135014531950752	4	0.0614402308322561	0.0593621934318284	0.0296810967159142	0.0838860331703205	0.218987459649291	-0.0359099601016175	-0.0778195333668864	0.185745518924711	0.200676940180739	4	0.0681732414092367	0.145519384449731	0.0727596922248654	0.384940919854648	0.628536888682357	0.0109257977952124	0.0273349412758291	0.192003166901377	0.299560281858908	4	0.132456046957832	0.138190367653683	0.0690951838268414	0.103695362676036	0.253325765325205	0.0385383860781497	-0.0613214473730307	0.111317022864158	0.174774401103708	4	0.0658270906682463	0.101407222797572	0.0507036113987859	0.241860621537037	0.480823653779979	0.0493980937395968	0.0283818013698226	0.163311583984229	0.237124084185101	4	0.119553890819687	0.0982711755597065	0.0491355877798533	0.0509443012559189
A0A0A0MQR2	-0.035522695200725	-0.0112078728277361	-0.121643117227238	0.103257533447624	4	-0.0162790379520188	0.0927121282312802	0.0463560641156401	0.737460303724133	0.844767903811313	0.0549985360965929	0.157427692367212	0.0203089824003394	0.0402927059480332	4	0.0682569792030443	0.0611234089796655	0.0305617044898328	0.0669506283231616	0.252841017727936	-0.0548696639304717	0.174455813341133	-0.102839977163093	0.0205683021221378	4	0.00932861859242652	0.121238792312362	0.0606193961561811	0.882743321628222	0.933629529750174	0.0157805826905786	0.141962151015713	-0.0752192454955923	0.0760289206662845	4	0.0396381022192459	0.0922964322017109	0.0461482161008554	0.423360787575507	0.653278612229839	-0.0274807364221068	0.105256877509565	-0.078973174112093	-0.145791264511787	4	-0.0367470743841054	0.106340124555575	0.0531700622777876	0.515322977769699
A0A0A0MRG8	0.177552391528633	0.0547693578518605	-0.0867247010240099	0.309265458795854	4	0.113715626788084	0.169278721802957	0.0846393609014784	0.22768106803455	0.413381302503571	0.142590935520508	0.163322266618065	0.00157241981875358	0.398440988748149	4	0.176481652676369	0.164500189218771	0.0822500946093857	0.0755564379379051	0.2728097402851	0.0217694740245553	-0.0402951107904743	-0.0683371297631535	0.166138614155584	4	0.0198189619066278	0.104560099729774	0.0522800498648871	0.717672514060499	0.836677791028595	-0.0803098473343422	0.0518175279777043	0.0286447869468938	0.134092895587283	4	0.0335613407943847	0.0883755280363915	0.0441877640181958	0.476314628732424	0.693097511140491	0.0932402670194355	0.190254530517402	-0.0087595596416406	0.348023348151174	4	0.155689646511593	0.15180080192597	0.0759004009629849	0.0860945676855305
A0A0A0MRM9	0.36736060379349	0.390958145864392	0.295401191445838	0.319785654865221	4	0.343376398992236	0.0435790793192508	0.0217895396596254	4.13947460652762e-06	0.0003293060983035	0.233950322126411	0.196756494349599	0.248010315121852	0.191072658123642	4	0.217447447430376	0.0278698092633423	0.0139349046316712	4.38574249724045e-06	0.000662904978457895	0.330873528554334	0.350994963190984	0.365419566862279	0.258093664563523	4	0.32634543079278	0.0476556915795625	0.0238278457897812	9.41540189596813e-06	0.000674329123344805	0.399390892520252	0.477347401074191	0.428953508119148	0.301802990292054	4	0.401873698001411	0.0740493232830649	0.0370246616415325	3.62283726742569e-05	0.0019604481507924	0.424949382699383	0.427946088236732	0.462286870887136	0.356800227180964	4	0.417995642251054	0.0441737389604238	0.0220868694802119	1.40648279296001e-06
A0A0A0MS54	-0.0466310853338031	-0.157111938953453	0.152593635835976	0.209935458499389	4	0.0396965175120273	0.171185162814794	0.0855925814073969	0.659150646391691	0.792921768421043	-0.262805606366041	-0.167456745851563	0.142215651099256	0.146334343358358	4	-0.0354280894399976	0.211129487792721	0.105564743896361	0.748592642716213	0.870382907281197	-0.11730625534714	-0.0934773919055001	0.089575353977179	0.25685583090467	4	0.0339118844073022	0.175021311687721	0.0875106558438604	0.711747095940031	0.83375974813119	-0.123534992845691	-0.171745437066681	0.030534368148112	0.167841686941823	4	-0.0242260937056092	0.154394467365641	0.0771972336828205	0.764281331546327	0.882177344507273	-0.0974432945896742	-0.0345324059594288	0.058194878170015	0.229976117254498	4	0.0390488237188525	0.142436065820435	0.0712180329102177	0.603272712026708
A0A0A0MSA9	0.368406413945041	0.283970168609779	0.144600845082446	-0.146331752159984	4	0.162661418869321	0.225720904238366	0.112860452119183	0.199592447828197	0.380433776661186	0.375604472613529	0.402632478388063	0.291079037013739	0.107476367345303	4	0.294198088840158	0.13324131731309	0.0666206586565448	0.00449014686748965	0.0479603826320447	0.226517051363917	0.443184540233245	0.294631649372852	-0.0253765629007928	4	0.234739169517305	0.195588325481937	0.0977941627409686	0.0532702468041609	0.164353935816029	0.359991050069501	0.190596926266589	0.265282845626811	-0.068750832495644	4	0.186779997366814	0.1839160496166	0.0919580248083002	0.0885234119418887	0.263599023223191	0.525836137682584	0.377356248764418	0.261286743547527	0.0657128406819248	4	0.307547992669113	0.194205433136705	0.0971027165683525	0.0193862931871801
A0A0A0MSJ9	NA	-0.0428056107002176	0.123067683532804	0.0189053652521514	3	0.0330558126949128	0.0838371266626632	0.0484033876467734	0.451477799223828	0.627810029910712	NA	0.19243919923482	0.00471212734932085	-0.00314655531686403	3	0.0646682570890923	0.110722626260025	0.0639257380766076	0.280670007811225	0.540079843165711	NA	0.0888257418154366	-0.0845777707703644	0.00737953036559753	3	0.00387583380355655	0.0867548353780506	0.0500879275590192	0.929902130359112	0.959090460619446	NA	-0.0594244122004331	0.0324214776923775	0.0324214776923773	3	0.00180618106144056	0.0530272492535749	0.0306152966309368	0.946518193643806	0.971933808426562	NA	-0.125406805967602	-0.0282198736474581	0.136229620761301	3	-0.00579901961791954	0.13225137416839	0.0763553664768181	0.931195800807985
A0A0A0MSK5	-0.109304890534002	-0.0492090612522922	-0.0572334043146108	-0.0361294767807219	4	-0.0629692082204068	0.032091575894881	0.0160457879474405	0.00776307430313734	0.0455684924628819	-0.0512391076144912	-0.0988300266594247	-0.00630687361083238	0.0630366616043228	4	-0.0233348365701064	0.068867407115845	0.0344337035579225	0.523236267607953	0.73913235372843	-0.0694424650177443	-0.0222470875747314	-0.00686182050225903	0.0437213774293178	4	-0.0137074989163542	0.0466342155219859	0.0233171077609929	0.578056679745439	0.738942774022014	-0.0893712187884404	-0.0518611181239644	0.015347964333436	-0.0315700790008699	4	-0.0393636128949597	0.0436311973153909	0.0218155986576954	0.12121502073931	0.316436103363501	-0.124579424527188	-0.028951373696129	0.071553261025034	0	4	-0.0204943842995708	0.0812362912875376	0.0406181456437688	0.63185656266313
A0A0A0MT32	0.0826121051113917	0.0559631477759052	0.198355810837042	0.115385725201819	4	0.113079197231539	0.0618274688332401	0.03091373441662	0.01060601898902	0.0557599920066219	-0.178819042988188	-0.0953069600957274	0.233363539157451	0.107476367345303	4	0.0166784758547097	0.187933225283511	0.0939666126417557	0.864961157267119	0.934627924538093	-0.00299417964455373	-0.110060276101104	0.111918422859969	0.126024026864217	4	0.0312219984946318	0.110500023302766	0.055250011651383	0.592488498124953	0.75035304978288	-0.0521962111254285	-0.0518611181239644	-0.00193002709839957	0.119794512534714	4	0.00345178904673049	0.0810777628298002	0.0405388814149001	0.934914168982661	0.967576102231252	0.0694916642468265	0.0430285773342239	0.0396227721335932	0.0536175156499098	4	0.0514401323411383	0.0134288627233112	0.00671443136165562	0.000258493232001543
A0A0A0MT60	0.0620751741086972	-0.0856032985126916	0.0436332160383993	0.0282659498558595	4	0.0120927603725661	0.0665811134538728	0.0332905567269364	0.728873586046138	0.840665719426736	0.152918073682403	-0.0132358271566941	-0.00157413549811045	0.0479139336073013	4	0.046505511158725	0.07573263726869	0.037866318634345	0.265378457068924	0.524716496640392	0.0747979809615974	0.0175539204832436	0.0668808067063838	0.0735566069700811	4	0.0581973287803264	0.0273177506775937	0.0136588753387969	0.00531673857175468	0.0371702038161452	0.084156379144328	0.070995629661569	0.0879165902840811	0.0760289206662845	4	0.0797743799390657	0.00767229709053089	0.00383614854526544	8.04978880736316e-07	0.000152090697279118	0.130060540564373	0.0135847994417419	0.0831412353002459	0.0723889055377464	4	0.0747938702110268	0.0478762904278558	0.0239381452139279	0.0204682707449496
A0A0A0MTB8	-0.0522175203523823	0.0831511592216829	-0.00295634333141221	-0.208190222567025	4	-0.0450532317572842	0.122302246753633	0.0611511233768165	0.489067612220268	0.661499504135065	0.114332675478995	0.317970081318679	-0.189726232416126	0.0494333598045021	4	0.0730024710465126	0.209204198897301	0.10460209944865	0.511361928438459	0.729861713724958	0.304474712509766	0.0731724775039512	-0.229540860502784	-0.166046041822573	4	-0.00448492807791007	0.243747750996679	0.12187387549834	0.971838474986427	0.984540117253341	0.111528489525191	0.18420624010956	-0.00193002709839957	-0.110282055014911	4	0.0458806618803603	0.129249447446484	0.0646247237232419	0.504375542528921	0.711824120011639	-0.00629540653147875	-0.138869065774164	-0.105035470698289	-0.0426443374084937	4	-0.0732110701031065	0.0598213898413115	0.0299106949206558	0.0499495426660452
A0A0A0MTH3	-0.0522175203523823	-0.00124102806868964	0.0450651715315313	-0.0167478917062867	4	-0.00628531714895682	0.0403383617975854	0.0201691808987927	0.765866182176294	0.8629196678043	-0.137961231571315	0.0180032346998905	0.0988012907196386	0.0326310042399664	4	0.00286857452204514	0.100251318333401	0.0501256591667003	0.956222068138568	0.975256178131879	-0.0424947914234362	0.00110339970264944	0.0487955038348441	-0.0133790298011999	4	-0.00149372942178562	0.0381142996420014	0.0190571498210007	0.940073180155516	0.964971553008532	-0.0751573595687394	-0.0518611181239644	-0.0174639057414858	-0.00782799012702305	4	-0.0380775933903031	0.0311172901026627	0.0155586450513313	0.0499696299401349	0.183100837950337	-0.0996852453763438	-0.0345324059594288	0.00348898607987985	0.0139391909578738	4	-0.0291973685745047	0.0514009207077475	0.0257004603538737	0.299261075660071
A0A0A0MTH9	NA	NA	NA	NA	0	NA	NA	NA	NA	NA	NA	NA	NA	NA	0	NA	NA	NA	NA	NA	NA	NA	NA	NA	0	NA	NA	NA	NA	NA	NA	NA	NA	NA	0	NA	NA	NA	NA	NA	NA	NA	NA	NA	0	NA	NA	NA	NA
A0A0A0MTL6	-0.174825522252106	0.232106386816872	0.02198155841849	-0.115080818175544	4	-0.00895459879807181	0.180594741798523	0.0902973708992614	0.924235240354403	0.958077381750242	0.11855417092968	0.325875279404025	-0.140338205453962	-0.164630701772799	4	0.0348651357767358	0.232512048631748	0.116256024315874	0.774372169002664	0.887507550112607	0.0412788320503753	0.271838064218025	0.0879661011155219	-0.289013472414627	4	0.0280173812423239	0.23361421382924	0.11680710691462	0.818422967502379	0.892207944738439	0.125022228184118	0.37865156166413	-0.0936238258770136	-0.339996387648678	4	0.0175133940806391	0.306672274145061	0.153336137072531	0.912792936519916	0.961023539462051	0.228064690573489	0.144064897497334	-0.129665137207004	-0.204297600887263	4	0.00954171249413911	0.208929476301788	0.104464738150894	0.930196293477462
A0A0A0MTS2	0.217564443331995	0.180499273534833	0.288163575726843	0.304458073338241	4	0.247671341482978	0.0585458964618511	0.0292729482309256	0.000148934593919508	0.00323905954977462	0.0994593989974648	0.0437951178796848	0.28721639738134	0.264866732177575	4	0.173834411609016	0.120532455519062	0.0602662277595309	0.0278953512000286	0.152215968732286	0.197248964424139	0.165625962338379	0.304365532357335	0.322224001983239	4	0.247366115275773	0.0775581892552505	0.0387790946276252	0.000697858731154452	0.0105492297444039	0.164762324160391	0.138660787925462	0.257236561295681	0.251538766995964	4	0.203049610094375	0.0602750935351418	0.0301375467675709	0.000520701873902933	0.00965694334238385	0.206450877467427	0.130413487724807	0.270003960648636	0.281590224862038	4	0.222114637675727	0.0694866582209473	0.0347433291104736	0.000689666496168493
A0A0A6YYL4	-0.106396230192117	-0.106819784422387	-0.0664814811166264	-0.0119429079444338	4	-0.0729101009188911	0.0448312140543366	0.0224156070271683	0.0174084261538929	0.0791875252618553	-0.0787654390634148	-0.132735366673197	-0.140338205453962	-0.0774787526777174	4	-0.107329440967073	0.0338723357625682	0.0169361678812841	0.000722549310166219	0.0163004967509887	-0.0715363623967605	-0.0782478265811685	-0.0882117652381037	-0.0979511648349222	4	-0.0839867797627387	0.011558590296378	0.00577929514818902	6.65792875978524e-06	0.000529655753706073	-0.0471429833991431	-0.0785079581897067	-0.106025292276767	-0.0802595719154592	4	-0.077983951445269	0.0241034930887826	0.0120517465443913	0.000646614122940917	0.0112995015264337	-0.0929698180103663	-0.0713450715771558	-0.067946151963069	-0.0440877542781624	4	-0.0690871989571884	0.0200145922109319	0.0100072961054659	0.000456499231561875
A0A0B4J1V8	0.120348215684038	0.215108310464975	-0.00443678988604308	-0.227555547433956	4	0.0258660472072534	0.191381191107675	0.0956905955538373	0.795979764083947	0.885300524954294	0.049481531129027	0.0893990850531069	0.43068510430932	-0.218468853400349	4	0.0877742167727762	0.266359196569158	0.133179598284579	0.534314269209583	0.74952762683089	0.0814093609680632	0.15674173626908	0.193500515287879	-0.141355849245541	4	0.0725739408198702	0.150057182356119	0.0750285911780597	0.370757963883146	0.571545805618945	0.0515517137124006	0.226803939423594	0.105950513114343	-0.0736719118806994	4	0.0776585635924094	0.124669239666609	0.0623346198333046	0.25926590143618	0.500485836552727	-0.117747391044763	0.263716692458423	0.32820220739378	-0.188249659655393	4	0.0714804622880118	0.262124486533879	0.131062243266939	0.60514923068809
A0A0C4DFL7	0.152272983080275	0.131514180783082	0.11899418894638	0.145805121079673	4	0.137146618472352	0.0148886044305897	0.00744430221529486	1.64875325070982e-06	0.0001916992721883	0.0406102039234796	0.372417865341055	0.13507004441173	0.130629442652483	4	0.169681889082187	0.141991137449938	0.070995568724969	0.0540236710523423	0.222498034865437	0.112175590775628	0.39447089534303	0.206907173839029	0.0508811690021841	4	0.191108707239968	0.149999967168829	0.0749999835844145	0.0436011447878312	0.143267674666972	0.189590461004326	0.55121729770055	0.273284502527551	0.151065974190996	4	0.291289558855856	0.180639578234652	0.0903197891173261	0.0180213805423094	0.0949281070148053	-0.0620379584584754	0.377356248764418	-0.194142944532274	-0.250205407343856	4	-0.032257515392547	0.284240793664933	0.142120396832467	0.827980300975289
A0A0C4DFM1	0.0736631483839089	0.0535745792818031	-0.049571702606544	0.0719176966257098	4	0.0373959304212195	0.0586861179327119	0.029343058966356	0.249639219125514	0.436724166328952	0.32991456469855	0.0940354951738257	-0.0110551885089958	0.017184442968845	4	0.107519828583056	0.154770542494171	0.0773852712470855	0.214075352852123	0.473272979648036	0.115860637583484	0.0679167520524561	-0.0629639576643018	-0.00148044655463087	4	0.0298332463542518	0.0784069169678827	0.0392034584839413	0.475499942014946	0.663636345665366	0.135060347821606	0.0553234714792398	0	0.0400346618022525	4	0.0576046202757746	0.0566615362992201	0.02833076814961	0.0882609218048822	0.26312896115992	0.0932402670194355	0.0430285773342239	-0.00174766228626722	0.0208586048976642	4	0.0388449467412641	0.0406104339371055	0.0203052169685528	0.104265686094916
A0A0C4DFP4	0.0464783190576787	NA	-0.0851574058770496	-0.0119429079444338	3	-0.0168739982546016	0.0659562564015585	0.0380798623881798	0.619032082745518	0.765998356995375	0.0383838222456964	NA	0.0109711178210032	-0.031778708672661	3	0.00585874379801286	0.035359545561709	0.0204148431484755	0.745540348717082	0.869391204281648	0.168262335543303	NA	0.135479562318154	0.0278436329253132	3	0.110528510262257	0.0734593034288506	0.0424117486091293	0.0264050952379338	0.102336670390095	0.163673086629685	NA	0.116663644329636	-0.067114195858537	3	0.0710741783669283	0.121961026539827	0.0704142315034121	0.281614316674016	0.524534860939958	0.0228509391280375	NA	0.0598714559773987	0.0468538134306089	3	0.043192069512015	0.0187799345936688	0.0108426002930182	0.0050538009163282
A0A0C4DFX9	0.792822245539746	-0.667935543189176	-0.121643117227238	0.204784810254926	4	0.0520070988445644	0.611179165230921	0.305589582615461	0.870457311934572	0.929799462816669	-0.149336021435972	0.190997225060914	0.0525236072655089	0.477321777533186	4	0.142876647105909	0.263135611902564	0.131567805951282	0.319190860786128	0.573329751726955	0.510979410836384	-0.292698964971008	-0.0103050083917385	0.686371228331125	4	0.22358666645119	0.453879686338977	0.226939843169488	0.362560597912505	0.563506780200259	0.161492141330159	0.0162813707509418	0.0455625773804438	0.915607812709628	4	0.284735975542793	0.425229391749976	0.212614695874988	0.229001626215487	0.469655302611545	0.231635719725686	0.0403765636446262	0.180366748163959	0.357893592175235	4	0.202568155927377	0.131364543065785	0.0656822715328927	0.021550801890638
A0A0C4DG89	-0.427235087548773	NA	-0.0835918115390472	0.0305966370200913	3	-0.160076754022576	0.238306382259176	0.137586253946941	0.223063031190271	0.40792085555935	-0.137961231571315	NA	-0.0158191830665319	-0.236870825352139	3	-0.130217079996662	0.110729111131623	0.0639294821189707	0.0590490852583673	0.237097354569041	-0.283316206786069	NA	0.103978419104153	-0.121903486579369	3	-0.100413758087095	0.194539554162811	0.112317463963929	0.334121031062243	0.535504009731763	0.0289998717225524	NA	-0.02529402016391	0.389042290745899	3	0.130916047434847	0.225186200262032	0.130011313339073	0.282633572384751	0.524991746242652	-0.0296164807660979	NA	-0.00174766228626722	0.0509158387538441	3	0.00651723190049299	0.0408973712939385	0.0236121083257035	0.754850096463256
A0A0C4DGB5	0.0965635504939877	0.098294645482225	0.0306812533688753	0.17137793316958	4	0.0992293456286671	0.0574811266552468	0.0287405633276234	0.0135898792067295	0.0668003330763307	0.0483755939028579	-0.0232430005120753	0.0870000384872877	0.216994117410617	4	0.0822816873221718	0.100755123230411	0.0503775616152056	0.153524963770601	0.397011091085138	0.096408274917311	0.122676520731049	0.338602901817094	0.421680772909458	4	0.244842117593728	0.160229037506271	0.0801145187531354	0.022334947488292	0.0931988765947023	0.0737564499530702	0.169722844216326	0.191197799732854	0.271078953391609	4	0.176439011823465	0.0811651727039185	0.0405825863519593	0.00483489318959078	0.0417709042614145	0.139595902711175	0.168559459418083	0.213883874316735	0.30672094018572	4	0.207190044157928	0.0730581883650652	0.0365290941825326	0.00129283587395772
A0A0C4DGQ8	0.0698108228883025	NA	0.314525846524758	-0.736569194921814	3	-0.117410841836251	0.549990145679964	0.317536958659969	0.676991520051876	0.803827716071022	0.049481531129027	NA	0.664041064037787	-0.0675632838126346	3	0.215319770451393	0.392985968788412	0.226890554867736	0.308114228964495	0.567598607044283	-0.420698398797074	NA	0.327735091171944	-0.419483404310036	3	-0.170815570645056	0.431757965591287	0.249275577658895	0.450030294166798	0.639559449935677	0.263644553883019	NA	0.158737927473778	0.0715784440031346	3	0.164653641786644	0.0961696126537461	0.0555235517535023	0.016484950028791	0.0896295034838761	-0.192345980804207	NA	0.221394016424014	-0.386376802614204	3	-0.119109588998132	0.310433598265678	0.179228921524193	0.46303163454857
A0A0C4DGV9	NA	NA	NA	NA	0	NA	NA	NA	NA	NA	NA	NA	NA	NA	0	NA	NA	NA	NA	NA	NA	NA	NA	NA	0	NA	NA	NA	NA	NA	NA	NA	NA	NA	0	NA	NA	NA	NA	NA	NA	NA	NA	NA	0	NA	NA	NA	NA
A0A0C4DGX4	0.111630998582929	-0.0174722988271051	0.0536271850349553	0.105470256336736	4	0.063314035281879	0.0598106533507641	0.029905326675382	0.0785924390209942	0.210954439784998	-0.0715338698323389	0.0596839903830486	-0.0825547088683296	0.0705389928161536	4	-0.00596639887536656	0.0823162823968745	0.0411581411984372	0.889487256587768	0.945803720247915	-0.0414683274591894	-0.00442205722729871	-0.00514330327595963	-0.0118863291601319	4	-0.0157300042806449	0.0174850700427454	0.0087425350213727	0.122079189341582	0.278999134297091	0.099047369250809	0.0447799772377702	-0.0998112336779845	0.128390536223099	4	0.0431016622584235	0.101375583383674	0.050687791691837	0.427761428356392	0.654414371417698	0.0971606363907784	0.0297194881053339	0.0190858411308984	0.0630337404860435	4	0.0522499265282636	0.0353116586960745	0.0176558293480372	0.0253039780127138
A0A0D9SF70	0.0174386461063248	0.245771360040762	-0.0253241563598667	-0.163546307512183	4	0.0185848855687592	0.170014493013685	0.0850072465068423	0.834187320794863	0.909065706835931	0.14569684638833	0.366042711171827	-0.0447383147652844	-0.152352371994363	4	0.0786622177001276	0.227798611011176	0.113899305505588	0.51561220305063	0.73339920223934	0.0936078307363558	0.269092687479208	-0.117618032534372	-0.164386817900882	4	0.0201739169450773	0.200335036216131	0.100167518108066	0.84703881016403	0.909911241436479	0.0597722205173689	0.229909850291415	-0.148150767949443	-0.175792008474309	4	-0.00856517640374201	0.190603680365596	0.0953018401827978	0.931312252832068	0.966812136095928	0.208264447839358	0.232689796837798	-0.255369743782721	-0.112096218160639	4	0.0183720706834491	0.240795735030771	0.120397867515386	0.883720152974847
A0A0D9SGC1	-0.0592311221134365	0.00495346423412973	0.0734097972254929	0.0189053652521514	4	0.00950937614958441	0.0545208243387293	0.0272604121693646	0.73912860252041	0.845943360870717	-0.097004557348457	-0.0571106365347774	0.00157241981875358	-0.015801856122893	4	-0.0420861575468434	0.0441161402231339	0.022058070111567	0.105002908195038	0.328899207108753	-0.11083192118659	-0.0643310462459837	0.0237625731704176	-0.00741747156248301	4	-0.0397044664561597	0.0598222322296089	0.0299111161148045	0.232642551975433	0.425455798319257	-0.0308411710700424	-0.0294062672962684	0.015347964333436	0.0626360907393851	4	0.00443415417662756	0.0443324537576243	0.0221662268788122	0.848056329503158	0.929696180738169	-0.0598537111965994	-0.0247797224784713	0.0156344159419692	0.0263703405066867	4	-0.0106571693066037	0.0395054012335977	0.0197527006167989	0.608945045362961
A0A0D9SGG1	-0.106396230192117	-0.121589243752728	0.0146915224880124	0.00593458278582204	4	-0.0518398421677525	0.0721241641370439	0.0360620820685219	0.200607489496947	0.382127561908803	-0.0921182019884312	-0.143610003897195	0.0600888843856941	0.0898644085545772	4	-0.0214437282363387	0.113954008830784	0.056977004415392	0.719600512307034	0.853256099700316	-0.105458749087738	-0.129248522927322	0.187501774666436	0.17795866695441	4	0.0326882924014464	0.173569230419074	0.086784615209537	0.719387203096778	0.837069867190747	-0.101105811606375	-0.169697608417823	0.0897301606560122	0.118356849196123	4	-0.0156791025430156	0.141534650527803	0.0707673252639017	0.832005686275363	0.924348838519082	-0.0576727658970735	-0.167708748654146	0.0514690149817016	0.116984848412734	4	-0.014231912789196	0.125135522795805	0.0625677613979024	0.827615684495874
A0A0G2JH37	0.107878863721822	0.249950059677276	0.223868324320296	0.0200787651060919	4	0.150444003206371	0.106613746158291	0.0533068730791453	0.0302654627516251	0.115520825628993	0.185476748373685	0.299354403151332	0.189889212651887	-0.0446888175600479	4	0.157507886654214	0.144723585887866	0.0723617929439329	0.072392759314153	0.266882087081322	0.189401102601453	0.304381437482347	0.256459147064702	-0.0178664207935137	4	0.183093816588747	0.142030463356113	0.0710152316780565	0.0418687992081601	0.139547276743404	0.117166226441209	0.0933367974159712	0.199619861250827	-0.0188590272513159	4	0.0978159644641727	0.0901324630174624	0.0450662315087312	0.0730122293092913	0.231844505464273	0.167829583440119	0.096347395919867	0.204819791888498	-0.0112491411329594	4	0.114436907528881	0.0951210752753311	0.0475605376376655	0.052851580039642
A0A0G2JHC2	0.0240900873068186	0.210827313137099	0.00147590298384849	0.119770819887541	4	0.0890410308288268	0.0960251619333351	0.0480125809666676	0.113077046133843	0.266017050943662	0.0637820946798321	0.109383459507262	-0.0447383147652844	0.150587992752006	4	0.0697538080434537	0.0841601295911305	0.0420800647955652	0.148464001976322	0.390900889088856	0.0188201816020872	0.304381437482347	0.223125684397158	0.310340120612151	4	0.214166856023436	0.136172135356648	0.0680860676783239	0.0199274280489579	0.0875472247015199	0.0480142496411971	0.274209949314152	0.0641303374197156	0.251538766995964	4	0.159473325842757	0.119936023681368	0.0599680118406838	0.0375587890939506	0.152304920186106	0.0912760801389215	0.0925121387895382	0.0962716562290207	0.155221053945244	4	0.108820232275681	0.031006742276264	0.015503371138132	0.000417256133170006
A0A0G2JIW1	0.0187713898878366	0.0245989768665701	0.0450651715315313	-0.00715387436548881	4	0.0203204159801123	0.0215084876454819	0.010754243822741	0.107722979825223	0.258244701040166	-0.072736616913996	0.00164597284355963	0.0372729891334822	0.00627259701553003	4	-0.00688626448035603	0.0466628449803675	0.0233314224901837	0.777826308504453	0.889897908598906	-0.0466079661009066	0.0109962044610812	0.0685137384493494	-0.0193653248669311	4	0.00338416298564822	0.0493847376681874	0.0246923688340937	0.895472211195352	0.939608640903696	-0.00856927872517024	-0.0349872995595682	0.0399453280741899	0.0155296982936044	4	0.00297961202076395	0.0321394465893474	0.0160697232946737	0.859010613296588	0.93645477244702	-0.048981805633029	-0.0178536648127984	0.0259640188356989	0	4	-0.0102178629025321	0.031487997794082	0.015743998897041	0.540369138018849
A0A0G2JJD3	-0.274143578329059	0.0403662927248865	-0.00591875718727371	0.0235932492823289	4	-0.0540256983772793	0.147987283108089	0.0739936415540445	0.492815454767649	0.663895329662479	-0.162080760155999	0.188108945736087	-0.138605238229507	-0.240579555006098	4	-0.0882891519138791	0.189354328572644	0.0946771642863222	0.387050814473076	0.630101085588179	-0.129251860253048	0.0668633054624664	-0.0558307167248091	-0.171035193910248	4	-0.0723136163564097	0.104290963239063	0.0521454816195313	0.214838621289382	0.408023582817395	0.130607581814975	0.318649655055132	-0.0630786826233803	-0.0605861528610393	4	0.0813981003464219	0.182339374294462	0.0911696871472311	0.406335353627079	0.640017186434417	-0.101930685581988	0.101445263559546	-0.141176062960694	-0.228709266927177	4	-0.0925926879775783	0.139792694403386	0.0698963472016931	0.233483439491219
A0A0G2JLB3	-0.00812025618938593	0.0160369633631459	-0.0358823480584434	0.0317605701537272	4	0.000948732317260944	0.0295285122163308	0.0147642561081654	0.950851613889223	0.972732463210532	0.0725124997843681	0.0325678624564307	-0.0382615584738315	-0.0382193222304902	4	0.00714987038411926	0.0548905248427104	0.0274452624213552	0.803177604436531	0.90263072639041	0.0148783894207126	0.0131854234561115	-0.0137564335806677	-0.0223678130284545	4	-0.00201510843307452	0.0188727116936807	0.00943635584684036	0.837971615335974	0.904861939938319	0.037349514942978	-0.0462145549828223	-0.0671141958585371	-0.0460051692644388	4	-0.0304961012907051	0.0463015963288237	0.0231507981644118	0.235811889549947	0.476014116966972	0.0433150416877531	0.012232061376493	0.00696955481484174	-0.0498759066395696	4	0.00316018780987957	0.0388246046186839	0.0194123023093419	0.876025864467371
A0A0G2JMH6	0.0826121051113917	-0.0250256932587402	0.151264575363456	0.0639751950188969	4	0.0682065455587512	0.0726092536420734	0.0363046268210367	0.109347569366068	0.260692194159008	0.0811903908563654	0.0180032346998905	0.0929127313571793	0.127755547198372	4	0.0799654760279519	0.0457978969304918	0.0228989484652459	0.0129501687758543	0.091897559177013	-0.0221030025922583	-0.0144215238029256	0.192003166901377	0.183181098144579	4	0.0846649346626931	0.118945995090561	0.0594729975452805	0.204425216178929	0.394889677495479	0.0048739743684712	0.0779067568463652	0.160464672193246	0.23968634490755	4	0.120732937078908	0.101629892195311	0.0508149460976556	0.0550728588856491	0.192914545088432	0.0674948541828797	0.0925121387895382	0.0682252433072796	0.131122730328213	4	0.0898387416519775	0.029877011180296	0.014938505590148	0.000952888177508677
A0A0G2JN29	-0.164200681714979	-0.0569309086300282	-0.0914368283733308	-0.0882807588318287	4	-0.100212294387542	0.0454135163812884	0.0227067581906442	0.00450319806596289	0.0328028138636284	-0.186610394279031	-0.0778195333668864	-0.200532987372709	-0.0841271286870831	4	-0.137272510926427	0.065307485043158	0.032653742521579	0.00566138623693909	0.0545586618647648	-0.185966251247369	-0.0864283793109757	-0.117618032534372	-0.090054620540029	4	-0.120016820908187	0.0461194044756143	0.0230597022378071	0.00200584728011282	0.0193727678203868	-0.0147215057067656	-0.0219983175619992	-0.180572245641821	-0.0654794137675916	4	-0.0706928706695443	0.0766042000051929	0.0383021000025964	0.114475752618531	0.306809783091697	-0.0511496423157392	-0.0499925105048816	-0.131577258150781	-0.104546776334401	4	-0.0843165468264506	0.0405011112812684	0.0202505556406342	0.0059201605834112
A0A0G2JNU6	0.216403320499991	0.280910368860721	NA	-0.158227610093201	3	0.11302869308917	0.237118696719973	0.136900543381169	0.369049911291362	0.552958708447589	0.245577208757248	0.27097260178151	NA	-0.00314655531686403	3	0.171134418407298	0.151464929433832	0.0874483177814105	0.0664598204372903	0.251764457621464	0.284149002388689	0.218761011929063	NA	-0.00593092321778078	3	0.165659697033324	0.152155851161584	0.0878472216269172	0.0739121268937977	0.205364301102896	0.288840706709639	0.246873857024558	NA	-0.227867551402599	3	0.102615670777199	0.28697504111835	0.165685117240384	0.492418938031053	0.70282457491401	0.244065169267204	0.261441147758126	NA	0.133678435231969	3	0.213061584085767	0.0692946202716154	0.0400072676672101	0.00141489212212551
A0A0J9YVP6	-0.039678324692036	-0.00124102806868964	-0.0328578290452742	0.0071185754997018	4	-0.0166646515765745	0.0230606316701055	0.0115303158350528	0.198505760131566	0.378877061970095	-0.09089919469927	-0.0215703104222184	-0.0942636024565909	-0.0189831033675729	4	-0.0564290527364131	0.0417810757773153	0.0208905378886576	0.035520318996818	0.174314812219774	-0.00799832979142667	-0.100561015175221	-0.0346402005204566	-0.0268832941509475	4	-0.0425207099095129	0.0402786252835233	0.0201393126417617	0.0792271706001134	0.215381058205164	0.0145728010872726	-0.0765882040263411	0	0.0308940079457836	4	-0.00778034874832125	0.0475759881588804	0.0237879940794402	0.754724081478318	0.878525567311881	-0.0189692365665893	-0.0387323944887146	-0.0282198736474581	0.0454972594605238	4	-0.0101060613105595	0.0379379418919644	0.0189689709459822	0.613338926101566
A0A0J9YW33	NA	NA	NA	NA	0	NA	NA	NA	NA	NA	NA	NA	NA	NA	0	NA	NA	NA	NA	NA	NA	NA	NA	NA	0	NA	NA	NA	NA	NA	NA	NA	NA	NA	0	NA	NA	NA	NA	NA	NA	NA	NA	NA	0	NA	NA	NA	NA
A0A0J9YWL0	NA	NA	NA	NA	0	NA	NA	NA	NA	NA	NA	NA	NA	NA	0	NA	NA	NA	NA	NA	NA	NA	NA	NA	0	NA	NA	NA	NA	NA	NA	NA	NA	NA	0	NA	NA	NA	NA	NA	NA	NA	NA	NA	0	NA	NA	NA	NA
A0A0R4J2G3	-0.16268921479738	-0.148836418895951	-0.159075545248694	-0.154251415456222	4	-0.156213148599562	0.00601102559250627	0.00300551279625313	3.40392877280148e-09	5.14503834008943e-06	-0.129175762676448	-0.0502732064812237	-0.123101500528658	-0.0221713809986203	4	-0.0811804626712375	0.0532235926467271	0.0266117963233635	0.0224962045493219	0.130780819908847	-0.120554350619833	-0.132874905333272	-0.110210082800103	-0.0389941316158637	4	-0.100658367592268	0.0421405137866793	0.0210702568933397	0.00307141644141291	0.0265282625782606	-0.0764437573721056	-0.175849835399418	-0.126934282039748	-0.0951927188919706	4	-0.11860514842581	0.0434820016624716	0.0217410008312358	0.00157941593892986	0.0197960647008996	-0.159233493554873	-0.175394941799278	-0.078973174112093	-0.094043489915138	4	-0.126911274845346	0.0475175215814695	0.0237587607907348	0.00175850090984316
A0A0U1RQX8	0.117862952294444	0.12811293353174	-0.0328578290452742	0.0594169130565926	4	0.0681337424593756	0.073814583704332	0.036907291852166	0.114410337792745	0.267258904420699	0.110098791175775	0.0453919028140143	-0.116264070475105	0.0357005693147287	4	0.0187317982073533	0.0958653784150039	0.0479326892075019	0.70944851331822	0.849156917647861	0.114019290759316	0.109436021490723	-0.0469634789705867	0.070741591363027	4	0.0618083561606198	0.0750677272100724	0.0375338636050362	0.150711749725561	0.322892713976165	0.14833677624728	0.100141975321086	-0.0410829059680424	-0.0125452533191136	4	0.0487126480703025	0.0901585910570549	0.0450792955285274	0.32138459981805	0.565641639076576	0.158479615257535	0.100172484437833	-0.0956733674945979	0.0777076029567283	4	0.0601715837893746	0.109330846383465	0.0546654231917323	0.31320461059596
A0A140TA84	0.236016429998526	0.0654780712405101	0.0832003004183023	-0.0706866988170904	4	0.0785020257100619	0.125511965245878	0.0627559826229389	0.257534418238278	0.442847864809053	0.0768579700603323	-0.0249176322043295	0.0929127313571793	-0.0110430996117572	4	0.0334524924003562	0.0600180102485028	0.0300090051242514	0.307607677691468	0.567598607044283	0.122286906742916	-0.123224735299552	-0.0137564335806677	-0.090054620540029	4	-0.0261872206693331	0.109078587862645	0.0545392939313223	0.6481218877157	0.789392613442611	0.11491377470983	-0.0146282119249891	0.0696543838913527	0.00933786457933619	4	0.0448194528138824	0.0586599116666757	0.0293299558333378	0.177346673158875	0.404618107893797	0.233417925067696	0.0496373614098738	0.146052383638624	-0.0383227314584003	4	0.0976962346644485	0.117713648080353	0.0588568240401765	0.148004132964691
A0A182DWF2	NA	NA	NA	NA	0	NA	NA	NA	NA	NA	NA	NA	NA	NA	0	NA	NA	NA	NA	NA	NA	NA	NA	NA	0	NA	NA	NA	NA	NA	NA	NA	NA	NA	0	NA	NA	NA	NA	NA	NA	NA	NA	NA	0	NA	NA	NA	NA
A0A1B0GTJ7	-0.00947808691633684	-0.161267568444764	-0.0556978054033856	-0.159555447316149	4	-0.0964997270201587	0.0761762425756424	0.0380881212878212	0.0444636793375065	0.149915625168664	0.0260769267940835	-0.247310053540777	-0.0318137486757932	-0.047934477063702	4	-0.0752453381215473	0.119030323522257	0.0595151617611284	0.25301289086289	0.513327496025849	-0.00900124609242692	-0.172134335780499	0.0102319226109562	-0.0743900253767366	4	-0.0613234211596765	0.0822750917568004	0.0411375458784002	0.186631900621144	0.373959037061317	-0.00611571513908812	-0.217549126679806	-0.0470485728044314	-0.135787051160913	4	-0.10162511644606	0.0943505145472956	0.0471752572736478	0.0746717590059151	0.235383448878917	0.0207884726711451	-0.190891278122446	0.00174554775182933	-0.0513265805082946	4	-0.0549209595519417	0.0956449306383154	0.0478224653191577	0.294505308285124
A0A1B0GTK8	NA	NA	NA	NA	0	NA	NA	NA	NA	NA	NA	NA	NA	NA	0	NA	NA	NA	NA	NA	NA	NA	NA	NA	0	NA	NA	NA	NA	NA	NA	NA	NA	NA	0	NA	NA	NA	NA	NA	NA	NA	NA	NA	0	NA	NA	NA	NA
A0A1B0GU58	-0.116602301342579	NA	0.0522037068327528	0.138260191454406	3	0.0246205323148599	0.129650862689134	0.0748539604742388	0.710427759011626	0.828558300729994	0.0428331551196613	NA	0.21856653722937	0.113299564114566	3	0.124899752154533	0.0884391240845996	0.0510603520971383	0.032873244755894	0.167581482119844	-0.00199542914368345	NA	0.126101230002293	0.185785241524737	3	0.103297014127782	0.095944876181112	0.0553938000905303	0.076276743823586	0.208862859219837	-0.116901900513244	NA	0.184424571137427	0.289080729356943	3	0.118867799993709	0.210781264872309	0.121694620014158	0.295663075874444	0.538427396607496	0.268607353529996	NA	0.161751069996612	0.0304903672217217	3	0.153616263582777	0.119266743473093	0.0688586864495605	0.0445390810930869
A0A1B0GVD5	-0.458419792734299	-0.493637410053773	-0.375708697296457	-0.425781657639652	4	-0.438386889431045	0.0501377598276824	0.0250688799138412	2.24290876702119e-06	0.000226010440090169	-0.484969264514681	-0.57021591535197	-0.331002919268117	-0.356521034711903	4	-0.435677283461668	0.112179583856278	0.0560897919281392	0.000239555558454296	0.00819970014489181	-0.486224667666665	-0.503420485366095	-0.333526420300621	-0.384293975847736	4	-0.426866387295279	0.0814630694141153	0.0407315347070577	4.43056048319709e-05	0.00173942653775387	-0.475695289152468	-0.592258066411676	-0.35706990100762	-0.431788863568168	4	-0.464203030034983	0.0984180706374456	0.0492090353187228	8.07007903831445e-05	0.00290426773009817	-0.471258131142005	-0.472112473889361	-0.368069876532083	-0.375433424927623	4	-0.421718476622768	0.0577760349179001	0.0288880174589501	6.48351652888762e-06
A0A1B0GVH5	0.249702177284468	NA	0.412081155947432	0.00356367832307508	3	0.221782337184992	0.205684881516671	0.118752221711886	0.0759533357198936	0.206802338515182	0.0736000950419736	NA	0.296213188485175	0.294640768666421	3	0.221484684064523	0.128074224099925	0.0739436877603444	0.0158734043721127	0.103639959863707	0.229071248031474	NA	0.122961522471726	0.167456745851563	3	0.173163172118254	0.0532845281497752	0.0307638366709149	0.00109975828334542	0.0134206940572971	0.112657800769462	NA	0.32654965262774	-0.127235188296108	3	0.103990755033698	0.227016538438083	0.131068059577724	0.386519552630449	0.62052501731378	0.309732086916199	NA	0.278668821775763	-0.164507570781546	3	0.141297779303472	0.265290248060048	0.153165396130851	0.320414228181191
A0A1B0GVU9	NA	NA	NA	NA	0	NA	NA	NA	NA	NA	NA	NA	NA	NA	0	NA	NA	NA	NA	NA	NA	NA	NA	NA	0	NA	NA	NA	NA	NA	NA	NA	NA	NA	0	NA	NA	NA	NA	NA	NA	NA	NA	NA	0	NA	NA	NA	NA
A0A1B0GW05	NA	NA	NA	NA	0	NA	NA	NA	NA	NA	NA	NA	NA	NA	0	NA	NA	NA	NA	NA	NA	NA	NA	NA	0	NA	NA	NA	NA	NA	NA	NA	NA	NA	0	NA	NA	NA	NA	NA	NA	NA	NA	NA	0	NA	NA	NA	NA
A0A1B0GW68	-0.592404320480974	-0.636740921585582	-0.7058025591796	-0.633339037813158	4	-0.642071709764828	0.0470217949020438	0.0235108974510219	1.59324356706956e-07	6.94162791128903e-05	-0.543796237804133	-0.708697869143401	-0.530165141935526	-0.594422829970223	4	-0.594270519713321	0.0811393741046642	0.0405696870523321	6.35560164713079e-06	0.000835347120838104	-0.584464074376282	-0.600499366706335	-0.674994701583629	-0.524116945500629	4	-0.596018772041719	0.0620769868084298	0.0310384934042149	1.29045666191237e-06	0.000156042019558444	-0.539902778102505	-0.679892340737007	-0.631015081051864	-0.599083608965809	4	-0.612473452214296	0.0586938076598848	0.0293469038299424	7.88050841333363e-07	0.000152090697279118	-0.700439718141092	-0.557919627559632	-0.712718047919529	-0.753400052251851	4	-0.681119361468026	0.0851947296153954	0.0425973648076977	3.80021817706967e-06
A0A1P0AYU5	-0.0550188708265221	0.0439805619410053	0.0146915224880124	-0.0459187936681482	4	-0.0105663950164132	0.0477463702147586	0.0238731851073793	0.673560892873236	0.801830202208103	0.0159289714180005	0.116996643617137	-0.0431163977412943	-0.00946032924906628	4	0.0200872220111941	0.0689842551584273	0.0344921275792136	0.581524700231308	0.781513957970871	-0.00499375729090223	0.0530980373409108	-0.0311385118089041	-0.0208657878632226	4	-0.000975004905529544	0.0376188102944092	0.0188094051472046	0.960342022703013	0.977479439269767	0.00608989946437438	0.0623099017953466	-0.00773564877960531	-0.00469169532472198	4	0.0139931142888484	0.0327527811251211	0.0163763905625605	0.425641130945032	0.653668575638519	-0.0642255176962394	-0.0192362188629174	-0.0122783297784367	-0.0732635724668858	4	-0.0422509097011198	0.0309445751301795	0.0154722875650897	0.0341521374892429
A0A1W2PNP0	0.0542978235169779	0.0619173247824636	-0.258022483822702	-0.175585557135098	4	-0.0793482231645895	0.162278912885467	0.0811394564427336	0.365878823305704	0.550274469081166	0.113275368695953	0.206780222301841	-0.195119491186344	-0.152352371994363	4	-0.00685406804572826	0.197217576622392	0.0986087883111962	0.946844194724616	0.970274576492378	-0.0445499129118255	-0.00442205722729871	-0.30576089191791	-0.267480310864986	4	-0.155553293230505	0.153027645561204	0.0765138227806018	0.0882950668407504	0.228882228510759	-0.0433646441617073	0.101838265981984	-0.163190167413584	-0.167000420994432	4	-0.0679292416469349	0.126904384809154	0.0634521924045769	0.325531421677118	0.569491601695561	-0.0818464395386557	-0.0457596613826829	-0.339058789873014	-0.246877389626101	4	-0.178385570105114	0.138343110040288	0.0691715550201441	0.0418320459401561
A0A1W2PNW1	-0.119531632381251	0.0475857992379669	-0.177327249804917	0.073048778644359	4	-0.0440560760759603	0.123247103626288	0.0616235518131442	0.501513852224797	0.671790599017186	0.0670621909186079	0.0893990850531069	-0.0909084961982105	0.129193210536964	4	0.0486864975776171	0.0965457991551221	0.0482728995775611	0.352110323446234	0.599678595931248	-0.11083192118659	-0.0222470875747314	-0.15714639672101	0.109660580655329	4	-0.0451412062067503	0.117399839040673	0.0586999195203365	0.471061299850269	0.660530775331034	-0.03458681153205	-0.0331245555423786	-0.158877174542502	0.00311934184417884	4	-0.0558672999431879	0.0708532515937333	0.0354266257968667	0.165872191256447	0.389915734189922	-0.00209541800219337	0.0257027011739413	-0.116350783926123	0.0961701314937882	4	0.000856657684853213	0.0884086784700097	0.0442043392350049	0.985166749007969
A0A1W2PNX8	0.0749449743597389	0.0331104767220874	0.0335695326937018	0.034085623099971	4	0.0439276517188748	0.0206820512828036	0.0103410256414018	0.00539259559140107	0.0367299804591699	0.138439292250041	0.0893990850531069	0.0433925955133805	-0.177014426228632	4	0.0235541366469742	0.139230587004349	0.0696152935021747	0.746627161108453	0.869435249626677	0.0700569479703587	0.0888257418154366	0.0471400876567823	-0.101121924442866	4	0.0262252132499279	0.0865924796489956	0.0432962398244978	0.566895002624461	0.729383233394066	0.0887546142429753	0.0640512357917718	0.0436925900273976	-0.0460051692644388	4	0.0376233176994265	0.0587179820253174	0.0293589910126587	0.247314414668985	0.485978980962224	0.0674948541828797	0.0337251224441324	0.0648895307440232	-0.131911675505581	4	0.00854945796636356	0.0948892470793095	0.0474446235396547	0.862928725531374
A0A1W2PNZ9	-0.63787984890239	-0.254376972836245	0.0984523842785562	-0.441847469999287	4	-0.308912976864842	0.313481257046297	0.156740628523148	0.0962361611000438	0.240829399838934	-0.204955537535663	-0.661044893551985	0.00784501683428361	-0.268703155920486	4	-0.281714642543463	0.279163927143702	0.139581963571851	0.0901156259637289	0.302463346179152	-0.44764026561696	-0.636081435540289	0.218720505277156	-0.632342201757684	4	-0.374335849409444	0.405038025778941	0.202519012889471	0.114042973055495	0.267237553517691	-0.49965518809665	-0.385624349448296	-0.158877174542502	-0.68433089558432	4	-0.432121901917942	0.219844509182019	0.109922254591009	0.00770247062007688	0.0559725208761837	0.244065169267204	-0.113544909414298	-0.240849326044009	-0.343092704885404	4	-0.113355442769127	0.25611418656739	0.128057093283695	0.4101205511184
A0A1W2PPS1	0.144968182457042	-0.427079058949131	-0.0680286073141049	-0.0984316892999947	4	-0.112142793276547	0.236237846991724	0.118118923495862	0.379070802899605	0.562834497625494	0.109038375809482	-0.344334507935642	-0.284271868923126	-0.350497247084133	4	-0.217516312033355	0.219743071507527	0.109871535753764	0.0950590924799317	0.311549595001804	0.38837140893666	0.172498289240416	-0.227535724612408	-0.094787358652751	4	0.0596366537279795	0.275147862390444	0.137573931195222	0.679811635970986	0.812602046476984	0.32436714033878	-0.0651230175328868	-0.158877174542502	-0.086877450679967	4	0.00337237439585605	0.217714802386931	0.108857401193466	0.976290498033187	0.988412696674786	0.0754655652914594	-0.125406805967602	0.0242475462466773	-0.22379377651306	4	-0.0623718677356313	0.1372740772972	0.0686370386486002	0.398527328785562
A0A1W2PPT5	-0.00270167689606567	0.094814076747263	-0.147579906410865	-0.0410158321407476	4	-0.0241208346751037	0.100219553661331	0.0501097768306657	0.647312743583677	0.783436236772753	0.298630410707871	0.216734786474522	-0.112857469031855	-0.0975165059142624	4	0.0762478055590688	0.212246284380054	0.106123142190027	0.499468799675973	0.719339771996411	0.0738510199555675	0.0804984745928253	-0.223533794054911	-0.110676231156115	4	-0.0449651326656583	0.148394867572067	0.0741974337860333	0.566705765386446	0.729383233394066	0.0337770119844244	0.133694535032112	-0.122728171069536	-0.063846482024626	4	-0.00477577651940649	0.112638744535483	0.0563193722677417	0.935180576214799	0.967576102231252	0.00626805493243332	0.0848109014227438	-0.120142363088497	-0.0527787145422069	4	-0.0204605303188818	0.0871348082499582	0.0435674041249791	0.655201630062232
A0A1W2PPZ5	-0.149156801490529	-0.213529490861038	-0.134553226114625	-0.234535217752402	4	-0.182943684054649	0.0485810929626297	0.0242905464813148	0.000283955605352166	0.00510951068440236	-0.0751451233847177	-0.169307541539504	-0.0925850740055942	-0.15584981623059	4	-0.123221888790101	0.0463265900262647	0.0231632950131323	0.00179568700312609	0.0287088814035422	0.0566985651153397	-0.0459817363670918	-0.0755326311673575	-0.203040249304774	4	-0.066964012930971	0.106962380400779	0.0534811902003897	0.257128228487654	0.456697200186943	-0.0764437573721056	-0.355052650429741	-0.129041945001739	-0.263034405833794	4	-0.205893189659345	0.126724021201089	0.0633620106005445	0.0174778734712782	0.092856962220868	-0.375792121900138	-0.128387581905842	-0.024662054234269	-0.185061382024346	4	-0.178475785016148	0.147359649335823	0.0736798246679115	0.0516999809078506
A0A1W2PQ51	0.0227622500838711	0.0294688381686883	0.0804097868966742	0.0106647346982192	4	0.0358264024618632	0.0307239233248154	0.0153619616624077	0.0584684412122248	0.177638289230709	-0.0667328835685177	-0.0882865324179551	-0.00630687361083238	-0.089133594234853	4	-0.0626149709580396	0.0389436579321883	0.0194718289660941	0.0182363261525602	0.114374302819895	0.0518975788515186	0.0229960055514917	-0.0189491028009902	-0.0743900253767366	4	-0.0046113859436791	0.0548636486002696	0.0274318243001348	0.872025139603854	0.926909984888344	0.0539052134853727	-0.0091252362476022	0.0324214776923775	0.018615678167347	4	0.0239542832743737	0.0264039575197227	0.0132019787598614	0.11953646172668	0.314772407491074	-0.0468172215197061	-0.0220053080832659	-0.00174766228626722	-0.0527787145422069	4	-0.0308372266078615	0.0235300847668176	0.0117650423834088	0.0395285050703122
A0A1W2PQS6	0.0659481832559034	-0.0250256932587402	0.0998309749624231	-0.0324755405745068	4	0.0270694810962699	0.0659931947706325	0.0329965973853162	0.443367418003228	0.621372139371237	-0.0715338698323389	-0.0988300266594247	0.228000354390358	0.0898644085545772	4	0.036875216613293	0.152211602523785	0.0761058012618926	0.645192195105805	0.816224656002121	-0.000997369580606922	-0.00552969262979758	0.0943923702749549	0.036525876025114	4	0.0310977960224161	0.0462144990321556	0.0231072495160778	0.226989523793238	0.421230342968092	0.0206016232366913	-0.0256975376423093	0.105950513114343	0.0046764872094732	4	0.0263827714795495	0.0564150351085856	0.0282075175542928	0.38572680410515	0.620240494047803	0	0.0230186166027298	0.0598714559773987	0.031861098955136	4	0.0286877928838161	0.0247495436699151	0.0123747718349575	0.0595917500275577
A0A1W2PQV2	0.00807480675633204	NA	0.112179367390068	0.17137793316958	3	0.0972107024386602	0.0826742007636358	0.0477319720659223	0.0590743959204382	0.178939778424333	0.0725124997843681	NA	0.355209374433454	0.174457944272746	3	0.200726606163523	0.143167428845528	0.082657753583152	0.0336924540177514	0.169920164685122	0.0547800873846398	NA	0.0553982386590912	0.276534840760184	3	0.128904388934638	0.127852095240597	0.0738154416036163	0.0912195519720943	0.233494246919256	0.100186488963277	NA	0.0861007372553212	0.0278342081967255	3	0.0713738114717746	0.038358504797581	0.0221462930705949	0.0119765175914834	0.0727008286727995	0.0853674232481461	NA	-0.0533733508757964	0.102707048164126	3	0.0449003735121587	0.0855479942889752	0.0493911575313724	0.326816905271148
A0A1W2PS43	0.110381370924992	0.104076998076231	0.265001941141667	-0.0434652300820661	4	0.108998770015206	0.12597406631455	0.062987033157275	0.134262939917167	0.294968653611625	0.0283223669997276	-0.104130810482734	0.366236396582478	0.34623850229354	4	0.159166613848253	0.234036704358365	0.117018352179183	0.222654303112888	0.48143456582291	0.0383691940068716	0.1063631874411	0.43416321076603	0.269186632815389	4	0.212020556257347	0.176949705149818	0.0884748525749088	0.0535574453940437	0.164704127595314	-0.0221389772692486	-0.0594244122004331	0.174204728819548	0.0848888975865129	4	0.0443825592340949	0.105980440490639	0.0529902202453193	0.434364892824675	0.660173489697834	0.0310714459330059	0.075773855957349	0.373397109869064	0.270020836149901	4	0.18756581197733	0.16157560698923	0.0807878034946148	0.0593099847264489
A0A286YFF7	-0.0522175203523823	-0.0764183058818358	-0.0680286073141049	-0.185019374296086	4	-0.0954209519611021	0.0605691199951513	0.0302845599975757	0.0197943211340074	0.0867487738336742	-0.0763508861301148	-0.173016271193463	0.0706140642484048	-0.00629998835573825	4	-0.0462632703577279	0.103648384931516	0.051824192465758	0.406396388351287	0.645610123635457	-0.00499375729090223	-0.0256139386731299	0.0504490226873578	-0.0223678130284545	4	-0.00063162157628222	0.0352365276039616	0.0176182638019808	0.972564620059485	0.984945677199271	-0.143619238889023	-0.226035592567635	-0.0590544260645854	-0.209697348488081	4	-0.159601651502331	0.0759127337542417	0.0379563668771208	0.00565518608522736	0.0459559879990385	-0.14991071448381	-0.0872069459516717	0.0880791581159129	-0.12578557270874	4	-0.068706018757077	0.107666389186763	0.0538331945933814	0.249031776680342
A0A2Q2T6B6	NA	NA	NA	NA	0	NA	NA	NA	NA	NA	NA	NA	NA	NA	0	NA	NA	NA	NA	NA	NA	NA	NA	NA	0	NA	NA	NA	NA	NA	NA	NA	NA	NA	0	NA	NA	NA	NA	NA	NA	NA	NA	NA	0	NA	NA	NA	NA
A0A2Q2TH77	-0.0327589107522455	-0.238191545095307	NA	-0.0895457260684064	3	-0.120165393971986	0.106083999077036	0.0612476254238389	0.0659695443549913	0.192430896191658	-0.0126401807787703	-0.0639806259018219	NA	0.0387636172612885	3	-0.0126190631397679	0.0513721248368811	0.0296597101034164	0.632722379967599	0.809880563480661	-0.075733296384624	-0.0794136408190633	NA	-0.00741747156248301	3	-0.0541881362553901	0.0405463628535444	0.0234094535081541	0.0395189744943385	0.134231303254365	0.287841264313666	0.130374176740501	NA	-0.127235188296108	3	0.0969934175860196	0.209541933008827	0.120979091429161	0.381941184315781	0.617437540206742	0.0249104613063319	0.101445263559546	NA	-0.225430413150167	3	-0.0330248960947632	0.170965804282619	0.0987071531247907	0.705747020244502
A0A2Q3DP09	NA	NA	NA	NA	0	NA	NA	NA	NA	NA	NA	NA	NA	NA	0	NA	NA	NA	NA	NA	NA	NA	NA	NA	0	NA	NA	NA	NA	NA	NA	NA	NA	NA	0	NA	NA	NA	NA	NA	NA	NA	NA	NA	0	NA	NA	NA	NA
A0A2R8Y4J4	NA	NA	NA	NA	0	NA	NA	NA	NA	NA	NA	NA	NA	NA	0	NA	NA	NA	NA	NA	NA	NA	NA	NA	0	NA	NA	NA	NA	NA	NA	NA	NA	NA	0	NA	NA	NA	NA	NA	NA	NA	NA	NA	0	NA	NA	NA	NA
A0A2R8Y566	-0.00135020603293651	0.0523788104268663	NA	-0.33897683010238	3	-0.0959827419028166	0.212146875954814	0.12248305594025	0.391947479110978	0.572948370093078	0.252316537186052	0.0722702864901622	NA	-0.214816458941016	3	0.0365901215783994	0.235601601530552	0.136024648065171	0.760828025598736	0.878862484289254	-0.125984146419137	0.0530980373409108	NA	0	3	-0.024295369692742	0.0919799210504506	0.0531046321785182	0.608012840516256	0.761716873966284	0.0956246036100198	0.0933367974159712	NA	-0.147845467971394	3	0.0137053110181989	0.139911754897162	0.0807780893526696	0.84729311455754	0.929696180738169	-0.281155247762062	0.130413487724807	NA	-0.484866666013568	3	-0.211869475350274	0.313437083942062	0.180962984787961	0.220583946714046
A0A2R8Y595	-0.174825522252106	0.0318976182724375	0.117633797482176	NA	3	-0.00843136883249727	0.150342721225679	0.0868004105703467	0.912093177244684	0.95312976575796	-0.155694317496338	-0.237568659062577	0.0988012907196386	NA	3	-0.0981538952797587	0.175411974849978	0.101274150898719	0.299017719680275	0.560818973220327	-0.197353011549176	-0.117225994678109	0.161725139733014	NA	3	-0.0509512888314235	0.188490138093104	0.108824831967643	0.59989184426675	0.757824089100871	-0.16809533088523	0.0252478075738019	-0.0194174538272406	NA	3	-0.0540883257128896	0.101227191580525	0.0584435463083262	0.319017728178482	0.563312261847868	-0.221345852526759	-0.00136554202422942	0.0156344159419692	NA	3	-0.0690256595363397	0.132186726024938	0.0763180418537933	0.329047661716418
A0A2R8Y5A6	NA	NA	NA	NA	0	NA	NA	NA	NA	NA	NA	NA	NA	NA	0	NA	NA	NA	NA	NA	NA	NA	NA	NA	0	NA	NA	NA	NA	NA	NA	NA	NA	NA	0	NA	NA	NA	NA	NA	NA	NA	NA	NA	0	NA	NA	NA	NA
A0A2R8Y5P7	NA	NA	NA	NA	0	NA	NA	NA	NA	NA	NA	NA	NA	NA	0	NA	NA	NA	NA	NA	NA	NA	NA	NA	0	NA	NA	NA	NA	NA	NA	NA	NA	NA	0	NA	NA	NA	NA	NA	NA	NA	NA	NA	0	NA	NA	NA	NA
A0A2R8Y5S7	-0.113678906135813	-0.0288172724211145	-0.164030427191459	-0.170222372368005	4	-0.119187244529098	0.0653517889463787	0.0326758944731893	0.0107375530732972	0.0562558456509141	-0.21288971907788	0.0261128403191313	-0.189726232416126	-0.14017765804826	4	-0.129170192305784	0.107873348083221	0.0539366740416106	0.0536702961248198	0.221707313409201	-0.195068458354622	-0.0289886654537866	-0.20368898265804	-0.171035193910248	4	-0.149695325094174	0.0816486863777202	0.0408243431888601	0.010493941228142	0.058928492231091	-0.147669859353108	-0.012791553445372	-0.161032059246176	-0.172268941910612	4	-0.123440603488817	0.074448177265005	0.0372240886325025	0.0160812150374556	0.0880679584388193	-0.0929698180103663	-0.0584956493101445	-0.208198539753694	-0.169224833973637	4	-0.13222221026196	0.0686001770936469	0.0343000885468235	0.00841229811883678
A0A2R8Y5V9	0.111630998582929	-0.143345660447502	0.00883285437219538	0.114287365772376	4	0.0228513895699999	0.121189019695381	0.0605945098476904	0.719062909273895	0.834124011793931	-0.0137947987202622	-0.23951168298037	0.101736581744185	0.245112497836531	4	0.0233856494700211	0.204775533216201	0.1023877666081	0.826918443221233	0.914663173749648	-0.0210909400878366	-0.0368938635391327	0.417602291138147	0.245667273863706	4	0.151321190343721	0.219816330409371	0.109908165204685	0.217740421444954	0.410879709131146	0.024206860533653	-0.334260848824689	0.318838810964122	0.202176840115047	4	0.0527404156970332	0.285028503497594	0.142514251748797	0.724041144453709	0.861395445883397	0.0853674232481461	-0.110594611778988	0.207847484586066	0.0948591863414413	4	0.0693698705991664	0.132248366594712	0.0661241832973561	0.334546840412762
A0A2R8Y6Y7	-0.100596443322295	-0.0351587992949411	-0.0541638392398485	-0.0349104694915607	4	-0.0562073878371612	0.0309363117192439	0.015468155859622	0.010916124413669	0.0570924638451927	-0.0775576574601087	-0.0165638448744485	-0.0808897403732194	-0.0382193222304902	4	-0.0533076412345667	0.0312335259038325	0.0156167629519163	0.014257354584849	0.0977655773872216	-0.0694424650177443	0.0153713254513945	-0.0701326434247677	-0.0481444479618765	4	-0.0430870577382485	0.0402866022353839	0.020143301117692	0.0762527928209369	0.208862859219837	-0.0803098473343422	0.0252478075738019	-0.0813280550782379	-0.036365745602519	4	-0.0431889601103243	0.0502085592322676	0.0251042796161338	0.136152477169291	0.343276846107396	-0.0796320184732137	-0.0499925105048816	-0.0228864293444176	-0.0659141167313409	4	-0.0546062687634634	0.0243693150788608	0.0121846575394304	0.00418542117746303
A0A2R8Y738	NA	NA	NA	NA	0	NA	NA	NA	NA	NA	NA	NA	NA	NA	0	NA	NA	NA	NA	NA	NA	NA	NA	NA	0	NA	NA	NA	NA	NA	NA	NA	NA	NA	0	NA	NA	NA	NA	NA	NA	NA	NA	NA	0	NA	NA	NA	NA
A0A2R8Y761	0.0094162248361337	NA	-0.0434715030701262	-0.0227767138557054	3	-0.0189439973632326	0.0266513644595431	0.0153871724449881	0.201124826638915	0.382630806122996	-0.0994539552897755	NA	0.116324117967232	0.0615315023223722	3	0.0261338883332761	0.112159651977515	0.0647554052614333	0.649920050738831	0.819059067352238	0.0276500326048413	NA	-0.0918549364692903	0.113768874957574	3	0.0165213236977085	0.10326264609181	0.0596187165183398	0.753911105147168	0.853765615322867	-0.0433646441617073	NA	-0.049042622936519	-0.0654794137675916	3	-0.0526288936219393	0.0114852845742787	0.00663103214067927	0.000220022614048121	0.0058344593181357	-0.110947558939422	NA	-0.093808215275035	0.0400582519217556	3	-0.054899174097567	0.0826808553564417	0.0477358140968702	0.227667429453226
A0A2R8Y7B1	NA	0.145039545854729	0.218801786923863	-0.0215689322523994	3	0.114090800175397	0.123137684336158	0.071093575198868	0.113204126049996	0.266108921500108	NA	0.0878502979576204	0.369893420190567	-0.122961522471726	3	0.111594065225487	0.247283892499524	0.142769421900858	0.393067636247349	0.635375006145431	NA	0.114542911923812	0.298811357871143	-0.0837683576925977	3	0.109861970700786	0.191332807166618	0.110466047722454	0.287934238810882	0.487633167465152	NA	-0.0862126229147414	0.311086535239936	0.0155296982936044	3	0.0801345368729328	0.206378279243479	0.119152555076115	0.457988323195507	0.679857377719413	NA	0.121658484449055	0.302940364746368	-0.0325806540637962	3	0.130672731710542	0.167942046570003	0.0969613857954481	0.168142942939147
A0A2R8Y811	0.0107563968237169	-0.0237640446948291	0.02198155841849	0.0189053652521514	4	0.00696981894988231	0.021029488295671	0.0105147441478355	0.532042843386917	0.69918846998016	-0.0679316331521432	-0.0865367504679953	-0.0318137486757932	-0.105948412095518	4	-0.0730576360978624	0.0315743768785963	0.0157871884392982	0.00358649395201581	0.0426126156752654	-0.00399362204052645	-0.0301153309080707	0	-0.0759488532332984	4	-0.0275144515454739	0.0349424779924824	0.0174712389962412	0.166360375325628	0.346116596427648	0.0609427642253068	-0.0256975376423093	0.0361883076152968	-0.0283818013698225	4	0.010762933207118	0.0448186764807973	0.0224093382403986	0.64803160505695	0.807169156195781	0.0290207063682439	-0.0471692316373544	0.0781863533574811	-0.0240101632694427	4	0.00900691620473196	0.0560720769630784	0.0280360384815392	0.758908006172354
A0A2R8Y849	-0.0578256714022956	-0.0908782405533659	0.069193442424423	0.0887915151901061	4	0.00232026141471694	0.0899125391169441	0.044956269558472	0.960513609934946	0.978079572888797	-0.214216335300911	-0.263034405833794	0.0109711178210032	0.086908065223165	4	-0.0948428895226341	0.17006706463153	0.085033532315765	0.307366042266187	0.567598607044283	-0.0809966916458267	-0.134085727931319	-0.0120296888611995	0.0451561811685541	4	-0.0454889818174478	0.0784139671595841	0.0392069835797921	0.290031535182463	0.489539548216966	-0.0320886376768537	-0.221786119566277	0.0696543838913527	0.146841388329271	4	-0.00934474625562667	0.159461168618619	0.0797305843093093	0.910523244730402	0.959577143337337	-0.138341325771673	-0.100315825004771	0.0121747139461023	0.12984317810164	4	-0.0241598146821754	0.120932867244527	0.0604664336222637	0.703317202658221
A0A2R8Y855	-0.193223582945491	-0.293371104452109	0.0649647289692362	-0.424184872705323	4	-0.211453707783422	0.207126771192905	0.103563385596452	0.0872290717891387	0.22441998639878	-0.0982287364977591	-0.107675517526146	0.120671770803141	-0.11272959986077	4	-0.0494905207703832	0.113600607565144	0.0568003037825721	0.417082218132967	0.654809074056247	0.114019290759316	-0.370476143892419	0.150975898641322	-0.401781402576577	4	-0.126815589267089	0.300081219317356	0.150040609658678	0.430403090547953	0.623826647782547	-0.135551957620908	-0.139323959374304	0	-0.122128297863019	4	-0.0992510537145578	0.0665776072357449	0.0332888036178725	0.0245884248864054	0.113829721947325	-0.0862855047051526	-0.113544909414298	0.19417254768899	-0.186654640100013	4	-0.0480781266326184	0.166967604323927	0.0834838021619633	0.585620968249595
A0A2R8YDQ0	NA	NA	NA	NA	0	NA	NA	NA	NA	NA	NA	NA	NA	NA	0	NA	NA	NA	NA	NA	NA	NA	NA	NA	0	NA	NA	NA	NA	NA	NA	NA	NA	NA	0	NA	NA	NA	NA	NA	NA	NA	NA	NA	0	NA	NA	NA	NA
A0A2R8YDR3	NA	NA	NA	NA	0	NA	NA	NA	NA	NA	NA	NA	NA	NA	0	NA	NA	NA	NA	NA	NA	NA	NA	NA	0	NA	NA	NA	NA	NA	NA	NA	NA	NA	0	NA	NA	NA	NA	NA	NA	NA	NA	NA	0	NA	NA	NA	NA
A0A2R8YDT1	NA	NA	NA	NA	0	NA	NA	NA	NA	NA	NA	NA	NA	NA	0	NA	NA	NA	NA	NA	NA	NA	NA	NA	0	NA	NA	NA	NA	NA	NA	NA	NA	NA	0	NA	NA	NA	NA	NA	NA	NA	NA	NA	0	NA	NA	NA	NA
A0A2R8YEA7	0.0333508850720662	0.104076998076231	0.0859854268448404	0.17137793316958	4	0.0986978107906794	0.0569887744833004	0.0284943872416502	0.0134055047338654	0.0666526987014391	-0.351985328743542	0.258635941936277	0.146486088477484	0.0942875955887625	4	0.0368560743147453	0.268142416174522	0.134071208087261	0.792614393485474	0.898274336471572	0.0776351402651267	0.190988394459805	0.253590965124209	0.130086052187452	4	0.163075138009148	0.0760713214508885	0.0380356607254443	0.0051633902682458	0.0369879828931447	-0.019662246977036	0.368822944296021	0.282828275198422	0.108252890652023	4	0.185060465792358	0.174296668341144	0.0871483341705718	0.0779045718920967	0.241544123928008	0.118534287183345	0.082234659593711	0.258369260165232	-0.0880757666554997	4	0.0927656100716973	0.142481692506961	0.0712408462534803	0.240618530397822
A0A2R8YEK8	-0.269255843419427	-0.016217235641481	-0.0649360122587232	-0.0807141591046853	4	-0.107780812606079	0.111095086676973	0.0555475433384867	0.100395335614977	0.247145846550551	-0.154420414507704	0.0596839903830486	-0.131694111044711	-0.0741660186368817	4	-0.075149138451562	0.0960246640001581	0.048012332000079	0.168572145768996	0.416675058593357	-0.20537755769359	0.0153713254513945	-0.0882117652381037	-0.118686773895826	4	-0.0992261928440314	0.0911056809228608	0.0455528404614304	0.0722338397145817	0.201627790819188	-0.181874757899024	-0.00729556569051992	-0.0590544260645854	-0.118733719730095	4	-0.0917396173460561	0.0753926272149836	0.0376963136074918	0.0509092013726222	0.185217882796112	-0.228687827867927	-0.0542378153069876	-0.0282198736474581	-0.0955392858406192	4	-0.101671200665748	0.0890989103049346	0.0445494551524673	0.062609601064567
A0A2R8YEL6	-0.182462888107707	-0.278248376455088	0.0734097972254929	-0.201336551525963	4	-0.147159504715816	0.152770623848015	0.0763853119240076	0.102333688886136	0.25007623178685	-0.148067718021638	-0.0847890881817281	-0.0909084961982105	-0.015801856122893	4	-0.0848917896311174	0.0541628044131064	0.0270814022065532	0.0202037829751785	0.123106381247569	-0.204228457640098	0.0636983424946574	-0.0206841541717378	-0.113875112823434	4	-0.0687723455351531	0.115821090853298	0.0579105454266492	0.2798831992212	0.478285421846064	-0.0854808028375005	-0.153418789260091	0.0511580402739633	-0.0443941193584535	4	-0.0580339177955203	0.0855580368546636	0.0427790184273318	0.223728566908033	0.462853978213127	0.154722594798642	-0.0303446089959955	-0.0317864886676505	-0.166078278656773	4	-0.0183716953804441	0.131785400525694	0.065892700262847	0.789749253238745
A0A2R8YFH0	0.167974297985144	-0.0389771386413362	-0.177327249804917	-0.122830317780478	4	-0.0427901020603969	0.151594691279455	0.0757973456397274	0.592853058518686	0.745188299639078	0.30512695773345	-0.169307541539504	-0.168352581623559	-0.105948412095518	4	-0.0346203943812829	0.228430058511161	0.114215029255581	0.772036413535453	0.886217517786752	0.0576568481402036	-0.0597217929933942	-0.00514330327595963	-0.156119201917282	4	-0.040831862511608	0.090593781035673	0.0452968905178365	0.402094218558293	0.599078769197497	0.0921936982097465	-0.121402051377041	0.0324214776923775	0.0730634621897233	4	0.0190691466787014	0.0969072208710214	0.0484536104355107	0.70751430189135	0.850085745078518	0.318154148434172	-0.0973924297980053	-0.23261709234691	0.0576605683871918	4	0.0114512986691122	0.236374188792305	0.118187094396153	0.925968165867379
A0A2R8YG42	-0.0149222256064647	-0.2192945136808	-0.112035789553197	0.0364069350100922	4	-0.0774613984575925	0.112826070570536	0.0564130352852679	0.218821901132873	0.403598906116337	0.138439292250041	-0.0485689002689748	-0.131694111044711	-0.0593521344933944	4	-0.0252939633892597	0.115226229839477	0.0576131149197383	0.676007754407688	0.830445619842435	0.113097735288256	-0.178366289492013	-0.213577267022488	0.00590664096672198	4	-0.0682347950648808	0.154522726829638	0.077261363414819	0.411130795031654	0.605971912911112	0.0432840977288	-0.0939586551653823	-0.165351508703052	0.386655697909021	4	0.0426574079423468	0.245130492012677	0.122565246006339	0.739696852746266	0.87007921628481	0.0534392589614605	-0.134367673539224	-0.116350783926123	0.0359654972878727	4	-0.0403284253040034	0.0987183205828221	0.049359160291411	0.445127760578726
A0A2R8YGH5	0.00134894356801885	-0.279753535737038	NA	-0.199969715762057	3	-0.159458102643692	0.144863881164187	0.0836372007859971	0.0716493549117591	0.201110492013229	0.149827686836534	-0.0316356654886736	NA	-0.324680955279996	3	-0.0688296446440454	0.239430902192837	0.138235495833349	0.577670643604513	0.781513957970871	0.495504230327133	-0.183371307663203	NA	-0.312709564857984	3	-0.000192214064684365	0.434129381556424	0.250644715304727	0.999304108758369	0.999980982572926	0.173446744911441	-0.0349872995595682	NA	-0.206090609007347	3	-0.0225437212184916	0.190074413681502	0.109739513905075	0.815802099274274	0.912720113288723	0.0514200913248084	-0.172315548867306	NA	-0.233641562469407	3	-0.118179006670635	0.15004369535816	0.0866277679052398	0.163913960259411
A0A2U3TZM0	-0.0733614509483247	0.0160369633631459	0.0277871800996957	-0.0410158321407476	4	-0.0176382849065577	0.0477810149378239	0.0238905074689119	0.488195049363395	0.660910718417171	-0.0571785768552688	0.126079748379575	-0.00947067979300364	-0.0958360222753445	4	-0.00910138263601047	0.0967959862811203	0.0483979931405602	0.857034005490841	0.928940049694805	-0.0210909400878366	0.0424192688148841	0.0271255001963813	-0.0650722639826927	4	-0.00415460876481599	0.0488035904599941	0.0244017952299971	0.870402950103252	0.925836776270981	-0.0610821743570167	0.0198746354749502	-0.00579784453811277	-0.0204417976140068	4	-0.0168617952585465	0.0338636220402697	0.0169318110201348	0.357766959394733	0.597860430210215	-0.120021142564884	-0.00546994035696613	0.058194878170015	-0.0732635724668858	4	-0.0351399443046802	0.0779955705216187	0.0389977852608093	0.402267047460273
A0A2Y9D025	0.0147694593303405	-0.00995824516979849	-0.159075545248694	-0.00954640400318629	4	-0.0409526837728346	0.0795926656347652	0.0397963328173826	0.343137969124959	0.529237796257526	0.00684824881258966	-0.138162439057524	-0.164820890653306	0.057006579509303	4	-0.0597821253472344	0.108406371487247	0.0542031857436235	0.312320335288537	0.569561554752195	0.0198039491416654	-0.0335006160927094	-0.0206841541717378	-0.0208657878632226	4	-0.0138116522465011	0.0231995406997415	0.0115997703498707	0.278743896038867	0.476663729103303	0.0206016232366913	-0.044337267742152	-0.139626695642905	-0.0283818013698225	4	-0.047936035379547	0.0670818083247153	0.0335409041623577	0.202883853848842	0.435546459202936	0.0554556045599651	0.0162864763378076	-0.078973174112093	0.031861098955136	4	0.00615750143520394	0.0589938017899139	0.029496900894957	0.84154927003517
A0A3B3IRL5	-0.0410661988162789	-0.0829730424680197	-0.144312192576954	-0.121535840312843	4	-0.0974718185435239	0.0453317630652359	0.022665881532618	0.00509069886485402	0.0353774314217327	-0.125426877827541	0.0357845751399736	-0.315257114499985	-0.0874628412503395	4	-0.123090564609473	0.145423617933306	0.0727118089666531	0.141427578850922	0.384508779531398	-0.160112823957809	-0.132874905333272	-0.259957202304785	-0.2657003044197	4	-0.204661309003891	0.0681206039540098	0.0340603019770049	0.000957150724054656	0.0125258296052694	-0.327431070564749	0.228357730678674	-0.174029399775049	-0.135787051160913	4	-0.102222447705509	0.235432226002382	0.117716113001191	0.418560330811382	0.648935602695364	0.114671647550947	-0.0670492022763258	-0.282730207174713	-0.222158994422115	4	-0.114316689080552	0.177635347008306	0.0888176735041528	0.245481756513314
A0A3B3IRM4	NA	-0.106819784422387	-0.0253241563598667	-0.0882807588318287	3	-0.073474899871361	0.0427176127960602	0.0246630252469436	0.016201372221174	0.0753488434224755	NA	-0.0553982386590912	0.104665912782857	-0.031778708672661	3	0.00582965515036829	0.0864055838258833	0.0498862870813605	0.894370156182026	0.946636138662402	NA	0.0305806007794831	0.0750270454080237	0.0147215057067656	3	0.0401097172980908	0.031261679031746	0.0180489388042982	0.0450931596258058	0.147210174458759	NA	-0.0594244122004331	-0.0194174538272406	0.0460964145894539	3	-0.0109151504794066	0.0532717382227131	0.0307564524030827	0.689069772548725	0.839308683160635	NA	-0.085757729314602	-0.0353619428914778	-0.0211646099980423	3	-0.0474280940680407	0.0339449814983391	0.0195981442057029	0.034087739905689
A0A3B3IRT8	-0.134268175638148	-0.118892616722963	-0.0404310487500751	-0.120242523291323	4	-0.103458591100627	0.0425895570956781	0.021294778547839	0.00282743050924485	0.0232264196452369	-0.184008599090751	-0.32977221373275	-0.00472756853698467	-0.00946032924906628	4	-0.131992177652388	0.156026691496075	0.0780133457480374	0.141610639626212	0.384508779531398	-0.242640518004338	-0.162218866915416	-0.00171239787568619	-0.0743900253767366	4	-0.120240452043044	0.104714094423353	0.0523570472116765	0.0613903436796527	0.181244749794486	-0.261570483799621	-0.221786119566277	-0.0772526426481207	-0.0605861528610393	4	-0.155298849718764	0.101284948941371	0.0506424744706856	0.0220385754400322	0.105750180246377	-0.255932664058809	-0.134367673539224	-0.108797389494488	-0.119685373172322	4	-0.154695775066211	0.0682996570109818	0.0341498285054909	0.0039755204271548
A0A3B3IS71	-0.210297096304433	NA	0.0292349424298107	-0.038570585723353	3	-0.0732109131993251	0.123466042338684	0.071283152780017	0.27425120995414	0.461872650524438	-0.1266754240248	NA	0.0433925955133805	-0.056080715765342	3	-0.0464545147589204	0.0854416796813578	0.0493297767640457	0.31145784065477	0.569561554752195	-0.0937077433953807	NA	0.058688308593276	0.105540553940294	3	0.0235070397127299	0.104178991441775	0.0601477687528123	0.660061879583389	0.796716969084741	0.0667812790367323	NA	0.0210616155278296	-0.085220132817193	3	0.00087425391578963	0.0779856043000124	0.0450250096355278	0.982382193902265	0.991964918636781	-0.319835715926122	NA	0.101164917135573	0.00977155674264481	3	-0.0696330806826347	0.221447974912996	0.127853047927516	0.543797582752672
A0A3B3ISP1	-0.12099853137991	-0.044084029074425	0.186726320755122	0.096598929131189	4	0.0295606723579941	0.138186811703747	0.0690934058518735	0.68370053262787	0.807821939212913	0.0801085047607534	0.0114825680472926	0.143640535206084	-0.0791379765994079	4	0.0390234078536804	0.0954870657147591	0.0477435328573795	0.444961367954772	0.680039542632597	-0.300404165079363	0.00220595614980756	0.588950209197325	-0.139724763666613	4	0.0377568091502892	0.387698585925537	0.193849292962768	0.851997677608196	0.912099010641731	0.0313904191475465	0.0162813707509418	0.234465253637023	-0.130649852708873	4	0.0378717977066597	0.150062973867168	0.0750314869335841	0.631735374227796	0.796387004291338	0.463423530514019	0.196223488311646	0.428943101304062	-0.0513265805082946	4	0.259315884905358	0.238685787431436	0.119342893715718	0.0727739108460222
A0A3B3ISS6	-0.150654149877031	-0.17380676410511	-0.0193254157384236	-0.0984316892999947	4	-0.11055450475514	0.0685043531199708	0.0342521765599854	0.0179631753368953	0.0808075581003489	-0.169781997522793	-0.423847878054743	0.153575513263804	0.174457944272746	4	-0.0663991045102465	0.28569132450333	0.142845662251665	0.658442667509241	0.822088119051924	-0.169052868311023	-0.272558641968618	0.119814967154862	0.0523088732660415	4	-0.0673719174646844	0.184212765682486	0.0921063828412431	0.492066950323184	0.675837524228525	-0.313712789316969	-0.507055743874791	-0.103950964038908	-0.0589587471149937	4	-0.245919561086416	0.206476355598486	0.103238177799243	0.0546144159491388	0.19220248382799	-0.276075330397709	-0.252969367081619	-0.133491916747517	0.0208586048976642	4	-0.160419502332295	0.136049739748516	0.0680248698742581	0.0564189619808413
A0A3B3ISV5	NA	NA	NA	NA	0	NA	NA	NA	NA	NA	NA	NA	NA	NA	0	NA	NA	NA	NA	NA	NA	NA	NA	NA	0	NA	NA	NA	NA	NA	NA	NA	NA	NA	0	NA	NA	NA	NA	NA	NA	NA	NA	NA	0	NA	NA	NA	NA
A0A3B3ISW7	-0.370302618549216	0.163985987094916	-0.118433560751348	-0.174242890643688	4	-0.124748270712334	0.220721545797067	0.110360772898534	0.301472674291176	0.487353954215094	-0.431530005553221	0.150025444004607	-0.209600867891076	-0.134991211332925	4	-0.156524160193154	0.240056715245014	0.120028357622507	0.240004472752408	0.499678733560971	-0.40477152085982	0.0251671045931189	-0.20368898265804	-0.184424571137427	4	-0.191929492515542	0.175714987938963	0.0878574939694816	0.0716102650758901	0.201035443723463	-0.244118314840272	0.185806567551402	-0.116441908222105	-0.110282055014911	4	-0.0712589276314714	0.182142199728359	0.0910710998641793	0.463699970301679	0.683121350010709	-0.0708081680862075	0.0950701093903179	-0.067946151963069	-0.139606067295582	4	-0.0458225694886351	0.0995989030417762	0.0497994515208881	0.392989478028465
A0A3B3ISZ0	-0.0662789868426892	-0.0338882619685365	0.163182270824171	0.224260207797508	4	0.0718188074526135	0.143562585995556	0.0717812929977779	0.35568450672796	0.541134506209675	0.298630410707871	0.0261128403191313	0.0973314026241843	0.204773568700218	4	0.156712055587851	0.11976775517339	0.0598838775866949	0.0397492955202445	0.185793319049614	0.314931984685312	-0.0899485804252538	0.20393866447711	0.255616934271311	4	0.17113475075212	0.179866141332342	0.0899330706661711	0.105741976702163	0.255340821403955	0.207670915629682	-0.147361278439722	0.0696543838913527	0.153875507777821	4	0.0709598822147834	0.156237790067237	0.0781188950336186	0.398704196717617	0.632694376208586	0.10107038144186	-0.0570749746105171	0.0962716562290207	0.352418462109084	4	0.123171381292362	0.169563186140281	0.0847815930701407	0.196492475125613
A0A3B3ITH3	NA	NA	NA	NA	0	NA	NA	NA	NA	NA	NA	NA	NA	NA	0	NA	NA	NA	NA	NA	NA	NA	NA	NA	0	NA	NA	NA	NA	NA	NA	NA	NA	NA	0	NA	NA	NA	NA	NA	NA	NA	NA	NA	0	NA	NA	NA	NA
A0A3B3ITT5	0.209416890183884	0.108686251328821	0.23143492404744	0.320738243239803	4	0.217569077199987	0.0870977735134188	0.0435488867567094	0.00246219597160987	0.0209668124568356	0.291169786242515	-0.076082392830829	0.422491276777607	0.404390255079335	4	0.260492231317157	0.231785764568142	0.115892882284071	0.0656485669811305	0.249731648354999	0.315733259374551	0.175433580264963	0.249277972253126	0.358453970912476	4	0.274724695701279	0.0799969898616439	0.039998494930822	0.000469335764131404	0.00849582044891757	0.318506488917537	0.072726517740685	0.227892599713537	0.386655697909021	4	0.251445326070195	0.135737722078012	0.0678688610390062	0.0100303347573612	0.0649480455732948	0.326527329459177	0.252302906336333	0.102792322881619	0.333646045928558	4	0.253817151151422	0.107191750556605	0.0535958752783024	0.00320541963559986
A0A3B3ITX4	-0.0662789868426892	-0.0212440527163137	0.0578892118891147	-0.0179516423317247	4	-0.0118963675004032	0.0514831427085192	0.0257415713542596	0.660259824592853	0.793940115252265	-0.114238320786577	-0.00494921597173337	0.146486088477484	0.127755547198372	4	0.0387635247293865	0.122262149000249	0.0611310745001247	0.54940824315455	0.759312697833911	-0.140198005638838	-0.174623887806197	0.015320799283756	0.0263914988914009	4	-0.0682773988174694	0.103975972104084	0.0519879860520419	0.237057743942184	0.429889358090715	-0.0764437573721056	-0.0405900057889442	-0.0272582070444239	0.0506260730699679	4	-0.0234164742838765	0.0535533399684355	0.0267766699842178	0.415468769377556	0.648405828512314	-0.12229848327595	0.00816622014842167	0.0121747139461023	-0.0426443374084937	4	-0.0361504716474799	0.0626177369293189	0.0313088684646594	0.292143723478292
A0A3B3IUA2	0.224511623887467	0.146160956747483	0.211168462021435	0.297700707162932	4	0.219885437454829	0.0621500939042694	0.0310750469521347	0.000399376624051831	0.00612850525131312	-0.0114864861624001	0.0131154997902582	0.242701403736787	0.490805006896809	4	0.183783856065363	0.234514717995036	0.117257358997518	0.168076421868947	0.416294384418509	0.247665114606739	0.121662323823982	0.0237625731704176	0.319855044076755	4	0.178236263919474	0.131578843325405	0.0657894216627025	0.0351437342739663	0.124429110778032	0.20237661596017	0.0761820763769042	0.262069715031625	0.290358015886492	4	0.207746605813798	0.095067883581979	0.0475339417909895	0.00471652924005018	0.0412082887071436	0.249359468936717	0.254592898945537	0.249581242895248	0.426199605566144	4	0.294933304085911	0.0875442251962524	0.0437721125981262	0.000520495006656738
A0A3B3IUB5	-0.0480256674055559	-0.0174722988271051	0.00295029763530977	-0.0870168997576677	4	-0.0373911420887547	0.0391578047938503	0.0195789023969251	0.104741748224299	0.253916844332042	-0.139220677343913	-0.156401557342567	0.0234082210592259	-0.072512499784368	4	-0.0861816283529056	0.0815286438727324	0.0407643219363662	0.0789195536115874	0.280016209586653	-0.13362035728018	-0.116029233895348	-0.0576107231700951	-0.121903486579369	4	-0.107290950231248	0.0339177753609888	0.0169588876804944	0.000729103691986665	0.0108043159846847	-0.119551478927193	-0.143337021880927	-0.055041363557962	-0.146116654054643	4	-0.116011629605181	0.042359152632449	0.0211795763162245	0.00154699007879996	0.0195044298232388	0.0269670476002694	-0.051406224523825	-0.0300020789894677	-0.167650698475526	4	-0.0555229885971374	0.0817424695166876	0.0408712347583438	0.223162601811651
A0A3B3IUB9	0.179937011973838	-0.0517784208644254	-0.0695773944095914	-0.0349104694915607	4	0.00591768180206519	0.116873167731226	0.058436583865613	0.922638019673817	0.957149874218926	-0.0335660196333184	-0.00660273482424706	0	-0.065917310969075	4	-0.0265215163566601	0.0300100113692693	0.0150050056846346	0.127562566581245	0.363291764560205	0.153099404191722	-0.0666412069331848	-0.0487325718236424	-0.118686773895826	4	-0.0202402871152329	0.119308025700549	0.0596540128502747	0.745948440714218	0.850397123932496	0.192797639148152	0.0054475648396704	-0.187144899565307	0.00933786457933619	4	0.00510954225046294	0.155141424818301	0.0775707124091503	0.949621681173775	0.972181072716892	0.188188671074698	-0.0137139344518746	-0.141176062960694	-0.0426443374084937	4	-0.0023364159365911	0.138239445440858	0.0691197227204288	0.974131136755632
A0A3F2YNW8	-0.0424554093626097	0.0197126215065443	-0.0804657105523276	-0.0336924913348888	4	-0.0342252474358204	0.0412936376442224	0.0206468188221112	0.148462496829664	0.316503616301886	-0.0619478210031408	0.0533494245929337	-0.112857469031855	-0.128104825747685	4	-0.062390172797437	0.0821811285733717	0.0410905642866859	0.179724455285221	0.431270495267096	-0.0110091727086734	-0.0233684984674858	-0.0882117652381037	-0.115477217419936	4	-0.0595166634585497	0.0503807468413437	0.0251903734206719	0.0560788101821064	0.170549540423046	0.00365702360808914	0.0394791934144613	-0.0510394330004658	-0.00312610098671957	4	-0.00275732924115873	0.0372217020233186	0.0186108510116593	0.88707253290787	0.946231569153314	-0.0686106123819615	-0.0670492022763258	-0.154722594798642	-0.0970366342271215	4	-0.0968547609210127	0.0409667447588335	0.0204833723794167	0.00322966478192162
A0AV96	0.0425526158438784	-0.0112078728277361	-0.167343161232295	-0.095887252942233	4	-0.0579714177895963	0.0925413408417399	0.0462706704208699	0.256866079503722	0.442352238659307	-0.0126401807787703	-0.076082392830829	-0.224229079816065	-0.138446769969144	4	-0.112849605848702	0.0902853972286461	0.0451426986143231	0.0465381904709681	0.203008585560948	-0.130342745024033	-0.0155368659851789	-0.0276453017708076	-0.125127387453655	4	-0.0746630750584187	0.0615181601298928	0.0307590800649464	0.0513470937177741	0.160852087366664	-0.0458824371932261	-0.0294062672962684	-0.0390998196889404	-0.134072618349662	4	-0.0621152856320241	0.0484456900502677	0.0242228450251338	0.0426594728312748	0.163446877527178	0.0714857143789141	-0.0303446089959955	-0.0443395390107351	-0.172378267012511	4	-0.0438941751600819	0.100007449491473	0.0500037247457367	0.413807434998301
A0AVT1	-0.0691078015546768	-0.0948471427563116	-0.0480442328599503	0.0294317640937543	4	-0.0456418532692961	0.0535836750453732	0.0267918375226866	0.139350520690996	0.302409636790295	-0.072736616913996	-0.0778195333668864	-0.065990863993881	-0.00157241981875358	4	-0.0545298585233793	0.0356358432198053	0.0178179216099027	0.0222137835769937	0.130392752918936	-0.0343034561977852	-0.0852568851005318	-0.0755326311673575	-0.0223678130284545	4	-0.0543651963735323	0.0307064742791468	0.0153532371395734	0.0122047203256168	0.0646144825645174	-0.0333371838741124	-0.0708442214915372	-0.0895135808151015	0.0155296982936044	4	-0.0445413219717867	0.0463623653942613	0.0231811826971306	0.103059720655082	0.285807289479997	0.0912760801389215	-0.0261689330248021	-0.103158183457619	0	4	-0.00951275908587482	0.0801992858109421	0.0400996429054711	0.820372362256248
A0MZ66	-0.0691078015546768	-0.197793444469878	-0.0603095143091983	0.060557834461162	4	-0.0666632314681477	0.105556743070118	0.0527783715350591	0.253424026799555	0.440679370440583	-0.119200303462653	0.222392421336448	-0.117970392425508	-0.0414504434935033	4	-0.0140571795113041	0.16177333627132	0.0808866681356602	0.867746793594448	0.935706106727425	0.0804667310482895	0.029499525389152	-0.0363942372603994	0.0249379017499022	4	0.0246274802317361	0.0478382870477152	0.0239191435238576	0.342896614732326	0.544134627997806	0.107002383723825	0.118692371692865	-0.112266232250912	-0.0220263063299989	4	0.0228505542089449	0.110359507949237	0.0551797539746185	0.693188966948255	0.842662262225313	-0.173331602885562	-0.0973924297980053	-0.0882271830117352	0.0522673096169733	4	-0.0766709765195822	0.094041272598356	0.047020636299178	0.154100358850279
A1L0T0	0.63318215377526	0.107535317848642	0.0593070941073101	0.0954861677641144	4	0.223877683373832	0.273638176940938	0.136819088470469	0.152891596407127	0.323436876094294	-0.14048122354983	0.279138821929931	0.282050071212613	0.14206811538733	4	0.140693946245011	0.198502646598023	0.0992513232990115	0.206099431719309	0.463810230396021	0.226517051363917	-0.049404502007881	-0.0328882937588639	0.147557188413858	4	0.0729453610027575	0.135795729349799	0.0678978646748996	0.323964521921724	0.523791656546725	0.145029105617901	0.0377079285622684	-0.049042622936519	0.0656230380607835	4	0.0498293623261084	0.0800729457896561	0.040036472894828	0.259688550666779	0.500981805147206	-0.542663799364896	0.184260774322951	-0.0882271830117352	0.0454972594605238	4	-0.100283237148289	0.315205307656286	0.157602653828143	0.548067778731641
A1X283	NA	NA	NA	NA	0	NA	NA	NA	NA	NA	NA	NA	NA	NA	0	NA	NA	NA	NA	NA	NA	NA	NA	NA	0	NA	NA	NA	NA	NA	NA	NA	NA	NA	0	NA	NA	NA	NA	NA	NA	NA	NA	NA	0	NA	NA	NA	NA
A2A274	0.030711003199362	0.1063834654594	0.0117651623753534	0.0514050992999973	4	0.0500661825835282	0.0408861026367756	0.0204430513183878	0.0498546012780401	0.160184118517614	0.0516908654672134	0.188108945736087	-0.0142294363041394	0.0645402521947105	4	0.0725276567734679	0.0844270850327513	0.0422135425163757	0.1365799414225	0.376030203023878	0.0823513753932325	0.147802461287772	-0.0189491028009902	0.055160050164165	4	0.0665911960110449	0.0690204478837747	0.0345102239418874	0.101899608660072	0.251463279166855	0.108135242078768	0.106915203916512	0.0585850581740325	0.0700918956584324	4	0.0859318499569362	0.0253774370790593	0.0126887185395296	0.00050641741145218	0.00962830084792414	0.0372062321051075	0.0976235526071375	0.0276784516469507	0.0359654972878727	4	0.0496184334117671	0.0322816752708735	0.0161408376354367	0.0218273819718896
A2A2F0	-0.0719421738629906	0.081979665011239	NA	0.36942562935207	3	0.126487706833439	0.224024794986754	0.129340775690753	0.295148212641583	0.480988165399195	0.039497442556405	0.205352518037984	NA	0.267480310864986	3	0.170776757153125	0.117858641987455	0.068045718677781	0.0301093591970162	0.160247522627781	0.0188201816020872	-0.0110806615437338	NA	0.253135944767556	3	0.0869584882753031	0.144688373374932	0.0835358713166259	0.268570495547303	0.466602648298562	-0.181874757899024	0.0623099017953466	NA	0.226401766318593	3	0.0356123034049717	0.205443426219154	0.118612817430867	0.734358812914544	0.867174488844011	-0.216471878158288	0.0912314506975465	NA	0.0013999952975275	3	-0.0412801440544045	0.158229360008077	0.0913537635943655	0.61231266851275
A2A376	0.146188220619298	0.081979665011239	0.204776360111844	0.18504290639347	4	0.154496788033963	0.054125983098523	0.0270629915492615	0.001250203439538	0.013077387535375	0.172338278914561	0.177954187585315	0.308969195909628	0.192448619163459	4	0.212927570393241	0.0645858843274406	0.0322929421637203	0.000584704504476573	0.0140282675954974	0.00795423126392159	0.162670628343054	0.0959944748714564	0.254376972836245	4	0.130249076828669	0.104224594948953	0.0521122974744766	0.046566499950507	0.149775838637261	0.346614973738832	-0.135322028816808	-0.112266232250912	0.218371903060765	4	0.0793496539329693	0.240526170534612	0.120263085267306	0.533874430569528	0.730272580819767	-0.189955433379212	0.173408859079479	0.0781863533574811	0.219187321343643	4	0.0702067751003475	0.183115557036816	0.0915577785184079	0.472281737280912
A2ACR1	-0.0190188541259431	-0.0895576958013138	0.173693756602773	-0.0312596154786036	4	0.008464397799228	0.114371322471652	0.0571856612358258	0.887179084879161	0.938790221538126	-0.0406092966374382	-0.0333200732000265	0.0929127313571793	-0.109335021727845	4	-0.0225879150520327	0.0842721963843572	0.0421360981921786	0.61119076911423	0.799280314686867	-0.111908961207414	-0.0516908654672134	0.119814967154862	-0.0359568777764096	4	-0.0199354343240439	0.0987495120971361	0.049374756048568	0.700387248328011	0.828265113135828	0.0121542002846291	-0.0146282119249891	0.105950513114343	-0.086877450679967	4	0.00414976269850394	0.0797204066570752	0.0398602033285376	0.920476515883123	0.9630983841522	0.0493980937395968	-0.0930184141961948	0.183446141095931	-0.0732635724668858	4	0.0166405620431119	0.127808452456319	0.0639042262281593	0.80326250805821
A2RRP1	NA	-0.0199857054573934	0.227656584810004	-0.0215689322523994	3	0.0620339823667371	0.143435565609898	0.0828125624162411	0.411634580637427	0.591712476113619	NA	0.199627530204354	0.113418386791821	0.078002512001273	3	0.130349476332483	0.0625552364554747	0.036116282606789	0.00761536708808742	0.0654935028189811	NA	0.117598391444083	0.454288315361338	0.0161854277409385	3	0.196024044848786	0.229339208094253	0.132409053528953	0.137041541353915	0.303099217850046	NA	0.155092571944487	0.0897301606560122	-0.101879614019214	3	0.047647706193762	0.133554767117899	0.0771078807470768	0.49335340501331	0.70300182392319	NA	0.0149362703048711	0.33652547110032	0.00977155674264481	3	0.120411099382612	0.187178350280554	0.108067470920948	0.240422245238542
A2VDF0	NA	0.00371669172727793	0.394214735153918	-0.190437953589406	3	0.0691644910972634	0.297770469397957	0.171917860663632	0.65092371379246	0.785525902912018	NA	0.412565013599323	0.710930338025634	0.1263164497814	3	0.416603933802119	0.292327871129856	0.168775575088453	0.0318746854015754	0.164738551830474	NA	0.00330767062937953	0.43416321076603	-0.174370906473504	3	0.0876999916406349	0.312921700822066	0.180665428204896	0.586945260566785	0.747403337276071	NA	-0.0537482276682298	0.182726283665402	0.192645077942396	3	0.107207711313189	0.139480128835688	0.080528889929888	0.172438458907342	0.398811225493257	NA	-0.238404739325079	0.230354883995636	-0.1914449988152	3	-0.0664982847148809	0.258152391306559	0.149044352612787	0.61669034905752
A3KMH1	0.187067314993238	-0.0530648186677917	0.0929248103101231	-0.071936326475028	4	0.0387477450401353	0.123307690722758	0.0616538453613788	0.552850821691224	0.716775678806527	0.328092979808961	0.0785224958025011	0.104665912782857	-0.0791379765994079	4	0.108035852948728	0.167671878278637	0.0838359391393183	0.244972215454606	0.50411913364144	0.443665298807515	-0.00663817907763781	0.166307552397313	-0.186107014524473	4	0.104306914400679	0.268115184239823	0.134057592119912	0.466089640084254	0.655343712546372	0.460097221897495	-0.16561065089458	0.15007306634665	-0.386182636606659	4	0.0145942501857267	0.369649981646035	0.184824990823017	0.939630075740336	0.968132828549092	0.463423530514019	0.21280637250725	0.288712487686912	-0.194647430853544	4	0.192573739963659	0.278658609774074	0.139329304887037	0.216178454766709
A4D1P6	0.0620751741086972	-0.36825208565968	NA	0.197542869421729	3	-0.036211347376418	0.29542539333667	0.170563930368378	0.809791728623368	0.894021198870686	-0.369615222765333	-0.274941172517968	NA	-0.00787929342958596	3	-0.217478562904296	0.187589136867808	0.108304638667679	0.0616169455975775	0.24222110083417	-0.67230071924081	-0.528676185749198	NA	-0.0558142961215965	3	-0.418930400370535	0.322563141925523	0.186231916821352	0.0433672383130119	0.143232783650635	-0.254273072991044	-0.385624349448296	NA	0.0581440423539843	3	-0.193917793361785	0.227957597427768	0.131611380238742	0.13853324675936	0.347252077075907	-0.293933852483365	0.00680838942147076	NA	0.0222385141763607	3	-0.0882956496285112	0.178254943949722	0.102915539873753	0.352182854541709
A5A3E0	NA	NA	NA	NA	0	NA	NA	NA	NA	NA	NA	NA	NA	NA	0	NA	NA	NA	NA	NA	NA	NA	NA	NA	0	NA	NA	NA	NA	NA	NA	NA	NA	NA	0	NA	NA	NA	NA	NA	NA	NA	NA	NA	0	NA	NA	NA	NA
A5PLN9	-0.0313790014735491	-0.063397504131259	-0.0373969886604418	-0.0312596154786036	4	-0.0408582774359634	0.0152969304562794	0.00764846522813972	0.00175789720718139	0.0161332596843115	-0.0896812165425982	-0.259087221317131	0.0449184497443407	-0.117836490293858	4	-0.105421619602312	0.124655716414322	0.0623278582071611	0.141711012939575	0.384508779531398	0.130507413547885	-0.091123892132528	-0.0683371297631535	-0.107484426666405	4	-0.0341095087535504	0.110912547590098	0.0554562737950489	0.561095692186117	0.726731909802327	0.0480142496411971	-0.0238467419543678	0.0343061220373204	-0.147845467971394	4	-0.0223429595618111	0.089279330029301	0.0446396650146505	0.634536274825987	0.797921447087753	-0.0974432945896742	-0.051406224523825	-0.133491916747517	-0.119685373172322	4	-0.100506702258334	0.0359448057129533	0.0179724028564766	0.00139071661902241
A5YKK6	-0.00947808691633684	0	-0.145945124319919	-0.053304620588854	4	-0.0521819579562775	0.0666817543157275	0.0333408771578638	0.168595330668347	0.34390262119461	0.00114363465432932	0.00984778595634717	-0.0627007940596963	0	4	-0.0129273433622549	0.0334724341240097	0.0167362170620048	0.469190561977992	0.694255050836745	-0.00799832979142667	0.0668633054624664	-0.0469634789705867	-0.0118863291601319	4	3.79188508029676e-06	0.047894077633982	0.023947038816991	0.999878792639618	0.999980982572926	-0.00611571513908812	-0.012791553445372	-0.0590544260645854	0.00933786457933619	4	-0.0171559575174273	0.0294297992436736	0.0147148996218368	0.287903439941899	0.531338277743809	0.0493980937395968	0.0509554931058528	-0.103158183457619	-0.0197439352984149	4	-0.00563713297764601	0.0728948070058942	0.0364474035029471	0.882157097561039
A6NC86	NA	NA	NA	NA	0	NA	NA	NA	NA	NA	NA	NA	NA	NA	0	NA	NA	NA	NA	NA	NA	NA	NA	NA	0	NA	NA	NA	NA	NA	NA	NA	NA	NA	0	NA	NA	NA	NA	NA	NA	NA	NA	NA	0	NA	NA	NA	NA
A6NDG6	-0.039678324692036	-0.0543523645282518	-0.0711278459729914	-0.037349514942978	4	-0.0506270125340643	0.0156026507033763	0.00780132535168817	0.000636681372235845	0.00836820777508243	-0.0114864861624001	0.0501716809273491	-0.224229079816065	-0.141910625272716	4	-0.081863627580958	0.124177062628372	0.0620885313141861	0.235429074554233	0.494924959928683	-0.03226286881248	0.00440854442632138	-0.215563082946332	-0.134842542286867	4	-0.0945649874048393	0.0999001744012042	0.0499500872006021	0.107177085748974	0.257753643770206	0.09790734940414	0.0623099017953466	-0.055041363557962	-0.182864057149811	4	-0.0194220423770715	0.127054220851194	0.0635271104255971	0.77014110127502	0.885086364873381	0.079434467494405	0.0162864763378076	-0.141176062960694	-0.0527787145422069	4	-0.0245584584176721	0.0946553148358492	0.0473276574179246	0.622403862777392
A6NFX8	0.124068101821152	0.0808072187533838	0.020526495218103	0.0317605701537272	4	0.0642905964865915	0.0476782554497075	0.0238391277248537	0.0357253330842033	0.128946217261571	0.049481531129027	0.0753997780446009	0.0721114126349071	0.0986972629267726	4	0.0739224961838269	0.02013795939095	0.010068979695475	0.000326640551635009	0.0101350556199235	-0.0160412498050568	0.089863278746806	0.200964034472999	0.0986475879329115	4	0.0933584128369149	0.0886706402543879	0.044335320127194	0.0798421883795115	0.216663317299159	-0.00979762706748027	0.0588209157154668	0.196256934224863	0.092230872927681	4	0.0843777739501327	0.0858307963903109	0.0429153981951554	0.0968668517670311	0.277562552504014	0.0574691359976134	0.0666798453988693	0.180366748163959	-0.0070204276777725	4	0.0743738254706674	0.0778984166766439	0.0389492083383219	0.104779369765074
A6NHL2	NA	NA	NA	NA	0	NA	NA	NA	NA	NA	NA	NA	NA	NA	0	NA	NA	NA	NA	NA	NA	NA	NA	NA	0	NA	NA	NA	NA	NA	NA	NA	NA	NA	0	NA	NA	NA	NA	NA	NA	NA	NA	NA	0	NA	NA	NA	NA
A6NHR9	0.025416703529849	0.0355331389889431	0.0790125034548689	0.0502569137711167	4	0.0475548149361944	0.0233202642514482	0.0116601321257241	0.00651373880121538	0.0418068628366753	0.0283223669997276	0.00329006993418476	-0.150779952175609	0.0140751852117228	4	-0.0262730825074935	0.0836352923744518	0.0418176461872259	0.552970284402573	0.762256803351107	0.00993595553278803	0.0109962044610812	-0.073730388533372	0.022026306329999	4	-0.00769298055237597	0.0443630487741298	0.0221815243870649	0.740567174890441	0.84841194587155	0.116040440164114	0.111974338408521	0.00192744857111438	0.153875507777821	4	0.0959544337303926	0.0654624822762438	0.0327312411381219	0.026232938099242	0.119427922898941	-0.0105076578183932	0.125417136269089	-0.0140409384776966	0.0830067642530264	4	0.0459688260565064	0.0694612792180081	0.0347306396090041	0.233836983676904
A6NML8	NA	NA	NA	NA	0	NA	NA	NA	NA	NA	NA	NA	NA	NA	0	NA	NA	NA	NA	NA	NA	NA	NA	NA	0	NA	NA	NA	NA	NA	NA	NA	NA	NA	0	NA	NA	NA	NA	NA	NA	NA	NA	NA	0	NA	NA	NA	NA
A6NNK5	-0.0564215885266124	-0.0608073866655514	-0.00295634333141221	-0.150286149448606	4	-0.0676178669930454	0.0610652570621117	0.0305326285310559	0.0687058024030125	0.196311569625999	-0.0184225333727763	0.0769619818148842	0.00157241981875358	-0.168158075268125	4	-0.0270115517518158	0.102670429774998	0.0513352148874989	0.617637094307072	0.802370836308671	0.298001588735435	0.0700213403773793	0.0766507878876878	-0.0435620352975779	4	0.100277920425731	0.142896563873456	0.0714482819367279	0.210046377229903	0.401879872383543	0.131722062396384	0.018079121813336	0.0806394245851552	-0.070389327891398	4	0.0400128202258693	0.087045634614293	0.0435228173071465	0.393370283221691	0.627275069845203	-0.126863977721742	0.0601488471884748	0.126985651835936	0.0125513168336309	4	0.0182054595340748	0.107501145669172	0.0537505728345859	0.746372504901898
A8MU27	0.00269662702976528	NA	0.135219608788137	-0.0545392762404932	3	0.0277923198591362	0.097336806814107	0.0561974316161833	0.580162942943263	0.737524212160422	-0.331685767133011	NA	0.300051847177946	0.136360115692549	3	0.0349087319124947	0.327860322068699	0.189290245202961	0.834259362339024	0.918233982056924	-0.154553298615908	NA	0.465486521966202	0.44469424673322	3	0.251875823361171	0.352131442888356	0.203303183341724	0.198745203170127	0.388183337007779	-0.197185702809424	NA	0.197939377611909	0.349149563622387	3	0.11663441280829	0.282096488480569	0.162868483561705	0.431131205010184	0.65788594622714	0.014583323144437	NA	-0.0175726294479498	0.157734460575533	3	0.0515817180906732	0.0933263353752498	0.0538819848513817	0.304342355113422
A8MXP9	-0.0258725251670055	0.023378938704314	0.0901530610600693	0.0571323598620387	4	0.0361979586148541	0.0495529160387584	0.0247764580193792	0.194324946466142	0.374535874373733	-0.176231248499032	-0.180462455676326	-0.107762601909092	-0.128104825747685	4	-0.148140282958034	0.0358961551644669	0.0179480775822334	0.00017101855633869	0.00680248810278763	-0.0873382185196534	-0.0770829536548315	-0.0434317880003335	-0.029901485713862	4	-0.0594386114721701	0.0271929591388621	0.013596479569431	0.00471076776167466	0.0345646867561711	-0.0484046319630541	-0.0312642135168508	0.0751573595687396	0.121230744650233	4	0.029179814684767	0.0821789414386911	0.0410894707193455	0.50426135970247	0.711824120011639	-0.136038539902252	-0.0233918483542284	0.101164917135573	0.100095834707588	4	0.0104575908966702	0.113826966142433	0.0569134830712164	0.860265620935229
A8MXV4	NA	NA	NA	NA	0	NA	NA	NA	NA	NA	NA	NA	NA	NA	0	NA	NA	NA	NA	NA	NA	NA	NA	NA	0	NA	NA	NA	NA	NA	NA	NA	NA	NA	0	NA	NA	NA	NA	NA	NA	NA	NA	NA	0	NA	NA	NA	NA
A8MYT4	-0.0606379433276823	-0.109493918720713	NA	-0.269949245314983	3	-0.146693702454459	0.109501932481956	0.0632209701952417	0.0392104639901627	0.137509550629074	0.0670621909186079	-0.0553982386590912	NA	-0.268703155920486	3	-0.0856797345536564	0.169918565141375	0.0981025293246878	0.344360878339752	0.597232118885592	-0.109755684627251	-0.11244489654631	NA	-0.321928094887362	3	-0.181376225353641	0.121728915986526	0.0702802224129818	0.027326597317066	0.10496607838563	-0.153088438646428	-0.0091252362476022	NA	-0.140942607716706	3	-0.101052094203579	0.0798422864933555	0.046096965599654	0.0470899919723796	0.176442395416614	0.014583323144437	-0.0261689330248021	NA	-0.0821326272894693	3	-0.0312394123899448	0.0485569365572799	0.0280343603923691	0.240384162413355
A8MZF9	-0.104944096158204	-0.114857103487806	-0.317504907853177	-0.0794569084448227	4	-0.154190753986002	0.109892416922865	0.0549462084614327	0.0309099340211967	0.117535510120852	0.0505866212182111	-0.132735366673197	-0.26146198601504	0.0093986980022496	4	-0.083553008366944	0.142248571918482	0.0711242859592411	0.284602436115203	0.54452731922548	-0.0990372472060401	-0.197225316743329	-0.189958266795931	-0.0029624138558615	4	-0.122295811150291	0.0912397194555718	0.0456198597277859	0.0364992591562402	0.128299140034086	0.0679461519630693	-0.117449459751541	-0.14388243631264	-0.0476180202327398	4	-0.0602509410834629	0.094622025073257	0.0473110125366285	0.249947500619137	0.488600466259221	-0.0511496423157392	-0.125406805967602	-0.182203331220749	-0.0659141167313409	4	-0.106168474058858	0.0599969389454974	0.0299984694727487	0.0122317738414036
B0I1T2	-0.0327589107522455	0.0343223163908956	0.0956912446014993	0.0525523717587789	4	0.0374517554997321	0.0534140984725954	0.0267070492362977	0.210382824769669	0.393800172927993	-0.00688091149008552	0.0565201842008774	0.122118081742206	0.0750217360630331	4	0.0616947726290078	0.0534103144107427	0.0267051572053714	0.0602507160355512	0.237777956364845	0.0354536759229059	0.0262514301164586	0.0521006485585161	0.0972650338827926	4	0.0527676971201683	0.0315348784606361	0.015767439230318	0.0154840074534431	0.0742512509127274	0.0691100850967052	0.0341588614811978	0.15007306634665	0.103900866112316	4	0.0893107197592174	0.0495133929548468	0.0247566964774234	0.0112641558943979	0.0701863352281567	-0.0708081680862075	0.00680838942147076	0.104417894930661	0.0630337404860435	4	0.0258629641879918	0.075852770525745	0.0379263852628725	0.520726482068756
B0QY34	NA	NA	NA	NA	0	NA	NA	NA	NA	NA	NA	NA	NA	NA	0	NA	NA	NA	NA	NA	NA	NA	NA	NA	0	NA	NA	NA	NA	NA	NA	NA	NA	NA	0	NA	NA	NA	NA	NA	NA	NA	NA	NA	0	NA	NA	NA	NA
B0QYK0	0.114127011386999	0.140545165145523	0.0790125034548689	0.203752470288953	4	0.134359287569086	0.0526823512531393	0.0263411756265697	0.00221980343331182	0.0193944097656116	0.039497442556405	-0.00494921597173337	0.204981737787629	0.28177096841538	4	0.13032523319692	0.135472344710501	0.0677361723552503	0.102693229663262	0.325069773059729	-0.000997369580606922	0.157731578531504	0.227517453514315	0.307951552118049	4	0.173050803645815	0.131265980802116	0.0656329904010578	0.0387138716515724	0.133142245736864	-0.0867764428355729	0.135351852894886	0.170781963178759	0.235713799834282	4	0.113767793268089	0.1400063169437	0.0700031584718499	0.155249411127379	0.373959338516389	0.0833924810630883	0.08609729922611	0.0897213837239588	0.23593521304993	4	0.123786594265772	0.074810691318087	0.0374053456590435	0.016218284588096
B0QZ18	0.0490895325142166	0.023378938704314	0.0161524796162924	0.080941619969172	4	0.0423906427009988	0.0293310930809954	0.0146655465404977	0.0276757778461309	0.10753711623246	0.0648762889233249	0.0862998463942204	0.0265008161146076	0.0418201756946269	4	0.0548742817816949	0.0262238409198643	0.0131119204599321	0.00578083505030212	0.0551276478140799	0.0217694740245553	0.0153713254513945	0.0504490226873578	0.0205683021221378	4	0.0270395310713613	0.0158514103000237	0.00792570515001186	0.0142900623218985	0.0707708282183338	-0.0221389772692486	0.0570732534291996	-0.00967605934904048	0.0155296982936044	4	0.0101969787761287	0.0349589031125368	0.0174794515562684	0.580894527616392	0.762502890570713	0.0412816445352248	0.00136425073134289	-0.00700338773776249	0.0468538134306089	4	0.0206240802398535	0.0273797485100862	0.0136898742550431	0.182650071562513
B1AJY5	NA	NA	NA	NA	0	NA	NA	NA	NA	NA	NA	NA	NA	NA	0	NA	NA	NA	NA	NA	NA	NA	NA	NA	0	NA	NA	NA	NA	NA	NA	NA	NA	NA	0	NA	NA	NA	NA	NA	NA	NA	NA	NA	0	NA	NA	NA	NA
B1AK88	-0.0286231361830402	-0.0738047271944245	0.0550492601041532	0.0387245179034915	4	-0.00216352134245499	0.059938044978883	0.0299690224894415	0.944795505168325	0.969489752927307	-0.0655351292108957	-0.120151031073206	0.07808531367954	0.0156306517137642	4	-0.0229925487226993	0.0874797647592662	0.0437398823796331	0.617973284083823	0.802462731007473	-0.0150334292674683	-0.0414306441359049	0.100790141473106	0.022026306329999	4	0.0165880935999328	0.0618752876374379	0.0309376438187189	0.611120646216365	0.763395749385153	-0.019662246977036	-0.0785079581897067	0.0436925900273976	0.00156051398761693	4	-0.0132292752879321	0.0508642840767958	0.0254321420383979	0.621566246082076	0.790157595418888	-0.048981805633029	-0.0656200837435258	0.0847890881817281	0.0291183318915976	4	-0.000173617325807294	0.0701003062963208	0.0350501531481604	0.996208363305844
B1AKJ5	0.00134894356801885	-0.0338882619685365	-0.0178296198129425	-0.00476530587138674	4	-0.0137835610212117	0.015608664399599	0.00780433219979952	0.127804440741101	0.286187277303961	0.0637820946798321	-0.00329759010057504	-0.0110551885089958	0.00627259701553003	4	0.0139254782714478	0.0339848818749008	0.0169924409374504	0.443822253942479	0.678985158738924	-0.0170497748659729	-0.0620245788628148	-0.0900322008624725	-0.0481444479618765	4	-0.0543127506382842	0.0303420980388556	0.0151710490194278	0.0116427348560199	0.0630752463615557	-0.0122574657552846	-0.00546821263951319	-0.0671141958585371	0.0536379636020732	4	-0.00780047766281542	0.0493899565844986	0.0246949782922493	0.762797943203126	0.881811924398872	0.0331192745818646	-0.0247797224784713	-0.114458724584915	-0.0527787145422069	4	-0.0397244717559321	0.0613329131655556	0.0306664565827778	0.242795521293705
B1AKR6	0.201223062652171	-0.118892616722963	-0.129698386847162	0.123050916126317	4	0.0189207438020909	0.168480856064359	0.0842404280321794	0.829740834711836	0.904973334241645	0.00456910925345266	-0.18607242401891	0.143640535206084	0.0140751852117228	4	-0.00594689858691266	0.135810008862216	0.0679050044311078	0.933062828599538	0.964677701804992	0.178870435109284	-0.264580584545094	-0.221536983990964	0.230612928141416	4	-0.0191585513213395	0.259993766477358	0.129996883238679	0.887662105517265	0.936236751482051	-0.119551478927193	-0.0499764737790214	0.0076943917900007	0.241008099503795	4	0.0197936346468953	0.156383247020873	0.0781916235104366	0.808608137211062	0.909517777934317	-0.0796320184732137	0.0403765636446262	-0.230566352782148	0	4	-0.0674554519026839	0.119626385505801	0.0598131927529005	0.302486353886087
B1ALA9	-0.0833356786141334	0.0184884423572422	0.0479248256707719	0.161841170298344	4	0.0362296899280561	0.10087227802334	0.0504361390116702	0.499558408422798	0.66987185118489	-0.087248340686313	-0.0708834861565099	-0.0302062888539074	0.0479139336073013	4	-0.0351060455223572	0.0603190648507152	0.0301595324253576	0.288607838443522	0.549409002276301	-0.0652637653812305	-0.0654856641874756	0.00853163362111692	0.135484356113283	4	0.0033166400414234	0.0947497236668432	0.0473748618334216	0.946461967962897	0.968897571673498	-0.00979762706748027	-0.0518611181239644	-0.0630786826233803	0.0789882961468286	4	-0.0114372829169991	0.064499081225517	0.0322495406127585	0.734984428457976	0.867574356590575	-0.0360427499255308	-0.00410050974546824	-0.0353619428914778	0.181395936809436	4	0.0264726835617399	0.104351385549914	0.0521756927749568	0.629995916278927
B1AMU7	NA	NA	NA	NA	0	NA	NA	NA	NA	NA	NA	NA	NA	NA	0	NA	NA	NA	NA	NA	NA	NA	NA	NA	0	NA	NA	NA	NA	NA	NA	NA	NA	NA	0	NA	NA	NA	NA	NA	NA	NA	NA	NA	0	NA	NA	NA	NA
B1APR7	NA	NA	NA	NA	0	NA	NA	NA	NA	NA	NA	NA	NA	NA	0	NA	NA	NA	NA	NA	NA	NA	NA	NA	0	NA	NA	NA	NA	NA	NA	NA	NA	NA	0	NA	NA	NA	NA	NA	NA	NA	NA	NA	0	NA	NA	NA	NA
B1AXG1	0.157122382741671	0.150637903833972	NA	-0.0203621609224054	3	0.0957993752177459	0.100651075381766	0.0581109254658877	0.105868929745432	0.255905958354792	0.123813728489881	0.098657052914203	NA	-0.116132184081609	3	0.0354461991074914	0.131871980606842	0.0761363235019295	0.601885165185875	0.793047643020366	0.262702025912755	0.0615845032287394	NA	-0.164386817900882	3	0.0532999037468706	0.213664915390779	0.123359496417245	0.627579524024802	0.775939836861749	0.198127142958812	0.0054475648396704	NA	-0.179323699444562	3	0.00808366945130663	0.188739228549331	0.108968644409599	0.932789097948842	0.967348694030651	0.208264447839358	0.0575281470293391	NA	-0.309723955300236	3	-0.0146437868105132	0.266429329227123	0.153823044949291	0.913836306549989
B2R5W2	-0.0452378500339366	0.00742383305843797	0.0677852480316148	0.120865014131034	4	0.0377090612967876	0.0721500165142869	0.0360750082571434	0.336158495249429	0.522203047861779	-0.305999123469362	-0.278932032714002	-0.211421303515445	-0.184138860662013	4	-0.245122830090206	0.0568736104543225	0.0284368052271612	0.000134174572364818	0.00596484900380653	-0.134714551523673	-0.153598384343071	-0.14574163344876	-0.104299668108451	4	-0.134588559355989	0.0216271227458321	0.010813561372916	1.64333004225627e-05	0.000856514951334602	-0.0893712187884404	0.0288188367259991	0.0933504763347092	0.139772804659638	4	0.0431427247329764	0.0993701995281079	0.0496850997640539	0.418589617858704	0.648935602695364	-0.131443965825002	0.101445263559546	0.0913617421052143	0.171480467944354	4	0.0582108769460279	0.131361018670027	0.0656805093350137	0.409583490832827
B2WTI3	NA	-0.2192945136808	-0.0343692959628737	0.152240946061348	3	-0.0338076211941086	0.185768366710702	0.107253416527341	0.721818025541561	0.835716542019203	NA	-0.145430439521564	0.109048787164056	0.292075976807118	3	0.0852314414832036	0.219723497943785	0.12685742068513	0.458410245154166	0.686337103783464	NA	-0.216334139691034	0.0847422002412355	0.185785241524737	3	0.0180644340249796	0.20918757747063	0.120774504163794	0.865134670321973	0.922505152868898	NA	0.185806567551402	0.0567318850985553	0.233059346388304	3	0.158532599679421	0.0912729170884408	0.0526964432507337	0.01561322460864	0.0865593060081753	NA	0.105256877509565	0.00870669535089913	0.354611008185934	3	0.156191527015466	0.178488661543769	0.103050476789591	0.129807506440907
B3KS98	0.0723801825004357	0.0749306524167146	0.0776138653997231	-0.0312596154786036	4	0.0484162712095674	0.0531602228525358	0.0265801114262679	0.118370375868042	0.273911621414621	0.196501217059821	0.233641562469407	0.0736072085603883	-0.0221713809986203	4	0.120394651772749	0.117091432371814	0.0585457161859071	0.0854788294142731	0.293400863352105	0.0138912562717738	-0.0121934229108084	0.0847422002412355	-0.101121924442866	4	-0.00367047271016623	0.076799828967214	0.038399914483607	0.926962358612101	0.957037981586196	0.099047369250809	0.200130188098072	0.0879165902840811	-0.00469169532472198	4	0.0956006130770601	0.0837772911017376	0.0418886455508688	0.0626056265208085	0.209354877181863	0.112736442645233	0.0535881490205099	0.0293908495226369	-0.0644487077268422	4	0.0328166833653843	0.0736906017315027	0.0368453008657514	0.407404154405772
B4DDD6	NA	0.172816588748536	0.157897667695904	0.121958379125305	3	0.150890878523248	0.0261430811574046	0.0150937149436738	7.23873810060525e-05	0.00202617641464164	NA	0.0453919028140143	0.272964242454134	0.0942875955887625	3	0.13754791361897	0.119795174274157	0.0691637761148024	0.0634014090380456	0.246237804649246	NA	0.0991676860368956	0.182986293543943	0.0132560967022669	3	0.0984700254277019	0.0848672491466689	0.0489981291402123	0.0614675735888252	0.181284365813677	NA	-0.0823551472452275	0.174204728819548	-0.0835647166391313	3	0.00276162164506323	0.148475317857081	0.0857222647328009	0.970774858755231	0.985113258817409	NA	0.12040342126343	0.311410222973363	-0.134984509555204	3	0.098943044893863	0.223969808507208	0.129309029231985	0.402378248615381
B4DDF4	0.196519896169442	0.0391595213948926	0.0970724749998598	0.268376627682988	4	0.150282130061796	0.102084512262757	0.0510422561313787	0.0258041977578574	0.103319324267553	0.0615912134070218	-0.129128627192463	0.388040766900826	0.491922941893383	4	0.203106573752192	0.287531086007619	0.14376554300381	0.207437416364567	0.464506155311176	0.198987151430651	0.0825848018412914	0.108747663252025	0.375663260944699	4	0.191495719367167	0.132517462587938	0.066258731293969	0.0276891996858527	0.105421222481527	0.0230061155281018	0.0216679172980009	0.179323699444562	0.289080729356943	4	0.128269615406902	0.130270309118147	0.0651351545590737	0.096445900396781	0.27740814167409	0.143392470799254	0.0912314506975465	0.146052383638624	0.289633945648436	4	0.167577562695965	0.0851953469782205	0.0425976734891102	0.00767771240604245
B4DF77	NA	NA	NA	NA	0	NA	NA	NA	NA	NA	NA	NA	NA	NA	0	NA	NA	NA	NA	NA	NA	NA	NA	NA	0	NA	NA	NA	NA	NA	NA	NA	NA	NA	0	NA	NA	NA	NA	NA	NA	NA	NA	NA	0	NA	NA	NA	NA
B4DFG0	-0.15365351694674	-0.06729142023575	-0.0977437019841632	-0.057011761920014	4	-0.0939251002716668	0.0434127974145453	0.0217063987072727	0.00494444702117188	0.0347606124302386	-0.239656628640666	0.0277293055200495	-0.0528753642036228	-0.046310734584038	4	-0.0777783554770693	0.113939767699933	0.0569698838499663	0.221144348014931	0.478882065937778	-0.264031775414401	-0.0805803978910586	-0.0918549364692903	-0.0775093672209154	4	-0.128494119248916	0.0905686766811187	0.0452843383405594	0.0296643034058661	0.110435176469591	-0.207014320177532	-0.0689346314829059	-0.0792889098046393	-0.0573331750659516	4	-0.103142759132757	0.0698260250225021	0.034913012511251	0.025471198564453	0.117198528554553	-0.170972330011639	-0.0656200837435258	-0.129665137207004	-0.0791702134336078	4	-0.111356941098944	0.0483633132256793	0.0241816566128397	0.00367261689311706
B4DJL6	NA	NA	NA	NA	0	NA	NA	NA	NA	NA	NA	NA	NA	NA	0	NA	NA	NA	NA	NA	NA	NA	NA	NA	0	NA	NA	NA	NA	NA	NA	NA	NA	NA	0	NA	NA	NA	NA	NA	NA	NA	NA	NA	0	NA	NA	NA	NA
B4DJV5	-0.0286231361830402	0.0866599449988217	-0.120037446453938	-0.115080818175544	4	-0.044270363953425	0.0968544487999241	0.0484272243999621	0.39588116021719	0.575534519625316	0.0505866212182111	0.107855989760668	-0.178999825823067	-0.307074966793005	4	-0.0819080454092983	0.194672530195415	0.0973362650977077	0.432323273990177	0.670211926806311	-0.014026312269579	-0.00663817907763781	-0.11576247595589	-0.138095520081955	4	-0.0686306218462654	0.067998718967036	0.033999359483518	0.0900767151478387	0.23135251477648	0.11491377470983	0.117015793885482	0.0076943917900007	-0.301002256032814	4	-0.0153445739118755	0.197161194326221	0.0985805971631103	0.881409651954324	0.944858644630469	0.147179074130239	0.0270428731615245	-0.0533733508757964	-0.0955392858406192	4	0.00632732764383707	0.106785339619352	0.0533926698096762	0.909535011557844
B4DL54	-0.147661005565048	0.122426307955123	-0.0328578290452742	-0.159555447316149	4	-0.054411993492837	0.131004950286074	0.0655024751430371	0.437949520100156	0.615558568599783	0.0350377943657052	0.428560943378589	-0.0269967323780173	-0.0874628412503395	4	0.0872847910289844	0.232949323818392	0.116474661909196	0.481959872575314	0.703507819794869	0.175343061613959	0.153768128124161	-0.0647527924141147	-0.15282537619224	4	0.0278832552829413	0.162099190329045	0.0810495951645223	0.7425621763534	0.849003577578037	0.193865116104652	0.214312995240397	-0.180572245641821	0.108252890652023	4	0.0839646890888128	0.182243876300143	0.0911219381500715	0.392357093723707	0.626828664132195	-0.0576727658970735	-0.0528213252168692	-0.112569143383697	-0.215638327769517	4	-0.109675390566789	0.0756597109549216	0.0378298554774608	0.0273638901855949
B4DLN1	0.318414927368483	0.169511444024864	-0.0449941365000003	0.140419914972842	4	0.145838037466547	0.149208453489802	0.0746042267449012	0.0983988640159046	0.24421984065688	0.11855417092968	-0.203034416097628	-0.0759063328589638	0.264866732177575	4	0.0261200385376657	0.206934125665323	0.103467062832661	0.809120614169578	0.905613058249499	0.30931056633665	-0.18588034314932	-0.134426320220926	0.293536494231138	4	0.0706350992993856	0.26739569207345	0.133697846036725	0.616239698914942	0.766556963154384	-0.179108323607648	-0.0294062672962684	-0.0311946216035943	0.26719203130745	4	0.00687070469998485	0.187190081486473	0.0935950407432363	0.943866859957163	0.970183447007992	0.314791221408209	0.233850919669802	-0.176270375467008	0.148918313292262	4	0.130322519725816	0.215322888097878	0.107661444048939	0.271609403103693
B4DLR8	-0.193223582945491	-0.164044653115338	0.114909160145641	-0.0545392762404932	4	-0.0742245880389204	0.139508053628991	0.0697540268144954	0.328225561851998	0.514048491601489	-0.282152381514994	-0.466448029461766	0.166249343298914	0.0202870141449858	4	-0.140516013383215	0.286504879309899	0.143252439654949	0.364524234643739	0.611447801396604	-0.155663491083844	-0.234400324406341	0.111918422859969	-0.0208657878632226	4	-0.0747527951233597	0.152516477253884	0.076258238626942	0.364815082811399	0.565556920686594	-0.176347183930591	-0.322838025564571	-0.00386263963239891	-0.108597647303558	4	-0.15291137410778	0.133670659569656	0.066835329784828	0.0621242316296396	0.208436794912764	-0.16861690901351	-0.201838610093648	0.0897213837239588	-0.0112491411329594	4	-0.0729958191290397	0.136666745482212	0.0683333727411061	0.326498655148809
B4DP31	NA	0	0.685252713325811	0.619048123821127	3	0.434766945715646	0.377971539580766	0.218221970122973	0.0630655009805554	0.186823315970185	NA	0.451625133187612	0.599052960386338	1.01951199664534	3	0.690063363406431	0.294679559038924	0.170133322735803	0.00468257967741638	0.0493199313849221	NA	0.0305806007794831	0.56138194918852	0.802060622388091	3	0.464674390785365	0.394727272714376	0.227895897158132	0.0588676526502057	0.176369587672519	NA	0.143610003897195	0.55113762307289	0.539494548011385	3	0.411414058327157	0.231998165889445	0.13394420352777	0.0144255331736839	0.0827483620190633	NA	0.268257042518675	0.759150673955991	0.663112444641304	3	0.56350672037199	0.260163630388338	0.150205542038057	0.00649476140172935
B4DR61	-0.063455707975162	-0.06989321542403	-0.0465183786289901	-0.00834964322042558	4	-0.0470542363121519	0.0276222127368418	0.0138111063684209	0.0143718340105812	0.0694026425143563	-0.171069543383253	-0.158238215822184	-0.0627007940596963	-0.00472241024240316	4	-0.0991827408768841	0.0793913261482895	0.0396956630741448	0.0466177863120469	0.2030627781287	-0.129251860253048	-0.135297567600127	-0.0845777707703644	-0.0512074959084363	4	-0.100083673632994	0.0396657501781182	0.0198328750890591	0.00234206942111079	0.021585597134201	-0.10766650977434	-0.101746501557828	-0.0470485728044314	-0.0524674198941356	4	-0.0772322510076835	0.0318932797345096	0.0159466398672548	0.00287152163781341	0.0295031938895429	-0.126863977721742	-0.0770928681874745	-0.0479462784914684	-0.0673810157300002	4	-0.0798210350326713	0.0336215978997342	0.0168107989498671	0.0031645799929663
B4DY09	0.0267421009964163	-0.016217235641481	0.0550492601041532	0.0571323598620387	4	0.0306766213302818	0.0341976894639002	0.0170988447319501	0.122957030631696	0.279505690646837	-0.0994539552897755	-0.121942086599194	-0.0414963020731324	-0.0237681659329498	4	-0.0716651274737629	0.0465627480617432	0.0232813740308716	0.0217124826834143	0.12896123949716	-0.014026312269579	-0.0829167466460153	-0.0683371297631535	-0.0435620352975779	4	-0.0522105559940814	0.0301980678462066	0.0150990339231033	0.0135023294294169	0.0684858084985359	0.00365702360808914	-0.044337267742152	0.0788143831768287	0.0863602848031811	4	0.0311236059614867	0.0626478452067756	0.0313239226033878	0.358780807032799	0.598562019679994	0.00835136943292236	-0.0220053080832659	0.0632187777595097	0.0723889055377464	4	0.0304884361617281	0.0449909898507563	0.0224954949253781	0.224114423353199
B4E0Y9	-0.320579151319344	NA	0.655562764359825	-0.228948782733823	3	0.0353449434355528	0.539074800149125	0.311234980979441	0.897326689922958	0.944614320480139	0.289298586186566	NA	0.659067963488151	-0.15410003428063	3	0.264755505131362	0.407139190289493	0.235061921111285	0.236043133657781	0.494970081350348	0.0662528718285885	NA	0.705827082357302	-0.00890555322189196	3	0.254391466988	0.392756646451607	0.22675815555485	0.237648389212473	0.430702086684237	0.17776942991582	NA	0.446043876278177	-0.0951927188919706	3	0.176206862434009	0.270621680950908	0.156243500345556	0.23552397425636	0.476014116966972	0.0249104613063319	NA	0.515795277977712	-0.202684749918962	3	0.112673663121694	0.367192282484619	0.211998563136848	0.553199438138428
B4E1N1	NA	NA	NA	NA	0	NA	NA	NA	NA	NA	NA	NA	NA	NA	0	NA	NA	NA	NA	NA	NA	NA	NA	NA	0	NA	NA	NA	NA	NA	NA	NA	NA	NA	0	NA	NA	NA	NA	NA	NA	NA	NA	NA	0	NA	NA	NA	NA
B5MDE0	0.012095325032015	-0.139241262114765	-0.137798885618279	-0.154251415456222	4	-0.104799059539313	0.0782838563381847	0.0391419281690923	0.0366624198121363	0.131005313347622	-0.0265569611139551	0.0955776599822312	-0.280445089382613	-0.166393310472059	4	-0.0944544252465991	0.163798646112942	0.0818993230564711	0.292652591955909	0.554295080494377	-0.104386511921407	-0.162218866915416	-0.20368898265804	-0.199637665083935	4	-0.167483006644699	0.0460205518287873	0.0230102759143936	0.000342400871864631	0.0066351143310691	-0.00611571513908812	-0.0499764737790214	-0.184950686152395	-0.10020498232696	4	-0.0853119643493661	0.0767470295838775	0.0383735147919388	0.0678983245997061	0.220105569305894	-0.0952048223936747	-0.134367673539224	-0.251206118841185	-0.0673810157300002	4	-0.137039907626021	0.0809188898317716	0.0404594449158858	0.0147283331993571
B5MDF5	0.0490895325142166	-0.0313505391666366	0.0929248103101231	0.17980245369759	4	0.0726165643388232	0.0880604329799554	0.0440302164899777	0.150192101520452	0.319162621241901	-0.0335660196333184	-0.216366346332509	0.0706140642484048	0.111845966973067	4	-0.0168680836860889	0.146399921343511	0.0731999606717553	0.825407131981434	0.914663173749648	-0.0170497748659729	-0.0471217562137607	0.0766507878876878	0.147557188413858	4	0.040009111305453	0.0889882125494664	0.0444941062747332	0.403188383088174	0.599822087635605	0.0048739743684712	-0.109576615980252	0.0641303374197156	0.195374870697968	4	0.0387006416264758	0.126917127849158	0.0634585639245792	0.564323243259214	0.752672847243666	-0.0554951125917034	-0.0542378153069876	0.0548358660801003	0.167744527036909	4	0.0282118663045796	0.10643152585721	0.053215762928605	0.615050688703929
B8ZWD1	0.693676015921791	0.680550763181062	-0.345374964006559	0.229341914498905	4	0.3145484323988	0.490052538184033	0.245026269092017	0.246579700185467	0.432874816295392	0.289298586186566	-0.622502217294592	-0.624032065399749	0.159057850979	4	-0.199544461382194	0.492153814993552	0.246076907496776	0.448383919680222	0.682166376040922	1.00497653146403	-0.759586388527353	-0.507500526396079	0.419469745594105	4	0.0393398405336749	0.819404350728363	0.409702175364182	0.9266310508551	0.957022776472486	-0.658192411718781	-0.3927723163789	-0.347222115051272	0.304334034872624	4	-0.273463202069082	0.408877020539942	0.204438510269971	0.22948649815365	0.470011980974583	-0.0381912165041076	0.692332598237807	-0.921813646642519	0.125997698150345	4	-0.0354186416896184	0.668675530173838	0.334337765086919	0.919085609619765
B8ZZA8	0.212914334420111	0.151754973220706	NA	-0.349546071812567	3	0.0050410786094169	0.30860031156638	0.178170472954852	0.97433133669862	0.984097437634457	0.251355701292469	0.266872092036041	NA	-0.450032920635048	3	0.0227316242311541	0.409499604099121	0.236424706659673	0.912982323136162	0.954826623965127	0.0547800873846398	0.146805780736292	NA	-0.401781402576577	3	-0.0667318448185485	0.293787060087065	0.169618038225696	0.657985863661473	0.796469615081979	0.299789117618114	0.074455331657436	NA	-0.312590230308026	3	0.0205514063225079	0.309727850404991	0.178821457806846	0.896103208669436	0.950268816721167	0.169692327457309	0.199793044872999	NA	-0.371804001526932	3	-0.00077287639887467	0.321674657313222	0.185718949991269	0.996223699812991
B8ZZW5	NA	NA	NA	NA	0	NA	NA	NA	NA	NA	NA	NA	NA	NA	0	NA	NA	NA	NA	NA	NA	NA	NA	NA	0	NA	NA	NA	NA	NA	NA	NA	NA	NA	0	NA	NA	NA	NA	NA	NA	NA	NA	NA	0	NA	NA	NA	NA
B9ZVN9	0.114127011386999	NA	0.362405996923242	0.246487041619788	3	0.24100668331001	0.124230187193488	0.0717243320176379	0.0101590983854025	0.0539410677732593	0.049481531129027	NA	0.945491704053412	0.259625327535423	3	0.418199520905954	0.468580717271136	0.270535203253558	0.123928657879402	0.358160929989897	0.273465367389928	NA	0.992278152622264	0.4843695203872	3	0.583371013466464	0.369491443442619	0.213325984334859	0.0222347684339439	0.0930965442878287	-0.433875113457841	NA	0.718720586596821	0.384265150484027	3	0.223036874541002	0.592971440854274	0.342352220998976	0.471398436153135	0.689089686891164	-0.133739423812664	NA	1.08807915811591	0.59890169167903	3	0.517747141994093	0.61493878352842	0.355035072205275	0.141795661620785
C9J0E4	0.481952312414051	-0.186455900535597	NA	-0.591518862118531	3	-0.0986741500800258	0.542092535848699	0.312977271497933	0.721765266457655	0.835716542019203	0.256153494343708	-0.19170429209824	NA	-0.24243750122668	3	-0.0593294329937373	0.274391276661942	0.158419877444057	0.673152760213445	0.829492515258478	0.190275198381533	-0.159750611324666	NA	0.207732703443256	3	0.0794190968333745	0.207310885136422	0.119690995339453	0.463687842105797	0.653769512592546	-0.0358375225257605	-0.0349872995595682	NA	-0.48106163460884	3	-0.18396215223139	0.257296050380655	0.148549943948699	0.1989072439955	0.433523142464597	0.294447358465255	0.0270428731615245	NA	-0.227068908545921	3	0.0314737743602863	0.260786366310421	0.150565078790306	0.812645449366707
C9J840	NA	0.0331104767220874	0.0248872895939009	-0.0933472962282625	3	-0.0117831766374247	0.0707561616052458	0.0408510889496133	0.744307204869612	0.847472949273384	NA	0.00329006993418476	-0.202342009604583	-0.0958360222753445	3	-0.0982959873152474	0.10283810871879	0.0593736097517453	0.104743906506931	0.328806676397147	NA	0.00330767062937953	-0.189958266795931	-0.0884804850419186	3	-0.0917103604028234	0.0966734436821006	0.0558144387333489	0.106751726011403	0.257139814926272	NA	0.145255976740755	-0.0813280550782379	-0.285695003244966	3	-0.0739223605274831	0.215570916455577	0.124459926645082	0.509492439027199	0.714376457875336	NA	0.158811482866521	0.0765309371794193	-0.180292137876474	3	0.0183500940564888	0.176880112732108	0.102121780700174	0.838432496724911
C9J8E1	0.00404305273728199	-0.0212440527163137	0.0161524796162924	-0.0155451446246295	4	-0.00414841624684219	0.0173337122488432	0.0086668561244216	0.649128761024911	0.783990100365387	-0.136702884312395	-0.138162439057524	-0.0447383147652844	0.0402927059480332	4	-0.0698277330467926	0.0854359563191204	0.0427179781595602	0.15324606970344	0.397003577401691	-0.0746829177136244	-0.0970148559767036	-0.0593929285121046	-0.0029624138558615	4	-0.0585132790145735	0.0401268864451612	0.0200634432225806	0.0267559802748884	0.103299269950176	-0.00856927872517024	-0.131331168620773	-0.0510394330004658	-0.0508491414957529	4	-0.0604472554605405	0.0513045954088077	0.0256522977044039	0.0565610309689575	0.196025637139174	-0.129152154317012	-0.158539045914298	-0.024662054234269	0.031861098955136	4	-0.0701230388776108	0.0890117824861791	0.0445058912430896	0.166189999766927
C9JA28	-0.0948198788844972	0.148401166888432	0.0321261158240331	-0.0410158321407476	4	0.0111728929218052	0.105243792255074	0.0526218961275372	0.8388836466629	0.911497154678709	0.126960283806744	0.145565795813908	-0.136874350150391	-0.031778708672661	4	0.0259682551994	0.134604838343964	0.0673024191719822	0.712921936584303	0.849156917647861	-0.00699611020205004	0.0710724843516675	-0.00686182050225903	-0.0527414620719734	4	0.00111827289384627	0.0513938642735733	0.0256969321367867	0.966700916360568	0.980705334668727	0.0145728010872726	0.0657904705303085	-0.0854150126014809	-0.0109711178210032	4	-0.00400571470122574	0.062962050334604	0.031481025167302	0.902906001832857	0.955813313643692	-0.0620379584584754	-0.0584956493101445	-0.0122783297784367	-0.0397618288753724	4	-0.0431434416056072	0.0227799874251326	0.0113899937125663	0.00909640247210519
C9JAZ1	-0.143182900445896	-0.297939008133823	0.0102997533708546	-0.228948782733823	4	-0.164942734485672	0.132876136488363	0.0664380682441814	0.0476337630692478	0.155856743796049	-0.0811840398660582	-0.0502732064812237	0.306427001347174	-0.403558490835547	4	-0.0571471839589137	0.290294105900222	0.145147052950111	0.707399129599708	0.849022637277878	-0.209983132365905	-0.141372082009812	0.0636093879783314	-0.0790715709911987	4	-0.091704349347146	0.116531395299359	0.0582656976496796	0.166575602495978	0.346326029123343	-0.0283494691710606	-0.364390515009077	0.0455625773804438	-0.410879873805188	4	-0.18951432015122	0.231530882617604	0.115765441308802	0.152733883321804	0.37085504359985	-0.14991071448381	-0.297566811793223	-0.196142522178623	-0.188249659655393	4	-0.207967427027762	0.0630535495871095	0.0315267747935547	0.000583323894201216
C9JBI3	-0.256302265568872	-0.299464862364783	-0.347252251247229	-0.221996022092056	4	-0.281253850318235	0.054226382485932	0.027113191242966	4.69782605279587e-05	0.00152704603845182	-0.072736616913996	-0.167456745851563	-0.371136106355538	-0.309020611107974	4	-0.230087520057268	0.135162935201888	0.0675814676009439	0.0144141672590081	0.0981397018558143	-0.197353011549176	-0.229215430987766	-0.217551636039785	-0.329345566449845	4	-0.243366411256643	0.0588112827679716	0.0294056413839858	0.000168458826997158	0.00423459243073588	-0.0383422020453019	-0.236714361093661	-0.287151196196855	-0.357893592175235	4	-0.230025337877763	0.137114090863442	0.0685570454317209	0.0153196262746034	0.085287716810545	-0.16157363200939	-0.326370840440601	-0.272145456533547	-0.45960671361183	4	-0.304924160648842	0.123841928508248	0.0619209642541241	0.00264504156072153
C9JCC6	-0.290556668219892	0.0160369633631459	-0.00295634333141221	-0.162214793766639	4	-0.109922710488699	0.144534576945994	0.0722672884729968	0.17906330409421	0.355889788479157	-0.0787654390634148	0.209631399199965	0.116324117967232	0.166078278656773	4	0.103317089190139	0.127233288763785	0.0636166443818927	0.155489448554878	0.399515929023853	-0.288177862746103	0.248798688591868	0.200964034472999	0.115135710721481	4	0.069180142760061	0.244572057853264	0.122286028926632	0.592092703167806	0.750166069436831	-0.183259966878115	-0.141329095264681	-0.112266232250912	-0.202492863898743	4	-0.159837039573113	0.0407172305224067	0.0203586152612034	0.00022579207385034	0.00593538642825719	-0.147589402573689	-0.123918724308193	0.149205816677499	0.115692689758607	4	-0.001652405111444	0.155750585241918	0.0778752926209588	0.98375931035813
C9JFR7	0.648760295978861	0.391903865361312	0.271133251011378	1.0416162708077	4	0.588353420789813	0.340742945986541	0.17037147299327	0.0135771238488141	0.0668003330763307	0.504585111723688	0.0437951178796848	0.639002340434045	0.9625873286381	4	0.53749247466888	0.381151703111949	0.190575851555975	0.0303397934831704	0.160387545903963	0.559819043808847	0.535938707263021	0.182986293543943	0.852920785194235	4	0.532916207452512	0.274218144629926	0.137109072314963	0.00810662395292573	0.0486236591462192	0.122782018043169	0.541250452941504	0.574639057452395	0.865070419913891	4	0.52593548708774	0.305587853276837	0.152793926638418	0.0137650982076022	0.0801770556485192	0.59261976619992	0.454086225700522	0.102792322881619	0.6035183197494	4	0.438254158632865	0.233756483933123	0.116878241966561	0.00951352921285788
C9JG97	-0.0135592637281541	0.081979665011239	0.124422963144815	NA	3	0.0642811214759667	0.0706732096742348	0.0408031966299143	0.118426228643371	0.273911621414621	0.141554144214019	0.127588054884852	-0.0205989611798667	NA	3	0.0828477459730016	0.0898592167135127	0.0518802429587155	0.114582342688085	0.343807418905746	0.00497653146402599	0.190988394459805	-0.128801771027048	NA	3	0.0223877182989276	0.1606044817425	0.0927250407670927	0.784485018808118	0.871528858912376	0.0679461519630693	0.172953965479339	0.0915414541028352	NA	3	0.110813857181748	0.055092915744168	0.0318079097353368	0.00879001830800717	0.0607291274409565	0.118534287183345	0.119147265293005	0.164870411840791	NA	3	0.134183988105714	0.0265769897990211	0.0153442322147148	0.000138227647689122
C9JJ19	0.045170937870892	-0.00995824516979849	-0.0343692959628737	0.193388237203092	4	0.0485579084853281	0.102124690391408	0.0510623451957041	0.3783455352763	0.562033687046808	-0.114238320786577	-0.0639806259018219	0.154989227282747	0.111845966973067	4	0.0221540618918538	0.131290879977167	0.0656454399885836	0.747248132273638	0.869488492634029	0.0129034472356548	0.00880365838423153	-0.00342683068693803	0.100028818331272	4	0.0295772733160551	0.0474771897145237	0.0237385948572619	0.259223611333487	0.45746233336902	-0.0521962111254285	0.0306010420680086	0.107741568640331	0.0108883161427362	4	0.0242586789314118	0.0659134160825456	0.0329567080412728	0.489449400709261	0.70282457491401	-0.117747391044763	-0.0973924297980053	-0.137328873905174	0.0856490636013238	4	-0.0667049077866545	0.102869717429945	0.0514348587149724	0.242308597606345
C9JKF1	-0.0190188541259431	0.0427768113155672	-0.0328578290452742	NA	3	-0.00303329061855006	0.0402716201079014	0.0232508307099992	0.882189046553414	0.936067914261485	0.111158427683852	0.0940354951738257	0.142215651099256	NA	3	0.115803191318978	0.0244235998200374	0.0141009719306783	0.000186883078494116	0.00701882800668577	-0.300404165079363	0.0456312071528344	0.0170131103762079	NA	3	-0.0792532825167734	0.19205606866079	0.110883622940808	0.431964788095566	0.624545087709661	-0.0308411710700424	-0.0238467419543678	0.00385232549560655	NA	3	-0.0169451958429346	0.0183475660520368	0.0105929721991179	0.114098449004463	0.306322923037737	0.0207884726711451	0.112850026831795	-0.123943933248354	NA	3	0.00323152208486229	0.119369299939418	0.068917897453	0.957477650973972
C9JLU1	-0.0382917844210735	0.0463850542324158	-0.216252761713241	0.0559887252077094	4	-0.0380426916735474	0.126133319349287	0.0630666596746437	0.56845208197091	0.729384823343828	0.123813728489881	-0.0198995574377049	-0.211421303515445	0.246437895303099	4	0.0347326907099574	0.196918761891428	0.0984593809457141	0.736328825436333	0.865408805935312	-0.0831074382416341	0.181286306510401	-0.00171239787568619	0.258093664563523	4	0.0886400337391509	0.158070259577265	0.0790351297886325	0.304932448198805	0.503721743663927	0.14833677624728	0.0447799772377702	-0.0272582070444239	0.18304992116121	4	0.0872271169004591	0.0963068868187997	0.0481534434093999	0.120035175308976	0.315261802744599	0.018723053505361	0.00680838942147076	-0.0515620574289735	0.0935470488786503	4	0.0168791085941271	0.0596293713745248	0.0298146856872624	0.591831066611563
C9JLV4	NA	0.0439805619410053	0.172384001595984	0.0421939264874471	3	0.0861861633414787	0.0746548625768833	0.0431020050050781	0.0623906138355844	0.185794909405224	NA	0.594810286677503	0.322871752420771	-0.0221713809986203	3	0.298503552699885	0.309211822914859	0.178523529196509	0.102134424137203	0.323979395767853	NA	0.110458846801831	0.11508222904214	-0.301724524164181	3	-0.0253944827734034	0.239320000725194	0.138171466841152	0.834814263907245	0.903823391341939	NA	0.450971985649893	0.311086535239936	-0.156520749920307	3	0.201845923656507	0.31813831796403	0.183677243516068	0.246068968949722	0.485066967534795	NA	0.105256877509565	0.246639967583125	-0.24355703133449	3	0.0361132712527334	0.252307160325681	0.145669606932502	0.778905017085906
C9JPE1	NA	NA	NA	NA	0	NA	NA	NA	NA	NA	NA	NA	NA	NA	0	NA	NA	NA	NA	NA	NA	NA	NA	NA	0	NA	NA	NA	NA	NA	NA	NA	NA	NA	0	NA	NA	NA	NA	NA	NA	NA	NA	NA	0	NA	NA	NA	NA
C9JQ41	0.36212015109761	-0.0024831246076519	-0.124859829910781	0.574218342360348	4	0.202248884734881	0.322921768679441	0.16146088433972	0.256953533273485	0.442352238659307	0.314357283786989	-0.134542123378828	-0.0158191830665319	0.594361198723406	4	0.189589294016259	0.329980385433084	0.164990192716542	0.294253368970785	0.555260882895557	0.262702025912755	-0.0256139386731299	-0.31212105669735	0.401658469477644	4	0.0816563750049796	0.317146892409072	0.158573446204536	0.625005921946901	0.773390463383333	0.14833677624728	0.246873857024558	-0.055041363557962	0.711447230800679	4	0.262904125128639	0.324377813846381	0.162188906923191	0.156149997336636	0.375243723915855	0.554633401990019	-0.0670492022763258	-0.388501776436896	0.43036323050768	4	0.132361413446119	0.43900712656278	0.21950356328139	0.568583221605857
C9JRZ6	-0.129831385752105	-0.141976229836004	-0.235247225734098	-0.0619694817159816	4	-0.142256080759547	0.071292221156373	0.0356461105781865	0.00719411689302439	0.044012605847731	-0.168495599719427	-0.147253175128382	-0.168352581623559	-0.152352371994363	4	-0.159113432116432	0.0109508687987539	0.00547543439937694	1.10027705197443e-07	8.31534382029678e-05	-0.171296562450484	-0.195960349506751	-0.227535724612408	-0.161074083860047	4	-0.188966680107422	0.0295900466887307	0.0147950233443654	1.41413303381955e-05	0.000791652622451201	-0.226874742538375	-0.143337021880927	-0.21373910957702	-0.153044374645713	4	-0.184248812160509	0.0421668870354779	0.021083443517739	0.000124228728686079	0.00389413888682636	-0.152235767430054	-0.172315548867306	-0.240849326044009	-0.148893835687928	4	-0.178573619507324	0.0427862871038102	0.0213931435519051	0.000160612146859804
C9JS59	0.0826121051113917	-0.171010842608159	-0.426403198048791	-0.355620586222251	4	-0.217605630441952	0.227263661306733	0.113631830653366	0.103983668792509	0.25289029023311	0.651660604561267	0.558368290709443	-0.100997313821794	-0.289681245899536	4	0.204837583887345	0.470006606386494	0.235003303193247	0.416915914381904	0.654809074056247	-0.13362035728018	0.0305806007794831	-0.176357000686844	0.0205683021221378	4	-0.0647071137663509	0.105777088696432	0.0528885443482159	0.267019803622631	0.465371168905396	-0.067462967778739	0.228357730678674	-0.389547524524794	0.092230872927681	4	-0.0341054721742944	0.266019786255146	0.133009893127573	0.806197288134724	0.907685065933434	-0.332963149911735	0.0377196659491587	0.377436389337077	-0.0397618288753724	4	0.0106077691247821	0.292048149207492	0.146024074603746	0.944450531417943
C9JSZ1	NA	NA	NA	NA	0	NA	NA	NA	NA	NA	NA	NA	NA	NA	0	NA	NA	NA	NA	NA	NA	NA	NA	NA	0	NA	NA	NA	NA	NA	NA	NA	NA	NA	0	NA	NA	NA	NA	NA	NA	NA	NA	NA	0	NA	NA	NA	NA
C9JVE2	0.203568908763967	0.00742383305843797	-0.0268277469502544	0.167147152891561	4	0.0878280369409278	0.114452692333595	0.0572263461667975	0.175745829317886	0.352236543311956	0.259024530198463	0.109383459507262	-0.0221957461141962	0.078002512001273	4	0.1060536888982	0.116398670906961	0.0581993354534804	0.118251270083908	0.348075549623812	0.224811737878259	0.166609729877957	0	0.00147892892591325	4	0.0982250991705322	0.115048723562922	0.0575243617814611	0.138589447910581	0.304695200751771	0.163673086629685	0.04654258593703	0.0987639725210735	0.0596429464274016	4	0.0921556478787977	0.0525865672817556	0.0262932836408778	0.0127499774547473	0.0761722961377492	0.204635024438667	0.102716920795594	0.19569840191995	0.155221053945244	4	0.164567850274864	0.0465022930268921	0.0232511465134461	0.000398797347152068
C9JVN9	-0.334125683157291	-0.699819604208962	NA	0.316924110044319	3	-0.239007059107312	0.515002533585283	0.297336851398802	0.380799555870128	0.563739988930164	-0.0277227753518499	-0.531613076128223	NA	0.330077165231674	3	-0.0764195620827993	0.432904205098725	0.24993735934707	0.729728403070697	0.861033943201685	-0.228553880059685	-0.350635231402625	NA	0.267958284473079	3	-0.10374360899641	0.327639569180879	0.189162793463754	0.541099148280176	0.71500310092966	-0.105038649228301	-0.147361278439722	NA	0.54271365319426	3	0.0967712418420787	0.38677677918638	0.223305677579553	0.626579910383022	0.793600516374951	-0.0686106123819615	-0.230376365569144	NA	0.475387155193676	3	0.0588000590808566	0.369730504843511	0.213464006499017	0.755322899164549
C9JW51	0.463474671374579	0.596904385998743	-0.243964442835207	0.244480511336826	4	0.265223781468735	0.369241731929738	0.184620865964869	0.200860426260641	0.382368431099444	0.300489554059081	0.228027956005881	0	0.60989089701701	4	0.284602101770493	0.251836058944657	0.125918029472329	0.0645288828883596	0.248181695892508	0.129596333605456	0.346661240974911	0.126101230002293	1.03940838455824	4	0.410441797285224	0.431814257886187	0.215907128943093	0.106021126601716	0.255787602328003	0.338915448907935	0.895322183432588	0.0951572330403402	0.492546866499759	4	0.455485432970156	0.335785094845671	0.167892547422835	0.0349683440543995	0.145205088017101	0.553207109198723	0.427946088236732	0.146052383638624	0.651567270359397	4	0.444693212858369	0.219118653112914	0.109559326556457	0.00665857761735154
C9JZR2	0.0386162012847082	0.066663036433114	0.0607235841974285	0.0865530429941067	4	0.0631389662273393	0.0197301641523603	0.00986508207618017	0.000685525883299757	0.00874407065491631	0	0.00821114931924022	0.0721114126349071	0.189695383517	4	0.0675044863677869	0.0876059256250999	0.04380296281255	0.174227822501587	0.425262103903733	-0.0715363623967605	0.133785882906472	-0.0845777707703644	0.106915203916512	4	0.0211467384139647	0.115197852359645	0.0575989261798226	0.726117334412886	0.840050785277518	-0.0258620633119659	0.10353256452186	-0.0331668639351994	0.0046764872094732	4	0.0122950311210419	0.0629949137366714	0.0314974568683357	0.709759681790771	0.851254415007928	0.208264447839358	0.0835233555622837	0.00174554775182933	0.0454972594605238	4	0.0847576526534986	0.0888591394291434	0.0444295697145717	0.105044456519102
D1MQ08	0.198873395942415	0.0487855457028581	-0.00147741440549896	0.192347707016703	4	0.109632308564119	0.101412536875724	0.0507062684378619	0.073861964384699	0.204286110096016	-0.0277227753518499	-0.274941172517968	0.0943871260086405	0.12199052437861	4	-0.0215715743706418	0.181006893910878	0.0905034469554388	0.819540629576522	0.912848682096473	-0.0241292600052422	-0.0923001621046516	0.181477987038666	-0.00593092321778078	4	0.0147794104277479	0.117185398482348	0.0585926992411738	0.809274103168501	0.886068675798037	0.199190685241322	-0.223909291459247	-0.21597758177302	-0.115347110097767	4	-0.089010824522178	0.198386713261956	0.0991933566309782	0.404100714274871	0.638242664186486	-0.233603318282043	0.225703366521692	0.175735299432314	0.0167109402079275	4	0.0461365719699723	0.206688443370082	0.103344221685041	0.670942972403101
D3DQV9	0.00134894356801885	0.00247885806842421	-0.0449941365000003	-0.0971589101782817	4	-0.0345813112604597	0.0472187186700146	0.0236093593350073	0.193338765987486	0.373372490136183	0.0461611728374158	-0.130930869826449	0.032666188920322	0.0675427403562339	4	0.00385980807188076	0.0910004684076534	0.0455002342038267	0.935155881569037	0.965623056034402	0.0256925085041246	-0.0482626776183302	-0.0103050083917385	-0.0193653248669311	4	-0.0130601255932188	0.030486786904266	0.015243393452133	0.424462363912531	0.619280755843428	-0.0932721541283439	-0.123382415505282	-0.0977458145122003	-0.0736719118806994	4	-0.0970180740066315	0.0204506178443405	0.0102253089221703	7.80961265542313e-05	0.00284439265751134	-0.0381912165041076	-0.0471692316373544	-0.0105178719139993	-0.0673810157300002	4	-0.0408148339463654	0.0236003507138512	0.0118001753569256	0.0134865121150577
D3DSM0	0.0800609195820594	0.0654780712405101	0.26131060853283	0.372185008658479	4	0.19475865200347	0.148074658352668	0.074037329176334	0.0390310369567028	0.137039285389213	-0.0655351292108957	-0.0795587681054231	0.214504511906135	0.292075976807118	4	0.0903716478492337	0.190854983044823	0.0954274915224116	0.38019152766979	0.625649966328674	0.0595715067369397	0.04349070966687	0.463005532462447	0.369949609750306	4	0.234004339654141	0.21419999936165	0.107099999680825	0.0715747493076179	0.201035443723463	0.0503735225151194	0.00181814143897935	0.312640326495016	0.263294608745652	4	0.157031649798692	0.153810560972813	0.0769052804864063	0.0872165981994316	0.261563270195319	0.145287014789031	0.11158727398016	0.390819556188882	0.381740334129603	4	0.257358544771919	0.149545937550092	0.0747729687750458	0.0137694305986625
D3DTX6	-0.00540842260729001	-0.0842875710700256	-0.110440769997817	0.0118448534068764	4	-0.0470729775670642	0.0594632912919323	0.0297316456459661	0.164450792106976	0.339341122552484	0.0372693416642879	0.115477217419936	-0.0692884540944561	0.0433460299255871	4	0.0317010337288387	0.0761225713227076	0.0380612856613538	0.436795767606546	0.672661031826077	0.139586707458747	-0.0380267218940753	-0.113909302880413	-0.0148732764815303	4	-0.00680564844931784	0.106366906993228	0.0531834534966141	0.902357545139489	0.943231970593595	-0.0484046319630541	0.0535715647176471	-0.0792889098046393	0.089298564924523	4	0.00379414696861915	0.0804493705226778	0.0402246852613389	0.927923003915793	0.96561488496986	0.0392453773787061	0.0483180242892217	-0.0734491276404559	0.0856490636013238	4	0.0249408344071989	0.0685983155284666	0.0342991577642333	0.494512998717114
D3YTB1	-0.0203869860832758	0.00123996143506536	0.0378911386437953	0.0673844798844485	4	0.0215321484700083	0.0388974701491119	0.019448735074556	0.310640454430667	0.495766361064239	-0.0823948624641057	-0.118362196323393	-0.0190039416244867	-0.0142138592197009	4	-0.0584937149079215	0.0505821040001431	0.0252910520000715	0.0600362374449019	0.237777956364845	0.00298797837057208	-0.00663817907763781	-0.0665438479401028	-0.0837683576925977	4	-0.0384906015849416	0.0430972127633853	0.0215486063816926	0.124301309398035	0.282316197077581	-0.023378938704314	-0.0765882040263411	0.015347964333436	0.0201561962431293	4	-0.0161157455385225	0.0447783095186455	0.0223891547593228	0.498713889493591	0.707135125675013	-0.0576727658970735	-0.0220053080832659	-0.0211129871531984	-0.0070204276777725	4	-0.0269528722028276	0.0215993584892409	0.0107996792446204	0.0467990787447853
D6RAN1	-0.3239538781	-0.210655595406928	-0.0434715030701262	0.0954861677641144	4	-0.120648702203235	0.184485624961612	0.0922428124808062	0.238764969808198	0.425581664935249	-0.46430220527015	-0.415037499278844	0.0600888843856941	0.204773568700218	4	-0.15361931286577	0.336144799627529	0.168072399813765	0.395956800177842	0.636470940092749	-0.204228457640098	-0.234400324406341	0.588950209197325	0.812208577764174	4	0.240632501228765	0.53900584261171	0.269502921305855	0.406307892863527	0.602683395547813	-0.248461604746521	-0.161535238464462	0.113101432542341	0.00156051398761693	4	-0.0738337241702565	0.162085878725471	0.0810429393627356	0.397395622446812	0.631280592042413	-0.354218709951786	-0.0528213252168692	-0.148901356069921	-0.0325806540637962	4	-0.147130511325593	0.147087899212838	0.0735439496064189	0.092352135259163
D6RB85	-0.0876315479149634	0	-0.0882937006793506	0.0235932492823289	4	-0.0380829998279963	0.058396482992639	0.0291982414963195	0.239930640671168	0.426674447593431	-0.40856885710991	-0.0434680285761093	-0.0792266911505751	-0.0758214348149434	4	-0.151771252912884	0.171955116463056	0.0859775582315281	0.127963632917948	0.363565848036613	-0.26882877082609	-0.277901963042928	-0.282677278804869	-0.239260437217528	4	-0.267167112472854	0.0194708834647848	0.0097354417323924	1.54771950330539e-07	5.1986178427691e-05	-0.169467366215354	0.262124475156585	-0.0630786826233803	0.0819416135361761	4	0.0278800099635066	0.187094091387405	0.0935470456937026	0.775729675598267	0.887932907737055	0.0952017833527216	0.0417031798676566	-0.218322757027401	-0.1442424774163	4	-0.0564150678058308	0.148932438586208	0.0744662192931042	0.47738343779822
D6RBQ9	0.175163823034531	0.0808072187533838	0.221337279739727	0.125233511158166	4	0.150635458171452	0.0608868628091515	0.0304434314045757	0.00258300298776445	0.0216299668476785	0.0328027899823968	-0.0502732064812237	-0.0334230015374503	0.132064246391719	4	0.0202927070888605	0.0826928144466836	0.0413464072233418	0.64100210946934	0.813789468045413	0.17269186018016	0.170538105459397	0.152516416717105	0.166138614155584	4	0.165471249128061	0.00905691845909365	0.00452845922954683	2.80258959836367e-08	1.69444567117067e-05	0.17776942991582	0.0570732534291996	0.222943383741803	0.0641303374197155	4	0.130479101126635	0.082818266258402	0.041409133129201	0.0197902508900436	0.100210935411393	0.0893092154295206	0.0925121387895382	0.275786313242642	0.165248514232839	4	0.155714045423635	0.0873924825970085	0.0436962412985042	0.0118760835753337
D6RBW1	0.0240900873068186	0.023378938704314	0.0393288019823868	0.0559887252077094	4	0.0356966383003072	0.0153991250116423	0.00769956250582116	0.00355460738044143	0.0276330621701957	-0.00803092752618079	0.0341771153180878	0.0646090814230763	0.097228870900885	4	0.0469960350289671	0.0448175877441573	0.0224087938720786	0.0807883019222103	0.283980275245165	0.0393397255206941	0.0359738595497017	0.103978419104153	0.102787318293835	4	0.070519830617096	0.0379749521629133	0.0189874760814566	0.00992230957131779	0.0563121451679411	-0.0408512375314191	0.0054475648396704	0.0751573595687396	0.0596429464274016	4	0.0248491583260982	0.0530235376927253	0.0265117688463627	0.384787432230208	0.619059290916402	-0.0381912165041076	-0.0499925105048816	0.0798398722099947	0.101402032208213	4	0.0232645443523047	0.0784211735001602	0.0392105867500801	0.574633505375206
D6RBZ0	0.0672368792244761	0.0866599449988217	0.106704237323917	0.045655011812108	4	0.0765640183398307	0.0261579990577796	0.0130789995288898	0.00109722116188344	0.0118460699013344	-0.117958206923691	-0.138162439057524	0.119224008473026	-0.00157241981875358	4	-0.0346172643317356	0.11892072273604	0.0594603613680199	0.581638744211353	0.781513957970871	0.0364261700890787	0.0348968195288774	0.0863550512095366	0.0263914988914009	4	0.0460173849297234	0.0272516733470607	0.0136258366735304	0.0149089650547428	0.0730466796766409	0.080698059371917	0.079629377995373	0.148333831608114	0.0491177665646909	4	0.0894447588850236	0.0419008180117885	0.0209504090058943	0.00526679539525008	0.0440036423016882	0.0833924810630883	0.150227636645826	0.120573663321702	0.0670505274174361	4	0.105311077112013	0.0373931293771545	0.0186965646885772	0.00134008963110127
D6RCB9	0.358966718058735	0.064292131970367	0.194489720874805	-0.176929474363989	4	0.11020477413498	0.226230343060094	0.113115171530047	0.36754843390334	0.551960894818195	0.172338278914561	0.0971181780580135	0.114871983933319	-0.257387842692652	4	0.0317351495533104	0.195403870891897	0.0977019354459483	0.75634694596684	0.87527787421975	0.145908385984532	0.305275023785854	-0.0434317880003335	-0.249778309131527	4	0.0394933281596315	0.239804593570875	0.119902296785438	0.753063462056831	0.853765615322867	0.368524926656998	0.391190757324476	0.174204728819548	-0.125530882083859	4	0.202097382679291	0.239146197781614	0.119573098890807	0.141955064143562	0.352080577152247	0.226275855823676	0.286276886978968	0.19569840191995	-0.181880134779666	4	0.131592752485732	0.21234159339887	0.106170796699435	0.261460199074521
D6RCP9	-0.202511351337838	-0.223633449405137	-0.284756325513465	0.0329235650098464	4	-0.169494390311648	0.139378979498268	0.0696894897491339	0.0510139911845956	0.161990856461169	-0.0945593109310624	-0.136351145610702	-0.350929963155757	0.00470700267752762	4	-0.144283354254998	0.149929258705033	0.0749646293525163	0.102597392988825	0.325069773059729	-0.0455785725211016	0.275490458677359	-0.191911814881686	-0.0193653248669311	4	0.00465868660190996	0.195866235094505	0.0979331175472526	0.963602754023264	0.979479194825934	-0.0221389772692486	0.192190184342257	-0.061065151185732	-0.0156986863579879	4	0.023321842382322	0.114348836732632	0.0571744183663158	0.697498299671723	0.844886828628787	-0.286253115401741	-0.0528213252168692	-0.212239704975557	0.0055918482443539	4	-0.136430574337453	0.135836535529018	0.0679182677645091	0.0913129755803249
D6REB4	-0.224418204549086	-0.0935229618089296	0.132528012781871	0.250491749370688	4	0.0162696489486358	0.214756497523437	0.107378248761718	0.884533895967659	0.937837508099412	-0.0823948624641057	-0.00494921597173337	0.0109711178210032	0.380444559454303	4	0.0760178997098668	0.207008012758474	0.103504006379237	0.490373679219687	0.709621652599863	0.116780430436373	0.0153713254513945	0.0911828137990648	0.036525876025114	4	0.0649651114279865	0.0470479504312756	0.0235239752156378	0.0327821622353675	0.118541239757794	0.0349688295167964	-0.105656246608909	-0.0998112336779845	0.202176840115047	4	0.00791954733623752	0.144882644017426	0.0724413220087128	0.916510491154155	0.962017782902434	0	-0.041539195064488	-0.123943933248354	0.0777076029567283	4	-0.0219438813390283	0.0840633474630353	0.0420316737315177	0.620320423342244
D6RER5	-0.0466310853338031	-0.0364304565309897	-0.0993247378036435	-0.0410158321407476	4	-0.055850527952296	0.0292814640926331	0.0146407320463166	0.00881469231045858	0.050182325526396	-0.0137947987202622	-0.130930869826449	-0.0993109371939075	-0.128104825747685	4	-0.093035357872076	0.0547247248017417	0.0273623624008709	0.0144937585808194	0.0984598476175665	-0.0302251636137061	-0.0482626776183302	-0.106520323651042	-0.12674204351575	4	-0.077937552099707	0.0460286990273784	0.0230143495136892	0.0147395398057021	0.0725694280661848	0.0012200381622561	-0.0462145549828223	-0.124829693714824	-0.103556191826597	4	-0.0683451005904969	0.0570362451576216	0.0285181225788108	0.0535460347622767	0.190211119960473	-0.0907382707117836	-0.0613412025815449	-0.116350783926123	-0.10003600129683	4	-0.0921165646290706	0.0230870632270615	0.0115435316135308	0.000206319928700888
D6REX3	-0.0662789868426892	-0.044084029074425	-0.020822764124926	0.0118448534068764	4	-0.0298352316587909	0.0334147152305983	0.0167073576152991	0.124381917034084	0.281863969410821	-0.0524250468846343	-0.130930869826449	0.00157241981875358	0.00783649423196628	4	-0.0434867506650908	0.0642670766584506	0.0321335383292253	0.2247161518513	0.483871865667069	0.00298797837057208	-0.0574226769038061	0.0304806064547617	0.0161854277409385	4	-0.00194216608438345	0.0386533277659755	0.0193266638829878	0.923227897525222	0.954670965471252	-0.0687425200053113	-0.101746501557828	0.019159578283455	0.00778574496659536	4	-0.0358859245782721	0.0587491661480473	0.0293745830740237	0.267650936766993	0.50919369530939	-0.0730090762794785	-0.0641923794796684	0.0311012172877398	-0.00280407287670262	4	-0.0272260778370274	0.0498701583660677	0.0249350791830339	0.316778594098628
D6RGX2	NA	0.0702121035141849	-0.154137622433027	-0.0619694817159816	3	-0.0486316668782746	0.112768004600733	0.0651066378122103	0.412876187315646	0.593215168372243	NA	0.0244945619207486	-0.0643448911503214	-0.166393310472059	3	-0.068747879900544	0.0955200747964226	0.0551485408967278	0.196418190685347	0.45525836176127	NA	-0.0011042442490023	-0.128801771027048	-0.206450877467426	3	-0.112118964247826	0.103684844481053	0.0598624728720204	0.0753474670456517	0.207813464213644	NA	-0.147361278439722	-0.103950964038908	-0.566346822553809	3	-0.27255302167748	0.255357028342896	0.147430449053234	0.0781432383302259	0.242035870360935	NA	-0.261124815825162	-0.304135570777984	-0.0183246582130808	3	-0.194528348272076	0.154104790818481	0.0889724424624608	0.0474839437856263
D6RHI9	0.379860566821749	0.351639995147585	0.136563526017027	NA	3	0.289354695995454	0.133071245518844	0.0768287194217032	0.006390660179335	0.04110418238751	0.441956875755779	-0.0657032470508297	0.225311266862718	NA	3	0.200521631855889	0.254736323626675	0.147072085018237	0.164114081419802	0.413775536390377	0.476282250389615	0.383512598116102	0.31953016835022	NA	3	0.393108338951979	0.0788153696150902	0.0455040748635522	0.000146573940943435	0.00388678090764916	0.190660312770735	-0.141329095264681	0.0115262533810276	NA	3	0.0202858236290273	0.166167955139141	0.0959371136302729	0.810538033099999	0.910537522876736	0.10107038144186	0.189057769734641	0.268554744011566	NA	3	0.186227631729356	0.0837780411993019	0.0483692746385965	0.00583091408236336
E5RGY0	0.045170937870892	-0.0137103800309062	0.0915396013310318	0.045655011812108	4	0.0421637927457814	0.0431320653702053	0.0215660326851026	0.0983607794019313	0.24421984065688	0.0973220726200478	0.147053877473317	0.0234082210592259	-0.0126276083277493	4	0.0637891407062102	0.0719435244157734	0.0359717622078867	0.126542726321367	0.363291764560205	-0.0767844403589122	0.123690005170965	0.0271255001963813	-0.0103951713623785	4	0.0159089734115138	0.0837188514592117	0.0418594257296059	0.716992792936767	0.836331116104127	0.216101589969568	0.0447799772377702	-0.0116190832668334	-0.0188590272513159	4	0.0576008641722973	0.109429385663444	0.054714692831722	0.332993924422218	0.574238809770887	0.0774513812153031	-0.0303446089959955	-0.075288127304237	-0.0659141167313409	4	-0.0235238679540676	0.0700452120434801	0.03502260602174	0.526790564093497
E5RK69	-0.307158635557022	-0.0711958746916662	-0.0898644085545772	-0.107372723040281	4	-0.143897910460887	0.109838303896037	0.0549191519480184	0.0395768367845294	0.138313037687436	-0.219535032719893	0.0147465853691864	-0.205966873423337	-0.178792239196535	4	-0.147386889992644	0.109408300643743	0.0547041503218717	0.0358490533375733	0.175358718834117	-0.310260360824376	-0.0289886654537866	-0.241630554498194	-0.164386817900882	4	-0.18631659966931	0.120629852221594	0.0603149261107971	0.021413472095563	0.0908818284593317	-0.276276982614646	0.00906788051836732	-0.137503523749935	-0.151309323274966	4	-0.139005487280295	0.116794443299895	0.0583972216499474	0.0547424209645713	0.19220248382799	-0.0511496423157392	-0.107650335163444	-0.30845502023486	-0.130377709342044	4	-0.149408176764022	0.111140322768711	0.0555701613843554	0.0361180018863414
E7EM64	-0.0369065754419822	0.0221578679239389	-0.0465183786289901	0.0352467459319747	4	-0.00650508505376468	0.0411909963650062	0.0205954981825031	0.762814691346375	0.860764767428179	-0.109293345796563	-0.0182307370770864	-0.0643448911503214	-0.085794020889721	4	-0.069415748728423	0.0387474281350533	0.0193737140675266	0.0116013339426619	0.0861691216429166	-0.00499375729090223	-0.0585717769572989	-0.0683371297631535	-0.0635251377852142	4	-0.0488569504491422	0.029512656459858	0.014756328229929	0.0161862891606071	0.0765745729773322	-0.0333371838741124	0.0377079285622684	-0.0590544260645854	-0.0720296862726535	4	-0.0316783419122707	0.0489723978795712	0.0244861989397856	0.24332877711688	0.482665940435911	-0.0210924084595593	-0.0303446089959955	-0.003497444236227	-0.0042081557523858	4	-0.0147856543610419	0.0131803310685506	0.00659016553427532	0.0660200347883324
E7EMN6	-0.0733614509483247	-0.2192945136808	-0.0757892233428544	NA	3	-0.122815062657326	0.0835624728693632	0.0482448162052776	0.0286638608525488	0.110383250136631	-0.0536119618350764	-0.19170429209824	0.0884804850419186	NA	3	-0.0522785896304659	0.140097147531087	0.0808851258397717	0.47472354347603	0.698116749493552	-0.242640518004338	-0.288648344506924	0.277790659995539	NA	3	-0.0844994008385742	0.314594574268633	0.181631262139591	0.602140774032814	0.759505483389787	-0.00122107078037506	-0.238859632925218	0.0696543838913527	NA	3	-0.0568087732714135	0.161594304182567	0.0932965150193153	0.499385368739102	0.707755260055465	-0.0232187095679472	0.00680838942147076	0.13655051587147	NA	3	0.0400467319083311	0.0849125544771395	0.0490242861849552	0.373730241546103
E7ENQ1	0.107878863721822	0.182686832772597	0.106704237323917	0.0305966370200913	4	0.106966642709607	0.0620935475873664	0.0310467737936832	0.0137110014026483	0.0672862942211134	0.269503048002728	0.211054877402167	0.057067532410457	0.0479139336073013	4	0.146384847855663	0.111077161949468	0.0555385809747341	0.0387610878600835	0.182799951015651	0.216254802704443	0.128746775300383	-0.0224212947077952	0.0263914988914009	4	0.087242945547108	0.106607959868781	0.0533039799343905	0.152807120080766	0.325995712070682	0.183154636022651	0.115337265434485	0.0229611484433112	0.180296685514751	4	0.1254374338538	0.0751536545854116	0.0375768272927058	0.0156474091653297	0.0865593060081753	0.0912760801389215	0.0323911463519673	0.0379224831437538	-0.0211646099980423	4	0.0351062749091501	0.0459592662390355	0.0229796331195177	0.177443415443191
E7EPI8	NA	NA	NA	NA	0	NA	NA	NA	NA	NA	NA	NA	NA	NA	0	NA	NA	NA	NA	NA	NA	NA	NA	NA	0	NA	NA	NA	NA	NA	NA	NA	NA	NA	0	NA	NA	NA	NA	NA	NA	NA	NA	NA	0	NA	NA	NA	NA
E7EPT4	0.157122382741671	0.100610368356452	0.0578892118891147	0.0932580668719972	4	0.102220007464809	0.0410787762097153	0.0205393881048577	0.00250978907901319	0.0211929954912203	0.189495400111078	-0.0882865324179551	0.147906763177111	0.470532611870547	4	0.179912060685195	0.229133854312946	0.114566927156473	0.167384171553617	0.415778431065394	0.2552031609972	0.0208216343171547	-0.0189491028009902	0.427193561584782	4	0.171067313524536	0.209252238832344	0.104626119416172	0.153159038850699	0.326516060963091	0.103598461481996	0.0761820763769042	0.0229611484433112	0.146841388329271	4	0.0873957686578705	0.0518776642035101	0.025938832101755	0.0150554259676016	0.0844388732839696	0.367679436125479	0.308489720562558	0.0814914980811531	0.321367716150121	4	0.269757092729828	0.128058049822694	0.0640290249113472	0.00560422999113937
E7EQ64	-0.202511351337838	0.239480528673882	-0.0118618965533042	NA	3	0.00836909359424684	0.221689366503755	0.127992415427421	0.940737638617182	0.967954350421968	-0.137961231571315	0.382559875761669	0.32161340516185	NA	3	0.188737349784068	0.284565616974993	0.164294035562624	0.228113472482467	0.488376081667492	-0.189372852690619	0.0594675622166381	0.255025768863445	NA	3	0.0417068261298214	0.2227310407634	0.128593826341634	0.714229371121247	0.834602005759385	-0.312196556869589	0.752527236770074	0.365994876342325	NA	3	0.26877518541427	0.53897860849362	0.311179444701241	0.349230912013888	0.591559812243046	0.424949382699383	0.317279968873831	0.130180990995742	NA	3	0.290803447522986	0.149157151434382	0.0861159215321981	0.00996052650902726
E7EQ69	-0.017652018362037	-0.0492090612522922	-0.145945124319919	-0.0594884922122266	4	-0.0680736740366188	0.0548813419802245	0.0274406709901123	0.0477562472234229	0.15593688785156	0.0483755939028579	-0.113008961829186	-0.0925850740055942	-0.0221713809986203	4	-0.0448474557326357	0.0733248763163161	0.036662438158158	0.267092938708526	0.52635068690735	-0.0221030025922583	-0.107679590674923	-0.0451965527963989	-0.0916304754655682	4	-0.066652405382287	0.0398000704239626	0.0199000352119813	0.015431581957001	0.0742165266785772	-0.00734197534116807	-0.0349872995595682	-0.049042622936519	-0.0540875155622975	4	-0.0363648533498882	0.0209685772839674	0.0104842886419837	0.0133280314580039	0.0782342506748463	0.0433150416877531	-0.0303446089959955	-0.112569143383697	-0.0268613401675663	4	-0.0316150127148763	0.0637502827534159	0.031875141376708	0.359574623684904
E7EQB2	-0.266006528890721	-0.422084149028739	-0.304680867495593	-0.348031431210569	4	-0.335200744156405	0.0669145098119405	0.0334572549059703	5.73035156778566e-05	0.00178586111231093	-0.325937970522693	-0.724938510150612	-0.431386987457353	-0.380870896127652	4	-0.465783591064577	0.17805557350857	0.0890277867542852	0.00195361836770172	0.0302860939772425	-0.285744986889818	-0.243518969017264	-0.46909040303575	-0.395928676331139	4	-0.348570758818493	0.102876484440103	0.0514382422200515	0.000504732735419716	0.00887097127426629	-0.28368683475834	-0.703399093621636	-0.374466951242154	-0.419207141027799	4	-0.445190005162483	0.181137210421599	0.0905686052107994	0.00266886220263309	0.0283459591671326	-0.304238860875104	-1.0095860488292	-0.427903126049266	-0.548997003433284	4	-0.572681259796713	0.307933308921045	0.153966654460522	0.00985802152462284
E7EQL5	NA	0.257233786137651	0.168447587036814	-0.142388164171279	3	0.0944310696677285	0.209841033701143	0.121151777294384	0.394297851180816	0.574716684724979	NA	0.190997225060914	0.0914368283733308	-0.180572245641821	3	0.0339539359308078	0.192338711865933	0.111046807071383	0.729722097930208	0.861033943201685	NA	0.194851034092204	0.103978419104153	-0.117081103122526	3	0.0605827833579436	0.160430048489055	0.0926243316812604	0.469735818817425	0.659856589351801	NA	0.243804291949796	0.00385232549560655	-0.132360220473975	3	0.038432132323809	0.190451456759879	0.109957199827873	0.693459850091778	0.842662262225313	NA	0.144064897497334	-0.024662054234269	-0.650876617452497	3	-0.177157924729811	0.418836777201248	0.241815526063656	0.421290507312313
E7ES96	0.0214331896113511	-0.0326188425809705	-0.177327249804917	0.041038383741738	4	-0.0368686297581995	0.0986834831346478	0.0493417415673239	0.483180392678512	0.657541699746226	-0.103135867218168	-0.00825815100230884	-0.0142294363041394	0.0585164645669405	4	-0.0167767474894188	0.0663476214657142	0.0331738107328571	0.631088823177862	0.809410908980346	0.313328098982723	-0.0402951107904743	-0.15333478277099	0.106915203916512	4	0.0566533523344425	0.201578934645759	0.10078946732288	0.594410636671146	0.752472091564856	0.182079201726942	-0.137321606463156	-0.277767780738219	0.00623195371151458	4	-0.0566945579407297	0.196932090635377	0.0984660453176884	0.585697006628612	0.766054159985118	0.0228509391280375	-0.107650335163444	-0.212239704975557	0.102707048164126	4	-0.0485830132117094	0.139360388321812	0.0696801941609058	0.511756908999808
E7ESC6	-0.143182900445896	0.0403662927248865	-0.0465183786289901	-0.0336924913348888	4	-0.0457568694212221	0.0753992919819746	0.0376996459909873	0.270458280473761	0.458036628499821	0.0350377943657052	0.142585019875668	-0.0174106835488193	0.0585164645669405	4	0.0546821488148735	0.0666455646385195	0.0333227823192597	0.151910012154408	0.395882729950669	-0.161227304539217	0.0909000700532951	0.0404993622797528	-0.0163690724070114	4	-0.0115492361532952	0.108982677397694	0.0544913386988472	0.839165340394886	0.905029191585352	0.0760740328464695	-0.103700049643582	0.041820175694627	0.061140294813904	4	0.0188336134278545	0.0828838575672173	0.0414419287836087	0.665477147929637	0.821788161025854	0.215496017070434	-0.00821270742050462	0.0732143953949549	0.0236171048602275	4	0.0760287024762778	0.0988309041924938	0.0494154520962469	0.174832212474357
E7EST9	-0.0480256674055559	-0.105484573738568	0.1039588605851	0.0270991927838642	4	-0.00561304694379002	0.0910114384501073	0.0455057192250536	0.905859608035353	0.949809341869659	0.327181324144572	0.0325678624564307	0.103201990748684	0.079490593660682	4	0.135610442752592	0.131043149604471	0.0655215748022355	0.0839214959429794	0.290205892247187	-0.0600573539534638	0.0208216343171547	-0.0381504091642775	0.127379306476228	4	0.0124982944189102	0.0838580908514863	0.0419290454257432	0.775693284705855	0.866235314477736	0.149437650044222	-0.169697608417823	-0.0895135808151015	0.116917751779151	4	0.00178605314761217	0.155776090849994	0.0778880454249969	0.982448880714033	0.991964918636781	-0.43118069176667	0.0912314506975465	-0.0389462802405166	0.0590057386859411	4	-0.0799724456559247	0.240593771209515	0.120296885604758	0.530889544862456
E7ET15	-0.00540842260729001	0.0331104767220874	0.00589457425085348	-0.00357250295855355	4	0.00750603135177432	0.017773589585256	0.00888679479262798	0.430703123234004	0.608889072235853	-0.12417941122073	-0.045166316048135	-0.0479876292939905	0.0600247710722175	4	-0.0393271463726594	0.075674324612668	0.037837162306334	0.338688155812372	0.590798785355338	-0.130342745024033	-0.0155368659851789	-0.101003318683476	-0.0163690724070114	4	-0.0658130005249247	0.058807137177977	0.0294035685889885	0.066505483042625	0.192388588744359	-0.0147215057067656	0.0430152124417048	0.0343061220373204	0.0596429464274016	4	0.0305606937999153	0.0319655975351211	0.0159827987675606	0.104403624871052	0.287967297431743	-0.233603318282043	0.0270428731615245	0	0.0013999952975275	4	-0.0512901124557478	0.122176218014735	0.0610881090073674	0.433301546486517
E7EU96	-0.15665913270236	-0.0237640446948291	0.102584210608882	-0.0920789928139286	4	-0.0424794899005588	0.110891608661103	0.0554458043305516	0.472645283575939	0.647984894444474	-0.0775576574601087	0.065990863993881	0.0810630134794356	-0.00787929342958596	4	0.0154042316459055	0.0731530777895965	0.0365765388947982	0.688314749408985	0.838394804059258	-0.161227304539217	0.00440854442632138	0.107159666348833	-0.146260199716559	4	-0.0489798233701556	0.128183236965128	0.0640916184825642	0.473710996852645	0.662542985580488	-0.0636311061877119	0.0162813707509418	-0.0371194555606996	-0.0524674198941356	4	-0.0342341527229013	0.035387266961682	0.017693633480841	0.101164618975866	0.282643847656233	-0.106432077816929	0	0.0293908495226369	-0.155119066666906	4	-0.0580400737402995	0.0871376945387501	0.043568847269375	0.231176078043113
E7EUC7	0.0464783190576787	0.0487855457028581	0.0393288019823868	-0.0251953146583488	4	0.0273493380211437	0.0352603507133103	0.0176301753566552	0.171817004615923	0.347194388338191	-0.0126401807787703	0.0675632838126346	0.0295867959883502	0.0187365625815858	4	0.0258116154009501	0.0330960763307389	0.0165480381653695	0.169824891423963	0.41806241594026	0.0344805257741092	0.04349070966687	0.020391788831178	-0.00148044655463087	4	0.0242206444293816	0.0195942746095667	0.00979713730478335	0.0483123092406657	0.153630685929864	0.0048739743684712	0.0640512357917718	-0.00193002709839957	-0.0379678501990205	4	0.00725683321570573	0.0422727357866005	0.0211363678933002	0.74305772873324	0.87134880896965	0.035164200566889	-0.0373310393121022	0.0632187777595097	-0.0140751852117228	4	0.0117441884506434	0.0457279941550169	0.0228639970775085	0.625854557806845
E7EVA0	0.0646583351226997	-0.00497053046674661	0.0915396013310318	0.231369595845887	4	0.0956492504582181	0.0991995942780984	0.0495997971390492	0.102067531741981	0.249891103566394	-0.023065160197863	-0.0935486478233687	0.283343388234133	0.417392920276974	4	0.146030625122469	0.243915219412563	0.121957609706282	0.276310135939667	0.534411734450168	0	0.0846681163417805	0.133920734461592	0.345702063503629	4	0.14107272857675	0.147204292013861	0.0736021460069307	0.103740697475724	0.253325765325205	-0.0534622884694205	0.0377079285622684	0.212993723334198	0.265894059973034	4	0.11578335585002	0.149134100176076	0.0745670500880381	0.171473673219662	0.397824185835026	0.145287014789031	0.0796538091006319	0.110901928500859	0.305588081830777	4	0.160357708555325	0.100462232871054	0.0502311164355268	0.0187793751190278
E7EVI4	NA	NA	NA	NA	0	NA	NA	NA	NA	NA	NA	NA	NA	NA	0	NA	NA	NA	NA	NA	NA	NA	NA	NA	0	NA	NA	NA	NA	NA	NA	NA	NA	NA	0	NA	NA	NA	NA	NA	NA	NA	NA	NA	0	NA	NA	NA	NA
E7EVX8	-0.110761422753519	-0.0288172724211145	0.0873759763894957	-0.0227767138557054	4	-0.0187448581602107	0.0813354967085366	0.0406677483542683	0.661085843152011	0.794617297752894	-0.044143871800833	-0.104130810482734	0.0615971908909711	-0.082462160191973	4	-0.0422849128961421	0.0735619318760444	0.0367809659380222	0.294044767329318	0.555213823633059	-0.00699611020205004	-0.126835988851931	0.116661534115988	-0.0253765629007928	4	-0.0106367819596966	0.0998960002387942	0.0499480001193971	0.838411608920686	0.904861939938319	-0.0828930083483447	-0.0785079581897067	0.196256934224863	0.0124371032382227	4	0.0118232677312586	0.13057189266336	0.0652859463316799	0.862251959197244	0.936581706147343	-0.14991071448381	0.0108780537305176	0.184983376234329	-0.0615223476141831	4	-0.00389290803328654	0.142050207294463	0.0710251036472314	0.95806908674492
E7EVZ5	0.0633673327628243	-0.126997666360018	0.0190699629985867	0.163965905646881	4	0.0298513837620685	0.120868919875614	0.0604344599378072	0.638903671130163	0.776600642471444	0.114332675478995	0.155950277961713	0.07808531367954	0.0690416444296512	4	0.104352477887475	0.0395759025649009	0.0197879512824504	0.00187683061388945	0.0295106238482526	0.145908385984532	-0.0643310462459837	0.158662091786454	0.166138614155584	4	0.101594511420147	0.110931901171413	0.0554659505857063	0.116720080250563	0.271002152532604	0.0876064287140947	-0.101746501557828	0.0751573595687396	0.223730108071959	4	0.0711868486992415	0.133492518111959	0.0667462590559797	0.327207390106554	0.570853251362905	0.226275855823676	-0.0443514669898747	-0.0479462784914684	0.0935470488786503	4	0.0568812898052459	0.130736104434778	0.0653680522173891	0.417656465555049
E7EW05	1.29275420663011	NA	0.191906559860802	0.0329235650098464	3	0.505861443833585	0.686089690397036	0.396114067438956	0.187441095639546	0.365806605628372	0.30512695773345	NA	0.261197747354177	-0.261149761488851	3	0.101724981199592	0.315025400629916	0.181879999855252	0.533438879251489	0.748838410457278	0.671701828784976	NA	0.0136265007438804	-0.0837683576925977	3	0.200519990612086	0.410950949725698	0.237262641447864	0.358787223629743	0.56052391577918	0.0048739743684712	NA	-0.071161028921239	-0.140942607716706	3	-0.0690765540898246	0.0729306360814364	0.0421065223737879	0.107178804666472	0.293011327322424	1.22717055045135	NA	0.138138512774662	-0.0910565425937396	3	0.424750840210758	0.704301524127472	0.40662867454566	0.267121614997694
E7EW49	-0.115139863264093	0.0160369633631459	0.0132290844095263	0.0887915151901061	4	0.000729424924671361	0.0847961986325079	0.0423980993162539	0.98683154377282	0.992094370279822	0.0383838222456964	0.0707029913432019	-0.0892338645059563	0.215641379345368	4	0.0588735821070775	0.125262022942884	0.0626310114714422	0.383498946387734	0.628525430304796	0	0.0668633054624664	0.126101230002293	0.253135944767556	4	0.111525120058079	0.10754629815874	0.05377314907937	0.0834252719496503	0.22131198143601	-0.0471429833991431	-0.0785079581897067	0.0380680408335195	0.211646039872452	4	0.0310157847792804	0.130104146343848	0.0650520731719239	0.650384184508545	0.809421420465238	0.0534392589614605	0.0562160095665481	0.102792322881619	0.097479886500577	4	0.077481869477551	0.0262730765522143	0.0131365382761072	0.00105494927629245
E7EWW0	-0.126881088116796	NA	-0.136175143138615	-0.167548238069679	3	-0.143534823108363	0.0213091045861955	0.0123028172690299	3.40916896926092e-05	0.00122689497548521	-0.0265569611139551	NA	0.0062794224962812	0.137789234225349	3	0.0391705652025584	0.0869700433023906	0.0502121779120686	0.393929405104105	0.635378444218268	-0.475094853232308	NA	-0.18800736042577	-0.303549565572508	3	-0.322217259743528	0.144451269415443	0.0833989792817894	0.00574662701846208	0.0391262465693938	-0.16809533088523	NA	0.0455625773804438	-0.153044374645713	3	-0.0918590427168331	0.119248308472494	0.0688480429970022	0.17166137223989	0.397954239479439	-0.330328089743764	NA	-0.188160786517149	-0.334236353924897	3	-0.28424174339527	0.0832314924664275	0.0480537245805462	0.000875755176225972
E7EX17	0.0620751741086972	0.0499842952864836	0.0734097972254929	0.0153794285702711	4	0.0502121737977362	0.0251146210919141	0.012557310545957	0.00713000978431002	0.0437657554497406	0.0125303949561357	-0.0778195333668864	-0.0431163977412943	-0.0110430996117572	4	-0.0298621589409506	0.039272001171144	0.019636000585572	0.179129663727101	0.430452284139132	0.0776351402651267	0.0689694299837927	0.255025768863445	0.126024026864217	4	0.131913591494145	0.0858281479162523	0.0429140739581262	0.0218327576015045	0.0920286637062818	0.107002383723825	0.0341588614811978	0.0548763285200734	0.0775093672209154	4	0.068386735236503	0.0312435014782911	0.0156217507391455	0.00468003301071736	0.0410079414243437	0.0614877877350065	0.0270428731615245	0.0798398722099947	0.0576605683871918	4	0.0565077753734294	0.0218989852124249	0.0109494926062125	0.00209316153222124
E7EX90	-0.131308800157604	-0.0124585838214465	0.00736446234630783	-0.0336924913348888	4	-0.0425238532419079	0.0615183555521171	0.0307591777760586	0.21608282721258	0.400011259438842	-0.150605440823538	0.0261128403191313	-0.0350340514434356	-0.046310734584038	4	-0.05145934663297	0.0733568690486684	0.0366784345243342	0.210192977339904	0.467903807436325	-0.119470839460462	-0.0677976759657629	-0.0293908495226369	-0.0884804850419186	4	-0.0762849624976952	0.0377926033484622	0.0188963016742311	0.00682564194263916	0.0435314674949328	-0.0446229914206276	0.0288188367259991	0.00385232549560655	-0.0220263063299989	4	-0.00849453388225523	0.0317967863802048	0.0158983931901024	0.612340954935857	0.784699748525263	-0.14991071448381	-0.041539195064488	0.00696955481484174	-0.0169067759948854	4	-0.0503467826820854	0.0692674688117534	0.0346337344058767	0.196256999799732
E9PB61	0.468360199378577	0.224694359294173	0.145936055766265	0.355549007066617	4	0.298634905376408	0.142396200116116	0.0711981000580578	0.00572109872623269	0.0385186669251702	0.41303395460881	0.148540425818019	0.0525236072655089	0.404390255079335	4	0.254622060692918	0.182228737506163	0.0911143687530813	0.0313893479038801	0.163603446057637	0.427446788249387	0.184203789892695	0.108747663252025	0.331661125025932	4	0.26301484160501	0.143480221045455	0.0717401105227274	0.0105014119762546	0.058928492231091	0.302760684149405	0.308402158610715	0.250767065966123	0.320678467229425	4	0.295652093988917	0.0308441312630132	0.0154220656315066	1.30319097570996e-06	0.000207344543135327	0.512687433636289	0.199793044872999	0.141309272382605	0.343614803724852	4	0.299351138654187	0.165691170891438	0.0828455854457189	0.0111857644585146
E9PB90	-0.0244991837583122	0.0439805619410053	0.0522037068327528	-0.0239855074252823	4	0.0119248943975409	0.0418975694658151	0.0209487847329076	0.589851138722741	0.742039114589616	0.00114363465432932	0.116996643617137	0.0234082210592259	-0.015801856122893	4	0.0314366608019497	0.0592568179438077	0.0296284089719038	0.329506349639843	0.582854122271062	-0.0180590054359081	-0.0312428769137962	-0.0103050083917385	-0.029901485713862	4	-0.0223770941138262	0.0099933263917932	0.0049966631958966	0.00419953158660129	0.0321325114060304	0.0301956405774892	0.0447799772377702	0.0897301606560122	0.0155296982936044	4	0.045058869191219	0.0320857681876702	0.0160428840938351	0.0308108391382142	0.132932317223695	0.0331192745818646	0.012232061376493	0.0598714559773987	0.00279863335267339	4	0.0270053563221074	0.02530992021262	0.01265496010631	0.0767867181809982
E9PC47	NA	NA	NA	NA	0	NA	NA	NA	NA	NA	NA	NA	NA	NA	0	NA	NA	NA	NA	NA	NA	NA	NA	NA	0	NA	NA	NA	NA	NA	NA	NA	NA	NA	0	NA	NA	NA	NA	NA	NA	NA	NA	NA	0	NA	NA	NA	NA
E9PC62	-0.0190188541259431	-0.0621018641331865	-0.0680286073141049	-0.0656989841140385	4	-0.0537120774218183	0.0232569503871025	0.0116284751935512	0.00361909580209779	0.0279199083991526	0.153946733291679	-0.0115746927867733	0.0464426918733305	0.017184442968845	4	0.0514997938367704	0.0722885049689987	0.0361442524844994	0.204078741241457	0.462466292933227	0.0557396451459127	-0.0380267218940753	-0.0719303944871619	-0.0374747054186629	4	-0.0229230441634968	0.0548616775822292	0.0274308387911146	0.435350462865121	0.62693763521085	0.0562548801951294	-0.044337267742152	-0.0854150126014809	-0.0968615392525891	4	-0.0425897348502731	0.0696485103028853	0.0348242551514426	0.267185285438927	0.508627907986068	-0.0317553915224327	-0.0247797224784713	-0.0900851292323176	-0.115127091210017	4	-0.0654368336108097	0.0442119908475098	0.0221059954237549	0.0252783659936675
E9PCW1	0.120348215684038	0.0654780712405101	-0.170663519523906	-0.0807141591046853	4	-0.0163878479260107	0.133338712769883	0.0666693563849414	0.814023525881322	0.896463795533419	0.0941101342820975	-0.129128627192463	-0.0676387168753633	-0.0774787526777174	4	-0.0450339906158616	0.0966033671412596	0.0483016835706298	0.387136721572438	0.630101085588179	0.0898654290505391	-0.0608727264735727	-0.10836402363473	-0.0775093672209154	4	-0.0392201720696697	0.0882777061387545	0.0441388530693772	0.408444951513026	0.604370576810512	0.0337770119844244	0.0144813767047317	-0.14388243631264	-0.115347110097767	4	-0.0527427894303128	0.0898712055285533	0.0449356027642766	0.284975344218019	0.52657730169381	0.0714857143789141	0.0270428731615245	-0.160567417273294	-0.128845372457798	4	-0.0477210505476633	0.114186039983307	0.0570930199916536	0.435256506640197
E9PDF6	0.0147694593303405	0.332064456810824	-0.104078267774278	0.0977108328786282	4	0.0851166203113787	0.18428716439096	0.09214358219548	0.391257757730028	0.572493805236144	0.0855098403132413	0.668156436247555	-0.0286006180806071	0.101629570929931	4	0.20667380735253	0.313068294226175	0.156534147113088	0.234860109990191	0.494921612226218	-0.0559057106829964	0.208289408417008	-0.104678976826874	0.112400743000242	4	0.0400263659768449	0.145708729398706	0.0728543646993532	0.602561577024234	0.759505483389787	0.00973153801777341	0.340366498246793	-0.187144899565307	0.0819416135361761	4	0.061223687558859	0.218088925097063	0.109044462548532	0.594819930253579	0.772552792862423	0.0614877877350065	0.291862240609825	-0.172328583285633	0.0830067642530264	4	0.066007052328056	0.189845424170269	0.0949227120851347	0.512836760044309
E9PDI2	-0.259529772599268	-0.36505320399236	-0.516472983678295	-0.640737490134318	4	-0.44544836260106	0.167542475975336	0.0837712379876682	0.00179957643411106	0.0163859022901137	-0.478578578357652	-0.477870852721884	-0.43563646045871	-0.911613005850922	4	-0.575924724347292	0.224691086608185	0.112345543304093	0.00216468760557949	0.0322357173973734	-0.294278062282521	-0.443650805021683	-0.445593221727818	-0.934904971778115	4	-0.529606765202534	0.27934025682501	0.139670128412505	0.00905385497838341	0.0527356524078093	-0.361524269233157	-0.409589934439174	-0.480805269429864	-0.837728571101123	4	-0.522412011050829	0.215846658864127	0.107923329432064	0.00287907449467918	0.0295031938895429	-0.614578981487254	-0.252969367081619	-0.265831682601345	-0.633389190723656	4	-0.441692305473469	0.210697891707491	0.105348945853745	0.00573230073105768
E9PE17	NA	-0.166827093786664	0.0748125149255832	-0.255679148348344	3	-0.115897909069809	0.171030761166916	0.0987446559994253	0.219601463497154	0.404543098203471	NA	-0.134542123378828	0.0585789993280565	-0.17523880133878	3	-0.0837339751298505	0.124915138888514	0.0721197890631429	0.22388944312688	0.482751630936205	NA	0.0679167520524561	-0.106520323651042	-0.349942471056959	3	-0.129515347551848	0.209876537344101	0.121172275332203	0.257518478624845	0.456853498170719	NA	-0.0939586551653823	0.153545258253455	-0.339996387648678	3	-0.0934699281868683	0.24677118592026	0.142473410619305	0.468464615362504	0.686793662580431	NA	-0.183122303823889	0.19569840191995	-0.0659141167313409	3	-0.0177793395450934	0.193943289020637	0.111973210123586	0.856944805042123
E9PE82	-0.039678324692036	-0.713993564233702	0.0832003004183023	-0.137146759529128	4	-0.201904587009141	0.353096235151845	0.176548117575923	0.296347153691971	0.481592821332819	-0.262805606366041	-0.118362196323393	0.1704493318282	-0.056080715765342	4	-0.0666997966566442	0.180258116933471	0.0901290584667353	0.487207177817531	0.707103124041481	-0.310260360824376	0.125714840648455	-0.197788381218356	-0.172702086112886	4	-0.138758996876791	0.186186045031886	0.0930930225159428	0.186670257004805	0.373959037061317	-0.181874757899024	0.320107659262993	0.344889243330673	-0.0411774066749106	4	0.110486184504933	0.262908553302921	0.13145427665146	0.432843760130025	0.658855330751795	-0.238535613824274	0.135392595482884	-0.210217707390346	-0.175538607905839	4	-0.122224833409394	0.173666386818973	0.0868331934094865	0.208893520284421
E9PF06	NA	0.00371669172727793	0.135219608788137	0.0294317640937543	3	0.0561226882030563	0.069696186202942	0.0402391118657588	0.156386402020202	0.329496918870366	NA	0.0628408735702314	0.0062794224962812	-0.0398339782925851	3	0.00976210592464251	0.0514259478683618	0.0296907848451304	0.710528618655113	0.849156917647861	NA	0.0273349412758291	0.132360220473975	0.0176478658194246	3	0.0591143425230764	0.0636174412824267	0.0367295468495643	0.11240003164177	0.26442435459383	NA	-0.0349872995595682	0.0343061220373204	0.0369942074822014	3	0.0121043433199845	0.0408047003746044	0.0235586047454799	0.566008939317936	0.752769478028209	NA	-0.0233918483542284	0.169536814963208	0.0777076029567283	3	0.0746175231885692	0.0965014441710244	0.0557151347693286	0.170334533650634
E9PF32	-0.13723363411471	0.157327382778481	0.0277871800996957	0.137179116064075	4	0.0462650112068854	0.134923938966092	0.0674619694830462	0.518449330742951	0.688228333508598	-0.0161068104985495	0.215316904256327	0.0914368283733308	0.127755547198372	4	0.10460061733237	0.0958085163936243	0.0479042581968121	0.0717110012192072	0.265339481867397	-0.115144914057672	0.0815420153550611	0.173912709918481	-0.0148732764815303	4	0.0313591336835849	0.124419606526276	0.0622098032631378	0.632171378404706	0.778433432552924	-0.0221389772692486	0.12371044645949	-0.0977458145122003	0.061140294813904	4	0.0162414873729863	0.0966637559342896	0.0483318779671448	0.748280263729489	0.875745736451508	-0.0296164807660979	0.0496373614098738	-0.0845184533577761	0.0576605683871918	4	-0.00170925108170212	0.0678169780325115	0.0339084890162558	0.961433647241088
E9PFH4	0.0477845165583034	-0.0517784208644254	-0.0253241563598667	-0.053304620588854	4	-0.0206556703137107	0.0474005397189742	0.0237002698594871	0.416966193524536	0.596746244845804	-0.0370833599555579	-0.0536878708939883	0.0929127313571793	0.079490593660682	4	0.0204080235420787	0.0764703504545518	0.0382351752272759	0.612699745874084	0.799737189886595	-0.0694424650177443	-0.0666412069331848	0.0254450165574633	0	4	-0.0276596638483664	0.0477860762846364	0.0238930381423182	0.291005829691042	0.489816605320724	-0.0751573595687394	-0.0746710010320504	0.0076943917900007	-0.00156220377028332	4	-0.0359240431452681	0.0451806881108099	0.0225903440554049	0.162884077545451	0.386021156664449	0.0290207063682439	-0.0670492022763258	-0.0317864886676505	-0.0880757666554997	4	-0.039472687807808	0.0512287228244907	0.0256143614122454	0.174241335001727
E9PFP8	-0.0620461377204905	0.0439805619410053	-0.0804657105523276	0.0910265195734146	4	-0.00187619168959956	0.0827254303786374	0.0413627151893187	0.965292757169055	0.980208265005728	0.0768579700603323	-0.0953069600957274	-0.193319497140134	0.0372329061989751	4	-0.0436338952441385	0.124007545773518	0.0620037728867591	0.507977383753247	0.726845813398522	-0.0373697592455688	-0.013307043221517	-0.0120296888611995	0.155549979167389	4	0.0232108719597758	0.0889927102443621	0.0444963551221811	0.620611576112331	0.770132170224299	0.0254066069985442	-0.0594244122004331	0.120217082187391	0.0745469533650539	4	0.040186557587639	0.0768685325891516	0.0384342662945758	0.33603239106014	0.577173817144774	-0.0774209911578604	0.00408888806787866	0.0139056020252182	0.256013978156021	4	0.0491468692728145	0.143858255028085	0.0719291275140423	0.51993545070311
E9PFR3	-0.0369065754419822	0.0172632235652258	-0.074233756840813	-0.137146759529128	4	-0.0577559670616743	0.0649024693362849	0.0324512346681425	0.125415320745115	0.283144521741959	0.0305643177863973	-0.141791862458216	0.113418386791821	0.10455593104259	4	0.026686693290648	0.118301964712627	0.0591509823563134	0.667719938504133	0.825925741532205	-0.03226286881248	0.129756005870319	-0.00686182050225903	0.0292943067940382	4	0.0299814058374044	0.0711505820323566	0.0355752910161783	0.431669062347647	0.624545087709661	-0.108982237217006	0.018079121813336	-0.049042622936519	-0.0819111977866176	4	-0.0554642340317015	0.0548132612749982	0.0274066306374991	0.0894343517323532	0.26505497176758	-0.136038539902252	0.0601488471884748	-0.120142363088497	-0.0268613401675663	4	-0.0557233489924603	0.091030618785079	0.0455153093925395	0.266733736329522
E9PG73	0.111630998582929	0.0808072187533838	0.177615902310409	-0.0782007524743971	4	0.0729633417930812	0.108565580650477	0.0542827903252386	0.227497380241473	0.413296021917052	-0.0547998540725377	-0.0536878708939883	-0.0237943003396734	-0.203914429423336	4	-0.0840491136823839	0.0811904360131642	0.0405952180065821	0.0838388120603163	0.290205892247187	0.156681516623918	0.0055085788226506	0.0537503857776089	-0.179388981240129	4	0.00913787499601213	0.140611698915914	0.0703058494579568	0.900835569857949	0.941966768481695	0.110398293587337	0.041248286267517	0.211328754839088	-0.0901978089715783	4	0.068194381430591	0.126600154130122	0.063300077065061	0.322734367063614	0.566423789452026	0.0814148316226458	0.0337251224441324	0.188052941309091	-0.106053507584555	4	0.0492848469478286	0.122012334544941	0.0610061672724705	0.450001044225901
E9PGT6	-0.0676927008616326	0.1063834654594	NA	-0.227555547433956	3	-0.062954927612063	0.167019911850565	0.0964289910669514	0.470511099475391	0.64629274531027	0.232003364960628	-0.143610003897195	NA	0.0675427403562339	3	0.0519787004732224	0.188289750701653	0.108709138253247	0.592396024734612	0.787615514973176	0.26767970206714	-0.124427482381209	NA	0.128733314122203	3	0.0906618446027112	0.198806661401305	0.114781079476734	0.388480948487908	0.588071060229817	-0.0880732474540248	-0.129339870801682	NA	-0.18997094364407	3	-0.135794687299926	0.0512545960302997	0.029591854815299	0.00274823261240975	0.0287470836931303	-0.0840642647884743	0.0149362703048711	NA	-0.0895653847959863	3	-0.0528977930931965	0.0588103791702966	0.0339541882451147	0.121647291107797
E9PHY5	0.0333508850720662	0.0772841521896867	0.108074969057332	0.116483249059154	4	0.0837983138445597	0.037616655664407	0.0188083278322035	0.00430424102820133	0.0317184850639366	-0.0265569611139551	-0.0657032470508297	0.0615971908909711	0.078002512001273	4	0.0118348736818648	0.0691388403155447	0.0345694201577724	0.743760805253549	0.868718812429965	0.0364261700890787	0.0175539204832436	0.0717740676129361	0.102787318293835	4	0.0571353691197734	0.037832763391995	0.0189163816959975	0.0233845374409267	0.0954000764965203	0.0527289435132491	0.0483030438014674	0.0915414541028352	0.103900866112316	4	0.074118576882467	0.0277758862224782	0.0138879431112391	0.00176648933900127	0.0212673205940426	0.0372062321051075	0.0562160095665481	0.109283650102477	0.113104895269451	4	0.0789526967608959	0.0380616326914104	0.0190308163457052	0.00601998057776385
E9PI99	NA	NA	NA	NA	0	NA	NA	NA	NA	NA	NA	NA	NA	NA	0	NA	NA	NA	NA	NA	NA	NA	NA	NA	0	NA	NA	NA	NA	NA	NA	NA	NA	NA	0	NA	NA	NA	NA	NA	NA	NA	NA	NA	0	NA	NA	NA	NA
E9PJA2	-1.03137900147355	NA	-1.15742769236721	-1.29016752473364	3	-1.15965807285813	0.129408677802668	0.0747141349648439	8.37503810769651e-06	0.000506354803991331	-0.996571812151117	NA	-1.04311639774129	-1.12125115470662	3	-1.05364645486634	0.0630031443049546	0.0363748823242584	3.78188382169214e-07	0.000163323354185362	-1.02920738929221	NA	-1.13818823901713	-1.13809552008195	3	-1.1018303827971	0.0628933743601695	0.0363115066170878	3.00030574824354e-07	7.55827023078353e-05	-0.978195629681652	NA	-1.17620705308042	-1.12382858685286	3	-1.09274375653831	0.102600345788232	0.0592363372597842	3.56347733853995e-06	0.000428126266827418	-0.752403139762543	NA	-1.34126981718837	-1.13806390248718	3	-1.0772456198127	0.299107235914208	0.172689643171633	0.000684770309259194
E9PK25	-0.0606379433276823	-0.0517784208644254	-0.0465183786289901	0.17243369248555	4	0.00337473741611296	0.112856468552147	0.0564282342760734	0.954252510199672	0.974891969697062	-0.224873410840203	-0.212544635380101	-0.0925850740055942	0.0341666031511916	4	-0.123959129268677	0.121132383111874	0.0605661915559368	0.0866403008484578	0.295801900435428	-0.152335473366089	-0.159750611324666	-0.113909302880413	-0.00741747156248301	4	-0.108353214783413	0.0702258874769017	0.0351129437384508	0.021501629445845	0.0910356103848592	-0.10372651176551	-0.0219983175619992	-0.0233325038306239	0.103900866112316	4	-0.0112891167614543	0.0857771032064689	0.0428885516032345	0.801187033194309	0.904739783842508	-0.0424977720628302	-0.0570749746105171	-0.172328583285633	0.0803596166463261	4	-0.0478854283281637	0.103354349976487	0.0516771749882436	0.389871945681967
E9PK91	-0.23073889391844	-0.120240300184709	-0.17899800278943	-0.0794569084448227	4	-0.15235852633435	0.066330913030371	0.0331654565151855	0.00371579724319343	0.0283657956216509	-0.09089919469927	-0.268975505681579	-0.207782726452097	-0.194891916958888	4	-0.190637335947958	0.073929316539685	0.0369646582698425	0.00210027443002083	0.0315877094624526	-0.12272381725555	-0.188393749779608	-0.132549032980256	-0.080635468207635	4	-0.131075517055762	0.0443527544019498	0.0221763772009749	0.00104343738729025	0.0130884283061345	-0.106351981172334	-0.113507667570167	-0.0854150126014809	-0.0443941193584535	4	-0.0874171951756087	0.0310603319275127	0.0155301659637563	0.00134473922916483	0.0180403879124254	-0.166265327334112	-0.109121722380112	-0.0808192332774659	-0.0776912845076945	4	-0.108474391874846	0.0410390820002263	0.0205195410001132	0.00185381973375656
E9PKG1	0.0940369385681911	0.0209357627759851	0.00589457425085348	0.130675596226415	4	0.0628857179553611	0.0593679356273877	0.0296839678136938	0.0784450147716585	0.210954439784998	0.0305643177863973	-0.045166316048135	-0.0479876292939905	0.114751698148478	4	0.0130405176481875	0.0769517554883015	0.0384758777441508	0.746211697394009	0.869435249626677	0.0785796215040241	0.0381255304047505	-0.0241605294463319	0.0875498790495809	4	0.0450236253780059	0.0508871893517628	0.0254435946758814	0.127203792238244	0.287501158331643	0.0679461519630693	0.0108746372239983	0.0229611484433112	0.146841388329271	4	0.0621558314899124	0.0615661038040577	0.0307830519020289	0.090005392712265	0.26519132765027	0.0853674232481461	0.0230186166027298	0.00870669535089913	0.105313543978608	4	0.0556015697950957	0.046968303130528	0.023484151565264	0.0557013177654636
E9PKI3	NA	NA	NA	NA	0	NA	NA	NA	NA	NA	NA	NA	NA	NA	0	NA	NA	NA	NA	NA	NA	NA	NA	NA	0	NA	NA	NA	NA	NA	NA	NA	NA	NA	0	NA	NA	NA	NA	NA	NA	NA	NA	NA	0	NA	NA	NA	NA
E9PKK4	NA	0.190317273896975	-0.0541638392398485	-0.0632115782549438	3	0.0243139521340608	0.143834253648296	0.0830427450625329	0.740635558351156	0.846160730497182	NA	0.0955776599822312	0.169050693773054	0.0765128938607865	3	0.113713749205357	0.0488620445988765	0.0282105146023169	0.00480752895638011	0.0497340779157039	NA	0.260825071495608	-0.0451965527963989	0.120590140813589	3	0.112072886504266	0.153188499402882	0.0884434213670087	0.190310755781905	0.37824419114313	NA	0.254519317635417	0.015347964333436	-0.235200197637068	3	0.0115556947772614	0.24488178145989	0.141382562445503	0.92597349856433	0.964582317767046	NA	0.158811482866521	0.0962716562290207	0.172723634794986	3	0.142602257963509	0.0407219901973123	0.0235108520023556	0.000779938492240634
E9PKP7	-0.164200681714979	-0.216409122637225	-0.0882937006793506	-0.1293201849588	4	-0.149555922497589	0.0543027446737006	0.0271513723368503	0.00150330104357911	0.0148214320421163	-0.194444051757062	-0.319459839296613	-0.193319497140134	-0.203914429423336	4	-0.227784454404286	0.0613013594619409	0.0306506797309705	0.000305543868525979	0.00982616079312802	-0.111908961207414	-0.157286571373185	-0.16671972342781	-0.094787358652751	4	-0.13267565366529	0.0347921177424683	0.0173960588712342	0.000264976322224275	0.00563095816363954	-0.0421073935018447	-0.161535238464462	-0.049042622936519	-0.0492326762948347	4	-0.0754794827994152	0.0574661982915947	0.0287330991457973	0.0392211402694256	0.157071283133035	-0.101930685581988	-0.153975958164373	-0.0461417816447205	-0.0311486985706643	4	-0.0832992809904364	0.0561031340115423	0.0280515670057712	0.0249735087600982
E9PKV2	NA	NA	NA	NA	0	NA	NA	NA	NA	NA	NA	NA	NA	NA	0	NA	NA	NA	NA	NA	NA	NA	NA	NA	0	NA	NA	NA	NA	NA	NA	NA	NA	NA	0	NA	NA	NA	NA	NA	NA	NA	NA	NA	0	NA	NA	NA	NA
E9PL71	NA	NA	NA	NA	0	NA	NA	NA	NA	NA	NA	NA	NA	NA	0	NA	NA	NA	NA	NA	NA	NA	NA	NA	0	NA	NA	NA	NA	NA	NA	NA	NA	NA	0	NA	NA	NA	NA	NA	NA	NA	NA	NA	0	NA	NA	NA	NA
E9PLK3	0.0227622500838711	0.0282529130727852	0.0832003004183023	0.0235932492823289	4	0.0394521782143218	0.0292653439182164	0.0146326719591082	0.0357577427716121	0.128946217261571	-0.0219031021077383	0.0293439615821444	0.0988012907196386	0.00783649423196628	4	0.0285196611065027	0.051349895730084	0.025674947865042	0.309176114784772	0.568492810187114	0.00398259753501984	0.0219092295747602	0.0879661011155219	0.0044322463152607	4	0.0295725436351407	0.0398137908617172	0.0199068954308586	0.187944677371738	0.376262754764745	0.0230061155281018	0.04654258593703	0.0769870301258219	0.0232323062377168	4	0.0424420094571676	0.0255404245009503	0.0127702122504752	0.0159345491964286	0.0875820767650974	0	0.0350578662256442	0.0447116488063929	-0.0211646099980423	4	0.0146512262584987	0.0306457855511419	0.0153228927755709	0.375910619369412
E9PM00	0.221042215303511	-0.371458075958771	0.0720057143498097	0.0491078137176238	4	-0.00732558314695653	0.254442204789651	0.127221102394825	0.955951733584529	0.975765472712879	0.0505866212182111	0.0691339916878611	0.120671770803141	0.267480310864986	4	0.12696817364355	0.0982551772149995	0.0491275886074997	0.0415199390854205	0.190751938989706	0.0662528718285885	0.133785882906472	0.0782727049116779	0.14086253583985	4	0.104793498871647	0.0379923948748324	0.0189961974374162	0.00149169941971781	0.0159908061908048	0.0956246036100198	-0.0594244122004331	-0.124829693714824	0.00156051398761693	4	-0.0217672470794052	0.0937460417584289	0.0468730208792144	0.658742677475799	0.817081433985846	0.0674948541828797	-0.324660472675498	0.0531534226930545	0.0013999952975275	4	-0.050653050125509	0.184864182795367	0.0924320913976833	0.603464194349043
E9PM19	0.3536956305696	0.145039545854729	0.439561892369539	NA	3	0.312765689597956	0.151467152214941	0.0874496011046823	0.00790280449514763	0.0462092417578941	0.00114363465432932	0.0293439615821444	0.803979668921202	NA	3	0.278155755052559	0.455595111811807	0.263037960446025	0.261978123794127	0.521369235174224	-0.17917708558473	0.0636983424946574	0.386519687629076	NA	3	0.0903469815130009	0.283788340629553	0.16384527485535	0.538989638247731	0.713380469790413	-0.0122574657552846	0.0984436878490599	-0.180572245641821	NA	3	-0.0314620078493485	0.140495849096082	0.0811153162956477	0.662422121414199	0.820697570916034	-0.0105076578183932	0.129166021117996	0.461018567472803	NA	3	0.193225643590802	0.242202336297278	0.13983558405959	0.159531744408032
E9PNF5	0.309730506617433	0.0135813116368337	-0.147579906410865	0.20168557159604	4	0.0943543708598605	0.202454396609944	0.101227198304972	0.387252734861981	0.568283989071732	0.342601663152112	0.408848321872045	0.0125316318086201	-0.274394267998342	4	0.122396837208609	0.316258419104604	0.158129209552302	0.468304951035163	0.69396206961163	0.686645717679142	0.358763007903918	0.00171036776510286	-0.164386817900882	4	0.22068306886182	0.379655598833011	0.189827799416506	0.289159341802547	0.488572718775729	0.187448374432785	0.360344790371717	-0.308489720562558	-0.0524674198941356	4	0.046709006086952	0.291076779029245	0.145538389514622	0.759140698573229	0.879819268061874	0.297857986627907	-0.0192362188629174	-0.416202372205181	0.0332305295666339	4	-0.0260875187183892	0.294785719072426	0.147392859536213	0.865337363948713
E9PNJ4	-0.12540819871792	-0.204924922366861	-0.299219554825427	0.18504290639347	4	-0.111127442379185	0.20983916500521	0.104919582502605	0.330288385372241	0.516000924537614	-0.231574282342807	-0.280931610360351	-0.19692173382033	0.268785326820899	4	-0.110160574925647	0.254971586675504	0.127485793337752	0.420729447033699	0.657634497612654	-0.247366795911513	-0.442150342025391	-0.178292205592558	0.146220740851044	4	-0.180397150669605	0.244733422607768	0.122366711303884	0.19085787346252	0.378833454679709	-0.146318388489978	-0.184093829494326	-0.280107919192735	-0.0347654181606766	4	-0.161321388834429	0.101440175441299	0.0507200877206496	0.019060898715531	0.0982336694596702	0.0991168333561048	-0.259490033734217	-0.133491916747517	0.187558675957928	4	-0.0265766102919254	0.206019665863487	0.103009832931743	0.805027745046401
E9PNL8	NA	0.185961964805458	-0.0633921971933861	0.0491078137176238	3	0.057225860443232	0.124875143797778	0.0720966978867406	0.386338779744945	0.567493746923697	NA	0.378764972106938	-0.213244039122263	0.117651588654273	3	0.0943908405463163	0.296689170928179	0.171293572701031	0.539250674232359	0.753126063769476	NA	0.1063631874411	-0.207636167174703	-0.0916304754655682	3	-0.0643011517330571	0.158773636434209	0.0916680017355064	0.440032972969682	0.630734792454883	NA	0.399490080542963	-0.189342455269553	0.176156955153827	3	0.128768193475746	0.297262863233681	0.171624794108044	0.410938028030937	0.643994639055221	NA	0.218682938843919	-0.204168662717541	0.0359654972878727	3	0.0168265911380838	0.212074497599855	0.122441268277531	0.87596377673193
E9PNM1	0.0201029036333811	-0.0921999951496112	-0.249220168286702	0.0775642597668521	4	-0.0609382500090201	0.143965263469429	0.0719826317347143	0.429701104535683	0.607855142260819	0.259980273884222	0.0309568125504454	-0.218726104138678	0.0615315023223722	4	0.0334356211545902	0.196386980571487	0.0981934902857436	0.745079983494048	0.869307908183137	0.332458037270326	0.0370500961090408	-0.211594180743386	0.0565835283663675	4	0.0536243702505871	0.222390465049719	0.111195232524859	0.646713307491913	0.787994489539723	0.246256313833091	0.0054475648396704	-0.158877174542502	0.0232323062377168	4	0.029014752591994	0.166419270956598	0.0832096354782992	0.739228511492995	0.87007921628481	0.289316250362105	0.0731814113408246	-0.319310564612228	0.0935470488786503	4	0.0341835364923381	0.255013491177634	0.127506745588817	0.797607117680657
E9PQY2	0.0490895325142166	0.0808072187533838	0.223868324320296	-0.354099558099401	4	-8.36206278760354e-05	0.247953681505002	0.123976840752501	0.999483704348264	0.999630517165376	-0.0739403675394341	-0.263034405833794	0.312774108113057	0.231791119338698	4	0.0518976135196317	0.267977357972818	0.133988678986409	0.711879681093353	0.849156917647861	-0.12272381725555	0.0562863149719581	0.54505377928452	0.300762027068661	4	0.194844576017397	0.290925573873048	0.145462786936524	0.228919076922733	0.422639236952401	-0.0308411710700424	-0.107615099646966	0.155278225477911	-0.200697350237129	4	-0.0459688488690565	0.15107437565582	0.0755371878279098	0.56512838184102	0.752672847243666	-0.0686106123819615	0.0731814113408246	0.679599374859231	0.305588081830777	4	0.247439563912218	0.326801147492406	0.163400573746203	0.18071923976522
E9PQY3	-0.0522175203523823	0.0854912976761994	-0.115231128713004	-0.0167478917062867	4	-0.0246763107738684	0.0839810594867603	0.0419905297433801	0.578188396023074	0.736471094425889	0.0450526863895756	0.67022778626725	-0.195119491186344	-0.189505370411829	4	0.0826639027646631	0.407384195410268	0.203692097705134	0.698945251982542	0.845631794400827	0.063393217689348	0.0424192688148841	0.0119302100829818	-0.213296418381829	4	-0.0238884304486537	0.128027546496497	0.0640137732482485	0.721846161793606	0.837681568142545	0.117166226441209	0.320107659262993	-0.189342455269553	0.089298564924523	4	0.084307498839793	0.209436243090748	0.104718121545374	0.451483647756539	0.673737133117358	0	0.0731814113408246	-0.154722594798642	-0.0225866850672402	4	-0.0260319671312644	0.0950335123320427	0.0475167561660213	0.603564012171116
E9PRJ8	0.481952312414051	0.291084565053264	0.0677852480316148	-0.0520710206497436	4	0.197187776212297	0.237193598947856	0.118596799473928	0.147438778457037	0.314987581113514	0.286487227633607	0.139598072554269	-0.0205989611798667	0.0357005693147287	4	0.110296727080685	0.134907288276429	0.0674536441382144	0.153135004129473	0.397003577401691	0.39672607584896	0.378426711388787	0.175428942365861	0.14086253583985	4	0.272861066360864	0.133420734060256	0.0667103670301278	0.00642757177780902	0.0423068153854327	0.389175435966878	0.135351852894886	0	0.108252890652023	4	0.158195044878447	0.164715556318797	0.0823577781593984	0.103147784592351	0.285807289479997	0.314791221408209	0.302968492848395	0.252516533919795	0.0830067642530264	4	0.238320753107356	0.107006258543592	0.0535031292717962	0.00430908839244128
E9PRK3	NA	NA	NA	NA	0	NA	NA	NA	NA	NA	NA	NA	NA	NA	0	NA	NA	NA	NA	NA	NA	NA	NA	NA	0	NA	NA	NA	NA	NA	NA	NA	NA	NA	0	NA	NA	NA	NA	NA	NA	NA	NA	NA	0	NA	NA	NA	NA
E9PRZ1	NA	NA	NA	NA	0	NA	NA	NA	NA	NA	NA	NA	NA	NA	0	NA	NA	NA	NA	NA	NA	NA	NA	NA	0	NA	NA	NA	NA	NA	NA	NA	NA	NA	0	NA	NA	NA	NA	NA	NA	NA	NA	NA	0	NA	NA	NA	NA
E9PS76	-0.15365351694674	-0.0262884461103758	0.0436332160383993	NA	3	-0.0454362490062389	0.100027458829021	0.0577508802812897	0.390206311006801	0.57150856500657	-0.269685424081278	-0.247310053540777	0.0234082210592259	NA	3	-0.164529085520943	0.163142538000249	0.0941903882307223	0.0911551909663132	0.303817135932927	0.0710064017992232	-0.193433737580955	0.17694358296786	NA	3	0.018172082395376	0.190757539495509	0.110133916777683	0.851427462671932	0.912099010641731	0.102462033663573	-0.209112289531166	0.0511580402739633	NA	3	-0.0184974051978764	0.167058524270614	0.0964512839580606	0.827778578516439	0.921345597516641	-0.124579424527188	-0.0443514669898747	0.0328095597501013	NA	3	-0.0453737772556539	0.0786994722451737	0.0454371614858325	0.286187090304829
E9PSI1	-0.0258725251670055	0.0487855457028581	0	-0.0794569084448227	4	-0.0141359719772425	0.0534275662702516	0.0267137831351258	0.61568812877358	0.764536151519155	0.0659696539175961	0.0533494245929337	0.0751014552407187	-0.00629998835573825	4	0.0470301363488776	0.0366548763240062	0.0183274381620031	0.0425574636461382	0.193792302378668	-0.0302251636137061	0.0413470316485534	0.0943923702749549	-0.0573531709777861	4	0.012040266833004	0.0689022767580128	0.0344511383790064	0.738662326883778	0.848073001963411	-0.0295947821882959	0.181000249810469	0.136100123794046	-0.113656781795567	4	0.043462202405163	0.138470450707573	0.0692352253537865	0.553295221831621	0.745038510288191	0.0125089949065784	0.0469974795371696	0.0732143953949549	-0.181880134779666	4	-0.0122898162352407	0.115760976188803	0.0578804880944014	0.838878520697555
F1T0I1	NA	0.263447844736434	-0.155781719523652	-0.044691490284146	3	0.0209915449762118	0.217195885615233	0.125398103026834	0.849300960011312	0.916973008973824	NA	0.802641768434575	-0.198726230667078	-0.162870243908362	3	0.147015097953045	0.568072320423758	0.327976707115832	0.615089488898642	0.802087134305767	NA	0.0251671045931189	-0.280596968363821	-0.144623563079452	3	-0.133351142283385	0.15319339959919	0.0884462504966661	0.131409294309991	0.294041670391638	NA	0.100141975321086	-0.101879614019214	-0.276209794581527	3	-0.0926491444265517	0.188345599507615	0.108741382576403	0.355228555393103	0.59625537087915	NA	0.254592898945537	-0.347923303420307	-0.246877389626101	3	-0.113402598033624	0.322673338720959	0.186295538970861	0.499507109983587
F2Z2U4	0.00404305273728199	NA	-0.293778837977913	-0.00118985164755947	3	-0.0969752122960636	0.170457021366726	0.098413407171341	0.291891387002446	0.477482501573806	-0.271065333359975	NA	0.668997080731883	0.332575339086871	3	0.243502362152926	0.476319044351534	0.275002928476504	0.338336154736043	0.590798785355338	-0.686671901017277	NA	0.0815110789782225	0.335184191589629	3	-0.0899922101498085	0.532078473663203	0.307195649999455	0.740501262459891	0.84841194587155	-0.263034405833794	NA	0.125530882083859	-0.068750832495644	3	-0.0687514520818596	0.194282643959567	0.112169136788928	0.496692978824787	0.70559345629104	0.261637798715154	NA	-0.168397531695719	0.394583401504416	3	0.162607889507951	0.294265313917413	0.169894158203388	0.304431013336409
F2Z357	-0.317212300220945	-0.152968245226277	-0.00443678988604308	NA	3	-0.158205778444422	0.15645351955764	0.090328481632268	0.0905102869618528	0.23070202148877	-0.136702884312395	0.0831939355263988	0.0899594139678318	NA	3	0.012150155060612	0.128954889099141	0.0744521399347075	0.853028775234745	0.92711901885911	-0.21923862547924	0.0562863149719581	0.0975948023132988	NA	3	-0.0217858360646609	0.172241983317964	0.0994439554343817	0.803884527840147	0.884422713386477	-0.271849270573837	0.12036700338512	0.0361883076152968	NA	3	-0.038431319857807	0.206481156507635	0.119211951292268	0.715850839794674	0.85635816727317	0.0269670476002694	0.132905189623789	0.175735299432314	NA	3	0.111869178885457	0.0765825273749047	0.0442149427951231	0.0292794007074695
F5GWT4	0.0412416706915315	-0.0764183058818358	-0.0373969886604418	-0.0155451446246295	4	-0.0220296921188439	0.0491242975120059	0.0245621487560029	0.404322764421304	0.583699960289209	0.018190249374504	-0.0282727384627099	0.0249553472567044	0.0675427403562339	4	0.0206038996311831	0.0392298412095193	0.0196149206047597	0.333980456900583	0.587331542298117	-0.043521986227164	-0.0677976759657629	0.00682933839011635	0.0986475879329115	4	-0.00146068396747476	0.0736209667344227	0.0368104833672113	0.969634709025254	0.983296117203403	0.0480142496411971	0.0323810485132946	0.017255030098095	0.0936947949618539	4	0.0478362808036102	0.033051031721517	0.0165255158607585	0.0275244411632662	0.123451610736727	0.0614877877350065	-0.0727798753163921	-0.00174766228626722	0.0522673096169733	4	0.00980688993733011	0.0617194834410944	0.0308597417205472	0.76141399703086
F5GXX5	0.0187713898878366	0.0343223163908956	0.0306812533688753	0.0999320727953065	4	0.0459267581107285	0.0366109114880797	0.0183054557440398	0.0459708658759441	0.151713894697575	-0.00573181143659268	-0.0182307370770864	0.00940891405071986	-0.0110430996117572	4	-0.00639918351867912	0.0117174079975706	0.00585870399878532	0.316626866139431	0.572175190858379	-0.00299417964455373	-0.0211265476808161	0.110333914143976	0.0636799275288407	4	0.0374732785868618	0.060737181025761	0.0303685905128805	0.263360356572024	0.462333541183059	-0.0509312438888507	-0.0294062672962684	0.053018382299491	-0.0093986980022496	4	-0.00917945672196943	0.0447993855735977	0.0223996927867988	0.696180164315497	0.843909972537819	-0.0708081680862075	-0.0123366598452326	0.0565163497190182	0.0332305295666339	4	0.00165051283855302	0.0561351314661979	0.028067565733099	0.955017051656485
F5GY05	-0.0578256714022956	0.0901602177410462	NA	-0.197239923006485	3	-0.0549684588892446	0.143721372707519	0.0829775732209888	0.464378154777295	0.640437071247867	0.0147970019280807	0.0847477267814796	NA	-0.20935514627085	3	-0.03660347252043	0.153641243045472	0.0887048130309318	0.642764949158724	0.815049681756218	0.0870522431590466	0.117598391444083	NA	-0.00890555322189196	3	0.0652483604604125	0.0660103702425979	0.0381111050288708	0.0960946856751196	0.24248266677453	0.0420991325361961	0.0483030438014674	NA	-0.132360220473975	3	-0.013986014712104	0.102561988919201	0.0592141919111239	0.789022115897172	0.896819894402102	-0.250940634715055	0.148997193039565	NA	-0.145791264511787	3	-0.0825782353957589	0.207326992465498	0.119700294910231	0.447159175833482
F5GYQ1	-0.00540842260729001	0.0487855457028581	-0.0618500323849806	0.0282659498558595	4	0.00244826014161175	0.0483380285800521	0.024169014290026	0.922614625608821	0.957149874218926	-0.0172642073042178	-0.076082392830829	-0.170121674476615	-0.134991211332925	4	-0.0996148714861467	0.0672262452017049	0.0336131226008524	0.0251662138249023	0.141407926380446	-0.0302251636137061	-0.0448426166546237	-0.138188239017125	-0.090054620540029	4	-0.075827659956371	0.0487541752377354	0.0243770876188677	0.0208325893483585	0.0897107088320339	-0.00122107078037506	-0.0405900057889442	-0.118534287183345	-0.067114195858537	4	-0.0568648899028004	0.0492248896831966	0.0246124448415983	0.0602348143271893	0.203907999676476	0.0594798611187601	0.0350578662256442	-0.114458724584915	-0.0498759066395696	4	-0.01744922597002	0.0798695010875351	0.0399347505437675	0.677439300724288
F5GZS6	-0.256302265568872	-0.202068099570204	-0.0603095143091983	-0.250010398261652	4	-0.192172569427482	0.0911840980167244	0.0455920490083622	0.00559182697943905	0.0379464204349815	-0.210240140663931	-0.292987627935422	0.0870000384872877	-0.0511874548587897	4	-0.116853796242714	0.168930548170928	0.0844652740854638	0.21579894445012	0.475481201948042	-0.20537755769359	-0.159750611324666	0.110333914143976	-0.101121924442866	4	-0.0889790448292865	0.139559227046225	0.0697796135231123	0.249405945165692	0.446126729133661	-0.218329633405367	-0.28910238770484	-0.0570464994483389	-0.235200197637068	4	-0.199919679548903	0.0999165358080461	0.0499582679040231	0.00710493538251383	0.0534284071177595	-0.214041051903526	-0.122432175963491	0.13655051587147	-0.0747379671183471	4	-0.0686651697784734	0.148520923960278	0.0742604619801391	0.390818584063693
F5H345	-0.32226552794723	-0.104150597646403	0.0407650340979056	-0.151606694200658	4	-0.134314446424096	0.149652166875747	0.0748260834378735	0.122796057792224	0.279505690646837	-0.0884642657822161	-0.0502732064812237	-0.0561430780375339	-0.189505370411829	4	-0.0960964801782006	0.0644968170433914	0.0322484085216957	0.0246403675574561	0.138711044927728	-0.075733296384624	-0.00885771034755212	0.189003799831668	-0.310872906378367	4	-0.0516150283197186	0.206173023527201	0.1030865117636	0.634418101960087	0.779295376767714	-0.260108045721135	-0.37851162325373	0.186120861798326	-0.200697350237129	4	-0.163299039353417	0.244391312557548	0.122195656278774	0.22987277751391	0.470166039529466	-0.156897144799917	-0.0109606988054154	0.0565163497190182	-0.101538026462062	4	-0.053219880087094	0.0947127182978492	0.0473563591489246	0.304033115192335
F5H365	NA	-0.0608073866655514	0.0550492601041532	-0.18772612000731	3	-0.064494748856236	0.121429686555678	0.0701074622205328	0.32163309664918	0.506668499828281	NA	0.0691339916878611	-0.0398780236747497	-0.374744793330811	3	-0.115162941772566	0.231317872455112	0.13355143593033	0.349952733374081	0.598363751691089	NA	0.09607287961403	-0.0611773381902874	-0.262146866561945	3	-0.0757504417127343	0.179553970012646	0.103665532920867	0.422413299763811	0.616886669171981	NA	0.181000249810469	-0.0292250717538248	-0.127235188296108	3	0.00817999658684536	0.157485318932801	0.0909241912792666	0.91855098605612	0.962488606879601	NA	-0.0192362188629174	0.109283650102477	-0.238590778441141	3	-0.0495144490671938	0.175902623422348	0.101557426984054	0.58536169219983
F5H442	-0.035522695200725	0.0123519165552901	-0.0851574058770496	-0.122830317780478	4	-0.0577896255757407	0.0588640783555277	0.0294320391777638	0.0972231308237933	0.242496307327003	-0.0488701497080076	0.0909462112505854	-0.0577797146746408	-0.0221713809986203	4	-0.00946875853267081	0.0686317246468132	0.0343158623234066	0.79185970020444	0.897896426750946	-0.0610971342081219	-0.0735939675749517	-0.0827642003984333	0.0147215057067656	4	-0.0506834491186853	0.0444983872796502	0.0222491936398251	0.0629731766074979	0.184565532070328	0.0193978726112532	0.0761820763769042	-0.071161028921239	-0.0540875155622975	4	-0.00741714887384477	0.0681891516545532	0.0340945758272766	0.83499206553664	0.925008196439144	0.00626805493243332	-0.0699116933758984	-0.0697781459119589	-0.0600613904859031	4	-0.0483707937103318	0.0367167487697486	0.0183583743848743	0.0388090652321698
F5H538	-0.150654149877031	NA	-0.326735233906716	-0.120242523291323	3	-0.19921063569169	0.111481429486372	0.0643638333236014	0.0140093327278384	0.0683842343543754	-0.0207419792757346	NA	-0.269025280091509	0.0824621601919729	3	-0.0691016997250903	0.180665027303885	0.104307002147049	0.464356367561581	0.690481701494667	-0.00900124609242692	NA	-0.219542933858877	-0.00148044655463087	3	-0.0766748755019782	0.123784498950493	0.07146701379057	0.255960476108754	0.454890369945188	-0.139579959421011	NA	-0.263806106863635	0.166451137397168	3	-0.0789783096291591	0.221437901064487	0.127847231788367	0.49347332794079	0.70300182392319	-0.180432659260706	NA	-0.386217223242342	-0.0513265805082946	3	-0.205992154337114	0.168902047024678	0.0975156423163768	0.0528639913511556
F5H5D3	-0.0190188541259431	0.195742985598044	0.0550492601041532	-0.064454745105576	4	0.0418296616176695	0.113817084340832	0.0569085421704162	0.490040154007919	0.662044819757866	-0.239656628640666	0.315325360063115	-0.0142294363041394	-0.141910625272716	4	-0.0201178325386014	0.241928071975236	0.120964035987618	0.873373960864932	0.938574292106181	-0.0150334292674683	0.174455813341133	0.196490557893691	-0.0420377931685881	4	0.0784687871996918	0.124374632919462	0.0621873164597311	0.253848669167236	0.451402662877973	0.0325842090715912	0.118692371692865	0.100563966567284	-0.036365745602519	4	0.0538687004323053	0.0706584296900933	0.0353292148450466	0.178159529342956	0.405249252974986	-0.271013237341449	0.0216746993738389	0.183446141095931	0.0603496559148319	4	-0.00138568523921164	0.192531256825947	0.0962656284129737	0.988982032404611
F5H5I6	-0.00135020603293651	-0.0262884461103758	-0.123250577049124	0.146879754306932	4	-0.00100236872137607	0.111733691503834	0.055866845751917	0.986266797699588	0.992094370279822	-0.0957814160790162	0.0180032346998905	-0.33496636967546	0.153416807463993	4	-0.0648319358976481	0.20690147583074	0.10345073791537	0.553940709767826	0.76264176705015	-0.0251434569123095	-0.0368938635391327	-0.209613816615145	0.0875498790495809	4	-0.0460253145042516	0.122641708143475	0.0613208540717377	0.481301579774894	0.668339308984614	-0.0184254744701842	-0.0256975376423093	-0.122728171069536	0.243647981376499	4	0.0191991995486173	0.157005273053715	0.0785026365268576	0.814940320472395	0.912115118849754	0.139595902711175	0.0283818013698226	-0.204168662717541	0.125997698150345	4	0.0224516848784506	0.158993178954605	0.0794965894773026	0.787108507235366
F5H5P2	NA	NA	NA	NA	0	NA	NA	NA	NA	NA	NA	NA	NA	NA	0	NA	NA	NA	NA	NA	NA	NA	NA	NA	0	NA	NA	NA	NA	NA	NA	NA	NA	NA	0	NA	NA	NA	NA	NA	NA	NA	NA	NA	0	NA	NA	NA	NA
F5H5V4	NA	0.10176683738903	-0.0711278459729914	0.0775642597668521	3	0.0360677503942968	0.0936195123961523	0.0540512506833201	0.461305211284571	0.637351761294908	NA	0.0909462112505854	-0.0858904214315859	0.241128983918034	3	0.0820615912456777	0.163690638777171	0.0945068343618217	0.346908000187372	0.597439249567631	NA	0.107388192841864	0.0354986812213863	0.281412935148649	3	0.1414332697373	0.126442696573438	0.0730017249037368	0.0684251107669435	0.195324938478253	NA	0.12371044645949	0.00961159478429147	0.0400346618022525	3	0.0577855676820113	0.059084329420446	0.034112353495783	0.09877758764223	0.279854402476533	NA	0.102716920795594	-0.0771294741284046	0.146389486981523	3	0.057325644549571	0.118471336041033	0.0683994577545452	0.362461485328612
F5H8H2	-0.2971745469844	NA	-0.737457897546137	-0.778797430311112	3	-0.604476624947216	0.266932884041111	0.154113772456699	0.00539467791064221	0.0367299804591699	-0.325937970522693	NA	-0.889493208628082	-0.395267117204156	3	-0.53689943211831	0.307316467293834	0.1774292451185	0.0152715787739924	0.101410239725288	-0.232062665836823	NA	-0.377314152942944	-0.230553741866629	3	-0.279976853548799	0.0842999501950982	0.048670598937812	0.000995531841080692	0.0127520879474023	0.0702730799528244	NA	-0.67345034737226	-0.394368162343522	3	-0.332515143254319	0.375699988110034	0.216910489269867	0.126403263551648	0.326595782663787	0.0331192745818646	NA	-0.492781278309393	-0.856143779763999	3	-0.438601927830509	0.447100376280169	0.258133522600139	0.09800535876232
F6QDS0	0.0227622500838711	-0.00372629145828404	0.0292349424298107	0.0270991927838642	4	0.0188425234598155	0.0152849667319381	0.00764248336596906	0.0487545001082909	0.158478337448778	-0.0137947987202622	-0.0132358271566941	0.0600888843856941	0.0479139336073013	4	0.0202430480290098	0.0392970680784094	0.0196485340392047	0.3426179352029	0.595934417789624	0.0315571305673431	-0.0380267218940753	-0.073730388533372	-0.0359568777764096	4	-0.0290392144091285	0.0439615264610849	0.0219807632305425	0.234606882007572	0.427436475372278	0.0121542002846291	-0.00729556569051992	-0.0272582070444239	0.00933786457933619	4	-0.00326542696774464	0.018152165861182	0.00907608293059098	0.731333410774013	0.865630736401661	0.0473732582621065	-0.0457596613826829	0.0242475462466773	-0.0513265805082946	4	-0.00636635934554843	0.0496602169703229	0.0248301084851614	0.806209290403318
F6RWC2	0.183506568535192	-0.220739376135958	NA	-0.900067927204693	3	-0.312433578268487	0.547575832175807	0.316143054108435	0.290639930701607	0.476208406781007	0.428418289214444	-0.0115746927867733	NA	-0.625604485218502	3	-0.0695869629302773	0.529400670448417	0.305649619592562	0.796411581109665	0.899347108589659	0.357576322093806	-0.363358739023267	NA	-0.526246385061976	3	-0.177342933997146	0.470358431635578	0.271561567120411	0.470391773028382	0.660471123950209	0.181002965167602	-0.504472582860788	NA	-0.552541023028779	3	-0.292003546907322	0.410340120002919	0.236909978742989	0.20069501375871	0.435535553907094	0.231635719725686	-0.883368332625778	NA	-0.666353954071442	3	-0.439362188990511	0.591145037407035	0.341297746477063	0.184506123685643
F6TLX2	-0.0452378500339366	-0.0569309086300282	-0.144312192576954	0	4	-0.0616202378102296	0.0603472880593218	0.0301736440296609	0.0871799387925585	0.22441998639878	0.0941101342820975	-0.00825815100230884	-0.0725935988181281	-0.0285691521967709	4	-0.00382769193377759	0.0705982449664327	0.0352991224832163	0.917185333511551	0.95707672185206	-0.0200795870559611	-0.0528354074081543	-0.0882117652381037	-0.0435620352975779	4	-0.0511721987499493	0.028280504700801	0.0141402523504005	0.0111117624184633	0.0613416336509826	0.0206016232366913	-0.0613214473730307	-0.0731887102682215	-0.0589587471149937	4	-0.0432168203798886	0.0429988127937473	0.0214994063968736	0.0911368152234731	0.266878838876886	0.00209237896124004	-0.0401351121888048	-0.158616510903133	-0.0717906830680102	4	-0.067112481799677	0.0680978808611367	0.0340489404305684	0.0962088439914172
F6U1T9	0.112879544780188	0.1063834654594	-0.0238221311946348	0.0317605701537272	4	0.0568003622996701	0.0651417338695221	0.032570866934761	0.131797581354026	0.292383748318029	0.0768579700603323	0.0147465853691864	0.0234082210592259	0.107476367345303	4	0.0556222859585118	0.0441526477565572	0.0220763238782786	0.0453149542435273	0.201037474534872	0.125946249328512	0.177387128350718	-0.106520323651042	0.0117891977036076	4	0.052150562932949	0.126406079364295	0.0632030396821475	0.440863383537639	0.630962184695762	0.0609427642253068	0.141962151015713	0.0897301606560122	0.00623195371151458	4	0.0747167574021366	0.0566487318601415	0.0283243659300708	0.0386490137905224	0.155283833130826	0.149068655331457	0.136634692021846	-0.0808192332774659	-0.0806506599882386	4	0.0310583635218997	0.129187580300502	0.0645937901502508	0.647670791587531
F6WIT2	-0.0190188541259431	0.131514180783082	-0.0526315023556021	-0.0143433994148762	4	0.0113801062216651	0.0818850361499299	0.0409425180749649	0.790377939734484	0.881014937985746	0.0626870699282946	0.0421965636542076	-0.0237943003396734	0.0690416444296512	4	0.03753274441812	0.0424590331982873	0.0212295165991437	0.127484971358822	0.363291764560205	-0.0251434569123095	0.0981368213693202	0.00853163362111692	0.0721497857558353	4	0.0384186959584907	0.0566786988036632	0.0283393494018316	0.224008297878348	0.419456619329668	0.00365702360808914	0.145255976740755	-0.0233325038306239	-0.0093986980022496	4	0.0290454496289926	0.0782535649520688	0.0391267824760344	0.485914774373454	0.700152699204457	-0.0576727658970735	0.151457031727369	-0.0808192332774659	0.0909191883326121	4	0.0259710552213605	0.113086168949845	0.0565430844749224	0.662179038180386
F8VQE1	0.237161880666788	0.224694359294173	0.0706002636386689	0.0988218803273707	4	0.15781959598175	0.0853529427220528	0.0426764713610264	0.0101117597656821	0.0539115516254973	0.210411607589671	0.160377990002522	0.0156476050304764	-0.0269670476002694	4	0.0898675387556	0.113521679863696	0.0567608399318482	0.164449713085869	0.413931292804815	0.208509925549158	0.228215141704355	0.0102319226109562	0.0833661302280864	4	0.132580780023139	0.103766550389165	0.0518832751945824	0.0431772939279105	0.142942268033649	0.127258965129658	0.172953965479339	0.113101432542341	0.1426043954428	4	0.138979689648535	0.0256544309650674	0.0128272154825337	3.66038814953359e-05	0.0019604481507924	0.133882251516781	0.197414322090268	-0.0282198736474581	0.056314142679675	4	0.0898477106598166	0.0975945205578462	0.0487972602789231	0.11517925793481
F8VUC8	NA	NA	NA	NA	0	NA	NA	NA	NA	NA	NA	NA	NA	NA	0	NA	NA	NA	NA	NA	NA	NA	NA	NA	0	NA	NA	NA	NA	NA	NA	NA	NA	NA	0	NA	NA	NA	NA	NA	NA	NA	NA	NA	0	NA	NA	NA	NA
F8VV52	-0.246662841906952	0.0583477682211104	0.0522037068327528	0.0571323598620387	4	-0.0197447517477625	0.151302051427116	0.0756510257135579	0.802821462937934	0.890616250444542	-0.363714621325649	-0.245356505455022	0.139361654044103	0.0341666031511916	4	-0.108885717396344	0.234984233593301	0.117492116796651	0.38981306263381	0.63253080426302	-0.169052868311023	-0.0852568851005318	0.0504490226873578	-0.0389941316158637	4	-0.0607137155850152	0.0915944574219455	0.0457972287109727	0.233173978012803	0.425543682189365	-0.0906703589400639	-0.00546821263951319	0.0622842782543427	-0.0951927188919706	4	-0.0322617530543013	0.0753408201595793	0.0376704100797897	0.424641903086879	0.653278612229839	-0.273542063652187	0.0108780537305176	0.0682252433072796	0.123428338538212	4	-0.0177526070190445	0.176608994669781	0.0883044973348903	0.847310394607245
F8VV59	NA	-0.24552605525398	-0.0313479439876367	-0.224773106762629	3	-0.167215702001415	0.118121577065916	0.0681975243161099	0.0326093126690476	0.122002416087291	NA	-0.0674279275202907	-0.0253946277815158	-0.266811096579277	3	-0.119877883960361	0.128971804281475	0.0744619059197814	0.112318592572422	0.339117010690371	NA	-0.141372082009812	0.122961522471726	-0.182744087498509	3	-0.0670515490121984	0.165851247238619	0.0957542622386516	0.440773907307723	0.630962184695762	NA	-0.215435287413888	0.28124202430647	-0.128941510246511	3	-0.0210449244513095	0.265336282694502	0.153191974239445	0.87600811855826	0.940809882591753	NA	-0.211288611398461	0.191115989255651	-0.0325806540637962	3	-0.017584425402202	0.201621007864885	0.116405943165075	0.863808758530714
F8VVM2	0.399433309565665	0.162878351692417	-0.134553226114625	0.328336391366782	4	0.18902370662756	0.237392667764716	0.118696333882358	0.162379775920383	0.336445553534831	-0.110528001448203	0.0596839903830486	-0.0398780236747497	0.0295548942453789	4	-0.0152917851236312	0.0759539588372849	0.0379769794186425	0.701152855622532	0.846817851596849	0.0576568481402036	0.105337453277102	0.0943923702749549	0.0791702134336078	4	0.0841392212814671	0.0206599389335063	0.0103299694667531	0.000184118156583377	0.0044925140849823	0.055080525192647	-0.0613214473730307	-0.0691361934437487	0.222392421336448	4	0.0367538264280789	0.136172698495672	0.0680863492478359	0.608762028058682	0.78260745452222	0.00209237896124004	-0.0457596613826829	-0.0551869212477275	0.356800227180964	4	0.0644865058779484	0.196482641549984	0.0982413207749922	0.535908480334037
F8VVT7	-0.0410661988162789	-0.254376972836245	0.0621386848904728	NA	3	-0.0777681622540172	0.161418140203272	0.0931948066984477	0.364369643873689	0.548550514656456	0.0316839880334311	-0.249266250506104	0.182976429704363	NA	3	-0.0115352775894367	0.219338465253172	0.126635121957558	0.917536678000272	0.957112966733893	0.0766900403028058	-0.157286571373185	0.294631649372852	NA	3	0.0713450394341576	0.226006518349097	0.130484924207461	0.542281337989089	0.71500310092966	0.091048247541484	-0.149377624038227	-0.00967605934904048	NA	3	-0.0226684786152611	0.120738362379187	0.0697083260211381	0.713515083793544	0.853901859979369	0.133882251516781	-0.153975958164373	0.302940364746368	NA	3	0.094282219366259	0.231017863909504	0.133378225915764	0.436726765075853
F8VWK8	0.10662598041174	0.196825683615755	0.0635523989094161	-0.163546307512183	4	0.0508644388561819	0.153348173532181	0.0766740867660907	0.531729988934148	0.699182147258778	0.169289256911296	0.272336852512852	0.191267803335754	0.0418201756946269	4	0.168678522113632	0.0954790345930167	0.0477395172965083	0.0123182395237923	0.0886619954295814	0.298812319322035	0.249727362612277	0.290439796426026	0.0931094043914815	4	0.233022220687955	0.0957074936331905	0.0478537468165953	0.00279588696180574	0.0246413011240197	0.186376137266454	0.0198746354749502	0.11488363788435	-0.0901978089715783	4	0.0577341504135441	0.119905563088273	0.0599527815441364	0.372739626440981	0.608418947478988	0.0331192745818646	0.341180583941628	0.271451722978751	0.0896034608899461	4	0.183838760598047	0.146092591331962	0.073046295665981	0.0454867993499863
F8VXU5	0.121589243752728	0.105230692692601	-0.0914368283733308	-0.0288308353748545	4	0.026638068174286	0.103619507217639	0.0518097536088197	0.625527102702524	0.769624921233101	0.103724575913014	0.148540425818019	-0.133418791514172	-0.10764072318797	4	0.00280137175722285	0.143966146753528	0.0719830733767642	0.970219078272046	0.982241216884258	0.0926731400390102	0.145808411155685	-0.182170420403486	-0.0344406453290296	4	0.0054676213655448	0.146174603625835	0.0730873018129176	0.94279817457549	0.967111938154634	0.113786228704105	0.0570732534291996	-0.165351508703052	-0.0427848664967964	4	-0.00931922326663597	0.122513858593014	0.0612569292965068	0.884068505922481	0.94519294568791	0.0971606363907784	0.0350578662256442	-0.137328873905174	-0.0412023632345874	4	-0.0115781836308346	0.101143265136763	0.0505716325683817	0.826514902209385
F8VZJ2	-0.0452378500339366	-0.0659922800841264	0.00883285437219538	0.0445022390453093	4	-0.0144737591751396	0.0504048737199134	0.0252024368599567	0.586634537510196	0.741026297206915	-0.105595705905972	-0.171160714614981	-0.0431163977412943	0.0645402521947105	4	-0.0638331415168843	0.100286641545083	0.0501433207725413	0.250111189191112	0.51129852528282	-0.0852212775075521	-0.0482626776183302	0.0798928005798398	0.0336375967002875	4	-0.00498838946143875	0.0752922385763087	0.0376461192881543	0.898915077862032	0.940609304387997	-0.0572672006728504	-0.101746501557828	0.0879165902840811	0.106803674014954	4	0.00892664051708916	0.104002395547326	0.0520011977736632	0.869346446879009	0.938919009973292	-0.0403428873591564	-0.0387323944887146	0.118966203499816	0.114399372737086	4	0.0385725735972578	0.0902155701000626	0.0451077850500313	0.425307665533114
F8VZX2	0.0503933690610617	0.188141262864705	NA	0.0548441832667685	3	0.0977929383975119	0.0782755851929284	0.0451924301821127	0.0490512670665309	0.158590353307083	0.184470333933926	0.320609963191383	NA	0.0433460299255871	3	0.182808775683632	0.138639434340917	0.0800435147370256	0.0412928730751103	0.189997496660667	0.330080621119762	0.110458846801831	NA	-0.218451974937621	3	0.0740291643279904	0.276074887590707	0.159391910666991	0.602730286024512	0.759505483389787	0.0409131932660531	0.181000249810469	NA	-0.170510629638253	3	0.0171342711460897	0.176957770232318	0.102166616278825	0.84902642745164	0.929696180738169	-0.0752133472062086	0.146533153088084	NA	-0.295901621630758	3	-0.0748606052496275	0.221217598283441	0.127720039918427	0.514827902910698
F8W0M9	0	0.0737524612194333	-0.147579906410865	-0.0471471420104582	4	-0.0302436468004724	0.0927063367570793	0.0463531683785397	0.53828253671068	0.70534378347481	0.069244785950457	0.368596154388647	-0.106068303369216	0.0357005693147287	4	0.0918683015711541	0.199519290384138	0.0997596451920689	0.392625800203802	0.635375006145431	0.048045253355912	0.401173323383522	0.0034187102274644	-0.177714349547875	4	0.0687307343547559	0.242175421268469	0.121087710634234	0.590889106323291	0.750166069436831	0.204496667834539	0.248406193908805	-0.0331668639351994	0.198099508034504	4	0.154458876460662	0.127066652069608	0.0635333260348042	0.0510826832575339	0.185604508999429	-0.330328089743764	0.071883440006409	-0.105035470698289	-0.0042081557523858	4	-0.0919220690470076	0.174676240884897	0.0873381204424485	0.33310576137011
F8W6I7	0.0965635504939877	0.0463850542324158	0.575579888230311	0.522993019005175	4	0.310380377990472	0.27745635214539	0.138728176072695	0.0665913413711237	0.192530131426631	-0.141742872113741	-0.313307612315018	0.324129003080633	0.249085042909799	4	0.0295408903904183	0.306520806335001	0.1532604031675	0.853513803997652	0.92711901885911	0.123202612924652	0.0877874581859595	0.537999021750569	0.388154205127896	4	0.284285824497269	0.215807349248416	0.107903674624208	0.0388185246040444	0.133199091802527	0.107002383723825	-0.0651230175328868	0.453105540112363	0.442871707475569	4	0.234464153444718	0.256409009394379	0.128204504697189	0.117178061661934	0.311547300267395	0.0207884726711451	0.132905189623789	0.671945802315796	0.580286013511683	4	0.351481369530603	0.32258453994966	0.16129226997483	0.0721450122429661
F8W6L0	-0.0244991837583122	0.0379517397915865	0.0550492601041532	0.041038383741738	4	0.0273850499697914	0.0353805534570844	0.0176902767285422	0.172583164724616	0.347812604641676	-0.184008599090751	0.239233410713761	0.0218594339637393	0.11039090377268	4	0.0468687873398574	0.177922307879225	0.0889611539396125	0.617201990077823	0.802150307826852	-0.153443959813929	0.184203789892695	0.11350119322266	-0.00741747156248301	4	0.0342108879347356	0.148022616907492	0.0740113084537461	0.660197157643823	0.796716969084741	0.00608989946437438	0.148542299439426	0.113101432542341	0.111146963921203	4	0.094720148841836	0.0615355096503659	0.0307677548251829	0.0217031722833786	0.105293507989622	-0.113210610447991	0.0135847994417419	0.107663554434315	0.113104895269451	4	0.0302856596743793	0.106013305224036	0.0530066526120181	0.588505015374859
F8W726	0.110381370924992	0.0971353886573841	0.159220634355222	0.104364319110567	4	0.117775428262041	0.0281557944040202	0.0140778972020101	0.000158612957943048	0.00342490694187025	-0.0242281550539822	-0.0708834861565099	0.178812804762826	0.225084017342714	4	0.077196295223762	0.146527851882849	0.0732639259414247	0.332603085614601	0.58627354391425	0.0286277995286713	0.199664835825255	0.286235728251796	0.258093664563523	4	0.193155507042311	0.115459415356731	0.0577297076783657	0.0154986898200235	0.0742512509127274	0.0181931167659697	0.105224875614312	0.179323699444562	0.218371903060765	4	0.130278398721402	0.0882358515210245	0.0441179257605122	0.0255148463496333	0.117220943031826	0.11079863840374	0.116631667374222	0.275786313242642	0.211949705624647	4	0.178791581161313	0.079570376431408	0.039785188215704	0.00413058761787229
F8W7Q4	0.291100687777592	0.246817170192313	0.169760918980846	NA	3	0.23589292565025	0.0614030879681392	0.0354510893674794	0.000506679960069225	0.00742561537661633	0.230053776770848	0.172119214855224	0.533174731775139	NA	3	0.31178257446707	0.193907113985612	0.111952324457377	0.020809483367853	0.12531288490243	0.296378759496953	0.139809670534241	0.0603305342013218	NA	3	0.165506321410839	0.120103828273747	0.0693419775845522	0.035706893237794	0.126100395161041	-0.0184254744701842	0.181000249810469	0.297026591401398	NA	3	0.153200455580561	0.159552884289445	0.0921179006944925	0.103544108027345	0.286642709310132	-0.0253481491292944	0.316184112352559	0.0698902118023897	NA	3	0.120242058341885	0.17624571695698	0.101755512128631	0.216947018881016
F8W809	-0.0592311221134365	0.0463850542324158	0.0248872895939009	0.037566191834933	4	0.0124018533869533	0.0485636049099347	0.0242818024549674	0.627770481930101	0.770190814478367	-0.0775576574601087	-0.0366947999806831	0.0751014552407187	0.0854276186685341	4	0.0115691541171152	0.0811673659361318	0.0405836829680659	0.78517551207225	0.893355406476535	-0.08839785502773	-0.0278628791766921	0.0271255001963813	0.0292943067940382	4	-0.0149602318035006	0.0556454126246652	0.0278227063123326	0.610133161755021	0.763108211826822	-0.0572672006728504	0.0500613560738262	0.0361883076152968	0.0506260730699679	4	0.0199021340215601	0.0518776919717632	0.0259388459858816	0.472023289312362	0.689384237288393	-0.01684918469222	0.058839092181686	-0.024662054234269	0.0576605683871918	4	0.0187471054105972	0.045727730515306	0.022863865257653	0.443592853252333
F8W8I6	0.0227622500838711	0.0172632235652258	-0.0511007912932887	0.374021667138096	4	0.0907365873734761	0.191822073915358	0.0959110369576788	0.380647496609765	0.563739988930164	-0.0207419792757346	0.0389941316158637	-0.0205989611798667	0.200676940180739	4	0.0495825328352504	0.104582683839645	0.0522913419198224	0.379637726820625	0.625419535792234	0.00497653146402599	0.0208216343171547	-0.0665438479401028	0.432685365098269	4	0.0979849207348366	0.226346958174317	0.113173479087159	0.419870381868892	0.614957664475361	0.0432840977288	0.00906788051836732	-0.00967605934904048	0.246283041544469	4	0.072239740110649	0.118082431723487	0.0590412158617437	0.266989672347329	0.508575790488958	0.0473732582621065	0.0189831033675729	-0.108797389494488	0.417836132631517	4	0.0938487761916771	0.226420050889498	0.113210025444749	0.438842685376352
F8W914	-0.308829388541536	0.0725733070541683	-0.159075545248694	-0.178274644662738	4	-0.1434015678497	0.158612016676442	0.0793060083382211	0.12057430937011	0.276552456165284	-0.291923938257639	-0.134542123378828	0.0311273140641325	-0.0807991109693287	4	-0.119034464635416	0.134340065531787	0.0671700327658935	0.126748685092951	0.363291764560205	-0.489020589163616	0.0971052195800032	-0.149533212611134	0.0972650338827926	4	-0.111045887077989	0.277528660764907	0.138764330382454	0.454077199704874	0.643240569216418	-0.313712789316969	-0.0997955951876664	-0.126934282039748	-0.153044374645713	4	-0.173371760297524	0.0960532812087275	0.0480266406043637	0.0112321826871089	0.0701863352281567	-0.204358498506186	0.0809448114605073	0.0430173502665173	-0.253541119907112	4	-0.0834843641715685	0.169872004832325	0.0849360024161627	0.363610401179002
F8W9P4	-0.187064790066716	-0.00995824516979849	-0.17232656874655	-0.0508384746192952	4	-0.10504701965059	0.0880035866262598	0.0440017933131299	0.0542229253060142	0.168464443165551	0.0703348464789981	-0.0865367504679953	-0.0759063328589638	0.00627259701553003	4	-0.0214589099581078	0.0739251364238143	0.0369625682119071	0.582670414134862	0.782154823236984	-0.1238097751848	-0.00552969262979758	-0.126931783674002	0.0917215302672387	4	-0.0411374303053401	0.105063158884884	0.0525315794424422	0.463348525937234	0.653617635981455	0.00851867956812349	0.04654258593703	0.0286447869468938	0.0980776693430532	4	0.0454459304487751	0.0383718771709559	0.0191859385854779	0.0556185355454746	0.193927142968823	0.0594798611187601	0.0509554931058528	-0.0624640869466534	0.151442714707809	4	0.049853495496442	0.0876156190407135	0.0438078095203567	0.298510699838573
F8W9T3	NA	NA	NA	NA	0	NA	NA	NA	NA	NA	NA	NA	NA	NA	0	NA	NA	NA	NA	NA	NA	NA	NA	NA	0	NA	NA	NA	NA	NA	NA	NA	NA	NA	0	NA	NA	NA	NA	NA	NA	NA	NA	NA	0	NA	NA	NA	NA
F8WAN9	0.157122382741671	-0.0288172724211145	0.116272122023951	0.0247628440289075	4	0.0673350190933538	0.0846842448301457	0.0423421224150729	0.16287916642304	0.337018288909549	0.184470333933926	0.0453919028140143	0.159222076404946	-0.00157241981875358	4	0.0968779733335331	0.0892608615103485	0.0446304307551742	0.0729943799720818	0.26811908949648	0.192021802760589	0.0647541018106269	0.217249118060488	0.0044322463152607	4	0.119614317236741	0.10173814589448	0.0508690729472401	0.0569481725299843	0.172072998907672	0.204496667834539	0.133694535032112	0.260460462169967	0.0445833624938842	4	0.160808756882626	0.0932427285053994	0.0466213642526997	0.0136455026032464	0.0796338887444285	0.122386612678952	0.069283988779027	0.169536814963208	-0.00842862207058074	4	0.0881946985876515	0.0763310944202317	0.0381655472101158	0.06019902455334
F8WCT1	0.0187713898878366	0.11557263691406	NA	0.420083449427461	3	0.184809158743119	0.209423289653331	0.120910592655928	0.127277435664321	0.285641936164248	0.513428630888817	-0.158238215822184	NA	-0.17523880133878	3	0.0599838712426177	0.392786669217435	0.226775489206783	0.764662406818129	0.881943706910035	0.444398189369829	0.261746038677147	NA	-0.201337954073774	3	0.168268757991067	0.332862273681928	0.192178123313332	0.343248246624018	0.544149558664642	0.249340094930756	0.079629377995373	NA	0.248913297589141	3	0.192627590171757	0.0978595550024983	0.0564992404234694	0.00958683861305014	0.0631394621508727	-0.00209541800219337	-0.11650125274571	NA	-0.327190210292776	3	-0.14859562701356	0.16490661793375	0.0952088802552015	0.121122241709214
F8WJN3	-0.00812025618938593	-0.0225034984889121	-0.129698386847162	0.132846695268042	4	-0.00686886156435467	0.10778611067365	0.0538930553368248	0.902745732306782	0.947240662535023	0.0170600534366497	-0.0148988763793384	-0.263349095559306	-0.0301730378993607	4	-0.0728402391003388	0.128521565712828	0.0642607828564142	0.30025101392113	0.561670058838847	-0.0414683274591894	-0.0233684984674858	-0.14574163344876	-0.061979668927311	4	-0.0681395320756866	0.0540858227189751	0.0270429113594876	0.0453065645733692	0.147747297416715	0.080698059371917	-0.055637808869448	-0.101879614019214	0.0745469533650539	4	-0.00056810253792269	0.09227342630994	0.04613671315497	0.990574749072917	0.995864471539652	0.0228509391280375	-0.0485801804450616	-0.0734491276404559	0.0291183318915976	4	-0.0175150092664706	0.0513087021728382	0.0256543510864191	0.520251992947079
G3V0E4	0.00538822303603131	0.0843217029296208	0.160542388951467	0.0594169130565926	4	0.077417306993428	0.0644713193376131	0.0322356596688065	0.0531784954152779	0.166935193811407	0.0406102039234796	-0.00825815100230884	0.0958600154075161	0.0402927059480332	4	0.04212619356918	0.0425502279222855	0.0212751139611427	0.095014842089994	0.311549595001804	0.120453748883962	0.0710724843516675	0.11508222904214	0.0580056034355654	4	0.0911535164283337	0.0312682954143022	0.0156341477071511	0.00112052093606587	0.0135704857942272	0.174528631007053	0.158356589266381	0.102361717629678	0.0566435793576927	4	0.122972629315201	0.053958003672767	0.0269790018363835	0.00385870817776219	0.037161163748267	0.150955764875723	0.0627647953954863	0.186518975145554	0.0111621062873001	4	0.102850410426016	0.0802665465748735	0.0401332732874368	0.0427517356407376
G3V0I5	0.0438623708506672	0.0427768113155672	-0.116831456154847	-0.0669442971312739	4	-0.0242841427799715	0.0806763345440678	0.0403381672720339	0.569199857004264	0.729876087889485	0.133232880822274	0.226621134791635	-0.0479876292939905	-0.0366064712621892	4	0.0688149787644324	0.133926572370311	0.0669632861851556	0.343747021257691	0.597232118885592	0.155786821996243	0.110458846801831	-0.0241605294463319	-0.0329260047270312	4	0.0522897836561777	0.0952219474274909	0.0476109737137454	0.314192308923473	0.512598894895198	0.0853073126245066	0	0.0134383743248046	0.0641303374197155	4	0.0407190060922567	0.0405728884877183	0.0202864442438592	0.0915084793481079	0.267275490888242	0.10107038144186	0.0443527582816059	0.0814914980811531	-0.0688494077558877	4	0.0395163075121827	0.0759766195226029	0.0379883097613015	0.338326396060466
G3V180	0.00269662702976528	-0.0453635813009973	-0.028332906232205	-0.122830317780478	4	-0.0484575445709789	0.0534248142845391	0.0267124071422696	0.119602730822302	0.275599549541618	-0.0103337133956014	-0.00164785288148225	-0.0561430780375339	-0.065917310969075	4	-0.0335104888209231	0.0322222837206124	0.0161111418603062	0.0827396667570523	0.288159000698812	-0.0642209788950001	0.0262514301164586	-0.0137564335806677	-0.0759488532332984	4	-0.0319187088981269	0.0472430720663899	0.0236215360331949	0.225337280028861	0.419713245549752	0.00365702360808914	-0.00182043562436884	-0.00579784453811277	-0.105234720277594	4	-0.0272989942079966	0.0521015317166116	0.0260507658583058	0.335043648713264	0.576130233253809	-0.0253481491292944	-0.0429446457756289	-0.0353619428914778	-0.0955392858406192	4	-0.0497985059092551	0.0313338403109397	0.0156669201554699	0.0191102447907538
G3V1J0	-0.204065142592918	-0.0608073866655514	-0.121643117227238	-0.00238068542618153	4	-0.0972240829779724	0.086280061587811	0.0431400307939055	0.0651105411936464	0.190618433377252	0.244611872461017	0.27778099120298	0.00314312769398013	0.0645402521947105	4	0.147519060888172	0.134319367338122	0.0671596836690609	0.0704369621300923	0.262692821074674	0.0814093609680632	-0.0899485804252538	-0.15333478277099	-0.0884804850419186	4	-0.0625886218175249	0.100646643743277	0.0503233218716383	0.259986545812974	0.458006601394301	-0.0221389772692486	-0.111540802860766	-0.0998112336779845	-0.00782799012702305	4	-0.0603297509837555	0.0529034636548961	0.0264517318274481	0.0627352559838087	0.209556551203374	-0.131443965825002	-0.181573516728403	-0.075288127304237	0.0441394287335729	4	-0.0860415452810172	0.0970402997959227	0.0485201498979613	0.126541990011162
G3V1V0	-0.0776276789193525	-0.0646943087497109	0.0146915224880124	-0.0119429079444338	4	-0.0348933432813712	0.0435878514450512	0.0217939257225256	0.160482640749043	0.335456114621931	-0.106827199827005	-0.259087221317131	0.0494863534260549	0.0675427403562339	4	-0.0622213318404617	0.152821446225048	0.0764107231125238	0.446578939288301	0.680790788435973	-0.0363469339344605	-0.0981959408080298	0.0187034386784081	0.0191088229477046	4	-0.0241826532790944	0.055795176768804	0.027897588384402	0.419342022193446	0.614777368133263	-0.0828930083483447	-0.133325218752861	0.0210616155278296	-0.063846482024626	4	-0.0647507733995005	0.064281099038432	0.032140549519216	0.0905737973677898	0.266346876889911	-0.0576727658970735	-0.0485801804450616	0.0531534226930545	0.0055918482443539	4	-0.0118769188511817	0.0515703149866845	0.0257851574933423	0.661300146319971
G3V2I9	NA	NA	NA	NA	0	NA	NA	NA	NA	NA	NA	NA	NA	NA	0	NA	NA	NA	NA	NA	NA	NA	NA	NA	0	NA	NA	NA	NA	NA	NA	NA	NA	NA	0	NA	NA	NA	NA	NA	NA	NA	NA	NA	0	NA	NA	NA	NA
G3V2S6	-0.039678324692036	0.0866599449988217	0.123067683532804	-0.309198785516815	4	-0.0347873704193063	0.195783225915815	0.0978916129579076	0.734474305477095	0.843823628967964	0.057199444289864	-0.284939099161876	0.07808531367954	-0.17523880133878	4	-0.081223285632813	0.177838064775586	0.0889190323877932	0.396225865015401	0.636470940092749	-0.154553298615908	-0.126835988851931	0.124532230346952	-0.21501289097085	4	-0.0929674870229342	0.149600685478038	0.074800342739019	0.260279867484477	0.458256283870457	-0.0147215057067656	-0.0480942882010451	0.111317022864158	-0.0985322922371026	4	-0.0125077658201888	0.0894503561711301	0.044725178085565	0.789130307346871	0.896819894402102	0.158479615257535	-0.0275594825694574	0.0362201879127533	-0.131911675505581	4	0.00880716127381253	0.121487504597504	0.0607437522987521	0.889467617975628
G3V2U7	NA	NA	NA	NA	0	NA	NA	NA	NA	NA	NA	NA	NA	NA	0	NA	NA	NA	NA	NA	NA	NA	NA	NA	0	NA	NA	NA	NA	NA	NA	NA	NA	NA	0	NA	NA	NA	NA	NA	NA	NA	NA	NA	0	NA	NA	NA	NA
G3V325	-0.20562060909496	-0.0582219109899036	0.157897667695904	0.0398819147091599	4	-0.01651573441995	0.153948896775144	0.076974448387572	0.837215868863156	0.911365235070879	0.0450526863895756	-0.0674279275202907	0.296213188485175	0.0326310042399664	4	0.0766172378986066	0.154814405938223	0.0774072029691116	0.360495421680706	0.608134854766057	0.0188201816020872	-0.145029105617901	0.202452116132408	0.0307435234311079	4	0.0267466788869255	0.141960234978428	0.070980117489214	0.719274832163516	0.837069867190747	-0.130198723126701	-0.350406285573376	0.111317022864158	-0.00782799012702305	4	-0.0942789939907356	0.1971758222588	0.0985879111293999	0.375851054441472	0.61111011245256	-0.263453246028604	-0.104712055042102	0.189585278193338	-0.0197439352984149	4	-0.0495809895439457	0.188742796689246	0.094371398344623	0.618159001168814
G3V3E8	0.0516960283286979	0.0270359623124031	0.0593070941073101	-0.0870168997576677	4	0.0127555462476859	0.0679261339439177	0.0339630669719588	0.720155431086089	0.834750716324097	-0.145534451276116	-0.182330022333093	0.176030364091499	-0.00629998835573825	4	-0.0395335244683619	0.162480044169669	0.0812400220848343	0.643787241086213	0.815370669751535	-0.0110091727086734	0.04349070966687	0.135479562318154	-0.0666210510781792	4	0.0253350120495429	0.0860973646935752	0.0430486823467876	0.577649660574923	0.738942774022014	-0.0559977812852845	-0.0862126229147414	0.041820175694627	-0.0605861528610393	4	-0.0402440953416095	0.0563016519381282	0.0281508259690641	0.202772133544872	0.435546459202936	-0.138341325771673	-0.00958604882919789	0.0831412353002459	-0.00280407287670262	4	-0.0168975530443319	0.0913024888029247	0.0456512444014623	0.723989337823271
G3V3G9	NA	NA	NA	NA	0	NA	NA	NA	NA	NA	NA	NA	NA	NA	0	NA	NA	NA	NA	NA	NA	NA	NA	NA	0	NA	NA	NA	NA	NA	NA	NA	NA	NA	0	NA	NA	NA	NA	NA	NA	NA	NA	NA	0	NA	NA	NA	NA
G3V3H3	0.056894935003017	-0.0212440527163137	-0.0773463687081488	-0.0731870374687384	4	-0.028720630972546	0.0625237235955382	0.0312618617977691	0.393679851610552	0.574614961203101	0.0725124997843681	-0.114791167171196	-0.00947067979300364	0.0433460299255871	4	-0.00210082931356106	0.0824337973494206	0.0412168986747103	0.961003844745544	0.976837465590376	0.0499727019270264	0	-0.0647527924141147	-0.0223678130284545	4	-0.00928697587888572	0.0477686174494257	0.0238843087247129	0.710824571818362	0.83375974813119	0.0133640075176957	0.0126791340707462	-0.112266232250912	-0.0524674198941356	4	-0.0346726276391515	0.0602415409338862	0.0301207704669431	0.293481202289665	0.537042175860568	0.0574691359976134	0.0257027011739413	-0.120142363088497	-0.0042081557523858	4	-0.0102946704173321	0.0774409570086954	0.0387204785043477	0.799238021978341
G3V4E1	NA	-0.0212440527163137	-0.302858131888776	-0.0908118034123985	3	-0.138304662672496	0.146691176140772	0.0846921900326175	0.10841430918231	0.259490464495743	NA	0.243413119212052	-0.164820890653306	0.214287371699392	3	0.0976265334193797	0.227752201073521	0.131492794598327	0.415506448737103	0.653525491431978	NA	0.352724813567166	0.0119302100829818	-0.0481444479618765	3	0.105503525229424	0.216196704855396	0.124821225746173	0.358736428800294	0.56052391577918	NA	0.074455331657436	0.0969617298870881	-0.068750832495644	3	0.0342220763496267	0.089884367146686	0.0518947635680783	0.466289871866198	0.684601400025021	NA	0.189057769734641	0.117356950638159	0.0935470488786503	3	0.133320589750483	0.049716222502209	0.0287036744447417	0.00260613215415108
G3V4K3	-0.00270167689606567	-0.0790366279088495	0.026337963462626	0.181900919581587	4	0.0316251445598246	0.109597933982229	0.0547989669911146	0.584851243878069	0.741026297206915	-0.120443470313285	-0.0571106365347774	0.162037092012	0.178629595490404	4	0.0407781451635851	0.151966418908209	0.0759832094541043	0.610799170497331	0.799280314686867	-0.0969030825551875	-0.138939206153526	0.0321552381470159	0.0408474819752075	4	-0.0407098921466226	0.0908618094781249	0.0454309047390625	0.404723224086365	0.600922547354166	-0.0803098473343422	-0.00364317123118663	0.104157231291292	0.180296685514751	4	0.0501252245601285	0.115135304988731	0.0575676524943656	0.417379296201127	0.648935602695364	-0.0274807364221068	0.0283818013698226	0.00523032007630503	-0.0340140322650537	4	-0.0069706618102582	0.029158575971368	0.014579287985684	0.649486038429781
G3V4X8	0.00807480675633204	-0.34128503805941	-0.185700430829922	-0.115080818175544	4	-0.158497870077136	0.145811093718073	0.0729055468590363	0.0726583292992547	0.20225242124461	0.199493326754986	-0.0917924759194906	-0.170121674476615	-0.20753929324209	4	-0.0674900292208025	0.184406952367543	0.0922034761837717	0.491777081064524	0.711312017252658	0.336411712095764	-0.14015513124943	-0.270240175566646	-0.109079446221785	4	-0.0457657602355242	0.264175673677794	0.132087836838897	0.740809657120585	0.84841194587155	0.504652653386814	-0.0670275657182469	-0.169683929499085	0.0139842294357012	4	0.0704813469012959	0.299045542069845	0.149522771034923	0.654024288214134	0.81262450607124	0.175266172281901	-0.0123366598452326	-0.46841085015464	-0.115127091210017	4	-0.105152107231997	0.270373527657721	0.13518676382886	0.466224693909392
G3V599	NA	-0.133786832022657	0.116272122023951	-0.0459187936681482	3	-0.0211445012222846	0.12685698364444	0.0732409136557016	0.744090912616837	0.847472949273384	NA	-0.123735368422245	0.014090459665182	0.123433941248279	3	0.00459634416373877	0.12385786443588	0.0715093713733076	0.941742453196497	0.967670780425904	NA	-0.0852568851005318	0.202452116132408	-0.0635251377852142	3	0.0178900310822206	0.160204368351486	0.0924940351930844	0.826338088923619	0.898245250922725	NA	-0.133325218752861	0.155278225477911	-0.036365745602519	3	-0.00480424629248964	0.146867570227361	0.084794031205993	0.948633881908828	0.972181072716892	NA	-0.107650335163444	0.118966203499816	-0.217265733515562	3	-0.0686499550597302	0.171475220085743	0.099001264475854	0.444965672527718
G3V5T0	NA	NA	NA	NA	0	NA	NA	NA	NA	NA	NA	NA	NA	NA	0	NA	NA	NA	NA	NA	NA	NA	NA	NA	0	NA	NA	NA	NA	NA	NA	NA	NA	NA	0	NA	NA	NA	NA	NA	NA	NA	NA	NA	0	NA	NA	NA	NA
G3V5V3	0.0438623708506672	0.0475857992379669	0.0364520412268232	0.060557834461162	4	0.0471145114441548	0.0100864551999118	0.00504322759995592	8.52640911915152e-05	0.00223123613590161	0.0908910290992226	-0.107675517526146	0.054039839712889	0.0295548942453789	4	0.0167025613828362	0.0866661988480316	0.0433330994240158	0.713201923224585	0.849156917647861	0.0528590550889637	0.0836268351411176	-0.0137564335806677	-0.0420377931685881	4	0.0201729158702064	0.0580693741460344	0.0290346870730172	0.513181188861434	0.692874825336362	-0.00122107078037506	-0.00364317123118663	0.0474301440372107	-0.0315700790008699	4	0.0027489557561948	0.0328167900674034	0.0164083950337017	0.872454373648124	0.939925007675794	0.103021287812021	-0.094474946415711	0.00348898607987985	0.0750507052612608	4	0.0217715081843627	0.0881054072352919	0.0440527036176459	0.638724831620946
G5E9D5	-0.31385328813103	-0.141976229836004	-0.0726799655857322	-0.349546071812567	4	-0.219513888841333	0.133392379154213	0.0666961895771064	0.0165878955975048	0.0764408664500869	0.163171812942961	0.0180032346998905	0.0691151601749875	-0.276296305242716	4	-0.00650152435621947	0.189645837795722	0.0948229188978611	0.947563853827059	0.970426563098829	-0.0180590054359081	-0.329675612766979	-0.0381504091642775	-0.57611158313889	4	-0.240499152626514	0.265212353671879	0.132606176835939	0.119670966201329	0.275580195085206	-0.221172383174192	-0.269233281968737	0.0915414541028352	-0.287599551430326	4	-0.171615940617605	0.177659786018609	0.0888298930093046	0.101567594309898	0.283246160146515	0.45428287665755	-0.0973924297980053	0.0447116488063929	-0.43288937523605	4	-0.00782181989252817	0.367426108976003	0.183713054488002	0.967420801412328
G5EA06	0.136398903731872	-0.311730143814032	0.19319871851493	NA	3	0.00595582614425658	0.276586037917862	0.15968702344597	0.966169013713845	0.98067540256163	0.00114363465432932	-0.594877969586239	0.236037673455777	NA	3	-0.119232220492044	0.428337438638799	0.247300735502106	0.58940612635713	0.785961499769566	-0.00199542914368345	0.21686272870665	0.129234119487256	NA	3	0.114700473016741	0.110150549132575	0.0635954491930773	0.0836392450590602	0.221402309819211	0.0266053565821696	0.245339890861021	0.0678153842275716	NA	3	0.113253543890254	0.116231101202282	0.0671060575673441	0.0997305307896974	0.280974272672186	0.0932402670194355	-0.217623177188576	-0.003497444236227	NA	3	-0.0426267848017891	0.159082837559677	0.0918465190885291	0.602987079346384
G5EA09	0.0762256624517306	-0.0869202269846827	-0.0163353731326121	0.0421939264874471	4	0.00379099720547073	0.0715429071346609	0.0357714535673304	0.919053992299206	0.955161573412811	-0.110528001448203	-0.174874217414046	-0.186141895067087	0.119099350984388	4	-0.0881111907362368	0.142099218614492	0.071049609307246	0.261221700054467	0.520726357229962	-0.0915814422869928	-0.218901213394832	-0.0576107231700951	0.106915203916512	4	-0.0652945437338519	0.134165629334464	0.0670828146672322	0.367973543766053	0.569577072608694	-0.0496673848146897	-0.217549126679806	-0.0174639057414858	0.128390536223099	4	-0.0390724702532205	0.1419823436231	0.0709911718115499	0.601928422926514	0.778295201878737	0.116604260084946	-0.055655697525183	-0.0264398672021722	0.0843285188492718	4	0.0297093035517156	0.0836140038826051	0.0418070019413026	0.503986273726238
G5EA36	NA	NA	NA	NA	0	NA	NA	NA	NA	NA	NA	NA	NA	NA	0	NA	NA	NA	NA	NA	NA	NA	NA	NA	0	NA	NA	NA	NA	NA	NA	NA	NA	NA	0	NA	NA	NA	NA	NA	NA	NA	NA	NA	0	NA	NA	NA	NA
G8JLA2	NA	NA	NA	NA	0	NA	NA	NA	NA	NA	NA	NA	NA	NA	0	NA	NA	NA	NA	NA	NA	NA	NA	NA	0	NA	NA	NA	NA	NA	NA	NA	NA	NA	0	NA	NA	NA	NA	NA	NA	NA	NA	NA	0	NA	NA	NA	NA
G8JLB3	-0.267630271370385	-0.044084029074425	0.0350115068676081	-0.220609481821093	4	-0.124328068849574	0.143333920200669	0.0716669601003343	0.133465845252324	0.293858157463784	0.523014679718015	0.0675632838126346	0	-0.0544477840223764	4	0.134032544877068	0.264080051853056	0.132040025926528	0.349233869555354	0.598217580020215	0.0547800873846398	-0.0323713048484387	0.0815110789782225	-0.149539053493569	4	-0.0114047979947863	0.104138475435672	0.0520692377178361	0.833886316094678	0.903526284428033	-0.0738721077769312	0.12036700338512	-0.0233325038306239	-0.154781515181771	4	-0.0329047808510515	0.115637549519851	0.0578187747599254	0.589939258368073	0.769364270080537	-0.338247753040002	0.0403765636446262	-0.0122783297784367	-0.05860191131147	4	-0.0921878576213207	0.168950038323591	0.0844750191617956	0.317012211884653
G8JLD5	-0.118066223376752	-0.00372629145828404	0.02198155841849	-0.106092034948289	4	-0.0514757478412088	0.0709300516405866	0.0354650258202933	0.196854485415526	0.377117306344191	-0.115477217419936	0.00821114931924022	0.0810630134794356	0.046392905484451	4	0.00504746271579772	0.0856816141895504	0.0428408070947752	0.910056253622012	0.952596971848803	-0.141297201913641	-0.0110806615437338	0.0701448240282776	0.00737953036559753	4	-0.0187133772658749	0.0888100448156362	0.0444050224078181	0.688125230742654	0.818011235758963	-0.131535170689516	0.0518175279777043	0.0248581836159087	-0.0589587471149937	4	-0.0284545515527241	0.0833506138186269	0.0416753069093135	0.520230135202938	0.721881970702738	-0.0818464395386557	0.00952277411850674	0.0962716562290207	0.0055918482443539	4	0.00738495976330642	0.0727343864782697	0.0363671932391349	0.845794446115782
H0Y2W2	-0.0382917844210735	-0.0199857054573934	-0.10566626467747	-0.109937514899584	4	-0.0684703173638803	0.0460599913530284	0.0230299956765142	0.024857792807603	0.101054053684029	-0.0114864861624001	-0.0115746927867733	0.00784501683428361	-0.102569733640548	4	-0.0294464739388594	0.0495971374038281	0.024798568701914	0.27993268775187	0.5390041497286	-0.03226286881248	-0.0574226769038061	-0.0629639576643018	-0.113875112823434	4	-0.0666311540510056	0.0342121569593654	0.0171060784796827	0.00802858860055944	0.0484439587614595	0.0193978726112532	0.0323810485132946	-0.0233325038306239	-0.0736719118806994	4	-0.0113063736466939	0.0479076533888263	0.0239538266944131	0.653598633881797	0.812429551901592	0.0412816445352248	-0.0233918483542284	-0.0882271830117352	-0.0955392858406192	4	-0.0414691681678395	0.0639905619914672	0.0319952809957336	0.242559715014279
H0Y368	-0.0890663516541997	-0.129709499942114	-0.0726799655857322	-0.0508384746192952	4	-0.0855735729503352	0.0333314252192399	0.01666571260962	0.0021470955617064	0.0190086228316356	-0.203637405839684	-0.22404027421793	-0.126532405928932	-0.0642732138784498	4	-0.154620824966249	0.0734241904920008	0.0367120952460004	0.00561249054494138	0.0545586618647648	-0.176921111644362	-0.284609065038911	-0.0399087214366363	-0.113875112823434	4	-0.153828502735836	0.103619197061903	0.0518095985309516	0.0249862337398852	0.0991251766347413	-0.153088438646428	-0.135322028816808	-0.0998112336779845	-0.108597647303558	4	-0.124204837111194	0.02447098044088	0.01223549022044	5.31663357142795e-05	0.00232930192556909	-0.108688051757297	-0.135866577612641	0.0430173502665173	-0.0762138701021955	4	-0.069437787301404	0.0788362029899443	0.0394181014949722	0.128615351688318
H0Y3U8	NA	0.253076160663995	0.171073056443637	0.204784810254926	3	0.209644675787519	0.0412169988619975	0.0237966453881628	0.00013339245040663	0.00306777810267285	NA	0.126079748379575	0.250657462728553	0.250406797506045	3	0.209048002871391	0.0718527254063996	0.0414841903553931	0.001814757012815	0.0287225677996846	NA	0.199664835825255	0.173912709918481	0.394922137981768	3	0.256166561241835	0.120853736204154	0.0697749371300403	0.00710067251562299	0.0446264719640921	NA	0.151821153216435	0.0622842782543427	0.277533975528909	3	0.163879802333229	0.108130320946946	0.06242906990628	0.0257375637210502	0.117885841104144	NA	0.151457031727369	0.169536814963208	0.226388809046743	3	0.182460885245773	0.0391020013242493	0.0225755509904084	0.000201733473144459
H0Y4R1	0.0359859452400363	0.0318976182724375	0.0507788227259249	0.110987261304302	4	0.0574124118856752	0.036625888664585	0.0183129443322925	0.0201939465240019	0.0878364033698674	0.0204479885534172	0.0517614276897416	-0.0253946277815158	0.00627259701553003	4	0.0132718463692933	0.032026190332505	0.0160130951662525	0.438930318779631	0.674230870767696	0.0178357427778857	0.049902698181104	0.00682933839011635	0.00590664096672198	4	0.020118605078957	0.0205822593127965	0.0102911296563983	0.0983820176149137	0.246403346520202	0.046833164809871	0.0761820763769042	0.00385232549560655	0.0551415541924609	4	0.0455022802187106	0.0303899954879943	0.0151949977439971	0.0241774998551247	0.112443972403142	0.0534392589614605	0.0230186166027298	-0.0211129871531984	0.0495631006885952	4	0.0262269972748968	0.0343338935592934	0.0171669467796467	0.177431605753458
H0Y4R4	NA	NA	NA	NA	0	NA	NA	NA	NA	NA	NA	NA	NA	NA	0	NA	NA	NA	NA	NA	NA	NA	NA	NA	0	NA	NA	NA	NA	NA	NA	NA	NA	NA	0	NA	NA	NA	NA	NA	NA	NA	NA	NA	0	NA	NA	NA	NA
H0Y5F3	NA	NA	NA	NA	0	NA	NA	NA	NA	NA	NA	NA	NA	NA	0	NA	NA	NA	NA	NA	NA	NA	NA	NA	0	NA	NA	NA	NA	NA	NA	NA	NA	NA	0	NA	NA	NA	NA	NA	NA	NA	NA	NA	0	NA	NA	NA	NA
H0Y5F5	-0.118066223376752	0.0761078822175631	-0.0389132211078218	0.0071185754997018	4	-0.0184382466918272	0.081521121941797	0.0407605609708985	0.666907778426453	0.798940224839687	-0.115477217419936	0.00164597284355963	-0.102685663974564	-0.128104825747685	4	-0.0861554335746565	0.0594470464577416	0.0297235232288708	0.0273858500490874	0.150249409615955	0.0624387386331043	0.0509685977795637	-0.140072883362068	-0.112274785381592	4	-0.034735083082748	0.106295704115912	0.053147852057956	0.537623720299873	0.711886336603818	0.0621123589718855	0.0108746372239983	0.0248581836159087	-0.0395717359016103	4	0.0145683609775456	0.0420757486780951	0.0210378743390475	0.514527659414082	0.718105777658713	-0.0446558802302389	0.0562160095665481	0.00696955481484174	-0.05860191131147	4	-0.0100180567900798	0.0523949750357834	0.0261974875178917	0.715339824798361
H0Y5K5	0.025416703529849	0.227875606538853	-0.0404310487500751	0.0932580668719972	4	0.076529832047656	0.114713813234701	0.0573569066173504	0.230519224453086	0.416532944125331	-0.0312258811788019	0.328500748810849	0.00314312769398013	0.0554951125917035	4	0.0889782769794326	0.163614230535359	0.0818071152676796	0.318495068481631	0.573329751726955	0.0691068688837416	0.299905184928013	-0.0576107231700951	0.0833661302280864	4	0.0986918652174365	0.14835481042265	0.0741774052113251	0.231690288603746	0.424879348733007	0.0133640075176957	0.327375659727033	-0.00773564877960531	0.111146963921203	4	0.111037745596581	0.153242056173559	0.0766210280867796	0.197461399456626	0.431616638147057	0.0634929236253834	0.107792370325429	-0.148901356069921	-0.00842862207058074	4	0.00348882895257756	0.112315796233213	0.0561578981166066	0.952480844290728
H0Y764	-0.182462888107707	NA	-0.126470879816766	0.0282659498558595	3	-0.0935559393562048	0.109152213749931	0.063019059991166	0.136174395704137	0.297653794803764	0	NA	0.0311273140641325	0.108934371553164	3	0.0466872285390988	0.0561093355001812	0.0323947399550806	0.145580697617055	0.388158955865273	-0.0852212775075521	NA	-0.0827642003984333	0.135484356113283	3	-0.0108337072642342	0.12672111528822	0.0731624700236634	0.866465138503027	0.923598065477662	-0.058537737999255	NA	-0.0155129993713246	0.25938662881865	3	0.06177863048269	0.172480354789347	0.0995815792675514	0.491728079490941	0.70282457491401	-0.330328089743764	NA	-0.0425395449645249	0.175206759402638	3	-0.0658869584352172	0.253574835526314	0.146401499550833	0.613713213256487
H0Y7A7	-0.107849827333615	-0.121589243752728	0	-0.0594884922122266	4	-0.0722318908246424	0.0550291618129963	0.0275145809064982	0.0393102809959065	0.137699860313587	-0.165926240107293	-0.274941172517968	0.0988012907196386	0.057006579509303	4	-0.07126488559908	0.178718470393256	0.0893592351966281	0.455548555183921	0.685135961353728	-0.0937077433953807	-0.0482626776183302	0.150975898641322	-0.0435620352975779	4	-0.0086391394174916	0.108786122266688	0.0543930611333439	0.879015647290586	0.931132671070281	-0.14092512971976	-0.243159770358844	0.0474301440372107	-0.255559285271647	4	-0.14805351032826	0.140080173802198	0.0700400869010988	0.0789527106288282	0.243793712186872	-0.108688051757297	-0.153975958164373	0.164870411840791	-0.0440877542781624	4	-0.0354703380897602	0.140967007402997	0.0704835037014984	0.632729980172167
H0Y7W6	NA	NA	NA	NA	0	NA	NA	NA	NA	NA	NA	NA	NA	NA	0	NA	NA	NA	NA	NA	NA	NA	NA	NA	0	NA	NA	NA	NA	NA	NA	NA	NA	NA	0	NA	NA	NA	NA	NA	NA	NA	NA	NA	0	NA	NA	NA	NA
H0Y984	NA	NA	NA	NA	0	NA	NA	NA	NA	NA	NA	NA	NA	NA	0	NA	NA	NA	NA	NA	NA	NA	NA	NA	0	NA	NA	NA	NA	NA	NA	NA	NA	NA	0	NA	NA	NA	NA	NA	NA	NA	NA	NA	0	NA	NA	NA	NA
H0Y990	0.384003268996059	-0.00746223236572846	0.159220634355222	0.137179116064075	4	0.168235196762407	0.161731454456039	0.0808657272280194	0.082685998407019	0.217377241280612	0.276131786468632	-0.0674279275202907	0.195395688958431	0.170274195451251	4	0.143593435839506	0.147751781200062	0.0738758906000312	0.0999263440174969	0.320318866289292	0.2024572554269	-0.0267379707057507	0.175428942365861	0.042285145313799	4	0.0983583431002023	0.108887942486148	0.0544439712430739	0.12084316838548	0.276958982584765	0.305726142625966	0.169722844216326	0.328086887766138	0.135514970656481	4	0.234762711316228	0.0963076819915267	0.0481538409957634	0.00277951738635013	0.0288745053571699	0.424949382699383	0.00680838942147076	0.285849996587339	0.225191054689121	4	0.235699705849329	0.174003983033188	0.0870019915165939	0.0351466935655065
H0YA96	0.701996079586097	0.510722505748233	0.190613242839282	0.528775371599181	4	0.483026799943198	0.213161298655968	0.106580649327984	0.00396660450463495	0.0297175055846534	0.410453873371132	0.173580171983504	0.334147758905624	0.473931188332412	4	0.348028248148168	0.129580487588062	0.0647902437940312	0.00170917874591554	0.0280313909729527	0.441464390614244	0.331828442827171	0.255025768863445	0.51885789677249	4	0.386794124769337	0.116638763786263	0.0583193818931315	0.000566625625021387	0.0094335065121625	0.450304129403755	0.239187663879426	0.237740385669884	0.455451767724752	4	0.345670986669454	0.123811183006089	0.0619055915030443	0.00140157445271756	0.0185831560112508	0.776210971544912	0.445091215357615	0.272898033917815	0.548077432601347	4	0.510569413355422	0.210354754293715	0.105177377146858	0.00283903797753259
H0YB09	0.0477845165583034	-0.109493918720713	0.00883285437219538	0.108782990377572	4	0.0139766106468395	0.0920192986836327	0.0460096493418164	0.771557639336096	0.86803823733272	0.214361493810267	-0.165608321459194	0.057067532410457	0.216994117410617	4	0.0807037055430368	0.180432595039277	0.0902162975196386	0.405476224173409	0.644794647909635	-0.0809966916458267	-0.0528354074081543	-0.113909302880413	-0.0223678130284545	4	-0.0675273037407121	0.0391064601396869	0.0195532300698435	0.0135745497691083	0.0685492442900924	0.00365702360808914	0.164862553125791	-0.095683348055308	-0.220571985712079	4	-0.0369339392583766	0.162833120857215	0.0814165604286077	0.666032335847647	0.822137913951587	-0.0296164807660979	-0.107650335163444	-0.110682033839431	-0.0806506599882386	4	-0.082149877439303	0.0375338190257443	0.0187669095128722	0.00468146362262148
H0YBZ2	NA	NA	NA	NA	0	NA	NA	NA	NA	NA	NA	NA	NA	NA	0	NA	NA	NA	NA	NA	NA	NA	NA	NA	0	NA	NA	NA	NA	NA	NA	NA	NA	NA	0	NA	NA	NA	NA	NA	NA	NA	NA	NA	0	NA	NA	NA	NA
H0YC42	0.0633673327628243	NA	-0.25978940999689	0.290911541500293	3	0.0314964880887425	0.276730369764786	0.159770353476644	0.823072359249046	0.900850015209944	0.029443777892482	NA	-0.0142294363041394	0.63338308755259	3	0.216199143046977	0.361951198470888	0.208972621870675	0.271163641150424	0.529829451803066	0.121370618975762	NA	-0.27230559473243	0.39717107848533	3	0.082078700909554	0.336463438005783	0.194257256505106	0.635014627911087	0.779394730075199	-0.151731884676343	NA	-0.261492241025388	0.472431505202683	3	0.0197357931669841	0.39586852581141	0.228554799940918	0.921809276867242	0.963537086441162	0.210075741286181	NA	-0.368069876532083	0.291923938257639	3	0.0446432676705789	0.359755314603002	0.207704827728442	0.807494010758844
H0YD13	0.268870740394127	0.239480528673882	0.260078062502382	0.352757593669058	4	0.280296731309862	0.0498527391698549	0.0249263695849275	2.95576191556944e-05	0.00109799353165199	0.289298586186566	0.132103536007345	0.214504511906135	0.27399361782366	4	0.227475062980927	0.0712977029051918	0.0356488514525959	0.000696613497974761	0.0158335534163737	0.314931984685312	0.220656800691859	0.289039801128499	0.312724741057356	4	0.284338331890756	0.0440424077661406	0.0220212038830703	1.32743478253911e-05	0.000780543056898886	0.294822864724764	0.204873299354091	0.28124202430647	0.333126301492226	4	0.278516122469388	0.0537862356404375	0.0268931178202187	4.74189341736471e-05	0.00223980371885836	0.366055693645815	0.259162008198989	0.239260437217528	0.338085111095055	4	0.300640812539347	0.0610170026813711	0.0305085013406856	6.29711664570489e-05
H0YD64	0.307551208558186	0.28193102333618	0.069193442424423	0.037566191834933	4	0.174060466538431	0.140337230748179	0.0701686153740897	0.0477663109991878	0.15593688785156	0.068153901179472	0.144076177673421	0.0494863534260549	-0.124673920347412	4	0.034260627982884	0.113578493107981	0.0567892465539907	0.568402067632158	0.77434855811267	0.26767970206714	0.117598391444083	-0.0399087214366363	-0.19624308695101	4	0.0372815712808941	0.200021830111172	0.100010915055586	0.722129727614777	0.837681568142545	0.211892411080367	0.158356589266381	0.0343061220373204	-0.0654794137675916	4	0.0847689271541193	0.124761883643307	0.0623809418216534	0.223041151597987	0.461817398137476	0.0310714459330059	0.102716920795594	0.0847890881817281	-0.148893835687928	4	0.0174209048056002	0.114979436790042	0.0574897183950208	0.772101363616729
H0YDU8	-0.063455707975162	-0.0556410604968245	0.0450651715315313	0.0247628440289075	4	-0.0123171882278869	0.0552562820381595	0.0276281410190797	0.671363288292828	0.801554528550272	-0.0126401807787703	-0.0148988763793384	-0.0269967323780173	0.0233829274379508	4	-0.00778821552454383	0.0217156651438432	0.0108578325719216	0.500153871811641	0.719983406898376	-0.014026312269579	-0.0528354074081543	0.00682933839011635	-0.0118863291601319	4	-0.0179796776119372	0.0250543886209071	0.0125271943104536	0.201223688228798	0.391189202260873	-0.0395961743457949	-0.0670275657182469	0.0210616155278296	-0.0379678501990205	4	-0.0308824936838082	0.0371069949461107	0.0185534974730554	0.147065974046615	0.360353878972886	-0.0468172215197061	-0.0699116933758984	-0.0211129871531984	0.0055918482443539	4	-0.0330625134511123	0.0325781363903767	0.0162890681951884	0.088696172661412
H0YEF3	NA	NA	NA	NA	0	NA	NA	NA	NA	NA	NA	NA	NA	NA	0	NA	NA	NA	NA	NA	NA	NA	NA	NA	0	NA	NA	NA	NA	NA	NA	NA	NA	NA	0	NA	NA	NA	NA	NA	NA	NA	NA	NA	0	NA	NA	NA	NA
H0YEW4	0.354751389885569	-0.447233450154928	NA	0.50382901446895	3	0.137115651399864	0.511521200835093	0.295326902998341	0.602853997000352	0.754628419433567	-0.09089919469927	-0.676754976640647	NA	0.579714422759004	3	-0.062646582860304	0.628710979277221	0.362986453128177	0.844708499591052	0.922666531716399	-0.0120141849686745	-0.209936368492883	NA	0.460910547563211	3	0.0796533313672176	0.344689855317626	0.199006780754565	0.652554598328566	0.792556267877563	-0.153088438646428	0	NA	0.269784475923974	3	0.0388986790925155	0.214103259890347	0.123612574732068	0.722260552026379	0.861299269734021	0.114671647550947	-0.751138912491056	NA	0.320246305257367	3	-0.105406986560914	0.568588185857625	0.328274542162941	0.716918495630106
H0YFD6	-0.0190188541259431	-0.00995824516979849	0.0734097972254929	0.053698732598506	4	0.0245328576320643	0.0459201889373255	0.0229600944686628	0.326386731919581	0.512022361490864	0.0136641435731381	-0.0588250693460292	0.0600888843856941	0.0600247710722175	4	0.0187381824212551	0.0561434675640095	0.0280717337820048	0.529268569110734	0.745216061677572	-0.00699611020205004	-0.0233684984674858	0.0734014733589817	0.0307435234311079	4	0.0184450970301384	0.0430777838528075	0.0215388919264037	0.424672175156573	0.619287981427073	0.00243904545141732	-0.0238467419543678	0.0567318850985553	0.0201561962431293	4	0.0138700962096835	0.0338126051590034	0.0169063025795017	0.443347421457598	0.667449828220279	0.0433150416877531	-0.00684067209038051	0.0514690149817016	0.0454972594605238	4	0.0333601610098995	0.0270212655898959	0.0135106327949479	0.0485117341365681
H0YG20	0.102860788955197	NA	-0.0541638392398485	0.0294317640937543	3	0.0260429046030343	0.0785671479782356	0.0453607640346955	0.52309683412652	0.692044520597142	0.0483755939028579	NA	0.0736072085603883	0.00313970753056726	3	0.0417075033312711	0.03570384782135	0.0206136261507619	0.0602433900584059	0.237777956364845	0.0992032936298753	NA	0.0304806064547617	-0.274622380109006	3	-0.0483128266747895	0.19897917583214	0.114880680729816	0.636561659449334	0.780659592906831	0.218201583121852	NA	-0.131152691597546	0.105353000146229	3	0.0641339638901781	0.178287293514113	0.102934216903463	0.489954862403307	0.70282457491401	0.133882251516781	NA	-0.196142522178623	-0.23528941535089	3	-0.0991832286709103	0.202787470896502	0.117079400910379	0.357745893059717
H0YHG0	0.262134408898251	0.107535317848642	-0.0804657105523276	0.177700931052302	4	0.116726236811717	0.145865905250781	0.0729329526253907	0.160614639185422	0.335456114621931	0.207442079870476	-0.00164785288148225	-0.0643448911503214	0.127755547198372	4	0.0673012207592613	0.12298896903715	0.061494484518575	0.315745549030539	0.572175190858379	0.295566659818381	0.0940059809211168	0.11508222904214	0.25685583090467	4	0.190377675171577	0.100732277748552	0.0503661388742759	0.0091817075566268	0.0531394459320568	0.0853073126245066	0.215880290387357	0.196256934224863	0.273664429067257	4	0.192777241575996	0.0788212785449787	0.0394106392724893	0.00273424631230576	0.0287047324902103	0.302958858320773	0.196223488311646	0.0930002375009683	0.295352126106522	4	0.221883677559977	0.0987255189923665	0.0493627594961832	0.0041260220524015
H0YHS6	-0.31385328813103	NA	-0.115231128713004	-0.071936326475028	3	-0.167006914439687	0.129001949888091	0.0744793104938758	0.0438152752798061	0.14885469740626	-0.149336021435972	NA	-0.0759063328589638	-0.0446888175600479	3	-0.0899770572849945	0.0537238148698254	0.0310174589769873	0.0179035083290461	0.112754803497305	-0.315213825058506	NA	0.0421624115023971	-0.177714349547875	3	-0.150255254367995	0.180263543307242	0.104075205253512	0.14501653993648	0.314705671376869	-0.10766650977434	NA	0.0455625773804438	0.0201561962431293	3	-0.0139825787169222	0.0821211315947474	0.0474126574323841	0.73884409152662	0.87007921628481	-0.156897144799917	NA	-0.0533733508757964	-0.0556873748840926	3	-0.0886526235199352	0.0591128132499894	0.0341287986424375	0.0267101659059111
H0YIC4	-0.110761422753519	-0.046644269392989	-0.0757892233428544	-0.0844924983421211	4	-0.0794218534578708	0.0264288104276488	0.0132144052138244	0.000955935121501807	0.0107438590143241	-0.130427558885907	-0.118362196323393	-0.0286006180806071	-0.085794020889721	4	-0.0907960985449071	0.0455479270166673	0.0227739635083337	0.0072266117677968	0.0635960405450718	-0.234406606305122	-0.343614803724852	-0.0827642003984333	-0.172702086112886	4	-0.208371924135324	0.109572014009448	0.0547860070047241	0.00893243698907395	0.0522297040966548	-0.0725879999566061	0.0288188367259991	-0.0470485728044314	-0.132360220473975	4	-0.0557944891272534	0.0667838283491557	0.0333919141745779	0.145776695831691	0.357987775385217	0.035164200566889	-0.00136554202422942	0.0345158817005044	-0.0851011366513885	4	-0.00419664910205615	0.0565729257999699	0.0282864628999849	0.886917319950994
H0YIV4	0.112879544780188	0.098294645482225	0.23017657678852	0.084311092207437	4	0.131415464814592	0.0668659060154712	0.0334329530077356	0.00770639202378345	0.0455600664160617	0.0305643177863973	0.0517614276897416	0.236037673455777	0.146334343358358	4	0.116174440572568	0.0944368284187353	0.0472184142093677	0.0490952808387592	0.21033586771161	0.0973405496126857	0.152775561837408	0.339955639882343	0.121950532277792	4	0.178005570902557	0.11032284625121	0.0551614231256048	0.01797831146911	0.0817269707836384	0.0420991325361961	-0.0349872995595682	0.165632540552187	-0.0156986863579879	4	0.0392614217927066	0.0903902619555338	0.0451951309777669	0.41839445288817	0.648935602695364	-0.0126184044142007	0.064070992896111	0.305769179458356	0.088286532417955	4	0.111377075089555	0.136545728300887	0.0682728641504435	0.153937069864051
H0YJ34	-0.221268214125436	0.0654780712405101	-0.00295634333141221	-0.064454745105576	4	-0.0558003078304786	0.122413856939279	0.0612069284696393	0.397093164963064	0.576013741690663	-0.189216890093513	0.268240223993374	0.0280446311799447	-0.0675632838126346	4	0.00987617031679287	0.193835835147285	0.0969179175736425	0.922154339494049	0.959452596285755	-0.23792967286882	0.0991676860368956	0.111918422859969	-0.134842542286867	4	-0.0404215265647056	0.173798163139449	0.0868990815697243	0.658223741020417	0.796469615081979	-0.289642240700691	-0.0183085584129378	0.0248581836159087	-0.0283818013698225	4	-0.0778686042168857	0.143058506400017	0.0715292532000087	0.318101147033667	0.562350741217997	-0.204358498506186	0.0456757249409242	0.00348898607987985	-0.0527787145422069	4	-0.0519931255068973	0.109290580706164	0.0546452903530818	0.378105606271001
H0YJ75	0.0240900873068186	-0.0790366279088495	0.069193442424423	0.0491078137176238	4	0.015838678885004	0.0658862041832476	0.0329431020916238	0.647695542799174	0.783436236772753	0.257111141269604	0.0565201842008774	0.330398874056717	0.218345588273746	4	0.215593946950236	0.115781233708647	0.0578906168543236	0.00980404840211583	0.077585440627215	0.026671602563345	-0.192172089017044	0.192003166901377	0.403896941673643	4	0.10759990553033	0.252539424706591	0.126269712353296	0.426833226654002	0.621579599246485	0.132835682707092	-0.0405900057889442	0.0622842782543427	-0.0573331750659516	4	0.0242991950266348	0.0896241930419154	0.0448120965209577	0.607184753012213	0.781887479389463	0.309732086916199	-0.028951373696129	0.0598714559773987	0.181395936809436	4	0.130512026501726	0.147340499738796	0.0736702498693979	0.126848037770077
H0YKT5	0.151058081921416	-0.273742297703177	-0.154137622433027	-0.104812482721717	4	-0.0954085802341261	0.17896579200136	0.0894828960006798	0.327335819736828	0.513244908228439	0.432662761357743	0.216734786474522	-0.227909426304014	0.046392905484451	4	0.116970256753176	0.279008887045892	0.139504443522946	0.433892863517294	0.671471704841675	0.125946249328512	0.0877874581859595	-0.0451965527963989	0.0861566437497145	4	0.0636734496169468	0.0748722432705133	0.0374361216352567	0.139874271883655	0.306650159544029	0.320462685882864	0.18420624010956	-0.137503523749935	-0.0299750594454899	4	0.0842975856992498	0.206566908734256	0.103283454367128	0.445584731410566	0.668819584436018	0.324856576474664	-0.0359310440145747	-0.125848481433714	0.0373310393121022	4	0.0501020225846194	0.194947370085562	0.0974736850427809	0.625623198872066
H0YMJ0	NA	NA	NA	NA	0	NA	NA	NA	NA	NA	NA	NA	NA	NA	0	NA	NA	NA	NA	NA	NA	NA	NA	NA	0	NA	NA	NA	NA	NA	NA	NA	NA	NA	0	NA	NA	NA	NA	NA	NA	NA	NA	NA	0	NA	NA	NA	NA
H3BLV9	0.030711003199362	-0.0948471427563116	0.110812531626162	0.132846695268042	4	0.0448807718343136	0.102971959118023	0.0514859795590117	0.41687982117937	0.596746244845804	0.0472688082399147	0.132103536007345	0.0234082210592259	0.181404009885609	4	0.0960461437980236	0.073578975982543	0.0367894879912715	0.0400830299024875	0.186130567427373	0.0227512331920021	0.0055085788226506	0.130798016703692	0.0132560967022669	4	0.0430784813551529	0.058903271279662	0.029451635639831	0.193876000422543	0.38156715447744	0.0539052134853727	-0.0594244122004331	0.134343951890168	0.210297096304433	4	0.0847804623698851	0.115411281556019	0.0577056407780096	0.192171072257002	0.425705931169176	0.0774513812153031	-0.0457596613826829	0.0995356735509145	0.111809255271379	4	0.0607591621637283	0.0724214972418126	0.0362107486209063	0.144369662499331
H3BMM9	-0.123936811501252	-0.288817618165275	0.00883285437219538	-0.0179516423317247	4	-0.105468304406514	0.135008614106638	0.0675043070533192	0.169222525171507	0.344264810423818	0	-0.56289876505517	-0.215069080530589	-0.129823342973985	4	-0.226947797139936	0.240792178011919	0.12039608900596	0.108399508555088	0.334500239258797	-0.200786638812708	-0.0923001621046516	-0.22553337170126	-0.159420565007533	4	-0.169510184406538	0.0582523306496696	0.0291261653248348	0.00113114213171822	0.0136232775465506	-0.144968182457042	-0.300260177589361	-0.00579784453811277	0	4	-0.112756551146129	0.141832534897913	0.0709162674489563	0.162938470361838	0.386021156664449	-0.133739423812664	-0.396503483865368	-0.345702063503628	-0.142695351218822	4	-0.254660080600121	0.136095676595802	0.0680478382979011	0.00959564845569746
H3BN98	-0.0258725251670055	-0.0842875710700256	-0.272218859538408	0.168206011684699	4	-0.0535432360226849	0.181385996846084	0.0906929984230419	0.576481200669585	0.735317582119897	0.256153494343708	0.116996643617137	-0.211421303515445	0.178629595490404	4	0.085089607483951	0.205709635198347	0.102854817599174	0.439733979509203	0.675122305767558	0.0441826137235131	0.0658090890904648	-0.251783270859085	0.074962057681222	4	-0.0167073775909712	0.157247701917273	0.0786238509586366	0.838754240752951	0.904908661597491	0.0921936982097465	-0.0219983175619992	-0.270770054613399	0.0566435793576927	4	-0.0359827736519898	0.163635246329737	0.0818176231648687	0.675486283775457	0.830754693186821	0.0412816445352248	-0.109121722380112	-0.286985947844448	0.182630592461076	4	-0.0430488583070651	0.20158850432455	0.100794252162275	0.684210526684458
H3BNC9	-0.035522695200725	0.00247885806842421	0.00147590298384849	0.0235932492823289	4	-0.00199367121653085	0.0245691365557437	0.0122845682778719	0.876404522629562	0.932884235139474	-0.087248340686313	-0.206830984185707	0.0280446311799447	0.078002512001273	4	-0.0470080454227006	0.127047493547912	0.063523746773956	0.487229840350117	0.707103124041481	0.00696234738786972	-0.0551272189161439	0.0119302100829818	0.0263914988914009	4	-0.00246079063847287	0.0360652358496431	0.0180326179248215	0.895918704766768	0.939750952293525	-0.0333371838741124	-0.0785079581897067	0.0380680408335195	0.0626360907393851	4	-0.00278525262272864	0.0648492929673574	0.0324246464836787	0.934341270526751	0.967576102231252	-0.0232187095679472	0.064070992896111	0.00870669535089913	0.0816837975937081	4	0.0328106940681927	0.0486006973784371	0.0243003486892186	0.225651505775289
H3BNT2	NA	0.125840972367887	-0.128083730785067	-0.284361903052429	3	-0.0955348871565365	0.207029394451464	0.119528476616718	0.383295997736831	0.566142314177559	NA	0.100194288052601	0.03420342405872	-0.00157241981875358	3	0.0442750974308558	0.0516255233496925	0.0298060098030003	0.1359908294324	0.375091493954513	NA	0.0668633054624664	0.0271255001963813	-0.101121924442866	3	-0.00237770626133937	0.0877928741986046	0.0506872395514953	0.957459609825619	0.975202291274544	NA	0.0882117652381037	-0.0570464994483389	-0.18997094364407	3	-0.0529352259514352	0.139136917486269	0.0803307367649123	0.466599931346929	0.684724074010566	NA	0.174618666312545	-0.112569143383697	-0.124258102962146	3	-0.0207361933444324	0.169283191243858	0.0977356960339205	0.809911933271512
H3BP35	0.0477845165583034	0.0796338188994433	-0.0480442328599503	-0.00715387436548881	4	0.0180550570580769	0.0568049030256978	0.0284024515128489	0.548444062019166	0.713402065182418	0.0714240840097041	0.0228744662525867	-0.00630687361083238	-0.145382817179521	4	-0.0143477851320156	0.0930540083607097	0.0465270041803548	0.768222501222396	0.884362765116261	-0.00199542914368345	0.00880365838423153	-0.0701326434247677	-0.0588936890535684	4	-0.030554525809447	0.0397249889143558	0.0198624944571779	0.174894070580939	0.358327494109535	0.241101985231931	-0.0183085584129378	0.0455625773804438	-0.070389327891398	4	0.0494916690770097	0.136257446647118	0.0681287233235591	0.494918858525705	0.704065745563862	-0.10417962608555	-0.0331351225176235	-0.0882271830117352	-0.15200309344505	4	-0.0943862562649897	0.0490076374583681	0.024503818729184	0.00844132030571997
H3BP71	NA	NA	NA	NA	0	NA	NA	NA	NA	NA	NA	NA	NA	NA	0	NA	NA	NA	NA	NA	NA	NA	NA	NA	0	NA	NA	NA	NA	NA	NA	NA	NA	NA	0	NA	NA	NA	NA	NA	NA	NA	NA	NA	0	NA	NA	NA	NA
H3BPE1	0.114127011386999	-0.0364304565309897	-0.0404310487500751	-0.511348513434548	4	-0.118520751832153	0.271585131113924	0.135792565556962	0.416326018341473	0.596746244845804	0.0746868710187051	0.0707029913432019	0.0929127313571793	-0.305131942875212	4	-0.0167073372890314	0.192525997743453	0.0962629988717267	0.867919260093848	0.935706106727425	-0.0120141849686745	0.00660777509745369	-0.0434317880003335	-0.336801371368893	4	-0.0964098923101117	0.161585908993826	0.0807929544969131	0.277793439217695	0.47664227851849	0.203437031326462	-0.00546821263951319	-0.0135647275818029	-0.324272035355662	4	-0.0349669860626288	0.217456602072881	0.108728301036441	0.758664584144613	0.879819268061874	0.0873396655797512	0.096347395919867	-0.270037793571556	-0.620411336725446	4	-0.176690517199346	0.34149842318127	0.170749211590635	0.34065820486895
H3BPJ9	0.0293892486031166	0.163985987094916	0.0364520412268232	0.00118887113517169	4	0.0577540370150069	0.0724411978895174	0.0362205989447587	0.161932437487613	0.336445553534831	0.191500536001455	0.353207261375221	-0.0561430780375339	0.00783649423196628	4	0.124100303392777	0.185326504150276	0.0926632520751381	0.22898627639175	0.48851482959228	0.0785796215040241	0.226329265565372	0.0734014733589817	0.00295634333141221	4	0.0953166759399474	0.0939062205523412	0.0469531102761706	0.0886589186247732	0.2289798834231	0.210838194708366	0.181000249810469	0.0511580402739633	-0.0605861528610393	4	0.0956025829829396	0.125089629586774	0.0625448147933871	0.177241696183461	0.404618107893797	0.180818565437688	0.106525180923899	0.0514690149817016	0.00698643031610671	4	0.0864497979148488	0.0749367894772844	0.0374683947386422	0.0604944816299109
H3BQV3	NA	-0.0935229618089296	-0.154137622433027	-0.454830190150151	3	-0.234163591464036	0.193491201615003	0.111712197338246	0.0541342618110595	0.168362009727194	NA	-0.149078216536708	0.174637128791633	-0.138446769969144	3	-0.0376292859047398	0.183904948329481	0.10617757142333	0.689469895098439	0.83907709053244	NA	-0.295405710682233	0.135479562318154	-0.271046925885178	3	-0.143657691416419	0.242046570758722	0.139745652783974	0.273860205276273	0.473983701248133	NA	-0.336556306812352	0.153545258253455	-0.263034405833794	3	-0.148681818130897	0.264305262444299	0.152596714420451	0.296733106909581	0.539725741388486	NA	-0.140372656364552	0.277228287416548	0.494403181996164	3	0.210419604349387	0.322618414448887	0.186263828427595	0.234839229768123
H3BQZ7	0.173968054179594	0.0148096599791437	0.0593070941073101	0.00948364986689298	4	0.0643921145332353	0.076389578856757	0.0381947894283785	0.142793948019465	0.307454490643051	0.0725124997843681	-0.0316356654886736	-0.102685663974564	-0.082462160191973	4	-0.0360677474677107	0.0783149661638497	0.0391574830819248	0.392530294753983	0.635375006145431	0.0842335609712088	-0.0233684984674858	0.0487955038348441	-0.086908065223165	4	0.00568812527885054	0.0762582748145927	0.0381291374072964	0.886299123636686	0.935830335575865	0.119415166944771	0.00725885828649331	-0.0135647275818029	0.061140294813904	4	0.0435623981158413	0.0595653156514154	0.0297826578257077	0.19387833928006	0.428118494991688	0.143392470799254	-0.0373310393121022	0.0946368741380753	-0.0469789276723849	4	0.0384298444882106	0.0952378653343958	0.0476189326671979	0.450448084924102
H3BR70	-0.16268921479738	-0.0948471427563116	-0.120037446453938	-0.150286149448606	4	-0.131964988364059	0.0305485610789888	0.0152742805394944	0.000132461737337126	0.00306777810267285	-0.110528001448203	0.219566377257685	-0.0253946277815158	0.103093492964104	4	0.0466843102480174	0.144892246450672	0.0724461232253358	0.543150579060154	0.755664425740113	-0.143498110106912	0.0262514301164586	0.00682933839011635	0.193569586170694	4	0.0207880611425892	0.137922799416054	0.0689613997080269	0.773249632191364	0.865591347830569	-0.149022597418356	0.209600867891076	0.0057746376266351	-0.174029399775049	4	-0.0269191229189236	0.176598678810547	0.0882993394052734	0.770769394475795	0.885128515304984	-0.258435171261979	0.228035937831582	0.0121747139461023	-0.106053507584555	4	-0.0310695067672126	0.205201884182028	0.102600942091014	0.772251993976531
H3BST1	0.155911560143624	0.449359815669739	0.167133058434808	-0.269949245314983	4	0.125613797233297	0.296604904753552	0.148302452376776	0.429473135608436	0.607817082839093	0.382642023353463	-0.340158831964449	-0.0205989611798667	0.14206811538733	4	0.0409880863991194	0.303320799761683	0.151660399880842	0.796014177015224	0.899234251538499	0.0719552311927719	0.37672742374723	0.19050426282796	0.277755911540559	4	0.22923570732713	0.129544444877042	0.064772222438521	0.0122321367871751	0.0646464152231299	-0.0687425200053113	-0.230297619421794	0.306415095516038	0.282677278804869	4	0.0725130587234503	0.264906654967954	0.132453327483977	0.603813719043689	0.779388929406094	0.292739016002894	0.211628181309969	0.0698902118023897	0.102707048164126	4	0.169241114319845	0.102218359339843	0.0511091796699214	0.0161772407770075
H3BU93	-0.0962618530584035	0.148401166888432	NA	-0.183667903432956	3	-0.0438428632009758	0.172128672042989	0.0993785351392722	0.620536085077082	0.767094171374461	-0.172358239351826	-0.00825815100230884	NA	0.10601688817087	3	-0.024866500727755	0.139928752821825	0.080787903109049	0.728014739733002	0.86035518303865	-0.0799424752738251	0.12672619368033	NA	0.278975949702815	3	0.10858655603644	0.180145479508415	0.104007041087478	0.267337204102673	0.465371168905396	-0.0893712187884404	0.145255976740755	NA	-0.0125452533191136	3	0.0144465015444002	0.119619799128041	0.0690625232269832	0.812520985843656	0.911141886894099	-0.136038539902252	0.0653760088520242	NA	0.120854394874386	3	0.0167306212747193	0.13517867910269	0.0780454467686364	0.807987741564627
H3BUD0	NA	-0.0024831246076519	-0.212825931026303	0.18504290639347	3	-0.0100887164134949	0.199043429224575	0.114917777443234	0.920510702619094	0.956255619937292	NA	0.121545344308768	-0.0594182100703948	0.0645402521947105	3	0.0422224621443614	0.0925230501979571	0.0534182079380358	0.388178260899259	0.631233395749575	NA	0.029499525389152	-0.0103050083917385	0.190979468704986	3	0.0700579952341333	0.106595507818811	0.0615429451335954	0.23176098049247	0.424879348733007	NA	0.239187663879426	0.0399453280741899	0.170618771612397	3	0.149917254522004	0.101221498218829	0.0584402592444184	0.0279064920549183	0.124585127203827	NA	0.196223488311646	0	0.248959220622071	3	0.148394236311239	0.13119032507535	0.075742769497328	0.0662419601076565
H7BXH2	0.0293892486031166	-0.0237640446948291	0.0564699348037807	0.180852068178874	4	0.0607368017227355	0.0867351246055203	0.0433675623027601	0.210895662323892	0.394278943252791	0.0505866212182111	0.0628408735702314	0.07808531367954	0.173064708972879	4	0.0911443793602155	0.0557599013204791	0.0278799506602395	0.0170518664524265	0.109211424334079	0.0237323247231055	-0.0654856641874756	0.118239112229323	0.134136672651536	4	0.0526556113541222	0.0926179903930406	0.0463089951965203	0.298879918548264	0.496709177444422	0.0899018867017568	0.00363399446773927	0.0879165902840811	0.102447268970818	4	0.0709749351060987	0.0453525422360769	0.0226762711180385	0.0203266581974589	0.101704463071588	0.0249104613063319	-0.0485801804450616	0.0632187777595097	0.158989523761157	4	0.0496346455954842	0.0864107542848254	0.0432053771424127	0.294362969849271
H7BXI1	0.012095325032015	-0.0389771386413362	-0.0603095143091983	-0.0694381526198316	4	-0.0391573701345878	0.036474695504025	0.0182373477520125	0.075407766587425	0.205923828720674	0.0383838222456964	-0.102361717629678	-0.0366469024117367	-0.0237681659329498	4	-0.031098240932167	0.0577083409863147	0.0288541704931573	0.322547372136718	0.576958997614969	0.0344805257741092	-0.0643310462459837	-0.0416691793010737	-0.0650722639826927	4	-0.0341479909389102	0.0470239976734029	0.0235119988367014	0.196610749349271	0.385443771259951	0.0325842090715912	-0.0109572301964921	-0.0833700866164565	0.0201561962431293	4	-0.010396727874557	0.0519816229124509	0.0259908114562255	0.702997399199775	0.847779494978946	0.0574691359976134	-0.0613412025815449	-0.0919454712578454	-0.0880757666554997	4	-0.0459733261243191	0.070291223310623	0.0351456116553115	0.238722141170689
H7BXY3	-0.602614519083193	0.00371669172727793	-0.202594008415347	-0.145016024717318	4	-0.236626965122145	0.259012721429024	0.129506360714512	0.117451763147686	0.272491696082467	-0.264178947774735	0.170656776776738	-0.157783339913372	-0.324680955279996	4	-0.143996616547841	0.220822292559754	0.110411146279877	0.239964309911407	0.499678733560971	-0.356742149229175	0.0742213289066647	-0.0955073309286236	-0.225354835192309	4	-0.150845746610861	0.184085543180911	0.0920427715904553	0.152353570978152	0.325722303014919	-0.116901900513244	0.182604135513059	-0.218219532559689	-0.0524674198941356	4	-0.0512461793635025	0.170174651063323	0.0850873255316617	0.569035639682571	0.753692496176898	-0.51547083647433	0.0575281470293391	0.0930002375009683	-0.159805681641243	4	-0.131187033396316	0.279503381071338	0.139751690535669	0.384110633478077
H7BY55	0.242875531861182	0.109836267364916	NA	0.0259314913515298	3	0.126214430192542	0.10939544022202	0.0631594868603009	0.0625052672395345	0.185794909405224	0.231028900188092	0.0893990850531069	NA	-0.0333861684945468	3	0.0956806055822175	0.132319406217416	0.0763946447986363	0.194660638792822	0.453009323380063	0.166486710653452	0.262666418319775	NA	0.117865503477053	3	0.182339544150093	0.0736906403977229	0.0425453110703812	0.00369940808760229	0.0297201299931752	0.21505044599528	0.350390226199036	NA	-0.0236125572219505	3	0.180609371657455	0.189365153084772	0.109330022108628	0.105319387636291	0.2897001900132	0.318154148434172	0.302968492848395	NA	-0.0254350473762706	3	0.198562531302099	0.194136131295083	0.112084547662649	0.0877945887848192
H7BZJ3	-0.00812025618938593	-0.0364304565309897	-0.0133515146937907	-0.0997055922886282	4	-0.0394019549256986	0.0420417593749164	0.0210208796874582	0.110002722521285	0.261029902138286	0.0339207249789709	-0.00164785288148225	-0.0942636024565909	-0.0741660186368817	4	-0.034039187248996	0.0602906598528319	0.030145329926416	0.301939696614606	0.563205766594098	0.000996680551480611	0.0131854234561115	0.116661534115988	0.0565835283663675	4	0.0468567916224868	0.0522947489521632	0.0261473744760816	0.123306383734711	0.281324677758514	0.0921936982097465	0.206450877467426	0.060435853861974	-0.135787051160913	4	0.0558233445945584	0.142299303447313	0.0711496517236564	0.462536896632357	0.682609943298254	0.0674948541828797	0.082234659593711	0.13336926862679	-0.00140135517661238	4	0.070424356806692	0.0555849501918534	0.0277924750959267	0.0444429860655232
H7BZV4	NA	NA	NA	NA	0	NA	NA	NA	NA	NA	NA	NA	NA	NA	0	NA	NA	NA	NA	NA	NA	NA	NA	NA	0	NA	NA	NA	NA	NA	NA	NA	NA	NA	0	NA	NA	NA	NA	NA	NA	NA	NA	NA	0	NA	NA	NA	NA
H7C0E5	0.147407227908459	0.0843217029296208	0.131180329320124	0.0954861677641144	4	0.11459885698058	0.029627326206275	0.0148136631031375	0.000244987202289779	0.00462354521192068	0.0193195606187747	-0.121942086599194	0.0449184497443407	0.139216938489206	4	0.020378215563282	0.107983107194653	0.0539915535973266	0.718841774022423	0.853256099700316	0.0412788320503753	-0.116029233895348	0.0701448240282776	0.217946516305256	4	0.0533352346221401	0.136880868388713	0.0684404341943567	0.46542355641301	0.655276519856561	0.0853073126245066	-0.295786701010054	0.289155895170433	0.0745469533650539	4	0.038305865037485	0.243629591021816	0.121814795510908	0.76381925591719	0.882131438942958	0.118534287183345	-0.254596772827665	0.177280768290217	0.198585698106952	4	0.0599509951882123	0.212413242661792	0.106206621330896	0.592890017379913
H7C1I0	-0.23073889391844	-0.0517784208644254	0.0479248256707719	0.169264093903662	4	-0.0163320988021078	0.169116936496016	0.0845584682480082	0.853217191505571	0.919296336168424	0.11221728647699	0.265502661424543	-0.220558098087568	0.0264722113611911	4	0.0459085152937891	0.20330655679557	0.101653278397785	0.667409159564963	0.825925741532205	-0.0958371829567278	0.0658090890904648	0.0454827697940084	-0.227085723271425	4	-0.05290776183592	0.136571452429236	0.0682857262146182	0.467883111532669	0.657559575157257	-0.0932721541283439	-0.159501841311934	-0.0977458145122003	0.0995356735509143	4	-0.062746034100391	0.112329674767648	0.0561648373838241	0.306647193837679	0.55145417428394	-0.392186560150806	-0.316138917829644	-0.0661164814059867	0.0843285188492718	4	-0.172528360134291	0.220735634739636	0.110367817369818	0.16903283350032
H7C2N1	0.0555969636686015	0.143917262608022	0.176309704809784	-0.0349104694915607	4	0.0852283653987117	0.0949588624297266	0.0474794312148633	0.122789775552034	0.279505690646837	0.11855417092968	0.0769619818148842	0.07808531367954	-0.0692111366941169	4	0.0510975824324968	0.0825063311163432	0.0412531655581716	0.261739431375355	0.521237352468839	0.256872947110557	0.274578226562938	0.3878282546493	-0.0635251377852142	4	0.213938572634395	0.193859279075738	0.0969296395378689	0.0694148755956959	0.197071132914737	0.159307894068283	0.133694535032112	0.0915414541028352	-0.0753160089713246	4	0.0773069685579765	0.105514775088702	0.0527573875443512	0.193181064940688	0.427202896353841	0.164096864563789	0.124165340059629	0.230354883995636	-0.141149882360919	4	0.0943668015645339	0.163004193762874	0.0815020968814369	0.290930331644377
H7C488	-0.0424554093626097	-0.430418632294263	NA	-0.0239855074252823	3	-0.165619849694052	0.229508345750888	0.132506705200541	0.195425116688335	0.375092144602436	0.138439292250041	-0.222117962086902	NA	0.0479139336073013	3	-0.0119215787431864	0.187578249851716	0.108298353046007	0.900453324737305	0.948372211120789	-0.075733296384624	-0.322756198827188	NA	0.00590664096672198	3	-0.13086095141503	0.171126004240188	0.0987996446134178	0.174249382170948	0.35760752362714	-0.105038649228301	-0.0939586551653823	NA	-0.123828586852858	3	-0.107608630415514	0.0150998942787886	0.0087179280265935	2.58663726805969e-05	0.00162777786698908	0.114671647550947	-0.0443514669898747	NA	-0.0183246582130808	3	0.0173318407826637	0.0852972870614355	0.0492464116460646	0.691478253829968
H7C4C5	NA	NA	NA	NA	0	NA	NA	NA	NA	NA	NA	NA	NA	NA	0	NA	NA	NA	NA	NA	NA	NA	NA	NA	0	NA	NA	NA	NA	NA	NA	NA	NA	NA	0	NA	NA	NA	NA	NA	NA	NA	NA	NA	0	NA	NA	NA	NA
H7C4T5	0.221042215303511	-0.0389771386413362	-0.0480442328599503	0.389539574228009	4	0.130890104507558	0.212837440825771	0.106418720412886	0.264749199358741	0.451899610478182	0.0865876849960908	-0.102361717629678	0.182976429704363	0.380444559454303	4	0.13691173913127	0.201009525335674	0.100504762667837	0.222040646261675	0.48047879287691	0.22224998217546	-0.125631233006648	-0.22553337170126	0.190979468704986	4	0.0155162115431349	0.224761880827196	0.112380940413598	0.894703772983083	0.939608640903696	0.091048247541484	0.0306010420680086	0.148333831608114	0.294183104404458	4	0.141041556405516	0.112844951355758	0.0564224756778791	0.0465445603274867	0.175441653204479	0.0952017833527216	-0.0471692316373544	-0.263733216717347	0.13495459191924	4	-0.0201865182706851	0.180209401685367	0.0901047008426836	0.830164625957395
H7C5I5	0.126542707986858	0.138292713414144	0.191906559860802	0.073048778644359	4	0.132447689976541	0.0487600279827872	0.0243800139913936	0.00161349398211741	0.0154844200252093	0.203473177667531	-0.0468666050379743	0.288505093349912	0.284354129429382	4	0.182366448852213	0.157755280780523	0.0788776403902613	0.0601025190019597	0.237777956364845	-0.0455785725211016	0.0804984745928253	0.34938945704333	0.313915574835978	4	0.174556233487758	0.189115376516328	0.0945576882581642	0.114418122478639	0.267713610102883	0.080698059371917	0.0605664634672961	0.17591307128191	0.0789882961468286	4	0.0990414725669879	0.0520518322008377	0.0260259161004189	0.00891037185404598	0.0609412989022194	0.0932402670194355	0.256879262404869	0.112518393701778	0.118275850772609	4	0.145228443474673	0.0751998791409334	0.0375999395704667	0.00833841802734265
H9KV45	0.0787836330525103	-0.0816597105239873	0.222603357083719	0.209935458499389	4	0.107415684527908	0.14183065412633	0.0709153270631652	0.180622937907481	0.357620661117024	-0.0382577149580404	-0.0882865324179551	0.402396059877896	0.279183173926224	4	0.138758746607031	0.239518989594532	0.119759494797266	0.290628141019657	0.551864868280416	0.0518975788515186	-0.0970148559767036	0.260750756697075	0.211571362136028	4	0.106801210426979	0.162514250831888	0.0812571254159442	0.236732081413688	0.42981446373188	-0.0221389772692486	-0.044337267742152	0.315742897671157	0.103900866112316	4	0.0882918796930182	0.165088936591897	0.0825444682959485	0.32591761279681	0.569837445624498	-0.0210924084595593	-0.0164724344144379	0.200266305601664	0.225191054689121	4	0.096973129354197	0.134063024724092	0.067031512362046	0.198132200651951
H9KVA9	NA	NA	NA	NA	0	NA	NA	NA	NA	NA	NA	NA	NA	NA	0	NA	NA	NA	NA	NA	NA	NA	NA	NA	0	NA	NA	NA	NA	NA	NA	NA	NA	NA	0	NA	NA	NA	NA	NA	NA	NA	NA	NA	0	NA	NA	NA	NA
I3L0A0	0.101603538295335	-0.00124102806868964	-0.0358823480584434	0.243476198702541	4	0.0769890902176856	0.125410979492012	0.062705489746006	0.265504575757881	0.452180469023141	0.0951815751340834	-0.0165638448744485	0.0899594139678318	0.253046679378749	4	0.105405955901554	0.111081875434287	0.0555409377171437	0.106493203136326	0.331225442594364	0.123202612924652	0.0316608666786192	-0.0120296888611995	0.231873474347333	4	0.0936768162723511	0.107996808907498	0.0539984044537492	0.133465115464575	0.297540592956793	0.00851867956812349	-0.012791553445372	0.0436925900273976	0.129818240486957	4	0.0423094891592765	0.06281623525779	0.031408117628895	0.226599082936049	0.46630975338031	-0.18518618923134	-0.0471692316373544	-0.0975409341513648	0.0670505274174361	4	-0.0657114569006559	0.105288311927036	0.0526441559635179	0.258450719514147
I3L2A9	NA	0.140545165145523	-0.189063357855885	0.0707857271357901	3	0.00742251147514244	0.173699791113679	0.100285621157664	0.932942393335886	0.963742884509933	NA	0.382559875761669	0.152160412570759	0.0109592119898665	3	0.181893166774098	0.187576093448228	0.108297108045873	0.10097099857898	0.321638913281619	NA	-0.126835988851931	-0.284760593305358	-0.115477217419936	3	-0.175691266525742	0.0946273953738033	0.0546331521917785	0.0120786742344373	0.0641062910065061	NA	0.169722844216326	0.0879165902840811	0.244966113072478	3	0.167535182524295	0.078547613265935	0.0453494856632902	0.00692064850352839	0.0525656292114732	NA	0.0886666588382433	-0.00700338773776249	-0.0600613904859031	3	0.00720062687152589	0.0753745559668983	0.0435175201775373	0.851015108701387
I3L2C7	NA	NA	NA	NA	0	NA	NA	NA	NA	NA	NA	NA	NA	NA	0	NA	NA	NA	NA	NA	NA	NA	NA	NA	0	NA	NA	NA	NA	NA	NA	NA	NA	NA	0	NA	NA	NA	NA	NA	NA	NA	NA	NA	0	NA	NA	NA	NA
I3L397	-0.0327589107522455	0.0245989768665701	0.069193442424423	0.133931020791381	4	0.0487411323325322	0.0704762720757593	0.0352381360378796	0.215874768051016	0.399870970476851	-0.204955537535663	-0.206830984185707	0.00471212734932085	-0.00314655531686403	4	-0.102555237422228	0.119370049913927	0.0596850249569637	0.136549623351581	0.376030203023878	-0.139099646209395	-0.0346308120305637	-0.0683371297631535	0.0307435234311079	4	-0.0528310161430011	0.0707075365806034	0.0353537682903017	0.185703820467965	0.372764043343067	-0.0610821743570167	0.0288188367259991	0.0455625773804438	0.0566435793576927	4	0.0174857047767797	0.0536128138547063	0.0268064069273532	0.538382224742976	0.73411342598016	0.0493980937395968	0.0230186166027298	-0.0606413513398356	-0.0169067759948854	4	-0.00128285424809862	0.0480508691637818	0.0240254345818909	0.959150096505717
I3L3Q4	NA	-0.0948471427563116	0.145936055766265	-0.24436383512051	3	-0.0644249740368523	0.196920370883141	0.113692029138302	0.528286114758676	0.696536831429043	NA	-0.0726143742356259	0.113418386791821	-0.467310912066883	3	-0.142168966503563	0.29654681016224	0.171211380674494	0.366532475875324	0.613186316862813	NA	0.0055085788226506	0.00853163362111692	-0.323778890575304	3	-0.103246226043845	0.190992871094937	0.110269785539961	0.313958757641409	0.512598894895198	NA	-0.105656246608909	0.20966186263645	-0.172268941910612	3	-0.0227544419610234	0.20401548170641	0.117788393282047	0.826546876305629	0.920658836927666	NA	0.0886666588382433	-0.267933205246633	-0.702366932642239	3	-0.29387782635021	0.396154487840014	0.22871990019511	0.185201544537527
I3L4C2	NA	NA	NA	NA	0	NA	NA	NA	NA	NA	NA	NA	NA	NA	0	NA	NA	NA	NA	NA	NA	NA	NA	NA	0	NA	NA	NA	NA	NA	NA	NA	NA	NA	0	NA	NA	NA	NA	NA	NA	NA	NA	NA	0	NA	NA	NA	NA
I3L4Y1	-0.113678906135813	0.0184884423572422	0.160542388951467	-0.10098062113069	4	-0.00890717398944831	0.127695353219166	0.0638476766095832	0.893614837531149	0.943225437799114	-0.293325293434251	-0.0232430005120753	0.272964242454134	-0.202105407191462	4	-0.0614273646709137	0.249561451079039	0.124780725539519	0.640012007025963	0.813789468045413	-0.197353011549176	-0.0177701404882425	0.132360220473975	-0.128358508716668	4	-0.0527803600700278	0.143893546470878	0.071946773235439	0.490850206855516	0.675086521985544	-0.303132474441352	0.09504110362822	-0.043068721891886	-0.105234720277594	4	-0.0890987032456531	0.165425767759926	0.0827128838799632	0.322781543802301	0.566423789452026	-0.159233493554873	-0.094474946415711	0.21237714306658	-0.217265733515562	4	-0.0646492576048917	0.191373252042237	0.0956866260211186	0.524442902378933
J3KMZ7	NA	NA	NA	NA	0	NA	NA	NA	NA	NA	NA	NA	NA	NA	0	NA	NA	NA	NA	NA	NA	NA	NA	NA	0	NA	NA	NA	NA	NA	NA	NA	NA	NA	0	NA	NA	NA	NA	NA	NA	NA	NA	NA	0	NA	NA	NA	NA
J3KMZ8	NA	NA	NA	NA	0	NA	NA	NA	NA	NA	NA	NA	NA	NA	0	NA	NA	NA	NA	NA	NA	NA	NA	NA	0	NA	NA	NA	NA	NA	NA	NA	NA	NA	0	NA	NA	NA	NA	NA	NA	NA	NA	NA	0	NA	NA	NA	NA
J3KN16	0.0826121051113917	0.00247885806842421	0.0277871800996957	0.0165556985423947	4	0.0323584604554766	0.0350658586480926	0.0175329293240463	0.114489011321471	0.267258904420699	0.117499954557678	0.0309568125504454	0.0600888843856941	0.057006579509303	4	0.0663880577507802	0.0364942500070169	0.0182471250035085	0.0108572356693059	0.0828039473988134	0.0188201816020872	-0.00442205722729871	0.0879661011155219	-0.0029624138558615	4	0.0248504529086122	0.0433988656838097	0.0216994328419048	0.295737891619685	0.494839543154924	-0.0134889596763172	-0.0109572301964921	-0.0272582070444239	0.0263018713124791	4	-0.00635063140118855	0.0229164361377598	0.0114582180688799	0.599446091204232	0.77673070217582	0.045345576915124	-0.0814187935902646	0.0208084622799062	-0.03544883600429	4	-0.0126783975998811	0.0569557907772048	0.0284778953886024	0.671786115410147
J3KN59	-0.0244991837583122	-0.0112078728277361	-0.0404310487500751	0.0954861677641144	4	0.00483701560699776	0.0616022658553088	0.0308011329276544	0.880364407254991	0.934788058704544	-0.00688091149008552	0.0389941316158637	0.291079037013739	0.124875915422185	4	0.112017043140426	0.131272766240232	0.0656363831201162	0.13876348538427	0.380283944841916	-0.23792967286882	-0.0256139386731299	0.184493024794098	0.074962057681222	4	-0.00102213226665739	0.179740007008096	0.0898700035040478	0.991294232527125	0.996237521585604	-0.539902778102505	-0.167652682432798	0.143103511531809	0.09661819016862	4	-0.116958439708719	0.313421449456116	0.156710724728058	0.483671899618655	0.698180013744541	-0.0232187095679472	-0.144892853401934	0.110901928500859	0.0125513168336309	4	-0.0111645794088478	0.105658616002856	0.0528293080014282	0.839622671366134
J3KN67	-0.034140141150606	-0.06729142023575	-0.0511007912932887	-0.0706866988170904	4	-0.0558047628741838	0.0167819198128063	0.00839095990640317	0.000558331841161549	0.00781406090662667	-0.134189477682106	-0.216366346332509	-0.00472756853698467	-0.043068721891886	4	-0.0995880286108716	0.0949164100408868	0.0474582050204434	0.0806518526009462	0.283980275245165	-0.075733296384624	-0.0482626776183302	0.152516416717105	0.022026306329999	4	0.0126366872610374	0.101935421241764	0.050967710620882	0.812451703883116	0.887519798861141	-0.106351981172334	-0.155443624737581	0.0248581836159087	-0.0835647166391313	4	-0.0801255347332842	0.0761447093047614	0.0380723546523807	0.079971985398622	0.245936227731469	0.0493980937395968	-0.0401351121888048	0.0190858411308984	-0.0455326167333202	4	-0.00429594851290746	0.0462409152132216	0.0231204576066108	0.858718388038262
J3KNF8	0.0346690167680452	0.0135813116368337	0.135219608788137	-0.0946167156158284	4	0.0222133053942968	0.0942502599077263	0.0471251299538631	0.654028846564262	0.788643479522842	-0.0583694106338909	-0.158238215822184	0.0646090814230763	0.0433460299255871	4	-0.0271631287768529	0.102547859553784	0.0512739297768921	0.615296084834626	0.802087134305767	-0.0736333032323404	0.00220595614980756	0.0959944748714564	0.104164592900477	4	0.0321829301723502	0.0843582978125567	0.0421791489062783	0.474380501607158	0.662685885563049	0.055080525192647	-0.113507667570167	0.100563966567284	-0.063846482024626	4	-0.00542741445871552	0.0999825187729622	0.0499912593864811	0.917085459393698	0.962094840359694	0.0228509391280375	-0.0742161074319109	0.0565163497190182	0.0630337404860435	4	0.0170462304752971	0.0633383779208538	0.0316691889604269	0.609769345614628
J3KNI1	NA	-0.0112078728277361	0.0818057183465495	0.0200787651060919	3	0.0302255368749684	0.0473296922531885	0.0273258105630405	0.243397298979278	0.430035087559531	NA	-0.0691546722397589	-0.157783339913372	0.0554951125917035	3	-0.0571476331871423	0.107145001357264	0.0618601953759394	0.319800000409045	0.573916405902147	NA	-0.280581063238809	-0.0224212947077952	-0.0268832941509475	3	-0.109961884032517	0.147777385260835	0.085319313160482	0.184081289944588	0.370975484001794	NA	-0.167652682432798	0.0879165902840811	-0.0524674198941356	3	-0.0440678373476176	0.127991515458938	0.0738959359042059	0.507858230040737	0.714376457875336	NA	-0.00136554202422942	-0.188160786517149	-0.0970366342271215	3	-0.0955209875894998	0.093406845197983	0.0539284672192092	0.0878330200860254
J3KNR0	0.0214331896113511	0.172816588748536	-0.124859829910781	-0.0744388336781981	4	-0.001262221307273	0.130957625764726	0.0654788128823631	0.985245347733899	0.991496099068552	0.0593969999941099	0.0421965636542076	0.0218594339637393	-0.102569733640548	4	0.00522081599287725	0.0734799542421967	0.0367399771210984	0.891651145137853	0.946272233376607	0.0296049042330647	0.0605264210097763	-0.180230009834051	-0.182744087498509	4	-0.0682106930224298	0.131412025559492	0.0657060127797462	0.339228538672776	0.540014677413272	-0.0320886376768537	0.070995629661569	-0.049042622936519	-0.246269523354388	4	-0.064101288576548	0.132524232133844	0.0662621160669219	0.370709152213125	0.60668044677125	0.0534392589614605	0.186661265793394	-0.0443395390107351	-0.430999794034832	4	-0.0588097020726783	0.265575272124612	0.132787636062306	0.673369226895313
J3KP15	-0.177875618612056	-0.0711958746916662	-0.0820279143226109	-0.128019873883042	4	-0.114779820377344	0.0487463723212964	0.0243731861606482	0.00329438829325723	0.0261389391352142	-0.0323954759253805	-0.0953069600957274	-0.0959440860955089	-0.134991211332925	4	-0.0896594333623855	0.0424480951025179	0.0212240475512589	0.00553411121997961	0.0543169422662285	-0.0673516022736738	-0.123224735299552	-0.217551636039785	-0.248019996859168	4	-0.164036992618045	0.0835277740542926	0.0417638870271463	0.00773296319931076	0.0471844944536324	-0.0484046319630541	-0.217549126679806	-0.065095028221885	-0.137503523749935	4	-0.11713807765367	0.0773086793572645	0.0386543396786323	0.0230860620391877	0.109045571163226	-0.258435171261979	-0.126896424108088	-0.0919454712578454	-0.218894977100221	4	-0.174043010932033	0.0776671150144645	0.0388335575072322	0.00418448827476323
J3KP36	-0.0135592637281541	0.0415720554702836	0.0901530610600693	-0.095887252942233	4	0.00556964996499145	0.0798121651572245	0.0399060825786122	0.893567670642548	0.943225437799114	0.0439433475875972	-0.182330022333093	0.0418651257667867	-0.15410003428063	4	-0.0626553958148347	0.122436336740224	0.0612181683701118	0.345562904047228	0.597232118885592	0	-0.0946555831027814	0.144797323712198	0.0044322463152607	4	0.0136434967311694	0.0986593620526845	0.0493296810263423	0.791384887953542	0.876000189045609	0.112657800769462	0.0518175279777043	0.204649599201461	-0.0985322922371026	4	0.0676481589278813	0.127360137302874	0.0636800686514372	0.32896919132286	0.570853251362905	0.035164200566889	-0.0359310440145747	0.14762996175196	0.146389486981523	4	0.0733131513214492	0.0899125052562349	0.0449562526281175	0.154061125136161
J3KPD6	0.0953007976423521	0.00123996143506536	0.0776138653997231	0.0943725474534058	4	0.0671317929826366	0.0446734777189119	0.022336738859456	0.0238401958112844	0.0987245369007026	0.0272000837530206	0	-0.0142294363041394	0.0585164645669405	4	0.0178717780039554	0.032087880593916	0.016043940296958	0.307933215384883	0.567598607044283	0.00497653146402599	-0.0437043956560259	0.0487955038348441	0.042285145313799	4	0.0130881962391608	0.0424996911776903	0.0212498455888452	0.560571004000351	0.726689182734577	0.0254066069985442	-0.0183085584129378	0.105950513114343	0.0819416135361761	4	0.0487475438090313	0.0560218592419937	0.0280109296209969	0.132454625151743	0.33777877962469	0.0991168333561048	-0.0206200991041747	0.104417894930661	0.119565698905813	4	0.075620082022101	0.0647425698647517	0.0323712849323759	0.0581594234444225
J3KPG6	-0.107849827333615	0.00371669172727793	-0.136175143138615	-0.164879051293695	4	-0.101296832509662	0.0737788974157596	0.0368894487078798	0.0334704785730305	0.123869099421807	-0.00114454194094088	0.0437951178796848	-0.173666381520027	-0.249893306145728	4	-0.0952272779317526	0.139347360941267	0.0696736804706333	0.220697147587753	0.478401180025634	-0.112986805890264	0.0679167520524561	-0.197788381218356	-0.166046041822573	4	-0.102226119219684	0.118700628279286	0.0593503141396431	0.13576984607572	0.301475983659417	-0.071305034073133	0.0761820763769042	-0.184950686152395	-0.226040198351592	4	-0.101528460550054	0.135347615442214	0.0676738077211071	0.184214887590545	0.413423611868016	-0.0862855047051526	-0.00273237778813554	-0.230566352782148	-0.130377709342044	4	-0.11249048615437	0.09486025939622	0.04743012969811	0.055391285141717
J3KQ18	0.0516960283286979	-0.00621584348398194	0.0378911386437953	0.290911541500293	4	0.0935707162472011	0.133858711165818	0.0669293555829092	0.211596518116089	0.395337623155092	-0.227550025784012	-0.253186619877447	-0.0078879094303127	0.046392905484451	4	-0.11055791240183	0.15188240136713	0.0759412006835652	0.195687016628895	0.454348580083832	0.0217694740245553	-0.0677976759657629	-0.15714639672101	0.135484356113283	4	-0.0169225606372336	0.125134518799316	0.0625672593996578	0.795861847726172	0.879024612961716	0	0.0359344863710491	0.019159578283455	0.289080729356943	4	0.0860436985028619	0.136151842475093	0.0680759212375465	0.253136168909799	0.492743489127059	0.0228509391280375	0.156364162447778	-0.361323044091498	-0.104546776334401	4	-0.0716636797125208	0.220539909759915	0.110269954879958	0.53983048163878
J3KQ48	0.00673214026492217	0.125840972367887	0.132528012781871	0.162903929124222	4	0.107001263634725	0.068764221940752	0.034382110970376	0.0207925788992115	0.0893640688999582	0.0908910290992226	0.00493229554223065	0.178812804762826	0.270089163367744	4	0.136181323193006	0.114055937854307	0.0570279689271534	0.0541756748738918	0.222517751554042	0.0528590550889637	0.115562124287564	0.267875191130456	0.13951986934844	4	0.143954059963856	0.09033366061557	0.045166830307785	0.0189039460167572	0.0846616723091215	-0.019662246977036	-0.00546821263951319	0.179323699444562	0.0324214776923773	4	0.0466536793800975	0.0911379604502501	0.045568980225125	0.345420704893002	0.586962782963207	-0.0664163989690497	0.0243612830941396	0.0847890881817281	0.156478304605107	4	0.0498030692279812	0.0944420044871947	0.0472210022435974	0.332178043138214
J3KQN4	0.225666241828959	0.0306837393275473	0.140587782575822	0.169264093903662	4	0.141550464408998	0.0819265255321902	0.0409632627660951	0.0135408048500491	0.0668003330763307	0.144662285540203	0.0816384690243574	0.18712807297483	0.116202372017203	4	0.132407799889148	0.0446640106950959	0.022332005347548	0.00102655256876802	0.0200210865508756	0.160254756941937	0.150788378271311	0.132360220473975	0.119228465355363	4	0.140657955260647	0.0183914431797453	0.00919572158987266	4.93124924513037e-06	0.000451732317213003	0.231777532400728	0.0605664634672961	0.162189352662707	0.0995356735509143	4	0.138517255520411	0.0749527343096086	0.0374763671548043	0.0101348540017246	0.0653255088426727	0.265126784795034	0.174618666312545	0.0930002375009683	0.148918313292262	4	0.170416000475202	0.0717475806275407	0.0358737903137704	0.00315731543314058
J3KR44	-0.0648666567828692	0.066663036433114	-0.0223216681983433	-0.0397926908713068	4	-0.0150794948548513	0.057224103448039	0.0286120517240195	0.617079523533307	0.764834522198109	-0.0137947987202622	0.132103536007345	-0.111157180042016	-0.0349954213562039	4	-0.00696096602778425	0.101699588160438	0.0508497940802189	0.895593568168862	0.946636138662402	-0.0894582703940228	0.122676520731049	0.0321552381470159	-0.0604358538619739	4	0.00123440865551713	0.0961468799874573	0.0480734399937287	0.980347231821873	0.99007508233708	-0.0370893187352201	0.106915203916512	0.0641303374197156	-0.115347110097767	4	0.00465227812580997	0.100229003804929	0.0501145019024646	0.929058405481951	0.96611517023118	-0.048981805633029	-0.00273237778813554	0.00696955481484174	-0.10304161705245	4	-0.0369465614146932	0.0503740644547403	0.0251870322273701	0.192772547407157
J3KR55	0.0838860081000251	0.129247573811137	-0.0193254157384236	-0.00476530587138674	4	0.0472607150753379	0.0711891301787112	0.0355945650893556	0.232538190833893	0.418181410405032	0.293038562463517	0.1544713490358	0.0403360370800421	-0.0975165059142624	4	0.0975823606662741	0.166112605505886	0.0830563027529429	0.284547706135746	0.54452731922548	0.0344805257741092	0.115562124287564	0.0404993622797528	0.0394083845582354	4	0.0574875992249154	0.0388047853041001	0.01940239265205	0.025187679102044	0.0995324887914759	0.0656154647988375	0.137007269072948	0.00961159478429147	-0.0885366746016575	4	0.0309244135136048	0.0951879353328108	0.0475939676664054	0.539913845313637	0.734977270516769	0.0104316798739695	0.0509554931058528	0.0781863533574811	-0.0169067759948854	4	0.0306666875856045	0.042199700783471	0.0210998503917355	0.196332674316963
J3KR97	-0.0977052699280722	-0.110832846929011	0.069193442424423	-0.174242890643688	4	-0.078396891269087	0.10391385358698	0.05195692679349	0.182062842188947	0.359958124223143	-0.0359099601016175	-0.0417717379152108	-0.0237943003396734	-0.212993723334198	4	-0.078617430422675	0.0898964158839121	0.044948207941956	0.130859318067194	0.367196954447337	-0.223888734391123	-0.0735939675749517	0.0170131103762079	-0.397876948120661	4	-0.169586634927632	0.181750050194266	0.0908750250971329	0.111270752066885	0.262962252959267	-0.128863512442882	-0.00546821263951319	-0.0410829059680424	-0.211504105193712	4	-0.0967296840610374	0.0924319042159633	0.0462159521079817	0.0812611765585425	0.247883488129641	-0.175694740254043	0.0216746993738389	-0.0371529984174659	-0.798975256441631	4	-0.247537073934825	0.376820836364091	0.188410418182046	0.236903503440373
J3KRX5	0.0373016726827023	0.064292131970367	0.0507788227259249	0.14795358765825	4	0.0750815537593111	0.0498152824507756	0.0249076412253878	0.0235665436553021	0.0982643606482459	-0.0583694106338909	-0.0485689002689748	0.0172030715325178	0.0824621601919729	4	-0.00181826979459378	0.0654437552013971	0.0327218776006986	0.957490586733864	0.975891451010273	-0.0210909400878366	0.0605264210097763	0.00512503217786747	0.036525876025114	4	0.0202715972812303	0.0357068170099121	0.0178534085049561	0.299500022036766	0.497466245394036	0.0193978726112532	0.0657904705303085	0.082462160191973	0.114035243246029	4	0.070421436644891	0.0394630336881995	0.0197315168440997	0.0117986444653584	0.072055155997532	0.00626805493243332	0.0809448114605073	0.0548358660801003	0.145123409637531	4	0.071793035527643	0.0578566258017662	0.0289283129008831	0.0476916962832579
J3KS15	0.0094162248361337	0.112133552947289	-0.0419504749472759	0.00474961759321813	4	0.0210872301073413	0.0649777272300058	0.0324888636150029	0.540333056804249	0.707298874868703	-0.0300572338561796	-0.109451142415997	-0.0190039416244867	0.0140751852117228	4	-0.0361092831712351	0.0523664307061351	0.0261832153530676	0.217066752850989	0.475554691802777	0.0982722222578437	0.0402739969833272	-0.0487325718236424	-0.0466153592751318	4	0.0107995720355992	0.0715559379152557	0.0357779689576279	0.772955603424422	0.865591347830569	-0.0484046319630541	0.0553234714792398	-0.065095028221885	-0.2187538442731	4	-0.0692325082446998	0.113021740068081	0.0565108700340407	0.266438783993152	0.508166841647507	-0.0664163989690497	0.0705842998547855	0.0242475462466773	-0.0070204276777725	4	0.00534875486366014	0.0574922447738352	0.0287461223869176	0.858522204713209
J3KS22	-0.0747821256479521	-0.147461768919733	-0.0882937006793506	-0.120242523291323	4	-0.10769502963459	0.032652227920421	0.0163261139602105	0.000583345051921053	0.00799703360169248	-0.0465050753408164	0.0596839903830486	-0.0759063328589638	-0.0593521344933944	4	-0.0305198880775315	0.0613283341380813	0.0306641670690406	0.358022454349611	0.605314250279013	-0.03226286881248	-0.0597217929933942	0.0537503857776089	-0.128358508716668	4	-0.0416481961862334	0.0753531839878006	0.0376765919939003	0.311324113705467	0.509546722106998	-0.0458824371932261	0.00725885828649331	-0.0752192454955923	-0.0736719118806994	4	-0.0468786840707561	0.0385267460286764	0.0192633730143382	0.0509150051616172	0.185217882796112	0.0493980937395968	-0.110594611778988	0.071553261025034	-0.139606067295582	4	-0.0323123310774847	0.108173804669557	0.0540869023347784	0.572071270802063
J3KSI8	-0.15365351694674	-0.516523839398191	-0.233510085198041	-0.477834926521646	4	-0.345380592016154	0.178986445915304	0.0894932229576519	0.00836916135055814	0.0480988113360024	-0.00688091149008552	0.0753997780446009	0.104665912782857	-0.056080715765342	4	0.0292760158930076	0.0739462260142704	0.0369731130071352	0.458617581754084	0.686337103783464	-0.146805780736292	-0.325519983275668	-0.0665438479401028	-0.179388981240129	4	-0.179564648298048	0.108243299076392	0.0541216495381959	0.0160482699327662	0.0760406269698312	-0.202793853859337	-0.304747568581675	-0.065095028221885	-0.289506617194985	4	-0.215535766964471	0.109886614978966	0.0549433074894828	0.00777621129669377	0.0563155150810464	-0.0996852453763438	-0.340127274021268	-0.0808192332774659	0.00279863335267339	4	-0.129458279830601	0.147338054179595	0.0736690270897976	0.129378304310684
J3KT75	-0.0135592637281541	-0.105484573738568	-0.369972327747313	0.00356367832307508	4	-0.12136312172274	0.172517673272874	0.0862588366364368	0.209067677826953	0.392394810736937	-0.146800528620108	-0.553199938336368	0.120671770803141	-0.318788387356795	4	-0.224529270877532	0.284086081577182	0.142043040788591	0.165026696030172	0.413996750129684	-0.230892122128885	-0.531864463380245	-0.31212105669735	-0.086908065223165	4	-0.290446426857412	0.185945366354108	0.0929726831770539	0.0204804243261867	0.0886996027765935	-0.241230035515445	-0.300260177589361	-0.0155129993713246	-0.485426827170242	4	-0.260607509911593	0.19370326539801	0.096851632699005	0.0360147108055443	0.148529973758745	-0.187568840542334	-0.208131728211278	-0.312787441030893	-0.225430413150167	4	-0.233479605733668	0.0550903364064332	0.0275451682032166	0.000147418767342071
J3KTA4	0.101603538295335	0.0994529715507834	0.102584210608882	0.117579938614731	4	0.105305164767433	0.00828701531552404	0.00414350765776202	2.44496214402711e-07	7.95327829627497e-05	0.0483755939028579	0.0180032346998905	-0.0302062888539074	0.0418201756946269	4	0.019498178860867	0.0356134132549675	0.0178067066274837	0.315517381652208	0.572170992642246	0.100133764504366	0.0888257418154366	0.0034187102274644	0.0176478658194246	4	0.0525065205916729	0.0490312115966389	0.0245156057983195	0.0759656374046563	0.208388495348708	0.120538323903708	0.0847849345511657	0.0361883076152968	0.195374870697968	4	0.109221609192035	0.0670359771731509	0.0335179885865754	0.0172791498691747	0.0921249912778044	0.0412816445352248	0.0575281470293391	0.0104417467216468	0.0670505274174361	4	0.0440755164259117	0.0248184110750738	0.0124092055375369	0.0120452443175007
J3KTG7	NA	NA	NA	NA	0	NA	NA	NA	NA	NA	NA	NA	NA	NA	0	NA	NA	NA	NA	NA	NA	NA	NA	NA	0	NA	NA	NA	NA	NA	NA	NA	NA	NA	0	NA	NA	NA	NA	NA	NA	NA	NA	NA	0	NA	NA	NA	NA
J3KTL2	0.189436272899722	0.0808072187533838	-0.0882937006793506	0.143653450224625	4	0.0814008102995948	0.121578002072971	0.0607890010364855	0.229044477802668	0.41437441655923	0.100526875953965	0.160377990002522	-0.171892939328808	-0.0642732138784498	4	0.00618467818730723	0.152043831512005	0.0760219157560023	0.93780642623085	0.966253860428037	0.143202486396252	0.0615845032287394	-0.195826864885069	-0.101121924442866	4	-0.0230404499257359	0.153568614882319	0.0767843074411595	0.774250414996315	0.865591347830569	0.0760740328464695	0.110289930697168	-0.043068721891886	0.0263018713124791	4	0.0423992782410577	0.0666008892463162	0.0333004446231581	0.250038015647706	0.488600466259221	0.184508324586749	0.0162864763378076	-0.238786859587117	-0.1442424774163	4	-0.045558634019715	0.186038769455017	0.0930193847275086	0.64168369342586
J3QLR8	0.0990857452638158	-0.0351587992949411	-0.0711278459729914	-0.143701496115312	4	-0.0377255990298571	0.101768582663869	0.0508842913319344	0.486445238390475	0.660019728749733	0.100526875953965	0.0549356754848853	0.184361638683454	-0.0874628412503395	4	0.0630903372179911	0.113784856998571	0.0568924284992854	0.309915315039943	0.568492810187114	-0.236754361161545	0.0721228630226671	-0.00342683068693803	-0.105891168590738	4	-0.0684873743541385	0.133811977378673	0.0669059886893363	0.345493698904908	0.545392925216468	0.156025310078982	-0.0146282119249891	-0.0410829059680424	-0.125530882083859	4	-0.00630417247447716	0.118102665968419	0.0590513329842094	0.918461450662273	0.962488606879601	0.0493980937395968	-0.0799753767205959	-0.244983125551022	-0.134984509555204	4	-0.102636229521806	0.122388724602531	0.0611943623012655	0.144512015891201
J3QQ67	-0.027247175143223	-0.0338882619685365	0.0479248256707719	-0.013142654409325	4	-0.00658831646257815	0.0373573619597982	0.0186786809798991	0.736359539388719	0.8438267200804	-0.108059745857453	-0.154567234093687	0.0510057796232557	-0.015801856122893	4	-0.0568557641126943	0.0921754036076533	0.0460877018038266	0.263466413763914	0.522954017602307	0.00199267302520478	-0.0958347372680464	-0.0522772788670546	-0.086908065223165	4	-0.0582568520832653	0.0443424177697185	0.0221712088848592	0.0391858294849998	0.133700634913267	-0.0147215057067656	-0.0518611181239644	0.015347964333436	-0.0267903008875351	4	-0.0195062400962073	0.0279141835118736	0.0139570917559368	0.211729409078814	0.447906230682473	-0.0210924084595593	-0.041539195064488	-0.0140409384776966	-0.0806506599882386	4	-0.0393308004974956	0.0299133407251024	0.0149566703625512	0.0390779439753221
J3QQJ5	NA	NA	NA	NA	0	NA	NA	NA	NA	NA	NA	NA	NA	NA	0	NA	NA	NA	NA	NA	NA	NA	NA	NA	0	NA	NA	NA	NA	NA	NA	NA	NA	NA	0	NA	NA	NA	NA	NA	NA	NA	NA	NA	0	NA	NA	NA	NA
J3QR07	NA	NA	NA	NA	0	NA	NA	NA	NA	NA	NA	NA	NA	NA	0	NA	NA	NA	NA	NA	NA	NA	NA	NA	0	NA	NA	NA	NA	NA	NA	NA	NA	NA	0	NA	NA	NA	NA	NA	NA	NA	NA	NA	0	NA	NA	NA	NA
J9JIE6	-0.207177754460254	-0.0974991564459093	-0.0867247010240099	-0.0882807588318287	4	-0.1199205926905	0.058365456089257	0.0291827280446285	0.00629130115665538	0.0407951135873051	-0.193135484736837	-0.102361717629678	-0.0925850740055942	-0.15410003428063	4	-0.135545577663185	0.0469312926818123	0.0234656463409062	0.00117617644022049	0.021813382691942	-0.134714551523673	-0.128041751597328	-0.073730388533372	-0.187791422235826	4	-0.13106952847255	0.0466461996555145	0.0233230998277572	0.00135605380143787	0.0150711420652451	-0.0320886376768537	-0.0594244122004331	-0.108102607309376	-0.103556191826597	4	-0.075792962253315	0.0364815364145838	0.0182407682072919	0.0059767012444223	0.0475462312154964	-0.0403428873591564	-0.0670492022763258	-0.0734491276404559	-0.150447626943009	4	-0.0828222110547367	0.0473086754352396	0.0236543377176198	0.0128052387674703
K4DIA7	NA	NA	NA	NA	0	NA	NA	NA	NA	NA	NA	NA	NA	NA	0	NA	NA	NA	NA	NA	NA	NA	NA	NA	0	NA	NA	NA	NA	NA	NA	NA	NA	NA	0	NA	NA	NA	NA	NA	NA	NA	NA	NA	0	NA	NA	NA	NA
K7EIE8	-0.00405441496131459	-0.180820365866164	-0.235247225734098	0.0719176966257098	4	-0.0870510774839668	0.144815163722256	0.0724075818611278	0.274561642371084	0.462137998267142	0.153946733291679	-0.303111845209129	0.119224008473026	0.362220800835396	4	0.0830699243477431	0.278921859324384	0.139460929662192	0.573175535618849	0.77894699841345	0.124117738258786	0.138807450944865	-0.00858238724273069	0.143544125907234	4	0.0994717319670386	0.0725092936559496	0.0362546468279748	0.0335708717966006	0.120100290462868	0.228655940759018	-0.186162209835555	0.0861007372553212	0.00778574496659536	4	0.0340950532863449	0.172977813376407	0.0864889066882034	0.707053459986209	0.849917702838368	0.272079545436801	-0.0542378153069876	-0.112569143383697	0.136229620761301	4	0.0603755518768545	0.176652683922945	0.0883263419614723	0.51976884927138
K7EIG1	0.0813370762693299	0.0439805619410053	-0.189063357855885	-0.233136579697256	4	-0.0742205748357016	0.159804936266686	0.0799024681333432	0.388788239033937	0.570260478699463	0.084431189765133	0.0691339916878611	-0.213244039122263	-0.270597699910263	4	-0.0825691393948827	0.185592401881209	0.0927962009406044	0.407836144860483	0.646354201374232	0.0393397255206941	-0.0459817363670918	-0.253822416132683	-0.465734035365793	4	-0.181549615586219	0.225946079876667	0.112973039938334	0.15917443956459	0.335553926641393	0.156025310078982	0.0323810485132946	-0.169683929499085	-0.249978253008348	4	-0.0578139559787889	0.185566141462417	0.0927830707312085	0.556141410295426	0.747206881476921	0.124308924809981	0	-0.214264540453048	-0.202684749918962	4	-0.0731600913905072	0.164350757065097	0.0821753785325486	0.407587171125469
K7EII0	0.14007768610997	NA	0.705315799556925	1.18399633758378	3	0.676463274416892	0.522557067581085	0.301698463634881	0.043824241049147	0.14885469740626	-0.18530891016651	NA	0.439992846535548	0.778785769860833	3	0.344489902076624	0.489091246409603	0.282376962772874	0.204603753777409	0.463308724845773	0.293127614366964	NA	0.435429288110022	0.77896332140138	3	0.502506741292788	0.249767135751528	0.144203123060867	0.00878118371913657	0.051544695889223	-0.0320886376768537	NA	-0.129041945001739	0.842608845805394	3	0.227159421042267	0.535194807319032	0.308994866074533	0.419790276438479	0.65000285366933	-0.88920136159626	NA	0.559115481294283	0.900714425269316	3	0.190209514989113	0.950272771365842	0.54864024035164	0.695775668081604
K7EIN2	-0.0203869860832758	-0.0882383586806617	-0.0118618965533042	0.144729686783964	4	0.00606061136668045	0.0985597956066782	0.0492798978033391	0.906136335412536	0.949809341869659	-0.0571785768552688	-0.0743473414600813	0.0795749318200266	-0.00157241981875358	4	-0.0133808515785193	0.0693189977705936	0.0346594988852968	0.712766246494948	0.849156917647861	-0.0704890338274334	0.150788378271311	0.0371675015820047	-0.0238714036188422	4	0.0233988606017601	0.0956853860077507	0.0478426930038753	0.642148648807409	0.784572728094004	-0.328963407448996	-0.0939586551653823	0.0361883076152968	-0.235200197637068	4	-0.155483488159037	0.160180542448316	0.0800902712241581	0.100253662653582	0.281399092109357	-0.136038539902252	-0.125406805967602	0.0665583511046417	-0.12578557270874	4	-0.080168141868488	0.0979415673460163	0.0489707836730081	0.15273256526693
K7EIR0	NA	-0.129709499942114	-0.00888726654919299	-0.120242523291323	3	-0.0862797632608765	0.0671908090602994	0.0387926316980326	0.044973425685895	0.150558876908594	NA	-0.109451142415997	0.0494863534260549	-0.0774787526777174	3	-0.0458145138892199	0.0840669370780024	0.048536068751932	0.310439087032523	0.569106949726694	NA	-0.0380267218940753	-0.00171239787568619	-0.0790715709911987	3	-0.0396035635869867	0.038703685077423	0.0223455829980807	0.0876910019444185	0.22793628450385	NA	-0.318294100419623	0.0229611484433112	-0.165248514232839	3	-0.15352715540305	0.170929309683092	0.09868608295793	0.122059872864886	0.318092237647026	NA	-0.170778313728909	-0.105035470698289	-0.0426443374084937	3	-0.106152707278564	0.064074293871274	0.0369933108147152	0.0186411611071119
K7EJQ7	-0.0592311221134365	0.150637903833972	0.0321261158240331	-0.0483765370920018	4	0.0187890901131417	0.096885432217893	0.0484427161089465	0.711505038458446	0.829174915674588	0.16419319000572	0.0341771153180878	-0.0318137486757932	0.114751698148478	4	0.0703270636991231	0.0866486432560144	0.0433243216280072	0.155657975045691	0.399515929023853	0.48271807537129	0.261746038677147	-0.10836402363473	-0.029901485713862	4	0.151549651174961	0.272210336831977	0.136105168415989	0.308112599541388	0.505659277097511	0.300780320021164	0.164862553125791	-0.0915672395830761	0.219713321140567	4	0.148447238676111	0.169470385322845	0.0847351926614225	0.130348325113007	0.333087900943888	-0.163917572477689	0.096347395919867	-0.0193417223010055	-0.0821326272894693	4	-0.0422611315370742	0.109738551414081	0.0548692757070404	0.470401497228837
K7EJX0	NA	NA	NA	NA	0	NA	NA	NA	NA	NA	NA	NA	NA	NA	0	NA	NA	NA	NA	NA	NA	NA	NA	NA	0	NA	NA	NA	NA	NA	NA	NA	NA	NA	0	NA	NA	NA	NA	NA	NA	NA	NA	NA	0	NA	NA	NA	NA
K7EK35	0.305368613526337	0.0379517397915865	NA	0.344350800461753	3	0.229223717926559	0.16678917812411	0.0962957768878711	0.036028580042326	0.129505823386387	0.494063306021886	0.288608021687336	NA	0.103093492964104	3	0.295254940224442	0.195569641880172	0.112912185384836	0.0260922104175003	0.144994029581073	0.331666000445114	0.162670628343054	NA	0.0044322463152607	3	0.166256291701143	0.163646341837413	0.0944812595117279	0.0893880153560396	0.23010184431177	0.157120334830519	0.31280285863976	NA	0.198099508034504	3	0.222674233834928	0.0806982026815233	0.0465911290412964	0.00229740733195032	0.0257224532017994	0.45428287665755	0.240798100225275	NA	0.203459672475423	3	0.299513549786082	0.135328112201025	0.0781317220081854	0.00593751053720278
K7EK60	-0.176349764381095	0.0631052170199249	0.00442318703418532	0.0387245179034915	4	-0.0175242106058734	0.108585248926609	0.0542926244633045	0.757818545657455	0.856726052177444	-0.150605440823538	0.0675632838126346	0.160630270797754	0.15200309344505	4	0.0573978018079752	0.144885920444411	0.0724429602222056	0.458348375393116	0.686337103783464	-0.103315071069422	0.108412470514203	0.119814967154862	0.0451561811685541	4	0.0425171369420494	0.102617651162174	0.0513088255810868	0.439014407486084	0.630619689585937	-0.0320886376768537	0.070995629661569	-0.049042622936519	-0.0885366746016575	4	-0.0246680763883653	0.068019423064797	0.0340097115323985	0.495556858962338	0.704641761356137	-0.0885101698196664	-0.0799753767205959	0.101164917135573	-0.106053507584555	4	-0.0433435342473111	0.0969486979952985	0.0484743489976492	0.405675748575118
K7EKE6	-0.152153053950449	-0.136511469359193	-0.0773463687081488	-0.106092034948289	4	-0.11802573174152	0.0331844356708334	0.0165922178354167	0.000388096680610786	0.00601649366916105	-0.181411487604712	-0.149078216536708	-0.0627007940596963	-0.104258083793318	4	-0.124362145498609	0.0518710168289988	0.0259355084144994	0.00301596976056533	0.0387969216433574	-0.169052868311023	-0.119622498619357	-0.073730388533372	-0.125127387453655	4	-0.121883285729352	0.0389842121191389	0.0194921060595694	0.000775793453297886	0.0110623755156581	-0.150376605064332	-0.153418789260091	-0.110182917750423	-0.156520749920307	4	-0.142624765498788	0.0217728717596056	0.0108864358798028	1.21972133562799e-05	0.00100677333975852	-0.147589402573689	-0.138869065774164	-0.0771294741284046	-0.124258102962146	4	-0.121961511359601	0.0313997882139928	0.0156998941069964	0.000239418519680404
K7EL66	-0.0424554093626097	NA	0.0161524796162924	0.00593458278582204	3	-0.00678944898683173	0.0313072978881036	0.0180752768632964	0.672255200481559	0.801667641442111	-0.228890197771595	NA	0.122118081742206	0.0093986980022496	3	-0.0324578060090466	0.179208477109331	0.103466062500135	0.723076442252511	0.855857511718615	0.0217694740245553	NA	-0.00686182050225903	0.159529830079934	3	0.05814582786741	0.0889605231832753	0.051361382007114	0.233981351012123	0.426613766049245	-0.183259966878115	NA	0.0455625773804438	0.0848888975865129	3	-0.0176028306370529	0.144804540522492	0.0836029404505408	0.811321194412911	0.910990417455968	-0.0929698180103663	NA	0.0765309371794193	0.00419591679447863	3	-0.00408098801215613	0.0850529650709514	0.0491053522790896	0.924734580517304
K7EL95	NA	-0.346007448301814	-0.216252761713241	-0.0143433994148762	3	-0.19220120314331	0.167135030538937	0.0964954548726714	0.0631121137068681	0.186823315970185	NA	-0.0743473414600813	-0.0610585684516504	-0.131543909714456	3	-0.0889832732087294	0.0374526862434041	0.021623318484504	0.00440303323565315	0.0477074174601415	NA	-0.129248522927322	-0.119475978754955	-0.112274785381592	3	-0.120333095687956	0.00851926808155846	0.00491860172018636	8.76809297068239e-07	0.000132529725251864	NA	-0.16561065089458	-0.303720476414686	-0.0299750594454899	3	-0.166435395584918	0.136874572075177	0.0790245710328185	0.0533503753577532	0.189739040831162	NA	-0.272620454662992	-0.105035470698289	-0.170800688899176	3	-0.182818871420152	0.0844364213236388	0.0487493905806115	0.00650475642535786
K7ELL7	-0.00540842260729001	0.0343223163908956	0.123067683532804	-0.00357250295855355	4	0.0371022685894641	0.0601647089444641	0.030082354472232	0.263565778815044	0.450400988896482	0.0361539994820345	-0.0383851282828833	0.127888869600154	0.0341666031511916	4	0.0399560859876242	0.0681114142674459	0.0340557071337229	0.28515547387911	0.544551482966867	0.0672048316393671	0.0262514301164586	0.211348516620804	0.0665087422408284	4	0.0928283801543645	0.0812994518283556	0.0406497259141778	0.0624888782923669	0.183802006710548	-0.0333371838741124	-0.00546821263951319	0.162189352662707	0.018615678167347	4	0.0354999085791071	0.0870865943231327	0.0435432971615663	0.446060795869009	0.669201878864523	0.00626805493243332	0.0216746993738389	0.184983376234329	0.0482090930426198	4	0.0652838058958053	0.0816581206242647	0.0408290603121324	0.160946936325472
K7EMM8	0.497330952806193	0.253076160663995	0.165817330992142	0.152240946061348	4	0.267116347630919	0.159847573168761	0.0799237865843803	0.0155703676650869	0.0736607534453171	0.336272060215429	0.00164597284355963	-0.119678734887869	-0.27249473508286	4	-0.0135638592279352	0.258793402048654	0.129396701024327	0.919931974301374	0.958356585144135	0.51167889935476	0.0763167469088581	0.0521006485585161	-0.138095520081955	4	0.125500193685045	0.274726043960547	0.137363021980274	0.396135291269795	0.593417733155892	0.590647205676228	0.110289930697168	0.15007306634665	0.0745469533650539	4	0.231389289021275	0.241483713453541	0.12074185672677	0.103783354614988	0.287042160110803	0.116604260084946	0.135392595482884	0.158624969009893	-0.188249659655393	4	0.0555930412305823	0.163467813959659	0.0817339069798296	0.52176123648907
K7EMQ3	NA	NA	NA	NA	0	NA	NA	NA	NA	NA	NA	NA	NA	NA	0	NA	NA	NA	NA	NA	NA	NA	NA	NA	0	NA	NA	NA	NA	NA	NA	NA	NA	NA	0	NA	NA	NA	NA	NA	NA	NA	NA	NA	0	NA	NA	NA	NA
K7ENL9	-0.26438461186673	-0.23089413428673	-0.121643117227238	-0.128019873883042	4	-0.186235434315935	0.0722562853975344	0.0361281426987672	0.00210525519860252	0.0187734114022874	-0.137961231571315	0.487307785769006	0.272964242454134	-0.126388353158664	4	0.12398061087329	0.308491439897677	0.154245719948839	0.452180821212727	0.684670145249213	-0.254485371411214	0.122676520731049	0.107159666348833	-0.138095520081955	4	-0.0406861761033217	0.185960963695822	0.0929804818479108	0.677004324774697	0.810528346056994	-0.0700232080973029	0.0394791934144613	0.255621905233586	-0.085220132817193	4	0.0349644394333879	0.157243799833209	0.0786218999166045	0.672117535817718	0.827284735658371	-0.218906807075341	0.4289602851438	-0.024662054234269	-0.131911675505581	4	0.013369937082152	0.288225029330667	0.144112514665334	0.929103094676396
K7ENR6	-0.0620461377204905	NA	-0.074233756840813	-0.0545392762404932	3	-0.0636063902672656	0.00993951369717764	0.00573858090867948	4.37939451536926e-05	0.00145134191234182	-0.023065160197863	NA	-0.104375992276764	-0.0675632838126346	3	-0.0650014787624206	0.0407159058253319	0.0235073391885548	0.0213577275054233	0.127345976822277	-0.0862793597265152	NA	-0.0845777707703644	-0.161074083860047	3	-0.110643738118975	0.0436822467361388	0.0252199569119174	0.00334373922923814	0.0284694423728427	0.0157805826905786	NA	-0.0272582070444239	-0.122128297863019	3	-0.0445353074056215	0.070559113384132	0.0407373231061099	0.248197573975243	0.486892450439429	0.0654952765365312	NA	-0.0175726294479498	-0.12578557270874	3	-0.0259543085400527	0.0959154848306583	0.0553768309864341	0.599521419421279
K7EQY5	-0.135750142939379	-0.17801083227934	-0.159075545248694	0.0865530429941067	4	-0.0965708693683267	0.123300020035598	0.061650010017799	0.168287802240108	0.343507107475927	0.0147970019280807	0.0373902459132739	-0.00157413549811045	0.0690416444296512	4	0.0299136891932239	0.0305880865645234	0.0152940432822617	0.0982513954383088	0.317794131742441	-0.0538343606633017	-0.072432844742948	-0.0863936237991244	0.055160050164165	4	-0.0393751947603023	0.064419254117573	0.0322096270587865	0.267369358454263	0.465371168905396	-0.126196792569205	0.00181814143897935	-0.14388243631264	0.122665548389469	4	-0.0363988847633491	0.124336121174199	0.0621680605870993	0.579556204515674	0.761605285424136	-0.0381912165041076	-0.0770928681874745	-0.141176062960694	-0.167650698475526	4	-0.106027711531951	0.0590813403849261	0.0295406701924631	0.0115147946090759
K7ER00	-0.0606379433276823	-0.040252167483398	0.0734097972254929	-0.0483765370920018	4	-0.0189642126693973	0.0621501391233198	0.0310750695616599	0.564066476286607	0.726003067920681	-0.108059745857453	-0.0708834861565099	0.0510057796232557	-0.0205763614432403	4	-0.0371284534584869	0.0688289310896233	0.0344144655448116	0.322098933867555	0.57683950064077	-0.0210909400878366	-0.0267379707057507	0.0668808067063838	-0.0588936890535684	4	-0.009960448285193	0.0538653061723325	0.0269326530861662	0.724213177776611	0.839454155068519	0.00851867956812349	-0.0480942882010451	0.0324214776923775	-0.0299750594454899	4	-0.00928229759650849	0.0364720928427336	0.0182360464213668	0.628917709584494	0.794964512757644	-0.117747391044763	-0.0670492022763258	0.0913617421052143	-0.0703192958513421	4	-0.0409385367668041	0.0911920313456542	0.0455960156728271	0.403851142888678
K7ER96	0.0412416706915315	0.0654780712405101	0.0450651715315313	0.0707857271357901	4	0.0556426601498407	0.0146665100587723	0.00733325502938616	0.000272571529995433	0.00496375744082044	0.11644496727784	0.00657265392348619	0.0388053260177287	0.0357005693147287	4	0.049380879133446	0.0470075499776549	0.0235037749888275	0.0803691064418293	0.283526674798053	0.110329531610255	0.0731724775039512	0.0471400876567823	0.0336375967002875	4	0.0660699233678189	0.0337616828675491	0.0168808414337746	0.00785700397538013	0.0476942229268557	0.0539052134853727	0.0483030438014674	0.041820175694627	0.0536379636020732	4	0.0494165991458851	0.00568369689892434	0.00284184844946217	2.31881797378465e-06	0.000304773336293522	0.0694916642468265	0.0417031798676566	0.0379224831437538	0.0304903672217217	4	0.0449019236199896	0.0170420348244175	0.00852101741220876	0.00188403079016985
K7ERN2	0.112879544780188	0.273745497599317	0.101208249569065	-0.057011761920014	4	0.107705382507139	0.135117285076956	0.0675586425384779	0.161989756315697	0.336445553534831	0.175380870638178	0.103263853127363	0.13507004441173	-0.0642732138784498	4	0.0873603885747054	0.105308255612547	0.0526541278062735	0.148159191650053	0.390824813576012	0.311722428209422	0.306168056956362	0.194996311213361	0.0205683021221378	4	0.208363774625321	0.136252850103245	0.0681264250516225	0.022268162594543	0.0931074073627989	0.248312900127028	0.148542299439426	0.231182669647721	-0.270548459491101	4	0.0893723524307687	0.243869047683837	0.121934523841918	0.491218231854424	0.70282457491401	0.0372062321051075	0.158811482866521	0.248111354799793	-0.10003600129683	4	0.0860232671186478	0.151186228198543	0.0755931140992715	0.298521205481699
K7ERP4	0.271109212590126	0.369993912443146	0.0734097972254929	0.375855990386976	4	0.272592228161435	0.14121653918554	0.0706082695927699	0.00835621245151446	0.0480988113360024	0.206450877467427	0.462422901153848	0.00314312769398013	0.288220219391619	4	0.240059281426718	0.190633893488729	0.0953169467443644	0.0453766719506975	0.201037474534872	0.151305007143369	0.480055420243701	0.0943923702749549	0.231873474347333	4	0.23940656800234	0.17005844108561	0.085029220542805	0.0305311524852406	0.112418604096081	0.278814988524372	0.478653598574815	0.130825181753372	0.276245279560336	4	0.291134762103224	0.142870511413931	0.0714352557069653	0.00653511480111635	0.0506555180609609	0.385421018512746	0.453089545149042	0.118966203499816	0.363348022267343	4	0.330206197357237	0.14591059957272	0.07295529978636	0.00399145043536657
M0QWZ7	0.00673214026492217	-0.0543523645282518	0.0190699629985867	0.121958379125305	4	0.0233520294651406	0.0731567765132631	0.0365783882566316	0.546785825457979	0.711857687493312	-0.0994539552897755	-0.0333200732000265	0.00784501683428361	0.0615315023223722	4	-0.0158493773332865	0.0679317685146954	0.0339658842573477	0.657229058356036	0.821371012331073	-0.0799424752738251	-0.013307043221517	-0.0206841541717378	0.0735566069700811	4	-0.0100942664242497	0.063242149859045	0.0316210749295225	0.760376861299834	0.859296916526878	0.00851867956812349	0.0198746354749502	0.015347964333436	0.0339473319233375	4	0.0194221528249618	0.0107497334744557	0.00537486673722785	0.011183743132808	0.0701863352281567	-0.00419388388619102	-0.0233918483542284	0.0156344159419692	-0.0325806540637962	4	-0.0111329925905616	0.0214081535593594	0.0107040767796797	0.338391747053491
M0QXN5	0.351581791303682	0.108686251328821	0.0621386848904728	0.0525523717587789	4	0.143739774820439	0.140713578686027	0.0703567893430136	0.0870804485137195	0.224419604311146	0.407869169710133	0.284557401223251	0.261197747354177	0.63338308755259	4	0.396751851460038	0.170372578450524	0.0851862892252622	0.0034765421273494	0.042038347403909	0.314931984685312	0.107388192841864	0.179968101981029	0.499101764067318	4	0.275347510893881	0.172182519964146	0.0860912599820731	0.0186394937563724	0.0836011715512072	-0.105038649228301	0.0933367974159712	-0.146015023605452	0.181673960121393	4	0.00598927117590258	0.156978984805177	0.0784894924025887	0.941655924328539	0.968615354041551	0.210075741286181	-0.0206200991041747	0.0328095597501013	0.208317236124725	4	0.107645609514208	0.119274521798668	0.059637260899334	0.121109851481758
M0QZM1	-0.0578256714022956	-0.0842875710700256	-0.308333261954927	-0.351062304259947	4	-0.200377202171799	0.150729616874376	0.0753648084371879	0.0375860325045182	0.133673619130775	-0.201004749925027	0.0277293055200495	-0.683430988232212	-0.674932197582071	4	-0.382909657554815	0.354637837561591	0.177318918780796	0.0741340758269265	0.270334512937031	-0.288177862746103	-0.091123892132528	-0.541969282952846	-0.421463768438277	4	-0.335683701567438	0.193199608413026	0.0965998042065128	0.0132229835124678	0.0677509816240511	0.0456511122727162	0.206450877467426	-0.364500106483108	-0.287599551430326	4	-0.0999994170433228	0.270973728635521	0.13548686431776	0.488320494393272	0.702280140128859	0.297857986627907	-0.00410050974546824	-0.361323044091498	-0.524612844806324	4	-0.148044603003846	0.368257317461251	0.184128658730625	0.452051521137232
M0QZR8	0.259881957166872	0.159550333974663	0.0578892118891147	0.223241714962487	4	0.175140804498284	0.0884792994314126	0.0442396497157063	0.00746106138323742	0.0446629476465876	0.273294627165102	0.275061489849388	-0.512102996267107	0.196568645878494	4	0.0582054416564695	0.381962473728346	0.190981236864173	0.770835867302367	0.885684844870792	0.352899834884333	0.37672742374723	0.362760220411789	-0.0853373573479384	4	0.251762530423854	0.224945771565258	0.112472885782629	0.0664905858747712	0.192388588744359	0.153832764002132	0.153457789853542	-0.555372613811941	0.109700652982138	4	-0.0345953517435322	0.347802354091731	0.173901177045866	0.84888218932891	0.929696180738169	0.0574691359976134	0.0731814113408246	-0.306293678945393	0.0697221856640694	4	-0.0264802364857214	0.186664056347642	0.0933320281738209	0.786160348662396
M0R0F0	0.127778421159527	0.163985987094916	0.0564699348037807	0.166087516383484	4	0.128580464860427	0.0511888716350172	0.0255944358175086	0.00239508284278788	0.0205108652514101	0.0941101342820975	0.0277293055200495	0.109048787164056	0.267480310864986	4	0.124592134457797	0.10160411173865	0.0508020558693252	0.0496219088994671	0.211575501555838	0.258540802834914	0.163656412488609	0.0975948023132988	0.271640196401471	4	0.197858053509573	0.0823583075436772	0.0411791537718386	0.00298602277097318	0.0259389276915285	0.119415166944771	0.0588209157154668	0.107741568640331	0.187169947876245	4	0.118286899794203	0.0528947211336924	0.0264473605668462	0.00422593736373169	0.0384789417185569	0.202816882999687	0.190254530517402	0.0897213837239588	0.209529075793533	4	0.173080468258645	0.0561439837733074	0.0280719918866537	0.000835743813301576
M0R0P8	-0.0135592637281541	-0.00372629145828404	-0.0480442328599503	0.00474961759321813	4	-0.0151450426132926	0.0231736689386241	0.0115868344693121	0.239037533866833	0.425816420082166	-0.064338368428135	-0.0553982386590912	-0.0366469024117367	-0.0528166984434482	4	-0.0523000519856028	0.0115442314393893	0.00577211571969464	0.000101348502618339	0.00548635651545218	0.00199267302520478	-0.0482626776183302	-0.0809529069516104	-0.0588936890535684	4	-0.0465291501495761	0.0350962927594144	0.0175481463797072	0.0379517751831074	0.13156905547997	0.0133640075176957	-0.0312642135168508	-0.0895135808151015	-0.00782799012702305	4	-0.0288104442353199	0.0443840794857226	0.0221920397428613	0.241873161027095	0.480823653779979	-0.0403428873591564	-0.0814187935902646	-0.0882271830117352	-0.0762138701021955	4	-0.0715506835158379	0.0213787829554899	0.010689391477745	0.000539308934693859
M0R165	-0.0550188708265221	-0.0842875710700256	-0.0178296198129425	-0.00954640400318629	4	-0.0416706164281691	0.0346156942342722	0.0173078471171361	0.0527449731708726	0.16616738023874	0.0361539994820345	0.0785224958025011	0.0265008161146076	-0.100883357012661	4	0.0100734885966205	0.0773449811180619	0.038672490559031	0.803201010251473	0.90263072639041	-0.0590183225503321	0.00220595614980756	0.058688308593276	-0.125127387453655	4	-0.0308128613152259	0.0791443398818076	0.0395721699409038	0.465775659020938	0.655276519856561	-0.0283494691710606	0.0518175279777043	-0.0116190832668334	-0.0885366746016575	4	-0.0191719247654618	0.0577126319408855	0.0288563159704428	0.531128127466361	0.730031718682793	-0.0952048223936747	-0.0656200837435258	0.0104417467216468	-0.139606067295582	4	-0.0724973066777839	0.063101504989251	0.0315507524946255	0.0612850560796998
M0R2A0	NA	NA	NA	NA	0	NA	NA	NA	NA	NA	NA	NA	NA	NA	0	NA	NA	NA	NA	NA	NA	NA	NA	NA	0	NA	NA	NA	NA	NA	NA	NA	NA	NA	0	NA	NA	NA	NA	NA	NA	NA	NA	NA	0	NA	NA	NA	NA
O00115	0.0633673327628243	0.0160369633631459	0.200927460432216	-0.50627157550002	4	-0.0564849547354585	0.309942551195395	0.154971275597698	0.727995892085861	0.840615577454376	-0.0126401807787703	-0.265012055274236	0.418965340095727	-0.253635707831544	4	-0.028080650947206	0.319947964659389	0.159973982329694	0.866435287886742	0.935440669743436	0.050935461416135	0.237607720719352	0.205423682663699	-0.19624308695101	4	0.0744309444620439	0.197991773209773	0.0989958866048865	0.480578708876522	0.66802379074853	-0.0598093952353037	-0.486518812872096	0.186120861798326	-0.635003183220752	4	-0.248802632382456	0.378830101502053	0.189415050751026	0.236994164312522	0.476035454296847	-0.0147322436801186	-0.0275594825694574	0.319830645948663	-0.346650524298594	4	-0.0172779011498767	0.272176835100023	0.136088417550012	0.903119343585116
O00116	-0.063455707975162	-0.0212440527163137	-0.0572334043146108	-0.10098062113069	4	-0.0607284465341941	0.0326542911421879	0.016327145571094	0.00985845985203481	0.0531182506286313	-0.0242281550539822	0.0405962362123652	-0.119678734887869	-0.102569733640548	4	-0.0514700968425085	0.074121351533538	0.037060675766769	0.214249361667358	0.473272979648036	-0.03226286881248	0.00660777509745369	-0.0224212947077952	-0.102709921346058	4	-0.0376965774422199	0.0463769698291725	0.0231884849145862	0.155147273696003	0.329824337822094	-0.0408512375314191	-0.0331245555423786	-0.0590544260645854	-0.125530882083859	4	-0.0646402753055605	0.042023908337926	0.021011954168963	0.0217642207248426	0.105293507989622	-0.0974432945896742	-0.0814187935902646	-0.0389462802405166	-0.106053507584555	4	-0.0809654690012526	0.0298146839849823	0.0149073419924912	0.00161559860869708
O00139	-0.249868832206043	-0.0288172724211145	0.443910637307789	-0.106092034948289	4	0.0147831244330856	0.300390234650565	0.150195117325283	0.924799801504203	0.958077381750242	-0.448603518912162	-0.0691546722397589	0.397626815730024	-0.164630701772799	4	-0.071190519298674	0.351646355625794	0.175823177812897	0.69959245494316	0.845631794400827	0.105704022547312	-0.0244907817141928	0.31953016835022	-0.149539053493569	4	0.0628010889224427	0.20038187600841	0.100190938004205	0.5538669756142	0.721698218655917	0.303749847740359	0.04654258593703	0.38384287767525	-0.118733719730095	4	0.153850397905636	0.231792618165512	0.115896309082756	0.232621391141345	0.473254767480272	-1.15689714479992	-0.0331351225176235	0.595404247442803	-0.188249659655393	4	-0.195719419882533	0.724851416256495	0.362425708128247	0.608623057186764
O00148	0.0240900873068186	0.0184884423572422	-0.0373969886604418	0.0865530429941067	4	0.0229336459994314	0.0506896121651078	0.0253448060825539	0.400409576507121	0.579144808401503	-0.00343635344893051	0.00984778595634717	-0.0993109371939075	-0.00946032924906628	4	-0.0255899584838893	0.0498048310517239	0.0249024155258619	0.343765625589494	0.597232118885592	-0.0110091727086734	-0.0211265476808161	-0.0773371280141054	0.0889417701762526	4	-0.00513276955683558	0.0691708547942468	0.0345854273971234	0.886882564002319	0.936119410258034	0.0967664279995706	0.0430152124417048	0.0248581836159087	0.0936947949618539	4	0.0645836547547595	0.0361778023051855	0.0180889011525928	0.011779254695165	0.072055155997532	-0.0929698180103663	0.00816622014842167	-0.0140409384776966	0.0643739124736267	4	-0.00861765596650362	0.0652026758026122	0.0326013379013061	0.800367583117438
O00151	0.0978251990578988	-0.040252167483398	0.0335695326937018	0.329283352372812	4	0.105106479160254	0.159744544390015	0.0798722721950076	0.23623659295022	0.422569952951784	-0.144269484039538	0.0753997780446009	0.0295867959883502	0.411497141573595	4	0.0930535578917521	0.232427930069409	0.116213965034705	0.453829884953499	0.684936466407602	0.134145990611233	-0.0425670719543273	0.00682933839011635	0.596262400458097	4	0.17366766437628	0.291399360486077	0.145699680243038	0.278280372465309	0.47664227851849	-0.0649072628749825	0.341802730362312	0.100563966567284	0.362570079384708	4	0.18500737835983	0.204695963894034	0.102347981947017	0.120670320124639	0.31598245890126	0.249359468936717	0.0176354199058264	-0.099410921504411	0.313499472816782	4	0.120270860038729	0.193903141161243	0.0969515705806216	0.261087770355835
O00154	-0.202511351337838	-0.0621018641331865	-0.0851574058770496	-0.0459187936681482	4	-0.0989223537540555	0.0709114002310169	0.0354557001155085	0.0315764101396581	0.119170396819209	-0.0417865264382867	-0.173016271193463	-0.123101500528658	-0.0495600491127441	4	-0.0968660868182881	0.0626066202249678	0.0313033101124839	0.021267002602981	0.127253512956934	-0.102244425349866	0.0867484267828277	-0.0224212947077952	-0.136468114335909	4	-0.0435963519026857	0.0991680478687588	0.0495840239343794	0.413093865772838	0.60797602542906	-0.0433646441617073	-0.318294100419623	-0.0936238258770136	-0.0524674198941356	4	-0.12693749758812	0.129431274520071	0.0647156372600354	0.0974968616596298	0.278786401979449	-0.0840642647884743	-0.192450105979008	-0.154722594798642	-0.094043489915138	4	-0.131320113870316	0.0513394390787141	0.0256697195393571	0.00218730615582542
O00159	-0.113678906135813	-0.56892553735801	-0.0328578290452742	0.041038383741738	4	-0.16860597219934	0.274257209679101	0.137128604839551	0.264891204024922	0.451899610478182	-0.162080760155999	-0.265012055274236	0.0062794224962812	0.26355816515735	4	-0.039313806944151	0.230811321325196	0.115405660662598	0.744972596544669	0.869307908183137	-0.120554350619833	-0.304919513681407	0.0119302100829818	0.420575682820274	4	0.00175800715050384	0.307962732492572	0.153981366246286	0.991260891967283	0.996237521585604	-0.0134889596763172	-0.182028410328542	0.0436925900273976	0.527629325655205	4	0.0939511364194357	0.304582105940002	0.152291052970001	0.559954374381637	0.749996488150505	-0.0598537111965994	-0.373334319411187	0.0242475462466773	0.0180948204491848	4	-0.0977114159779812	0.187693245812243	0.0938466229061215	0.337915644733141
O00160	0.0978251990578988	0.0913250906673832	0.12712970885604	0.105470256336736	4	0.105437563729515	0.0155741262014903	0.00778706310074515	1.00657648665489e-05	0.000553251039846861	-0.0184225333727763	0.0612632954568963	0.07808531367954	0.0402927059480332	4	0.0403046954279233	0.0420932519413988	0.0210466259706994	0.103981738929943	0.327821968696059	0.063393217689348	0.110458846801831	0.0782727049116779	0.0480215148629435	4	0.0750365710664501	0.0266495223226751	0.0133247611613376	0.00134166229006525	0.0150400430910417	0.123902557937085	0.0984436878490599	0.0987639725210735	0.153875507777821	4	0.11874643152126	0.026281411089516	0.013140705544758	0.000102894027893766	0.00336556024282897	0.0372062321051075	0.082234659593711	0.0781863533574811	0.109214479318511	4	0.0767104310937027	0.0297197484050601	0.0148598742025301	0.002090131567619
O00161	-0.0790525630261804	0.0148096599791437	-0.152495396824981	-0.0312596154786036	4	-0.0619994788376554	0.0714723766169402	0.0357361883084701	0.133444026658798	0.293858157463784	0.0417221076709188	-0.0115746927867733	-0.344922896707884	0.207498206036754	4	-0.0268193189467461	0.23167859524808	0.11583929762404	0.824603171097556	0.914663173749648	-0.062137664394511	0.0240819634807413	-0.110210082800103	0.377942400503836	4	0.057419154197491	0.220786407851479	0.11039320392574	0.621596619821438	0.770433202837314	-0.019662246977036	0.0779067568463652	-0.291865890068907	0.263294608745652	4	0.00741830713651857	0.231477637779303	0.115738818889652	0.950976459677217	0.972860181930365	-0.0840642647884743	0.0976235526071375	-0.182203331220749	0.190016419381781	4	0.00534309399492389	0.169102786855531	0.0845513934277657	0.951665121011146
O00170	0.0723801825004357	-0.0112078728277361	-0.141051863413367	0.096598929131189	4	0.00417984384763044	0.107271624293088	0.0536358121465441	0.9404175453473	0.967954350421968	0.210411607589671	0.151508935179938	-0.0078879094303127	0.078002512001273	4	0.108008786335142	0.0943592803052183	0.0471796401526091	0.0620027621118651	0.242790608632342	0.0870522431590466	-0.0011042442490023	-0.0522772788670546	0.214124805352847	4	0.0619488813489593	0.116634761750763	0.0583173808753817	0.328986605634416	0.52928499671785	0.11491377470983	0.100141975321086	-0.182759804879585	0.0108883161427362	4	0.0107960653235167	0.136975755082715	0.0684878775413577	0.879915845172103	0.944261838819761	0.152840409220666	-0.0656200837435258	-0.075288127304237	0.151442714707809	4	0.0408437282201779	0.12857752977951	0.0642887648897552	0.54866944389219
O00178	-0.0876315479149634	0.0619173247824636	-0.0898644085545772	-0.0731870374687384	4	-0.0471914172889539	0.0731137885161283	0.0365568942580642	0.244242356266268	0.430772837218744	0.0951815751340834	0.113956189297086	-0.0158191830665319	-0.225801499634819	4	-0.00812072956754539	0.156011029652294	0.0780055148261471	0.920479070836579	0.958528498497753	0.125032283481734	0.0402739969833272	-0.0487325718236424	-0.204744555517023	4	-0.0220427117189012	0.140957131493218	0.0704785657466091	0.765050158997447	0.860717019221914	0.100186488963277	0.12371044645949	-0.02529402016391	-0.036365745602519	4	0.0405592924140845	0.0831136515837395	0.0415568257918697	0.366759190754007	0.60414752946864	-0.0952048223936747	0.012232061376493	-0.133491916747517	-0.119685373172322	4	-0.0840375127342551	0.0661035746250105	0.0330517873125053	0.043926553699448
O00182	0.129013076811166	0.211898753989085	0.129831385752105	0.303494670937906	4	0.193559471872566	0.0829650194119676	0.0414825097059838	0.00344557095758077	0.0270013045641589	0.188491786129117	0.275061489849388	0.117774791835957	0.262248410150561	4	0.210894119491256	0.0728646880888163	0.0364323440444081	0.00116323347783551	0.0217749604054917	0.192021802760589	0.194851034092204	0.155592526711692	0.184483757412215	4	0.181737280244175	0.0179706540178347	0.00898532700891733	9.48944984520238e-07	0.000136602889914508	0.204496667834539	0.18740512177688	0.146592497611688	0.198099508034504	4	0.184148448814403	0.0260111351807861	0.0130055675903931	7.75248803497435e-06	0.000746070276788707	0.202816882999687	0.135392595482884	0.19569840191995	0.225191054689121	4	0.18977473377291	0.0383706496035942	0.0191853248017971	6.16296021326573e-05
O00186	-0.110761422753519	-0.116201020716697	-0.0789051965647107	-0.071936326475028	4	-0.0944509916274884	0.0222686313002519	0.011134315650126	0.000146775475637789	0.00322228982764133	-0.0811840398660582	0.0228744662525867	-0.163058281954046	-0.089133594234853	4	-0.0776253624505926	0.0764724414151911	0.0382362207075956	0.0886450529725158	0.300082861294418	-0.0497005611562883	-0.0222470875747314	-0.0809529069516104	-0.0775093672209154	4	-0.0576024807258864	0.0274102820890633	0.0137051410445317	0.00566703349771668	0.0389350960536307	-0.0246199667730036	-0.0939586551653823	-0.106025292276767	-0.10020498232696	4	-0.0812022241355281	0.0380419413791541	0.019020970689577	0.00526833951195034	0.0440036423016882	-0.110947558939422	-0.0988533869262853	-0.0515620574289735	-0.104546776334401	4	-0.0914774449072703	0.0270649554626618	0.0135324777313309	0.000511468363316279
O00193	-0.131308800157604	-0.00124102806868964	0.02198155841849	-0.295996603535833	4	-0.101641218335909	0.146078712007739	0.0730393560038693	0.213445950010177	0.397319647094068	-0.162080760155999	-0.216366346332509	-0.297746103339817	-0.20753929324209	4	-0.220933125767604	0.056462626830266	0.028231313415133	0.000229852981143758	0.00807959955811141	-0.0778363507524988	-0.158518065294218	-0.162882766270154	-0.272833545359193	4	-0.168017681919016	0.0800742317986127	0.0400371158993063	0.00570762066795147	0.0390276365777267	-0.132872857425027	0.0377079285622684	0.00192744857111438	-0.156520749920307	4	-0.0624395575529878	0.0965828675986012	0.0482914337993006	0.243571069000179	0.482829732188551	-0.12229848327595	-0.117981699300341	-0.176270375467008	-0.260235772481121	4	-0.169196582631105	0.0662333466650101	0.0331166733325051	0.00220162863489086
O00203	-0.039678324692036	-0.0685917313115085	-0.0358823480584434	-0.0756917169882799	4	-0.0549610302625669	0.0201089912510693	0.0100544956255347	0.00156329975215313	0.0152446940347062	0.029443777892482	0	-0.0078879094303127	-0.00472241024240316	4	0.00420836455494153	0.0171329604500704	0.00856648022503519	0.640693935474411	0.813789468045413	-0.0673516022736738	-0.0574226769038061	0.00512503217786747	-0.0666210510781792	4	-0.0465675745194479	0.0347566615519877	0.0173783307759938	0.0365539596626043	0.128342183577297	-0.0122574657552846	-0.0183085584129378	-0.0292250717538248	-0.0283818013698225	4	-0.0220432243229674	0.00819482136684598	0.00409741068342299	0.001695986158628	0.0207569480062043	0.0207884726711451	-0.00958604882919789	0.00174554775182933	-0.110583166065069	4	-0.0244087986178232	0.05880073322168	0.02940036661084	0.438192829318697
O00217	-0.100596443322295	-0.0543523645282518	0.0450651715315313	-0.0143433994148762	4	-0.0310567589334728	0.0617854827313591	0.0308927413656796	0.353554530057571	0.539250930557032	-0.0655351292108957	0.0628408735702314	0.0555544803148874	-0.0577154978562874	4	-0.00121381829551606	0.0698935240400158	0.0349467620200079	0.973419048508485	0.98341021487989	0.00795423126392159	-0.00552969262979758	0.0170131103762079	-0.0238714036188422	4	-0.00110843865212758	0.0177784756189854	0.00888923780949268	0.90483826354059	0.944350532488241	-0.163987036582985	-0.209112289531166	-0.0331668639351994	0.09515723304034	4	-0.0777772392522526	0.137328610615337	0.0686643053076685	0.300558857976302	0.543742985543292	-0.255932664058809	-0.103245156043443	-0.108797389494488	-0.0455326167333202	4	-0.128376956582515	0.089719210132719	0.0448596050663595	0.0287357691758112
O00221	0.497330952806193	0.0511820496441056	0.101208249569065	NA	3	0.216573750673121	0.244426083063829	0.141119464853867	0.126068760039642	0.284195273377955	0.437739699292271	-0.0282727384627099	0.157812506150274	NA	3	0.189093155659945	0.234575696334669	0.135432341424165	0.156028053994351	0.399722717987224	0.328493497702391	0.123690005170965	0.0354986812213863	NA	3	0.162560728031581	0.150315303422388	0.0867845808942359	0.0753237560936637	0.207813464213644	0.437743272338725	0.00363399446773927	0.224595009612962	NA	3	0.221990758806475	0.21706635592628	0.125323319026049	0.0878209298315698	0.262334655020588	0.717571973116224	-0.238404739325079	0.275786313242642	NA	3	0.251651182344596	0.478445134879769	0.276230427415301	0.325885100946269
O00231	0	-0.0492090612522922	-0.00295634333141221	0.0282659498558595	4	-0.00597486368196122	0.0320751181468695	0.0160375590734348	0.72228558846155	0.835824336365229	-0.104365262299711	-0.0953069600957274	0.00940891405071986	0.0615315023223722	4	-0.0321829515055867	0.0810497966042981	0.040524898302149	0.457357403571152	0.686337103783464	-0.0424947914234362	-0.0448426166546237	0.0170131103762079	0.0437213774293178	4	-0.00665073006813354	0.0441238540693054	0.0220619270346527	0.773240578755686	0.865591347830569	-0.0320886376768537	-0.0387200184358981	-0.0390998196889404	0.00778574496659536	4	-0.0255306827087742	0.0224430477856046	0.0112215238928023	0.0632189094984055	0.210011827927121	0.0125089949065784	-0.00410050974546824	-0.0389462802405166	0.0522673096169733	4	0.00543237863439171	0.0378766884437966	0.0189383442218983	0.783878669781568
O00232	-0.0508188822972364	-0.0364304565309897	0.026337963462626	-0.0179516423317247	4	-0.0197157544243312	0.033520356266401	0.0167601781332005	0.284010040490132	0.470256102863913	-0.0207419792757346	-0.0657032470508297	0.0388053260177287	-0.00629998835573825	4	-0.0134849721661435	0.0430709169495897	0.0215354584747948	0.554258670925961	0.76264176705015	0.00298797837057208	-0.0840863413925939	0.028804028647378	-0.0133790298011999	4	-0.0164183410439609	0.0483386099570243	0.0241693049785121	0.522272320336704	0.702951569179811	-0.0919706700158225	-0.0997955951876664	-0.02529402016391	-0.0935258266893327	4	-0.0776465280141829	0.0350651746769076	0.0175325873384538	0.00442930040057131	0.0394978616841507	-0.0907382707117836	-0.0770928681874745	0.0139056020252182	-0.05860191131147	4	-0.0531318620463775	0.0465915400622482	0.0232957700311241	0.062735009907679
O00267	-0.131308800157604	-0.0504931690726172	-0.110440769997817	-0.0410158321407476	4	-0.0833146428421967	0.04436854906366	0.02218427453183	0.00944760333123444	0.0522122575325808	-0.104365262299711	0.0501716809273491	-0.0959440860955089	-0.00157241981875358	4	-0.0379275218216561	0.0749734576514099	0.037486728825705	0.350700801167898	0.598797230290933	-0.0704890338274334	-0.0166530711015082	-0.117618032534372	-0.0743900253767366	4	-0.0697875407100126	0.0413630381155222	0.0206815190577611	0.014961052378083	0.0730921247367725	-0.0610821743570167	0.0162813707509418	-0.103950964038908	0.0400346618022525	4	-0.0271792764606827	0.0669572994582988	0.0334786497291494	0.447886099793003	0.669945413000617	-0.0885101698196664	-0.0528213252168692	-0.120142363088497	-0.0211646099980423	4	-0.0706596170307689	0.0429540249114886	0.0214770124557443	0.0166135710564611
O00273	0.0227622500838711	-0.139241262114765	-0.228311178523722	-0.32252289804602	4	-0.166828272150159	0.146886093683346	0.0734430468416728	0.0635338873617576	0.18737847950692	0.180437640767597	0.0325678624564307	0.00471212734932085	-0.376783938604409	4	-0.0397665770077652	0.237543838633003	0.118771919316502	0.749159826533112	0.870707480049826	0.0217694740245553	-0.0597217929933942	-0.0576107231700951	-0.342418620675146	4	-0.10949541570352	0.159846932539181	0.0799234662695903	0.219737949325298	0.413874031657554	0.110398293587337	-0.186162209835555	-0.0311946216035943	-0.314530640877461	4	-0.105372294682319	0.184692084399198	0.0923460421995992	0.297332949428053	0.540166770505411	0.160354462877973	-0.0443514669898747	-0.0734491276404559	-0.218894977100221	4	-0.0440852772131448	0.15622243231159	0.078111216155795	0.592943662377465
O00299	-0.0300004107896822	-0.0428056107002176	0.0464957071379719	-0.0656989841140385	4	-0.0230023246164916	0.0486282650996146	0.0243141325498073	0.38064842598351	0.563739988930164	-0.12417941122073	-0.247310053540777	0.0510057796232557	0.0156306517137642	4	-0.0762132583561218	0.136863499619651	0.0684317498098254	0.308018471408892	0.567598607044283	-0.0642209788950001	-0.0770829536548315	0.0734014733589817	0.00295634333141221	4	-0.0162365289648594	0.0693015936330485	0.0346507968165242	0.655912463498163	0.795164364626311	-0.0572672006728504	-0.133325218752861	0.0076943917900007	-0.0589587471149937	4	-0.0604641936876761	0.0576391327762291	0.0288195663881145	0.0806976635295305	0.246662322396128	-0.115477217419936	-0.0233918483542284	0.0748736193166454	-0.0070204276777725	4	-0.0177539685338229	0.0780527556464883	0.0390263778232441	0.665161454477365
O00303	0.0227622500838711	0.0439805619410053	0.0421998378371419	0.0106647346982192	4	0.0299018461400594	0.0160259282295559	0.00801296411477796	0.00971733953644898	0.0529288602138473	0.0615912134070218	0.0196288067489326	0.00940891405071986	-0.025366720158427	4	0.0163155535120618	0.0358049188097865	0.0179024594048933	0.397243056090745	0.637087730579058	0.0325322539845875	0.0338189748460279	0.0668808067063838	0.0249379017499022	4	0.0395424843217253	0.0186420634855948	0.00932103174279741	0.00542607071679768	0.0376215866442188	0.0456511122727162	0.0288188367259991	0.0286447869468938	-0.0093986980022496	4	0.0234290094858399	0.0232933095072102	0.0116466547536051	0.0909461982497523	0.266878838876886	0.128145881967637	0.0575281470293391	0.0598714559773987	-0.00842862207058074	4	0.0592792157259485	0.0557685275892562	0.0278842637946281	0.0776476656839897
O00330	-0.19785999306621	-0.0124585838214465	-0.167343161232295	0.0502569137711167	4	-0.0818512060872087	0.119770341916365	0.0598851709581826	0.220684859901656	0.405550353484928	-0.110528001448203	-0.104130810482734	-0.209600867891076	-0.082462160191973	4	-0.126680460003496	0.0565698408852693	0.0282849204426346	0.00419809537752417	0.0467950070906016	-0.0915814422869928	0.123690005170965	-0.0311385118089041	0.0234828385495152	4	0.0061132224061457	0.0913928199620132	0.0456964099810066	0.897951672918714	0.94037038814533	0.0597722205173689	0.0394791934144613	-0.238555429748229	-0.207892851641333	4	-0.086799216864433	0.158243525081908	0.0791217625409541	0.314691862690131	0.558938602181119	0.0514200913248084	-0.0627660866883728	-0.247054475570717	-0.12578557270874	4	-0.0960465109107553	0.124554944500666	0.0622774722503332	0.1739561569203
O00399	-0.134268175638148	-0.0738047271944245	-0.231775033827293	0.161841170298344	4	-0.0695016915903806	0.16739710363775	0.0836985518188751	0.438109046617829	0.615558568599783	0.0136641435731381	0.124569863321938	-0.0463620572449485	-0.085794020889721	4	0.00151948219010154	0.0916609308548616	0.0458304654274308	0.974626861984833	0.98341021487989	-0.192787517103383	-0.102929973081705	-0.138188239017125	-0.0374747054186629	4	-0.117845108655219	0.0650949832232765	0.0325474916116382	0.0110877077701474	0.0613416336509826	-0.0333371838741124	-0.182028410328542	-0.167516092816374	0.114035243246029	4	-0.0672116109432499	0.138132527508538	0.0690662637542688	0.368063170411515	0.60470378486631	-0.367664241016737	-0.172315548867306	-0.295535276809128	0.0167109402079275	4	-0.204701031621311	0.168206171584972	0.0841030857924862	0.0508897908356665
O00400	-0.216556086776115	-0.0829730424680197	-0.112035789553197	NA	3	-0.137188306265777	0.070253784626788	0.0405610414658661	0.00989747428854731	0.0531182506286313	-0.23695747903971	-0.104130810482734	-0.150779952175609	NA	3	-0.163956080566018	0.067386487811034	0.0389056068774439	0.00397725971501459	0.0453707778056193	-0.266428279355648	0.0584079257085615	-0.0719303944871619	NA	3	-0.0933169160447495	0.163470723704213	0.0943798663352504	0.290435709505706	0.489674930192833	-0.187423591819652	-0.149377624038227	-0.289506617194985	NA	3	-0.208769277684288	0.0724621446657183	0.0418360387288101	0.00189592864896696	0.0223011373767592	-0.16157363200939	-0.0627660866883728	-0.156668239113611	NA	3	-0.127002652603791	0.0556845402272473	0.0321494842899018	0.00523512075972215
O00410	-0.035522695200725	0.00742383305843797	-0.0680286073141049	0.0775642597668521	4	-0.00464080242238496	0.0629151089150693	0.0314575544575346	0.887549604087319	0.938790221538126	-0.0667328835685177	-0.0622600591613502	-0.0382615584738315	0.153416807463993	4	-0.00345942343492653	0.105328669638464	0.052664334819232	0.949760120629884	0.971944767997339	0.0286277995286713	0.0164630357122586	-0.0558307167248091	0.171403930368226	4	0.0401660122210866	0.0951029697668452	0.0475514848834226	0.430673573907435	0.623826647782547	-0.0559977812852845	-0.0405900057889442	-0.0772526426481207	0.100992205770431	4	-0.0182120559879797	0.0808784696691669	0.0404392348345835	0.668269160898791	0.824562315672264	-0.0576727658970735	0.0270428731615245	-0.0808192332774659	0.148918313292262	4	0.00936729681981176	0.103946929436094	0.0519734647180469	0.862903467088386
O00411	-1.18860202520511	-0.232350666506246	0.0845935357181687	NA	3	-0.445453051997731	0.662809327118523	0.382673143433274	0.222861856462422	0.40792085555935	-0.291923938257639	-0.0657032470508297	-0.180782031165077	NA	3	-0.179469738824515	0.11311605485479	0.0653075847200817	0.0218440007162761	0.128973465166607	-0.729011362902285	-0.296760990294243	-0.231548787119031	NA	3	-0.419107046771853	0.270358413458772	0.156091502788102	0.0237499557848511	0.0963706259565167	-0.503110746732869	-0.207010766885878	0.359996135720882	NA	3	-0.116708459299288	0.438582093457263	0.2532154897193	0.605419878530676	0.780462384988586	-0.71755373900494	-0.158539045914298	-0.078973174112093	NA	3	-0.31835531967711	0.3479974360312	0.200916413369913	0.116780073280113
[truncated: 2,828 more rows]
[truncated: 221 more columns]
