# Supplementary material for: The Emerging Plasticizer Alternative DINCH and Its Metabolite MINCH Induce Oxidative Stress and Enhance Inflammatory Responses in Human THP-1 Macrophages
Source: Cells. 2021 Sep 9;10(9):2367. doi: 10.3390/cells10092367 (PMC8466537; doi:10.3390/cells10092367)
Supplement: Supplementary file 1 [file cells-10-02367-s001.zip › Supplement 5.csv]

	16h_DINCH_10000nM_ctrlLPS_40	16h_DINCH_10000nM_ctrlLPS_48	16h_DINCH_10000nM_ctrlLPS_52	16h_DINCH_10000nM_ctrlLPS_60	16h_DINCH_10000nM_ctrlLPS_nCounts	16h_DINCH_10000nM_ctrlLPS_Mean	16h_DINCH_10000nM_ctrlLPS_SD	16h_DINCH_10000nM_ctrlLPS_SEM	16h_DINCH_10000nM_ctrlLPS_pvalue	16h_DINCH_10000nM_ctrlLPS_pvalue.adj	16h_DINCH_1000nM_ctrlLPS_35	16h_DINCH_1000nM_ctrlLPS_43	16h_DINCH_1000nM_ctrlLPS_51	16h_DINCH_1000nM_ctrlLPS_59	16h_DINCH_1000nM_ctrlLPS_nCounts	16h_DINCH_1000nM_ctrlLPS_Mean	16h_DINCH_1000nM_ctrlLPS_SD	16h_DINCH_1000nM_ctrlLPS_SEM	16h_DINCH_1000nM_ctrlLPS_pvalue	16h_DINCH_1000nM_ctrlLPS_pvalue.adj	16h_DINCH_100nM_ctrlLPS_34	16h_DINCH_100nM_ctrlLPS_42	16h_DINCH_100nM_ctrlLPS_50	16h_DINCH_100nM_ctrlLPS_58	16h_DINCH_100nM_ctrlLPS_nCounts	16h_DINCH_100nM_ctrlLPS_Mean	16h_DINCH_100nM_ctrlLPS_SD	16h_DINCH_100nM_ctrlLPS_SEM	16h_DINCH_100nM_ctrlLPS_pvalue	16h_DINCH_100nM_ctrlLPS_pvalue.adj	16h_DINCH_10nM_ctrlLPS_33	16h_DINCH_10nM_ctrlLPS_41	16h_DINCH_10nM_ctrlLPS_49	16h_DINCH_10nM_ctrlLPS_57	16h_DINCH_10nM_ctrlLPS_nCounts	16h_DINCH_10nM_ctrlLPS_Mean	16h_DINCH_10nM_ctrlLPS_SD	16h_DINCH_10nM_ctrlLPS_SEM	16h_DINCH_10nM_ctrlLPS_pvalue	16h_DINCH_10nM_ctrlLPS_pvalue.adj	16h_MINCH_10000nM_ctrlLPS_39	16h_MINCH_10000nM_ctrlLPS_47	16h_MINCH_10000nM_ctrlLPS_56	16h_MINCH_10000nM_ctrlLPS_64	16h_MINCH_10000nM_ctrlLPS_nCounts	16h_MINCH_10000nM_ctrlLPS_Mean	16h_MINCH_10000nM_ctrlLPS_SD	16h_MINCH_10000nM_ctrlLPS_SEM	16h_MINCH_10000nM_ctrlLPS_pvalue
A0A024R442	0.17984981445953	0.165007325552124	0.055639742223697	0.132483642725626	4	0.133245131240244	0.0553895590481428	0.0276947795240714	0.0029665962262715	0.0530652094202293	0.00851149985551747	-0.0576107231700952	0.0296454617485248	-0.0236066129523338	4	-0.0107650936295967	0.0381401698472028	0.0190700849236014	0.592873098866037	0.797624075442397	0.137028249477513	0.108586132816093	-0.0208677477125158	0.0758028240777623	4	0.0751373646647132	0.0687185713679371	0.0343592856839686	0.07138759460577	0.404128648863751	-0.0666862234315218	-0.0143711817764677	-0.066142356791212	0.0202723950262611	4	-0.0317318417432351	0.042472444013882	0.021236222006941	0.185734481107242	0.491659664086858	0.205799267057869	0.0525833315995681	0.0859233348016408	0.0435366482836487	4	0.0969606454356817	0.0748134061909124	0.0374067030954562	0.0410977139672106
A0A024R4E5	-0.0563379841498122	-0.0608160011845971	-0.0294279722991986	0.0113598621645478	4	-0.033805523867265	0.0331479144865779	0.0165739572432889	0.0874834868109293	0.344506924218239	-0.0225845803702927	-0.0429909338973191	-0.0404993622797528	-0.0236066129523338	4	-0.0324203723749246	0.0108233083096733	0.00541165415483665	0.000972294254180956	0.0386742832945925	-0.00392570321380026	-0.00212943956134715	-0.0113449735940093	0.0319151800767623	4	0.00362876592690139	0.0192748630357455	0.00963743151787273	0.719480077395039	0.911516646164405	-0.0573028079728853	-0.046829132147511	-0.0136749368970766	0.0468666050379743	4	-0.0177350679948746	0.0469110201660534	0.0234555100830267	0.478205416093313	0.745590930415771	0.00354906708107061	-0.0411521066663015	-0.0408144628334816	0.00705475753395046	4	-0.0178406862211905	0.0267614237357754	0.0133807118678877	0.23081547392286
A0A024R4M0	-0.11629600009849	-0.0668397888123671	0.036334219426906	-0.0463556356917396	4	-0.0482893012939228	0.0635974606183737	0.0317987303091868	0.179666950111709	0.488868758044732	-0.0488360104867513	0.0115058255995894	-0.0839311502800862	-0.089152377736782	4	-0.0526034282260075	0.0463373202431029	0.0231686601215515	0.0636278458613876	0.283876584154773	0.0194698641982248	0.0211232915657539	-0.0401039665754332	0.0300572338561799	4	0.00763660576118133	0.0321650095104959	0.016082504755248	0.651691747293768	0.875676474726824	-0.0158167054627749	0.0360888702678787	-0.0714955912854187	-0.0379224831437538	4	-0.0222864774060172	0.0451499750065351	0.0225749875032676	0.361657724799243	0.660598974059283	-0.050626073069968	0.00809141235354779	-0.0870856167637113	-0.0321804057491497	4	-0.0404501708073203	0.0395941414702194	0.0197970707351097	0.0870529549702069
A0A024RCR6	0.132471836662255	0.132079522907354	0.155372088808914	0.213403638109193	4	0.158331771621929	0.0382952869138193	0.0191476434569096	0.000169276723280834	0.0110915627955463	0.114820402001858	0.0504490226873575	0.0745828667623871	0.109229069754758	4	0.0872703403015903	0.0303203623249139	0.015160181162457	0.00119733188870133	0.0424571476898328	0.0155968550510185	-0.0630667951372054	-0.0556797728298875	0.106101424610801	4	0.000737927923681651	0.0786897998318034	0.0393448999159017	0.985644396890265	0.998439756181397	0.00448739099231388	0.00792256269330702	0.079434467494405	0.10180228052286	4	0.0484116754257214	0.0496040366409172	0.0248020183204586	0.0987949754227849	0.373788749315493	0.0769735188988228	0.124313246585311	0.20765764879742	0.199479895687691	4	0.152106077492311	0.0625768821411034	0.0312884410705517	0.00281880253911082
A0A075B797	-0.222597073445578	-0.0809938831222274	NA	-0.0152869779011945	3	-0.106292644823	0.105945219034885	0.0611675007291445	0.0924152891027237	0.354982743275138	-0.0699625581675674	0.115872097685406	NA	0.0460850867625645	3	0.0306648754268011	0.0938720779424211	0.0541970694694464	0.528885359278431	0.763416165778177	-0.125530882083859	0.126239997379968	NA	0.211504105193712	3	0.0707377401632736	0.175238469176745	0.101173977351572	0.441433635943857	0.768252090649557	-0.0714009173035737	0.0576220318175199	NA	0.0890631686921818	3	0.0250947610687094	0.0850335123959261	0.0490941212719273	0.567937842985169	0.805674830921885	-0.252766070379967	-0.312223831565514	NA	0.00176692617418783	3	-0.187740991923764	0.166789521876119	0.0962959753531864	0.0671906127271928
A0A087WT44	0.112167740207166	-0.130604331341459	0.0122133642925727	0.191932107806369	4	0.046427220241162	0.139049447398381	0.0695247236991904	0.529108150738553	0.781687086188938	-0.00534530081988133	-0.107902877701161	-0.667131042301982	0.161696489648894	4	-0.154670682793533	0.359253441255372	0.179626720627686	0.422271803647546	0.688906389260521	0.206625105478131	-0.152476030686095	-0.032378673466206	0.0226014289371326	4	0.0110929575657406	0.149454410443281	0.0747272052216405	0.886854155678853	0.972635532493805	-0.0666862234315218	0.0110794458804898	0.069741071290561	0.126947928697037	4	0.0352705556091416	0.0828117378352661	0.041405868917633	0.426996645265673	0.703822714633658	0.372897217546603	-0.237618895561106	-0.15043895400798	0.105651787563863	4	0.0226227888853451	0.27523450072761	0.137617250363805	0.874822951552714
A0A087WT45	0.168969709794465	0.238493791040747	-0.0934160671710161	0.022630974499568	4	0.084169602040941	0.148695086418025	0.0743475432090124	0.30079478783202	0.615096560309905	0.108895568044753	0.228613310035588	-0.121452269231363	-0.0126632352657523	4	0.0508483433958063	0.151317640951817	0.0756588204759086	0.526554491534117	0.763081652346642	0.0911478880581951	0.162814612279122	-0.142408729346696	0.0319151800767623	4	0.0358672377668458	0.130345087367405	0.0651725436837024	0.601955581600813	0.847091500148405	0.312006426868169	-0.112302969624792	-0.100386570090407	-0.0240168811185356	4	0.0188250015086083	0.199329474906557	0.0996647374532783	0.856411377418385	0.937339461960818	-0.0992818790140846	0.423128911632392	-0.0491177665646911	-0.00354035770524858	4	0.0677972270870918	0.240093176691862	0.120046588345931	0.592709600864838
A0A087WTP2	NA	NA	NA	NA	0	NA	NA	NA	NA	NA	NA	NA	NA	NA	0	NA	NA	NA	NA	NA	NA	NA	NA	NA	0	NA	NA	NA	NA	NA	NA	NA	NA	NA	0	NA	NA	NA	NA	NA	NA	NA	NA	NA	0	NA	NA	NA	NA
A0A087WU02	0.0984711654269271	0.161576420151851	-0.325381815214265	NA	3	-0.0217780765451623	0.264815012591558	0.15289101880519	0.871487633625849	0.953150186849111	0.0667261138008129	0.0279650085359785	-0.191932107806369	NA	3	-0.0324136618231924	0.13949984507878	0.0805402731081445	0.65081153651611	0.82977784685289	0.0194698641982248	0.114494789706869	-0.0635311937911452	NA	3	0.0234778200379828	0.089080640335703	0.0514307316774024	0.608780038630477	0.853707989889948	-0.116976121493353	0.0453567503682719	-0.131730698418789	NA	3	-0.0677833565146235	0.0982595401178272	0.0567301719374763	0.212626121821195	0.525567265957051	0.141213704800785	0.104827199150979	-0.235530890795572	NA	3	0.00350333771873038	0.207807642423039	0.119977798292603	0.973509499128022
A0A087WUC6	-0.0640187212314359	0.0322934032068844	0.0378284661072364	0.0245009618526141	4	0.00765102748382477	0.0480915711682319	0.0240457855841159	0.761127599591235	0.906218485058804	-0.0291027919442606	-0.0324506492716952	-0.0370806520522884	0.0408420947745081	4	-0.014447999623434	0.0370049088042081	0.018502454402104	0.464563737897357	0.72204430831039	-0.017089070454562	0.0336503894419168	-0.0615643290817444	-0.0038015701598561	4	-0.0122011450635614	0.039300262196373	0.0196501310981865	0.557488223584352	0.834833988013849	-0.029513280243014	0.00475875651113575	-0.0732844260352317	0.035291912251201	4	-0.0156867593789772	0.0466387105476379	0.023319355273819	0.526187377904447	0.776345205328967	-0.0305248670134586	-0.00487672027475167	-0.134890127155474	-0.0430687218918858	4	-0.0533401090838925	0.0566425698802641	0.0283212849401321	0.108642756301546
A0A087WUQ6	0.107616647975979	-0.14327816137657	0.343536208536268	0.203533394085132	4	0.127852022305202	0.205075908793309	0.102537954396654	0.25890976365334	0.573815407275695	0.17843650129783	-0.00256935961213325	0.0231100256985786	0.0754407562984749	4	0.0686044809206875	0.0800942536293206	0.0400471268146603	0.137530325049243	0.427707143598777	-0.0861566437497146	-0.176322772640463	0.131326418514866	0.0954803088542285	4	-0.0089181722552708	0.146694319143787	0.0733471595718934	0.90719483984546	0.980540348867052	-0.0666862234315218	0	-0.064362350345926	0.0185938665752644	4	-0.0281136768005458	0.0438701915459959	0.0219350957729979	0.247254223023149	0.562802714898989	-0.059856399123507	-0.175819783322284	0.279042282034186	0.0874628412503395	4	0.0327072352096837	0.196410009542716	0.098205004771358	0.750425856142541
A0A087WUX8	0.0950266073857721	0.159857902925551	0.368689685764607	0.041222662726513	4	0.166199214700611	0.143442534001221	0.0717212670006103	0.0596697273515215	0.287231824496257	-0.00213574434399111	-0.0324506492716952	0.228796503550331	-0.00180224263398543	4	0.0481019668251648	0.121317073966842	0.0606585369834211	0.457981774914426	0.717346583194979	0.128685503976852	0.17794130436659	0.195232450519776	0.154658244789002	4	0.164129375913055	0.0288914116431149	0.0144457058215575	2.78481535056075e-05	0.00443078779197113	0.173416399960902	-0.0337581929898511	0.266432982295659	0.122266383082575	4	0.132089393087321	0.125642395699973	0.0628211978499866	0.0801861944642498	0.336946636484151	0.408805545567329	0.0987781544781735	0.359660742242471	0.0486738467356896	4	0.228979572255916	0.18154660807734	0.0907733040386698	0.045131804156484
A0A087WVM4	0.107616647975979	0.207219085707563	-0.0154135551697429	0.0759001143592584	4	0.0938305732182645	0.0918382483208224	0.0459191241604112	0.0870351790238397	0.34348217518155	-0.0280143761695966	-0.0496179324165646	-0.0473611827820118	0.0320612092322984	4	-0.0232330705339687	0.0381166848666448	0.0190583424333224	0.268572536729894	0.573372018739032	-0.0250451294463276	0.0887139861044784	-0.140331414314087	0.0207314415840865	4	-0.0139827790179625	0.0963293930857636	0.0481646965428818	0.781350312011405	0.931029559799163	0.0486099442246216	0.0252005541251426	-0.0554951125917036	0.0386084540356654	4	0.0142309599484315	0.0474630872928622	0.0237315436464311	0.570665841606958	0.807532094778178	-0.0378020327123845	0.31900404133194	-0.0913666140915875	0.0639765893467946	4	0.0634529959686907	0.182143078767487	0.0910715393837435	0.51204282223764
A0A087WVQ6	-0.0410981060895195	-0.0648290636912205	-0.0739198915452189	-0.0881758113863667	4	-0.0670057181780814	0.0197646218336779	0.00988231091683896	0.000503177855644943	0.0207117646865114	-0.00320480333391687	-0.062963957664302	-0.0251785629959968	-0.0644578504837531	4	-0.0389512936194922	0.0299704974609074	0.0149852487304537	0.0406999980334764	0.236611917080249	0	-0.019279062494883	-0.00944793842141167	-0.0191088229477046	4	-0.0119589559659998	0.00920192723212955	0.00460096361606478	0.0407043995731914	0.317957105709968	-0.0503050818480656	-0.0208046151392962	0.0252962946157558	0.0185938665752644	4	-0.00680488394908541	0.0354205302242385	0.0177102651121193	0.714053719285148	0.877502097934605	-0.0115951384786075	-0.0921360353851065	-0.134890127155474	-0.168599603975745	4	-0.101805226248733	0.0677924596382188	0.0338962298191094	0.0239019287355552
A0A087WW23	0.0134432530936414	-0.300003665064023	-0.0185161263458837	-0.0307376748768701	4	-0.0839535532982839	0.14523288797841	0.0726164439892049	0.291581684224764	0.60873717638913	-0.113167056732735	-0.0589471707329094	-0.010018755824991	0.0425918767244679	4	-0.0348852766415419	0.0666534945138669	0.0333267472569335	0.33553280492974	0.62767058743973	-0.119839770006003	-0.140698862909742	-0.0208677477125158	-0.0133495536590197	4	-0.0736889835718201	0.0659574326801825	0.0329787163400912	0.0668562757397954	0.399420003085774	-0.0479800289018217	0.0997475074901965	-0.0590354702969522	-0.00853163362111692	4	-0.0039499063324236	0.07245048173112	0.03622524086556	0.91672805834607	0.967284090883131	-0.0926356906978841	-0.175819783322284	-0.139315575536269	-0.079968304703415	4	-0.121934838564963	0.0440655092608517	0.0220327546304258	0.00146736623428643
A0A087WW65	NA	NA	NA	NA	0	NA	NA	NA	NA	NA	NA	NA	NA	NA	0	NA	NA	NA	NA	NA	NA	NA	NA	NA	0	NA	NA	NA	NA	NA	NA	NA	NA	NA	0	NA	NA	NA	NA	NA	NA	NA	NA	NA	0	NA	NA	NA	NA
A0A087WWP4	0.599216484401398	-0.221752219399655	-0.139958653108046	-0.370739382305414	4	-0.0333084426029293	0.432370499596712	0.216185249798356	0.882603449717301	0.958028807359211	0.493938327025759	-0.41161878905138	0.026381444426631	-0.124057992684983	4	-0.00383925257099326	0.378343981548968	0.189171990774484	0.984466092459641	0.993132554175087	0.186096292113458	-0.288797501898876	-0.101420317895857	0.0811960828479809	4	-0.0307313612083236	0.209074982997724	0.104537491498862	0.778681831338266	0.930417065666236	0.0486099442246216	-0.398188314586624	0.00509486712276347	-0.116895657255847	4	-0.115344790123771	0.201154774963911	0.100577387481955	0.2951198798108	0.604026673438083	0.148445274031861	-0.0698214494975714	0.287309898017787	0.131705679211822	4	0.124409850440975	0.147074985501718	0.0735374927508591	0.14163602511875
A0A087WWU8	0.0753505577619025	-0.00963727725903402	-0.0999737831931785	-0.0019020372443746	4	-0.00904063498367115	0.0717449798847767	0.0358724899423883	0.809435225696762	0.92640666431081	0.131476489006663	0.135869006251114	0.113555929293541	0.11755393440569	4	0.124613839739252	0.0107376964463435	0.00536884822317173	4.19338260414977e-07	0.000633829780617238	0.0323053139948317	0.0106003051537465	0.0224257630612349	0.072196084597029	4	0.0343818667017105	0.0267253826296305	0.0133626913148152	0.042165927004776	0.324639444081343	0.0355142866129383	0.0345384187044788	0.0681191542665708	0.0252962946157558	4	0.0408670385499359	0.0187423696486865	0.00937118482434324	0.00476570069693392	0.0840293058084434	0.16359391046631	-0.116559509324324	-0.115141901894687	-0.089342574468562	4	-0.0393625188053157	0.135881331061809	0.0679406655309047	0.583424130213108
A0A087WWW7	0.00734820794479518	0.0285314844106853	0.258940199351693	NA	3	0.0982732972357244	0.139544161028379	0.0805658589335752	0.204659004895567	0.516000143285488	0.0657069014370603	-0.0522772788670546	0.0934213721818396	NA	3	0.0356169982506151	0.077369735263177	0.0446694374813253	0.384350053821705	0.662373206034687	-0.155783209591681	-0.103645268153795	-0.0439821813863609	NA	3	-0.101136886377279	0.0559427069535812	0.0322985369188465	0.0133950390873395	0.203483432969987	-0.223141678710281	-0.10544929858373	-0.066142356791212	NA	3	-0.131577778028408	0.0816958986077642	0.047167149052881	0.0206831191555627	0.1741645381818	-0.161510179189426	0.184099968809387	-0.0182237586189073	NA	3	0.00145534366701805	0.173643438977766	0.100253086236826	0.986827855245444
A0A087WXB0	NA	NA	NA	NA	0	NA	NA	NA	NA	NA	NA	NA	NA	NA	0	NA	NA	NA	NA	NA	NA	NA	NA	NA	0	NA	NA	NA	NA	NA	NA	NA	NA	NA	0	NA	NA	NA	NA	NA	NA	NA	NA	NA	0	NA	NA	NA	NA
A0A087WXL6	-0.0185359514374278	0.161576420151851	-0.0185161263458837	-0.0152869779011945	4	0.0273093411168362	0.0895244086344493	0.0447622043172246	0.564173583707016	0.801455236628905	-0.125918964141583	0.0191257114871856	0.0949802000384015	-0.0346336351013579	4	-0.0116116719293384	0.0929207220341991	0.0464603610170996	0.810981296793384	0.916754512038518	-0.167476850437589	0.17794130436659	-0.107494832305542	0.102569733640548	4	0.00138483881600167	0.165105644310425	0.0825528221552126	0.987159876901954	0.998439756181397	0.0111924148702044	-0.0517614276897416	-0.0222880672017846	-0.0608089124881715	4	-0.0309164981273733	0.0325355082889089	0.0162677541444544	0.106099582936155	0.385967556216601	-0.0860199796051622	0.133218799807203	0.091599519333844	0.180884213432179	4	0.079920638242016	0.116486082797429	0.0582430413987147	0.21909256447028
A0A087WXS7	0.152494140094069	0.0247597305214769	-0.0515024254376216	-0.0443941193584535	4	0.0203393314548676	0.0945799327940343	0.0472899663970171	0.682142861939618	0.866072184646562	0.0358321058550292	0.0203917888311777	0.115093164431939	-0.040178914347041	4	0.0327845361927763	0.0639302830310848	0.0319651415155424	0.344623876227223	0.632542791642317	0.116682980165333	-0.101360714959241	0.0316679153660836	-0.0384741478146357	4	0.00212900818938493	0.0937263723248442	0.0468631861624221	0.965238626897154	0.993008049123194	-0.0112799248660028	0.0391847835608438	0.104969559601543	0.0986280327277159	4	0.0578756127560249	0.0548039993760573	0.0274019996880286	0.0791433647985153	0.33550419711969	0.0625845373780228	-0.036151425607935	-0.0679767938160067	-0.150824902247769	4	-0.0480921460734219	0.0882068165772364	0.0441034082886182	0.317362735253373
A0A087WY55	0.0753505577619025	-0.0212876369979597	0.119128568209085	0.168445855902824	4	0.0854093362189629	0.0806586910483774	0.0403293455241887	0.0785221874629932	0.331309738148106	0.119739244274096	0.0492090612522922	0.0761621718362348	0.100855888729753	4	0.086491591523094	0.030596423658945	0.0152982118294725	0.00131450762810757	0.0438961425997563	-0.00654878582893811	-0.0410068081282922	0.00751405365730662	0.0374747054186629	4	-0.000641708720315194	0.032576127746953	0.0162880638734765	0.969851682791539	0.993514617783403	-0.0203677976939618	-0.040278859642449	0.116000596725835	0.0938535274073686	4	0.0373018666991983	0.0790277160823442	0.0395138580411721	0.381603419071704	0.671822283432599	-0.0589307044873917	0.0352676349722808	0.0239456956250324	0.105651787563863	4	0.0264836034184461	0.0674457944382561	0.033722897219128	0.462134874520788
A0A087WYS3	0.0207234790097994	-0.251172902531723	NA	0.123787443755808	3	-0.0355539932553717	0.193711591639308	0.111839439578105	0.719575595824503	0.887023843036983	-0.0378398060256701	-0.217054240744085	NA	0.0924338272117802	3	-0.054153406519325	0.155387632141569	0.0897130912456733	0.50293415550371	0.74795271924507	0.0488224785846735	-0.385550734778463	NA	-0.326681624857997	3	-0.221136627017262	0.235637076982284	0.136045129826778	0.10967642489776	0.471425116410129	-0.146520397107369	-0.148828845649906	NA	0.00848147675509101	3	-0.0956225886673948	0.0901641534191127	0.0520562982477794	0.0795410757513961	0.33550419711969	-0.0992818790140846	0.134697728733116	NA	0.0841309805525915	3	0.0398489434238744	0.123114939465466	0.0710804434416512	0.532512680589538
A0A087WZ70	NA	NA	NA	NA	0	NA	NA	NA	NA	NA	NA	NA	NA	NA	0	NA	NA	NA	NA	NA	NA	NA	NA	NA	0	NA	NA	NA	NA	NA	NA	NA	NA	NA	0	NA	NA	NA	NA	NA	NA	NA	NA	NA	0	NA	NA	NA	NA
A0A087WZF1	0.0482955570407812	0.119756244457224	-0.0278640750827624	-0.315290642965218	4	-0.0437757291374938	0.190782037320026	0.0953910186600128	0.662454544294431	0.857644577045852	0.181262545376593	0.112314278272217	0.026381444426631	-0.202714936559982	4	0.0293108328788648	0.167156048727481	0.0835780243637407	0.737797959684625	0.88124139151603	0.0626523408736027	-0.0149725069361604	0.186983742851969	-0.234465253637023	4	4.95807880971713e-05	0.177093531974756	0.0885467659873782	0.999571386010245	0.999670353048356	-0.061986886895701	0.115966018048325	0.050156674972159	-0.230068617612081	4	-0.0314832028718246	0.151407820241589	0.0757039101207945	0.69196762764864	0.867373467688113	0.110274363574362	0.0927036400684891	-0.0408144628334816	-0.384712962422046	4	-0.0556373554031693	0.22952285486096	0.11476142743048	0.645002714509463
A0A087WZK0	0.427263801612103	0.0601993997767689	-0.0123176418767779	0.0991554666595613	4	0.143575256542914	0.194684734554729	0.0973423672773644	0.190671807650698	0.500490273087997	0.193445167642663	-0.119011267834239	0.101198722773559	-0.120137623313641	4	0.0138737498170856	0.158628518922158	0.079314259461079	0.866894974145972	0.944709267066789	0.278415788546141	-0.126692004915863	-0.0873451326841347	-0.0880561766651962	4	-0.00591938142976302	0.1904460742291	0.0952230371145501	0.952451832825939	0.992243437478377	-0.149009949133067	-0.20083964422645	0.0938535274073686	0.0336307778812802	4	-0.0555913220177169	0.141560895173116	0.0707804475865579	0.462094086859809	0.732169124756014	0.0878808319937787	0.0368504053349717	0.300440318946561	0.0605899797144671	4	0.121440383997445	0.121141042362466	0.0605705211812329	0.0917955589306276
A0A087X0W8	0.0146591781895446	0.0583556997930805	0.0423019426865444	-0.0326806987946631	4	0.0206590304686266	0.0398772260514761	0.019938613025738	0.340082884238257	0.64739959638051	-0.285835786120474	-0.0832173793061615	-0.156261838235643	0.0285338357369732	4	-0.124195291981326	0.131860138676092	0.0659300693380458	0.108590080224563	0.373881335442887	-0.00130738118678661	0.104633541190593	-0.0439821813863609	0.0954803088542285	4	0.0387060718679185	0.0730483147153873	0.0365241573576937	0.330048499272394	0.699675044390216	0.0871984419018694	-0.0370148423205552	-0.0750754815612197	0.145523657952177	4	0.0301579439930679	0.103519923096965	0.0517599615484824	0.581348641269425	0.812490495865682	0.0608822421470223	0.0525833315995681	0.0140165783813007	0.0907870248429047	4	0.0545672942426989	0.0316230091148149	0.0158115045574074	0.0136144312069838
A0A087X188	0.0471076648033199	-0.0251920914538757	0.0303417080452137	0.0207585601667974	4	0.0182539603903638	0.0309434017878343	0.0154717008939171	0.282722727883744	0.600378545404969	0.0534198573377148	0.024183367993552	0.0871691628695006	0.09412217736455	4	0.0647236413913294	0.0323489549181684	0.0161744774590842	0.0071060903697655	0.0967385160211468	0.0639030518673132	-0.0410068081282922	-0.0266117302473197	0	4	-0.000928871627074675	0.0464395353392805	0.0232197676696403	0.969388235441474	0.993376486691381	-0.0203677976939618	-0.00636952487572728	0.0468666050379743	0.0664954117869068	4	0.021656173563798	0.0416236193878711	0.0208118096939355	0.338177092288176	0.636952866035612	0.191089611440355	0.0305088784611451	0.076413115519168	0.0673552678017647	4	0.0913417183056081	0.0693985820635444	0.0346992910317722	0.0389353794648288
A0A087X1G7	0.152494140094069	-0.0409164437468922	-0.00614567506934977	0.0956020288018068	4	0.0502585125199084	0.0894473085903025	0.0447236542951513	0.304056701064855	0.618080121539726	0.172767751211138	-0.00385575741549948	0.101198722773559	0.147131861892354	4	0.104310644615388	0.0779523073817151	0.0389761536908575	0.0367183511728816	0.223339186309097	0.211147664168825	-0.0366350016286522	-0.0113449735940093	0.0430128889600929	4	0.0515451444765642	0.111469979208731	0.0557349896043656	0.390735782557849	0.729582625492513	0.245323156381242	0.0878366448645277	0.00678916566263907	0.175961391172981	4	0.128977589520348	0.103869079129966	0.0519345395649828	0.047581487688248	0.263924472076282	-0.140794202149327	-0.401576914219453	-0.0616630198838045	-0.0687989969853035	4	-0.168208283309472	0.159631397396815	0.0798156986984073	0.0796521226285582
A0A087X1H5	0.129107602628878	-0.0568140706271009	-0.131536591590073	-0.145891309242654	4	-0.0512835922077374	0.126441993813433	0.0632209969067166	0.448236639720223	0.734732310034821	0.0809199953835673	-0.0509469928890846	-0.0733876560386167	-0.0853255981962689	4	-0.0321850629351007	0.0767383745791827	0.0383691872895913	0.433707979086193	0.697314497249694	-0.0357219222339617	0.0419417630733082	-0.127929947914334	-0.0541557700469054	4	-0.0439664692804732	0.0697660006415758	0.0348830003207879	0.254324390406451	0.635853493535597	-0.0832555036493523	0.0236383503548593	0.0468666050379743	-0.0102440314968031	4	-0.00574864493833047	0.0567435214216607	0.0283717607108303	0.846129257005369	0.933180862432408	0.239298704482974	0.145007997510811	-0.0595645539998068	-0.104469266556029	4	0.0550682203594872	0.163933845888142	0.0819669229440711	0.526696742291954
A0A087X1Z3	-0.0461601991457803	-0.260347464712233	0.133176342694717	0.261766659670592	4	0.0221088346268242	0.226726036191759	0.11336301809588	0.851808369704088	0.942856314446645	-0.0411298759598548	0.0380011884245561	0.176749755780736	0.241562183059675	4	0.103795812826278	0.128626381988282	0.064313190994141	0.157673546701675	0.449667105357701	-0.227410496103073	-0.138354922441443	0.00751405365730662	0.0448542357842605	4	-0.0783492822757371	0.126979711816869	0.0634898559084347	0.263327218473225	0.642340932545152	-0.0832555036493523	0.042274067484084	0.0681191542665708	0.103386789238852	4	0.0326311268350386	0.0812167086310248	0.0406083543155124	0.452303600316182	0.7242128091927	-0.105003082972735	-0.292213870834019	-0.0141540943098603	0.152533398557027	4	-0.0647094123898969	0.185411378287388	0.0927056891436938	0.511302103666047
A0A087X2D5	0.199229591495905	0.170138433655275	-0.0294279722991986	NA	3	0.113313350950661	0.12447042977538	0.0718630361369638	0.118171715379159	0.409670981182567	-0.0477326107841018	0.135869006251114	0	NA	3	0.029378798489004	0.0952613447048677	0.0549991630087211	0.551271309228464	0.77397962460971	-0.0357219222339617	0.0766579685294077	0.0168519182366428	NA	3	0.0192626548440296	0.0562287177538254	0.0324636653313586	0.509890271083633	0.806501511932872	0.365314032048971	0.10566626467747	-0.0205613224823165	NA	3	0.150139658081375	0.196744401062154	0.113590432914786	0.17498716149731	0.481334112107705	0.110274363574362	0.34606744847278	-0.0284484296293695	NA	3	0.142631127472591	0.189342958319369	0.109317207954848	0.179629791148937
A0A087X2I1	0.0255566327457428	-0.029107141457259	-0.00922835795353759	0.0037965680880791	4	-0.00224557464424366	0.0229475725582484	0.0114737862791242	0.851294330134909	0.942856314446645	0.0646869685272143	-0.00643199924453228	0.00166304922264432	-0.0272729301501037	4	0.00816127208880568	0.0396060917653744	0.0198030458826872	0.694569218834751	0.852310900871557	0.0664012257225095	0.0106003051537465	0	-0.0210336998721968	4	0.0139919577510148	0.0373309802098879	0.0186654901049439	0.481832420488532	0.795779565103448	0.0377051678857486	-0.0353855987358967	0.0219489728336448	0.011860155210061	4	0.00903217429838944	0.0314638431802985	0.0157319215901493	0.586742190182559	0.813839564906703	0.0549083411023894	-0.0114047632722494	-0.0595645539998068	-0.079968304703415	4	-0.0240073202182705	0.0599512432509291	0.0299756216254646	0.453730144010489
A0A096LNZ9	-0.0297729233201317	-0.0588136482734494	0.0423019426865444	0.0393742383341444	4	-0.00172759764322307	0.0505744296762757	0.0252872148381378	0.947751559167484	0.986508756892756	-0.0588047682830459	0	0.00166304922264432	-0.0457455902215825	4	-0.025721827320496	0.0311286359452672	0.0155643179726336	0.149496324572524	0.438624114448628	0.0664012257225095	0.0148187147115452	0.0426809080885015	-0.046293652273935	4	0.0194017990621553	0.0486064468010844	0.0243032234005422	0.455111839294018	0.775367103779924	0.114439680488566	0.015801856122893	-0.0257477691976516	-0.0714955912854187	4	0.00824954403209728	0.079264297158748	0.039632148579374	0.841995571592615	0.931816442393333	-0.0269000031947044	0.0320968753643372	-0.0595645539998068	-0.156725503687453	4	-0.0527732963794068	0.0790032824978723	0.0395016412489361	0.22999464995211
A0A096LP69	NA	NA	NA	NA	0	NA	NA	NA	NA	NA	NA	NA	NA	NA	0	NA	NA	NA	NA	NA	NA	NA	NA	NA	0	NA	NA	NA	NA	NA	NA	NA	NA	NA	0	NA	NA	NA	NA	NA	NA	NA	NA	NA	0	NA	NA	NA	NA
A0A096LPI6	-0.0360537126954574	-0.0952882184417366	0.0992290107713798	0.0614005446641434	4	0.00732190607458229	0.0890350062286117	0.0445175031143058	0.874760161737219	0.953968242760323	0.00745030448520684	0.00512503217786717	0.102749174336959	0.169724863404828	4	0.0712623436012153	0.0798590604634402	0.0399295302317201	0.124563075222752	0.406164294179069	0.036133786053713	-0.0764665358083966	0.0279781562170223	0.0430128889600929	4	0.00766457385560789	0.0564230587188058	0.0282115293594029	0.79497249122882	0.93811771145716	0.0486099442246216	0.00634152687382669	0.0762105666201186	0.104969559601543	4	0.0590328993300274	0.0419931253694262	0.0209965626847131	0.0306934711434393	0.217808364475627	0.0115026892889771	-0.0938669234642224	-0.112964248589317	-0.0987781544781735	4	-0.0735266593106839	0.0572616157806207	0.0286308078903104	0.0424436121472738
A0A0A0MQR2	0.0961757074392649	0.171844755605678	0.138757374958017	-0.068110188332261	4	0.0846669124176748	0.106456641184953	0.0532283205924763	0.162795205667955	0.465230288828379	-0.0182554097072682	0.185245800726068	0.0116012862787634	-0.0777023569932438	4	0.0252223300760799	0.112955520830078	0.0564777604150392	0.670838657162001	0.840424890427157	0.0538668719787356	0.160912575034748	0.0463333025478348	-0.0248911755417107	4	0.0590553935049019	0.076617413681767	0.0383087068408835	0.174115465268115	0.561740716654762	0.0134205157623216	0.117431427052824	0.0386084540356654	-0.2481401905341	4	-0.0196699484208222	0.158626174490846	0.0793130872454232	0.81240098799492	0.91808904176024	0.170714437872893	0.360043467458912	0.0591351240873325	0.0452510810949005	4	0.15878602762851	0.145450255779549	0.0727251278897745	0.0717270753490104
A0A0A0MRG8	-0.0285200400100499	0.112666819670905	0.0848450926087239	0.0848888975865131	4	0.0634701924640229	0.0627113979126787	0.0313556989563393	0.0893789715701976	0.347738263908246	-0.152951922838599	-0.0955073309286238	0.0116012862787634	-0.137863792210014	4	-0.0936804399246183	0.0742806765116878	0.0371403382558439	0.0451443842296515	0.245810693136872	-0.255214901374495	0.00636952487572728	0.11576694430933	-0.171111916392755	4	-0.076047587145548	0.168051131122264	0.084025565561132	0.400317981962974	0.741066294840214	-0.0785019736787177	0.136347518046345	0.0729794453571056	0.0402638702137272	4	0.0427722149846151	0.0901527125480439	0.0450763562740219	0.379315792179705	0.671638034777977	-0.407948074492525	0.00324201269215202	0.347060705462837	0.0210616155278296	4	-0.00914593520242646	0.309296122688571	0.154648061344286	0.954760889000543
A0A0A0MRM9	-0.12832409697554	-0.18853444250622	-0.0515024254376216	-0.133327847778742	4	-0.125422203174531	0.056327046488565	0.0281635232442825	0.00431360053139927	0.0664514028429563	-0.0345572220363686	-0.0390292974283696	0.0618857987487328	-0.0569437968264465	4	-0.017161129385613	0.0535783485164305	0.0267891742582153	0.545455636268651	0.771962728670474	0.0348587572116513	0.0947044239468613	0.133044935741165	-0.0133495536590197	4	0.0623146408101646	0.0646291176419067	0.0323145588209534	0.102073693724223	0.46079251550301	0.0637394690778804	0.0391847835608438	0.16234382245791	0.0386084540356654	4	0.0759691322830749	0.0587624039528009	0.0293812019764004	0.041454174722035	0.246200334351104	-0.0178774907302559	-0.132481504612497	-0.0616630198838045	-0.00176909285305571	4	-0.0534477770199032	0.0584515525212616	0.0292257762606308	0.117184609905928
A0A0A0MS54	-0.211181029379824	-0.0057746376266351	-0.0138647680742564	-0.068110188332261	4	-0.074732655853244	0.0950826373118532	0.0475413186559266	0.167020915181368	0.471432517827522	-0.0688428879205336	0.0627903728891259	-0.0698902118023897	0.0513090938255769	4	-0.00615840825205513	0.0731380771577146	0.0365690385788573	0.87179814437538	0.946300104289685	-0.0751014552407188	-0.00639777119815066	-0.12176896328766	-0.0404250541847969	4	-0.0609233109778316	0.0493167523922873	0.0246583761961436	0.0484121120876947	0.340124139881516	-0.0456587169917007	0.124736227676057	-0.0967433988592206	0.0219489728336448	4	0.00107077116469511	0.0957084137017554	0.0478542068508777	0.982873843251474	0.993389377515615	-0.262323893610179	-0.0613299886039318	-0.168416694937035	-0.284408056626361	4	-0.194119658444377	0.101812820558472	0.0509064102792359	0.00882983959681023
A0A0A0MSA9	0.0122263023332594	0.123287935427477	0.142929026175675	0.249027547839915	4	0.131867702944082	0.0970162516942525	0.0485081258471263	0.0347134090615272	0.220923443353677	-0.139959902619279	0.160194428670701	0.143993662514345	0.125831037091888	4	0.0725148064144137	0.142343557939897	0.0711717789699483	0.347575504133279	0.636029509076817	-0.00654878582893811	-0.0854693421893495	0.12097210344059	0.0811960828479809	4	0.0275375145675709	0.0922707788641196	0.0461353894320598	0.572402892279406	0.84039531003431	0.163418473316995	0.095292449783575	0.112857469031855	0.213127151777381	4	0.146173885977452	0.053163332542369	0.0265816662711845	0.00151621170996264	0.0449363529335006	-0.11844145729754	0.158156701557105	0.252262950918586	0.307714235667662	4	0.149923107711453	0.18926068035863	0.0946303401793148	0.164216132370447
A0A0A0MSJ9	NA	0.240121196786792	-0.123163410565068	-0.0268594600659424	3	0.0300327753852605	0.188205927976977	0.108660743180591	0.754528557105134	0.904417061113727	NA	0.132360220473975	-0.216856362966597	-0.00541349618636433	3	-0.0299698795596622	0.175898600081862	0.101555104107341	0.738677878692796	0.88124139151603	NA	-0.00853668195448543	-0.0913526214856594	0.0169841796308787	3	-0.0276350412697554	0.0566372325899002	0.0326995214819343	0.358796929056438	0.716909912754233	NA	-0.0817146497913695	-0.156167811059654	0.119136891528136	3	-0.0395818564409622	0.142406281544632	0.0822183049840869	0.589937983292479	0.814784564210361	NA	0.206775406777284	-0.0428858128531764	-0.0706545535637854	3	0.0310783467867741	0.152790275891972	0.0882135069157872	0.691178199381249
A0A0A0MSK5	0.0636498039178172	-0.0448744573155755	0.0482450820525748	0.0956020288018068	4	0.0406556143641558	0.0603347174632686	0.0301673587316343	0.226422674228205	0.537080336175768	0.0410272682600547	0.0267055627633801	0.0442428379614828	0.0856605986163539	4	0.0494090669003179	0.0253414490624161	0.0126707245312081	0.00798889057961318	0.103979834153402	0.0220461060272576	0.00636952487572728	0.0716443910770223	0.00757321970480085	4	0.026908310421202	0.030662927609232	0.015331463804616	0.129771226728093	0.497333022009702	-0.0112799248660028	0.022074453138423	0.123828586852858	0.0386084540356654	4	0.043307892290236	0.0575510083689602	0.0287755041844801	0.183022591386138	0.489665792088407	0.0719114258425618	-0.0783631857633739	0.143527311377705	0.0537928173607031	4	0.047717092204399	0.0925528944385093	0.0462764472192546	0.342239860994727
A0A0A0MT32	-0.255930536113122	-0.14540133326954	0.0318421710415052	-0.0114500207435382	4	-0.0952349297711738	0.131032116253093	0.0655160581265465	0.196278294642395	0.506728673638745	-0.083466822517315	-0.165759527025718	-0.0927766411468073	0.016119665363277	4	-0.0814708313316408	0.0747446644324518	0.0373723322162259	0.0720635914314642	0.30214734659822	-0.132676488771385	-0.0990797737080026	-0.201822214853695	0.00757321970480085	4	-0.10650131440707	0.0872530656847195	0.0436265328423598	0.0503891179624807	0.347626990804536	-0.00675736617530875	-0.0111651914773764	-0.163770964577467	-0.0590354702969522	4	-0.0601822481317762	0.0730041714091083	0.0365020857045541	0.150297495987221	0.449405865845074	-0.274092327757734	-0.214839026904813	-0.137101154470827	0.0605899797144671	4	-0.141360632354727	0.145852631443728	0.0729263157218642	0.100664460774552
A0A0A0MT60	0.0973238929681455	0.0766875225653379	-0.048328177642478	0.0151266920874671	4	0.0352024824946181	0.0657279411217194	0.0328639705608597	0.325282619495549	0.635440845549269	0.0148623320079062	0.102783640534095	0.0148988763793384	0.0513090938255769	4	0.0459634856867292	0.0415908533006452	0.0207954266503226	0.069117690876418	0.295534341611615	0.024617755622432	0.164714145194604	0.0426809080885015	0.0503642171765386	4	0.070594256520519	0.063667892461324	0.031833946230662	0.0684256718123437	0.402388027078141	0.0744499491598812	0.101229474791427	0.035291912251201	0.0468666050379743	4	0.0644594853101209	0.0295076162417222	0.0147538081208611	0.00472411677715462	0.0840059118666966	0.00708942478631913	0.216584930035289	-0.0574691359976134	0.033207045389919	4	0.0498530660534785	0.117506579302753	0.0587532896513764	0.428698108817567
A0A0A0MTB8	0.172242365354856	0.240121196786792	-0.191550385545318	0.252222886999721	4	0.118259015899013	0.209517522841392	0.104758761420696	0.302056540664883	0.61563549403727	0.359008746939651	-0.0103050083917385	-0.234367374126765	0.0460850867625645	4	0.0401053627959278	0.24468456861447	0.122342284307235	0.754189982523748	0.889972346813553	0.165271142436095	0.110558375147698	0	0.100800640787492	4	0.0941575395928215	0.0688861499671872	0.0344430749835936	0.0340179922933919	0.296358474648195	0.0507810432662489	-0.221068969229246	-0.105868635106823	0.166897308744744	4	-0.0273148130812689	0.17081050613887	0.0854052530694352	0.759943917153716	0.896516688647952	0.217307132176665	0.240134003723715	0.154415627520441	0.356861884996749	4	0.242179662104393	0.0846115939203003	0.0423057969601501	0.00123251591153361
A0A0A0MTH3	-0.0808019400632702	0.0228701493202587	0.0497270493538055	0.0449124218755744	4	0.0091769201215921	0.0611147523718354	0.0305573761859177	0.774068412541739	0.91406594184128	0.0116904105230251	0.00256479185930319	-0.00500068105836646	0.00718654059326923	4	0.00411026547930776	0.00712553864590971	0.00356276932295485	0.292511217843685	0.592421887953057	-0.0210616155278297	-0.0410068081282922	-0.0635311937911452	0.0113449735940093	4	-0.0285636609633145	0.0317623470028104	0.0158811735014052	0.12219141232116	0.483018672175939	-0.0410272682600549	-0.0321326209408091	-0.0466820427853945	0.0319677286586358	4	-0.0219685508319056	0.0364528094984996	0.0182264047492498	0.273456813650881	0.58920880090279	-0.0663529461490856	-0.0528882147172702	-0.0595645539998068	0.0123232784501301	4	-0.0416206091040081	0.0363802858466152	0.0181901429233076	0.0621068936285206
A0A0A0MTH9	NA	NA	NA	NA	0	NA	NA	NA	NA	NA	NA	NA	NA	NA	0	NA	NA	NA	NA	NA	NA	NA	NA	NA	0	NA	NA	NA	NA	NA	NA	NA	NA	NA	0	NA	NA	NA	NA	NA	NA	NA	NA	NA	0	NA	NA	NA	NA
A0A0A0MTL6	0.300404165079363	0.0965870800030428	-0.165523912288713	-0.054228479463029	4	0.0443097133326657	0.201707062479465	0.100853531239733	0.675791347394442	0.863701168244239	0.217506065976422	0.0392508160824937	0.0586939942590233	-0.169925001442312	4	0.0363814687189066	0.159033079695547	0.0795165398477734	0.663387640766295	0.836637813114939	0.302986531233902	0.15327925013232	-0.115634177115558	-0.22112745409987	4	0.0298760375376984	0.240827510906558	0.120413755453279	0.812321452130962	0.943391375256203	0.408280133103535	-0.0867678775176549	-0.154273267069877	-0.0858687616352223	4	0.0203425567201952	0.260601700146336	0.130300850073168	0.881058864641352	0.948305090283965	-0.135905363039025	0.390074630711873	-0.152673958391288	-0.212993723334198	4	-0.0278746035131598	0.280592334710186	0.140296167355093	0.849071338457338
A0A0A0MTS2	-0.112308816425053	-0.132708919666383	-0.00460680021316022	-0.0443941193584535	4	-0.0735046639157624	0.0594565543854069	0.0297282771927035	0.0482904441806269	0.263460861538949	-0.0193364850975993	-0.0154852474974187	0.00994966040760506	0.0232265518575367	4	-0.000411380082469048	0.0204245282696606	0.0102122641348303	0.969174518788942	0.989467939986144	-0.0505327340189932	-0.0344540563291262	-0.032378673466206	-0.0502193554877351	4	-0.0418962048255152	0.00982909712492366	0.00491454856246183	0.000142767995249708	0.0159847277644396	-0.00450139223494084	-0.0484713577555569	-0.0240168811185356	-0.0205613224823165	4	-0.0243877383978374	0.0181683468240622	0.0090841734120311	0.0363109451820949	0.231854417824485	-0.04786845189098	-0.0681191542665708	-0.134890127155474	-0.139095609665662	4	-0.0974933357446716	0.0463851299384509	0.0231925649692255	0.00566287239157561
A0A0A6YYL4	0.0327761392588232	-0.0212876369979597	-0.0771510128082319	-0.068110188332261	4	-0.0334431747199073	0.0504807936555337	0.0252403968277668	0.233398683617354	0.54652534513963	0.0358321058550292	0.0279650085359785	-0.0302674396687965	-0.0815089424229785	4	-0.0119948169251918	0.05492511441094	0.02746255720547	0.677558364416073	0.843946821437902	0.0601476613540613	0.0378020327123842	-0.0420417708169257	-0.0640440544113535	4	-0.00203403279045843	0.0602753047409625	0.0301376523704812	0.948383358707574	0.989973374783493	0.0200842460433324	0.0376376573633653	-0.00682126585601406	-0.0292157877928547	4	0.00542121243945722	0.029453375233363	0.0147266876166815	0.725420663529987	0.882602957370774	0.154044873679423	0.0588287744304665	-0.0616630198838045	-0.0855855540096689	4	0.0164062685541041	0.111416935117236	0.0557084675586179	0.778297650583753
A0A0B4J1V8	-0.0640187212314359	-0.122216545848741	0.431425441112569	0.0037965680880791	4	0.062246685530118	0.251448474826545	0.125724237413272	0.638132598518867	0.848317873932513	-0.0367447812741326	-0.0589471707329094	0.191396531745137	0.09074349890958	4	0.0466120196619187	0.116906289164821	0.0584531445824106	0.455594106140465	0.715837166769572	-0.0654971731836218	0.0190248256817562	0.108797389494488	0.158064846232251	4	0.0550974720562185	0.0988774756193477	0.0494387378096738	0.307722147839886	0.680002962660801	-0.231032464329747	0.0499684592740846	0.328717260550001	0.0419173890662409	4	0.0473926611401451	0.228546635697802	0.114273317848901	0.692759314951668	0.867373467688113	0.207338963085429	0.00486029109053476	-0.226086045011123	0.0774440854253484	4	0.0158893236475473	0.181765115588828	0.090882557794414	0.866960896944796
A0A0C4DFL7	-0.10568790053251	0.244992428339488	0.0122133642925727	-0.0191341669567153	4	0.033095931285709	0.14980558757319	0.074902793786595	0.67407635821334	0.863550982506998	-0.0378398060256701	0.262178460960932	0.0808897403732194	-0.089152377736782	4	0.0540190043929249	0.155979145532622	0.0779895727663111	0.514433281752792	0.756320269550265	0.0399521254001081	0.427748551028398	0.153509038300881	0.00946032924906631	4	0.157667510994613	0.190423512035231	0.0952117560176157	0.148807656042659	0.52490728613414	-0.207488414398796	0.247592975461591	-0.318529518425497	-0.394765104252583	4	-0.168297515403821	0.287725592933721	0.14386279646686	0.286424475230893	0.5971456473262	-0.347923303420307	0.19406435502773	0.395284651973192	0.0707260521410043	4	0.0780379389304048	0.313902346727038	0.156951173363519	0.636731712853112
A0A0C4DFM1	0.262010854857274	0.0453834026473282	0.0348384235014249	-0.0581810710885293	4	0.0710129024793746	0.135568881397099	0.0677844406985493	0.33516560257382	0.64354494559113	0.0441354095862386	0.0140502619573511	-0.0201075734485748	-0.0682296043729615	4	-0.00753787656948666	0.0482274449201857	0.0241137224600929	0.765166400893045	0.896719619497112	0.0639030518673132	0.0106003051537465	0.0481560381546526	-0.0287589929814239	4	0.0234751005485721	0.04138328491998	0.02069164245999	0.29985886311791	0.669952750760096	0.0245096944241276	-0.00956486403553405	0.0435690149373992	-0.0484403550577532	4	0.00251837256705991	0.0404622046028669	0.0202311023014335	0.905000756981871	0.961622948455604	0.134755070439818	0.0743251107536346	0.0591351240873325	-0.0285691521967708	4	0.0599115382710037	0.0674258624561209	0.0337129312280604	0.125879446908758
A0A0C4DFP4	-0.00245774342385363	NA	0.0920549778836438	-0.0229916426262292	3	0.0222018639445203	0.0613596235268557	0.0354259951606042	0.487541090386972	0.753719967177173	0.123662278753665	NA	0.213091602844456	0.0443395390107351	3	0.127031140202952	0.0844264572431735	0.0487436378160727	0.0264042128365291	0.192801776340163	0.120294233717712	NA	0.200159131599703	-0.052186220197136	3	0.0894223817067594	0.128974212842363	0.0744632965030583	0.210666158380812	0.593523125398717	-0.0180904569828959	NA	0.139358285146463	0.0616131904071607	3	0.0609603395235759	0.0787264012910312	0.0454527089777074	0.169833481478245	0.473185819823719	0.0987063001214109	NA	0.221529823378978	-0.164630701772799	3	0.0518684739091966	0.197295018359786	0.113908331959795	0.609651040394898
A0A0C4DFX9	-0.936350196082183	0.863072670775819	0.169072999385489	0.269671857755938	4	0.0913668329587659	0.750458331525993	0.375229165762996	0.815732642686098	0.927401195502096	-0.280641558940225	0.374358841843586	0.104297961432445	0.487483779991891	4	0.171374756081924	0.341538430973959	0.170769215486979	0.354337981827735	0.641510461599915	-0.62874419274907	0.691573691352192	0.165313739213506	0.714390141498722	4	0.235633344828838	0.629598561081739	0.314799280540869	0.482446575503341	0.795779565103448	-0.554940017621705	0.709698728397213	0.295833898736218	0.156250064545236	4	0.15171066851424	0.526465566710147	0.263232783355074	0.585342731982801	0.813839564906703	-0.428125956430155	0.251084303284256	0.629214341459805	0.112209503586025	4	0.141095547974983	0.437875555946074	0.218937777973037	0.543117501552862
A0A0C4DG89	0.29541040778846	NA	0.0644635926107032	-0.271039868536177	3	0.0296113772876621	0.284828872433532	0.164446026172477	0.83809785000184	0.936278566354605	0.145050332803283	NA	0.179691031092858	-0.147806595457592	3	0.0589782561461829	0.179916579653166	0.103874885694432	0.52750583106268	0.763081652346642	0.457529581392923	NA	0.0572353320655147	0.362359143637437	3	0.292374685698625	0.20912254726808	0.120736958958846	0.0340140114306439	0.296358474648195	0.401490967440896	NA	0.0762105666201186	0.023623604525899	3	0.167108379528971	0.204677173331061	0.11817042111966	0.151780569580192	0.451606950630826	0.441881158406206	NA	0.443429099935068	0.205625570757041	3	0.363645276366105	0.136851267993123	0.0790111164147714	0.00271294424022827
A0A0C4DGB5	-0.0423619651636805	-0.118040869877547	0.0526864248343496	0.041222662726513	4	-0.0166234368700913	0.0797872080903756	0.0398936040451878	0.691398504794579	0.871595478134464	0.0021325872928124	0.024183367993552	0.300807748465719	0.255208375572038	4	0.14558301983103	0.15430309681783	0.0771515484089151	0.108104595206805	0.3730595791212	-0.0210616155278297	0.0806878455655607	0.158580027848303	0.102569733640548	4	0.0801939978816454	0.0750510634549348	0.0375255317274674	0.0764610467504778	0.414976201663724	0.0486099442246216	0.0712969687145964	0.178970141045319	0.136265690091081	4	0.108785686018905	0.0597425927815218	0.0298712963907609	0.0108114466247777	0.132319850796369	0.0600303407104654	-0.161228558658052	0.0649174766813386	0.0990641275291029	4	0.0156958465657137	0.119220847836951	0.0596104239184755	0.801122870339738
A0A0C4DGQ8	-0.0148096599791437	NA	0.344743990139574	0.66446485176061	3	0.33146639397368	0.339831850324214	0.196202010263893	0.0994672051376737	0.372601438824272	-0.487990100052223	NA	0.00664072537702959	0.320125852253377	3	-0.0537411741406055	0.407427697186525	0.23522849064595	0.795721707694309	0.910274307809272	0.196397212803503	NA	-0.157034293106857	0.810605456758025	3	0.283322792151557	0.48964141332039	0.282694601786916	0.284643587948383	0.660381862139649	-0.25765120913689	NA	-0.0985638344835895	0.351564329263616	3	-0.00155023811895457	0.315981995478943	0.182432290148843	0.992289144320583	0.997178086257264	-0.333299368823525	NA	0.282355016075022	0.501251794331924	3	0.150102480527807	0.432708863844998	0.249824579021647	0.504822540174801
A0A0C4DGV9	NA	NA	NA	NA	0	NA	NA	NA	NA	NA	NA	NA	NA	NA	0	NA	NA	NA	NA	NA	NA	NA	NA	NA	0	NA	NA	NA	NA	NA	NA	NA	NA	NA	0	NA	NA	NA	NA	NA	NA	NA	NA	NA	0	NA	NA	NA	NA
A0A0C4DGX4	-0.17746510254815	0.0803260996286861	-0.139958653108046	-0.0404790693550703	4	-0.0693941813456452	0.11534139892962	0.0576706994648098	0.274185655661644	0.587846267422092	-0.151765983568456	0.0127786047213025	-0.0664012257225098	-0.112328700102876	4	-0.0794293261681349	0.0706800177543883	0.0353400088771941	0.0656596772891763	0.28847276537709	-0.0104923738176424	0.0705919678300537	-0.154935827222859	0.0263341478134625	4	-0.0171255213492464	0.097670841440025	0.0488354207200125	0.737813614093926	0.919377805196182	-0.00901687335743373	0.0484328603628594	-0.0396701454300211	-0.0414199273799808	4	-0.0104185214511441	0.0419610709815751	0.0209805354907875	0.63715129163114	0.833146404055412	-0.0432840977288	0.121332470647071	-0.2642421874371	-0.0912247600465384	4	-0.0693546436413417	0.15864079512969	0.0793203975648448	0.415544000906635
A0A0D9SF70	0.132471836662255	0.125050544126737	-0.0231825294683002	0.00758317141906417	4	0.0604807556849389	0.0798950833353729	0.0399475416676864	0.180795260428534	0.4891141605038	0.0778901831935791	0.0229206151419164	-0.0998922907918574	0.00359774510860439	4	0.00112906316306064	0.0743383024454642	0.0371691512227321	0.976752121344851	0.990273815596817	0.0437603855284126	-0.00853668195448543	-0.123819702852422	-0.00952277411850655	4	-0.0245296933492503	0.0707178075134509	0.0353589037567255	0.513795757424032	0.806501511932872	0.195170952601424	-0.0111651914773764	-0.234065005322377	0.0517989005802049	4	0.000434914095468829	0.17859186100984	0.08929593050492	0.996271832125929	0.999246764604075	0.17150344256354	0.166856396507491	0.16342686881541	0.297680548640685	4	0.199866814131781	0.0652930950705781	0.032646547535289	0.00086752438183118
A0A0D9SGC1	-0.0310268956206247	-0.0568140706271009	-0.0755345476073138	-0.0385255212693154	4	-0.0504752587810887	0.0199096588646222	0.0099548294323111	0.00228701674718734	0.0480114696301899	-0.0488360104867513	-0.0696835554706704	-0.0577154978562874	-0.0217769423952516	4	-0.0495030015522402	0.0203623761339137	0.0101811880669568	0.00281654931731719	0.0665189733300771	0.0323053139948317	-0.0257630960650818	-0.0596001422012304	0.0466932354480415	4	-0.00159117220585973	0.0497650422894814	0.0248825211447407	0.951089364408077	0.991780609303063	0.00672586318831336	-0.0288869614371549	-0.0625845373780228	0.0101718050572912	4	-0.0186434576423933	0.0342036531294022	0.0171018265647011	0.317483229595619	0.624038280082507	-0.0341588614811978	-0.0081370494383384	-0.163901213814542	-0.0706545535637854	4	-0.069212919574466	0.0681346712434176	0.0340673356217088	0.0884613460388624
A0A0D9SGG1	0.0207234790097994	-0.0173937208934685	0.0408123245460578	0.079502351039454	4	0.0309111084254607	0.0403992048934979	0.0201996024467489	0.17682144146	0.48417682747607	0.00319769995904945	-0.00772184737773601	0.164924320383946	0.177708807637525	4	0.0845272451506961	0.100450457584733	0.0502252287923667	0.143371043813005	0.430905642001178	0.00781950445929924	-0.0410068081282922	0.0734354466030104	0.11664491885227	4	0.039223265446572	0.0697319789516186	0.0348659894758093	0.303580305582419	0.67380517443565	0.0551134640622819	-0.0451887737662554	0.0319677286586358	0.112857469031855	4	0.0386874719966294	0.0654506970407259	0.032725348520363	0.281854330428259	0.595965142884522	-0.074748867270142	-0.0579473492092796	0.0649174766813386	0.0874628412503395	4	0.00492102536306412	0.0830912146465358	0.0415456073232679	0.909578133067897
A0A0G2JH37	0.0823257286782404	0.0528104205473974	-0.0372729891334822	-0.068110188332261	4	0.00743824293997364	0.0715854495510103	0.0357927247755051	0.842248212895466	0.938950305794011	0.0829363409820719	0.0541625254864219	0.026381444426631	-0.0327899351176695	4	0.0326725939443638	0.0493733487400003	0.0246866743700002	0.233865158897462	0.531559680712051	0.0104166159453384	-0.150112893317614	-0.024694527253029	-0.036525876025114	4	-0.0502291701626048	0.0695089149742562	0.0347544574871281	0.198514306624611	0.587765669859156	0.0658879356564572	-0.152356219145232	-0.0222880672017846	-0.0292157877928547	4	-0.0344930346208535	0.0897122808832513	0.0448561404416256	0.471086808786786	0.737873276146349	0.184069183762582	-0.036151425607935	-0.0574691359976134	-0.0706545535637854	4	0.00494851714831206	0.120256955763136	0.0601284778815681	0.937085746812963
A0A0G2JHC2	0.0447289420205887	-0.0973418772097112	-0.0499144285344295	0.0263685285093811	4	-0.0190397088035427	0.0663647163769162	0.0331823581884581	0.58695822449444	0.81430688969559	-0.00427465510032587	0.0931896231932975	0.21595978478495	0.195119491186344	4	0.124998561016066	0.101512334239024	0.0507561671195121	0.0489380990651773	0.252888672605181	0.0259018634427571	0.0705919678300537	0.0626556078497676	0.134047965113716	4	0.0732993510590735	0.0449352687590834	0.0224676343795417	0.0171961360496726	0.230017341938763	0.0723142048158901	-0.117464674740571	0.0922585078519886	0.0369511361728915	4	0.0210147935250497	0.0951101581991532	0.0475550790995766	0.674040411192716	0.857019963829831	0.131514878081983	0.0447383147652844	0.0140165783813007	0.057195401581543	4	0.0618662932025279	0.0498521328800322	0.0249260664400161	0.0476765098958615
A0A0G2JIW1	-0.0860055346708099	-0.0173937208934685	-0.0123176418767779	0.00947275262028235	4	-0.0265610362051935	0.0413077728237152	0.0206538864118576	0.245836513594799	0.55917779960894	-0.0632575342896768	-0.0128928028808943	0.0148988763793384	-0.00722251841823834	4	-0.0171184948023678	0.0330136832389696	0.0165068416194848	0.339686058725782	0.631159747854284	-0.0250451294463276	-0.0497903667115313	-0.0056613350904266	0.0263341478134625	4	-0.0135406708587057	0.0321376109519892	0.0160688054759946	0.431716199165009	0.767692982397543	-0.061986886895701	-0.040278859642449	-0.0240168811185356	0.00848147675509101	4	-0.0294502877253987	0.0296885439145051	0.0148442719572525	0.0945051761493626	0.367119732140136	-0.0332495043499944	-0.0311680180936793	-0.0849498724197202	-0.0160004786937151	4	-0.0413419683892773	0.030071235606822	0.015035617803411	0.033309271092287
A0A0G2JJD3	0.118967572312507	0.152963289847143	-0.13658392632739	-0.268748057028188	4	-0.0333502802989818	0.203291886709842	0.101645943354921	0.753981629091817	0.904167901677038	0.146979069776232	0.0267055627633801	-0.0577154978562874	-0.19033121210415	4	-0.0185905193552061	0.141998419461913	0.0709992097309565	0.802200953287879	0.912703606243605	0.407175381505873	0.286602056034931	-0.0596001422012304	-0.0800076478916501	4	0.138542411861981	0.245703026003158	0.122851513001579	0.30250444408347	0.672899878193032	0.177396250873447	0.0637157897301943	-0.141080666601373	-0.250162188119311	4	-0.0375327035292605	0.193545163722722	0.0967725818613608	0.711517414912303	0.87720927621529	0.305488984177441	-0.116559509324324	0.0377326473551082	-0.0650950282218848	4	0.0403917734965851	0.188011322866937	0.0940056614334686	0.682435003561749
A0A0G2JLB3	0.0858007083773081	0.0209780899790503	-0.00614567506934977	-0.0761029790857917	4	0.00613253605030423	0.0670344254130526	0.0335172127065263	0.860850097197983	0.947160737089694	0.0253853184199134	-0.00256935961213325	0.0165448492228981	-0.0494686762642998	4	-0.0025269670584054	0.033398381783106	0.016699190891553	0.884680767840422	0.95310370322197	0.0475586195105125	-0.0542022815899131	-0.0304537965417139	-0.0760001590901254	4	-0.02827440442781	0.0538683572605074	0.0269341786302537	0.334260551657983	0.702202673844395	0.0572748053517491	-0.00318124724467991	0.0386084540356654	-0.0804620281082788	4	0.00305999600861396	0.0611495981184481	0.0305747990592241	0.923539325557543	0.970406458519448	0.0333687495851681	0.0835436407830131	0.0572025115533331	-0.0321804057491497	4	0.0354836240430912	0.0495458336809536	0.0247729168404768	0.202014204353102
A0A0G2JMH6	0.00367878237809849	0.0472437446728559	-0.062667616914998	0.0595778090573256	4	0.0119581797983205	0.0552275840983461	0.027613792049173	0.680111990727024	0.866072184646562	-0.103963229402895	0.010231922610956	0.0329021110792289	0.125831037091888	4	0.0162504603447945	0.0944682208851469	0.0472341104425735	0.742552377866939	0.882733903975151	-0.0764787298473609	0.110558375147698	0.00751405365730662	0.178337241258512	4	0.0549827350540392	0.112309658890551	0.0561548294452756	0.365330181851927	0.71909677918796	-0.00901687335743373	0.118895349086996	-0.0876755183408533	0.069741071290561	4	0.0229860071698176	0.090654647754195	0.0453273238770975	0.630170575058673	0.828578468832414	-0.101186427199445	0.178374980975757	-0.0491177665646911	-0.041248286267517	4	-0.00329437476397391	0.123998509909674	0.0619992549548371	0.959348756116389
A0A0G2JN29	-0.0160506880478334	-0.0154506969756756	-0.113179321992446	0	4	-0.0361701767539887	0.0518741451491127	0.0259370725745563	0.212601839906073	0.524221339344256	-0.0204183711932113	-0.0298275666565573	-0.0319677286586358	0.00179999404621017	4	-0.0201034181155486	0.0154399869309036	0.00771999346545181	0.0404407036817458	0.236611917080249	0.151218806912612	0.0440071822390924	-0.0893474855952824	0.0263341478134625	4	0.0330531628424712	0.0985057931974823	0.0492528965987411	0.527138641087807	0.812616069356675	0.11858535874612	0.00950186776715473	-0.0431718341415736	-0.0153934541233759	4	0.0173804845620813	0.0708171672184918	0.0354085836092459	0.640963580066832	0.83374909747936	-0.00444864688261037	0.071239130879892	-0.00807104225801664	0.057195401581543	4	0.028978710830202	0.0411185164586926	0.0205592582293463	0.208347353769662
A0A0G2JNU6	0.0351746353073399	-0.0057746376266351	NA	0.151432745526616	3	0.0602775810691069	0.0815546365568012	0.0470855913697312	0.186547279639997	0.494436643877638	0.069779437778367	-0.062963957664302	NA	0.156857932712513	3	0.0545578042755259	0.110698642571082	0.0639118910873404	0.35439049648424	0.641510461599915	0.0751109246950492	-0.0257630960650818	NA	-0.0660298703351972	3	-0.00556068056840991	0.0727068373632606	0.0419773121236049	0.880392519515815	0.969201233247017	0.0333200732000265	-0.0191935652333109	NA	0.294447358465255	3	0.102857955477324	0.167985996613798	0.0969867603650637	0.260771113151328	0.578138647393209	0.106978656736476	0.014532025911377	NA	0.149348639999072	3	0.0902864408823086	0.0689409342198758	0.0398030669300296	0.0422171280324722
A0A0J9YVP6	-0.0461601991457803	-0.0154506969756756	-0.0642697215114996	-0.0307376748768701	4	-0.0391545731274564	0.0209170376729977	0.0104585188364988	0.00957950504945973	0.108055387181033	0.0327060048683098	-0.0996273576436587	-0.00834412413273689	-0.0291095886297208	4	-0.0260937663844517	0.0553436148883564	0.0276718074441782	0.382097216121378	0.661936896467005	0.0563824698975185	-0.0675195611438364	0.0316679153660836	0.0281968918306521	4	0.0121819289876045	0.0545960866909819	0.0272980433454909	0.67106547751194	0.886740364223932	0.0245096944241276	-0.0353855987358967	0	0.0402638702137272	4	0.00734699147548953	0.0329551808182275	0.0164775904091138	0.67132408320634	0.855570279735567	0.0333687495851681	-0.0245501393291716	-0.0366806633264683	-0.0818382920564612	4	-0.0274250862817332	0.0474363379295722	0.0237181689647861	0.291518447171637
A0A0J9YW33	NA	NA	NA	NA	0	NA	NA	NA	NA	NA	NA	NA	NA	NA	0	NA	NA	NA	NA	NA	NA	NA	NA	NA	0	NA	NA	NA	NA	NA	NA	NA	NA	NA	0	NA	NA	NA	NA	NA	NA	NA	NA	NA	0	NA	NA	NA	NA
A0A0J9YWL0	NA	NA	NA	NA	0	NA	NA	NA	NA	NA	NA	NA	NA	NA	0	NA	NA	NA	NA	NA	NA	NA	NA	NA	0	NA	NA	NA	NA	NA	NA	NA	NA	NA	0	NA	NA	NA	NA	NA	NA	NA	NA	NA	0	NA	NA	NA	NA
A0A0R4J2G3	0.0399596978727167	0.101966931013696	0.0333410751149226	0.127272216080284	4	0.0756349800204048	0.0462647307693736	0.0231323653846868	0.0170414685382599	0.15387430666578	0.0441354095862386	0.0153207992837557	0.0426281818993879	0.11921315832738	4	0.0553243872741907	0.0446036208224401	0.02230181041122	0.0477591932146215	0.250368403734177	0.0886922363318829	-0.019279062494883	0.0316679153660836	0.0613214473730307	4	0.0406006341440286	0.0462151700786656	0.0231075850393328	0.129426570991596	0.497333022009702	0.0111924148702044	-0.0256485873706103	0.0762105666201186	0.0616131904071607	4	0.0308418961317183	0.0468418105736188	0.0234209052868094	0.235946422967859	0.552491120551384	-0.0515464527125961	-0.0545726224286231	0.0972534588010288	0.110572866948918	4	0.025426812652182	0.0907996161031879	0.0453998080515939	0.59571092674795
A0A0U1RQX8	-0.00122834834231003	-0.0789633478948566	-0.0868880241735184	-0.0268594600659424	4	-0.0484847951191568	0.0412495537722919	0.020624776886146	0.0569958225408645	0.281437241219824	-0.00213574434399111	-0.0193826700592163	-0.0217959236013446	0.016119665363277	4	-0.00679866816031877	0.0176093502110904	0.00880467510554518	0.469328775539319	0.72518786568849	0.0335826005243807	-0.019279062494883	-0.00944793842141167	-0.0680184234286511	4	-0.0157907059551412	0.0417047447202708	0.0208523723601354	0.477567440612904	0.792401730090458	0.0464355729902847	-0.027266865768993	-0.0679245621332215	0.0185938665752644	4	-0.00754049708416638	0.0504373738343029	0.0252186869171514	0.775022782940991	0.900420396937208	0.0437478953651674	-0.109539081646552	-0.072201379677732	-0.0855855540096689	4	-0.0558945299921963	0.0682002470845167	0.0341001235422584	0.152298201898785
A0A140TA84	-0.154050922093909	-0.0850635474312744	0.00611960637989825	0.0559254145979923	4	-0.0442673621368231	0.0936201507468127	0.0468100753734064	0.380821279599638	0.681196880609292	-0.110860589349566	-0.188982483843015	-0.103463319944055	-0.0144813767047317	4	-0.104446942460342	0.0713726445221669	0.0356863222610835	0.0263964960121719	0.192801776340163	-0.118420492920669	-0.0697511084424191	-0.0132445065094908	0.0829893646710316	4	-0.0296066858003869	0.0864967407813159	0.0432483703906579	0.519167054002709	0.807741638831801	0.00448739099231388	-0.0127672960738779	0.0583491730852669	0.035291912251201	4	0.021340295063726	0.0316841328502102	0.0158420664251051	0.226605940881605	0.539393511248103	-0.0907423898475654	0.0113153132278342	0.0629925997568464	0.142957953842043	4	0.0316308692447896	0.097920400092452	0.048960200046226	0.542150476747094
A0A182DWF2	NA	NA	NA	NA	0	NA	NA	NA	NA	NA	NA	NA	NA	NA	0	NA	NA	NA	NA	NA	NA	NA	NA	NA	0	NA	NA	NA	NA	NA	NA	NA	NA	NA	0	NA	NA	NA	NA	NA	NA	NA	NA	NA	0	NA	NA	NA	NA
A0A1B0GTJ7	0.0411534877967615	-0.0830272802747558	0.0197945432769748	0.108000957526282	4	0.0214804270813157	0.079157089822319	0.0395785449111595	0.606872248876348	0.828572639473788	0.0010666876943527	-0.0115983254132592	0.057095440033546	0.09074349890958	4	0.0343268253060549	0.0480159942090018	0.0240079971045009	0.202711909766394	0.502705580987539	0.00521770927101928	-0.0475894585182602	0.00751405365730662	0.0281968918306521	4	-0.00166520093982056	0.0323131303894281	0.0161565651947141	0.921268699396078	0.985490190472167	0.0355142866129383	-0.0288869614371549	0.0517989005802049	0.111283333533745	4	0.0424273898224333	0.0576266543936611	0.0288133271968306	0.191310333369167	0.499422398769423	-0.0441998039105352	-0.0698214494975714	0.039691500393165	0.160464672193246	4	0.0215337297945761	0.103759622245771	0.0518798111228853	0.692524435458934
A0A1B0GTK8	NA	NA	NA	NA	0	NA	NA	NA	NA	NA	NA	NA	NA	NA	0	NA	NA	NA	NA	NA	NA	NA	NA	NA	0	NA	NA	NA	NA	NA	NA	NA	NA	NA	0	NA	NA	NA	NA	NA	NA	NA	NA	NA	0	NA	NA	NA	NA
A0A1B0GU58	0.164594588804152	NA	0.163608238908678	-0.028797264307435	3	0.0998018544684651	0.111371195710483	0.0643001898234176	0.122734628588535	0.415374308126066	0.115805513027426	NA	0.0666603040690801	0.0513090938255769	3	0.0779249703073609	0.0336914907886258	0.0194517912762129	0.0049349614469506	0.083766686156702	0.00130619750062472	NA	0.131326418514866	0.154658244789002	3	0.0957636202681642	0.0826301825378347	0.0477065581314068	0.0616788189940213	0.378059721056802	0.389532503132841	NA	0.104969559601543	-0.105868635106823	3	0.129544475875854	0.248613187149648	0.14353689052494	0.329981700026258	0.632743457468032	-0.0524674198941356	NA	0.167015664300075	-0.0376142917997777	3	0.0256446508687205	0.122655927017421	0.0708154324812112	0.683170530118793
A0A1B0GVD5	-0.0197801904458903	-0.0728888334851722	0.0408123245460578	0.0650391217274915	4	0.00329560558562171	0.0620653609945116	0.0310326804972558	0.918886979482991	0.974252172980113	-0.0258400049352596	-0.0103050083917385	0.034527683128271	0.0460850867625645	4	0.0111169391409593	0.0346195986577557	0.0173097993288779	0.544463697521694	0.771547033981118	-0.0144467711062646	-0.0922585078519886	0.0187122602621706	-0.00189953291548151	4	-0.022473137902891	0.0484903106028377	0.0242451553014189	0.389734765586759	0.729582625492513	-0.00675736617530875	0.022074453138423	0.00339857646186492	0.0517989005802049	4	0.017628641001296	0.0257199272164758	0.0128599636082379	0.219498185029135	0.531146453717842	-0.0589307044873917	-0.183171111538729	-0.0658691308540155	-0.0577154978562872	4	-0.0914216111841059	0.0612716931923844	0.0306358465961922	0.0245051445803095
A0A1B0GVH5	-0.170539044882478	NA	-0.118162729506702	0.28691230784477	3	-0.000596488848136387	0.250363337441683	0.144547340267169	0.996255404217946	0.998567668087152	-0.0193364850975993	NA	-0.296363809950655	0.168122758808327	3	-0.0491925120799757	0.233678154519742	0.134914145415708	0.681150865696539	0.846328840795892	-0.135544670711878	NA	-0.0853455550377862	-0.12691211248222	3	-0.115934112743961	0.0268398055563955	0.0154959689629822	0.000291465485841511	0.0231868464131286	0.0658879356564572	NA	-0.137333404648165	-0.165678030342126	3	-0.0790411664446114	0.126309888481857	0.0729250481163118	0.251740005122921	0.566227704975142	0.0290219700362755	NA	-0.505689731062748	0.146156835509363	3	-0.110170308505703	0.347500869628038	0.200629720623377	0.540612500446305
A0A1B0GVU9	NA	NA	NA	NA	0	NA	NA	NA	NA	NA	NA	NA	NA	NA	0	NA	NA	NA	NA	NA	NA	NA	NA	NA	0	NA	NA	NA	NA	NA	NA	NA	NA	NA	0	NA	NA	NA	NA	NA	NA	NA	NA	NA	0	NA	NA	NA	NA
A0A1B0GW05	NA	NA	NA	NA	0	NA	NA	NA	NA	NA	NA	NA	NA	NA	0	NA	NA	NA	NA	NA	NA	NA	NA	NA	0	NA	NA	NA	NA	NA	NA	NA	NA	NA	0	NA	NA	NA	NA	NA	NA	NA	NA	NA	0	NA	NA	NA	NA
A0A1B0GW68	0.0542203909978864	-0.0688533202500154	0.171797636722025	0.0338147129922438	4	0.0477448551155349	0.098691790518803	0.0493458952594015	0.370633088782439	0.674278299089471	0.00957191522181022	0.0367504774308457	0.0231100256985786	0.114229750813125	4	0.0459155422910898	0.0468749411216936	0.0234374705608468	0.0978217840365282	0.355854696922292	0.0551252192376558	-0.0366350016286522	0.0734354466030104	0.0374747054186629	4	0.0323500924076692	0.0482766941328531	0.0241383470664266	0.228700281488642	0.612586573849072	-0.102427812924198	0.0803421083176034	-0.0102440314968031	-0.120590140813588	4	-0.0382299692292466	0.0926410839081382	0.0463205419540691	0.440754278190948	0.714423690601198	0.218071069203193	-0.0545726224286231	0.243791434851134	0.144558281283885	4	0.137962040727397	0.135068407371986	0.067534203685993	0.0871003706504351
A0A1P0AYU5	0.0765154306882395	0.0785079581897067	-0.0610672894731557	0.0319567667716614	4	0.031478216544113	0.0653326027631631	0.0326663013815816	0.372445345268272	0.674278299089471	0.0523911977284386	0.00895689376889422	-0.0525290511409523	0.0302986005330386	4	0.00977941022235478	0.0451657041579436	0.0225828520789718	0.680115523410408	0.846086101757063	0.0639030518673132	0.0274004372519144	-0.0227798686562928	0.0448542357842605	4	0.0283444640617988	0.0372002433304684	0.0186001216652342	0.17837317221215	0.567406783028658	-0.00224894050356217	-0.0616768965548244	-0.0309529283289121	-0.0257477691976516	4	-0.0301566336462376	0.0244433936631818	0.0122216968315909	0.0486244419159882	0.266045712343493	0.173867870911768	0.0758656288294169	-0.0532874083136463	0.057195401581543	4	0.0634103732522703	0.0931181870455753	0.0465590935227876	0.222132510941361
A0A1W2PNP0	0.0648241589202996	0.149503587851276	0.060058413490702	0.0188837125463602	4	0.0733174682021594	0.0548187845432064	0.0274093922716032	0.0367852473371689	0.225874696712846	-0.095957766700512	-0.0669919594644044	-0.0542557958604205	-0.0872377191400459	4	-0.0761108102913457	0.0189605280817333	0.00948026404086665	0.000199509504228631	0.0177870541656851	-0.0958999179131098	0.0481291708742791	0.0947564510167916	0.0113449735940093	4	0.0145826693929926	0.0811789952172191	0.0405894976086096	0.731696973862442	0.916383231997601	-0.129212794012251	-0.10544929858373	-0.0840642647884744	-0.0697089718114043	4	-0.0971088322989649	0.0259559937317567	0.0129779968658783	0.000294301189505266	0.0167862735070645	-0.0580056034355656	0.115352379013689	0.236978222467642	0.136538832947766	4	0.107715957748383	0.122558070570781	0.0612790352853904	0.129289077939681
A0A1W2PNW1	0.19279854797508	0.0453834026473282	0.0819510193395443	0.0522637500920201	4	0.0930991800134932	0.0683339183833843	0.0341669591916921	0.0344213194029816	0.21952668471564	0.0106315517298868	-0.0696835554706704	0.0132510234978562	0.0425918767244679	4	-0.000802275879614879	0.0481522266550718	0.0240761133275359	0.974498293176128	0.989888555198735	0.0874628412503393	-0.0719861128257274	0.0187122602621706	-0.0660298703351972	4	-0.00796022041210367	0.0759130666484269	0.0379565333242134	0.840826481635755	0.955174769191795	0.124781624710026	-0.0208046151392962	0.0567143909943214	0.0252962946157558	4	0.0464969237952016	0.0611333374786748	0.0305666687393374	0.179037241928599	0.485407697175027	0.0769735188988228	0.00647675629145292	0.240388850630294	0.0891258904729838	4	0.103241254073388	0.0984243680414877	0.0492121840207438	0.0807139388539389
A0A1W2PNX8	0.0683414992425392	0.0601993997767689	0.00611960637989825	-0.214809249917384	4	-0.0200371861295444	0.132751693488953	0.0663758467444767	0.772937537247322	0.91364892310935	-0.00320480333391687	0.0553982386590909	0.00664072537702959	-0.129958594124668	4	-0.017781108355616	0.0790525137148619	0.039526256857431	0.668610229695451	0.839613202748928	0.0168890137051457	0.0398733827320791	0.0112564553431234	-0.0760001590901254	4	-0.00199532682744433	0.0508656140775353	0.0254328070387677	0.940017298572282	0.987034488914209	-0.00224894050356217	0.00317424779514364	0.0269670476002694	-0.165678030342126	4	-0.0344464188625689	0.0884031332155016	0.0442015666077508	0.465418692569207	0.734728144275119	0.0895515849782922	-0.0328272420153698	-0.0182237586189073	-0.17257945488829	4	-0.0335197176360688	0.107577262059403	0.0537886310297015	0.556100919255851
A0A1W2PNZ9	0.438179579091287	-0.40292197800959	-0.0934160671710161	0.170136184205024	4	0.0279944295289262	0.360039624827936	0.180019812413968	0.881521069023591	0.95796303089995	0.191577600985896	-0.382882261131828	0.113555929293541	-0.186226813771413	4	-0.0659938861559509	0.266742951355949	0.133371475677974	0.63832710055131	0.824486607942039	0.139403056665416	-0.122053110112342	-0.257020035306216	-0.238938730216331	4	-0.119652204742368	0.18276997277372	0.0913849863868602	0.238328439754127	0.619376925000527	0.8854588074237	0.143557403321265	-0.344216162089147	0.10180228052286	4	0.19665058229467	0.509512411424966	0.254756205712483	0.469465574588324	0.736969793282428	0.423452321531731	-0.0886804767488873	0.110360447442506	0.0262793247988489	4	0.117852904256049	0.219460625680533	0.109730312840267	0.324095346978631
A0A1W2PPS1	-0.0297729233201317	0.0875758387080741	-0.219839429976742	-0.255073120131111	4	-0.104277408679978	0.1617122075688	0.0808561037843999	0.244644157357466	0.55828102086381	0.245679273872364	0.599436399457616	-0.165563579296988	0.0089775961192573	4	0.172132422538062	0.330986361789317	0.165493180894658	0.338371352926536	0.630783190469244	0.181494390154449	0.369645596464829	-0.0913526214856594	0.0151068923902083	4	0.118723564380957	0.20146998232664	0.10073499116332	0.283186153025783	0.659277874981526	-0.0643346417521238	0.302734529654052	0.0874628412503395	-0.12244093650153	4	0.0508554481626843	0.189810051256405	0.0949050256282027	0.611329964374637	0.821834282804593	0.32334876958699	0.651043617379882	-0.271510187901139	-0.186596033269591	4	0.129071541449035	0.43600849725758	0.21800424862879	0.575425898237856
A0A1W2PPT5	0.306373946180479	0.125050544126737	0.0303417080452137	-0.0601614352167701	4	0.100401190783915	0.156759959360081	0.0783799796800403	0.247490946697113	0.560423319749342	0.0778901831935791	-0.0154852474974187	-0.0839311502800862	-0.0644578504837531	4	-0.0214960162669197	0.0722440566019545	0.0361220283009772	0.573523529564401	0.786085522643349	0.0386804681640595	0.0460696486959847	0.0224257630612349	-0.0191088229477046	4	0.0220167642433936	0.0291416167515973	0.0145708083757987	0.181533143337965	0.569152329003849	0.0134205157623216	-0.00796630981005678	0.023623604525899	-0.00853163362111692	4	0.00513654421426172	0.0160093665552109	0.00800468327760544	0.544792195648636	0.78724034772745	0.0202889225411785	0.198313828029088	0.300440318946561	0.222392421336448	4	0.185358872713319	0.118365454289984	0.059182727144992	0.0202736083936504
A0A1W2PPZ5	0.0800044167681193	0.0491016908934383	0.0378284661072364	0.0740956175125105	4	0.0602575478203261	0.0200744269848707	0.0100372134924353	0.000961660427075167	0.0296642803168187	0.208299301859795	0.167069874761623	0.0522891222926124	0.0355799793690945	4	0.115809569570781	0.0849580363738492	0.0424790181869246	0.0343553123960659	0.215917067304173	0.0751109246950492	-0.133678435231969	0.00563920603686946	-0.0248911755417107	4	-0.0194548700104404	0.0868887765109227	0.0434443882554613	0.670004550567499	0.886740364223932	-0.220520978551145	0.0848435005525442	0.104969559601543	0.050156674972159	4	0.00486218914377508	0.151951372179051	0.0759756860895256	0.951051747546744	0.980235060632051	0.283031314399501	0.0881309102786649	0.119650209359765	0.0841309805525915	4	0.143735853647631	0.0942125155708787	0.0471062577854393	0.0224740734525042
A0A1W2PQ51	-0.0834013912906522	-0.113877244936011	-0.0901483533371051	-0.104431702144286	4	-0.0979646729270136	0.0137624663340812	0.00688123316704059	7.50954099200324e-06	0.00204766720316762	0.0306181679758665	-0.00643199924453228	-0.105252154693868	-0.0796043942376184	4	-0.0401675950500379	0.0630871770005725	0.0315435885002863	0.249983313218648	0.5509667667727	0.0335826005243807	-0.0322764030237561	-0.0478708496191233	0.0113449735940093	4	-0.00880491963112236	0.037770259377785	0.0188851296888925	0.657493127093736	0.880638778557539	-0.0643346417521238	-0.050115454846182	-0.0858687616352223	-0.0608089124881715	4	-0.0652819426804249	0.0149971646881826	0.0074985823440913	0.000126906358791441	0.0111327512193889	-0.0524674198941356	-0.0852331751304184	-0.108618778313353	-0.0339894279810237	4	-0.0700772003297326	0.0333045967083057	0.0166522983541529	0.00563399636462809
A0A1W2PQS6	-0.13235585099459	-0.0708696658485201	0.124764102878517	0.118544451767752	4	0.0100207594507899	0.13134913622619	0.065674568113095	0.8837296784423	0.958219088210571	-0.0654890815882595	0.0191257114871856	-0.0116953336323747	0.0754407562984749	4	0.00434551314125658	0.0588986905598075	0.0294493452799038	0.887524619440901	0.95310370322197	-0.0437816920279134	0.00636952487572728	0.00751405365730662	0.0411691889764045	4	0.00281776887038125	0.0350095760313365	0.0175047880156682	0.877399221577911	0.968609443626459	-0.0596429464274019	0.0484328603628594	-0.0431718341415736	0.0664954117869068	4	0.0030283728951977	0.0636442872632952	0.0318221436316476	0.927282043822353	0.970963230647068	-0.140794202149327	-0.0630242871438074	-0.0141540943098603	0.0469634789705867	4	-0.042752276158102	0.0793514259582215	0.0396757129791108	0.322642188373783
A0A1W2PQV2	0.0706816376970557	NA	0.238293048508932	-0.0019020372443746	3	0.102357549653871	0.123190674783977	0.0711241692481805	0.146043253602465	0.44866743459375	0.0482692090932519	NA	-0.0646598917260847	0.110897890115377	3	0.0315024024941813	0.0889717822903505	0.0513678824556146	0.49646327031824	0.743710835565926	0.0948235462015935	NA	-0.0285314844106853	-0.141495435626657	3	-0.0250677912785828	0.118197559918427	0.068241393036461	0.678946359446717	0.891003394207636	0.0829614490153987	NA	-0.169499741294535	-0.0679245621332215	3	-0.0514876181374526	0.127030677393759	0.073341195788627	0.439683440359138	0.713070300539525	-0.00534002475519868	NA	0.0239456956250324	-0.256683573681405	3	-0.0793593009371904	0.15426385394105	0.0890642775990945	0.335584357312485
A0A1W2PS43	-0.0769115241123302	-0.203940943283194	0.0963636770769904	0.386240234971409	4	0.0504378611632187	0.255472671013429	0.127736335506715	0.706601277013769	0.879709813813274	-0.0699625581675674	0.00128296588347318	0.161952753852655	0.31723757292855	4	0.102627683624278	0.172853514013576	0.0864267570067882	0.279923062537068	0.582878079893244	-0.131244533278253	-0.154843045230012	-0.0913526214856594	0.1323170770346	4	-0.061280780739831	0.131698228470089	0.0658491142350444	0.387959285059721	0.729582625492513	-0.0737640546720546	-0.027266865768993	0.104969559601543	0.315106829031348	4	0.0797613670479608	0.174210636091506	0.0871053180457529	0.395141575593507	0.682578847439527	-0.105958826658493	-0.253007788574532	0.0533295024061267	0.278859372995476	4	-0.00669443495785553	0.227791964976025	0.113895982488012	0.955038627499603
A0A286YFF7	-0.0185359514374278	-0.0932374788769746	0.134573626136523	0.175195318697033	4	0.0494988786297884	0.126543422804831	0.0632717114024154	0.463771544596087	0.743366044403359	0.0482692090932519	0.0504490226873575	0.112017054437352	0.168122758808327	4	0.0947145112565721	0.0571686055466805	0.0285843027733403	0.0161339985939046	0.151941052178734	-0.0903242779649436	-0.140698862909742	0.00751405365730662	-0.0210336998721968	4	-0.0611356967723939	0.0670900615274644	0.0335450307637322	0.118210772272109	0.481905613665698	-0.0904152952222185	-0.00956486403553405	0.151662795049584	0.0616131904071607	4	0.028323956549748	0.103045644918506	0.0515228224592528	0.602346496525957	0.820062248055359	-0.0178774907302559	-0.137828126077975	-0.0141540943098603	0.0941035666273691	4	-0.0189390361226806	0.0947580573419765	0.0473790286709882	0.703193534526448
A0A2Q2T6B6	NA	NA	NA	NA	0	NA	NA	NA	NA	NA	NA	NA	NA	NA	0	NA	NA	NA	NA	NA	NA	NA	NA	NA	0	NA	NA	NA	NA	NA	NA	NA	NA	NA	0	NA	NA	NA	NA	NA	NA	NA	NA	NA	0	NA	NA	NA	NA
A0A2Q2TH77	0.0255566327457428	0.176951646038767	NA	0.125530882083859	3	0.109346386956123	0.0769841926917695	0.0444468443739392	0.0322396720428797	0.211870714316577	-0.0422282353892976	0.159045328617208	NA	0.0873568892772524	3	0.0680579941683876	0.102015182234251	0.0588984929243736	0.225784102789548	0.524228373834719	0.322973147479882	0.376218250388316	NA	-0.0326372077923516	3	0.222184730025282	0.222282309779215	0.128334751387121	0.0933241056137133	0.446182533933346	0.0637394690778804	0.340869658540822	NA	-0.133595850638352	3	0.0903377589934504	0.238348445809885	0.137610539349266	0.468194011594429	0.736969793282428	0.556251204079629	0.373885392612542	NA	-0.131328726621972	3	0.2662692900234	0.356198623563121	0.205651371199142	0.182409649639503
A0A2Q3DP09	NA	NA	NA	NA	0	NA	NA	NA	NA	NA	NA	NA	NA	NA	0	NA	NA	NA	NA	NA	NA	NA	NA	NA	0	NA	NA	NA	NA	NA	NA	NA	NA	NA	0	NA	NA	NA	NA	NA	NA	NA	NA	NA	0	NA	NA	NA	NA
A0A2R8Y4J4	NA	NA	NA	NA	0	NA	NA	NA	NA	NA	NA	NA	NA	NA	0	NA	NA	NA	NA	NA	NA	NA	NA	NA	0	NA	NA	NA	NA	NA	NA	NA	NA	NA	0	NA	NA	NA	NA	NA	NA	NA	NA	NA	0	NA	NA	NA	NA
A0A2R8Y566	0.259961571784171	0.0247597305214769	NA	0.122041896003979	3	0.135587732769875	0.118184575150933	0.0682338962774529	0.0635542282767161	0.296131801521491	-0.122429978061703	0	NA	0.34444553144879	3	0.0740051844623622	0.242075940234984	0.139762609259	0.554621837448752	0.774800350111702	0.0997099015616193	0.0481291708742791	NA	0.195015982405143	3	0.114285018280347	0.0745201943834641	0.0430242542873562	0.0246795365239952	0.254719340768582	-0.27386143631815	0.0788385177272157	NA	-0.142957953842043	3	-0.112660290810992	0.178291266428723	0.102936510666783	0.247734570912373	0.562802714898989	-0.313292491389743	0.284777918778557	NA	0.719892080807265	3	0.230459169398693	0.518729683898197	0.299488722635273	0.399907361676123
A0A2R8Y595	0.0255566327457428	-0.264956717964822	-0.0231825294683002	NA	3	-0.0875275382291266	0.155578635582117	0.0898233671334898	0.296690790850981	0.613221274573906	-0.0204183711932113	-0.148584383217586	0.0377733426319251	NA	3	-0.043743137259624	0.095343243231967	0.0550464471453881	0.385830353307672	0.663051700122747	0.00911864461092279	0.00212630110838796	-0.138257086076229	NA	3	-0.0423373801189727	0.0831424422909817	0.0480023114377812	0.340055655661958	0.705845156137366	-0.0410272682600549	-0.0321326209408091	-0.105868635106823	NA	3	-0.0596761747692289	0.0402502948034369	0.0232385185397261	0.027805013018124	0.210663043493205	-0.055233854185512	0.020944014425611	-0.0616630198838045	NA	3	-0.0319842865479018	0.0459498348838284	0.0265291495393972	0.209144967678516
A0A2R8Y5A6	NA	NA	NA	NA	0	NA	NA	NA	NA	NA	NA	NA	NA	NA	0	NA	NA	NA	NA	NA	NA	NA	NA	NA	0	NA	NA	NA	NA	NA	NA	NA	NA	NA	0	NA	NA	NA	NA	NA	NA	NA	NA	NA	0	NA	NA	NA	NA
A0A2R8Y5P7	NA	NA	NA	NA	0	NA	NA	NA	NA	NA	NA	NA	NA	NA	0	NA	NA	NA	NA	NA	NA	NA	NA	NA	0	NA	NA	NA	NA	NA	NA	NA	NA	NA	0	NA	NA	NA	NA	NA	NA	NA	NA	NA	0	NA	NA	NA	NA
A0A2R8Y5S7	-0.0938462878879932	0.0601993997767689	-0.0294279722991986	0.0245009618526141	4	-0.0096434746394522	0.0671451406946126	0.0335725703473063	0.783588816925548	0.916225151270188	-0.0800788874005475	0	-0.0473611827820118	0.00359774510860439	4	-0.0309605812684887	0.0401431739392739	0.020071586969637	0.173891302205201	0.466921979718669	-0.0317088597273382	0.0232187095679472	0.00188218557797637	0.00189703517259759	4	-0.00117773235220425	0.0227020807433371	0.0113510403716686	0.920744619889154	0.985490190472167	0.0267173383757794	-0.0288869614371549	-0.0484403550577532	0.00339857646186492	4	-0.0118028504143159	0.0334118837114134	0.0167059418557067	0.506368940005134	0.763848954907944	0.00620514952670803	0.139125440773925	0.0120225282492131	0.0210616155278296	4	0.0446036835194189	0.0633102694443037	0.0316551347221519	0.208479802967993
A0A2R8Y5V9	-0.118960257625547	-0.091189650228116	0.0891753461074567	0.127272216080284	4	0.00157441358351948	0.124643009470923	0.0623215047354616	0.980664622549586	0.993481619962264	-0.130584109810144	0.107556829473403	0.401243699762471	0.135701281115949	4	0.12847942513542	0.217565449818633	0.108782724909317	0.282267332429644	0.583249587105137	-0.0861566437497146	-0.183554341871539	0.309063695096152	0.0919224894410393	4	0.0328187997289845	0.216623314312372	0.108311657156186	0.772118092625314	0.928323651704782	-0.0203677976939618	0.0345384187044788	0.193920482511291	-0.0171140208638476	4	0.0477442706644901	0.10064414417791	0.050322072088955	0.379367249314137	0.671638034777977	-0.0533889753651957	-0.196126766642642	0.191890332939104	-0.00708942478631919	4	-0.0161787084637633	0.160355073377076	0.0801775366885379	0.846751536370075
A0A2R8Y6Y7	0.0279671513364235	0.0247597305214769	-0.030993566637201	-0.00762324120302504	4	0.00352751850441857	0.0280722118918847	0.0140361059459424	0.809954619177463	0.92640666431081	0.0327060048683098	0.0504490226873575	-0.0234862519035448	-0.00903381186506125	4	0.0126587409467653	0.0346748013232292	0.0173374006616146	0.492814940343788	0.741183863014563	0.0220461060272576	0.0685642864830712	-0.0285314844106853	0.00189703517259759	4	0.0159939858180603	0.0407492584293577	0.0203746292146789	0.462316881088532	0.780337203534691	0.0267173383757794	-0.0127672960738779	0.0269670476002694	-0.0292157877928547	4	0.00292532552732903	0.0284216690443102	0.0142108345221551	0.843713622609765	0.932301647101833	0.0377024718012405	0.0588287744304665	-0.0956603525017211	-0.0213736507925668	4	-0.00512568926564522	0.0692458092789216	0.0346229046394608	0.887158513710492
A0A2R8Y738	NA	NA	NA	NA	0	NA	NA	NA	NA	NA	NA	NA	NA	NA	0	NA	NA	NA	NA	NA	NA	NA	NA	NA	0	NA	NA	NA	NA	NA	NA	NA	NA	NA	0	NA	NA	NA	NA	NA	NA	NA	NA	NA	0	NA	NA	NA	NA
A0A2R8Y761	-0.103048018659805	NA	0.156748049848731	0.079502351039454	3	0.0444007940761265	0.133407603902702	0.0770229160251682	0.52148196385698	0.776571417113128	0.0201334194970414	NA	-0.0559846097771715	0.140611195239756	3	0.0349200016532086	0.0991285019379353	0.0572318672782313	0.498551327761565	0.744992913407419	-0.0505327340189932	NA	-0.00755339443163505	-0.0384741478146357	3	-0.032186758755088	0.0221687697838864	0.0127991452023296	0.029902446243079	0.275594801807402	-0.1145411925763	NA	-0.0554951125917036	0.0648698397378648	3	-0.0350554884767128	0.0914352957258854	0.052790192600773	0.463358102047752	0.7337514628027	0.137180447936047	NA	0.112223191459695	0.197939377611909	3	0.14911433900255	0.0440866131508265	0.0254534179702886	0.000915522001453903
A0A2R8Y7B1	NA	-0.0528232104310665	0.147088649549972	-0.106476628129311	3	-0.00407039633680179	0.133628085269248	0.0771502110014944	0.952162418918516	0.986674176716864	NA	-0.0298275666565573	0.0745828667623871	-0.0588186444468836	3	-0.00468778144701795	0.0701640748425832	0.0405092474978065	0.895390581448409	0.957469305878508	NA	-0.222747109731815	0.0929916862207262	0.0411691889764045	3	-0.0295287448448948	0.169326298023493	0.0977605837447465	0.732836247483216	0.916383231997601	NA	-0.0224174661075973	0.079434467494405	-0.0102440314968031	3	0.0155909899633349	0.0556240985994471	0.0321145882998211	0.586906189308438	0.813839564906703	NA	0.0510177372615657	0.0725914045667596	0.107294013171909	3	0.0769677183334113	0.0283922330791785	0.0163922634111583	0.0024845718578439
A0A2R8Y811	-0.0730315709690473	-0.0588136482734494	-0.0578719503133489	-0.129164222837206	4	-0.0797203480982628	0.0336842152549097	0.0168421076274548	0.00321324722881721	0.0554909167533423	-0.0128621509370496	-0.00772184737773601	-0.0285691521967709	-0.089152377736782	4	-0.0345763820620846	0.0374490764505777	0.0187245382252888	0.114330571657002	0.388856806497473	0.0513468800002201	0.00636952487572728	0.0149891742194532	-0.0443347992358782	4	0.00709269496488061	0.0394381262760918	0.0197190631380459	0.73140197048189	0.916383231997601	0.0245096944241276	-0.0224174661075973	0.0517989005802049	-0.0396701454300211	4	0.00355524586667856	0.0420696064260024	0.0210348032130012	0.871337127404223	0.943197764390286	0.0710660141331139	-0.046170181432926	-0.128277304083821	-0.115919287299567	4	-0.0548251896708001	0.0913805344691693	0.0456902672345847	0.275391870200446
A0A2R8Y849	-0.151321129338336	-0.166806696872811	-0.062667616914998	-0.00571365119439365	4	-0.0966272735801347	0.0760155999943491	0.0380077999971745	0.0439443276448752	0.248770978409097	-0.0204183711932113	-0.0429909338973191	-0.0892319341033952	-0.0383281186590995	4	-0.0477423394632563	0.0293211477357606	0.0146605738678803	0.0173243353926293	0.157745379192525	0.0284666553020602	-0.122053110112342	0	0.0613214473730307	4	-0.00806625185931279	0.0800153618248265	0.0400076809124133	0.846877479385739	0.958125232104449	-0.0761310692159708	-0.00796630981005678	-0.0625845373780228	0.0435690149373992	4	-0.0257782253666628	0.0548221900364423	0.0274110950182211	0.383298585242044	0.672687354925632	-0.0992818790140846	-0.222392421336448	-0.177490278562497	-0.0818382920564612	4	-0.145250717742373	0.0661425268660269	0.0330712634330135	0.00460775263009524
A0A2R8Y855	0.0996175262666543	0.188797888886875	0.0526864248343496	0.307025272238308	4	0.162031778056547	0.111939690818757	0.0559698454093787	0.0275139770628121	0.194452238814239	0.309065943950313	-0.0777886051077257	0.0808897403732194	0.0267669095627853	4	0.0847334971946479	0.163414993347562	0.0817074966737809	0.339694644313239	0.631159747854284	0.0588936890535683	0.162814612279122	-0.0655007436409147	0.305125739322827	4	0.115333324253651	0.157228099760786	0.0786140498803929	0.192721593127701	0.580925316575829	0.112362365455958	0.180478779603053	0.125389100840475	0.237863830098888	4	0.164023518999594	0.0574011039287605	0.0287005519643802	0.00124318029275143	0.0404100432794363	0.138795103998141	-0.152183419055045	0.0219653314967916	0.184000186654035	4	0.0481443007734808	0.149989914791798	0.0749949573958991	0.544625468727201
A0A2R8YDQ0	NA	NA	NA	NA	0	NA	NA	NA	NA	NA	NA	NA	NA	NA	0	NA	NA	NA	NA	NA	NA	NA	NA	NA	0	NA	NA	NA	NA	NA	NA	NA	NA	NA	0	NA	NA	NA	NA	NA	NA	NA	NA	NA	0	NA	NA	NA	NA
A0A2R8YDR3	NA	NA	NA	NA	0	NA	NA	NA	NA	NA	NA	NA	NA	NA	0	NA	NA	NA	NA	NA	NA	NA	NA	NA	0	NA	NA	NA	NA	NA	NA	NA	NA	NA	0	NA	NA	NA	NA	NA	NA	NA	NA	NA	0	NA	NA	NA	NA
A0A2R8YDT1	NA	NA	NA	NA	0	NA	NA	NA	NA	NA	NA	NA	NA	NA	0	NA	NA	NA	NA	NA	NA	NA	NA	NA	0	NA	NA	NA	NA	NA	NA	NA	NA	NA	0	NA	NA	NA	NA	NA	NA	NA	NA	NA	0	NA	NA	NA	NA
A0A2R8YEA7	-0.379862863971504	0.15813733618508	0.0571141368751583	-0.0821267667135617	4	-0.0616845394062069	0.233873265790927	0.116936632895463	0.616771842651144	0.834228760776021	0.0451699704343655	0.0871608010438787	0.160464672193246	-0.0364796942667308	4	0.0640789373511899	0.0822446953412017	0.0411223476706009	0.170185284788217	0.462237300911751	-0.0518867416649687	0.272578178504665	0.195232450519776	-0.0600806040040108	4	0.0889608208388653	0.17035294292896	0.0851764714644801	0.336527960747006	0.705234969593024	0.0914230277635948	-0.0208046151392962	0.166897308744744	-0.258278637323683	4	-0.00519072898866007	0.185513515689863	0.0927567578449317	0.95719011157128	0.982875579918471	-0.249594148895086	-0.137828126077975	0.216343376663643	-0.00354035770524858	4	-0.0436548140036667	0.200406130243029	0.100203065121514	0.678317597719782
A0A2R8YEK8	0.121227079494632	0.0803260996286861	-0.0706959906709325	0.00189953291548151	4	0.0331891803419668	0.0851346612520633	0.0425673306260316	0.465209223156679	0.743366044403359	0.0657069014370603	0.0304806064547614	-0.0302674396687965	-0.0327899351176695	4	0.00828253327633893	0.0481780053051188	0.0240890026525594	0.74270272698742	0.882733903975151	0.0899205846741929	0.0169233030364685	0.00376191879619908	-0.0345802317101446	4	0.019006393699179	0.0520803295758151	0.0260401647879076	0.492958740849791	0.797286247242388	0.0464355729902847	-0.0370148423205552	0.0319677286586358	-0.0119584643080549	4	0.00735749875507758	0.0386211098728271	0.0193105549364135	0.716322390936527	0.87789991327008	0.193422182750244	0.0447383147652844	-0.0658691308540155	-0.119756244457224	4	0.0131337805510724	0.138328080190555	0.0691640400952773	0.855654274195094
A0A2R8YEL6	0.0399596978727167	0.197200329882572	-0.167244479029185	0.181913351981378	4	0.0629572251768703	0.169010337106771	0.0845051685533857	0.484414527993931	0.752897232969487	-0.0204183711932113	0.341307110745471	-0.0998922907918574	0.09412217736455	4	0.0787796565312382	0.192284485963181	0.0961422429815907	0.443876572867196	0.705859484364826	0.0984898633993632	0.134017347971687	-0.0227798686562928	0.161463422694116	4	0.0927976913522185	0.081249853236134	0.040624926618067	0.0624341508457248	0.379379732750963	0.342455497143944	0.248930662197102	-0.109534952304593	0.0369511361728915	4	0.129700585802336	0.204382457268193	0.102191228634096	0.251380048006606	0.566227704975142	0.0920540921814624	0.408531535419434	0.0934866288781095	0.222392421336448	4	0.204116169453863	0.149350223341337	0.0746751116706684	0.0340326635885509
A0A2R8YFH0	0.142517722799337	-0.126404342812174	0.0045921366333045	0.0113598621645478	4	0.0080163446962539	0.109821743827268	0.0549108719136339	0.888711878600716	0.960177272698343	-0.108557803480145	-0.0206841541717378	0.164924320383946	-0.0272729301501037	4	0.00210235814548974	0.115670214351298	0.0578351071756488	0.972181786448195	0.989713724066933	-0.0737254942009017	-0.0742245850217269	0.208333063045403	0.198328716445979	4	0.0646779250671882	0.160154869296167	0.0800774346480833	0.450094038763731	0.772729238794042	0.155369944543448	-0.056710643661475	-0.0590354702969522	0.18347153328026	4	0.0557738409663203	0.131732078736577	0.0658660393682887	0.429593789284447	0.704232025465002	-0.202833644587912	-0.0163202536863659	0.378356835952376	0.0503821891980511	4	0.0523962817190372	0.242293635220821	0.121146817610411	0.680489123710239
A0A2R8YG42	0.159106963165722	0.175251357048927	-0.0231825294683002	-0.100350525332469	4	0.0527063163534699	0.13604398596061	0.0680219929803049	0.467859778906308	0.743366044403359	0.130502024234128	0.0404993622797525	-0.108836492042906	-0.0254386069012237	4	0.00918157189243754	0.101367773225169	0.0506838866125847	0.862211458650498	0.941982377846208	0.0614005446641431	0.134017347971687	-0.0556797728298875	0.353471877088244	4	0.123302499223547	0.172200712520788	0.0861003562603941	0.202089867875107	0.58968887122244	0.0744499491598812	0.0863408489390465	-0.00853163362111692	0.00170028898983932	4	0.0384898633669125	0.0488103081746186	0.0244051540873093	0.165841701362451	0.468998600015719	0.0642848263678621	0.128772894776011	-0.0325586746912815	0.290470663365765	4	0.112742427454589	0.135775367317403	0.0678876836587013	0.147836289897805
A0A2R8YGH5	0.15470178404572	0.253074774637347	NA	-0.129164222837206	3	0.0928707786152873	0.198479136742358	0.114591983026725	0.377198971642412	0.678733625758935	0.496209692030572	0.0967948604902591	NA	-0.106499621300679	3	0.162168310406717	0.306626637883178	0.177030971922563	0.323484084294365	0.618554986081356	0.174563896245833	0.253070019615451	NA	-0.00189953291548151	3	0.141911460981934	0.130583323307202	0.0753923168630891	0.0742967889955672	0.410601815600731	0.0551134640622819	0.110089451711655	NA	-0.0309529283289121	3	0.0447499958150084	0.0710900087738155	0.0410438357022552	0.249302517893761	0.564948659364947	0.672843332714935	0.496282023972269	NA	-0.00531379989646785	3	0.387937185596912	0.351821299994566	0.203124122258507	0.0712959895562557
A0A2U3TZM0	0.0219332862428659	0.114442444560756	-0.0420005576704669	-0.0601614352167701	4	0.0085534344790962	0.078885871842116	0.039442935921058	0.835506233283834	0.934419290868305	0.0534198573377148	0.0267055627633801	-0.00834412413273689	-0.0199495893442448	4	0.0129579266560283	0.0334805780025033	0.0167402890012517	0.46829080238015	0.725014210259963	0.0143035380294979	0.012711051749554	-0.03623614913572	0.0244689955938996	4	0.00381185905930787	0.0272019068470664	0.0136009534235332	0.788687152821843	0.936741531440398	-0.0410272682600549	-0.0208046151392962	0.0252962946157558	-0.0309529283289121	4	-0.0168721292781268	0.0292994883907969	0.0146497441953985	0.293260041333192	0.602221551595072	0.0642848263678621	0.0588287744304665	0.0318400794319072	0.0175726294479498	4	0.0431315774195464	0.0221706990063364	0.0110853495031682	0.00806867949897452
A0A2Y9D025	-0.00245774342385363	-0.124308924809981	-0.0107721730188747	0.0632209802885122	4	-0.0185794652410492	0.0778693248028741	0.038934662401437	0.650107300274699	0.851505359068637	0.00638832796254746	-0.0245956659421323	0.130376093799274	-0.00722251841823834	4	0.0262365593503628	0.0705748301161554	0.0352874150580777	0.485257441386828	0.735304884868361	0.00781950445929924	-0.0257630960650818	0.0187122602621706	-0.0152667566533105	4	-0.00362452199923059	0.0204577261100919	0.010228863055046	0.735202893437236	0.918775670467452	0.0442579196849145	0.0267610681127595	0.0762105666201186	0.0435690149373992	4	0.047699642338798	0.0206575590002785	0.0103287795001393	0.00362244760805281	0.0720438099943662	0.0316316090491107	-0.175819783322284	0.0494460679188986	0.00529429966951306	4	-0.0223619516711903	0.103900385963324	0.0519501929816618	0.681900890540579
A0A3B3IRL5	-0.0795039687288546	0.123287935427477	-0.175878227362989	0.028233680728944	4	-0.0259651449838557	0.129813112636756	0.0649065563183779	0.702981101252681	0.877924517549767	-0.117791083258183	-0.0509469928890846	-0.123263562678186	-0.139846878489116	4	-0.107962129328642	0.0391497348230579	0.0195748674115289	0.0014933756479811	0.0460660671821109	-0.285157216731934	0.321076696195855	-0.0304537965417139	-0.0114348950622836	4	-0.00149230303501922	0.248632369687888	0.124316184843944	0.990811537922399	0.998695086034424	0.161410546700748	0.0173725639981195	-0.144837687060266	-0.0985638344835895	4	-0.0161546027112469	0.136630976078079	0.0683154880390397	0.82093358352983	0.923588471533561	-0.231750476034682	0.0619413862978022	0.00802614053891776	0.144558281283885	4	-0.00430616697851917	0.161691436386624	0.0808457181933121	0.959250714501464
A0A3B3IRM4	NA	0.0546612162353389	0.126169553589658	0.0522637500920201	3	0.0776981733056724	0.0419945590636831	0.0242455699799171	0.0122443147020666	0.128631946254433	NA	0.137036707683448	0.0934213721818396	0.107558316770245	3	0.112672132211844	0.0222528133953334	0.0128476678040222	0.000136346239640222	0.0147205243725854	NA	0.0563379841498118	0.00563920603686946	0.137503523749935	3	0.0664935713122054	0.0665161749835541	0.0384031315322192	0.0932997454913049	0.446182533933346	NA	0.022074453138423	-0.0136749368970766	0.0681191542665708	3	0.0255062235026391	0.0410048914545118	0.0236741851193538	0.254220145414785	0.568422706796519	NA	0.313791045449024	0.0802247294691871	0.0486738467356896	3	0.147563207217967	0.144819319161994	0.0836114729020358	0.0886870244657685
A0A3B3IRT8	-0.0436269324002582	-0.206155364348636	0.0318421710415052	0.108000957526282	4	-0.0274847920452767	0.134238368817709	0.0671191844088544	0.696395934895656	0.874155812432171	-0.106258687390557	-0.0429909338973191	0.0312747053331833	0.0513090938255769	4	-0.0166664555322791	0.0722005918400706	0.0361002959200353	0.660581729706397	0.836370608494951	-0.125530882083859	-0.0945286814768157	-0.0381687616697193	0.06313958881201	4	-0.048772184104596	0.0829100561892547	0.0414550280946273	0.28394965042208	0.659277874981526	-0.1145411925763	-0.0143711817764677	-0.0732844260352317	0.00339857646186492	4	-0.0496995559815335	0.0542469342442114	0.0271234671221057	0.116608570283718	0.402406059323835	-0.0803734164640201	-0.216723671249756	-0.0470374561236439	0.0503821891980511	4	-0.0734380886598422	0.110464642242061	0.0552323211210305	0.231957566044528
A0A3B3IS71	0.0892673380970873	NA	0.0106923361697224	-0.0210616155278296	3	0.0262993529129933	0.0567961594714891	0.0327912779598011	0.381784832944469	0.682113209214616	0.117773719391206	NA	0.0231100256985786	0.15038117642106	3	0.0970883071702814	0.0661090096780938	0.038168054533507	0.0287405822969012	0.199356773297071	0.279492828566966	NA	-0.00944793842141167	-0.0423786022705518	3	0.0758887626250007	0.177093390352269	0.102244916591586	0.415636653449958	0.754179140685479	-0.104842365857498	NA	0.0681191542665708	0.050156674972159	3	0.00447782112707723	0.0950991068693994	0.0549054949507407	0.926134516059261	0.970963230647068	0.267616975009538	NA	0.117797036284287	0.184000186654035	3	0.189804732649287	0.0750784461451337	0.0433465610922318	0.003371566385157
A0A3B3ISP1	0.205632094788872	0.0601993997767689	-0.0467436689264859	-0.179938790070331	4	0.00978725889220582	0.163389415355804	0.081694707677902	0.908550152346735	0.96840072822196	-0.178084533414073	0.0467259366446403	0.396194893066847	-0.232030503384538	4	0.00820144822821899	0.285445211892813	0.142722605946406	0.956041314990593	0.986323352536948	0.15357038859201	0.0685642864830712	0.0463333025478348	-0.223341875165312	4	0.011281525614401	0.163099358755971	0.0815496793779857	0.894498398103413	0.976449821970447	0.58944989171347	0.242229790694498	0.237863830098888	-0.146719872638242	4	0.230705909967153	0.300738813292713	0.150369406646356	0.175862919640241	0.481440368222165	-0.0359792971055666	0.241507345132408	-0.254608127990719	-0.141043881455183	4	-0.0475309903547652	0.212369334518568	0.106184667259284	0.670130874705001
A0A3B3ISS6	-0.0135696985440784	-0.244330067374865	0.167708748654146	0.269671857755938	4	0.0448702101227855	0.225593373688746	0.112796686844373	0.704546767970802	0.877924517549767	-0.0160956861888317	-0.0982527076674412	0.131895519996475	0.156857932712513	4	0.0436012647131788	0.121530824333448	0.0607654121667239	0.500013738715193	0.746440262783224	-0.160157225193492	-0.325656679309529	-0.0853455550377862	0.0448542357842605	4	-0.131576305939136	0.15464914985727	0.0773245749286348	0.139728639001675	0.511037804454889	-0.119415166944771	-0.0783556377014548	-0.11874171642122	0.120702485866139	4	-0.0489525088003266	0.11472122863357	0.0573606143167852	0.426180150288328	0.703606821694988	-0.039627074120711	-0.19798710866817	-0.0679767938160067	0.0280143761695966	4	-0.0693941501088228	0.094714760719616	0.047357380359808	0.19318121656965
A0A3B3ISV5	NA	NA	NA	NA	0	NA	NA	NA	NA	NA	NA	NA	NA	NA	0	NA	NA	NA	NA	NA	NA	NA	NA	NA	0	NA	NA	NA	NA	NA	NA	NA	NA	NA	0	NA	NA	NA	NA	NA	NA	NA	NA	NA	0	NA	NA	NA	NA
A0A3B3ISW7	-0.0550618274625417	-0.00963727725903402	-0.095052703808123	0.0356702695707257	4	-0.0310203847397433	0.0565184616190687	0.0282592308095343	0.314419615277365	0.624090936955663	-0.0323729747744927	-0.138659169343125	-0.0927766411468073	-0.00541349618636433	4	-0.0673055703626973	0.0599750687500692	0.0299875343750346	0.0659422172055186	0.28847276537709	0.127489735121916	0.0294867645003806	0	0.0667690122127011	4	0.0559363779587493	0.0549717785699799	0.0274858892849899	0.0880404494653486	0.435591290889933	0.304747568581675	-0.0683252725641902	0.0468666050379743	0.035291912251201	4	0.0796452033266651	0.158753464543573	0.0793767322717865	0.354410794588824	0.652089976897148	-0.0160797396678617	-0.19798710866817	-0.191208559810278	0.0537928173607031	4	-0.0878706476964016	0.126526454235929	0.0632632271179645	0.21420245564895
A0A3B3ISZ0	0.370461113049721	0.0638797462647176	-0.0690867378092754	-0.0229916426262292	4	0.0855656197197335	0.197769015204248	0.0988845076021242	0.420116500655653	0.713476353111187	0.382937323037997	-0.056275512486276	0.034527683128271	0.0373361512729726	4	0.0996314112382412	0.193811251267731	0.0969056256338656	0.343540535522122	0.632538168474946	0.276259293315184	-0.105933444749065	-0.0933605481019058	-0.0660298703351972	4	0.00273385753225384	0.183109558889164	0.0915547794445819	0.977146894853398	0.99626140409505	0.171422349828815	-0.0224174661075973	-0.0714955912854187	0.130060540564373	4	0.0518924582500429	0.117109947911833	0.0585549739559164	0.409611091169237	0.696480962116223	0.133135883916442	-0.2705187997347	-0.179767619273563	-0.303918880463804	4	-0.155267353888906	0.199296147063543	0.0996480735317717	0.170207153743801
A0A3B3ITH3	NA	NA	NA	NA	0	NA	NA	NA	NA	NA	NA	NA	NA	NA	0	NA	NA	NA	NA	NA	NA	NA	NA	NA	0	NA	NA	NA	NA	NA	NA	NA	NA	NA	0	NA	NA	NA	NA	NA	NA	NA	NA	NA	0	NA	NA	NA	NA
A0A3B3ITT5	0.0881127201555953	-0.179804037401684	0.188038277729236	0.079502351039454	4	0.0439623278806503	0.157100409442071	0.0785502047210355	0.595962390912657	0.821168650369247	0.108895568044753	0.066472284817518	0.0116012862787634	0.0425918767244679	4	0.0573902539663755	0.0410321101642132	0.0205160550821066	0.0312736449953229	0.208698076867243	0.111853870917059	-0.0279309327477919	-0.00377175388920842	0.068580305659524	4	0.0371828724848956	0.0644945627427465	0.0322472813713733	0.292745556635626	0.666017970294138	0.122719158253133	0.143557403321265	-0.131730698418789	0.0152309395493007	4	0.0374442006762276	0.126023021202519	0.0630115106012597	0.574056357393894	0.807532094778178	0.155640775436065	-0.0596376775114798	-0.0658691308540155	0.082462160191973	4	0.0281490318156356	0.109163458250555	0.0545817291252776	0.624493463646442
A0A3B3ITX4	-0.0423619651636805	0.0209780899790503	0.0848450926087239	0.142850358283885	4	0.0515778939269947	0.0799966965683334	0.0399983482841667	0.244698098790787	0.55828102086381	-0.0722045089542371	-0.152859038317912	-0.0490817495224835	0.0495698590870401	4	-0.056143859426898	0.0833407342770368	0.0416703671385184	0.226524637785565	0.525544113603808	-0.00786211777297044	-0.0106787685260268	-0.0873451326841347	0.072196084597029	4	-0.00842248359652572	0.0651499370890564	0.0325749685445282	0.804618147362437	0.941445293727359	-0.0503050818480656	0.0314325078366572	-0.0502008129221906	-0.0222880672017846	4	-0.0228403635338459	0.0385086766882876	0.0192543383441438	0.280364946388275	0.595190620428685	-0.0106998886572088	-0.172158118816311	0.00401865173739308	0.0907870248429047	4	-0.0220130827233056	0.109655575461424	0.054827787730712	0.70196491407108
A0A3B3IUA2	-0.229778248257154	-0.130604331341459	0.0273360922895941	0.188600247108621	4	-0.0361115600500996	0.183445424047014	0.0917227120235069	0.70741007686088	0.880041424835572	0.0243364670171999	-0.0245956659421323	-0.195738693236103	0.0267669095627853	4	-0.0423077456495626	0.104988146187309	0.0524940730936547	0.451022522562121	0.712795880120496	-0.0197362180612624	-0.060845555220527	0.0499764737790214	-0.0038015701598561	4	-0.00860171741565602	0.0458542676695282	0.0229271338347641	0.720434046246183	0.912006751173456	0.0311225174957805	0.110089451711655	0.0336307778812802	0.130060540564373	4	0.0762258219132723	0.051295120628345	0.0256475603141725	0.0248913852346827	0.195445863803756	0.255016938229905	0.0273276312164651	0.0494460679188986	0.249415595102994	4	0.145301558117066	0.123805384589809	0.0619026922949043	0.0572727511644313
A0A3B3IUB5	-0.0847028754031737	-0.132708919666383	0.0152506181320267	0.00947275262028235	4	-0.0481721060793118	0.0726322739093581	0.036316136954679	0.232937860384768	0.545869110033452	-0.0845979045359642	-0.0982527076674412	-0.0681446640505604	-0.0291095886297208	4	-0.0700262162209216	0.0299264630482677	0.0149632315241339	0.00339633257918464	0.0720640704731994	-0.0696054674858668	-0.117429083586895	-0.0596001422012304	-0.0561280123785105	4	-0.0756906764131256	0.0284061467318086	0.0142030733659043	0.00177953840140625	0.0618338458327713	0.0808382771224287	-0.0321326209408091	-0.0379224831437538	-0.0786642770458846	4	-0.0169702760020047	0.068414312628405	0.0342071563142025	0.637468618121127	0.833146404055412	-0.133954456668864	-0.224286965326225	-0.0553767570363734	0.0639765893467946	4	-0.0874103974211669	0.122264355901064	0.0611321779505321	0.202697897318942
A0A3B3IUB9	-0.206923195376667	0.0491016908934383	0.0659290016152019	-0.0346263431096325	4	-0.0316297114944148	0.124862654047996	0.062431327023998	0.630487481799217	0.841717029155046	-0.02475404700601	-0.0154852474974187	0.0132510234978562	-0.0777023569932438	4	-0.0261726569997041	0.0379726644731956	0.0189863322365978	0.217242172456867	0.516935312005766	0.0155968550510185	0.0665337512557004	-0.119721134638801	0.0466932354480415	4	0.00227567677898979	0.0839894744203828	0.0419947372101914	0.958543419874036	0.993008049123194	0.0134205157623216	0.0391847835608438	-0.0768687633842705	-0.00511292339365252	4	-0.0073440968636894	0.0497820691980563	0.0248910345990282	0.777899023056409	0.90168280164859	-0.313292491389743	0.0743251107536346	0.117797036284287	-0.108275851985764	4	-0.0573615490843963	0.196735710939737	0.0983678554698683	0.581043736843909
A0A3F2YNW8	-0.0135696985440784	0.0379179524007625	-0.0372729891334822	-0.0983142581759503	4	-0.0278097483631871	0.0565194612394132	0.0282597306197066	0.363080573823648	0.669203644772814	0.0337487913545401	-0.0429909338973191	-0.0133738620833715	-0.0758028240777623	4	-0.0246047071759782	0.0465136653023698	0.0232568326511849	0.330797787629643	0.625391939965235	0.0488224785846735	0.0274004372519144	0.0279781562170223	0.0356239097307214	4	0.0349562454460829	0.00997500482550468	0.00498750241275234	0.000420616612668181	0.0281368132360454	-0.0203677976939618	-0.0850815008897681	-0.0786642770458846	-0.0608089124881715	4	-0.0612306220294465	0.0291132558653946	0.0145566279326973	0.00564577942174498	0.0914090049525234	0.0489096004809463	0.104827199150979	-0.0679767938160067	-0.0467164989070302	4	0.00976087672722199	0.0812466770822927	0.0406233385411463	0.818114037118063
A0AV96	-0.0499684592740848	-0.0608160011845971	-0.0610672894731557	-0.0463556356917396	4	-0.0545518464058943	0.0075249793161428	0.0037624896580714	6.74846338178057e-06	0.00204766720316762	-0.172060745786304	-0.00385575741549948	0.133413347638728	-0.0236066129523338	4	-0.0165274421288521	0.125011379796334	0.0625056898981668	0.800308355611262	0.912405396985623	-0.0861566437497146	-0.00853668195448543	0.127883230625387	-0.0345802317101446	4	-0.000347581697239509	0.0913697106069171	0.0456848553034586	0.994176214047522	0.998695086034424	0.0333200732000265	-0.0175843123716538	0.117569596381176	-0.0732844260352317	4	0.0150052327935793	0.0810596989208715	0.0405298494604357	0.723931129970009	0.882081340547899	0.257991568234016	-0.0344883763852907	0.0668397888123671	0.0907870248429047	4	0.0952825013759993	0.121303913594436	0.060651956797218	0.167245416417314
A0AVT1	0.00245356358608212	0.0209780899790503	-0.0216253841030059	-0.0346263431096325	4	-0.0082050184118765	0.0247887864408599	0.01239439322043	0.532561306842094	0.783638771919112	0.0368726360414183	0.010231922610956	-0.0336700238896364	-0.0476059322471102	4	-0.00854284937109309	0.0390399697801108	0.0195199848900554	0.676957206233675	0.843893457502846	0.0386804681640595	0.0315700790008696	-0.0420417708169257	-0.0114348950622836	4	0.00419347032142996	0.0379507358324511	0.0189753679162255	0.832424581651071	0.95066849653615	0.165423609207371	0.0697839166190268	-0.0590354702969522	-0.0274807364221071	4	0.0371728297768347	0.101567491575632	0.0507837457878158	0.491768884537426	0.753459443194031	0.0202889225411785	-0.042822859650815	0.0160078762003921	-0.0160004786937151	4	-0.00563163490073985	0.0296133070246555	0.0148066535123277	0.716790140513969
A0MZ66	-0.0448930097442503	0.423178870492513	-0.0594687352476784	-0.104431702144286	4	0.0535963558390745	0.247687957050138	0.123843978525069	0.680302917673532	0.866072184646562	0.151789661232087	0.226420763958738	0.0165448492228981	-0.0309485882935019	4	0.0909516715300555	0.118952629991011	0.0594763149955056	0.17708125591733	0.47052469132135	0.178033304829788	0.324479280416694	-0.0517700277788062	-0.0780025120012732	4	0.0931850113666009	0.192365453698167	0.0961827268490836	0.37004434702426	0.721307543570714	-0.100017294333518	0.101229474791427	-0.0326921630674488	-0.00682126585601406	4	-0.00957531211638834	0.0836648602416166	0.0418324301208083	0.826551541958818	0.925080595281304	0.23175321112758	0.303308201573423	-0.072201379677732	-0.104469266556029	4	0.0895976916168104	0.207943339654121	0.10397166982706	0.421923782435745
A1L0T0	-0.767992489786831	0.176951646038767	0.218664241759999	0.043068721891886	4	-0.0823269700240448	0.463207079271363	0.231603539635682	0.734403940770398	0.893401655110226	-0.405112285404383	-0.15714639672101	-0.0981100854498478	0.0582451410359534	4	-0.150530906634822	0.192519110479997	0.0962595552399986	0.168896365951927	0.462057659975273	-0.484642966764711	-0.0630667951372054	-0.109525367532913	-0.0268237880757101	4	-0.171014729377635	0.211807614725334	0.105903807362667	0.15747858276943	0.537918368036143	-1.16655815034391	0.0788385177272157	-0.152381207728669	-0.0466820427853945	4	-0.32169572078269	0.571115904325069	0.285557952162535	0.302962125727328	0.609616387285732	-0.471810556683961	0.192645077942396	-0.0223049354307245	-0.0321804057491497	4	-0.0834127049803599	0.278938283917218	0.139469141958609	0.571660059893512
A1X283	NA	NA	NA	NA	0	NA	NA	NA	NA	NA	NA	NA	NA	NA	0	NA	NA	NA	NA	NA	NA	NA	NA	NA	0	NA	NA	NA	NA	NA	NA	NA	NA	NA	0	NA	NA	NA	NA	NA	NA	NA	NA	NA	0	NA	NA	NA	NA
A2A274	0.0267623954911399	0.0857668164762	-0.0294279722991986	0.00758317141906417	4	0.0226711027718014	0.0480963167672999	0.0240481583836499	0.382208309192625	0.682455585215626	0.0544477840223762	0.0417468288865637	-0.0387889945146499	0.0089775961192573	4	0.0165958036283868	0.0415967123792313	0.0207983561896157	0.455318220401356	0.715837166769572	0.080064388929179	0.00848646588782864	0.0463333025478348	0.0226014289371326	4	0.0393713965754938	0.031302281704046	0.015651140852023	0.0455595240802299	0.334893158305732	0.0111924148702044	-0.00636952487572728	0.011860155210061	-0.0136749368970766	4	0.000752027076865398	0.0127964317893399	0.00639821589466997	0.910270412621968	0.96339099998201	0.140407954966443	0.257886272701335	0.0357711310218221	-0.0142138592197007	4	0.104962874867475	0.120599213198598	0.0602996065992992	0.132384168324933
A2A2F0	0.117836490293858	0.126811001991174	NA	-0.106476628129311	3	0.0460569547185739	0.132174149845424	0.0763107809931656	0.502990976336208	0.763767757467659	0.092976012958638	-0.0927671685837115	NA	-0.112328700102876	3	-0.03737328524265	0.113308728856254	0.0654188251066924	0.525063806180028	0.762742857319665	-0.108524456778169	-0.0106787685260268	NA	-0.139403056665417	3	-0.0862020939898708	0.0672026896752464	0.0387994909742704	0.0451283360046878	0.333552468807264	-0.139077413921807	0.0110794458804898	NA	-0.365976680827958	3	-0.164658216289758	0.189825218976392	0.109595641275	0.132483869594619	0.422021852249243	-0.190615970658694	0.113853474940272	NA	0.0418201756946271	3	-0.0116474400079316	0.159121023980248	0.0918685660287253	0.88547765729404
A2A376	0.031575394253272	0.100175875487708	0.10065954637782	0.00189953291548151	4	0.0585775872585704	0.0498090659021097	0.0249045329510549	0.0568960461939813	0.281437241219824	-0.136436836055582	0.0798928005798395	-0.11603199344711	0.073730388533372	4	-0.0247114100973702	0.117551192192931	0.0587755960964656	0.688808421158175	0.849212013524128	0.202088324881359	-0.207924770026292	-0.316757981698355	0.0374747054186629	4	-0.0712799303561562	0.234868090406336	0.117434045203168	0.566110087745819	0.83772061858295	-0.329250006184682	0.093804368124166	-0.129867954401599	0.035291912251201	4	-0.0825054200527285	0.189813464002847	0.0949067320014237	0.418079787115521	0.701170844263138	-0.0423689723946661	0.195482237245925	0.00802614053891776	-0.0106472441995084	4	0.0376230402976672	0.107275727289521	0.0536378636447605	0.509313993646094
A2ACR1	-0.0160506880478334	0.0601993997767689	-0.0852606184274728	-0.0821267667135617	4	-0.0308096683530247	0.068553698002995	0.0342768490014975	0.403361761563798	0.697867838343906	-0.0914030824410786	0.0367504774308457	-0.0611835164514906	0	4	-0.0289590303654309	0.058005867512611	0.0290029337563055	0.356593761506477	0.642631022437591	0.0335826005243807	0.0826985706867073	-0.0694479281575776	-0.052186220197136	4	-0.00133824428590637	0.071893665377819	0.0359468326889095	0.971510593870828	0.993614700339804	0.0744499491598812	-0.00318124724467991	0.00509486712276347	-0.0396701454300211	4	0.00917335590198593	0.0476654715678632	0.0238327357839316	0.713581477347158	0.877502097934605	-0.0214797274104516	0.12580132824472	-0.134890127155474	-0.150824902247769	4	-0.0453483571422435	0.127808393618247	0.0639041968091234	0.504563096646575
A2RRP1	NA	0.223763934930461	-0.116499680284057	0.0938220223565208	3	0.0670287590009749	0.171706846632984	0.0991349941252553	0.45572451328131	0.74067484067172	NA	0.137036707683448	0.220251394417322	0.0425918767244679	3	0.133293326275079	0.0888888954537674	0.0513200277182011	0.0267207785522723	0.193709624852564	NA	0.18357317244592	-0.138257086076229	-0.0780025120012732	3	-0.0108954752105274	0.17108826556849	0.0987778561811538	0.900254024643451	0.978474147512438	NA	0.0360888702678787	0.104969559601543	0.0336307778812802	3	0.0582297359169005	0.0404965293957252	0.0233806821478675	0.0309164144463351	0.218421825440915	NA	0.362570079384708	-0.221386708475302	-0.0249669155165751	3	0.0387388184642769	0.297145078923536	0.171556791304876	0.798028480890418
A2VDF0	NA	0.413115187147815	0.31424190174223	0.31315788525963	3	0.346838324716559	0.0574000056030697	0.0331399086864183	5.79273792655938e-05	0.00627964350701199	NA	-0.00128410782032506	0.034527683128271	0.0214531096663175	3	0.0182322283247545	0.0181218555948007	0.0104626582058737	0.0917343459578775	0.348383075164151	NA	-0.0475894585182602	-0.212694120417265	0.385794299197426	3	0.0418369067539668	0.309103385952943	0.178460923087356	0.790547357955337	0.937130714093725	NA	-0.239708699329088	-0.167587620350758	0.00170028898983932	3	-0.135198676896669	0.123920771680321	0.0715456908878193	0.0734801940985221	0.326421357708478	NA	0.295395777493837	-0.216702629552487	0.474779582970733	3	0.184490910304028	0.358833986313718	0.207172898592612	0.335838694430811
A3KMH1	0.146960205265433	0.135581211618906	0.00764546061085844	-0.0114500207435382	4	0.0696842141879149	0.0831576095751109	0.0415788047875554	0.144763721893555	0.446096566038957	0.258224527191477	0.0454827697940081	0.0666603040690801	-0.110383055787907	4	0.0649961363166646	0.151083434996117	0.0755417174980583	0.422611319006538	0.689079836762009	0.275179835695883	-0.105933444749065	0.0554240386186918	-0.310112344640166	4	-0.0213604787686642	0.247899339001497	0.123949669500749	0.868842590934239	0.964965491807101	0.282749251019676	0.26752919838099	0.192432400851882	-0.120590140813588	4	0.15553017735974	0.188266369469266	0.0941331847346331	0.149574545238046	0.448130674186929	0.112741212350182	0.295395777493837	-0.0806878455655607	-0.0669458239098263	4	0.065125830092158	0.177008496127148	0.0885042480635742	0.48957800868613
A4D1P6	-0.426955571951764	0.0983825936646569	NA	-0.208206515093137	3	-0.178926497793414	0.26389019804288	0.15235707687656	0.219374955987245	0.530353020441137	-0.731994452015937	-0.161446534154635	NA	-0.249053651226852	3	-0.380831545799142	0.307254441411993	0.177393434458922	0.0502825681961619	0.255899332755888	-0.314108590428063	-0.00853668195448543	NA	-0.137313707942689	3	-0.153319660108413	0.153413463198621	0.0885733042750367	0.0933664829120186	0.446182533933346	-0.352014897316776	0.376799515688848	NA	-0.173331602885562	3	-0.0495156615044967	0.37985576559563	0.219309828519869	0.798052860005709	0.912137396081415	-0.285957550113914	0.0273276312164651	NA	-0.229481846122767	3	-0.162703921673405	0.166977152945023	0.0964043042013265	0.0997237225506873
A5A3E0	NA	NA	NA	NA	0	NA	NA	NA	NA	NA	NA	NA	NA	NA	0	NA	NA	NA	NA	NA	NA	NA	NA	NA	0	NA	NA	NA	NA	NA	NA	NA	NA	NA	0	NA	NA	NA	NA	NA	NA	NA	NA	NA	0	NA	NA	NA	NA
A5PLN9	-0.0525128956318465	-0.19072532377903	0.0790511288337495	-0.0901978089715783	4	-0.0635962248871764	0.111565466239662	0.0557827331198308	0.297713892393582	0.613221274573906	0.164222642078129	-0.0272092446295437	-0.0370806520522884	-0.0720112449153881	4	0.00698037512022715	0.106575655081327	0.0532878275406636	0.900062030827743	0.960079689148002	0.081300102101848	0.0481291708742791	0.0698511092539716	-0.112474729258413	4	0.0217014132429215	0.0905024134661976	0.0452512067330988	0.648508898728079	0.874806961559564	-0.061986886895701	0.0126553008060289	-0.100386570090407	-0.0858687616352223	4	-0.0588967294538254	0.0502597901022476	0.0251298950511238	0.0575526420959934	0.287270908616381	0.172292015986229	-0.186860870687791	-0.11078987735498	-0.115919287299567	4	-0.0603195048390273	0.158912377536666	0.0794561887683329	0.476515802996928
A5YKK6	0.0158740793484036	0.0133849406568199	0.0790511288337495	0.0485927683635231	4	0.039225729300624	0.0310206908476893	0.0155103454238446	0.0447397912910086	0.251859197528341	0.00319769995904945	0.066472284817518	0.0918608581942226	0.0460850867625645	4	0.0519039824333386	0.0374831022116198	0.0187415511058099	0.0324456082378381	0.211903899667968	0.00521770927101928	-0.00426202685415955	0.0859109601500705	0.0667690122127011	4	0.0384089136949078	0.0446587237607532	0.0223293618803766	0.136204102986671	0.503953915906578	0.0658879356564572	0.0530347623218681	0.0386084540356654	0.035291912251201	4	0.0482057660662979	0.0140813629172568	0.00704068145862838	0.000477403960019245	0.0220441552324582	-0.0142842260062476	0.071239130879892	0.179506608483272	0.157297393114563	4	0.0984397266178698	0.088473397403815	0.0442366987019075	0.0677027312658792
A6NC86	NA	NA	NA	NA	0	NA	NA	NA	NA	NA	NA	NA	NA	NA	0	NA	NA	NA	NA	NA	NA	NA	NA	NA	0	NA	NA	NA	NA	NA	NA	NA	NA	NA	0	NA	NA	NA	NA	NA	NA	NA	NA	NA	0	NA	NA	NA	NA
A6NDG6	0.0339758857237144	0.107326794915706	-0.15524338155899	-0.108524456778169	4	-0.0306162894244347	0.122204798380932	0.061102399190466	0.634173356749608	0.843856498314419	0.00851149985551747	0.0578664942498406	-0.150709445079856	-0.0929893348944384	4	-0.044330196467234	0.0947288494452299	0.0473644247226149	0.385428006888432	0.663051700122747	0.140588995935559	0.124289091009807	0.0149891742194532	-0.14359085362885	4	0.0340691018839924	0.130911213804278	0.0654556069021391	0.621361362698008	0.861245024959228	0.124781624710026	0.0728084356321959	-0.0732844260352317	-0.0136749368970766	4	0.0276576743524783	0.0882597404645	0.04412987023225	0.553916280178343	0.793440752941683	0.0685268024933662	0.18695396586454	-0.0223049354307245	-0.0558764981925061	4	0.0443248336836689	0.108641056823116	0.0543205284115581	0.445685491009905
A6NFX8	-0.0691620245073955	0	0.0467615908772442	0.0632209802885122	4	0.0102051366645902	0.0593024594953726	0.0296512297476863	0.74245824795994	0.899219264255969	-0.138784590912005	0.00895689376889422	0.173802471730399	0.0720179906576859	4	0.0289981913112434	0.130858318269891	0.0654291591349457	0.673154179819775	0.841174872574187	-0.132676488771385	-0.0128240403575836	0.173686920238511	0.06495544184077	4	0.0232854582375783	0.129080094139426	0.0645400470697128	0.730618138791654	0.916383231997601	-0.061986886895701	-0.0127672960738779	0.154722594798642	-0.0361769353919245	4	0.0109478691092846	0.0979350237649069	0.0489675118824534	0.830506556184398	0.925624477205684	-0.00534002475519868	-0.0295107002309054	0.106627728566176	-0.00531379989646785	4	0.016615800920901	0.0610812761819698	0.0305406380909849	0.606014079201343
A6NHL2	NA	NA	NA	NA	0	NA	NA	NA	NA	NA	NA	NA	NA	NA	0	NA	NA	NA	NA	NA	NA	NA	NA	NA	0	NA	NA	NA	NA	NA	NA	NA	NA	NA	0	NA	NA	NA	NA	NA	NA	NA	NA	NA	0	NA	NA	NA	NA
A6NHR9	0.00856927872517024	-0.029107141457259	-0.234194722953812	-0.0404790693550703	4	-0.0738029137602427	0.108963145480388	0.054481572740194	0.224316808165372	0.536479201806897	-0.0128621509370496	-0.0245956659421323	-0.158117394814125	-0.0236066129523338	4	-0.0547954561614102	0.0690859280509991	0.0345429640254995	0.163767110613397	0.453358951817122	0.0935993670522914	0.0847064973029538	-0.0773748439292065	0.106101424610801	4	0.0517581112592099	0.0865347765370517	0.0432673882685258	0.27672624102396	0.656130951730518	-0.0318087382306762	0.0908235921859261	-0.0967433988592206	0.035291912251201	4	-0.000609158163192423	0.0813716591201398	0.0406858295600699	0.988539762701843	0.997115683232456	-0.121337467050635	-0.0904072214683554	-0.0366806633264683	-0.0376142917997777	4	-0.0715099109113091	0.041640858057871	0.0208204290289355	0.0138925334171524
A6NML8	NA	NA	NA	NA	0	NA	NA	NA	NA	NA	NA	NA	NA	NA	0	NA	NA	NA	NA	NA	NA	NA	NA	NA	0	NA	NA	NA	NA	NA	NA	NA	NA	NA	0	NA	NA	NA	NA	NA	NA	NA	NA	NA	0	NA	NA	NA	NA
A6NNK5	0.0447289420205887	0.142559193981479	0	-0.0229916426262292	4	0.0410741233439595	0.0732668256891277	0.0366334128445638	0.305053106628274	0.618080121539726	0.356510573084454	0.131188726263531	0.0730018309429067	0.110897890115377	4	0.167899755101567	0.128031986784615	0.0640159933923076	0.0394391717785982	0.233773757424907	0.19068356160911	0.0887139861044784	0.082357522292316	0.0829893646710316	4	0.111186108669234	0.0530753711906779	0.026537685595339	0.00575088838585663	0.129038589966134	-0.0643346417521238	0.123278223468196	0.125389100840475	0.163863248655111	4	0.0870489828029146	0.102631956933744	0.051315978466872	0.140750355995914	0.433063529419381	0.423452321531731	-0.0817940911636474	-0.0182237586189073	0.110572866948918	4	0.108501834674523	0.224699809918665	0.112349904959332	0.371465850110709
A8MU27	-0.328080321868958	NA	0.160868076563766	0.186931426748002	3	0.0065730604809368	0.290111167131455	0.167495760438262	0.964405113799894	0.986674176716864	-0.155326730026502	NA	0.323591144110007	0.505358106483538	3	0.224540840189014	0.341298015418645	0.197048501075839	0.231351755508382	0.530471491071598	-0.19713246893471	NA	0.0626556078497676	0.407424315168969	3	0.0909824846946755	0.303272213144042	0.175094293896446	0.561770866864594	0.835397914920534	0.0178664207935137	NA	-0.158064846232251	0.214594050776041	3	0.0247985417791011	0.186426135790769	0.107633179682782	0.794042756837376	0.909928451068759	0.0794979203143693	NA	0.0572025115533331	0.555190601442728	3	0.23063034443681	0.281298403183818	0.162407708800789	0.150397731621902
A8MXP9	-0.144519159921258	-0.199522272016189	-0.200331271087528	-0.190745545026914	4	-0.183779562012972	0.0265310892054822	0.0132655446027411	8.80571407250381e-06	0.00204766720316762	-0.0610294333975597	-0.101003318683476	-0.139668357714349	-0.0815089424229785	4	-0.0958025130545907	0.0334899683345056	0.0167449841672528	0.00123613465228647	0.0426181658947972	-0.0197362180612624	-0.0453919028140143	-0.0151465437538654	0.068580305659524	4	-0.0029235897424045	0.0494921870889825	0.0247460935444913	0.909809907023555	0.981919082089327	-0.104842365857498	-0.0451887737662554	0.00678916566263907	0.0435690149373992	4	-0.0249182397559288	0.0645358404195415	0.0322679202097708	0.469293727441868	0.736969793282428	-0.00980519402953361	-0.120082575888021	-0.148207406709397	-0.0632466038295161	4	-0.085335445114117	0.0615168876273111	0.0307584438136556	0.0322356074899865
A8MXV4	NA	NA	NA	NA	0	NA	NA	NA	NA	NA	NA	NA	NA	NA	0	NA	NA	NA	NA	NA	NA	NA	NA	NA	0	NA	NA	NA	NA	NA	NA	NA	NA	NA	0	NA	NA	NA	NA	NA	NA	NA	NA	NA	0	NA	NA	NA	NA
A8MYT4	0.133591506909289	0.0583556997930805	NA	-0.0019020372443746	3	0.0633483898193316	0.0678846104953387	0.0391931981433167	0.111224707581135	0.397437696238501	-0.0477326107841018	-0.00385575741549948	NA	-0.0457455902215825	3	-0.0324446528070613	0.0247786353026396	0.0143059517621305	0.0422421736572587	0.240034005574987	-0.0903242779649436	0.108586132816093	NA	0.1323170770346	3	0.0501929772952498	0.122268612888874	0.0705918165648333	0.434207392231647	0.768033696507613	0.0808382771224287	0.0833445964791268	NA	0.190942782711395	3	0.118375218770984	0.0628578468559315	0.0362909948029524	0.0114249645132631	0.136091265664165	-0.0332495043499944	0.166856396507491	NA	0.0724084955280501	3	0.0686717958951821	0.100105270004162	0.0577958045842029	0.214801657637077
A8MZF9	0.160206159440525	-0.0135102864062404	0.0526864248343496	0.0848888975865131	4	0.0710677988637867	0.0721757057819457	0.0360878528909728	0.0964437930724027	0.365783423843872	0.00745030448520684	-0.0818582694167725	0.121225777453262	0.0805597269234884	4	0.0318443848612961	0.0892292602255347	0.0446146301127673	0.50217951435717	0.74795271924507	0.174563896245833	0.00636952487572728	0.172016167253998	0.0356239097307214	4	0.0971433745265698	0.0887400860252169	0.0443700430126084	0.0711344764437183	0.404128648863751	0.0594329135191578	-0.00796630981005678	0.130060540564373	0.0169133829363464	4	0.0496101318024551	0.0604231725024598	0.0302115862512299	0.151678954856612	0.451606950630826	-0.109788145538112	-0.0596376775114798	0.396813740659937	-0.0358007214278466	4	0.0478967990456245	0.234646196414715	0.117323098207357	0.697261806222732
B0I1T2	0.031575394253272	0.0266468400657424	0.0228158952522118	0.0188837125463602	4	0.0249804605293966	0.00541989084728077	0.00270994542364039	9.19633166368075e-05	0.00794300303408769	0.069779437778367	-0.00901284973761138	-0.0508043706714913	0.0495698590870401	4	0.0148830191140761	0.055083692004359	0.0275418460021795	0.608394810429826	0.804539594019845	0.103363837767834	0.00848646588782864	0.0536104682467607	0.0540258816825108	4	0.0548716633962336	0.0387529933600481	0.0193764966800241	0.0298843804421208	0.275594801807402	-0.0341078543202642	-0.027266865768993	0.00339857646186492	0.011860155210061	4	-0.0115289971043328	0.0225637629976597	0.0112818814988299	0.34624920103842	0.642154193091499	0.106978656736476	0.0665977487290238	-0.0223049354307245	0.120364952329568	4	0.067909105591086	0.0643385279545054	0.0321692639772527	0.0792638962695879
B0QY34	NA	NA	NA	NA	0	NA	NA	NA	NA	NA	NA	NA	NA	NA	0	NA	NA	NA	NA	NA	NA	NA	NA	NA	0	NA	NA	NA	NA	NA	NA	NA	NA	NA	0	NA	NA	NA	NA	NA	NA	NA	NA	NA	0	NA	NA	NA	NA
B0QYK0	-0.0691620245073955	-0.141158109502201	0.121949087271463	0.0740956175125105	4	-0.00356885730640554	0.122501416268284	0.061250708134142	0.955428510388299	0.986674176716864	-0.113167056732735	0.0165902186713217	0.142486931264191	0.109229069754758	4	0.0387847907393839	0.114453037494129	0.0572265187470643	0.523196500533422	0.761774597724102	-0.198631373008127	0.00424947300135792	0.0912247600465384	0.0356239097307214	4	-0.0168833075573774	0.126390025790047	0.0631950128950235	0.798290010402055	0.940414786268716	-0.0249332921397541	-0.0534092805712239	0.00678916566263907	0.0336307778812802	4	-0.0094806572917647	0.0378233210626338	0.0189116605313169	0.634009216396785	0.831140442830651	-0.0296177968541286	-0.229985570658678	0.141704575770887	0.112209503586025	4	-0.00142232203897363	0.169738665886895	0.0848693329434477	0.987172291547977
B0QZ18	0.0207234790097994	0.0675507279932147	0.00764546061085844	-0.0424352663203967	4	0.0133711003233689	0.0452276575960907	0.0226138287980453	0.575915444488136	0.805717299464041	-0.0258400049352596	-0.00772184737773601	0.0280143761695966	-0.0550713824936759	4	-0.0151547146592687	0.0347674834594063	0.0173837417297032	0.416846251563999	0.685184698125658	-0.0696054674858668	0.0419417630733082	-0.0266117302473197	-0.0620609681322516	4	-0.0290841006980325	0.0509255695181339	0.0254627847590669	0.296886375418773	0.667773447091482	-0.00224894050356217	-0.0208046151392962	-0.0274807364221071	-0.0326921630674488	4	-0.0208066137831036	0.013294076830627	0.0066470384153135	0.0203192339450998	0.172601783159638	-0.0841353352602192	0.0510177372615657	-0.00402987703615298	-0.0321804057491497	4	-0.0173319701959891	0.056367229883587	0.0281836149417935	0.561160056204443
B1AJY5	NA	NA	NA	NA	0	NA	NA	NA	NA	NA	NA	NA	NA	NA	0	NA	NA	NA	NA	NA	NA	NA	NA	NA	0	NA	NA	NA	NA	NA	NA	NA	NA	NA	0	NA	NA	NA	NA	NA	NA	NA	NA	NA	0	NA	NA	NA	NA
B1AK88	-0.0322819588062488	-0.0428940931873347	0.0197945432769748	-0.028797264307435	4	-0.0210446932560109	0.0278784146662493	0.0139392073331246	0.181847989274419	0.4891141605038	0.0148623320079062	0.0317367624251871	0.039393438300087	-0.0126632352657523	4	0.018332324366857	0.0230652338934446	0.0115326169467223	0.163025460025862	0.453358951817122	0.0104166159453384	0.00424947300135792	-0.0113449735940093	-0.0345802317101446	4	-0.00781477908936438	0.0200564343013718	0.0100282171506859	0.465431865652478	0.782931653881447	-0.0158167054627749	0.00950186776715473	0.0269670476002694	-0.00853163362111692	4	0.00303014407088307	0.0191810409773089	0.00959052048865443	0.762740891441953	0.896516688647952	0.0342365361020928	0.00324201269215202	-0.126079748379575	-0.108275851985764	4	-0.0492192628927735	0.0798170215063474	0.0399085107531737	0.263584564077311
B1AKJ5	0.0683414992425392	0.0360455380679919	0.0045921366333045	0.00758317141906417	4	0.0291405863407249	0.0297306713223561	0.0148653356611781	0.0976539042141135	0.368240569181718	-0.0171751438081321	-0.0285178116497685	-0.0786497714440303	-0.0383281186590995	4	-0.0406677113902576	0.0267558801972	0.0133779400986	0.0228055616036039	0.178706122343815	-0.0118093022896334	0.0357277044745257	-0.049819121408645	0.0613214473730307	4	0.00885518203731948	0.0494790738857799	0.02473953694289	0.732646149449276	0.916383231997601	0.0377051678857486	0.0110794458804898	-0.100386570090407	-0.0449258708815163	4	-0.0241319568014213	0.0614025672075347	0.0307012836037674	0.461757606981448	0.732169124756014	-0.0841353352602192	-0.0328272420153698	0.0629925997568464	-0.0195803689695161	4	-0.0183875866220647	0.0609793067733037	0.0304896533866519	0.568537872973709
B1AKR6	-0.191417774558394	-0.0648290636912205	0.270425669449741	-0.114685441404843	4	-0.0251266525511792	0.203798078507315	0.101899039253658	0.813450057652272	0.926897672175958	-0.0215010692109222	-0.14574163344876	-0.0981100854498478	0.112564782318015	4	-0.0381970014478789	0.112787846721721	0.0563939233608604	0.52344298438475	0.761774597724102	-0.318990811807809	0.0766579685294077	0.136475841141439	0.121887910840327	4	0.004007727175841	0.216833002310288	0.108416501155144	0.971711297108876	0.993614700339804	-0.276580937671742	0.159293449712425	-0.104038964549741	-0.120590140813588	4	-0.0854791483306613	0.180749151416493	0.0903745757082467	0.380749931136752	0.671822283432599	-0.0341588614811978	0.0336831262562887	0.20765764879742	-0.0912247600465384	4	0.0289892883814932	0.129593623040447	0.0647968115202236	0.670293391855528
B1ALA9	0.00122730338400218	-0.0850635474312744	-0.0803893868747765	-0.11880743004003	4	-0.0707582652405197	0.0509511005135225	0.0254755502567613	0.0321029348003514	0.211431747062009	0.0190807415657048	-0.0845777707703646	-0.0456426655557124	-0.0217769423952516	4	-0.033229159288906	0.0434290764277741	0.0217145382138871	0.176823995804152	0.47052469132135	0.0751109246950492	-0.0630667951372054	-0.111558764685441	-0.0800076478916501	4	-0.0448805707548118	0.0824794738740268	0.0412397369370134	0.318240227579175	0.690624700625876	0.052948879948959	-0.0208046151392962	-0.0876755183408533	0.0219489728336448	4	-0.00839557017438643	0.0608912348085248	0.0304456174042624	0.791986569294542	0.908605464507552	0.0617336408385299	-0.12538335971133	-0.130478212277092	-0.225342115761843	4	-0.104867511727934	0.12020383002037	0.0601019150101849	0.131628690605126
B1AMU7	NA	NA	NA	NA	0	NA	NA	NA	NA	NA	NA	NA	NA	NA	0	NA	NA	NA	NA	NA	NA	NA	NA	NA	0	NA	NA	NA	NA	NA	NA	NA	NA	NA	0	NA	NA	NA	NA	NA	NA	NA	NA	NA	0	NA	NA	NA	NA
B1APR7	NA	NA	NA	NA	0	NA	NA	NA	NA	NA	NA	NA	NA	NA	0	NA	NA	NA	NA	NA	NA	NA	NA	NA	0	NA	NA	NA	NA	NA	NA	NA	NA	NA	0	NA	NA	NA	NA	NA	NA	NA	NA	NA	0	NA	NA	NA	NA
B1AXG1	-0.0272682438005902	-0.0468575435946775	NA	-0.100350525332469	3	-0.0581587709092456	0.0378291325910052	0.0218406598846269	0.0244631564444649	0.182181104101047	0.106915203916512	-0.0886666588382433	NA	-0.139846878489116	3	-0.0405327778036158	0.130232615753052	0.0751898357622939	0.547760608721652	0.773083429219038	0.0437603855284126	-0.136014783986926	NA	-0.156227679306775	3	-0.0828273592550963	0.110093065773162	0.0635622611600465	0.180087741336107	0.569098005152396	0.0572748053517491	-0.0918388670650768	NA	-0.289128601984938	3	-0.107897554566089	0.173759147203271	0.100319890411969	0.25493216133426	0.569172764928706	0.155640775436065	-0.039483286305683	NA	-0.041248286267517	3	0.0249697342876215	0.113167882158897	0.0653375072280588	0.666991069429647
B2R5W2	-0.255930536113122	-0.281206069609897	-0.283726308803689	-0.310568232722815	4	-0.282857786812381	0.0223340408565204	0.0111670204282602	2.49405472614351e-07	0.000753952743713183	-0.0868627323808266	-0.161446534154635	-0.220729372113804	-0.219393677706612	4	-0.172108079088969	0.0631938700819785	0.0315969350409892	0.00159188282893938	0.0464654015829479	-0.0410900960216473	0.0294867645003806	0.0242789361367121	0.0226014289371326	4	0.00881925838814449	0.0334017930039316	0.0167008965019658	0.616401580815575	0.857515866914626	-0.0808767808666211	0.095292449783575	0.0185938665752644	0.0517989005802049	4	0.0212021090181058	0.0749498608790719	0.037474930439536	0.592064757598457	0.81579625052509	-0.155560912858239	-0.153987915901793	-0.123885534966663	-0.194667075527607	4	-0.157025359813576	0.0290202080349897	0.0145101040174949	3.68563404823948e-05
B2WTI3	NA	0.0785079581897067	0.140149266084689	0.135947498029197	3	0.118201574101198	0.0344398181150069	0.019883838259541	0.000855880184595946	0.0284321516267423	NA	0.00256479185930319	0.112017054437352	0.0373361512729726	3	0.0506393325232092	0.0559256686986934	0.0322886998778005	0.119717473147055	0.399114519534354	NA	0.411842160119037	0.0912247600465384	0.0847804201970196	3	0.195949113454198	0.186996625845745	0.107962552269593	0.082214868261458	0.427037021914755	NA	0.325736355015667	0.0386084540356654	0.204294297405186	3	0.189546368818839	0.14413096103366	0.0832140491513429	0.0416500793577036	0.246647649990028	NA	0.0273276312164651	0.0160078762003921	0.110572866948918	3	0.0513027914552585	0.0516404938025777	0.0298146529980034	0.0948355965705232
B3KS98	0.130229885875585	0.163292892740872	-0.00768619314513207	0.00569111207785572	4	0.0728819243872953	0.0865423955970238	0.0432711977985119	0.143105894571326	0.443701660809352	-0.0565835283663675	-0.0873024081069004	0.00166304922264432	-0.0644578504837531	4	-0.0516701844335942	0.0378671120619972	0.0189335560309986	0.034230178878033	0.215917067304173	0.0284666553020602	0.134017347971687	0.0093864679900772	0.0300572338561799	4	0.0504819262800012	0.0564766724294394	0.0282383362147197	0.12404573512649	0.484483536547001	0.0442579196849145	-0.0191935652333109	-0.0519634216214504	-0.0309529283289121	4	-0.0144629988746897	0.0414275432297081	0.020713771614854	0.511172817508251	0.767266845743517	0.0523405058812197	0.0665977487290238	-0.0616630198838045	0.057195401581543	4	0.0286176590769955	0.0604774035783946	0.0302387017891973	0.380486461746476
B4DDD6	NA	-0.122216545848741	0.110633774043629	-0.0307376748768701	3	-0.0141068155606605	0.117312646290549	0.0677304879151957	0.813309126385622	0.926897672175958	NA	-0.0737303885333722	0.0181889463135232	-0.104561817059186	3	-0.0533677530930118	0.0638585559553573	0.0368687544708863	0.144172691480194	0.431518857766958	NA	-0.247794527773501	0.0149891742194532	-0.203533394085132	3	-0.14544624921306	0.140692593294112	0.0812289066113419	0.0853018526050549	0.43278495096125	NA	-0.050115454846182	0.1485964920018	-0.254214704943784	3	-0.0519112225960552	0.201411602651243	0.116285043008609	0.616498828640812	0.822451879515082	NA	0.163962323238311	-0.0366806633264683	-0.186596033269591	3	-0.0197714577859161	0.175889827032122	0.101550038984712	0.825214601206743
B4DDF4	-0.129666763466949	-0.164651812169137	0.286856013947151	0.219946483975965	4	0.0531209805717575	0.233308924705701	0.116654462352851	0.664856904157158	0.858182075690474	0.00426202685415955	0.0442385307855456	0.00498340751425566	0.110897890115377	4	0.0410954638173344	0.050143262345727	0.0250716311728635	0.152299831821628	0.442400090233548	-0.171886517775599	-0.00853668195448543	0.082357522292316	0.0226014289371326	4	-0.0188660621251589	0.108762313938088	0.0543811569690438	0.740493275777398	0.91984051429006	-0.0479800289018217	0.0530347623218681	0.0435690149373992	0.0219489728336448	4	0.0176431802977726	0.0456422991494558	0.0228211495747279	0.468812038280648	0.736969793282428	-0.268731136003318	-0.192413263843578	0.130719535077085	0.120364952329568	4	-0.0525149781100607	0.207993040313885	0.103996520156942	0.631587666065742
B4DF77	NA	NA	NA	NA	0	NA	NA	NA	NA	NA	NA	NA	NA	NA	0	NA	NA	NA	NA	NA	NA	NA	NA	NA	0	NA	NA	NA	NA	NA	NA	NA	NA	NA	0	NA	NA	NA	NA	NA	NA	NA	NA	NA	0	NA	NA	NA	NA
B4DFG0	-0.0795039687288546	0.100175875487708	0.0423019426865444	0.00569111207785572	4	0.0171662403808133	0.0752755182642589	0.0376377591321295	0.664367245491827	0.858182075690474	-0.108557803480145	-0.0141884428789668	0	-0.0163018123291005	4	-0.0347620146720532	0.0497268104638958	0.0248634052319479	0.21157721344803	0.509234009755888	-0.0505327340189932	0.00636952487572728	0.0187122602621706	0.00379157916237421	4	-0.00541484242968029	0.0307753729307895	0.0153876864653948	0.736946658473926	0.919309202943467	-0.0112799248660028	0.00317424779514364	-0.0361769353919245	-0.0205613224823165	4	-0.016210983736275	0.0165092622067113	0.00825463110335566	0.0971730684746205	0.371370652337267	-0.0160797396678617	0.109347396188361	-0.0366806633264683	0.0349337901093872	4	0.0228801958258545	0.0650313729167678	0.0325156864583839	0.508014086006
B4DJL6	NA	NA	NA	NA	0	NA	NA	NA	NA	NA	NA	NA	NA	NA	0	NA	NA	NA	NA	NA	NA	NA	NA	NA	0	NA	NA	NA	NA	NA	NA	NA	NA	NA	0	NA	NA	NA	NA	NA	NA	NA	NA	NA	0	NA	NA	NA	NA
B4DJV5	0.0846433115716397	0.0247597305214769	-0.062667616914998	-0.195091015302878	4	-0.03708889753119	0.121467311968703	0.0607336559843513	0.563812212616373	0.801455236628905	0.0159180913238756	-0.0941365991952094	-0.00333186069774802	-0.0181245479359183	4	-0.02491872912625	0.0482041257845414	0.0241020628922707	0.34105124559933	0.631728345505791	0.145323028209234	0.0398733827320791	0.126158550155926	-0.181838322985813	4	0.0323791595278565	0.14999576080145	0.0749978804007249	0.681017213600159	0.891604606631997	0.181365153076393	-0.0583641625139887	0.0616131904071607	0.0219489728336448	4	0.0516407884508025	0.0998508099277813	0.0499254049638907	0.34084634182624	0.640384394866826	0.398059164103333	-0.0886804767488873	-0.0595645539998068	0.243454036864278	4	0.123317042554729	0.236857733181745	0.118428866590872	0.337875758566836
B4DL54	0.188495203871948	0.309968260044522	0.00153233688424644	0.0686685451281826	4	0.142166086482225	0.135994726223015	0.0679973631115073	0.0815126894593892	0.334910190859416	0.325338723050014	0.0317367624251871	-0.0387889945146499	0.0125530503430846	4	0.082709885325909	0.16446982646362	0.0822349132318101	0.353347474840444	0.640773495166563	0.343716783652649	0.10067009078325	-0.148658681536699	0.270922315264107	4	0.141662627040827	0.218708938581767	0.109354469290884	0.242772193241822	0.621422811320938	0.0956352790505093	-0.173703514288936	-0.0840642647884744	-0.0537281864175158	4	-0.0539651716111041	0.111987465247193	0.0559937326235964	0.372379665049814	0.667677181165829	0.802269632897821	0.158156701557105	-0.108618778313353	0.139751963542952	4	0.247889879921131	0.389093470417487	0.194546735208744	0.24972090782473
B4DLN1	-0.192820492258484	-0.367793754605988	-0.0341298614395021	0.120294233717712	4	-0.118612468646566	0.209612235167587	0.104806117583793	0.300941665700164	0.615096560309905	-0.00748897883819793	-0.354706965077522	-0.0963300790045619	0.158472588774608	4	-0.0750133585364186	0.214288081451772	0.107144040725886	0.510075372412321	0.752541654857221	-0.495655959487128	-0.190822342335578	0.0131240219998903	0.130584109810144	4	-0.135692542503168	0.274264216789825	0.137132108394912	0.360627241019643	0.717154868507464	0.00224544020564421	0.0652352159273951	-0.135463417295119	0.0101718050572912	4	-0.014452739026197	0.085398969120961	0.0426994845604805	0.746535048033096	0.89263240824185	-0.447378219321062	-0.304186512500095	-0.0202629038925059	0.177761495674279	4	-0.148516535009846	0.280747689478795	0.140373844739397	0.330776288377065
B4DLR8	-0.0834013912906522	-0.297640527695542	0.0482450820525748	0.0722888608068795	4	-0.065126994031685	0.169443050146355	0.0847215250731777	0.471225532693451	0.745359197345357	0.0389514476992082	-0.0696835554706704	-0.010018755824991	0.0390901880129154	4	-0.000415168895884471	0.0516421726473483	0.0258210863236741	0.987692945729222	0.993132771770857	0.018180016065021	-0.150112893317614	-0.119721134638801	-0.0502193554877351	4	-0.0754683418447825	0.0751390821208947	0.0375695410604473	0.0913107452373585	0.444934246284995	0.0289216093025095	-0.0353855987358967	-0.0292157877928547	0.045218752156492	4	0.00238474373256253	0.0406782082316494	0.0203391041158247	0.910488947055443	0.96339099998201	-0.0387142648268055	-0.324364394437726	-0.195810461769286	-0.00531379989646785	4	-0.141050730232571	0.147760836140825	0.0738804180704123	0.104827597714794
B4DP31	NA	0.455759524556309	-0.0901483533371051	0.396384792376952	3	0.253998654532052	0.299514961186103	0.172925043467117	0.139512791434074	0.440248840144669	NA	0.0304806064547614	-0.130531563142225	0.188812617575512	3	0.029587220296016	0.15967396482737	0.0921878065756569	0.717042389663606	0.870272510750351	NA	0.15327925013232	-0.136185736056534	-0.0760001590901254	3	-0.0196355483381131	0.152742337176854	0.0881858294857093	0.800764125468379	0.941070044487248	NA	0.270166667197621	0.0681191542665708	0.0468666050379743	3	0.128384142167389	0.123246221098822	0.0711562389280092	0.0835557301526393	0.343191538385093	NA	0.264656322857784	0.141704575770887	0.0193181771997791	3	0.14189302527615	0.122669181393042	0.0708230848985441	0.0620318682598009
B4DR61	-0.101729886963826	-0.0830272802747558	-0.0200699176009645	0	4	-0.0512067712098867	0.0488424920639073	0.0244212460319536	0.0808331720866335	0.334910190859416	-0.0643728764719302	-0.0656480422355135	-0.0456426655557124	-0.0383281186590995	4	-0.0534979257305639	0.0136347355885749	0.00681736779428745	0.000226394014361775	0.0190108084837679	-0.0424352663203967	-0.0235985119517589	-0.00377175388920842	-0.0404250541847969	4	-0.0275576465865402	0.017966238576009	0.00898311928800448	0.0220063722215382	0.25198963343072	-0.0573028079728853	-0.00477450532034729	-0.00682126585601406	-0.0572642054447594	4	-0.0315406961485015	0.0297369833798534	0.0148684916899267	0.0781417496976733	0.332239816225129	0.0420232148957064	-0.0212525492285966	-0.0956603525017211	-0.079968304703415	4	-0.0387144978845066	0.0626317407575918	0.0313158703787959	0.262560324672902
B4DY09	-0.121629444401531	-0.101457985681943	-0.0999737831931785	-0.08414029815121	4	-0.101800377856966	0.0153679750966064	0.00768398754830319	1.14285646131803e-05	0.00223312928418655	-0.0400323521025198	-0.0669919594644044	-0.130531563142225	-0.0949116470254669	4	-0.0831168804336541	0.0387451429777148	0.0193725714888574	0.00514636806334468	0.0850135008496774	-0.0210616155278297	-0.019279062494883	0.0224257630612349	0.0319151800767623	4	0.00350006627882112	0.0276150056533881	0.013807502826694	0.808351841677735	0.942141804739038	-0.0135465318379479	-0.00477450532034729	0.00339857646186492	0.0169133829363464	4	0.000497730559979051	0.0129476680959397	0.00647383404796987	0.94121593681242	0.975753009939625	-0.203856469899021	-0.121847340684087	-0.112964248589317	-0.0949965139357468	4	-0.133416143277043	0.0482701589082603	0.0241350794541301	0.00147605607088508
B4E0Y9	0.616137424453914	NA	0	0.0704798385750055	3	0.22887242100964	0.33722765171455	0.194698475495581	0.218995684430746	0.530353020441137	0.388654208688175	NA	0.0426281818993879	0.224706287174694	3	0.218662892587419	0.173092156862787	0.0999348033593432	0.0473698751013823	0.250348133621466	0.50065428136381	NA	-0.210513175117739	0.137503523749935	3	0.142548209998669	0.355610565695285	0.205311855830848	0.444425734644544	0.771144944423419	0.351290154518705	NA	-0.142957953842043	0.0286358679608878	3	0.0789893562125168	0.250942032128686	0.144881449800489	0.543395144394647	0.78597297679666	0.272037903006973	NA	-0.466238580344024	0.277401368787615	3	0.0277335638168547	0.427800831107733	0.246990924999595	0.898473600049372
B4E1N1	NA	NA	NA	NA	0	NA	NA	NA	NA	NA	NA	NA	NA	NA	0	NA	NA	NA	NA	NA	NA	NA	NA	NA	0	NA	NA	NA	NA	NA	NA	NA	NA	NA	0	NA	NA	NA	NA	NA	NA	NA	NA	NA	0	NA	NA	NA	NA
B5MDE0	-0.0322819588062488	0.238493791040747	-0.146731881703473	-0.0152869779011945	4	0.0110482431574576	0.162477788557374	0.0812388942786868	0.896271833276754	0.962155451702993	-0.115477217419936	-0.0232906499862191	-0.0733876560386167	-0.040178914347041	4	-0.0630836094479532	0.0406586120965508	0.0203293060482754	0.0210334544043103	0.172782969196277	-0.0157673158583166	0.0966957217659528	-0.0478708496191233	0.0576782761418441	4	0.0226839581075892	0.066228958463446	0.033114479231723	0.518906556135994	0.807741638831801	-0.100017294333518	0.00475875651113575	-0.11874171642122	0.0890631686921818	4	-0.0312342713878549	0.0968772923667848	0.0484386461833924	0.542895695514238	0.785626466031374	0.0471910832546468	0.270049581628003	0.0972534588010288	-0.00354035770524858	4	0.102738441494607	0.118889016614498	0.0594445083072491	0.134669389021431
B5MDF5	-0.0769115241123302	-0.181981690707054	-0.0247413573248621	-0.0721010485282954	4	-0.0889339051681355	0.0663487158911558	0.0331743579455779	0.0364970973275828	0.225164745349557	-0.0643728764719302	-0.0167832188318343	-0.0217959236013446	-0.0272729301501037	4	-0.0325562372638032	0.0216393493827604	0.0108196746913802	0.0237315544701703	0.181644280967028	-0.0424352663203967	-0.0697511084424191	-0.0304537965417139	0.0188590272513159	4	-0.0309452860133034	0.037052317442226	0.018526158721113	0.14588564745696	0.518838014426342	-0.100017294333518	-0.0224174661075973	-0.0414199273799808	-0.0102440314968031	4	-0.0435246798294747	0.0397867712559506	0.0198933856279753	0.071281099668003	0.321103807486928	0.00177562488985128	-0.201715004904923	-0.21203370948764	-0.184585308148444	4	-0.149139599412789	0.101244992532732	0.050622496266366	0.0257424934955005
B8ZWD1	-0.39916341993044	-1.30000366506402	-0.281861156584126	-0.0741006261746439	4	-0.513782216938308	0.541106555622427	0.270553277811214	0.106316293454578	0.388157192165687	0.313366081383938	-1.4409393627216	-0.167431145953755	0.195119491186344	4	-0.274971234026268	0.803777049168683	0.401888524584342	0.519388095735116	0.758154574187333	-1.35030124205144	-1.06529146025172	-0.00188464434494295	0.0776028181239725	4	-0.584968632131033	0.729253473658049	0.364626736829025	0.159770915269622	0.543904816283858	-0.726516644935176	0.0142294363041394	-0.58071552962097	-0.102211611498734	4	-0.348803587437685	0.360116130183924	0.180058065091962	0.100836385416528	0.378198998900948	-1.34792330342031	-1.28033977054573	-0.528727267139618	0.0105692417101873	4	-0.786605274848866	0.648290047779956	0.324145023889978	0.0513920073204094
B8ZZA8	0.0435381082419667	0.119756244457224	NA	-0.104431702144286	3	0.0196208835183014	0.11399159652892	0.0658130789413272	0.736133349529989	0.894066338139476	-0.155326730026502	-0.00514330327595963	NA	-0.0457455902215825	3	-0.0687385411746815	0.0776870147629745	0.0448526188859418	0.12648447720675	0.408205923089735	0.0899205846741929	-0.0697511084424191	NA	0.0411691889764045	3	0.0204462217360595	0.0818281334512446	0.0472434948753607	0.627025182040583	0.864779509843633	-0.0364106401896849	0.0499684592740846	NA	-0.0205613224823165	3	-0.00233450113263891	0.0459836924183752	0.0265486971960819	0.920382644461179	0.969416577695299	-0.0533889753651957	0.109347396188361	NA	0.369233809665719	3	0.141730743496295	0.213164292258275	0.123070461516931	0.227126864952675
B8ZZW5	NA	NA	NA	NA	0	NA	NA	NA	NA	NA	NA	NA	NA	NA	0	NA	NA	NA	NA	NA	NA	NA	NA	NA	0	NA	NA	NA	NA	NA	NA	NA	NA	NA	0	NA	NA	NA	NA	NA	NA	NA	NA	NA	0	NA	NA	NA	NA
B9ZVN9	-0.0588936890535687	NA	0.579329966343999	0.00947275262028235	3	0.176636343303571	0.350414195081843	0.202311729858368	0.344501185816419	0.650079328790908	0.161362987938888	NA	0.622735843353081	0.243084816489549	3	0.342394549260506	0.246197167318271	0.142142000824927	0.0346248235177648	0.216607568468866	-0.544374966792438	NA	0.355437357077613	0.140950825368404	3	-0.0159955947821401	0.469989030346091	0.271348293186487	0.946561132268275	0.98952517939497	-0.241621099317942	NA	0.721228190812237	0.354228586790672	3	0.277945226094989	0.485936263531873	0.280555432559128	0.289587897073608	0.598620363526465	-0.243271151012364	NA	0.350221046356165	-0.041248286267517	3	0.0219005363587614	0.301743396669497	0.174211631293326	0.886436795178296
C9J0E4	-0.221165117952446	0	NA	0.344933260814495	3	0.0412560476206832	0.285295267590614	0.164715299541967	0.776704266593079	0.914837618220691	-0.291048782003391	0.0267055627633801	NA	0.803490212966726	3	0.179715664575572	0.563083449694609	0.325096381257406	0.538007206452349	0.768301242105335	-0.516067419510089	0.160912575034748	NA	0.114893012090678	3	-0.0800872774615544	0.37827035733571	0.218394492634228	0.679457402259263	0.891003394207636	-0.181771244290421	0.2151106643463	NA	0.366157231108705	3	0.133165550388195	0.283006457195782	0.163393854244387	0.374741006040083	0.669924341371478	-0.262323893610179	0.270049581628003	NA	0.58849419169141	3	0.198739959903078	0.429868177680064	0.248184508099639	0.382467874577645
C9J840	NA	-0.0251920914538757	-0.232392480319827	-0.00571365119439365	3	-0.0877660743226986	0.125628222913763	0.0725314883170753	0.207736968228861	0.519033959151701	NA	-0.0298275666565573	-0.222669782683239	0.0107664308690703	3	-0.0805769728235753	0.12471865585845	0.0720063495328445	0.238674628662801	0.537880879577706	NA	0.120379345958726	-0.107494832305542	-0.188312657146363	3	-0.0584760478310597	0.160077540956796	0.0924208113626197	0.483592634522995	0.795779565103448	NA	0.12764782309596	0.0468666050379743	-0.0840642647884744	3	0.0301500544484867	0.106841398047783	0.0616849099234835	0.584450173806495	0.813839564906703	NA	-0.0766507878876878	-0.112964248589317	-0.148863385914483	3	-0.112826140797162	0.0361064971129374	0.0208460958276489	0.00131491829096059
C9J8E1	-0.135049960163853	-0.111799929903402	-0.0658736072140893	0.0504294268431402	4	-0.065573517609551	0.0825037987792627	0.0412518993896313	0.163029664019953	0.465381184449782	-0.0778246759405379	-0.0764345974617503	-0.0821685415808264	0.0178996718085629	4	-0.0546320357936379	0.048416106173237	0.0242080530866185	0.064835109842496	0.286964183094971	-0.0118093022896334	-0.103645268153795	-0.0694479281575776	-0.0306967972229165	4	-0.0538998239559806	0.0409322416782586	0.0204661208391293	0.0388712267318226	0.3133539157608	-0.126757142285939	-0.13655051587147	-0.0449258708815163	0.050156674972159	4	-0.0645192135166915	0.0867881074278768	0.0433940537139384	0.187617868084147	0.494911706124239	-0.0983305469381429	-0.161228558658052	-0.130478212277092	-0.115919287299567	4	-0.126489151293214	0.0266293575818299	0.013314678790915	7.75408519670955e-05
C9JA28	0.227819713249736	0.00191975416336559	-0.172418525367122	0.00569111207785572	4	0.0157530135309587	0.16398517626752	0.0819925881337601	0.853980057730216	0.944250809992115	0.0889685241571133	-0.0777886051077257	-0.0456426655557124	-0.00722251841823834	4	-0.0104213162311408	0.0722667921401322	0.0361333960700661	0.782735451850427	0.902444420649825	0.110644063683992	-0.0742245850217269	-0.117676208653777	0.0337707366552442	4	-0.0118714983340668	0.103562896664679	0.0517814483323395	0.826280721866346	0.949834202206114	0.0377051678857486	-0.206328661783429	-0.0484403550577532	0.00339857646186492	4	-0.0534163181233921	0.107916638370061	0.0539583191850305	0.360423063405645	0.659539298229579	0.191867554322989	-0.109539081646552	-0.205058538571302	-0.00708942478631919	4	-0.0324548726702959	0.169997997982794	0.0849989989913968	0.715747063177017
C9JAZ1	0.0671700050320953	0.251461923669046	0.293125884923235	-0.177787119215283	4	0.108492673602273	0.214626273555352	0.107313136777676	0.351039258124243	0.655461196608762	-0.0654890815882595	0.155592526711692	0.0458556889297838	0.155241467511595	4	0.0728001503912027	0.105674128070299	0.0528370640351496	0.217439899808488	0.516935312005766	0.115477217419936	-0.0586277299707084	0.0353482618540323	-0.179686652130764	4	-0.0218722257068761	0.127011041521519	0.0635055207607593	0.742285196138705	0.91984051429006	-0.00224894050356217	0.00158799690319211	-0.210251066429387	0.0419173890662409	4	-0.0422486552408791	0.113769302288634	0.056884651144317	0.485709052680852	0.748368229487367	-0.257006176417785	-0.0852331751304184	0.310210300127865	0.057195401581543	4	0.00629158754030119	0.239902950400148	0.119951475200074	0.959871949864571
C9JBI3	0.188495203871948	0.137328873905174	-0.0263018713124791	-0.0922226444490686	4	0.0518248905038935	0.132719238710326	0.0663596193551632	0.464508683906386	0.743366044403359	0.0606000110039714	0.0713669291762311	0.122754866140006	-0.102626612153472	4	0.0380237985416841	0.0976103505008945	0.0488051752504472	0.465533160532997	0.722066056588635	0.219028187303071	0.0705919678300537	0.0590443542973887	-0.133144066193734	4	0.0538801108091948	0.144404392279853	0.0722021961399266	0.483724707256911	0.795779565103448	0.0998352675797947	-0.0240321221696921	0.0713611669587229	-0.236067358233524	4	-0.0222257614661748	0.15208429617679	0.0760421480883951	0.779914415840223	0.901726957723804	0.111919398006747	0.375137188822002	0.143527311377705	-0.121678556588252	4	0.12722633540455	0.203235053284201	0.1016175266421	0.257159576875309
C9JCC6	0.217296726837728	0.197200329882572	0.114887423437277	0.323827627802844	4	0.213303026990105	0.0859778360976295	0.0429889180488147	0.00254762148022574	0.0494898801813381	0.00319769995904945	0.232988431025901	0.197213858340451	0.282119529673632	4	0.178879879749758	0.122183637345031	0.0610918186725153	0.026353831464595	0.192801776340163	0.109433241085945	-0.150112893317614	-0.109525367532913	-0.0384741478146357	4	-0.0471697918948045	0.114142636072073	0.0570713180360367	0.440139382270066	0.768252090649557	0.149303943844095	-0.140047960107697	0.147060893090575	0.280508167507382	4	0.109206261083589	0.177494419868388	0.0887472099341939	0.264547851724176	0.582711068699396	0.00532033193326353	-0.0613299886039318	0.193650790803541	0.428236997033703	4	0.141469532791644	0.21956222581019	0.109781112905095	0.24497451519935
C9JFR7	-0.137749109764808	-0.343215731885322	0.363932236965792	-0.0821267667135617	4	-0.0497898428494749	0.297795914995724	0.148897957497862	0.749465204027975	0.902283278286168	-0.0868627323808266	0.144023137999555	-0.0945522660366587	-0.184178985122554	4	-0.0553927113851211	0.140090944545513	0.0700454722727564	0.459162885085507	0.718061673908803	-0.523561956057013	0.157100961084729	0.302969937183478	-0.173250827149089	4	-0.059185471234474	0.368145254724186	0.184072627362093	0.758712472638425	0.925572893576831	-0.0503050818480656	0.062194761607344	-0.173331602885562	-0.43559882176116	4	-0.149260186221861	0.213755744519912	0.106877872259956	0.21202570420616	0.524924784426648	-0.226544064606916	-0.0715257557098203	0.216343376663643	-0.263034405833794	4	-0.0861902123717216	0.218109063988881	0.10905453199444	0.45941734830689
C9JG97	0.161304518869967	0.0509572474719202	-0.148430169175498	NA	3	0.0212771990554632	0.156985901278293	0.0906358523619984	0.790267639657891	0.919545448300926	0.0201334194970414	0.109937514899584	-0.26004229613863	NA	3	-0.0433237872473347	0.192980252771668	0.111417200886005	0.661642365582679	0.836530686389142	0.0837683576925976	0.0986842748594067	-0.0343061220373204	NA	3	0.0493821701715613	0.0728588967516058	0.0420651036523988	0.219523355011602	0.600560273484229	0.139136917687096	0.0391847835608438	0.035291912251201	NA	3	0.0712045378330468	0.0588633569059261	0.0339847749550415	0.0542089377817494	0.277580198022953	0.0255350921071374	0.236006118101038	-0.0284484296293695	NA	3	0.0776975935262688	0.139730980349918	0.0806737191191557	0.301732681412467
C9JJ19	-0.152685380069679	-0.050831912611975	0.183995224991954	-0.0861566437497147	4	-0.0264196778598537	0.146494506377082	0.0732472531885412	0.730688526049337	0.892361593667389	-0.0312820900035077	0.0178585220856556	0.0247466623356856	-0.089152377736782	4	-0.0194573208297372	0.0527373693676645	0.0263686846838322	0.488421934997985	0.737736401912784	-0.0945039864632345	0.0481291708742791	0.14160694924459	-0.179686652130764	4	-0.0211136296187825	0.143531762050651	0.0717658810253256	0.778516593164103	0.930417065666236	-0.156504485679991	-0.0867678775176549	-0.107700629055713	-0.105868635106823	4	-0.114210406840045	0.0297424717812781	0.0148712358906391	0.000255019608204329	0.0154184855120337	-0.318822184019541	-0.10081131733402	0.231847114364491	-0.117836490293858	4	-0.0764057193207318	0.228106476475244	0.114053238237622	0.527838863057082
C9JKF1	0.134710308858254	0.0546612162353389	0.171797636722025	NA	3	0.120389720605206	0.0598668914095549	0.0345641658708526	0.00879782599275982	0.102291646061973	-0.280641558940225	0.00256479185930319	0.0426281818993879	NA	3	-0.078482861727178	0.176216835034378	0.101738837142842	0.398826203624392	0.672796659350745	-0.0104923738176424	-0.0586277299707084	0.0353482618540323	NA	3	-0.0112572806447728	0.0469926650840488	0.0271312278362135	0.640975247541645	0.871645602032565	0.0442579196849145	0.0712969687145964	-0.0949252574202413	NA	3	0.00687654365975657	0.0891935119302742	0.0514958981229119	0.879438784883805	0.947460664354357	-0.0784961292233498	0.532635318498177	0.0436012454442463	NA	3	0.165913478239691	0.323404736077114	0.186717811431322	0.336792766045031
C9JLU1	0.167877172793454	-0.0608160011845971	0	0.186931426748002	4	0.0734981495892147	0.122769129506155	0.0613845647530777	0.276327897987758	0.590763250082739	-0.0433274316641007	0.134700358928492	0.207338075614158	0.207651122994964	4	0.126590531468378	0.11836225310565	0.0591811265528251	0.0762518585644447	0.313618188354172	0.189538110940847	0.00636952487572728	0.186983742851969	0.130584109810144	4	0.128368872119672	0.0857634865097025	0.0428817432548513	0.0242087804533052	0.254719340768582	0.0615877982228317	-0.0386459278994835	0.159300160905186	0.0402638702137272	4	0.0556264753605653	0.0814597366760535	0.0407298683380268	0.220999554765057	0.532760489676847	0.466521043423617	0.109347396188361	0.10475774121313	0.136538832947766	4	0.204291253443218	0.175381592842051	0.0876907964210253	0.058666637023659
C9JLV4	NA	0.555855359263897	0.14570344057088	-0.068110188332261	3	0.211149537167506	0.317089332549275	0.183071611504483	0.2265224706001	0.537080336175768	NA	0.066472284817518	-0.0646598917260847	-0.339596742980369	3	-0.112594783296312	0.207234961352006	0.119647160722082	0.311760561394368	0.606751798678599	NA	0.415037499278844	0.138188239017125	-0.194816176984023	3	0.119469853770649	0.305357430026698	0.176298194424967	0.454769874510982	0.775367103779924	NA	0.062194761607344	0.069741071290561	-0.282905608694776	3	-0.050323258598957	0.201457560988734	0.116311577067131	0.627122025867533	0.828342576783879	NA	0.0557094325862876	0.275721923742575	-0.0558764981925061	3	0.0918516193787854	0.168727803301847	0.0974150426560957	0.31091626920644
C9JPE1	NA	NA	NA	NA	0	NA	NA	NA	NA	NA	NA	NA	NA	NA	0	NA	NA	NA	NA	NA	NA	NA	NA	NA	0	NA	NA	NA	NA	NA	NA	NA	NA	NA	0	NA	NA	NA	NA	NA	NA	NA	NA	NA	0	NA	NA	NA	NA
C9JQ41	-0.0423619651636805	-0.126404342812174	0.106367546072601	0.0170064253056899	4	-0.0113480841493908	0.0980828752943904	0.0490414376471952	0.824695106160482	0.931010947868941	-0.0982405124946323	-0.0232906499862191	-0.195738693236103	-0.167900165964822	4	-0.121292505420444	0.0771368198897405	0.0385684099448703	0.019944250929748	0.169358063372551	-0.212192052868227	0.258416641080929	0.0680555955923575	0.140950825368404	4	0.0638077522933657	0.200014674412088	0.100007337206044	0.547016874073462	0.828058092300489	0.19713246893471	-0.0633361204765149	-0.268488835925902	-0.141080666601373	4	-0.06894328851727	0.196511217529298	0.098255608764649	0.509171150428604	0.766159338165687	-0.108829862513248	0.103317314093341	-0.034618196869576	-0.0285691521967708	4	-0.0171749743715635	0.0882290643707278	0.0441145321853639	0.710477151621193
C9JRZ6	-0.0335381147766745	-0.00192231213102856	0.0644635926107032	-0.0942503257960511	4	-0.0163117900232627	0.0660880249782841	0.0330440124891421	0.639108820149291	0.848496250905274	-0.0411298759598548	-0.0536087926125991	0.00166304922264432	-0.0929893348944384	4	-0.046516238561062	0.0389885012074164	0.0194942506037082	0.0543104937536202	0.266095012345533	-0.0958999179131098	0.00636952487572728	0.020570206482753	-0.0880561766651962	4	-0.0392540908049564	0.0612395682730917	0.0306197841365458	0.247152844589374	0.62452906446806	-0.0158167054627749	-0.0288869614371549	-0.00853163362111692	-0.0858687616352223	4	-0.0347760155390673	0.0350873798902381	0.017543689945119	0.094727787106113	0.367119732140136	0.157234913764992	-0.0495252876913065	-0.0553767570363734	-0.168599603975745	4	-0.0290666837346083	0.135755289025172	0.0678776445125858	0.683435017607674
C9JS59	0.574694165267329	0.732733121347977	0.321621432107828	0.0614005446641434	4	0.422612315846819	0.294378953712816	0.147189476856408	0.0283820153465985	0.197797440404349	-0.214765196740542	0.199846965086264	0.242926832385219	0.380865010111055	4	0.152218402710499	0.25654936660083	0.128274683300415	0.280213137538584	0.582878079893244	-0.148522524710088	0.407035842378103	0.0371849203336494	0.451124330573264	4	0.186705642143732	0.290515065604117	0.145257532802058	0.246053543630666	0.623779317867854	-0.41055010828653	0.20962512526257	0.798578784573367	0.317839206819484	4	0.228873252092223	0.497229678326044	0.248614839163022	0.392771718399306	0.681439580669205	-0.154571749267285	0.378886073670909	0.766836123748344	0.528473263066949	4	0.379905927804729	0.390493131408066	0.195246565704033	0.0996408790574466
C9JSZ1	NA	NA	NA	NA	0	NA	NA	NA	NA	NA	NA	NA	NA	NA	0	NA	NA	NA	NA	NA	NA	NA	NA	NA	0	NA	NA	NA	NA	NA	NA	NA	NA	NA	0	NA	NA	NA	NA	NA	NA	NA	NA	NA	0	NA	NA	NA	NA
C9JVE2	0.0612982222384194	0.105542385237523	0	-0.0942503257960511	4	0.0181475704199728	0.0865302525041323	0.0432651262520661	0.689490581947917	0.870898877975815	0.0232868525359158	0.157895312581113	0.0198311719215691	-0.161842655144454	4	0.00979267047353594	0.131245243799656	0.0656226218998278	0.886263977510595	0.95310370322197	-0.037062094221545	0.0460696486959847	0.124431805436457	-0.104289203521549	4	0.00728753909733703	0.0994033712205187	0.0497016856102594	0.888230093941724	0.973159931598519	0.00672586318831336	0.095292449783575	0.217523381814712	-0.0102440314968031	4	0.0773244158224494	0.104292839175192	0.052146419587596	0.188638996659286	0.495874510348714	-0.191630167565761	0.181240314670147	0.148981741469813	-0.133266530863464	4	0.0013313394276836	0.191065966325847	0.0955329831629237	0.989332940896771
C9JVN9	0.313307612315017	0.171844755605678	NA	0.00947275262028235	3	0.164875040180326	0.15203729210711	0.0877787715249016	0.0747441888518618	0.320695689294674	0.107905725782328	0.348381636505742	NA	-0.0438876440010001	3	0.137466572762357	0.197798331294659	0.11419891981823	0.209747993902241	0.506836986275574	0.231325546106456	0.560642821525743	NA	0.229426013190974	3	0.340464793607724	0.19068213088731	0.11009037959744	0.0140524875747886	0.209264383933921	0.273483355064825	0.470367719588374	NA	0.159300160905186	3	0.301050411852795	0.157355373220119	0.09084916708707	0.0107356007091094	0.132053438699863	0.246056070658283	0.19406435502773	NA	0.165202591199909	3	0.201774338961974	0.0409744331788877	0.0236566000257232	0.000155854261853137
C9JW51	-0.156785889815147	-0.362844538634255	0.240890159994971	0.361302333221507	4	0.0206405161917688	0.33818204959306	0.16909102479653	0.906831361693986	0.96730811799609	-0.332101158296772	-0.250255801112491	0.362939811585832	0.80039097430784	4	0.145243456621102	0.53568881425536	0.26784440712768	0.607170711409225	0.803975935431488	-0.122682519774829	0.307385537303479	0.339152273490124	0.25191837363962	4	0.193943416164599	0.214139990113961	0.107069995056981	0.120046903825726	0.483018672175939	0.0956352790505093	-0.166552594860937	0.385821711485989	0.40907065751703	4	0.180993763298148	0.272058878393428	0.136029439196714	0.2316703805645	0.546205731770731	-0.0916887296918543	-0.161228558658052	0.622695148076265	0.806344277504268	4	0.294030534307657	0.492113127969601	0.246056563984801	0.277185343737697
C9JZR2	-0.0335381147766745	-0.0528232104310665	0.00764546061085844	0.0991554666595613	4	0.00510990051566971	0.0675793657026697	0.0337896828513349	0.884753336616279	0.958641339279932	-0.108557803480145	0.0676975036095344	-0.152557869472224	0.0249978167097296	4	-0.0421050881582764	0.105158910344122	0.0525794551720611	0.453786521086753	0.715222446947473	-0.0614005446641434	0.0460696486959847	-0.0933605481019058	-0.0800076478916501	4	-0.0471747729904286	0.0635295685810252	0.0317647842905126	0.188050756845289	0.574800240589797	0.175407697779994	0.0173725639981195	-0.0625845373780228	-0.0379224831437538	4	0.0230683103140841	0.106920558833756	0.0534602794168782	0.681175809599194	0.860867254355504	-0.220321071316753	-0.0378163941030451	-0.11078987735498	0.15094189807474	4	-0.0544963611750097	0.156151522697866	0.0780757613489332	0.511311270754577
D1MQ08	-0.221165117952446	-0.31904942075457	0.0920549778836438	-0.0741006261746439	4	-0.130565046749504	0.179334546127787	0.0896672730638933	0.195615283653884	0.505855434119496	-0.222214585275713	-0.141487984055113	0.176749755780736	-0.192387798398087	4	-0.0948351529870442	0.184098603755293	0.0920493018776465	0.34261475401459	0.632310379356597	0.00130619750062472	-0.263034405833794	-0.214878367679141	-0.303069067636047	4	-0.194918910912089	0.135694325764274	0.0678471628821368	0.028319005894538	0.271795711989943	-0.428584031116792	0.17767197902728	0.172946353417549	-0.173331602885562	4	-0.0628243253893811	0.294062525174818	0.147031262587409	0.684080166335256	0.863094466958047	-0.208981502076888	-0.499123401950481	0.35494861489315	0.247927513443586	4	-0.0263071939226583	0.398951014500728	0.199475507250364	0.899389085886269
D3DQV9	0.0518533764539703	-0.128502808696172	0.0746903344579515	0.161664668137572	4	0.0399263925883306	0.121846061593422	0.060923030796711	0.536539983304339	0.784805575785913	0.0264334078527797	-0.0509469928890846	0.0280143761695966	0.082262022154489	4	0.0214407033219452	0.0547946215745988	0.0273973107872994	0.463628913741214	0.721129439647855	-0.0917161690916153	-0.117429083586895	-0.0537235758645611	0.0281968918306521	4	-0.0586679841781047	0.0635478905692261	0.0317739452846131	0.114356451700271	0.476826970330922	-0.0341078543202642	-0.0484713577555569	0.0303027601635257	0.0319677286586358	4	-0.00507718081341487	0.0422291374056328	0.0211145687028164	0.817979988045131	0.921637534051596	-0.0305248670134586	-0.111290988408144	0.0338069441413081	0.147753620443692	4	0.00993617729084934	0.109387054317566	0.0546935271587831	0.861823660210089
D3DSM0	-0.140453318693186	-0.141158109502201	-0.0499144285344295	-0.08414029815121	4	-0.103916538720257	0.0448300437975242	0.0224150218987621	0.00355523284306303	0.0571943472920629	-0.0193364850975993	-0.021986813439374	0.19430812716504	0.00359774510860439	4	0.0391456434341678	0.10407751289928	0.05203875644964	0.480365810661739	0.732666925141492	-0.0277069291698421	-0.0542022815899131	0.0517946152180008	-0.106331235059768	4	-0.0341114576503805	0.0659297828409296	0.0329648914204648	0.340664268211848	0.705845156137366	0.0701752940595554	0.0484328603628594	0.125389100840475	0.011860155210061	4	0.0639643526182378	0.0474961406396418	0.0237480703198209	0.0358872250197103	0.231265713942744	-0.214124805352848	-0.226184000498822	-0.374693638467198	-0.45567948377619	4	-0.317670482023764	0.117458657116061	0.0587293285580303	0.00164971831409956
D3DTX6	0.0494824719912233	0.203887225009815	0.0378284661072364	0.0263685285093811	4	0.079391672904414	0.0835317440539737	0.0417658720269869	0.106041202485191	0.387620985626036	0.146979069776232	0.0467259366446403	-0.010018755824991	-0.0217769423952516	4	0.0404773270501575	0.0770435261729169	0.0385217630864584	0.333834028945142	0.627204470667239	-0.0410900960216473	0.145605322246899	0.0316679153660836	0.0794005691863667	4	0.0538959276944256	0.0786925007445077	0.0393462503722538	0.2198022444783	0.600779552493581	0.0507810432662489	0.134901207107281	0.0336307778812802	0.0762105666201186	4	0.0738808987187321	0.0442816024165019	0.022140801208251	0.0156725286009617	0.153240518659198	0.243056703588574	0.18695396586454	0.119650209359765	0.0435366482836487	4	0.148299381774132	0.0861570897006825	0.0430785448503412	0.0137581598377344
D3YTB1	-0.0550618274625417	-0.113877244936011	-0.0610672894731557	-0.0861566437497147	4	-0.0790407514053558	0.026846795790506	0.013423397895253	0.00106425974570719	0.030935165493008	0.0264334078527797	-0.00772184737773601	-0.11063200570452	-0.147806595457592	4	-0.0599317601717673	0.0826182361133847	0.0413091180566923	0.197025192701416	0.49350876281652	0	-0.0697511084424191	-0.024694527253029	-0.0443347992358782	4	-0.0346951087328315	0.0295838297529258	0.0147919148764629	0.0574069611517988	0.36691269423978	-0.0318087382306762	-0.0224174661075973	-0.064362350345926	-0.0714955912854187	4	-0.0475210364924046	0.0240518515750627	0.0120259257875313	0.00752426373584188	0.108588064832002	-0.0196774847764661	-0.0749404201225849	-0.21436628079753	-0.188609564707239	4	-0.124398437600955	0.0924298925439573	0.0462149462719787	0.035969427691222
D6RAN1	-0.133702276702106	-0.201729915967841	0.0992290107713798	0.104469266556029	4	-0.0329334788356346	0.158106531503573	0.0790532657517867	0.69146479960536	0.871595478134464	0.121702094972646	-0.0245956659421323	0.624895566871518	0.721756318838117	4	0.360939578685037	0.367756025165673	0.183878012582836	0.0972992078167015	0.355665665332392	0.0788276164223272	0.0563379841498118	0.155201349393333	-0.0900753443018482	4	0.050072901415906	0.102566411410152	0.0512832057050761	0.366574733651041	0.719581441446166	-0.0249332921397541	0.159293449712425	-0.109534952304593	-0.126149666155489	4	-0.0253311152218526	0.130819283278105	0.0654096416390523	0.711921468949788	0.877349612978071	0.118480842135005	-0.102552651330445	-0.0470374561236439	0.0757675076179648	4	0.0111645605747203	0.10329473056234	0.0516473652811702	0.836017905305936
D6RB85	-0.314274522343927	-0.0389415015618345	0.0045921366333045	-0.102389670606068	4	-0.112753389469631	0.141346313424995	0.0706731567124974	0.161729777106468	0.465230288828379	-0.179292315017379	-0.276445325093354	-0.201467469953171	-0.257641147063575	4	-0.22871156428187	0.0458255225639906	0.0229127612819953	5.85231630804674e-05	0.00884577609961264	-0.0792372298099242	0.270815569805405	0.0242789361367121	0.0613214473730307	4	0.0692946808763058	0.146926724246969	0.0734633621234844	0.381964156253715	0.726392129318493	0.189270351161739	0.0438162322924896	-0.135463417295119	-0.165678030342126	4	-0.0170137160457541	0.165715427837174	0.0828577139185872	0.844098447938378	0.932301647101833	-0.336660989857229	-0.492258860652667	-0.269083450506599	-0.206858937162097	4	-0.326215559544648	0.122732182748956	0.0613660913744782	0.0018022334152111
D6RBQ9	-0.136398903731872	-0.126404342812174	-0.25783108722105	0.00189953291548151	4	-0.129683700212404	0.106131597840916	0.0530657989204578	0.0502098607199139	0.266288436765438	-0.00106747695649989	0.0895753539771787	-0.0751395628002094	0.0460850867625645	4	0.0148633502457585	0.0705005814273823	0.0352502907136911	0.687968303034317	0.849212013524128	0.00521770927101928	-0.0149725069361604	0.00188218557797637	-0.0581029545635683	4	-0.0164938916626833	0.0291130128798959	0.0145565064399479	0.300412468325473	0.670219108301036	-0.0785019736787177	0.0126553008060289	0.050156674972159	0.0419173890662409	4	0.0065568477914278	0.0589449094451725	0.0294724547225863	0.83132486578836	0.925624477205684	-0.0368903770479952	-0.15038117642106	-0.207379850481423	-0.188609564707239	4	-0.145815242164429	0.0763915986554197	0.0381957993277098	0.00878555392724892
D6RBW1	-0.0260175328068798	0.0152869779011945	0.0213060101945743	0.0375234426462029	4	0.012024724483773	0.0270443002590211	0.0135221501295105	0.408098522647614	0.700955587479397	0.0169730786037136	0.0127786047213025	0.0586939942590233	0.0530462343616342	4	0.0353729779864184	0.023841670742828	0.011920835371414	0.0250441654249276	0.186934597727299	-0.0627647953954863	-0.00853668195448543	0.0335092621902512	0.00757321970480085	4	-0.00755474886372991	0.0406785031988041	0.0203392515994021	0.723075393889153	0.913056355775651	-0.0549664592179286	-0.0733317381119601	0.035291912251201	0.0485125778815339	4	-0.0111234267992884	0.0619217846467061	0.0309608923233531	0.731695928686421	0.886895265605073	-0.00980519402953361	0.0161376966846774	0.0100257181852663	-0.0267669095627853	4	-0.00260217218059382	0.0195487796438067	0.00977438982190333	0.798979396444198
D6RBZ0	-0.180244862639137	-0.221752219399655	0.00916970273984824	-0.0522562371314239	4	-0.111270904107592	0.107938560734434	0.0539692803672168	0.0848512486475149	0.341551697285536	-0.0291027919442606	-0.0522772788670546	-0.0268728615358724	-0.0144813767047317	4	-0.0306835772629798	0.0157672623756971	0.00788363118784855	0.00805751269337025	0.104057246332852	0.0143035380294979	0	0.0408512375314192	0.00568363850358267	4	0.0152096035161249	0.0180775219372776	0.00903876096863878	0.143421479845398	0.516559786014687	0.0222986671087744	0.0652352159273951	0.0101718050572912	0.023623604525899	4	0.0303323231548399	0.0240430513105336	0.0120215256552668	0.0450937608676895	0.25720460208118	-0.00355781941318911	-0.224286965326225	0.0338069441413081	0.0486738467356896	4	-0.036340998465604	0.127209382573953	0.0636046912869763	0.588504138838996
D6RCB9	-0.180244862639137	0.0360455380679919	-0.0836350463784307	-0.08414029815121	4	-0.0779936672751963	0.0885623199371924	0.0442811599685962	0.12865853054684	0.423215166314577	-0.211054877402167	0.240613111125999	-0.244188344937793	-0.0682296043729615	4	-0.0707149288967307	0.221148255371705	0.110574127685852	0.546108262006073	0.772163365783142	0.0130090605618627	0.334639146636916	-0.0208677477125158	0.0540258816825108	4	0.0952015852921935	0.162535622286485	0.0812678111432423	0.285825484273538	0.661641322504455	-0.126757142285939	0.223300062159647	-0.00340660144324945	-0.00340660144324945	4	0.0224324292468022	0.145991603891154	0.072995801945577	0.768993639981522	0.896516688647952	-0.203856469899021	0.0866034405320712	0.0140165783813007	0.0757675076179648	4	-0.00686723584192097	0.135161829176985	0.0675809145884925	0.922373012035618
D6RCP9	0.114437913831993	0.0929893348944384	-0.0706959906709325	-0.0326806987946631	4	0.026012639815209	0.0914738104165296	0.0457369052082648	0.590166581236805	0.81725770731968	0.159453397930257	0.499477089127593	0.0856018677225403	-0.0476059322471102	4	0.17423160563332	0.23314526488245	0.116572632441225	0.185636743391438	0.480873929110812	0.182646242543691	0.424581271949715	0.221315783196266	-0.0443347992358782	4	0.196052124613448	0.19220597845284	0.0961029892264198	0.0874418471044163	0.434612772123708	-0.0785019736787177	0.172041942454413	0.0681191542665708	-0.0257477691976516	4	0.0339778384611538	0.110221266256594	0.0551106331282972	0.560188694170015	0.799929344580046	0.1492465487211	0.363831727948619	-0.143754640702766	-0.254572827085598	4	0.0286877022203388	0.280967876305247	0.140483938152623	0.844942788207304
D6REB4	0.146960205265433	0.0929893348944384	-0.126506853639439	0.125530882083859	4	0.059743392151073	0.12613380869458	0.06306690434729	0.380058605282043	0.680235147286924	0.342271957830315	0.109937514899584	-0.0473611827820118	-0.208946890271497	4	0.0489753499190978	0.234906999533249	0.117453499766624	0.691203016976998	0.850776351922421	0.261072889500507	-0.00426202685415955	-0.23247242769388	-0.0443347992358782	4	-0.00499909107085245	0.203376710335019	0.10168835516751	0.96238669921777	0.993008049123194	0.228159364555334	0.0545654733841815	-0.260314904480202	-0.171414399891271	4	-0.0372511166079893	0.221080867369376	0.110540433684688	0.747599154777075	0.89263240824185	-0.0654230749980486	-0.128928066754742	-0.0700875404118141	-0.273681650033302	4	-0.134530083049477	0.0971650846824579	0.048582542341229	0.0324609183845068
D6RER5	0.0399596978727167	-0.091189650228116	-0.00306956507476225	-0.0901978089715783	4	-0.0361243316004349	0.065415409503454	0.032707704751727	0.311705864020917	0.622793672792619	0.0180272949757151	-0.0115983254132592	-0.0133738620833715	-0.0796043942376184	4	-0.0216373216896335	0.0412412799910227	0.0206206399955113	0.334453723690238	0.627204470667239	0.0513468800002201	-0.00212943956134715	-0.0266117302473197	-0.0581029545635683	4	-0.00887431109300376	0.0462246706311431	0.0231123353155715	0.714243274199332	0.907972000800917	-0.0387171075728538	-0.0240321221696921	-0.0205613224823165	-0.0572642054447594	4	-0.0351436894174054	0.0167152515063354	0.00835762575316769	0.00565447698515444	0.0914090049525234	0.184850920460598	-0.0212525492285966	0.00802614053891776	-0.0931094043914814	4	0.0196287768448594	0.118059530520595	0.0590297652602975	0.750804399149344
D6REX3	0.0207234790097994	-0.0830272802747558	0.0182814911814052	-0.00762324120302504	4	-0.0129113878216441	0.0484716509464523	0.0242358254732262	0.613357335291908	0.833043569963137	0.071811402960596	-0.0128928028808943	0.0442428379614828	0.0089775961192573	4	0.0280347585401104	0.0374937201793048	0.0187468600896524	0.185429749771325	0.480749685727886	0	-0.0497903667115313	0.0390192435825293	0	4	-0.00269278078225048	0.0363894568689728	0.0181947284344864	0.887192863772972	0.972635532493805	0	-0.0175843123716538	0.0468666050379743	-0.0119584643080549	4	0.00433095708956639	0.029289718450506	0.014644859225253	0.777402437994152	0.90168280164859	0.12907994916493	-0.0852331751304184	-0.00201353143764832	-0.054039839712889	4	-0.00305164927900652	0.0945400016765219	0.047270000838261	0.950623205087941
D6RGX2	NA	-0.0409164437468922	0.0848450926087239	-0.108524456778169	3	-0.0215319359721125	0.0981313661057227	0.0566561706370847	0.668693645071134	0.860196123000016	NA	-0.0723801825004357	0.0181889463135232	-0.137863792210014	3	-0.0640183427989755	0.078361690720457	0.04524214323161	0.151573650341253	0.442284888978386	NA	-0.210384608714096	0.0481560381546526	-0.501077330345535	3	-0.221101966968326	0.274773487793997	0.158640547144037	0.156627692949251	0.536037829961491	NA	-0.330693460403744	-0.154273267069877	0.0468666050379743	3	-0.146033374145216	0.188914855505453	0.109070042679992	0.170432417809683	0.473980863881022	NA	0.179808359177015	-0.219042768007003	0.0349337901093872	3	-0.00143353957353387	0.201897232311862	0.116565421423894	0.988840724108952
D6RHI9	0.0671700050320953	-0.413117745115478	0.0848450926087239	NA	3	-0.0870342158248864	0.282534870832198	0.163121583730425	0.551711737517993	0.792692292070766	0.0979697702495402	0.0317367624251871	0.17527686638186	NA	3	0.101661133018862	0.0718412136610607	0.0414775440461228	0.0326518400502528	0.211903899667968	-0.188171601363088	-0.483300526061854	-0.125873361620397	NA	3	-0.26578182968178	0.190934688113304	0.110236193579853	0.0345186230522426	0.298142278534084	-0.27386143631815	-0.161212570105739	0.126947928697037	NA	3	-0.102708692575617	0.206710097807325	0.119344130613273	0.350820167876645	0.647849338723945	-0.0672834170235763	-0.613645255425241	0.285660160798694	NA	3	-0.131756170550041	0.453106069119461	0.261600910977574	0.573440324099295
E5RGY0	0.0565835283663674	0.165007325552124	-0.0706959906709325	-0.062144521495872	4	0.0221875854379218	0.111534482002783	0.0557672410013915	0.704502520339467	0.877924517549767	-0.121268855229699	0.137036707683448	-0.0698902118023897	-0.0513338284838628	4	-0.0263640469581259	0.112878616613885	0.0564393083069423	0.656894163413781	0.835067727502043	0.172246313352433	0.0665337512557004	-0.103442315481069	-0.0620609681322516	4	0.0183191952487033	0.125572073937662	0.062786036968831	0.780286230224293	0.930914635365061	0.0377051678857486	-0.0159768525497681	-0.171414399891271	-0.109534952304593	4	-0.0648052592149708	0.0935572111624134	0.0467786055812067	0.215245584700785	0.527882853780607	0.154044873679423	0.272738669155643	-0.16615718775491	-0.0394301448285376	4	0.0552990525629045	0.195829186849238	0.0979145934246189	0.592702827996984
E5RK69	0.0927256578694983	0.0893825954137051	-0.119827698001812	-0.0761029790857917	4	-0.00345560595110003	0.110589137161553	0.0552945685807763	0.952198916474629	0.986674176716864	-0.00106747695649989	0.0417468288865637	-0.159975341034707	-0.0513338284838628	4	-0.0426574543971266	0.0869723619941924	0.0434861809970962	0.364503819258369	0.647087255220254	0.0335826005243807	0.0867116331933307	-0.0478708496191233	-0.0404250541847969	4	0.0079995824784478	0.0640742495308305	0.0320371247654152	0.811150470709	0.942735121405044	0.262285148459961	-0.0353855987358967	-0.224094716567449	-0.0205613224823165	4	-0.00443912233142529	0.200506048493917	0.100253024246958	0.96611872460671	0.986015160191115	0.17150344256354	-0.114801197051965	-0.198116929152455	-0.041248286267517	4	-0.0456657424770994	0.158327765777807	0.0791638828889037	0.585016840901031
E7EM64	-0.0678744786469354	-0.0349997093804599	-0.0200699176009645	-0.125012579566738	4	-0.0619891712987745	0.0465196794110272	0.0232598397055136	0.037270785697116	0.226699366523907	0.0327060048683098	-0.0805004386898216	-0.0285691521967709	-0.0949116470254669	4	-0.0428188082609374	0.0578521656710188	0.0289260828355094	0.189294241741094	0.485245057519371	0.00521770927101928	0.0232187095679472	-0.0132445065094908	-0.104289203521549	4	-0.0222743227980183	0.0566668805783276	0.0283334402891638	0.461689580953724	0.779850427825462	0.0200842460433324	-0.050115454846182	0.0402638702137272	-0.0379224831437538	4	-0.00692245543321907	0.0439034856970202	0.0219517428485101	0.763176763805153	0.896516688647952	0.0676794045007864	-0.0278552840528436	0.0239456956250324	-0.0874628412503393	4	-0.00592325629434105	0.0669308691145339	0.033465434557267	0.865334997048353
E7EMN6	0.0255566327457428	0.0322934032068844	0.159496041233642	NA	3	0.072448692395423	0.0754604315113784	0.0435671004462596	0.103570836766991	0.380430910749229	-0.167259759522482	-0.0696835554706704	0.346020325349323	NA	3	0.0363590034520566	0.272576373900347	0.157372042846098	0.793487846411701	0.909082581075108	0.0751109246950492	-0.0106787685260268	0.145017577407241	NA	3	0.0698165778587546	0.0779830790335969	0.045023551672283	0.123009465381978	0.483559965994435	0.0551134640622819	0.22737739424019	0.207244595040496	NA	3	0.163245151114322	0.0941842805856907	0.0543773197495798	0.0157383730417525	0.153240518659198	0.0752881273042372	0.312484847948399	0.0239456956250324	NA	3	0.137239556959223	0.153922692716488	0.0888673080742561	0.12421523102479
E7ENQ1	0.167877172793454	0.0322934032068844	-0.0546836726823016	0.0132445065094908	4	0.0396828524568818	0.0932602361317547	0.0466301180658774	0.427413460142534	0.721629464609871	0.109884731635707	-0.0549415363941109	-0.136006693208376	0.00179999404621017	4	-0.0198158759801426	0.103317651735798	0.051658825867899	0.714505543972826	0.868845639352315	0.0763508861301146	-0.060845555220527	-0.0853455550377862	0.154658244789002	4	0.0212045051652008	0.113924173161606	0.0569620865808028	0.722496136941461	0.912829450342818	-0.0112799248660028	-0.148828845649906	-0.0732844260352317	-0.0502008129221906	4	-0.0708985023683329	0.0579125782754733	0.0289562891377366	0.0498945478424212	0.267205640308749	0.161212570105739	0.0193436869837686	-0.0284484296293695	0.0262793247988489	4	0.0445967880647467	0.0814618377395547	0.0407309188697773	0.315549078100898
E7EPI8	NA	NA	NA	NA	0	NA	NA	NA	NA	NA	NA	NA	NA	NA	0	NA	NA	NA	NA	NA	NA	NA	NA	NA	0	NA	NA	NA	NA	NA	NA	NA	NA	NA	0	NA	NA	NA	NA	NA	NA	NA	NA	NA	0	NA	NA	NA	NA
E7EPT4	0.0387649193026594	-0.18416263600658	0.0862899550638817	0.373091530925114	4	0.0784959423212688	0.229067232065748	0.114533616032874	0.51870863877052	0.774462989135487	0.099962443274745	-0.0805004386898216	-0.0856959150761517	0.338760026392428	4	0.0681315289752999	0.200006112468927	0.100003056234464	0.521098463305711	0.760270586183959	-0.0518867416649687	-0.0171241777912091	-0.03623614913572	0.0576782761418441	4	-0.0118921981125134	0.0485098476762675	0.0242549238381337	0.641333616656448	0.871740792784371	0.216602333132935	0.208250475286352	0.0185938665752644	0.230632260867812	4	0.168519733965591	0.100376291788293	0.0501881458941465	0.0152719135702303	0.152366319217182	-0.240120013885792	-0.33251523555859	0.165222382477024	0.60718523908099	4	0.0499430930284079	0.429813565402235	0.214906782701117	0.823955887218518
E7EQ64	0.0706816376970557	0.14777062062682	0.330183445611252	NA	3	0.182878567978376	0.133265610917122	0.0769409363367204	0.0362080752814156	0.225164745349557	0.0148623320079062	-0.178776412692552	0.261091755682377	NA	3	0.0323925583325768	0.220457440368032	0.127281162541339	0.773242417981666	0.899822925269446	-0.107116262385361	0.521154531644768	0.377352133506054	NA	3	0.26379680092182	0.329168889518054	0.190045746972099	0.157999438739336	0.539088378452612	0.633572444945778	0.0788385177272157	0.13781281628856	NA	3	0.283407926320518	0.304681611769968	0.17590801057252	0.112113635532949	0.393222219904214	-0.0719447943934395	-0.431904953821718	0.091599519333844	NA	3	-0.137416742960438	0.267823011315944	0.154627687678437	0.336735815290218
E7EQ69	0.071850285019678	-0.0588136482734494	0.0497270493538055	0.0338147129922438	4	0.0241445997730695	0.0574626723477041	0.028731336173852	0.432913064424966	0.724637981039131	-0.00320480333391687	-0.0589471707329094	0.0934213721818396	-0.0272729301501037	4	0.000999116991227407	0.0657074634575744	0.0328537317287872	0.976725562390039	0.990273815596817	0.0130090605618627	0.0232187095679472	0.0965190597160515	0.00946032924906631	4	0.0355517897737319	0.0410611406896749	0.0205305703448374	0.134048590469756	0.503953915906578	0.068033207488014	0.0205088588004206	0.0286358679608878	0.035291912251201	4	0.0381174616251309	0.0208398583780323	0.0104199291890162	0.0106030431075487	0.132053438699863	0.138795103998141	-0.0278552840528436	0.108495295222943	0.0228029495242548	4	0.0605595161731238	0.076727616365833	0.0383638081829165	0.165514974014166
E7EQB2	-0.0550618274625417	-0.297640527695542	-0.129858063139076	-0.0385255212693154	4	-0.130271484891619	0.118443209764893	0.0592216048824464	0.0701283572440147	0.307832037018556	-0.0171751438081321	0.178456635063429	-0.169301133306801	-0.0420320874225182	4	-0.0125129323685055	0.143695316983793	0.0718476584918964	0.86746803501708	0.944722369561793	-0.0144467711062646	-0.273284502527551	-0.0694479281575776	-0.0680184234286511	4	-0.106299406305011	0.11422841742905	0.057114208714525	0.112041483744804	0.474371716191238	-0.0318087382306762	-0.588143747965836	-0.128007612376071	-0.200443448502803	4	-0.237100886768847	0.244008925346836	0.122004462673418	0.0999724798448105	0.376487100207804	-0.385725336132691	-0.241450757152133	-0.14597930581728	-0.106371303800404	4	-0.219881675725627	0.124251773674087	0.0621258868370435	0.0122293668316149
E7EQL5	NA	-0.0628211370749741	-0.0803893868747765	-0.0424352663203967	3	-0.0618819300900491	0.0189944833855648	0.0109664700957737	0.00108729965392784	0.0313038747983224	NA	-0.062963957664302	-0.0716378740886569	0.0302986005330386	3	-0.0347677437399734	0.0565157595217897	0.0326293889733615	0.258811769688631	0.561656841183584	NA	-0.00639777119815066	-0.165458813634867	0.0113449735940093	3	-0.0535038704130027	0.0973608403417309	0.0562113073798265	0.306823730132047	0.679010348601155	NA	-0.112302969624792	-0.196538994046887	-0.506333333298394	3	-0.271725098990025	0.207496252150679	0.119798017035033	0.0422252644256429	0.24831837200515	NA	0.0957440943885401	-0.10428635751732	0.0418201756946271	3	0.0110926375219492	0.103494838634739	0.0597527729455034	0.83318138226877
E7ES96	-0.120294233717712	0.0285314844106853	0.158122699824948	0.0113598621645478	4	0.0194299531706174	0.113880771885757	0.0569403859428784	0.744560522866795	0.899243492060057	0.292607521217141	-0.00643199924453228	0.0148988763793384	0.070303557846434	4	0.0928444890495952	0.137045858824499	0.0685229294122493	0.224226419995425	0.523021965776366	0.161770869693871	-0.0968024329969367	-0.101420317895857	-0.0326372077923516	4	-0.0172722722478187	0.123421321734138	0.0617106608670689	0.788959897740608	0.936741531440398	0.00448739099231388	-0.0733317381119601	-0.0396701454300211	0.0632424339918192	4	-0.011318014639462	0.0590440981148026	0.0295220490574013	0.714657679495533	0.877502097934605	0.205799267057869	0.118345523325673	-0.184333113719356	0.0245421842627915	4	0.0410884652317444	0.167518127311886	0.0837590636559432	0.641163455046462
E7ESC6	0.184178985122554	0.105542385237523	0.0243242017574888	0.0884687878623141	4	0.10062858999497	0.0657648192725735	0.0328824096362867	0.0222177119756505	0.174392108700479	-0.0160956861888317	0.0492090612522922	0.079315604875109	0.0214531096663175	4	0.0334705224012217	0.0406230658412923	0.0203115329206461	0.150479020465495	0.44030988946451	0.221271881442533	-0.136014783986926	0.0876844023412898	0.0972559337440798	4	0.067549358385244	0.14872443732115	0.0743622186605749	0.398691861244927	0.738961064710861	0.365314032048971	-0.046829132147511	0.116000596725835	0.0599821048282324	4	0.123616900363882	0.174715720288364	0.0873578601441818	0.206793736741833	0.520165773799612	0.0150236063285364	0.0572699465739046	0.106627728566176	0.149348639999072	4	0.0820674803669223	0.0584230518469853	0.0292115259234926	0.0307796292797602
E7EST9	0.379927649908443	0.142559193981479	-0.00460680021316022	0.046753768699742	4	0.141158453094126	0.170462552026076	0.085231276013038	0.148763677859677	0.451518672861248	-0.0107104800820008	0.126493213441979	-0.148863385914483	0.104210994988134	4	0.0177825856084073	0.126320498691654	0.0631602493458271	0.787748958062762	0.905552696969474	0.199814573361238	-0.0542022815899131	-0.195338181283496	0.0919224894410393	4	0.010549149982217	0.172264681936334	0.0861323409681668	0.906521322210744	0.980540348867052	-0.378062255537626	0.198591074987593	-0.146719872638242	0.0336307778812802	4	-0.0731400688267485	0.247406113979209	0.123703056989605	0.575930928330054	0.807532094778178	0.244557166584866	0.191224403242768	0.193650790803541	0.11384428567697	4	0.185819161577036	0.053916871345112	0.026958435672556	0.000460411653734822
E7ET15	-0.113636653648	-0.0728888334851722	-0.0594687352476784	0.0595778090573256	4	-0.0466041033308814	0.0744409097071239	0.037220454853562	0.257126198837865	0.572857672986489	-0.122429978061703	-0.0496179324165646	-0.114229750813125	-0.00903381186506125	4	-0.0738278682891134	0.0540951874897914	0.0270475937448957	0.0342062502873919	0.215917067304173	-0.00786211777297044	0.0169233030364685	0.0279781562170223	0.0667690122127011	4	0.0259520884233054	0.0310646944541006	0.0155323472270503	0.145788115976968	0.518838014426342	-0.223141678710281	-0.00477450532034729	-0.0119584643080549	0.00678916566263907	4	-0.0582713706690111	0.110184529705274	0.0550922648526368	0.330903363688548	0.633114473690177	-0.00980519402953361	0	0.0416476973584914	0.0707260521410043	4	0.0256421388674905	0.0374289096549476	0.0187144548274738	0.219686311735011
E7EU96	0.0846433115716397	0.0929893348944384	-0.0247413573248621	0.0813001021018482	4	0.0585478478107661	0.0557432986372373	0.0278716493186186	0.0804083163886682	0.334910190859416	-0.00320480333391687	0.0279650085359785	-0.00166496849511011	-0.0494686762642998	4	-0.00659335988933708	0.031980957561946	0.015990478780973	0.694424620630192	0.852310900871557	0.0960466874710343	0.0481291708742791	-0.140331414314087	0.0430128889600929	4	0.0117143332478297	0.104140122446514	0.0520700612232569	0.829466959028896	0.950304428319695	0.0551134640622819	0.0252005541251426	-0.0768687633842705	-0.0608089124881715	4	-0.0143409144212544	0.0644371662050941	0.0322185831025471	0.671846387354406	0.855875107025862	-0.174485040444878	0.19406435502773	-0.0595645539998068	0.0622842782543427	4	0.00557475970934688	0.15854437744574	0.0792721887228702	0.946220893180607
E7EUC7	-0.0525128956318465	0.0228701493202587	-0.0138647680742564	0.0393742383341444	4	-0.00103331901292494	0.0409020756726321	0.020451037836316	0.961342906240102	0.986674176716864	-0.00963584685474211	-0.00514330327595963	-0.0251785629959968	0.0285338357369732	4	-0.00285596934743134	0.022618699387532	0.011309349693766	0.809058764963827	0.916710886988624	-0.0397461787927565	0.0232187095679472	-0.0420417708169257	-0.00952277411850655	4	-0.0170230035400604	0.0306481664751299	0.0153240832375649	0.309148748956238	0.680875534457554	-0.00675736617530875	-0.0833970931784152	0.0202723950262611	0.0135465318379478	4	-0.0140838831223788	0.0476157978614748	0.0238078989307374	0.575737374400418	0.807532094778178	-0.0287112966415274	0.10784223690641	-0.0491177665646911	0.0622842782543427	4	0.0230743629886336	0.0744232670080602	0.0372116335040301	0.558002115646857
E7EVA0	-0.0821010802148937	-0.0850635474312744	0.186691852021719	0.181913351981378	4	0.0503601440892322	0.154680459080101	0.0773402295400504	0.539072113750222	0.78535662644189	-0.0632575342896768	0.0895753539771787	0.034527683128271	0.11921315832738	4	0.0450146652857883	0.0802577459231104	0.0401288729615552	0.304843780263204	0.601529208704742	-0.115586120612355	0.0501857571682166	0.119239136216135	0.0393231298110315	4	0.0232904756457569	0.0991182065704783	0.0495591032852392	0.654982930562711	0.877665513781505	0.0850815008897681	0.0863408489390465	0.0135465318379478	0.0762105666201186	4	0.0652948620717202	0.0347921778886531	0.0173960889443265	0.00947153786061356	0.125580960318574	-0.0196774847764661	0.0289191316987525	0.0802247294691871	0.133318530180123	4	0.0556962266428992	0.0658915235926994	0.0329457617963497	0.141879590523498
E7EVI4	NA	NA	NA	NA	0	NA	NA	NA	NA	NA	NA	NA	NA	NA	0	NA	NA	NA	NA	NA	NA	NA	NA	NA	0	NA	NA	NA	NA	NA	NA	NA	NA	NA	0	NA	NA	NA	NA	NA	NA	NA	NA	NA	0	NA	NA	NA	NA
E7EVX8	0.0730179864520124	-0.0708696658485201	-0.0294279722991986	-0.0641303374197157	4	-0.0228524972788555	0.0664426948246275	0.0332213474123138	0.517220665877723	0.773029684781973	0.105924001513462	-0.0982527076674412	0.0214715303028246	0.00179999404621017	4	0.00773570454876385	0.0838617726842927	0.0419308863421464	0.859709018107035	0.940267858805198	0.0310268956206242	-0.0431976894011025	0.107049727208221	0.0374747054186629	4	0.0330884097116014	0.0614093772265174	0.0307046886132587	0.322604666479561	0.696098434523707	-0.0318087382306762	0.0407302524187469	0.0922585078519886	-0.0379224831437538	4	0.0158143847240764	0.0622364235047341	0.0311182117523671	0.629449085478638	0.828578468832414	0.0026626184873515	-0.0749404201225849	-0.0637645425290922	-0.0231691644541809	4	-0.0398028771546266	0.0360037361564177	0.0180018680782088	0.069044205734666
E7EVZ5	0.0565835283663674	0.288108826080783	0.055639742223697	-0.0983142581759503	4	0.0755044596237242	0.159338394547745	0.0796691972738725	0.379859939021243	0.680235147286924	0.0849498724197203	0.0627903728891259	0.133413347638728	0.00718654059326923	4	0.0720850333852109	0.0523605172274085	0.0261802586137042	0.0331416942310396	0.212261317077188	0.0259018634427571	0.0336503894419168	0.0554240386186918	0.06313958881201	4	0.0445289700788439	0.0176103214661699	0.00880516073308496	0.00231720888951733	0.0699978251770427	0.169425539764868	0.0848435005525442	-0.0714955912854187	-0.0679245621332215	4	0.0287122217246929	0.118787249763876	0.0593936248819378	0.645930646635407	0.838253193773922	-0.318822184019541	0.215187646593484	0.123349429440075	0.00176692617418783	4	0.00537045454705148	0.233135257531303	0.116567628765652	0.964748343136243
E7EW05	-0.981699183257056	NA	0.0659290016152019	-0.298829396266048	3	-0.404866525969301	0.531802696581602	0.307036430027157	0.175833822809492	0.483090614540093	-0.619519722757525	NA	-0.186240995728513	-0.112328700102876	3	-0.306029806196305	0.273993982963739	0.158190499820452	0.0687144057289072	0.294226131046015	-1.28515721673193	NA	-0.263787968160088	-0.171111916392755	3	-0.573352367094925	0.618180249294547	0.356906533337917	0.112917877545141	0.476746848909165	-0.0596429464274019	NA	-0.0572642054447594	-0.12244093650153	3	-0.0797826961245637	0.0369622605668254	0.0213401710881138	0.00658839686980205	0.101100120494475	-1.23697574448089	NA	0.0859233348016408	0.0874628412503395	3	-0.354529856142968	0.764220944428637	0.441223167986224	0.380968768876211
E7EW49	0.159106963165722	0.0583556997930805	-0.106561443227938	0.123787443755808	4	0.058672165871668	0.117798406395965	0.0588992031979825	0.357641282849718	0.663281961996747	0.116789951851627	0.0504490226873575	0.107390556487827	0.169724863404828	4	0.11108859860791	0.048858812448013	0.0244294062240065	0.00390284063475229	0.0751483263621413	0.0701403942283026	-0.0854693421893495	0.0242789361367121	0.127111917903339	4	0.0340154765197511	0.0900802960295511	0.0450401480147755	0.47870074864657	0.793373006117643	0.173416399960902	0.042274067484084	0.0842568509512482	0.011860155210061	4	0.0779518684015739	0.0702240453161425	0.0351120226580713	0.0681894348064341	0.315676357457657	-0.0423689723946661	-0.0278552840528436	0.00201072512114664	-0.117836490293858	4	-0.0465125054050553	0.051012663445824	0.025506331722912	0.11803555105406
E7EWW0	0.10647662812931	NA	0.138757374958017	0.302408644167938	3	0.182547549085089	0.105050098713898	0.0606507027708658	0.015585586403244	0.14769663854861	-0.34695355475108	NA	-0.0577154978562874	-0.129958594124668	3	-0.178209215577345	0.150534897090329	0.0869113633575341	0.0578807563730539	0.273823985157656	-0.0384035123013466	NA	0.180350650519522	0.0188590272513159	3	0.0536020551564972	0.113440091805675	0.0654946675409023	0.372901345300793	0.722615876182242	-0.197146470177337	NA	-0.0554951125917036	-0.163770964577467	3	-0.138804182448836	0.07405256196687	0.0427542665857539	0.011637462034119	0.136091265664165	-0.329945562491251	NA	0.101010479259922	0.205625570757041	3	-0.00776983749142944	0.283873171815528	0.163894252163408	0.957008332138605
E7EX17	-0.0436269324002582	-0.124308924809981	-0.12149459020445	-0.0307376748768701	4	-0.0800420305728897	0.0497823646516442	0.0248911823258221	0.0182361332816834	0.161603285350342	0.0169730786037136	0.0191257114871856	0.173802471730399	0.115892800035769	4	0.0814485154642667	0.0769347685414384	0.0384673842707192	0.0785717533036795	0.318394651792256	0.0462936522739347	-0.00853668195448543	-0.0208677477125158	0.0667690122127011	4	0.0209145587049086	0.042268451603297	0.0211342258016485	0.360580452726794	0.717154868507464	0.00448739099231388	-0.0208046151392962	0.00170028898983932	0.045218752156492	4	0.00765045424983724	0.0274862233208805	0.0137431116604402	0.597883459024768	0.818199047818865	0.195750988810217	0.0241393535854178	-0.0574691359976134	0.0123232784501301	4	0.043686121212038	0.107582238387756	0.053791119193878	0.447724192913404
E7EX90	-0.0135696985440784	0.0416555064105756	-0.0451608985637949	-0.0172092900322231	4	-0.00857109518238019	0.0363369860468162	0.0181684930234081	0.653767768378253	0.854079500348945	0.0138057995250304	-0.0549415363941109	-0.0439261929666908	-0.0494686762642998	4	-0.0336326515250178	0.0319437624967519	0.0159718812483759	0.0798414263933625	0.32010693897498	0.0886922363318829	0.0501857571682166	-0.00377175388920842	0.0151068923902083	4	0.0375532830002749	0.0407691512330624	0.0203845756165312	0.11502051968589	0.477019629644359	-0.0135465318379479	-0.027266865768993	-0.00340660144324945	0.0185938665752644	4	-0.00640653311873149	0.0193231522178887	0.00966157610894434	0.531903879113587	0.779094431734049	0.182504438445537	-0.00650596385941019	-0.0512010810651801	0.00705475753395046	4	0.0329630377637243	0.102754189678922	0.0513770948394612	0.544854228033711
E9PB61	-0.0499684592740848	-0.0728888334851722	-0.0966911992038771	0.0449124218755744	4	-0.0436590175218899	0.0620524062583708	0.0310262031291854	0.209010833262675	0.519033959151701	-0.0400323521025198	-0.0416691793010737	-0.042211760155439	-0.0181245479359183	4	-0.0355094598737377	0.0116269039973174	0.0058134519986587	0.000878048578975173	0.0373850824541119	-0.164544542434431	0.090713563750827	0.105299945258261	-0.0326372077923516	4	-0.000292060304423518	0.125773316857909	0.0628866584289544	0.996445014443954	0.999420464055764	0.0486099442246216	-0.0240321221696921	-0.00853163362111692	-0.0102440314968031	4	0.00145053923425236	0.0321961812992984	0.0160980906496492	0.931135430250033	0.970963230647068	-0.00266754166763483	-0.0495252876913065	0.0100257181852663	0.0537928173607031	4	0.00290642654675701	0.0425059323824365	0.0212529661912183	0.895698649904889
E9PB90	0.0303736490435187	0.0766875225653379	-0.0341298614395021	0.0037965680880791	4	0.0191819695643584	0.0465868515752503	0.0232934257876251	0.441722922795689	0.731686792115818	0.00745030448520684	-0.0750818593965014	-0.0698902118023897	-0.00180224263398543	4	-0.0348310023369174	0.0436954899902936	0.0218477449951468	0.161987420549357	0.453358951817122	0.0563824698975185	0.00848646588782864	0.0353482618540323	0.0411691889764045	4	0.035346596653946	0.0199823019362887	0.00999115096814433	0.0122516152704266	0.19492964717105	0.0615877982228317	-0.0305088784611451	0.00339857646186492	0.0286358679608878	4	0.0157783410461098	0.0389854144779996	0.0194927072389998	0.449158040525247	0.722025429951319	-0.00266754166763483	0.0161376966846774	-0.072201379677732	0.033207045389919	4	-0.00638104481769262	0.0462616370652465	0.0231308185326233	0.791904987940824
E9PC47	NA	NA	NA	NA	0	NA	NA	NA	NA	NA	NA	NA	NA	NA	0	NA	NA	NA	NA	NA	NA	NA	NA	NA	0	NA	NA	NA	NA	NA	NA	NA	NA	NA	0	NA	NA	NA	NA	NA	NA	NA	NA	NA	0	NA	NA	NA	NA
E9PC62	0.17876548893619	0.0546612162353389	0.110633774043629	0.079502351039454	4	0.105890707563653	0.0537092064781404	0.0268546032390702	0.00759744048461794	0.0947633974322307	0.0768788301617036	0.024183367993552	-0.0116953336323747	0.0338216670967358	4	0.0307971329049042	0.0364326878314391	0.0182163439157196	0.141862175389806	0.430558867898435	0.0775897827634734	0.0253110885291873	-0.0189581577038844	-0.0287589929814239	4	0.0137959301518381	0.0486004329803371	0.0243002164901686	0.590814183891388	0.843457413750529	-0.00675736617530875	0.0376376573633653	-0.0274807364221071	-0.0466820427853945	4	-0.0108206220048613	0.0361861658651464	0.0180930829325732	0.57167247500768	0.807532094778178	0.116023796339483	0.113853474940272	0.039691500393165	0.207157907641288	4	0.119181669828552	0.0685489296835723	0.0342744648417861	0.013186273975247
E9PCW1	-0.0210255034631256	-0.19072532377903	0.0992290107713798	-0.0019020372443746	4	-0.0286059634287877	0.120270570903114	0.060135285451557	0.651117247929805	0.852053369936509	-0.0291027919442606	-0.127399053326958	0.0554951125917036	0.00718654059326923	4	-0.0234550480215614	0.0774774979462759	0.0387387489731379	0.567049469596485	0.783737111715246	-0.0847701034787522	-0.0431976894011025	0.0261297318246536	-0.0306967972229165	4	-0.0331337145695294	0.045773700213352	0.022886850106676	0.19785339312124	0.587343235851509	-0.0433411340983013	-0.0370148423205552	0.00678916566263907	-0.0466820427853945	4	-0.030062213385403	0.0248925132749899	0.012446256637495	0.0521915207870875	0.27191916941685	-0.0305248670134586	-0.170330765765305	0.150795311841744	0.0280143761695966	4	-0.0055114861918556	0.133350243966572	0.0666751219832861	0.936809173376922
E9PDF6	0.0765154306882395	0.340632433346292	0.0717757980305741	0	4	0.122230915516276	0.149750063029436	0.0748750315147179	0.153701388301674	0.45642367076224	-0.0688428879205336	-0.123199064797672	-0.00834412413273689	0.0196774847764661	4	-0.0451771480186191	0.0637972877859915	0.0318986438929957	0.206456378590176	0.504949540839888	-0.00261594820701144	0.0169233030364685	-0.0853455550377862	-0.0133495536590197	4	-0.0210969384668372	0.044628064666361	0.0223140323331805	0.380926769891595	0.725152157041746	0.052948879948959	-0.0386459278994835	-0.0732844260352317	-0.0119584643080549	4	-0.0177349845734528	0.0533934605474593	0.0266967302737297	0.531175704869849	0.778731404375147	-0.0775584008569662	-0.00976998118130398	0.1954091030759	-0.0485438519580369	4	0.0148842172698982	0.12351224164521	0.061756120822605	0.817567426796495
E9PDI2	-0.214026582651224	-0.107654251645849	0.0761453976583385	-0.275634442613427	4	-0.13029246981304	0.154126325631739	0.0770631628158693	0.14184433018557	0.442119826881698	-0.0334646850353568	-0.0791438847197366	0.0634790568244001	-0.290307335983897	4	-0.0848592122286477	0.149317598889261	0.0746587994446306	0.299043215393531	0.597543780216261	-0.100095834707588	-0.0366350016286522	0.0353482618540323	-0.194816176984023	4	-0.0740496878665578	0.0976912087623942	0.0488456043811971	0.180304903665171	0.569098005152396	-0.349149563622387	0.113030727023778	0.245059331503092	0.0101718050572912	4	0.00477807499044355	0.254785913138616	0.127392956569308	0.971297850729027	0.988963759768895	0.158827292558982	0.104827199150979	-0.377304851923735	-0.0931094043914814	4	-0.0516899411513142	0.242594148699619	0.121297074349809	0.684867582142067
E9PE17	NA	0.0360455380679919	-0.0200699176009645	0.0759001143592584	3	0.0306252449420953	0.048214068919658	0.0278364056694917	0.245595624582796	0.55917779960894	NA	0.23517102605775	-0.18813553971829	-0.089152377736782	3	-0.014038963799107	0.221424097316226	0.127839262190593	0.900690042482214	0.960079689148002	NA	0.0806878455655607	0.0787953105050205	-0.0800076478916501	3	0.0264918360596437	0.0922361126872645	0.0532525444889968	0.577996125153148	0.842346726279383	NA	-0.0143711817764677	0.117569596381176	0.190942782711395	3	0.0980470657720346	0.10403991015216	0.060067470132814	0.108537992507126	0.389217498634689	NA	0.0820113038987667	0.110360447442506	0.0520885111484542	3	0.0814867541632422	0.0291395093332622	0.0168237035576126	0.00216532638849262
E9PE82	-0.216877759549348	0.598347441377976	0.0848450926087239	0.0759001143592584	4	0.135553722199153	0.33887849045642	0.16943924522821	0.454202994539943	0.738996583689045	-0.269022475673391	0.838553465845365	-0.288212968829791	-0.0309485882935019	4	0.0625923582621702	0.530376697818471	0.265188348909235	0.821260207447974	0.921555162255094	-0.139857663582961	1.04090794358021	0.261149761488851	0.0990293759352991	4	0.315307354355349	0.511005746038404	0.255502873019202	0.263319697529	0.642340932545152	-0.192003166901377	0.850290119183238	-0.297467902897668	-0.0379224831437538	4	0.0807241415601099	0.523996890175397	0.261998445087699	0.768415362185842	0.896516688647952	-0.09737984176971	0.663392009807527	0.262363540887556	0.031478231473168	4	0.214963485099635	0.333946152944141	0.16697307647207	0.245377392159118
E9PF06	NA	0.0638797462647176	-0.131536591590073	-0.0741006261746439	3	-0.0472524904999998	0.100436562401585	0.0579870763390358	0.374804381088009	0.67619613901261	NA	0.024183367993552	-0.010018755824991	-0.00722251841823834	3	0.00231403125010754	0.0189909360777019	0.0109644220566241	0.810887548019782	0.916754512038518	NA	-0.0301020317894192	-0.101420317895857	0.0113449735940093	3	-0.0400591253637558	0.0570382373985621	0.0329310417161616	0.205706699283131	0.591614143431961	NA	-0.0256485873706103	0.0303027601635257	0.050156674972159	3	0.0182702825883582	0.0393089663710673	0.0226950423159017	0.380140503935875	0.671638034777977	NA	0.10784223690641	-0.193507675899866	-0.0394301448285376	3	-0.0416985279406644	0.150687762139283	0.0869996200346972	0.591532687602475
E9PF32	0.12686041363732	0.0620407466009365	0.0615283015861564	-0.0133672237378289	4	0.059265559521646	0.0573219189371533	0.0286609594685766	0.084141477245371	0.341361667097844	0.0232868525359158	-0.0764345974617503	0.139468739701276	-0.147806595457592	4	-0.0153714001705377	0.124816831706818	0.0624084158534092	0.8136573190353	0.91711174505479	0.117887736010616	-0.0257630960650818	-0.125873361620397	-0.0720037713798301	4	-0.026438123263673	0.104553023600922	0.0522765118004609	0.631079876021797	0.866767135490183	0.112362365455958	-0.107159666348833	-0.115051957272158	-0.0786642770458846	4	-0.0471283838027296	0.107469652117436	0.0537348260587179	0.414190395999043	0.699746351110267	0.0651342199990442	-0.0295107002309054	0.0706767459700235	-0.0303736490435186	4	0.0189816541736609	0.0565387661681744	0.0282693830840872	0.526921490631804
E9PFH4	-0.0808019400632702	0.00383695715765636	0.114887423437277	0.129011450818821	4	0.041733472837621	0.0990286477815004	0.0495143238907502	0.431618713554589	0.724477846793104	-0.115477217419936	-0.0154852474974187	0.0442428379614828	0.0582451410359534	4	-0.00711862147997966	0.078997904426195	0.0394989522130975	0.862910414303829	0.942405412731385	-0.121260444705631	-0.0149725069361604	0.0316679153660836	0.0558532347335175	4	-0.0121779503855475	0.078437878191641	0.0392189390958205	0.766675215657768	0.927111954454424	-0.0135465318379479	-0.0127672960738779	-0.0102440314968031	-0.0326921630674488	4	-0.0173125056190194	0.0103495358668305	0.00517476793341527	0.0155044168290998	0.153240518659198	-0.198749579465932	0.00647675629145292	0.23526988000528	0.0724084955280501	4	0.0288513880897129	0.179637264131049	0.0898186320655247	0.75893958258394
E9PFP8	0.143629626546776	-0.134816582628374	-0.116499680284057	-0.0581810710885293	4	-0.041466926863546	0.127650785372736	0.063825392686368	0.539951039451811	0.7862581850977	0.0253853184199134	-0.0576107231700952	0.0618857987487328	0.0685870852574124	4	0.0245618698139908	0.0579778934057347	0.0289889467028674	0.429332392868861	0.694800678813786	0.0886922363318829	-0.0945286814768157	0.198518773218447	-0.0133495536590197	4	0.0448331936036236	0.126951220705104	0.063475610352552	0.506484866787121	0.804101269468651	-0.00901687335743373	-0.0386459278994835	0.0890631686921818	0.166897308744744	4	0.0520744190450022	0.0940120399321077	0.0470060199660539	0.310360552124683	0.616048213312576	-0.146682761511786	-0.143194635827791	-0.00604904467280504	-0.119756244457224	4	-0.103920671617401	0.0663341574275826	0.0331670787137913	0.020240851859816
E9PFR3	0.071850285019678	-0.153925405576078	0.183995224991954	0.237787796736152	4	0.0849269752929265	0.173591866654731	0.0867959333273653	0.365631100074645	0.669937682434139	0.00532556913666971	0.113501193222659	0.0602907791933528	0.172923745072148	4	0.0880103216562074	0.0717988285489379	0.035899414274469	0.0496839837405395	0.254308372244239	-0.0696054674858668	0.0106003051537465	0.0242789361367121	0.0595010117486618	4	0.00619369638831344	0.0545700687572749	0.0272850343786374	0.827960535372908	0.95023716721044	-0.0952083064111178	0.0453567503682719	-0.0519634216214504	0.112857469031855	4	0.00276062284188975	0.0940361238436718	0.0470180619218359	0.95508648824543	0.981715897302257	-0.0287112966415274	0.046310734584038	0.214610409439187	0.256833066665478	4	0.122260728511794	0.135645532817539	0.0678227664087694	0.121505625259009
E9PG73	-0.160898087490184	-0.130604331341459	-0.205625570757041	-0.131244533278253	4	-0.157093130716734	0.03530666563221	0.017653332816105	0.000112197241936631	0.0084793065593609	0.0472368691272787	-0.0764345974617503	-0.130531563142225	-0.0968365239499591	4	-0.064141453856664	0.0775303519699758	0.0387651759849879	0.14908498302004	0.438393175592461	0.00130619750062472	-0.0322764030237561	0.0335092621902512	-0.00761318410987516	4	-0.00126853186068884	0.0271898686803381	0.0135949343401691	0.928695737848829	0.985796402916747	-0.0226487389452003	-0.0451887737662554	0.00509486712276347	-0.0257477691976516	4	-0.022122603696586	0.0207063401135578	0.0103531700567789	0.0764881297850128	0.332239816225129	-0.0368903770479952	0	-0.228441466009253	-0.180572245641821	4	-0.111476022174767	0.110219667222163	0.0551098336110816	0.0895527463414788
E9PGT6	0.305380696543389	-0.24660740808593	NA	0.291578710967187	3	0.116783999808215	0.314781845410323	0.181739383183657	0.477148370329326	0.749075450399303	0.336367906745554	-0.232051205734901	NA	0.362770189661871	3	0.155695630224175	0.336057996085503	0.194023174503291	0.381546326486016	0.661740989654175	-0.0184120371138804	-0.227721925147107	NA	0.0430128889600929	3	-0.0677070244336316	0.141939535449275	0.0819488290002892	0.368738926949618	0.721268583350963	-0.0112799248660028	-0.0901465559726249	NA	0.1409021002118	3	0.0131585397910574	0.117447006335849	0.067808060723518	0.825777842893004	0.924565340394648	0.239298704482974	-0.28428695506239	NA	0.313416595031845	3	0.0894761148174763	0.325802838737434	0.188102356647802	0.59424930364507
E9PHY5	-0.0537867986204799	-0.139041168490099	-0.0499144285344295	-0.0424352663203967	4	-0.0712944154913513	0.0454095934193063	0.0227047967096532	0.0200663816937096	0.169212606544819	0.00532556913666971	-0.0589471707329094	-0.042211760155439	-0.00722251841823834	4	-0.0257639700424792	0.0298998298900804	0.0149499149450402	0.135594903925278	0.425652538490253	0.0207585601667974	-0.0214371706622917	-0.0170510919392254	-0.00952277411850655	4	-0.00681311913830656	0.0190282132622741	0.00951410663113703	0.500833152980793	0.801492123589697	0.0111924148702044	-0.0191935652333109	-0.00170229523100057	-0.00170229523100057	4	-0.00285143520627691	0.0124757896764991	0.00623789483824956	0.66367169222071	0.84992656838981	0.0402964701762382	-0.179490765050781	-0.0658691308540155	-0.0762355858270852	4	-0.0703247528889108	0.0898314416328266	0.0449157208164133	0.168456781597284
E9PI99	NA	NA	NA	NA	0	NA	NA	NA	NA	NA	NA	NA	NA	NA	0	NA	NA	NA	NA	NA	NA	NA	NA	NA	0	NA	NA	NA	NA	NA	NA	NA	NA	NA	0	NA	NA	NA	NA	NA	NA	NA	NA	NA	0	NA	NA	NA	NA
E9PJA2	0.0423462907095947	NA	0.112053051128963	0.163362955609598	3	0.105920765816052	0.0607409416147718	0.0350687989921199	0.0153798844096059	0.147104670015823	0.00532556913666971	NA	0.0116012862787634	0.156857932712513	3	0.0579282627093153	0.0857330499960083	0.049497999493643	0.220743521516481	0.519305576299082	0.0563824698975185	NA	-0.0189581577038844	0.168236651289543	3	0.0685536544943922	0.0941890515367353	0.0543800742594497	0.192229213480233	0.580925316575829	0.286439010168738	NA	-0.188761643455168	0.154722594798642	3	0.0841333205040706	0.245338642564155	0.141646331327032	0.509477168454836	0.766159338165687	-0.187577650741288	NA	0.039691500393165	0.0757675076179648	3	-0.0240395475767195	0.142772206554076	0.0824295718867928	0.741607135012087
E9PK25	-0.158155320426645	-0.156064316332413	-0.0499144285344295	-0.141691320713368	4	-0.126456346501714	0.0515500613343617	0.0257750306671808	0.00269410606166511	0.0499444970615628	-0.0902666546226562	-0.107902877701161	-0.0733876560386167	-0.176016615169194	4	-0.111893450882907	0.0450115519449471	0.0225057759724736	0.00252239215728569	0.0635432624289552	-0.0410900960216473	0.0378020327123842	0.0224257630612349	-0.0640440544113535	4	-0.0112265886648454	0.0490503151548859	0.0245251575774429	0.663235092912403	0.882991011416102	0.0245096944241276	-0.00318124724467991	-0.129867954401599	-0.0894845405727273	4	-0.0495060119487197	0.0722971487692673	0.0361485743846337	0.219882204703433	0.531146453717842	-0.0983305469381429	-0.192413263843578	-0.21436628079753	-0.348244795352754	4	-0.213338721733001	0.103062213629529	0.0515311068147646	0.00607862768481255
E9PK91	0.146960205265433	-0.14327816137657	-0.030993566637201	-0.11880743004003	4	-0.0365297381970919	0.131483906459723	0.0657419532298615	0.598539667421307	0.822821925700142	0.109884731635707	-0.0669919594644044	0.039393438300087	0.00359774510860439	4	0.0214709888949984	0.073673491781835	0.0368367458909175	0.581210558610384	0.791441224630266	0.127489735121916	0.0148187147115452	0.0929916862207262	0.0393231298110315	4	0.0686558164663046	0.0510310512428397	0.0255155256214198	0.0360168390665176	0.302019029405907	0.0701752940595554	0.0126553008060289	0.0938535274073686	0.00339857646186492	4	0.0450206746837045	0.0439595225470932	0.0219797612735466	0.0864478019082858	0.349948863640432	0.200397353666583	-0.0328272420153698	0.121501005047706	0.0210616155278296	4	0.0775331830566871	0.103918614231752	0.0519593071158758	0.186251566885249
E9PKG1	-0.0576152706793613	-0.0628211370749741	-0.0578719503133489	-0.0210616155278296	4	-0.0498424933988785	0.0193362558224407	0.00966812791122033	0.00210426363884652	0.0457639494980795	-0.0128621509370496	0.0165902186713217	-0.0370806520522884	-0.0364796942667308	4	-0.0174580696461868	0.0253461131117594	0.0126730565558797	0.217512972832065	0.516935312005766	-0.0223882317508601	-0.00212943956134715	0.0149891742194532	0.0188590272513159	4	0.00233263253964048	0.0188356133265568	0.00941780666327838	0.812637810775772	0.943396352525022	-0.00224894050356217	0.00317424779514364	-0.00170229523100057	-0.0240168811185356	4	-0.00619846726448868	0.0121265271815298	0.00606326359076492	0.34607677127098	0.642154193091499	-0.0524674198941356	-0.0545726224286231	-0.115141901894687	-0.123603433512744	4	-0.0864463444325475	0.0381863228313803	0.0190931614156901	0.00398525677521651
E9PKI3	NA	NA	NA	NA	0	NA	NA	NA	NA	NA	NA	NA	NA	NA	0	NA	NA	NA	NA	NA	NA	NA	NA	NA	0	NA	NA	NA	NA	NA	NA	NA	NA	NA	0	NA	NA	NA	NA	NA	NA	NA	NA	NA	0	NA	NA	NA	NA
E9PKK4	NA	-0.091189650228116	0.21998117023199	0.134216609950081	3	0.0876693766513185	0.160722753747816	0.0927933251411993	0.310046897221695	0.621857594023554	NA	0.0701448240282773	0.00166304922264432	0.188812617575512	3	0.0868734969421445	0.0946896330479769	0.0546690851297164	0.115965537753014	0.392568668115747	NA	0.0726168033075441	0.0680555955923575	-0.168976172048763	3	-0.00943459104962063	0.138185882798261	0.0797816566317822	0.893118024160726	0.975551336684531	NA	-0.0305088784611451	0.147060893090575	0.237863830098888	3	0.118138614909439	0.136504034029593	0.0788106407924555	0.133178324493398	0.422972714317632	NA	0.163962323238311	0.218074264742759	0.278859372995476	3	0.220298653658849	0.0574808136708473	0.0331865632461024	0.000512372558723715
E9PKP7	-0.0260175328068798	-0.0993984635036487	-0.10986658795161	-0.0781081149761686	4	-0.0783476748095768	0.037305400597562	0.018652700298781	0.00568366890243795	0.0784761305671747	0.0534198573377148	0.0578664942498406	-0.0874628412503395	0.0390901880129154	4	0.0157284245875328	0.0692591037414167	0.0346295518707083	0.665658788237542	0.837875987822392	0.123896470397907	0.0624640869466534	0.0371849203336494	0.0829893646710316	4	0.0766337105873104	0.0366567323982071	0.0183283661991036	0.00580604279404999	0.129038589966134	0.0658879356564572	0.0637157897301943	0.0369511361728915	0.100216029630908	4	0.0666927227976128	0.0259350720635559	0.012967536031778	0.00212965458482019	0.0545588627958595	0.0290219700362755	-0.114801197051965	-0.115141901894687	0.0418201756946271	4	-0.0397752383039374	0.086986389601795	0.0434931948008975	0.395709689898929
E9PKV2	NA	NA	NA	NA	0	NA	NA	NA	NA	NA	NA	NA	NA	NA	0	NA	NA	NA	NA	NA	NA	NA	NA	NA	0	NA	NA	NA	NA	NA	NA	NA	NA	NA	0	NA	NA	NA	NA	NA	NA	NA	NA	NA	0	NA	NA	NA	NA
E9PL71	NA	NA	NA	NA	0	NA	NA	NA	NA	NA	NA	NA	NA	NA	0	NA	NA	NA	NA	NA	NA	NA	NA	NA	0	NA	NA	NA	NA	NA	NA	NA	NA	NA	0	NA	NA	NA	NA	NA	NA	NA	NA	NA	0	NA	NA	NA	NA
E9PLK3	-0.0385737046739728	0.00575161575439248	0.0122133642925727	-0.0210616155278296	4	-0.0104175850387093	0.0236619623016301	0.011830981150815	0.412446940132671	0.706818083912169	-0.0160956861888317	-0.00772184737773601	-0.00166496849511011	-0.0144813767047317	4	-0.00999096969160236	0.00663080011899974	0.00331540005949987	0.0235937348711989	0.181485650167008	0.00391505000338302	0.0253110885291873	-0.0056613350904266	0.00189703517259759	4	0.00636545965368533	0.0132859822131289	0.00664299110656444	0.374953517257439	0.723320526725183	-0.0180904569828959	0.00792256269330702	-0.0414199273799808	-0.0431718341415736	4	-0.0236899139527858	0.0239763855242905	0.0119881927621453	0.0955384701941045	0.367905583576292	-0.0432840977288	0.0541472288160043	-0.0284484296293695	0.0280143761695966	4	0.00260726940685783	0.0460881854353085	0.0230440927176542	0.913608166740177
E9PM00	-0.163646078875095	0.44309805336353	0.0467615908772442	0.215042133504947	4	0.135313924717657	0.257103258568414	0.128551629284207	0.333055569855955	0.640234784931171	-0.152951922838599	0.504009593769546	-0.00166496849511011	0.0974929617037896	4	0.111721416034907	0.281069927129801	0.1405349635649	0.456915242728966	0.716418453718706	-0.122682519774829	0.321076696195855	-0.197496289450905	-0.0443347992358782	4	-0.0108592280664393	0.229956454523976	0.114978227261988	0.927830019586547	0.985796402916747	-0.146520397107369	0.0468956252244614	-0.0240168811185356	-0.0449258708815163	4	-0.0421418809707398	0.0799141588618912	0.0399570794309456	0.332178789689796	0.633994935451807	0.0853710690397719	0.266006528890721	0.102885326880359	-0.0394301448285376	4	0.103708194995578	0.125387746361699	0.0626938731808495	0.149170336239467
E9PM19	-0.346696000036305	-0.111799929903402	0.360353826596542	NA	3	-0.0327140344477215	0.360098317797244	0.20790286071497	0.858214668465339	0.945819519785169	-0.53051471669878	-0.0818582694167725	-0.0594484650807429	NA	3	-0.223940483732098	0.265737408115468	0.153423564109219	0.141506805269555	0.430558867898435	-0.363690619278624	-0.0366350016286522	-0.621198649856876	NA	3	-0.340508090254717	0.292970539383111	0.169146619777469	0.0611573950731158	0.377303684298019	-0.357762693927095	-0.0143711817764677	0.0169133829363464	NA	3	-0.118406830922405	0.207877615108884	0.120018197041612	0.291374721369131	0.60042657307354	-0.542507922377509	-0.128928066754742	0.0802247294691871	NA	3	-0.197070419887688	0.316909331097833	0.182967687618038	0.254338440132305
E9PNF5	0.0375691504477226	0.3986156174527	0.156748049848731	-0.480493234165127	4	0.0281098958960067	0.370849873382418	0.185424936691209	0.884473475272471	0.958641339279932	0.378019039726192	0.345353943808173	0.142486931264191	-0.362570079384708	4	0.125822458853462	0.341858725371445	0.170929362685722	0.489431979574064	0.738033356155507	-0.121260444705631	0.354746720085491	-0.163348067039059	-0.250183487383953	4	-0.0450113197607881	0.27185757521184	0.13592878760592	0.751798760114814	0.923785768923571	-0.00675736617530875	-0.0305088784611451	-0.272593234258639	-0.167587620350758	4	-0.119361774811463	0.124338519610014	0.0621692598050071	0.103273508714734	0.381191473558782	0.584370139784528	0.430372583959016	-0.474602053278651	-0.375509135092206	4	0.0411578838431717	0.543503252121385	0.271751626060692	0.884581576402117
E9PNJ4	-0.100412958491835	-0.0708696658485201	0.10065954637782	0.079502351039454	4	0.00221981826922975	0.102532156737548	0.0512660783687741	0.966867463716972	0.987446061762299	-0.121268855229699	-0.236580864215415	0.113555929293541	-0.0346336351013579	4	-0.0697318563132326	0.147558972595288	0.073779486297644	0.381076178107155	0.661304986462646	-0.0197362180612624	0.0294867645003806	0.020570206482753	-0.216708782832865	4	-0.0465970074777485	0.115411861193123	0.0577059305965616	0.450201514510221	0.772729238794042	0.230076567549625	-0.0517614276897416	0.16234382245791	0.00339857646186492	4	0.0860143846949146	0.132145931765266	0.066072965882633	0.240724814456676	0.556027783827188	-0.193660702793132	0.00809141235354779	0.326347996812543	-0.114004628702831	4	0.00669351941753182	0.228685224956827	0.114342612478413	0.955220132143059
E9PNL8	NA	0.197200329882572	-0.15524338155899	0.0650391217274915	3	0.0356653566836912	0.178048465279294	0.1027963293578	0.69556325911568	0.873637662751965	NA	-0.0791438847197366	-0.152557869472224	-0.135883428081773	3	-0.122528394091245	0.0384859843186549	0.0222198934064031	0.00120784475730255	0.0424571476898328	NA	0.222392421336448	-0.127929947914334	0.130584109810144	3	0.0750155277440861	0.181651702672985	0.104876659437002	0.431644749387004	0.767692982397543	NA	0.0345384187044788	-0.146719872638242	-0.0102440314968031	3	-0.0408084951435221	0.0944154747572101	0.0545107997667416	0.411900485241561	0.698359600047807	NA	0.19406435502773	0.287309898017787	-0.0503735225151192	3	0.143666910176799	0.174391656799652	0.100685069997704	0.148824701790017
E9PNM1	0.245534501148891	0.128569314263533	0.0258309330076435	-0.0210616155278296	4	0.0947182832230594	0.118380566910878	0.0591902834554389	0.160664461238608	0.464329508914256	0.314224572953983	0.128842880151736	0.0312747053331833	-0.0163018123291005	4	0.11451008652745	0.146208967607669	0.0731044838038346	0.168298830815512	0.460840005031969	0.229097445214338	0.104633541190593	0.0876844023412898	-0.0502193554877351	4	0.0927990083146216	0.114306213958624	0.057153106979312	0.155567756104772	0.535847671489837	0.275341301285407	0.167804949567943	-0.0750754815612197	0.0185938665752644	4	0.0966661589668486	0.155537785271289	0.0777688926356444	0.260239542327504	0.577609498132192	0.428741768486728	0.29142323242057	0.275721923742575	0.141355849245542	4	0.284310693473854	0.117502876693128	0.0587514383465638	0.00288309586277459
E9PQY2	-0.11629600009849	-0.340780802968268	0.0862899550638817	0.580520506762811	4	0.0524334146899835	0.392899172190303	0.196449586095152	0.798478642225581	0.923369339333593	-0.17085900057655	-0.0259018634427571	0.314253279530671	0.659263237172962	4	0.194188913171081	0.370769249083181	0.18538462454159	0.335223580807328	0.62767058743973	-0.0764787298473609	-0.181139788938239	-0.0694479281575776	0.156362551001251	4	-0.0426759739854817	0.142182894323023	0.0710914471615117	0.570270962651174	0.838818877131081	-0.112110366321537	-0.00636952487572728	0.450744396443273	0.661173067341275	4	0.248359393146821	0.367967429867257	0.183983714933628	0.225747143444793	0.538804266709944	-0.131033034730546	-0.584151314283766	0.154415627520441	0.583783346555891	4	0.00575365626550507	0.490889389328862	0.245444694664431	0.982058055490459
E9PQY3	0.103051153530187	0.589437959788278	-0.0836350463784307	-0.177787119215283	4	0.107766736931188	0.341665065558693	0.170832532779347	0.551406691509502	0.792692292070766	0.117773719391206	-0.0429909338973191	0.119695066390948	-0.19033121210415	4	0.00103665994517127	0.148624190427403	0.0743120952137014	0.989322095661478	0.993132771770857	0.172246313352433	0.242316963318576	-0.0753890280053628	0.109624491174498	4	0.112199684960036	0.136299010223572	0.0681495051117861	0.150786509039102	0.526218955067051	0.0594329135191578	-0.0111651914773764	-0.0449258708815163	-0.00340660144324945	4	-1.61875707460971e-05	0.0435387584794981	0.0217693792397491	0.99943080479289	0.99991095529121	0.451657760361804	-0.0698214494975714	0.139879534362561	-0.323697187740418	4	0.0495046643715939	0.328335739557011	0.164167869778506	0.773173988102084
E9PRJ8	-0.190016419381781	-0.147527634377928	-0.0917812850800707	0.0830956157634624	4	-0.0865574307690794	0.120042454857303	0.0600212274286515	0.199362122911162	0.509013258074699	-0.083466822517315	0.0871608010438787	0.101198722773559	0.198262618880324	4	0.0757888300451117	0.117099923423836	0.0585499617119179	0.243099886740596	0.543387738987632	-0.0903242779649436	-0.147753620443692	-0.0674729859725198	0.16485401189489	4	-0.0351742181215663	0.137562293932775	0.0687811469663875	0.627344182959671	0.864779509843633	-0.161522560446616	0.0142294363041394	0.180472166210551	0.136265690091081	4	0.0423611830397891	0.153027967105547	0.0765139835527737	0.599833566170086	0.819384035486746	-0.0250909809628305	0.0257343731407978	-0.163901213814542	0.0140751852117228	4	-0.0372956591062131	0.0871582263522003	0.0435791131761001	0.424952100821633
E9PRK3	NA	NA	NA	NA	0	NA	NA	NA	NA	NA	NA	NA	NA	NA	0	NA	NA	NA	NA	NA	NA	NA	NA	NA	0	NA	NA	NA	NA	NA	NA	NA	NA	NA	0	NA	NA	NA	NA	NA	NA	NA	NA	NA	0	NA	NA	NA	NA
E9PRZ1	NA	NA	NA	NA	0	NA	NA	NA	NA	NA	NA	NA	NA	NA	0	NA	NA	NA	NA	NA	NA	NA	NA	NA	0	NA	NA	NA	NA	NA	NA	NA	NA	NA	0	NA	NA	NA	NA	NA	NA	NA	NA	NA	0	NA	NA	NA	NA
E9PS76	-0.109656802735455	-0.217278742820347	-0.0231825294683002	NA	3	-0.116706025008034	0.0972399283236417	0.0561414987936344	0.0555256917757336	0.279096232873072	0.226654448190607	-0.167200061384933	0.12580819011756	NA	3	0.0617541923077449	0.204591127996334	0.118120742822492	0.559460778574516	0.779210618842883	0.258890294468658	-0.173920282425159	0.00751405365730662	NA	3	0.0308280219002688	0.21734512808944	0.125484268209492	0.780834955925834	0.930914635365061	0.0355142866129383	-0.0159768525497681	-0.0153934541233759	NA	3	0.00138132664659811	0.0295614496511727	0.0170673109137401	0.926694865491856	0.970963230647068	0.38791120872725	-0.190560090768101	-0.254608127990719	NA	3	-0.0190856700105233	0.353921435130362	0.204336635844493	0.915453552672064
E9PSI1	0.0973238929681455	0.00957332670680089	0.0717757980305741	0.0686685451281826	4	0.0618353907084258	0.0371315715773093	0.0185657857886547	0.015794731418423	0.14874602204951	-0.00213574434399111	-0.00643199924453228	0.0887347572075031	0.0267669095627853	4	0.0267334807954412	0.0438844718954989	0.0219422359477494	0.268817045159363	0.57348901024471	-0.00130738118678661	0.139822969652893	0.136475841141439	-0.0306967972229165	4	0.0610736580961573	0.0898149093230894	0.0449074546615447	0.222712801445159	0.605450358604959	0.0442579196849145	0	0.069741071290561	-0.100386570090407	4	0.00340310522126707	0.074952694933804	0.037476347466902	0.930601806014503	0.970963230647068	0.0264076019860983	0.153787101929341	0.117797036284287	0.0262793247988489	4	0.0810677662496438	0.0648759018765807	0.0324379509382903	0.0465808741981614
F1T0I1	NA	0.544046056974264	-0.0451608985637949	-0.122941229547043	3	0.125314642954475	0.364711451406759	0.210566254646231	0.50868565606144	0.768110258877989	NA	-0.238093916310984	-0.132354298749043	-0.0968365239499591	3	-0.155761579669996	0.0734801900122982	0.0424238074837052	0.00709881036961655	0.0967385160211468	NA	-0.154843045230012	0.0554240386186918	-0.227780940331809	3	-0.109066648981043	0.14704718244749	0.0848977303696343	0.185257959695673	0.572781127232903	NA	-0.00796630981005678	-0.196538994046887	-0.200443448502803	3	-0.134982917453249	0.110016931215327	0.0635183048525857	0.0518948514959656	0.271415460332706	NA	0.267355472458739	0.150795311841744	-0.0595568446804548	3	0.119531313206676	0.165683414928349	0.0956573642091387	0.195521151135511
F2Z2U4	-0.269186632815389	NA	0.959577020442868	0.329889380590045	3	0.340093256072508	0.614445374462442	0.354750202348211	0.303722078113795	0.617867996055183	-0.690073002582833	NA	0.369394833723132	0.341605579663828	3	0.00697580360137567	0.603821860578446	0.348616713747546	0.981844375407695	0.992348895639406	-0.264603405489135	NA	0.420207612467851	-0.0640440544113535	3	0.0305200508557877	0.352062934832044	0.20326363019697	0.864619699220063	0.964965491807101	0.262285148459961	NA	0.122266383082575	0.397493015920116	3	0.260681515820884	0.137620324022302	0.0794551311202396	0.0111664723930343	0.134899764261474	-0.34228115684353	NA	0.488585281103622	1.73537350825048	3	0.627225877503524	1.04574286422347	0.603759924162553	0.269422343592498
F2Z357	0.187417359189099	0.240121196786792	0.0906158804666717	NA	3	0.172718145480854	0.0758288208053198	0.0437797901042833	0.00526434893154385	0.0761441474643879	0.099962443274745	0.209869587694891	0.0949802000384015	NA	3	0.134937410336012	0.0649409661902509	0.0374936843113758	0.00770409115880021	0.100820205943953	0.0488224785846735	0.281359064046874	0.0390192435825293	NA	3	0.123066928738026	0.137172613628242	0.07919664540371	0.122392425698567	0.483018672175939	0.349527545819446	0.287193678758273	0.174454659922826	NA	3	0.270391961500182	0.0887375462876809	0.0512326462364194	0.00147384786552382	0.0447603030315752	-0.0405404613249394	0.324198268512189	0.0572025115533331	NA	3	0.113620106246861	0.188800937508406	0.109004272093732	0.268016058284552
F5GWT4	-0.0172927845867956	0.0528104205473974	0.0585870262740339	0.079502351039454	4	0.0434017533185224	0.0420562941032838	0.0210281470516419	0.0845887759044004	0.341551697285536	-0.0845979045359642	0.00895689376889422	0.0377733426319251	0.11921315832738	4	0.0203363725480589	0.0841058098195115	0.0420529049097557	0.645818434582614	0.828270622765444	0.00781950445929924	0.118420492920669	0.0536104682467607	0.111382803446857	4	0.0728083172683964	0.0521554239718791	0.0260777119859396	0.0314953841488688	0.285061515814462	0.0267173383757794	0.00634152687382669	0.0319677286586358	0.069741071290561	4	0.0336919162997007	0.0264524916125777	0.0132262458062888	0.04364604977747	0.251797726101702	0.140407954966443	0.174066281782411	0.00802614053891776	0.166778446125448	4	0.122319705853305	0.0775553383832594	0.0387776691916297	0.0197048004564706
F5GXX5	-0.0185359514374278	-0.0488433595185211	-0.0263018713124791	-0.114685441404843	4	-0.0520916559183178	0.0436639886109766	0.0218319943054883	0.0543199723132538	0.276810309611633	-0.0193364850975993	-0.0549415363941109	0.0714190605802158	-0.0309485882935019	4	-0.00845188730124908	0.0552727534233165	0.0276363767116583	0.770071258699614	0.899038851017233	-0.0668653051409545	-0.0564133089052664	0.020570206482753	-0.106331235059768	4	-0.0522599106558089	0.0530989715854589	0.0265494857927294	0.096564641128082	0.45005357906965	-0.0832555036493523	-0.0451887737662554	0.0202723950262611	-0.064362350345926	4	-0.0431335581838182	0.0450369142599354	0.0225184571299677	0.103915957312028	0.381698589251834	0.0557632715220088	-0.036151425607935	-0.0325586746912815	-0.104469266556029	4	-0.0293540238333092	0.0656854324689647	0.0328427162344823	0.405862665411834
F5GY05	0.0788423586779946	-0.00192231213102856	NA	-0.0172092900322231	3	0.0199035855049143	0.0516115990906963	0.0297979706283205	0.46088526962771	0.742118765610475	0.146979069776232	0.0279650085359785	NA	0.191969500762695	3	0.122304526358302	0.0847407410122088	0.0489250896347271	0.030522011467797	0.205955447917746	0.102146887007452	-0.0322764030237561	NA	0.0667690122127011	3	0.0455464987321324	0.069679276219894	0.0402293488824941	0.233953395205013	0.616814453288502	-0.18687813472351	0.0606721281774699	NA	0.0534392589614605	3	-0.0242555825281932	0.140881686038899	0.0813380793584465	0.73606895139755	0.889343101548678	-0.168482139797135	0.0368504053349717	NA	0.00176692617418783	3	-0.0432882694293252	0.10983096790414	0.0634109388848125	0.451640583279893
F5GYQ1	-0.00615222698159534	-0.120127197126013	-0.111522004129672	-0.167076639133282	4	-0.101219516842641	0.0679180677383325	0.0339590338691663	0.0246163802936539	0.182449852505841	-0.0236689058936324	-0.0941365991952094	-0.0839311502800862	-0.114276971892398	4	-0.0790034068153315	0.0389847301421142	0.0194923650710571	0.00670300892851286	0.0945396290482228	0.00651919338354073	-0.080960916517603	-0.0576386258679443	-0.0920973418870598	4	-0.0560444227222666	0.0441111935426095	0.0220555967713048	0.0440184025939416	0.330192632857284	0.0701752940595554	-0.0111651914773764	-0.0572642054447594	-0.0768687633842705	4	-0.0187807165617127	0.0653869715571141	0.0326934857785571	0.586540419276768	0.813839564906703	-0.050626073069968	-0.0783631857633739	-0.0305020883973441	-0.125530882083859	4	-0.0712555573286362	0.0411612686472919	0.0205806343236459	0.0134301059539414
F5GZS6	0.0506684112613663	-0.087102692704873	0.142929026175675	0.193595157029013	4	0.0750224754402953	0.123218601193227	0.0616093005966135	0.269044427293249	0.582523987322708	0.0523911977284386	0.0417468288865637	0.163439302197357	0.153623189113212	4	0.102800129481393	0.0646236761876341	0.032311838093817	0.019039721131932	0.165393899373076	0.0399521254001081	-0.0787119760140408	0.00188218557797637	0.0169841796308787	4	-0.00497337135126939	0.0515907445895556	0.0257953722947778	0.853475408690619	0.961970309214409	0.0486099442246216	0.0803421083176034	0.192432400851882	0.175961391172981	4	0.124336461141772	0.0706451197902847	0.0353225598951424	0.012518098941131	0.1374431749645	0.0489096004809463	-0.170330765765305	0.134390516805582	0.138146292769651	4	0.0377789110727187	0.144730719511914	0.072365359755957	0.620334641981941
F5H345	0.239307030871241	0.0565096406277076	-0.101617880283804	-0.0404790693550703	4	0.0384299304650186	0.148905456509965	0.0744527282549823	0.624202226883015	0.839023268949469	0.247478145727481	0.0955941154847079	0.142486931264191	-0.151802983167888	4	0.0834390523271229	0.169196175089528	0.0845980875447641	0.362073939026564	0.646047642197736	0.0639030518673132	-0.268150351056115	0.143313271194993	-0.0443347992358782	4	-0.0263172068074217	0.178626330120348	0.089313165060174	0.778181265608173	0.930417065666236	0.171422349828815	0.093804368124166	0.011860155210061	0.0534392589614605	4	0.0826315330311255	0.0679936717047191	0.0339968358523595	0.0511231183098632	0.269264127755417	-0.0617095721989843	0.169744675832317	-0.117322847194213	-0.00354035770524858	4	-0.00320702531653218	0.124307911836314	0.0621539559181569	0.960523875506618
F5H365	NA	0.133831429668947	-0.0983315575851326	-0.190745545026914	3	-0.0517485576477001	0.167227494862709	0.096548839174892	0.549970311184547	0.792429168266728	NA	0.157895312581113	-0.121452269231363	-0.0701191855741797	3	-0.0112253807414767	0.148694747896063	0.0858489527248757	0.881922646208212	0.952501664697186	NA	0.249494565391624	-0.0853455550377862	0.06495544184077	3	0.0763681507315358	0.167711550006147	0.0968283085422585	0.389130984321401	0.729582625492513	NA	0.0438162322924896	0.050156674972159	-0.0484403550577532	3	0.0151775174022985	0.0551858276698021	0.0318615524606125	0.593737667551104	0.81579625052509	NA	0.11235301194398	-0.16615718775491	-0.0522055164640091	3	-0.0353365640916463	0.140019298668736	0.0808401797781375	0.623668064528057
F5H442	-0.00738582692070575	0.0839555230293771	0.0228158952522118	0.09737984176971	4	0.0491913582826483	0.0497571436309235	0.0248785718154618	0.095385740493575	0.363162586287251	-0.0236689058936324	-0.0873024081069004	-0.00333186069774802	0.14387521256165	4	0.00739300946584219	0.0977658415074617	0.0488829207537308	0.884743923918612	0.95310370322197	0.0563824698975185	0.0726168033075441	0.0131240219998903	0.072196084597029	4	0.0535798449504955	0.0280089180992385	0.0140044590496193	0.00870050064693261	0.158557967474081	0.0464355729902847	-0.0817146497913695	0.0101718050572912	0.0648698397378648	4	0.00994064199851779	0.0651916219101586	0.0325958109550793	0.770693415764254	0.896963889463286	-0.0387142648268055	0.0987781544781735	0.0160078762003921	0.115477217419936	4	0.047887245817924	0.0722827888656469	0.0361413944328235	0.233395225591121
F5H538	0.136945313241563	NA	0.0526864248343496	0.198572833183398	3	0.129401523753104	0.0732351869331334	0.0422823548899971	0.0146270419512877	0.143098860254831	0.144084996507053	NA	0.099646603160818	0.122525892368216	3	0.122085830678696	0.0222224647939108	0.0128301460308214	9.19526108729798e-05	0.0106912593334238	0.0143035380294979	NA	0.0608511110030198	0.289679178051705	3	0.121611275694741	0.147400081375262	0.0851014766605803	0.14833913244118	0.52447859341484	-0.0249332921397541	NA	-0.064362350345926	0.069741071290561	3	-0.00651819039837306	0.0689221945585195	0.039792247581501	0.852486520777472	0.936351714896048	-0.0241873197739437	NA	0.395284651973192	0.0158249671616826	3	0.128974099786977	0.231497793576418	0.133655313438149	0.300897100069119
F5H5D3	-0.215451466758052	0.125050544126737	-0.0723070405769179	-0.0821267667135617	4	-0.0612086824804487	0.14029026551931	0.0701451327596548	0.416430211052287	0.711785720452326	0.00532556913666971	-0.0206841541717378	0.134929580086108	0.0267669095627853	4	0.0365844761534564	0.0683738726134827	0.0341869363067413	0.325708959024153	0.62003663925064	0.0538668719787356	-0.0697511084424191	0.0445082611395082	0.0319151800767623	4	0.0151348011881468	0.0573008790703235	0.0286504395351617	0.616279976768149	0.857515866914626	-0.246944703295488	-0.173703514288936	0.123828586852858	0.126947928697037	4	-0.0424679255086319	0.196120536147578	0.0980602680737889	0.680092155641883	0.860007943843611	-0.340030462095494	0.0289191316987525	-0.21203370948764	-0.148863385914483	4	-0.168002106449716	0.15348919817578	0.0767445990878898	0.0711623703962724
F5H5I6	-0.087309371217655	0.0491016908934383	-0.21627281495655	0.00189953291548151	4	-0.0631452405913212	0.116707833824756	0.058353916912378	0.320765257604185	0.630831051133974	-0.0215010692109222	-0.0103050083917385	-0.0945522660366587	-0.0550713824936759	4	-0.0453574315332488	0.0379134583686984	0.0189567291843492	0.0538290385332939	0.265770128814084	-0.0131274339856125	0.00848646588782864	0	0.0990293759352991	4	0.0235971019593788	0.0510681702593746	0.0255340851296873	0.391064450261735	0.729745576013102	0.147276262497112	0.0560945620709261	-0.0876755183408533	-0.0188366420128555	4	0.0242146660535823	0.100884939046683	0.0504424695233416	0.648194381734971	0.838617578867917	-0.0738135706144415	0.176940177236521	0.168806719826063	-0.0931094043914814	4	0.0447059805141652	0.148241740182474	0.0741208700912369	0.568492133149438
F5H5P2	NA	NA	NA	NA	0	NA	NA	NA	NA	NA	NA	NA	NA	NA	0	NA	NA	NA	NA	NA	NA	NA	NA	NA	0	NA	NA	NA	NA	NA	NA	NA	NA	NA	0	NA	NA	NA	NA	NA	NA	NA	NA	NA	0	NA	NA	NA	NA
F5H5V4	NA	-0.0057746376266351	-0.0185161263458837	0.159964379147733	3	0.045224538391738	0.0995716308806327	0.0574877078925834	0.390251406740465	0.689900586302004	NA	0.00512503217786717	0.099646603160818	0.209209950851526	3	0.10466052873007	0.102134803542764	0.0589675563190444	0.0873514595927022	0.338542900447101	NA	0.0294867645003806	0.08057751584703	-0.0345802317101446	3	0.0251613495457553	0.0577005945940574	0.0333134538212805	0.40804446136141	0.750470676323256	NA	0.00158799690319211	-0.0102440314968031	0.0713611669587229	3	0.0209017107883706	0.0440978090359413	0.0254598819175734	0.371536125497283	0.667134415582221	NA	0.0758656288294169	-0.00604904467280504	0.0435366482836487	3	0.0377844108134202	0.0412591760785323	0.0238209964154828	0.116482212210629
F5H8H2	-0.0235193589516834	NA	-0.156951724021352	0.378950199040931	3	0.0661597053559654	0.2789793338525	0.161068793498084	0.644252562243232	0.848927625485037	0.0657069014370603	NA	0.352551323559717	0.552786609043652	3	0.32368161134681	0.244819843156091	0.141346802349131	0.0409353287538452	0.236719310968333	0.369233809665719	NA	0.0644578504837531	0.387246433231338	3	0.273646031126937	0.181386010603169	0.104723262048972	0.0261580900804638	0.259265266600794	0.335348610649684	NA	0.239305804272794	-0.0768687633842705	3	0.165928550512736	0.215682537287765	0.124524370962593	0.172119244541934	0.476044351555597	0.166762928853958	NA	0.577565772586605	0.338801913451759	3	0.36104353829744	0.206302596957817	0.119108859888114	0.0151718851902005
F6QDS0	-0.0310268956206247	-0.0057746376266351	0.0273360922895941	0.0170064253056899	4	0.00188524608700604	0.0259376079832677	0.0129688039916339	0.889181038875371	0.960340936234457	0.0106315517298868	-0.0337639812157275	-0.108836492042906	-0.0569437968264465	4	-0.0472281795887984	0.0497293023205009	0.0248646511602504	0.106256638997697	0.370062004251197	-0.00786211777297044	0.00636952487572728	-0.0576386258679443	-0.0133495536590197	4	-0.0181201931060518	0.0276251088990677	0.0138125544495338	0.237521670247085	0.619036593917292	0.0311225174957805	-0.040278859642449	-0.00853163362111692	-0.0768687633842705	4	-0.023639184788014	0.0459613930601025	0.0229806965300513	0.343312545732187	0.640738228499191	0.0668315084782087	0.0289191316987525	-0.112964248589317	-0.0781007380466481	4	-0.0238285866147509	0.0854248349646948	0.0427124174823474	0.597108017407485
F6RWC2	0.250703603923074	0.213859811084593	NA	0.269671857755938	3	0.244745090921202	0.0283791128526991	0.0163846884448686	1.01200267374041e-05	0.00218520291622661	0.175604910514667	-0.142904474145231	NA	0.378095920890707	3	0.136932119086714	0.262644325094839	0.151637771794633	0.329737520474737	0.624559225811486	0	-0.275858446191377	NA	0.351985328743542	3	0.0253756275173883	0.314690154413923	0.181686445362203	0.873963017050932	0.967079047604761	0.052948879948959	-0.661641560615227	NA	0.233529239834997	3	-0.125054480277091	0.473388411015201	0.273310926530876	0.607971758905969	0.821223694000332	-0.0700784357361407	-0.0478467592403097	NA	0.539462952574508	3	0.140512585866019	0.345679921578593	0.199578395776849	0.438451103648764
F6TLX2	0.143629626546776	0.0546612162353389	0.068855361727861	-0.0326806987946631	4	0.0586163764288283	0.0723023483991371	0.0361511741995686	0.156053601450763	0.459338587138991	0.0264334078527797	0.00384547995129486	0.0474667388357692	-0.0383281186590995	4	0.00985437699518606	0.036729705319461	0.0183648526597305	0.610853842548839	0.80586821242148	0.0676486923293208	0.00424947300135792	0.0698511092539716	-0.0561280123785105	4	0.0214053155515349	0.0599755080478294	0.0299877540239147	0.502158585180346	0.8019151627048	0.052948879948959	0.0189415636534602	-0.0188366420128555	-0.0697089718114043	4	-0.00416379255546013	0.0526218518647636	0.0263109259323818	0.879449098305764	0.947460664354357	0.0744446925880838	0.0415883243416349	0.106627728566176	-0.0321804057491497	4	0.0476200849366862	0.0594585626912627	0.0297292813456314	0.160321289683333
F6U1T9	-0.0310268956206247	-0.087102692704873	0.0423019426865444	0.0704798385750055	4	-0.00133695176598696	0.071412556246104	0.035706278123052	0.971346450274892	0.988780685197723	0.0148623320079062	0.0701448240282773	-0.0892319341033952	-0.0144813767047317	4	-0.00467653869298585	0.0663971724527991	0.0331985862263996	0.892586429905582	0.955146469948521	-0.0505327340189932	0.0440071822390924	0.112286375574368	-0.0210336998721968	4	0.0211817809805676	0.0724480608987472	0.0362240304493736	0.580027584791147	0.842702194149546	0.0420769743853886	0.0314325078366572	-0.0625845373780228	-0.109534952304593	4	-0.0246525018651424	0.0735803892004685	0.0367901946002343	0.527737340335784	0.776345205328967	0.0870447293677175	-0.0444955497406719	0.0120225282492131	-0.0339894279810237	4	0.00514556997380874	0.0598624915841371	0.0299312457920685	0.869157751180715
F6WIT2	0.0881127201555953	-0.0850635474312744	0.0258309330076435	0.079502351039454	4	0.0270956141928546	0.0796886237002179	0.0398443118501089	0.521840272028489	0.776722374368351	-0.00427465510032587	-0.0337639812157275	0.0554951125917036	0.0924338272117802	4	0.0274725758718576	0.0570468501561244	0.0285234250780622	0.372663401798481	0.653837181449105	0.024617755622432	0.0232187095679472	0.0298242153823952	0.00757321970480085	4	0.0213084750693938	0.00958775967275007	0.00479387983637503	0.00435273563588002	0.109652665227211	-0.0318087382306762	0.0205088588004206	-0.0309529283289121	0.108129900494871	4	0.0164692731839257	0.0658220338829422	0.0329110169414711	0.634602508326595	0.831557599770826	0.0220397662522908	0.071239130879892	0.23013268155324	0.0907870248429047	4	0.103549650882082	0.089207584267417	0.0446037921337085	0.0593234542357122
F8VQE1	-0.0210255034631256	-0.0588136482734494	-0.0578719503133489	-0.129164222837206	4	-0.0667188312217824	0.0451961147110317	0.0225980573555159	0.0255328552756888	0.185177458638474	-0.0269267809119911	0.00256479185930319	-0.0664012257225098	-0.0108473822369924	4	-0.0254026492530475	0.0298732868971461	0.0149366434485731	0.139905683620388	0.428940042174882	-0.107116262385361	-0.0431976894011025	0.0426809080885015	0.0466932354480415	4	-0.0152349520624801	0.0739671934745053	0.0369835967372527	0.694696942920465	0.897533740331898	-0.0976107966264224	-0.0256485873706103	-0.102211611498734	-0.0414199273799808	4	-0.0667227307189368	0.0389052283680766	0.0194526141840383	0.0139709490766225	0.144637599515856	0.103675403911838	0.0113153132278342	-0.0243498614157489	-0.0577154978562872	4	0.00823133946690912	0.0695931039107902	0.0347965519553951	0.820870148426473
F8VUC8	NA	NA	NA	NA	0	NA	NA	NA	NA	NA	NA	NA	NA	NA	0	NA	NA	NA	NA	NA	NA	NA	NA	NA	0	NA	NA	NA	NA	NA	NA	NA	NA	NA	0	NA	NA	NA	NA	NA	NA	NA	NA	NA	0	NA	NA	NA	NA
F8VV52	-0.112308816425053	-0.297640527695542	0.0833987816696592	-0.0268594600659424	4	-0.0883525056292196	0.160888450330086	0.0804442251650429	0.314177815074873	0.624020719429265	0.0789008277469152	-0.142904474145231	-0.010018755824991	-0.0910695807310728	4	-0.0412729957385949	0.0970003997306802	0.0485001998653401	0.427427454794012	0.693783921585083	0.158262083916732	-0.0542022815899131	0.0093864679900772	-0.147790842158135	4	-0.00858614296030979	0.128608094533508	0.064304047266754	0.898144775467878	0.978411407653836	-0.0226487389452003	-0.046829132147511	0.0101718050572912	0.0681191542665708	4	0.0022032720577877	0.0497667899928281	0.0248833949964141	0.932325860339562	0.971301769995226	0.249049214970266	-0.390898145693426	-0.117322847194213	0.182443041288741	4	-0.0191821841571579	0.294621316730562	0.147310658365281	0.900651630437465
F8VV59	NA	0.182040522711566	0.00153233688424644	-0.0463556356917396	3	0.0457390746346911	0.120444501909591	0.0695386655999127	0.467377170785929	0.743366044403359	NA	0.103978419104153	0.148504437551915	0.0460850867625645	3	0.0995226478062108	0.0513548564151698	0.0296497401754928	0.0102021174014547	0.118490584730386	NA	0.0378020327123842	0.312100948935606	0.0990293759352991	3	0.14964411919443	0.143983898532785	0.0831291425768752	0.0840769965905133	0.43278495096125	NA	0.0345384187044788	0.218985819893198	0.193920482511291	3	0.149148240369656	0.100043121708142	0.057759923248766	0.02727279315085	0.208780065147874	NA	0.00809141235354779	0.226697691737919	0.261265312980738	3	0.165351472357401	0.137283556786341	0.0792606984659033	0.0549283970649231
F8VVM2	-0.503216749956612	-0.0993984635036487	0.0906158804666717	-0.303513475188864	4	-0.203878202045613	0.256367922018561	0.128183961009281	0.162822906245592	0.465230288828379	-0.34018350459463	-0.0576107231700952	0.223105391472475	-0.244778996126526	4	-0.104866958104694	0.2481587323084	0.1240793661542	0.430427930659411	0.695678492635054	-0.341995548179305	-0.215316904256327	0.0644578504837531	-0.10225005824795	4	-0.148776165049957	0.17262176763645	0.0863108838182252	0.135525223809603	0.503953915906578	-0.389791548119733	-0.206328661783429	0.0762105666201186	0.0303027601635257	4	-0.122401720779879	0.217030374523555	0.108515187261778	0.302408333531238	0.609616387285732	-0.308883946963422	-0.0973349420594256	-0.2618276345038	-0.477668487549248	4	-0.286428752768974	0.156459319711435	0.0782296598557177	0.0105620368257512
F8VVT7	0.0776793638218754	0.00957332670680089	0.117716238149265	NA	3	0.0683229762259803	0.0546752120750035	0.0315667484095031	0.0490176159441461	0.264467277361922	0.118756816561028	0.0967948604902591	0.224530275579303	NA	3	0.146693984210197	0.0682967647051154	0.0394311554872789	0.00672379101732315	0.0945396290482228	0.134649526694782	0.114494789706869	-0.0734059417262609	NA	3	0.0585794582251299	0.114746079262036	0.0662486797503905	0.338939245522447	0.705234969593024	0.181365153076393	0.102709921346058	0.234975550774061	NA	3	0.173016875065504	0.0665268328669477	0.0384092848640655	0.00298070528378152	0.0639054756941243	0.154044873679423	0.0478814424592646	0.136222510754472	NA	3	0.112716275631053	0.0568513487031523	0.0328231414775583	0.00931400448666434
F8VWK8	0.0695120429504771	0.0803260996286861	0.124764102878517	0.20022824936146	4	0.118707623704785	0.0593735067281567	0.0296867533640783	0.0071297466555241	0.0920299794287133	0.194378045166851	0.0529257529795701	0.220251394417322	0.261232163199808	4	0.182196838940888	0.090469381789199	0.0452346908945995	0.00689738552177824	0.0956872643278584	0.0825347577534872	-0.169127271236259	0.0517946152180008	0.0758028240777623	4	0.0102512314532478	0.120311289899387	0.0601556449496933	0.870287440146234	0.964965491807101	-0.0666862234315218	0.146431298775376	0.204294297405186	0.253646827339815	4	0.134421550022214	0.141050154421441	0.0705250772107203	0.105288694981732	0.384405464891034	-0.0423689723946661	-0.0229004021100788	0.253951301071356	0.138146292769651	4	0.0817070548340655	0.140464762510968	0.0702323812554839	0.28884441598111
F8VXU5	-0.0110929682518658	0.0472437446728559	-0.0451608985637949	-0.0821267667135617	4	-0.0227842222140916	0.054963184034587	0.0274815920172935	0.438794106506569	0.730035544286934	-0.0269267809119911	0.0404993622797525	-0.0963300790045619	-0.00180224263398543	4	-0.0211399350676965	0.0573306045558571	0.0286653022779286	0.48865936501356	0.737736401912784	-0.00523664836614712	-0.0388192488905281	-0.0753890280053628	-0.00952277411850655	4	-0.0322419248451361	0.0324056500740395	0.0162028250370197	0.0937296414472468	0.446182533933346	-0.0203677976939618	-0.0683252725641902	-0.0484403550577532	-0.0102440314968031	4	-0.0368443642031771	0.0264862828596005	0.0132431414298002	0.031906448828846	0.219060194361485	-0.00712443443338151	0.0619413862978022	-0.0743183206898334	-0.0874628412503393	4	-0.026741052518938	0.0687995124327338	0.0343997562163669	0.466479993790674
F8VZJ2	-0.0550618274625417	-0.101457985681943	-0.0546836726823016	0.0151266920874671	4	-0.0490191984348298	0.0480732819520134	0.0240366409760067	0.0875227647368863	0.344506924218239	-0.0389356625469429	0.0178585220856556	0.0634790568244001	-0.00541349618636433	4	0.00924710504418712	0.0430184976435933	0.0215092488217967	0.682270388693215	0.846328840795892	-0.0104923738176424	-0.0279309327477919	0.0787953105050205	0.06495544184077	4	0.0263318614450891	0.0533687473656933	0.0266843736828467	0.361852287875833	0.717188068437398	0.0111924148702044	0.0283198959693214	0.106550595421023	0.0713611669587229	4	0.0543560183048179	0.0430287705642415	0.0215143852821207	0.0448915148176887	0.256784128567626	-0.162504113118432	-0.170330765765305	-0.0658691308540155	-0.119756244457224	4	-0.129615063548744	0.0479590041514111	0.0239795020757056	0.00165566911603153
F8VZX2	0.139176860540145	0.137328873905174	NA	-0.0152869779011945	3	0.0870729188480415	0.0886510863471873	0.0511827285665013	0.0976939915592914	0.368240569181718	0.28123732866789	-0.0777886051077257	NA	-0.268447902020158	3	-0.021666392819998	0.279107040834148	0.161142525158315	0.878617479304481	0.950290032177977	-0.00786211777297044	0	NA	-0.223341875165312	3	-0.0770679976460942	0.126737873807909	0.073172145559517	0.263654401538653	0.642340932545152	-0.119415166944771	-0.040278859642449	NA	-0.350709924174647	3	-0.170134650253956	0.161310913911649	0.0931328995701151	0.080762166454115	0.337927125656218	-0.00444864688261037	0.169744675832317	NA	-0.387023123109247	3	-0.0739090313865135	0.284808978520922	0.164434540416677	0.614149479064313
F8W0M9	0.0741847435240077	0.299079943901786	0.0378284661072364	0.0777023569932438	4	0.122198877631568	0.119290367547272	0.0596451837736361	0.0863897831313644	0.342618045054565	0.0493008108825689	0.328075952376338	0.143993662514345	-0.126022179565497	4	0.0988370615519387	0.189389463032457	0.0946947315162283	0.336820484214638	0.628838716812502	0.206625105478131	0.18357317244592	0.112286375574368	0.24872656914991	4	0.187802805662082	0.0571156865149495	0.0285578432574748	0.000593044599627133	0.0338259212202419	-0.326429487122303	0	0.0386084540356654	0.045218752156492	4	-0.0606505702325364	0.178304600477588	0.089152300238794	0.521683434326507	0.774201778089853	0.400753273272596	0.499729325590738	0.00602378762777001	0.0990641275291029	4	0.251392628505052	0.236212868410286	0.118106434205143	0.0773667134975427
F8W6I7	-0.232660756790275	-0.35545240440422	-0.25599909327216	-0.277937228482848	4	-0.280512370737376	0.0532707478611159	0.0266353739305579	4.30768896661577e-05	0.00520885749843179	0.0295731153833469	0.0404993622797525	-0.0439261929666908	-0.129958594124668	4	-0.0259530773570648	0.0788231463821453	0.0394115731910726	0.53464543055521	0.765624413343628	0.0143035380294979	-0.101360714959241	-0.123819702852422	-0.0780025120012732	4	-0.0722198479458596	0.0606395654142528	0.0303197827071264	0.0546235122959985	0.363180991194012	-0.0690416444296514	0.0878366448645277	0.0906617229176591	0.0599821048282324	4	0.042359707045192	0.0755469977890432	0.0377734988945216	0.304977137184531	0.611369950735304	0.0523405058812197	-0.132481504612497	-0.72760609397518	-0.658404871656561	4	-0.366537991090754	0.385485877380663	0.192742938690332	0.105920828582579
F8W6L0	-0.154050922093909	0.205554117212453	-0.0372729891334822	0.0668549747562515	4	0.0202712951853284	0.152969870056835	0.0764849350284177	0.799851609347122	0.923369339333593	-0.12708383706792	0.145184260831559	0.0522891222926124	-0.0420320874225182	4	0.00708936465843332	0.117655689131886	0.0588278445659428	0.90801311600057	0.96237432753661	0.0323053139948317	0.118420492920669	0.0572353320655147	0.0740005814437769	4	0.070490430106198	0.0362556331269983	0.0181278165634991	0.00809053593509341	0.151703502815218	-0.0808767808666211	-0.0240321221696921	0.0485125778815339	0.0745959105580238	4	0.00454989635081111	0.0706017243340098	0.0353008621670049	0.901657339014946	0.96009515175843	-0.0888515703883249	0.101805847175741	0.165222382477024	-0.0394301448285376	4	0.0346866286089757	0.118742796630922	0.0593713983154609	0.580350838516827
F8W726	-0.12832409697554	-0.162500141314088	0.0167668505794068	0.116792545006159	4	-0.0393162106760154	0.129887050870325	0.0649435254351623	0.567097109805126	0.801713074029433	-0.0800788874005475	0.101587871679159	0.119695066390948	0.158472588774608	4	0.0749191598610417	0.10602149488623	0.0530107474431151	0.207291796340873	0.506173748254005	-0.0903242779649436	0.0148187147115452	0.020570206482753	0.11839470080223	4	0.0158648360078962	0.085267688257146	0.042633844128573	0.722593739553544	0.912829450342818	0.00672586318831336	0.0205088588004206	0.112857469031855	0.109707478608206	4	0.0624499174071987	0.0566816283202527	0.0283408141601263	0.0697618575509643	0.31781371067962	0.00354906708107061	-0.0715257557098203	-0.0616630198838045	-0.0467164989070302	4	-0.0440890518548961	0.0333562134365447	0.0166781067182724	0.0383590060368298
F8W7Q4	-0.0550618274625417	-0.0688533202500154	0.359159048026485	NA	3	0.0784146334379759	0.24322956452765	0.140428654554914	0.534072546064346	0.783638771919112	0.00745030448520684	-0.106520323651042	-0.11603199344711	NA	3	-0.0717006708709817	0.0687115393544224	0.0396706257427093	0.0831601222624098	0.326909037190201	-0.307624556857864	-0.0586277299707084	0.127883230625387	NA	3	-0.0794563520677288	0.218499729664557	0.126150877739692	0.485472823039798	0.796209619955679	-0.309621199435749	0.0712969687145964	-0.104038964549741	NA	3	-0.114121065090298	0.190659117983474	0.110077093091215	0.270286092594331	0.587472680976291	-0.242220007038076	-0.0955998906886779	0.224977124997447	NA	3	-0.0376142575764356	0.238935221934994	0.137949314703052	0.75769781962865
F8W809	-0.0123308019107195	-0.0789633478948566	0.0467615908772442	0.043068721891886	4	-0.00036595925911148	0.0589584160477525	0.0294792080238762	0.990497681983692	0.995892419593928	-0.0280143761695966	-0.0737303885333722	-0.00500068105836646	-0.00360673948073331	4	-0.0275880463105172	0.0327342310599476	0.0163671155299738	0.14285496013964	0.430558867898435	0.00391505000338302	0.012711051749554	0.0093864679900772	0.0151068923902083	4	0.0102798655333056	0.00484836366194915	0.00242418183097457	0.00543646611467343	0.125453718050823	0.0486099442246216	0.0142294363041394	-0.0554951125917036	0.0219489728336448	4	0.00732331019267554	0.0443934866707559	0.0221967433353779	0.752669536423577	0.89263240824185	0.0454705165141752	-0.0715257557098203	-0.0161874914623886	-0.0339894279810237	4	-0.0190580396597643	0.0488125058892229	0.0244062529446115	0.464564974376817
F8W8I6	-0.0385737046739728	0.0266468400657424	0.0273360922895941	-0.177787119215283	4	-0.0405944728834798	0.0965433608343046	0.0482716804171523	0.432601683598912	0.724517944332139	-0.0160956861888317	0.00256479185930319	-0.0217959236013446	0.0634253801416335	4	0.0070246405526901	0.0390132802318188	0.0195066401159094	0.731097854853582	0.877723913908809	0.0233325038306238	0	0.0408512375314192	-0.124840762462525	4	-0.0151642552751204	0.0750080590400858	0.0375040295200429	0.699983744089043	0.900447173779224	0.0311225174957805	0.00317424779514364	-0.0625845373780228	0.045218752156492	4	0.00423274501734834	0.0478490065665735	0.0239245032832867	0.865391619248786	0.941374186753897	-0.0187772070306282	0.0400107462282998	0.0100257181852663	-0.345995854849192	4	-0.0786841493665636	0.179816859118207	0.0899084295591036	0.415142701306598
F8W914	0.0219332862428659	-0.203940943283194	0.186691852021719	0.0938220223565208	4	0.0246265543344779	0.166636858837275	0.0833184294186374	0.777519398498966	0.915280818404351	-0.178084533414073	0.024183367993552	0.00332418359256517	0.280637562372401	4	0.0325151451361113	0.188713618380525	0.0943568091902623	0.742154251089713	0.882733903975151	-0.00261594820701144	-0.164350130974387	0.0316679153660836	0.0300572338561799	4	-0.0263102324897838	0.0933723541746924	0.0466861770873462	0.593477781370659	0.843877390914159	0.11028205501491	0.0110794458804898	0.198375540217912	-0.0732844260352317	4	0.0616131537695202	0.118072894103157	0.0590364470515786	0.336862324659693	0.636459254653907	-0.150621863046689	-0.405870652629586	0.421061286906614	0.207157907641288	4	0.0179316697179064	0.368030233906538	0.184015116953269	0.925545327363065
F8W9P4	0.263034405833794	-0.0708696658485201	0.0920549778836438	0.0522637500920201	4	0.0841208669902344	0.137973361757384	0.0689866808786922	0.268456663978979	0.582523987322708	0.0646869685272143	0.00512503217786717	0.039393438300087	0.147131861892354	4	0.0640843252243806	0.0605064587715551	0.0302532293857775	0.0784714541421563	0.318394651792256	0.19867635236264	0.0645003541031721	0.198518773218447	0.152951922838599	4	0.153661850630714	0.0632158348588821	0.031607917429441	0.00281856138558658	0.081147724463126	0.250999340913446	0.062194761607344	0.103386789238852	0.204294297405186	4	0.155218797291207	0.0874115658282906	0.0437057829141453	0.0120509602354512	0.136552305547506	-0.0451160916776898	-0.0229004021100788	0.260685012436559	0.187109444411157	4	0.0949444907649869	0.152171706454127	0.0760858532270636	0.258573385530173
F8W9T3	NA	NA	NA	NA	0	NA	NA	NA	NA	NA	NA	NA	NA	NA	0	NA	NA	NA	NA	NA	NA	NA	NA	NA	0	NA	NA	NA	NA	NA	NA	NA	NA	NA	0	NA	NA	NA	NA	NA	NA	NA	NA	NA	0	NA	NA	NA	NA
F8WAN9	0.0327761392588232	0.0766875225653379	0.0393211667483045	-0.0307376748768701	4	0.0295117884238989	0.0445811156182347	0.0222905578091174	0.233719020430841	0.546851856627271	0.0358321058550292	0.0919858725678594	0.0934213721818396	-0.0163018123291005	4	0.0512343845689069	0.052404814597544	0.026202407298772	0.0983295245406679	0.355988206810107	0.0500852314363091	0.170397783698187	0.143313271194993	0.0226014289371326	4	0.0965994288166552	0.0713387571078448	0.0356693785539224	0.0351906711138544	0.300222797296505	-0.029513280243014	0.0982640163148658	0.050156674972159	-0.0326921630674488	4	0.0215538119941405	0.0639089272256684	0.0319544636128342	0.525105716949838	0.776345205328967	0.142823855683198	0.196898727336044	-0.0141540943098603	-0.0818382920564612	4	0.0609325491632302	0.130657956539332	0.0653289782696661	0.386967526275307
F8WCT1	0.499391316510014	-0.26958074449027	NA	-0.599289282220258	3	-0.123159570066838	0.563785539674644	0.325501733096374	0.670042532049826	0.861334185650327	0.426463267951931	0.145184260831559	NA	-0.614991296161769	3	-0.0144479224594262	0.538765930377004	0.311056654933363	0.957877595578165	0.986408501908743	0.23243830747353	-0.0279309327477919	NA	-0.166843584755951	3	0.0125545966565958	0.202696363889326	0.11702680025526	0.902969678570875	0.979983813724864	-0.0158167054627749	-0.230358731146505	NA	-0.744926879868889	3	-0.330367438826056	0.374702172150668	0.216334399957126	0.127544503777065	0.416248245895947	0.809384029341306	-0.042822859650815	NA	-0.417396772152766	3	0.116388132512575	0.628696181591592	0.362977909680395	0.717289518323314
F8WJN3	0.0303736490435187	0.0114803924714599	-0.138270302955276	-0.167076639133282	4	-0.065873225143395	0.101210195184354	0.0506050975921768	0.240756154782535	0.554307582564816	-0.0312820900035077	0	-0.0234862519035448	-0.19033121210415	4	-0.0612748885028005	0.0870587840492016	0.0435293920246008	0.208869533883524	0.506836986275574	0.0911478880581951	-0.0235985119517589	0.0279781562170223	-0.0541557700469054	4	0.0103429405691383	0.0636462783410967	0.0318231391705484	0.75620491230143	0.92525614619649	0.0355142866129383	-0.0240321221696921	0.050156674972159	-0.102211611498734	4	-0.0101431930208322	0.0692583943417797	0.0346291971708899	0.779458007615059	0.901726957723804	-0.101186427199445	0.0305088784611451	0.0120225282492131	-0.246160587269398	4	-0.0762039019396211	0.127385140343984	0.0636925701719922	0.276655737590379
G3V0E4	0.0399596978727167	-0.087102692704873	-0.0690867378092754	-0.0229916426262292	4	-0.0348053438169152	0.0566850999512318	0.0283425499756159	0.265422231784106	0.580024607760842	0.116789951851627	-0.0128928028808943	-0.0525290511409523	0.00359774510860439	4	0.0137414607345963	0.0726247231338027	0.0363123615669014	0.718143600970404	0.870272510750351	0.171086124274316	0.0806878455655607	-0.0596001422012304	0	4	0.0480434569096616	0.100167313837571	0.0500836569187855	0.374469087563599	0.723320526725183	0.151328779321585	-0.0208046151392962	0.0219489728336448	-0.0449258708815163	4	0.0268868165336043	0.0874484974746529	0.0437242487373265	0.561189993872383	0.800980808062424	0.172292015986229	0.043164179267174	-0.072201379677732	0.0690416444296514	4	0.0530741150013305	0.100432442143344	0.0502162210716718	0.331237320006618
G3V0I5	0.0938765913496768	0.187111512258988	0.0659290016152019	0.0263685285093811	4	0.093321408433312	0.0683859729406037	0.0341929864703018	0.0342197843983521	0.21952668471564	0.112848159670253	0.066472284817518	0.0871691628695006	0.0390901880129154	4	0.0763949488425467	0.0312784521646953	0.0156392260823476	0.00275274936995567	0.0664271015011069	0.0437603855284126	-0.0344540563291262	0.129605851774394	0.134047965113716	4	0.0682400365218491	0.080086987637208	0.040043493818604	0.139239961600756	0.511037804454889	0.0615877982228317	0.00317424779514364	0.195407030855993	0	4	0.0650422692184921	0.0914057862985946	0.0457028931492973	0.204544620874871	0.516609464010922	0.142823855683198	0.264656322857784	0.247186012984058	0.102361717629678	4	0.18925697728868	0.0790519985454308	0.0395259992727154	0.00303731720313308
G3V180	-0.00738582692070575	0.0472437446728559	-0.030993566637201	0.0522637500920201	4	0.0152820253017423	0.0410059402497573	0.0205029701248787	0.48422006145082	0.752897232969487	-0.0654890815882595	0.0725879999566061	0.00829614155509137	0.0513090938255769	4	0.0166760384372537	0.0609560650169034	0.0304780325084517	0.604014954562006	0.802609761600415	0.00391505000338302	0.0522394159361912	0.0224257630612349	0.0207314415840865	4	0.0248279176462239	0.0200938608727949	0.0100469304363974	0.0483793054355721	0.340124139881516	-0.0226487389452003	0.00317424779514364	-0.0102440314968031	0.0303027601635257	4	0.000146059379166501	0.0227020802742795	0.0113510401371398	0.990150697950436	0.997178086257264	0.0625845373780228	0.00970426332184882	-0.0512010810651801	0.0707260521410043	4	0.022953442943924	0.0563538819343626	0.0281769409671813	0.446410861743029
G3V1J0	0.455295737254207	0.34366330639567	0.121949087271463	0.0614005446641434	4	0.245577168896371	0.185119510734215	0.0925597553671076	0.0378676629834777	0.228490908580944	0.288244968631074	-0.0298275666565573	-0.0387889945146499	-0.0815089424229785	4	0.034529866259222	0.170639867175123	0.0853199335875615	0.699723380357193	0.855044649534714	0.184947192059965	-0.0431976894011025	0.020570206482753	-0.00189953291548151	4	0.0401050440565335	0.100107588132958	0.050053794066479	0.453545617838568	0.774706141875992	0.0808382771224287	-0.119189355210032	0.0419173890662409	0.0485125778815339	4	0.0130197222150428	0.0897652763157351	0.0448826381578676	0.781516582612096	0.901726957723804	0.0878808319937787	0.217980861485165	0.428555823453538	0.0123232784501301	4	0.186685198845653	0.182250011194576	0.0911250055972879	0.0864007955524821
G3V1V0	-0.0235193589516834	-0.19072532377903	0.0303417080452137	0.0759001143592584	4	-0.0270007150815604	0.116468309743182	0.0582341548715909	0.659236483173434	0.856691761370782	0.0431001063190685	-0.0337639812157275	-0.00333186069774802	0.0355799793690945	4	0.0103960609436719	0.035788030994022	0.017894015497011	0.58240373114829	0.792352150882664	-0.00261594820701144	-0.060845555220527	0.00751405365730662	-0.0482551686072211	4	-0.0260506545943632	0.0335633761492738	0.0167816880746369	0.171571165583824	0.559056066260777	0.0267173383757794	0.0173725639981195	0.035291912251201	0.0202723950262611	4	0.0249135524128403	0.00794503712792974	0.00397251856396487	0.000763726915383281	0.0299837203273202	-0.0580056034355656	-0.254942993480246	-0.00402987703615298	-0.0303736490435186	4	-0.0868380307488708	0.114216175273573	0.0571080876367867	0.17917746289049
G3V2I9	NA	NA	NA	NA	0	NA	NA	NA	NA	NA	NA	NA	NA	NA	0	NA	NA	NA	NA	NA	NA	NA	NA	NA	0	NA	NA	NA	NA	NA	NA	NA	NA	NA	0	NA	NA	NA	NA	NA	NA	NA	NA	NA	0	NA	NA	NA	NA
G3V2S6	0.103051153530187	-0.365317024313775	-0.048328177642478	0.129011450818821	4	-0.0453956494018115	0.227165560590762	0.113582780295381	0.703238503882007	0.877924517549767	-0.113167056732735	-0.212585383146436	-0.00667143404288001	0.0991754050908354	4	-0.058312117207804	0.13450946039983	0.067254730199915	0.419242251039207	0.686921043301639	0.0271848293262302	-0.124370693005741	-0.0132445065094908	0.213142600589466	4	0.025678057600116	0.140445504015479	0.0702227520077394	0.727160081280811	0.915918719046621	0.204951973394009	-0.112302969624792	-0.0912958340195502	0.178970141045319	4	0.0450808276987464	0.170150310976047	0.0850751554880233	0.615211782465329	0.821834282804593	-0.0869632258243717	-0.340712388525209	0.0802247294691871	0.217838935049614	4	-0.032402987457695	0.240372994044363	0.120186497022181	0.796495840519836
G3V2U7	NA	NA	NA	NA	0	NA	NA	NA	NA	NA	NA	NA	NA	NA	0	NA	NA	NA	NA	NA	NA	NA	NA	NA	0	NA	NA	NA	NA	NA	NA	NA	NA	NA	0	NA	NA	NA	NA	NA	NA	NA	NA	NA	0	NA	NA	NA	NA
G3V325	0.256882178852198	-0.00384718905552073	0.134573626136523	-0.0114500207435382	4	0.0940396487974156	0.127633063007823	0.0638165315039115	0.191023991877119	0.500762753792383	0.226654448190607	-0.0873024081069004	0.0377733426319251	-0.00360673948073331	4	0.0433796608087247	0.132798849695825	0.0663994248479127	0.537769302714467	0.768301242105335	0.0788276164223272	-0.283607945796312	-0.0459252053041538	-0.0443347992358782	4	-0.0737600834785042	0.151613279185477	0.0758066395927385	0.368129088751528	0.720760515087999	-0.0526338879080386	-0.0451887737662554	0.0269670476002694	-0.0572642054447594	4	-0.032029954879696	0.0396446308845941	0.0198223154422971	0.157253312630994	0.458153265143718	-0.13883667804861	-0.134261511057783	-0.0141540943098603	-0.054039839712889	4	-0.0853230307822856	0.0613795320323215	0.0306897660161607	0.0319894624370384
G3V3E8	-0.191417774558394	-0.206155364348636	0.113470933347159	0.0759001143592584	4	-0.0520505228001532	0.17023537729269	0.0851176886463451	0.563297109350883	0.80139461802098	-0.0610294333975597	0.0165902186713217	0.0682483009722722	0.0249978167097296	4	0.0122017257389409	0.0538114612271747	0.0269057306135874	0.666129250230735	0.837875987822392	-0.104303990459974	-0.105933444749065	-0.0170510919392254	0.0300572338561799	4	-0.0493078233230212	0.0672565942795836	0.0336282971397918	0.19293715443008	0.580925316575829	-0.184322429819753	-0.0353855987358967	0.0185938665752644	0.0874628412503395	4	-0.0284128301825115	0.115460272432318	0.0577301362161592	0.640089400101365	0.83374909747936	-0.0775584008569662	-0.231890118844038	-0.141533400786088	0.17463200411984	4	-0.069087479091813	0.174378949506463	0.0871894747532314	0.458312676532651
G3V3G9	NA	NA	NA	NA	0	NA	NA	NA	NA	NA	NA	NA	NA	NA	0	NA	NA	NA	NA	NA	NA	NA	NA	NA	0	NA	NA	NA	NA	NA	NA	NA	NA	NA	0	NA	NA	NA	NA	NA	NA	NA	NA	NA	0	NA	NA	NA	NA
G3V3H3	0.0207234790097994	-0.0891447242430916	0.0644635926107032	0.11152402408998	4	0.0268915928668476	0.0857841789929478	0.0428920894964739	0.553777960916112	0.794578968813155	-0.00427465510032587	0.0216567560677554	0.00498340751425566	0.0547812857323819	4	0.0192866985535168	0.0259820733851509	0.0129910366925755	0.188181885815345	0.484147949633861	-0.0410900960216473	0.0419417630733082	-0.0343061220373204	0.0244689955938996	4	-0.00224636484793999	0.0416451862574747	0.0208225931287373	0.917607102752844	0.98376271074499	0.00672586318831336	0.0484328603628594	-0.0484403550577532	0.0713611669587229	4	0.0195198838630356	0.0526173605136887	0.0263086802568444	0.486131975176139	0.748638288821941	-0.0451160916776898	-0.0114047632722494	0.170595554575876	0.123614266858274	4	0.0594222416210528	0.103962893009064	0.0519814465045318	0.296531566031191
G3V4E1	NA	0.269104884456296	0.134573626136523	0.300866479359533	3	0.234848329984117	0.0882805862094912	0.0509688202122677	0.0026994545756275	0.0499444970615628	NA	0.374358841843586	0.307546177534687	0.047828525090615	3	0.243244514822963	0.172500840027863	0.099593406425523	0.0330445425311986	0.212088433273489	NA	0.102653177062352	0.400366699978057	0.0263341478134625	3	0.176451341617957	0.197635306406832	0.114104797355358	0.123819336838191	0.484224909782471	NA	0.210998466671263	0.416737788268683	0.186464677592244	3	0.271400310844063	0.126462300547465	0.0730130432634182	0.00674702503697308	0.103011397407927	NA	0.653109036545666	0.376808048856889	0.0520885111484542	3	0.36066853218367	0.300835139214187	0.173687248607009	0.0557084498815864
G3V4K3	-0.110982200202023	0.0266468400657424	0.131777704639572	-0.00762324120302504	4	0.00995477582506657	0.100090275662816	0.0500451378314079	0.848897825598406	0.941731422673021	-0.0925404061427771	-0.0589471707329094	-0.00166496849511011	-0.135883428081773	4	-0.0722589933631424	0.0566278063805241	0.0283139031902621	0.0433696163508914	0.243210774875072	-0.0751014552407188	0.0847064973029538	0.0770109008268377	0.00189703517259759	4	0.0221282445154176	0.0748132341944028	0.0374066170972014	0.575739780909939	0.841615743564191	-0.0203677976939618	0.110089451711655	-0.0257477691976516	-0.214192858610762	4	-0.0375547434476799	0.133459891400496	0.0667299457002478	0.593968755344269	0.81579625052509	-0.328829357374922	-0.201715004904923	-0.010095877735507	0.00176692617418783	4	-0.134718328460291	0.159506140068037	0.0797530700340187	0.142144141848823
G3V4X8	0.196017653157955	0.254685824543332	0.0137327904897734	-0.096280861023422	4	0.0920388517919097	0.16213346595755	0.0810667329787752	0.299538812843213	0.614318745742898	0.329590700902036	0.200964034472999	-0.0910031989555881	0.0107664308690703	4	0.112579491822129	0.188606736898812	0.0943033684494061	0.277609822648822	0.581112720716934	0.497880755919615	0.283108845996834	0.0149891742194532	0.1323170770346	4	0.232073963292626	0.20843468382375	0.104217341911875	0.0675602344630914	0.401246736310266	0.173416399960902	0.330798448071928	-0.28705128695233	0.00170028898983932	4	0.0547159625175849	0.264529045115358	0.132264522557679	0.693484001755985	0.867373467688113	0.620644188743036	-0.0630242871438074	-0.336082189197223	0	4	0.0553844281005014	0.404084466492673	0.202042233246337	0.793183168692711
G3V599	NA	0.0133849406568199	-0.106561443227938	0.165059246270496	3	0.0239609145664593	0.136118838369288	0.0785882479742875	0.730452160803109	0.892361593667389	NA	0.0492090612522922	0.079315604875109	-0.0126632352657523	3	0.038620476953883	0.0468947262119944	0.0270746828020688	0.14892825497877	0.438393175592461	NA	0.00848646588782864	0.0390192435825293	0.0132271591719856	3	0.0202442895474479	0.0164314551232744	0.00948670503859971	0.0512302022904175	0.350382130144643	NA	0.0283198959693214	-0.00170229523100057	-0.169499741294535	3	-0.0476273801854047	0.106606694409183	0.0615494037145578	0.397472659861383	0.6853281274157	NA	-0.188709295080159	-0.0616630198838045	0.128474557948809	3	-0.0406325856717182	0.159634296214621	0.0921649038914077	0.620769116346578
G3V5T0	NA	NA	NA	NA	0	NA	NA	NA	NA	NA	NA	NA	NA	NA	0	NA	NA	NA	NA	NA	NA	NA	NA	NA	0	NA	NA	NA	NA	NA	NA	NA	NA	NA	0	NA	NA	NA	NA	NA	NA	NA	NA	NA	0	NA	NA	NA	NA
G3V5V3	0.05303736916785	-0.149657073939275	0.0137327904897734	-0.0346263431096325	4	-0.029378314347821	0.0878358963530228	0.0439179481765114	0.528419685991209	0.781687086188938	0.0106315517298868	0.035498681221386	-0.0577154978562874	-0.0968365239499591	4	-0.0271054472137434	0.0609446641074914	0.0304723320537457	0.407975046901094	0.679883443650501	-0.0424352663203967	-0.0410068081282922	0.0093864679900772	-0.0900753443018482	4	-0.041032737690115	0.0406170790169016	0.0203085395084508	0.0898422566664423	0.441614864882366	0.0658879356564572	-0.140047960107697	-0.0379224831437538	0.0169133829363464	4	-0.0237922811646617	0.088345039237192	0.044172519618596	0.609534018750955	0.82160721952993	-0.0907423898475654	-0.0081370494383384	-0.0512010810651801	-0.123603433512744	4	-0.0684209884659571	0.0499133439625035	0.0249566719812518	0.0336646405066165
G5E9D5	0.482793370325443	0.165007325552124	0.138757374958017	0.0686685451281826	4	0.213806653990942	0.183877398419089	0.0919386992095443	0.0590001941301488	0.284465278542926	0.29782523048816	-0.187520045764529	0.0280143761695966	-0.22149214359061	4	-0.0207931456743455	0.239428340563694	0.119714170281847	0.867820996112131	0.944722369561793	0.0948235462015935	-0.119739244274096	0.163633255574588	0.06495544184077	4	0.0509182498357141	0.121041825585094	0.0605209127925469	0.432407471953877	0.768033696507613	0.774232851882896	0.0453567503682719	0.114429888850609	-0.0804620281082788	4	0.213389365748374	0.382501414163128	0.191250707081564	0.307208303899899	0.61229904512637	0.133945704336746	-0.0344883763852907	0.245489722323159	0.17306470897288	4	0.129502939811874	0.118692110653936	0.0593460553269682	0.0718464605545602
G5EA06	-0.129666763466949	-0.278873498300007	0.0393211667483045	NA	3	-0.123073031672884	0.159199777608296	0.0919140344570782	0.170404561945327	0.478473485057648	-0.136436836055582	0.529131783996347	-0.0698902118023897	NA	3	0.107601578712792	0.366569091406615	0.211638763600206	0.569939931762567	0.783944193748227	-0.107116262385361	0.564964427475837	-0.125873361620397	NA	3	0.11065826782336	0.393552438966607	0.227217606577604	0.585761692139879	0.842821560383407	-0.0364106401896849	0.0967789981282772	-0.202399645468129	NA	3	-0.0473437625098457	0.149888675585573	0.086538267197807	0.542056944734699	0.78554081684228	-0.260194454048832	0.149404227548142	-0.0637645425290922	NA	3	-0.0581849230099277	0.204856337727147	0.118273861731969	0.582089299508114
G5EA09	-0.181636753765808	-0.0830272802747558	-0.174147339283873	0.0722888608068795	4	-0.0916306281293894	0.118115376813333	0.0590576884066664	0.171754831983941	0.478665260978569	-0.167259759522482	-0.131611304613872	-0.0490817495224835	0.0685870852574124	4	-0.0698414321003564	0.104720686442022	0.0523603432210108	0.230646525543521	0.53023137369661	-0.124105997977031	-0.122053110112342	-0.00188464434494295	0.088355874420847	4	-0.0399219695033673	0.102850244295349	0.0514251221476743	0.467054200954875	0.783521004154598	0.0464355729902847	0.0329862990917379	-0.0153934541233759	0.0435690149373992	4	0.0268993582240115	0.0287823671004469	0.0143911835502235	0.110808483887898	0.391324821019994	-0.227583844861574	-0.218610780794021	-0.0637645425290922	0.0193181771997791	4	-0.122660247746227	0.120888437918261	0.0604442189591305	0.0887481735466769
G5EA36	NA	NA	NA	NA	0	NA	NA	NA	NA	NA	NA	NA	NA	NA	0	NA	NA	NA	NA	NA	NA	NA	NA	NA	0	NA	NA	NA	NA	NA	NA	NA	NA	NA	0	NA	NA	NA	NA	NA	NA	NA	NA	NA	0	NA	NA	NA	NA
G8JLA2	NA	NA	NA	NA	0	NA	NA	NA	NA	NA	NA	NA	NA	NA	0	NA	NA	NA	NA	NA	NA	NA	NA	NA	0	NA	NA	NA	NA	NA	NA	NA	NA	NA	0	NA	NA	NA	NA	NA	NA	NA	NA	NA	0	NA	NA	NA	NA
G8JLB3	0.797322109425439	0.116215886751975	-0.0388471246315927	0.161664668137572	4	0.259088884920848	0.368946717639209	0.184473358819605	0.209770235596135	0.520209534214205	0.325338723050014	0.010231922610956	0.039393438300087	0.0771490987608364	4	0.113028295680473	0.14416682567904	0.0720834128395202	0.167923045153014	0.46022789256352	0.196397212803503	0.172287364899405	-0.0596001422012304	0.068580305659524	4	0.0944161852903004	0.116694147806187	0.0583470739030933	0.156750725003625	0.536037829961491	-0.061986886895701	0.0863408489390465	-0.0502008129221906	0.165381076297364	4	0.0348835563546298	0.11000104293759	0.055000521468795	0.549325660298018	0.790153000196844	0.00177562488985128	0.0336831262562887	0.224977124997447	0.539462952574508	4	0.199974707179524	0.246855663471946	0.123427831735973	0.156321768356506
G8JLD5	0.00856927872517024	0.017186510816676	0.055639742223697	0.14972034765093	4	0.0577789698541183	0.0646197458927833	0.0323098729463917	0.123948388828409	0.415374308126066	-0.0204183711932113	-0.00643199924453228	0.0410117166984698	0.11921315832738	4	0.0333436261470267	0.0629942560949788	0.0314971280474894	0.330516772738694	0.625391939965235	-0.0104923738176424	0.0645003541031721	0.00188218557797637	0.0503642171765386	4	0.0265635957600112	0.0364599511030669	0.0182299755515334	0.195341424520939	0.584729803719175	0.0420769743853886	0.015801856122893	0.069741071290561	0.114429888850609	4	0.0605124476623629	0.0421551168468481	0.0210775584234241	0.0283920744416419	0.21088265611077	0.0342365361020928	0.0273276312164651	0.190127724239844	0.149348639999072	4	0.100260132889369	0.0819840038023523	0.0409920019011761	0.0500724199241574
H0Y2W2	0.0327761392588232	0.0133849406568199	0.109213099344002	0.0037965680880791	4	0.039792686836931	0.0478243844214167	0.0239121922107083	0.14714577191232	0.450680515188392	0.00851149985551747	-0.0377111657323905	0.036151425607935	0.00179999404621017	4	0.00218793844431803	0.0304718170566085	0.0152359085283042	0.890514777364331	0.954280812468051	0.0614005446641431	0.0604249416730548	0.082357522292316	0.0393231298110315	4	0.0608765346101364	0.0175732809776049	0.00878664048880245	0.000447785664010541	0.0281368132360454	0.0871984419018694	-0.00158974676239254	0.011860155210061	0.0152309395493007	4	0.0281749474747096	0.0400142878866738	0.0200071439433369	0.20870681279834	0.522692019305371	0.0668315084782087	0.0447383147652844	0.061065151185732	0.0639765893467946	4	0.059152890944005	0.00989386980511812	0.00494693490255906	2.07289884728329e-05
H0Y368	-0.108332621788073	-0.0891447242430916	-0.0578719503133489	-0.0191341669567153	4	-0.0686208658253073	0.0389988242369496	0.0194994121184748	0.0125318464270248	0.129726135981227	-0.085729874025884	-0.155715861114569	0.026381444426631	-0.0588186444468836	4	-0.0684707337901764	0.0752765760483503	0.0376382880241752	0.118755535591574	0.399114519534354	-0.0600375827858328	0.00212630110838796	-0.0266117302473197	-0.0561280123785105	4	-0.0351627560758188	0.028993636106897	0.0144968180534485	0.0514730091833587	0.351248096526622	-0.0135465318379479	-0.00477450532034729	0.111283333533745	-0.0240168811185356	4	0.0172363538142285	0.0631894710525365	0.0315947355262683	0.605051091236367	0.820070910891679	-0.069146161040766	-0.226184000498822	-0.0532874083136463	-0.0321804057491497	4	-0.095199493900596	0.0886260787646116	0.0443130393823058	0.0752785292442468
H0Y3U8	NA	-0.122216545848741	0.0761453976583385	0.043068721891886	3	-0.00100080876617201	0.106270681786147	0.0613554067361971	0.985199374120101	0.994079706929114	NA	-0.0536087926125991	-0.00333186069774802	0.196691911005098	3	0.0465837525649169	0.132405766088262	0.0764445046933166	0.49906720437746	0.745395335391828	NA	-0.0922585078519886	-0.109525367532913	0.0758028240777623	3	-0.0419936837690464	0.102379436687685	0.059108795331117	0.434560928071321	0.768033696507613	NA	-0.100330327958716	-0.00511292339365252	0.023623604525899	3	-0.0272732156088233	0.0648802994590536	0.0374586583577881	0.423975026626635	0.703606821694988	NA	-0.0613299886039318	0.112223191459695	-0.0213736507925668	3	0.00983985068773223	0.0908894305381264	0.0524750371876791	0.831531775926941
H0Y4R1	-0.00985619574501398	0.0247597305214769	-0.0787692912066147	-0.108524456778169	4	-0.0430975533020802	0.0612719386662083	0.0306359693331041	0.209124499585436	0.519033959151701	-0.0160956861888317	0.0178585220856556	-0.0508043706714913	-0.100693999619473	4	-0.0374338835985351	0.0506398426754771	0.0253199213377385	0.189770520699345	0.48529167986103	0.0130090605618627	0.0522394159361912	-0.0478708496191233	-0.052186220197136	4	-0.00870214832955134	0.0503663330462563	0.0251831665231281	0.741470811245776	0.91984051429006	0.0245096944241276	-0.00796630981005678	-0.0768687633842705	-0.0608089124881715	4	-0.0302835728145928	0.0469124670896341	0.0234562335448171	0.244189185386681	0.558116874893284	0.0368367681803713	0.0289191316987525	-0.115141901894687	-0.174573505020378	4	-0.0559898767589852	0.105494651834843	0.0527473259174216	0.329320945880074
H0Y4R4	NA	NA	NA	NA	0	NA	NA	NA	NA	NA	NA	NA	NA	NA	0	NA	NA	NA	NA	NA	NA	NA	NA	NA	0	NA	NA	NA	NA	NA	NA	NA	NA	NA	0	NA	NA	NA	NA	NA	NA	NA	NA	NA	0	NA	NA	NA	NA
H0Y5F3	NA	NA	NA	NA	0	NA	NA	NA	NA	NA	NA	NA	NA	NA	0	NA	NA	NA	NA	NA	NA	NA	NA	NA	0	NA	NA	NA	NA	NA	NA	NA	NA	NA	0	NA	NA	NA	NA	NA	NA	NA	NA	NA	0	NA	NA	NA	NA
H0Y5F5	0.00734820794479518	-0.0708696658485201	-0.0674792779873897	-0.139595902711175	4	-0.0676491596505724	0.0600314903563499	0.0300157451781749	0.0651013152926931	0.299073577656904	0.181262545376593	-0.0259018634427571	-0.108836492042906	-0.114276971892398	4	-0.0169381955003671	0.138183471423654	0.0690917357118271	0.814505929200125	0.91711174505479	0.181494390154449	-0.0564133089052664	0.0626556078497676	-0.0443347992358782	4	0.035850472465768	0.110864706126297	0.0554323530631486	0.54173314700948	0.824186866336012	0.0787119760140408	-0.0191935652333109	0.0419173890662409	-0.0625845373780228	4	0.00971281561723699	0.0628768764875564	0.0314384382437782	0.767808356191156	0.896516688647952	0.26466214542385	0.137651046122464	0.00602378762777001	-0.0725124997843678	4	0.083956119847429	0.148429208852776	0.0742146044263879	0.301124827104778
H0Y5K5	-0.0499684592740848	0.105542385237523	0.0393211667483045	-0.0404790693550703	4	0.0136040058391681	0.0732131029134896	0.0366065514567448	0.722940581535201	0.88938940172138	0.0462037899274677	0.0725879999566061	-0.0251785629959968	-0.00541349618636433	4	0.0220499326754282	0.0451747561989412	0.0225873780994706	0.366663214595704	0.647569730743912	-0.00917664637497634	0.106611190631036	0.0316679153660836	0.0207314415840865	4	0.0374584753015573	0.0492282332697294	0.0246141166348647	0.178874847577344	0.567406783028658	0.0442579196849145	-0.119189355210032	-0.113210610447991	-0.0985638344835895	4	-0.0716764701141745	0.0777737577083302	0.0388868788541651	0.114866893877795	0.398671205732003	0.116023796339483	0.0972619220307934	0.00802614053891776	-0.168599603975745	4	0.0131780637333624	0.130021796546882	0.0650108982734409	0.84606430150436
H0Y764	0.188495203871948	NA	0.153994814202272	0.0759001143592584	3	0.139463377477826	0.0576869615732194	0.0333055827930298	0.00408758693504918	0.0635505584304703	0.0989664508010208	NA	0.0377733426319251	0.112564782318015	3	0.0831015252503202	0.0398398263001541	0.0230015344388619	0.00758348275611213	0.100108595509725	0.126292974339155	NA	0.110542937246318	0.23427541285237	3	0.157037108145947	0.0673523028748688	0.0388858701953467	0.00476975915254345	0.113522027929146	-0.144035133717774	NA	0.0810437203560621	0.1485964920018	3	0.0285350262133627	0.153219415588394	0.0884612708350365	0.715690632762953	0.87789991327008	-0.120371484395939	NA	0.191890332939104	0.11384428567697	3	0.0617877114067117	0.162509309994573	0.093824793871187	0.466869917915127
H0Y7A7	-0.0525128956318465	-0.149657073939275	0.0963636770769904	0.113282336362338	4	0.00186901096705183	0.125511908028993	0.0627559540144967	0.977206675839101	0.992044029317993	0.0159180913238756	0.0725879999566061	0.145498821796296	0.0214531096663175	4	0.0638645056857737	0.0601050360663394	0.0300525180331697	0.0777341174108614	0.317125825820559	-0.030373649043519	-0.115122616203726	0.0481560381546526	-0.192645077942396	4	-0.072496326258747	0.104217778553589	0.0521088892767943	0.213546161404236	0.593656193398935	0.00448739099231388	-0.0321326209408091	0.16082279433506	0.0185938665752644	4	0.0379428577404573	0.0846634577692742	0.0423317288846371	0.404605724258812	0.690639810521959	-0.0728788799170959	-0.186860870687791	-0.0325586746912815	-0.121678556588252	4	-0.103494245471105	0.0664575533221256	0.0332287766610628	0.020727062013124
H0Y7W6	NA	NA	NA	NA	0	NA	NA	NA	NA	NA	NA	NA	NA	NA	0	NA	NA	NA	NA	NA	NA	NA	NA	NA	0	NA	NA	NA	NA	NA	NA	NA	NA	NA	0	NA	NA	NA	NA	NA	NA	NA	NA	NA	0	NA	NA	NA	NA
H0Y984	NA	NA	NA	NA	0	NA	NA	NA	NA	NA	NA	NA	NA	NA	0	NA	NA	NA	NA	NA	NA	NA	NA	NA	0	NA	NA	NA	NA	NA	NA	NA	NA	NA	0	NA	NA	NA	NA	NA	NA	NA	NA	NA	0	NA	NA	NA	NA
H0Y990	-0.101729886963826	-0.0548172605631541	0.0318421710415052	0.028233680728944	4	-0.0241178239391328	0.0654173494195182	0.0327086747097591	0.488728391439172	0.754558696282235	-0.180501108586956	-0.0193826700592163	0.00994966040760506	-0.0910695807310728	4	-0.0702509247424101	0.0848689826887099	0.042434491344355	0.148900375617074	0.438393175592461	-0.0764787298473609	0.18544558677869	0.168668845471887	0.00189703517259759	4	0.0698831843939535	0.128006773396133	0.0640033866980663	0.316783287236281	0.689019053728074	0.0464355729902847	0.015801856122893	0.122266383082575	0.0890631686921818	4	0.0683917452219837	0.0468243323049631	0.0234121661524815	0.0265895568414266	0.205051607988859	-0.527064117012955	-0.0630242871438074	0.0318400794319072	-0.114004628702831	4	-0.168063238356922	0.246845756082937	0.123422878041468	0.222206137643785
H0YA96	-0.285555705222401	-0.33350057705211	0.140149266084689	-0.0581810710885293	4	-0.134272021819588	0.218842139545197	0.109421069772599	0.265740682020763	0.580024607760842	-0.258772378979635	-0.178776412692552	0.057095440033546	-0.00541349618636433	4	-0.0964667119562513	0.147184735405295	0.0735923677026474	0.237850907403776	0.536584547075831	-0.248989670395516	-0.263034405833794	0.0463333025478348	-0.0700097212477425	4	-0.133925123732304	0.14887056519376	0.0744352825968799	0.12208496457028	0.483018672175939	0.0808382771224287	-0.0649972548464357	0.0778234175884197	0.0219489728336448	4	0.0289033531745144	0.068205807720374	0.034102903860187	0.42920380444645	0.704232025465002	-0.338906430062873	-0.231890118844038	0.186596033269591	-0.212993723334198	4	-0.14929855974288	0.230690818775536	0.115345409387768	0.243122322035011
H0YB09	0.172242365354856	-0.050831912611975	0.0452765726906555	0.104469266556029	4	0.0677890729973913	0.0945756800677132	0.0472878400338566	0.201690196804369	0.511372020989079	-0.12708383706792	0.0553982386590909	-0.130531563142225	-0.126022179565497	4	-0.0820598352791379	0.0916589310888823	0.0458294655444412	0.123559177621349	0.405120772080094	-0.0424352663203967	0.281359064046874	-0.105467150958559	-0.326681624857997	4	-0.0483062445225197	0.251312491837496	0.125656245918748	0.713914652167751	0.907972000800917	-0.0714009173035737	0.00317424779514364	-0.124294109577007	-0.188761643455168	4	-0.0953206056351512	0.0813307631868892	0.0406653815934446	0.057526554969309	0.287270908616381	0.0574716139843703	0.133218799807203	-0.0202629038925059	-0.054039839712889	4	0.0290969175465446	0.0836552491749125	0.0418276245874563	0.512683891384548
H0YBZ2	NA	NA	NA	NA	0	NA	NA	NA	NA	NA	NA	NA	NA	NA	0	NA	NA	NA	NA	NA	NA	NA	NA	NA	0	NA	NA	NA	NA	NA	NA	NA	NA	NA	0	NA	NA	NA	NA	NA	NA	NA	NA	NA	0	NA	NA	NA	NA
H0YC42	-0.0285200400100499	NA	0.240890159994971	0.337430929602664	3	0.183267016529195	0.189658503730467	0.109499388182887	0.101883374386288	0.376288879968151	0.0585521823551128	NA	-0.0201075734485748	0.110897890115377	3	0.0497808330073049	0.065941718948913	0.0380714691859816	0.178852962038061	0.472574526214748	-0.213706693470226	NA	-0.00188464434494295	0.185031893832521	3	-0.0101864813275493	0.19949888627261	0.115180735692522	0.919926249084629	0.98509991178988	0.151328779321585	NA	-0.113210610447991	0.00170028898983932	3	0.0132728192878111	0.132648840093074	0.076584843535428	0.844069726241847	0.932301647101833	-0.04786845189098	NA	0.0706767459700235	0.323341808906306	3	0.115383367661783	0.18960030576878	0.10946578757404	0.263330221082807
H0YD13	0.0255566327457428	-0.103520452138835	-0.048328177642478	-0.0821267667135617	4	-0.0521046909372831	0.0565403949482646	0.0282701974741323	0.114884150629538	0.402922823675364	0.0472368691272787	-0.0193826700592163	0.0231100256985786	-0.0346336351013579	4	0.00408264741632079	0.0377443136202488	0.0188721568101244	0.83589665584227	0.929013084783522	0.0271848293262302	-0.0257630960650818	0.020570206482753	-0.017186510816676	4	0.00120135723180635	0.0265549027259629	0.0132774513629815	0.930849954181106	0.985796402916747	0.101930685581988	0.0205088588004206	-0.0257477691976516	-0.0119584643080549	4	0.0211833277191755	0.057217412695613	0.0286087063478065	0.486980128724953	0.748956864798478	-0.0124909441831969	-0.207324973247506	-0.108618778313353	-0.0874628412503393	4	-0.103974384248599	0.080301028430594	0.040150514215297	0.0412332204253781
H0YD64	-0.234104173659944	-0.132708919666383	-0.0231825294683002	-0.16494405184047	4	-0.138734918658774	0.0878841676547356	0.0439420838273678	0.0196340430859987	0.167193555630913	-0.0378398060256701	-0.164320429608746	-0.11603199344711	-0.22991666411862	4	-0.137027223300036	0.0809368287582674	0.0404684143791337	0.0147476769308915	0.14809604469456	-0.0931094043914817	-0.115122616203726	-0.0343061220373204	-0.100213791091432	4	-0.0856879834309899	0.0354615748099501	0.017730787404975	0.00290220083857091	0.0819939545327089	-0.271147051621114	-0.1772923097736	0.011860155210061	-0.184888634307961	4	-0.155366960123154	0.119334526847727	0.0596672634238634	0.0404506024338293	0.244564342314932	0.0928872975415486	-0.159414988286121	0.161629117753016	0.108934371553164	4	0.0510089496404018	0.143322719497491	0.0716613597487453	0.503308364945828
H0YDU8	0.0565835283663674	0.0453834026473282	-0.0755345476073138	-0.00571365119439365	4	0.00517968305299702	0.0602554178596739	0.030127708929837	0.869149297099151	0.951281073544798	0.0513618041486337	0.00384547995129486	-0.0456426655557124	-0.0309485882935019	4	-0.00534599243732144	0.0431260638024931	0.0215630319012466	0.812459967235936	0.91711174505479	0.0259018634427571	-0.00212943956134715	-0.024694527253029	-0.0600806040040108	4	-0.0152506768439075	0.0363529325713017	0.0181764662856509	0.43359976154051	0.768033696507613	0.0222986671087744	-0.0127672960738779	-0.0714955912854187	-0.0171140208638476	4	-0.0197695602785925	0.0387358646597278	0.0193679323298639	0.346758950731924	0.6427052777821	-0.01338730646173	0.0572699465739046	-0.168416694937035	-0.0855855540096689	4	-0.0525299022086324	0.0967997493787055	0.0483998746893527	0.319445468365125
H0YEF3	NA	NA	NA	NA	0	NA	NA	NA	NA	NA	NA	NA	NA	NA	0	NA	NA	NA	NA	NA	NA	NA	NA	NA	0	NA	NA	NA	NA	NA	NA	NA	NA	NA	0	NA	NA	NA	NA	NA	NA	NA	NA	NA	0	NA	NA	NA	NA
H0YEW4	-0.440221826725637	-0.223994170186324	NA	0.0704798385750055	3	-0.197912052778985	0.256347918601946	0.148002539811034	0.170872458698315	0.478665260978569	-0.364705823728699	0.238438739891662	NA	-0.0383281186590995	3	-0.0548650674987124	0.301912146433183	0.174309059014816	0.722197801570043	0.871906056071584	-0.504898111791977	0.45749589442245	NA	-0.23223370633844	3	-0.0932119745693226	0.496030076938311	0.286383098446485	0.713274751442904	0.907972000800917	-0.233672346202451	-0.301027678195845	NA	-0.182956021773962	3	-0.239218682057419	0.0592309074184577	0.0341969803423923	0.000400545136000975	0.0209283571637292	-0.391540317970912	-0.0081370494383384	NA	-0.339269991660879	3	-0.24631578635671	0.207917964094405	0.120041492539264	0.0577574376658807
H0YFD6	0.0387649193026594	-0.0448744573155755	-0.0169640067331429	0.00189953291548151	4	-0.00529350295764438	0.0350986084405914	0.0175493042202957	0.773110798979066	0.91364892310935	0.0138057995250304	-0.0141884428789668	-0.00667143404288001	-0.0181245479359183	4	-0.00629465633318368	0.0142176942400819	0.00710884712004094	0.409984380102596	0.680845314360976	0.024617755622432	-0.00426202685415955	-0.0170510919392254	-0.0287589929814239	4	-0.00636358903809423	0.0229494888587513	0.0114747444293757	0.599233374675761	0.8464479229772	0.068033207488014	0.00475875651113575	-0.0257477691976516	-0.00682126585601406	4	0.010055732236371	0.0406454973641404	0.0203227486820702	0.638334298088854	0.833227982072214	0.0123837244558322	-0.0732320776602234	-0.0743183206898334	-0.0577154978562872	4	-0.0482205429376279	0.0411084024987127	0.0205542012493563	0.0573698204416193
H0YG20	-0.0486979219476802	NA	0.124764102878517	-0.0307376748768701	3	0.015109502017989	0.0953873221980913	0.0550718961483456	0.756256537720783	0.904694702623636	-0.00106747695649989	NA	0.0777397499495699	-0.299144699243075	3	-0.0741574754166682	0.19878904123968	0.114770906471677	0.474850709230473	0.730326371354536	0.117887736010616	NA	-0.0773748439292065	0.0794005691863667	3	0.0399711537559256	0.103430546175096	0.0597156536766217	0.459995078843843	0.779694430710785	0.0377051678857486	NA	-0.144837687060266	-0.2623540497538	3	-0.123162189642772	0.15119938463445	0.0872950054200055	0.152544242215566	0.452987469761942	-0.09737984176971	NA	0.0475004236039291	-0.180572245641821	3	-0.0768172212692006	0.11541837650741	0.0666368307459829	0.226728673811346
H0YHG0	-0.0499684592740848	-0.10558587130462	0.0122133642925727	-0.054228479463029	4	-0.0493923614372902	0.0482241154063993	0.0241120577031997	0.0864272073148243	0.342618045054565	0.0347908246543663	-0.0141884428789668	0.188479048362843	0.0839623111443283	4	0.0732609353206426	0.0866353972686661	0.0433176986343331	0.141741783234456	0.430558867898435	-0.174833801825935	0.116458976587383	0.276780413202615	0.0990293759352991	4	0.0793587409748404	0.187396662050483	0.0936983310252416	0.429499374611711	0.766460030620989	0.0464355729902847	0.0893308915448581	0.168411949346743	0.119136891528136	4	0.105828826352505	0.0512948739488883	0.0256474369744441	0.00617257117362807	0.0961839312261734	-0.0654230749980486	0.140598330172801	0.091599519333844	0.031478231473168	4	0.049563251495441	0.0887005385050327	0.0443502692525164	0.306503138139165
H0YHS6	0.171152304826315	NA	0.0348384235014249	0.022630974499568	3	0.0762072342757691	0.0824510780352159	0.0476031520986068	0.113884846589253	0.401813507901153	0	NA	0.151503804621624	-0.100693999619473	3	0.0169366016673837	0.126949082206361	0.0732940867852185	0.793454192768212	0.909082581075108	0.2088881569867	NA	0.16026640447619	0.0954803088542285	3	0.154878290105706	0.0568955959355511	0.0328486876290946	0.00243947937638669	0.0722994721060486	0.163418473316995	NA	0.0583491730852669	0.0185938665752644	3	0.0801205043258419	0.0748266986273237	0.0432012145950564	0.0774530493190472	0.332239816225129	0.260960077595935	NA	0.112223191459695	-0.0267669095627853	3	0.115472119830948	0.143891005405236	0.0830755107046792	0.157538582856812
H0YIC4	-0.0135696985440784	-0.0668397888123671	0.0437900243459533	-0.00571365119439365	4	-0.0105832785512215	0.0452912169177734	0.0226456084588867	0.656744581541147	0.856118529538114	-0.121268855229699	-0.296798387049521	-0.0133738620833715	-0.0834160081876375	4	-0.128714278137557	0.120641406417275	0.0603207032086375	0.0768017279289839	0.314799107898242	0.0412226627265128	0.0847064973029538	0.0279781562170223	-0.046293652273935	4	0.0269034159931384	0.0544830337669866	0.0272415168834933	0.361491039320018	0.717154868507464	0.151328779321585	0.0468956252244614	0.104969559601543	0	4	0.0757984910368972	0.0661729113389397	0.0330864556694698	0.061865758918363	0.295241196170127	-0.148650967875566	-0.550486902574088	0.21980307865951	0.142957953842043	4	-0.0840942094870252	0.349092139620219	0.17454606981011	0.647025718479538
H0YIV4	-0.0756170466446951	-0.0428940931873347	0.00153233688424644	0.057752767648999	4	-0.0148065088246961	0.057788812027856	0.028894406013928	0.626657522754826	0.841032110904542	-0.0139391909578739	0.0541625254864219	0.102749174336959	0.0425918767244679	4	0.0463910963974937	0.0479263521861762	0.0239631760930881	0.101009908934474	0.361792108634088	-0.0682347357524524	-0.124370693005741	-0.0655007436409147	-0.0961498587115326	4	-0.0885640077776603	0.027597447316313	0.0137987236581565	0.000675327697160042	0.0358160636581545	-0.119415166944771	-0.0337581929898511	0.0713611669587229	0.00509486712276347	4	-0.0191793314632839	0.0796797433261905	0.0398398716630953	0.647278806864304	0.838617578867917	-0.219286510468626	-0.153987915901793	-0.0978120233567698	-0.054039839712889	4	-0.13128157236002	0.0715237562896611	0.0357618781448305	0.0104419133501561
H0YJ34	0.0387649193026594	0.205554117212453	0.0273360922895941	-0.00762324120302504	4	0.0660079719004204	0.095100614091972	0.047550307045986	0.21443264031462	0.526588035476115	-0.0139391909578739	0.0329918256108112	0.108934371553164	-0.066342494828696	4	0.0154111278443513	0.0743881130327798	0.0371940565163899	0.693027631218535	0.852310900871557	-0.0654971731836218	-0.0742245850217269	0.0261297318246536	0.0393231298110315	4	-0.0185672241424159	0.0595798424822736	0.0297899212411368	0.556041154530361	0.834833988013849	0.0222986671087744	-0.0191935652333109	0.00339857646186492	0.0135465318379478	4	0.00501255254381904	0.0178902172148056	0.00894510860740282	0.595516466817317	0.816438221854308	-0.103093492964104	0.216584930035289	0.0475004236039291	0.0105692417101873	4	0.0428902755963256	0.132346762156461	0.0661733810782307	0.540882714437806
H0YJ75	0.238266500684852	0.139074421657003	0.257658373375863	0.165059246270496	4	0.200014635497053	0.056925666753049	0.0284628333765245	0.000414655546833876	0.0181667205518668	0.00319769995904945	-0.112058507192472	0.116628763343165	0.359966116785168	4	0.0919335182237276	0.201608631511329	0.100804315755665	0.396931172374585	0.67180088681734	0.110644063683992	0.0481291708742791	-0.00755339443163505	-0.10225005824795	4	0.0122424454696715	0.09031637764435	0.045158188822175	0.795398623628092	0.93811771145716	0.290119356656686	0.0530347623218681	-0.0136749368970766	0.134716902995595	4	0.116049021269268	0.13095555686704	0.0654777784335201	0.126712624847163	0.415007870978304	-0.145699664341964	-0.00976998118130398	0.114083533485223	0.0757675076179648	4	0.00859534889498006	0.115157996471877	0.0575789982359385	0.886224547568956
H0YKT5	0.286377852809784	0.494454814599754	-0.0771510128082319	0.146289442250656	4	0.21249277421299	0.240303975262743	0.120151987631372	0.127382305614921	0.421309310584142	-0.0236689058936324	0.360429264270272	0.102749174336959	0.196691911005098	4	0.159050360929674	0.161788445284716	0.0808942226423582	0.0968654925840769	0.355665665332392	0.171086124274316	0.465223256447061	0.0149891742194532	0.0794005691863667	4	0.182674781031799	0.19895725126205	0.0994786256310249	0.115967752628797	0.47865815757495	0.179382066797291	0.238194277459341	0.023623604525899	0.143984783095988	4	0.14629618296963	0.0905425122081823	0.0452712561040911	0.0178757015691458	0.162765800733517	0.112741212350182	0.539350745864155	0.108495295222943	0.207157907641288	4	0.241936290269642	0.203439394425378	0.101719697212689	0.0548832842880333
H0YMJ0	NA	NA	NA	NA	0	NA	NA	NA	NA	NA	NA	NA	NA	NA	0	NA	NA	NA	NA	NA	NA	NA	NA	NA	0	NA	NA	NA	NA	NA	NA	NA	NA	NA	0	NA	NA	NA	NA	NA	NA	NA	NA	NA	0	NA	NA	NA	NA
H3BLV9	0.0219332862428659	0.231965748043249	-0.0901483533371051	0.0449124218755744	4	0.052165775706146	0.133601342232156	0.0668006711160779	0.464537779561734	0.743366044403359	-0.00748897883819793	0.0991933565387758	0.0132510234978562	-0.114276971892398	4	-0.00233039267349101	0.0877657864129557	0.0438828932064779	0.9593723747735	0.986792340571721	0.024617755622432	0.0440071822390924	0.0224257630612349	0.0811960828479809	4	0.043061695942685	0.027209961836334	0.013604980918167	0.0194379724710654	0.241327949518492	0.0507810432662489	0.0499684592740846	-0.0153934541233759	-0.0188366420128555	4	0.0166298516010255	0.0389920117140033	0.0194960058570017	0.426400164520416	0.703606821694988	-0.197730367102179	0.128772894776011	0.250572622616385	-0.0743728418098956	4	0.0268105771200805	0.20093322864826	0.10046661432413	0.798511423662845
H3BMM9	0.130229885875585	-0.26958074449027	-0.228794735211222	-0.114685441404843	4	-0.120707758807688	0.179677424068981	0.0898387120344907	0.227658530676417	0.538633137014154	-0.0744499491598812	0.197610228140725	-0.240251930378622	-0.135883428081773	4	-0.063243769869888	0.18688570086573	0.0934428504328651	0.523742991758968	0.761774597724102	-0.0184120371138804	-0.00426202685415955	-0.0151465437538654	0.0226014289371326	4	-0.00380479469619317	0.0186145508546028	0.0093072754273014	0.696878694336361	0.898747565264002	-0.00450139223494084	-0.10544929858373	-0.357233047755981	-0.12244093650153	4	-0.147406168769046	0.149256754263226	0.074628377131613	0.0956578857727308	0.367905583576292	0.147643554066306	0.309868899741388	-0.0141540943098603	0.0554951125917036	4	0.124713368022384	0.140099611393251	0.0700498056966256	0.125315429991574
H3BN98	0.288389980110688	0.205554117212453	0.0571141368751583	0.00758317141906417	4	0.139660351404341	0.130026599629285	0.0650132998146426	0.0752950724517319	0.322403688415843	0.071811402960596	0.149819429608744	0.0132510234978562	-0.0872377191400459	4	0.0369110342317875	0.0998983659454548	0.0499491829727274	0.487814067364336	0.737330962821193	0.120294233717712	0.0705919678300537	0.00188218557797637	-0.108376161044792	4	0.0210980565202374	0.0990325729873474	0.0495162864936737	0.684909077911298	0.894375871501449	0.0723142048158901	-0.0240321221696921	-0.0205613224823165	0.0169133829363464	4	0.011158535775057	0.0447871482166254	0.0223935741083127	0.63601397902843	0.832685257082262	0.150047378628362	0.208180857488425	0.214610409439187	-0.258797412947323	4	0.0785103081521629	0.226739013038597	0.113369506519299	0.51450752660183
H3BNC9	-0.0461601991457803	-0.203940943283194	0.0228158952522118	0.0485927683635231	4	-0.0446731197033099	0.113463274601231	0.0567316373006155	0.460985666896218	0.742118765610475	0.0441354095862386	-0.0576107231700952	0.00332418359256517	0.00718654059326923	4	-0.000741147349505568	0.0421403574111067	0.0210701787055534	0.973081086961705	0.989713724066933	0.00391505000338302	-0.0719861128257274	0.0371849203336494	0.0411691889764045	4	0.00257076162192737	0.0524357168865364	0.0262178584432682	0.925083181751364	0.985796402916747	0.0178664207935137	0.0637157897301943	0.00170028898983932	0.0599821048282324	4	0.0358161510854449	0.0308137849070054	0.0154068924535027	0.0590689842474805	0.28778274024841	-0.0850773496853885	-0.235706774617329	-0.0428858128531764	-0.0485438519580369	4	-0.103053447278483	0.0903907914798839	0.0451953957399419	0.0627845904819434
H3BNT2	NA	-0.0212876369979597	0.158122699824948	0.279101270675869	3	0.138645444500953	0.151138666692498	0.0872599498998751	0.116001241046235	0.404932738663704	NA	-0.0602848574684207	0.147002412386683	0.188812617575512	3	0.0918433908312582	0.133395188303512	0.0770157478756337	0.213378654956801	0.511939423757467	NA	-0.0279309327477919	0.0698511092539716	0.0972559337440798	3	0.0463920367500865	0.0658079322541769	0.0379942274017617	0.204270528073311	0.591614143431961	NA	0.0499684592740846	0.011860155210061	0.16234382245791	3	0.0747241456473519	0.0782366060929858	0.0451699255882681	0.104945845366858	0.3836170381427	NA	-0.0295107002309054	0.324742326039242	0.412383045832866	3	0.235871557213734	0.233968012485245	0.135081494990118	0.0912422533565908
H3BP35	0.0291709019618616	-0.0528232104310665	0.0378284661072364	-0.141691320713368	4	-0.0318787907688342	0.0838324262870198	0.0419162131435099	0.475748954248538	0.748666886357798	-0.0477326107841018	-0.0710312389324169	-0.0285691521967709	-0.0476059322471102	4	-0.0487347335401	0.0173787539446032	0.00868937697230159	0.00137006152765293	0.0447982387321587	0.195256291398934	-0.0899919008800436	0.0929916862207262	-0.0600806040040108	4	0.0345438681839014	0.133800322523406	0.0669001612617032	0.624081229884205	0.863036394300069	-0.146520397107369	-0.110586497035771	-0.0449258708815163	-0.144837687060266	4	-0.11171761302123	0.0475064533368123	0.0237532266684061	0.00331494241183179	0.0681705504147449	0.281570357271221	-0.00976998118130398	-0.0679767938160067	0	4	0.0509558955684777	0.156644129532398	0.0783220647661988	0.539407494007703
H3BP71	NA	NA	NA	NA	0	NA	NA	NA	NA	NA	NA	NA	NA	NA	0	NA	NA	NA	NA	NA	NA	NA	NA	NA	0	NA	NA	NA	NA	NA	NA	NA	NA	NA	0	NA	NA	NA	NA	NA	NA	NA	NA	NA	0	NA	NA	NA	NA
H3BPE1	-0.0335381147766745	0.112666819670905	0.128976354165432	0.201881768213974	4	0.102496706818409	0.0986364808003975	0.0493182404001987	0.0829328366111085	0.337423909926489	-0.124755031007947	0.0417468288865637	-0.0116953336323747	0.179300308119812	4	0.0211491930915136	0.126231062382735	0.0631155311913673	0.748964441500739	0.887220027527996	0.0923741482602751	0.0398733827320791	0.0261297318246536	0.190032574890887	4	0.0871024594269737	0.0743206085579872	0.0371603042789936	0.0575311336651193	0.36691269423978	-0.0203677976939618	0.133453444777166	-0.236067358233524	-0.107700629055713	4	-0.0576705850515083	0.155186239410815	0.0775931197054076	0.485407497243898	0.748284989377004	-0.230707689548452	0.0478814424592646	-0.034618196869576	0.426922468431697	4	0.0523695061182335	0.27568679298001	0.137843396490005	0.717089162454344
H3BPJ9	0.167877172793454	0.193845223624192	-0.0966911992038771	0.00189953291548151	4	0.0667326825323125	0.1382009508216	0.0691004754108002	0.371472856056466	0.674278299089471	0.0513618041486337	0.0615609778075823	0.0296454617485248	0.00718654059326923	4	0.0374386960745025	0.0241637802435403	0.0120818901217701	0.0211503254821438	0.173272178678918	0.184947192059965	0.0253110885291873	0.0131240219998903	-0.0581029545635683	4	0.0413198370063686	0.102575163684874	0.0512875818424371	0.451184329225711	0.772904530692658	0.157386290141953	-0.056710643661475	0.0101718050572912	0.00678916566263907	4	0.0294091543001021	0.0906945540281137	0.0453472770140568	0.54065207279921	0.784633325046573	0.159622823343346	0.222160569983456	-0.10428635751732	-0.0195803689695161	4	0.0644791667099915	0.152166080366408	0.0760830401832038	0.429229256286982
H3BQV3	NA	-0.0528232104310665	0.325297090251226	0.311627174197317	3	0.194700351339159	0.2144706317303	0.123824676962758	0.118974083152863	0.41100642810806	NA	-0.202211568252541	0.28177096841538	0.188812617575512	3	0.0894573392461168	0.256833365139369	0.148282812500092	0.503163518586022	0.74795271924507	NA	-0.235216461694032	0.306020033543428	0.195015982405143	3	0.0886065180848463	0.285878412121187	0.16505197819367	0.549356842605848	0.830768251724601	NA	-0.0451887737662554	0.426897654488905	0.951559644942247	3	0.444422841888299	0.498605256384761	0.287869878993104	0.124308341270258	0.410602465395197	NA	-0.510637389967522	0.21980307865951	0.40705944185532	3	0.038741710182436	0.484901312795205	0.279957903472714	0.875108258857933
H3BQZ7	-0.0964693705031311	-0.0428940931873347	-0.165523912288713	-0.096280861023422	4	-0.10029205925065	0.0502673645601316	0.0251336822800658	0.00719775642219505	0.0920299794287133	-0.087996480997829	-0.0377111657323905	-0.0184211968206881	-0.0929893348944384	4	-0.0592795446113365	0.0369486668591435	0.0184743334295718	0.0183959476600836	0.163561616989508	-0.0532420212769795	0.00212630110838796	-0.0734059417262609	0.0540258816825108	4	-0.0176239450530854	0.0574573708686624	0.0287286854343312	0.562090426380538	0.835397914920534	-0.0249332921397541	-0.050115454846182	0.0319677286586358	-0.0554951125917036	4	-0.024644032729751	0.0400231502665808	0.0200115751332904	0.26421473270606	0.582582886192865	0	0.143539605484923	-0.0700875404118141	-0.00176909285305571	4	0.0179207430550133	0.0898784349861755	0.0449392174930878	0.70386199465756
H3BR70	0.0577636470750246	0.317695622069133	0.0906158804666717	0.249027547839915	4	0.178775674362686	0.124699823049701	0.0623499115248503	0.028527847838669	0.197797440404349	0.0201334194970414	0.121782368306461	0.119695066390948	0.348695004450148	4	0.152576464661149	0.139084032852824	0.069542016426412	0.070682302837129	0.298842799268029	0.0168890137051457	0.314247357805738	0.124431805436457	-0.0210336998721968	4	0.108633619268786	0.150285593082602	0.0751427965413008	0.198396657917196	0.587765669859156	-0.0904152952222185	0.324468051601333	0.126947928697037	0.045218752156492	4	0.101554859308161	0.173552486269277	0.0867762431346386	0.286253053309588	0.5971456473262	-0.130060540564373	0.220768678856784	0.49573797320111	0.220876188889068	4	0.201830575095647	0.25642065601534	0.12821032800767	0.166503647194321
H3BST1	0.232007510213169	-0.784484772737346	-0.193302292306911	0.406458514390061	4	-0.0848302601102567	0.530104848579305	0.265052424289653	0.759781616904118	0.906026431790544	-0.0823366265794607	-0.0723801825004357	0.0165448492228981	0.552786609043652	4	0.103653662296663	0.302703733728226	0.151351866864113	0.519003061081921	0.758154574187333	-0.222828083438774	-0.67382243211128	0.138188239017125	0.555557862152367	4	-0.0507261035951405	0.523175242165102	0.261587621082551	0.852639981624288	0.961610611175867	0.141176062960694	-0.235961437375881	-0.102211611498734	0.374055216386032	4	0.0442645576180279	0.269651376699535	0.134825688349768	0.753832671921498	0.893661242046545	0.221122778518529	-0.361411381193045	0.0160078762003921	0.753839412730602	4	0.157389671564119	0.465101260322896	0.232550630161448	0.523754945231934
H3BU93	-0.0717405686091719	-0.151789661232087	NA	0.285353479988208	3	0.020607750048983	0.232743830097014	0.134374712958736	0.861763371691601	0.947657574617574	0.0169730786037136	-0.021986813439374	NA	0.468083733640478	3	0.154356666268273	0.272393048550207	0.157266199905845	0.293587778959541	0.592421887953057	0.00911864461092279	0.00636952487572728	NA	0.173295785781552	3	0.0629279850894007	0.0955912024563267	0.0551896064703202	0.231107588130895	0.614693746169882	-0.0364106401896849	-0.0817146497913695	NA	0.306878508014068	3	0.062917739344338	0.212487072098379	0.122679468275314	0.566690842950802	0.805031211579076	0.158031322861059	-0.159414988286121	NA	0.171495709317539	3	0.0567040146308256	0.187285584047528	0.108129382365177	0.558300487940686
H3BUD0	NA	0.128569314263533	0.149855083841348	-0.125012579566738	3	0.0511372728460475	0.152921054388905	0.088289011916196	0.519589574234589	0.774923053222871	NA	0.0317367624251871	0.195761724306539	0.0107664308690703	3	0.0794216392002654	0.101297582662641	0.0584841866185341	0.165490527636637	0.457292381211659	NA	0.249494565391624	0.251689432239785	-0.0114348950622836	3	0.163249700856375	0.151285278195101	0.0873445960903688	0.0757910976561691	0.413831418922234	NA	0.199974955228851	0.208717484439371	0.0648698397378648	3	0.157854093135362	0.0806452818779048	0.0465605752010816	0.00980432138608362	0.128305037013553	NA	0.315096061404937	0.410503095208037	0.074088979166968	3	0.266562711926647	0.173378859370483	0.100100331129339	0.0244602608771746
H7BXH2	0.0267623954911399	0.0893825954137051	0.0182814911814052	-0.0114500207435382	4	0.030744115335678	0.0423870560394076	0.0211935280197038	0.197071940141969	0.507581539305803	-0.00427465510032587	-0.0429909338973191	0.0554951125917036	-0.040178914347041	4	-0.00798734768824556	0.0458452282536632	0.0229226141268316	0.739404232541022	0.881395502749018	0.0626523408736027	0.0357277044745257	0.0298242153823952	-0.0740005814437769	4	0.0135509198216867	0.0600911664309561	0.030045583215478	0.667822284926107	0.885062151394837	0.00224544020564421	-0.0240321221696921	0.00170028898983932	-0.0205613224823165	4	-0.0101619288641313	0.014085272090713	0.0070426360453565	0.199145618872927	0.509609145169524	-0.0841353352602192	0.124313246585311	0.091599519333844	-0.0339894279810237	4	0.0244470006694781	0.0994780841955729	0.0497390420977864	0.64053006187149
H7BXI1	0.031575394253272	-0.0608160011845971	0.0197945432769748	0.041222662726513	4	0.00794414976804069	0.046670066516609	0.0233350332583045	0.745129202637355	0.899554848473731	0.0243364670171999	-0.0259018634427571	0.0116012862787634	0.0107664308690703	4	0.00520058018056912	0.0216447984267866	0.0108223992133933	0.647863451299109	0.828270622765444	0.0220461060272576	0.0357277044745257	-0.024694527253029	0.0937024958863253	4	0.0316954447837699	0.0487649880870743	0.0243824940435372	0.241328851040003	0.620354691066266	0.0507810432662489	-0.0224174661075973	-0.0379224831437538	-0.0153934541233759	4	-0.00623809002711954	0.0391606742825201	0.0195803371412601	0.760836171799798	0.896516688647952	0.0316316090491107	-0.0212525492285966	0.106627728566176	0.082462160191973	4	0.0498672371446657	0.0567883337217809	0.0283941668608904	0.129565748114899
H7BXY3	0.344586778802876	0.170138433655275	0.0408123245460578	-0.184251782941414	4	0.0928214385156985	0.222739176536041	0.11136958826802	0.436503744046158	0.727426029907132	0.24837674123513	0.0701448240282773	0.099646603160818	-0.0758028240777623	4	0.0855913360866158	0.132895081840057	0.0664475409200286	0.245152623849446	0.545324784324412	0.488596972011399	0.187315574131736	-0.0170510919392254	0.0954803088542285	4	0.188585440764535	0.216766756840014	0.108383378420007	0.132513149862529	0.50010892888193	0.093530690725586	0.0545654733841815	0.290279724250026	-0.0136749368970766	4	0.106175237865679	0.130488797296577	0.0652443986482883	0.15478767627778	0.456151193744494	0.285219979862336	0.34606744847278	0.38915203895187	0.234465253637023	4	0.313726180231002	0.0678967739519869	0.0339483869759934	9.0665502466401e-05
H7BY55	-0.00615222698159534	-0.0154506969756756	NA	-0.0641303374197157	3	-0.0285777537923289	0.0311384816263487	0.0179778107491286	0.115870677425504	0.404932738663704	-0.075573981192502	0.153286059328523	NA	0.0958085539924367	3	0.057840210709486	0.119060597409724	0.0687396679643817	0.360715226764353	0.64523202988677	-0.0250451294463276	0.249494565391624	NA	-0.046293652273935	3	0.059385261223787	0.164981925006872	0.0952523588141401	0.489694070376007	0.797286247242388	0.0808382771224287	0.19581932573754	NA	-0.0484403550577532	3	0.0760724159340717	0.122199562152262	0.070551950103463	0.25388934931666	0.568103259055709	-0.0860199796051622	0.162513106601241	NA	0.120364952329568	3	0.0656193597752158	0.133003697929476	0.0767897208027986	0.353931684400845
H7BZJ3	0.0482955570407812	0.0379179524007625	-0.0852606184274728	0.0207585601667974	4	0.00542786279521708	0.0615160576350725	0.0307580288175363	0.86573072610889	0.948913700154886	0.0116904105230251	0.0492090612522922	0.122754866140006	0.161696489648894	4	0.0863377068910544	0.0682053536719124	0.0341026768359562	0.0445773698244525	0.245013434507854	0.103363837767834	0.249494565391624	0.0734354466030104	-0.0326372077923516	4	0.0984141604925292	0.116401869009219	0.0582009345046093	0.141802309704961	0.515167294873684	0.0808382771224287	0.120357787165483	0.142444265020205	0.100216029630908	4	0.110964089734756	0.0264721763931595	0.0132360881965797	0.000156775734171638	0.0121521293436118	0.158827292558982	0.0850743518453265	-0.163901213814542	-0.017789313443528	4	0.0155527792865595	0.139852620035099	0.0699263100175496	0.831367303086487
H7BZV4	NA	NA	NA	NA	0	NA	NA	NA	NA	NA	NA	NA	NA	NA	0	NA	NA	NA	NA	NA	NA	NA	NA	NA	0	NA	NA	NA	NA	NA	NA	NA	NA	NA	0	NA	NA	NA	NA	NA	NA	NA	NA	NA	0	NA	NA	NA	NA
H7C0E5	-0.122965891964345	-0.201729915967841	-0.0901483533371051	0.041222662726513	4	-0.0934053746356946	0.101231330906488	0.0506156654532441	0.114520337411543	0.402922823675364	-0.103963229402895	-0.200735665268693	-0.0664012257225098	0.127480774310981	4	-0.0609048365207791	0.137751024834217	0.0688755124171085	0.410579228607363	0.680845314360976	-0.0600375827858328	-0.371718461598894	0.158580027848303	-0.017186510816676	4	-0.0725906318382749	0.220714391695025	0.110357195847512	0.535086394402006	0.817963287425787	-0.0226487389452003	-0.338708453467864	0.0419173890662409	0.106550595421023	4	-0.05322230198145	0.19749770041217	0.0987488502060852	0.609310500137175	0.82160721952993	0.0497680920509911	-0.545741190923438	-0.398366467451565	-0.123603433512744	4	-0.254485749959189	0.267850688440247	0.133925344220123	0.106139498698193
H7C1I0	0.347484727633105	0.322312250139503	-0.272571394666867	-0.145891309242654	4	0.0628335684657717	0.318547763308659	0.15927388165433	0.706852510007424	0.879709813813274	0.135367779405944	0.117056090399286	-0.00834412413273689	-0.390629862589981	4	-0.036637529229372	0.244484930526293	0.122242465263147	0.774508518541548	0.899822925269446	0.139403056665416	-0.101360714959241	-0.146572354288233	-0.0660298703351972	4	-0.0436399707293136	0.126402554538752	0.063201277269376	0.515692775024553	0.806501511932872	-0.156504485679991	-0.262398997305183	-0.11874171642122	-0.082262022154489	4	-0.154976805390221	0.0777652075084432	0.0388826037542216	0.00723548896814141	0.106696990978983	-0.0178774907302559	0.175503945121002	0.119650209359765	0.0907870248429047	4	0.0920159221483538	0.0812649497882494	0.0406324748941247	0.0641424126252249
H7C2N1	0.0683414992425392	-0.0628211370749741	-0.101617880283804	-0.0385255212693154	4	-0.0336557598463885	0.0727933707631986	0.0363966853815993	0.390799450583893	0.690062347613965	0.203673792796852	0.130016280005676	0.204452684570583	-0.0236066129523338	4	0.128634036105194	0.107329024286877	0.0536645121434387	0.0535129188768522	0.265195989778236	0.105794664022597	-0.00212943956134715	-0.0853455550377862	-0.036525876025114	4	-0.0045515516504127	0.0811011350987227	0.0405505675493613	0.914291087462774	0.982895432930287	0.114439680488566	-0.0191935652333109	0.050156674972159	-0.105868635106823	4	0.00988353878014794	0.0945127081491517	0.0472563540745759	0.841253363460195	0.931541728109952	0.295390077653882	0.0384314411544521	-0.177490278562497	-0.131328726621972	4	0.00625062840596623	0.213951727923254	0.106975863961627	0.955303311938343
H7C488	0.186338708640991	0.212202493221819	NA	0.0686685451281826	3	0.155736582330331	0.0765040271154849	0.0441696206492157	0.00837412506740256	0.100456270153801	-0.0323729747744927	0.106365011941031	NA	0.0355799793690945	3	0.0365240055118775	0.0693738108257567	0.0400529883549608	0.325466895269506	0.619966240957603	-0.0614005446641434	0.3447279642605	NA	-0.0961498587115326	3	0.0623925202949413	0.245126204017671	0.141523679875033	0.620773399935335	0.861219820103036	0.163418473316995	0.386555732350992	NA	0.00848147675509101	3	0.186151894141026	0.190059574878169	0.109730946717977	0.0984077141738786	0.373788749315493	0.235530890795572	0.482409849390711	NA	0.261265312980738	3	0.326402017722341	0.135718081985051	0.0783568711679691	0.00417994331162749
H7C4C5	NA	NA	NA	NA	0	NA	NA	NA	NA	NA	NA	NA	NA	NA	0	NA	NA	NA	NA	NA	NA	NA	NA	NA	0	NA	NA	NA	NA	NA	NA	NA	NA	NA	0	NA	NA	NA	NA	NA	NA	NA	NA	NA	0	NA	NA	NA	NA
H7C4T5	-0.129666763466949	-0.0588136482734494	0.227857595842621	-0.0133672237378289	4	0.00650249009109832	0.155135587917284	0.0775677939586419	0.93591874646296	0.980098888796896	0.0021325872928124	-0.0873024081069004	-0.186240995728513	-0.192387798398087	4	-0.115949653735172	0.0922817118881292	0.0461408559440646	0.0457205691723348	0.246369484149676	-0.128384879139012	0.0786743141279124	0.195232450519776	-0.0920973418870598	4	0.0133561359054041	0.151169231380331	0.0755846156901656	0.865554349546369	0.964965491807101	-0.119415166944771	-0.00796630981005678	-0.222108900643605	-0.252187023596801	4	-0.150419350248808	0.110679987783198	0.0553399938915992	0.0347305374970072	0.229104433738807	-0.0341588614811978	-0.046170181432926	-0.0161874914623886	-0.260914353959424	4	-0.0893577220839842	0.115032804696451	0.0575164023482254	0.171271339609967
H7C5I5	0.0823257286782404	-0.181981690707054	0.0920549778836438	0.206830984185707	4	0.0498075000101343	0.164544713374359	0.0822723566871793	0.567092763367794	0.801713074029433	-0.169658255570999	-0.0576107231700952	0.151503804621624	0.2461252708096	4	0.0425900241725325	0.190068698297426	0.0950343491487132	0.66977047311173	0.839613202748928	-0.0437816920279134	-0.0697511084424191	-0.0170510919392254	0.00946032924906631	4	-0.0302808907901229	0.0341299568483975	0.0170649784241987	0.126344111139429	0.492188463884657	-0.0272214687350244	0.120357787165483	-0.0840642647884744	0.0468666050379743	4	0.0139846646699895	0.0888969463104096	0.0444484731552048	0.763698850951162	0.896516688647952	-0.235929175671196	-0.201715004904923	0.125195488605448	0.163625013086574	4	-0.0372059197210241	0.21076167627779	0.105380838138895	0.736115184572586
H9KV45	-0.110982200202023	-0.00192231213102856	0.175874968802568	0.0650391217274915	4	0.0320023945492521	0.120258364954314	0.0601291824771568	0.613691045421074	0.833043569963137	-0.0258400049352596	-0.0154852474974187	0.0312747053331833	0.00718654059326923	4	-0.000716001626556419	0.0253981736296778	0.0126990868148389	0.95686807683156	0.986323352536948	-0.0986958394100609	0.0460696486959847	0.0912247600465384	-0.10225005824795	4	-0.0159128722288721	0.0993771175787735	0.0496885587893868	0.759636351218788	0.925572893576831	-0.0952083064111178	0.0667530435696483	-0.0257477691976516	0.0169133829363464	4	-0.00932241227569365	0.0686099387696848	0.0343049693848424	0.794922070417296	0.910245991996774	-0.075684770670391	-0.13961474555199	-0.266660788239743	0.00881306980630919	4	-0.118286808663954	0.116102011833584	0.0580510059167922	0.0877311422646456
H9KVA9	NA	NA	NA	NA	0	NA	NA	NA	NA	NA	NA	NA	NA	NA	0	NA	NA	NA	NA	NA	NA	NA	NA	NA	0	NA	NA	NA	NA	NA	NA	NA	NA	NA	0	NA	NA	NA	NA	NA	NA	NA	NA	NA	0	NA	NA	NA	NA
I3L0A0	-0.00122834834231003	-0.0115724821647479	0.121949087271463	0.00569111207785572	4	0.0287098422105653	0.0625629807130568	0.0312814903565284	0.394124978645713	0.692295067080761	0.0232868525359158	0.0317367624251871	0.0165448492228981	-0.00722251841823834	4	0.0160864864414407	0.0167361506351756	0.00836807531758778	0.10292820812992	0.364469674869744	-0.0917161690916153	-0.00212943956134715	0.0787953105050205	-0.110423989693651	4	-0.0313685719603981	0.0873357494878139	0.043667874743907	0.499549010037859	0.800931805559455	-0.28203536776385	-0.0451887737662554	-0.066142356791212	-0.175251357048927	4	-0.142154463842561	0.109304249829105	0.0546521249145526	0.0406034673420083	0.244998566416948	0.00443497134034143	0.00486029109053476	0.148981741469813	-0.041248286267517	4	0.0292571794082931	0.0826969197812983	0.0413484598906491	0.505750034763527
I3L2A9	NA	0.24661252400765	0.337482087017119	-0.0641303374197157	3	0.173321424535018	0.210598726995057	0.121589231721589	0.14915228631316	0.451597499341472	NA	-0.268693049369167	-0.10167670047004	-0.18213405913753	3	-0.184167936325579	0.0835267483636877	0.0482241906523092	0.00603168805096017	0.0908507736676442	NA	0.0357277044745257	0.275224946700574	0.176658712807516	3	0.162537121327538	0.120371494831277	0.0694965149435953	0.0382014678386004	0.311275033089189	NA	-0.050115454846182	0.177466550454932	-0.129867954401599	3	-0.000838952930949858	0.159482772422615	0.0920774215893047	0.991732218733997	0.997178086257264	NA	0.305936062119461	0.121501005047706	-0.0231691644541809	3	0.134755967570995	0.16495251760171	0.0952353804408537	0.151582456210164
I3L2C7	NA	NA	NA	NA	0	NA	NA	NA	NA	NA	NA	NA	NA	NA	0	NA	NA	NA	NA	NA	NA	NA	NA	NA	0	NA	NA	NA	NA	NA	NA	NA	NA	NA	0	NA	NA	NA	NA	NA	NA	NA	NA	NA	0	NA	NA	NA	NA
I3L397	-0.167777905205421	-0.226239610391969	-0.0690867378092754	-0.141691320713368	4	-0.151198893530008	0.0651633150201859	0.0325816575100929	0.00353821143635666	0.0571943472920629	-0.105110501861677	-0.0589471707329094	-0.145178339106627	-0.0987639725210735	4	-0.101999996055572	0.035299018737938	0.017649509368969	0.00117315879002591	0.0424571476898328	-0.0263754154242975	0.012711051749554	-0.024694527253029	-0.0740005814437769	4	-0.0280898680928873	0.0355292196543846	0.0177646098271923	0.16491054889647	0.55339016866828	0.0871984419018694	0	-0.133595850638352	-0.148604516983185	4	-0.0487504814299168	0.112588164397373	0.0562940821986864	0.41976770742053	0.701657226275075	-0.0187772070306282	-0.127154624563523	-0.271510187901139	-0.21094589468534	4	-0.157096978545157	0.109573403096434	0.0547867015482172	0.0285228945448089
I3L3Q4	NA	0.0266468400657424	-0.0372729891334822	-0.225881407416328	3	-0.0788358521613559	0.13129445011651	0.075802886117871	0.268958842802666	0.582523987322708	NA	0.100391110896398	-0.145178339106627	-0.0739057889051647	3	-0.0395643390384645	0.126335228966062	0.0729396784516889	0.545368981282233	0.771962728670474	NA	-0.00212943956134715	0.0626556078497676	0.0758028240777623	3	0.0454429974553943	0.0417200778573133	0.024087098181532	0.0738190469342759	0.40934339274324	NA	0.186076051574144	-0.419581424423792	-0.456457426658825	3	-0.229987599836157	0.360793128265859	0.208304009726061	0.244144407302238	0.558116874893284	NA	0.0320968753643372	-0.123885534966663	-0.0394301448285376	3	-0.0437396014769545	0.0780804498297786	0.0450797687276698	0.298537253200482
I3L4C2	NA	NA	NA	NA	0	NA	NA	NA	NA	NA	NA	NA	NA	NA	0	NA	NA	NA	NA	NA	NA	NA	NA	NA	0	NA	NA	NA	NA	NA	NA	NA	NA	NA	0	NA	NA	NA	NA	NA	NA	NA	NA	NA	0	NA	NA	NA	NA
I3L4Y1	-0.174690688152945	-0.0369692592302294	0.107791024274804	-0.104431702144286	4	-0.0520751563131642	0.120500567581213	0.0602502837906067	0.420621265717926	0.713545502954708	-0.0823366265794607	-0.0363942372603994	-0.0370806520522884	-0.0217769423952516	4	-0.04439711457185	0.0262593185348038	0.0131296592674019	0.0148314701297732	0.14809604469456	-0.188171601363088	0.0847064973029538	-0.203990051536405	0	4	-0.0768637888991349	0.142083913228517	0.0710419566142586	0.320830391145807	0.693755559680812	-0.0410272682600549	-0.110586497035771	0.0468666050379743	-0.113210610447991	4	-0.0544894426764606	0.0753864125700649	0.0376932062850325	0.198421375365859	0.508328659094062	-0.103093492964104	0.246987674764777	-0.010095877735507	-0.176570315084325	4	-0.0106930027547894	0.184799730755417	0.0923998653777083	0.911646250067378
J3KMZ7	NA	NA	NA	NA	0	NA	NA	NA	NA	NA	NA	NA	NA	NA	0	NA	NA	NA	NA	NA	NA	NA	NA	NA	0	NA	NA	NA	NA	NA	NA	NA	NA	NA	0	NA	NA	NA	NA	NA	NA	NA	NA	NA	0	NA	NA	NA	NA
J3KMZ8	NA	NA	NA	NA	0	NA	NA	NA	NA	NA	NA	NA	NA	NA	0	NA	NA	NA	NA	NA	NA	NA	NA	NA	0	NA	NA	NA	NA	NA	NA	NA	NA	NA	0	NA	NA	NA	NA	NA	NA	NA	NA	NA	0	NA	NA	NA	NA
J3KN16	0.0399596978727167	0.0341706904475548	0.0288396828799818	0.0375234426462029	4	0.035123378461614	0.00481465603309699	0.00240732801654849	6.50487247092221e-06	0.00204766720316762	-0.0621430537082683	-0.00643199924453228	0.0522891222926124	-0.0144813767047317	4	-0.00769182684122996	0.046940868899942	0.023470434449971	0.754253771927331	0.889972346813553	-0.0931094043914817	-0.00426202685415955	-0.0556797728298875	0.0132271591719856	4	-0.0349560112258858	0.0485627773021476	0.0242813886510738	0.200036351101182	0.589385857094419	-0.0318087382306762	-0.0817146497913695	-0.0119584643080549	-0.0502008129221906	4	-0.0439206663130728	0.0296429113925094	0.0148214556962547	0.0251745054325641	0.196140541037735	-0.177495883362125	0.0177415823872671	0.0878178787914174	0.0297473433940521	4	-0.0105472696973471	0.115428848269195	0.0577144241345976	0.861013366065613
J3KN59	0.0231420798124428	0.0528104205473974	0.327742336668621	0.0245009618526141	4	0.107048949720269	0.147763236528688	0.0738816182643438	0.197529887153994	0.507766027947724	-0.212290590574836	-0.0141884428789668	0.217391740278082	-0.0144813767047317	4	-0.0058921674701133	0.175687805705041	0.0878439028525203	0.948700941859019	0.983204337579555	-0.514199852853322	-0.147753620443692	0.182011784889443	0.00379157916237421	4	-0.119037527311299	0.295914151574534	0.147957075787267	0.451777143808775	0.772904530692658	0.00672586318831336	-0.13306152979159	0.145523657952177	-0.0804620281082788	4	-0.0153185091898445	0.121741877267696	0.0608709386338481	0.809705153377446	0.916915701644896	-0.329945562491251	-0.0081370494383384	0.115941479705805	-0.0725124997843678	4	-0.073663408002038	0.187905636254549	0.0939528181272747	0.462832665775666
J3KN67	-0.0951572330403401	-0.14540133326954	0.0423019426865444	0.022630974499568	4	-0.0439064122809419	0.0908973228809536	0.0454486614404768	0.37131958306462	0.674278299089471	-0.0400323521025198	0.0191257114871856	0.198664532209176	0.0991754050908354	4	0.0692333241711694	0.103438752706473	0.0517193763532363	0.229178524603274	0.528797995346128	-0.0709775028159909	-0.080960916517603	0.0770109008268377	-0.00952277411850655	4	-0.0211125731563157	0.0726426757063052	0.0363213378531526	0.582219111608359	0.842821560383407	0.0893122811677873	0.0283198959693214	0.0664954117869068	0.0269670476002694	4	0.0527736591310712	0.030481279105721	0.0152406395528605	0.0134230396334582	0.140895308374806	-0.101186427199445	-0.136043716399792	0.00201072512114664	-0.041248286267517	4	-0.0691169261864018	0.0614910617216015	0.0307455308608007	0.0656184914919703
J3KNF8	-0.087309371217655	-0.166806696872811	-0.0739198915452189	0.134216609950081	4	-0.0484548374214009	0.128496645998319	0.0642483229991593	0.47928316493359	0.749934268941119	-0.106258687390557	-0.0128928028808943	-0.0456426655557124	0.202964508020628	4	0.00954258804836594	0.134623838281008	0.0673119191405038	0.891904649385646	0.954754870783572	0.0233325038306238	-0.119739244274096	-0.0343061220373204	0.0337707366552442	4	-0.024235531456387	0.0703558125481254	0.0351779062740627	0.516601225119897	0.80707261164726	-0.00450139223494084	-0.0867678775176549	-0.0840642647884744	0.159300160905186	4	-0.00400834340897108	0.115366086455653	0.0576830432278263	0.946858368032102	0.978213946416098	-0.0784961292233498	-0.253007788574532	-0.0849498724197202	0.139751963542952	4	-0.0691754566686626	0.161018322248732	0.0805091611243659	0.423210667875328
J3KNI1	NA	-0.0528232104310665	-0.243239862556819	0.0319567667716614	3	-0.088035435405408	0.140936942599064	0.0813699817483327	0.25248485190977	0.566217883770945	NA	-0.268693049369167	-0.112429756766915	-0.0420320874225182	3	-0.1410516311862	0.116009511201022	0.0669781225204671	0.0533648749394496	0.264896579543442	NA	-0.147753620443692	0.00376191879619908	-0.0680184234286511	3	-0.0706700416920481	0.0757925653830892	0.0437588580264988	0.111450256415142	0.472530329793792	NA	0.0110794458804898	-0.274649820552576	-0.115051957272158	3	-0.126207443981415	0.143190911327796	0.0826713112006109	0.127642118407391	0.416248245895947	NA	-0.425352202022552	-0.132682483203822	-0.19871959235208	3	-0.252251425859485	0.153502879378066	0.0886249287303089	0.019210214382566
J3KNR0	0.0435381082419667	-0.126404342812174	0.141539815629344	-0.0326806987946631	4	0.00649822056611847	0.113733994846248	0.0568669974231242	0.912751301565016	0.970540691041521	0.00957191522181022	-0.113446381316715	-0.062920656987548	-0.102626612153472	4	-0.0673554338089812	0.0556953491126224	0.0278476745563112	0.0519542768611026	0.261084633217592	-0.0505327340189932	-0.0945286814768157	0.0752242813528233	-0.166843584755951	4	-0.0591701797247342	0.101620638379244	0.0508103191896219	0.288413028299733	0.662884805204469	0.0377051678857486	0.0142294363041394	0.0762105666201186	-0.352881023216274	4	-0.0561839631015669	0.199441447309193	0.0997207236545967	0.593568511786832	0.81579625052509	-0.178500895622126	-0.0835126083899468	0.415037499278844	0.0297473433940521	4	0.0456928346652057	0.260529342676064	0.130264671338032	0.737748789310412
J3KP15	0.150283112778715	-0.019339365208438	-0.0185161263458837	-0.0114500207435382	4	0.0252444001202139	0.0834343174664794	0.0417171587332397	0.567257896147414	0.801713074029433	0.110873217485195	-0.0522772788670546	-0.143339339442846	-0.114276971892398	4	-0.0497550931792758	0.113620566784007	0.0568102833920033	0.414814715353476	0.683743121326912	0.131074072470954	-0.138354922441443	0.0149891742194532	-0.00761318410987516	4	2.37850347724611e-05	0.110461351749619	0.0552306758748094	0.999670353048356	0.999670353048356	-0.0761310692159708	-0.0550590177903167	-0.0153934541233759	-0.0894845405727273	4	-0.0590170204255977	0.0323514130124185	0.0161757065062093	0.0107255360709726	0.132053438699863	0.439917862515707	-0.00976998118130398	0.0591351240873325	0.074088979166968	4	0.140842996147176	0.202700369817658	0.101350184908829	0.214001138909584
J3KP36	0.0636498039178172	-0.219513747203655	-0.0530921722000142	-0.062144521495872	4	-0.0677751592454311	0.116253192369155	0.0581265961845777	0.287865233394724	0.604714482688784	0.0148623320079062	-0.135835890475598	0.0474667388357692	0.105885626680388	4	0.00809470176211638	0.103077702892434	0.0515388514462172	0.880349312827378	0.951822593947484	0.127489735121916	0.0190248256817562	0.112286375574368	0.00189703517259759	4	0.0651744928876594	0.0638658681485327	0.0319329340742663	0.0873257699492418	0.434612772123708	0.052948879948959	-0.0766790598940711	0.0517989005802049	0.243623099387573	4	0.0679229550056664	0.131990519235039	0.0659952596175196	0.343071719002324	0.640738228499191	0.0903862364571055	-0.266609054683619	-0.115141901894687	-0.0160004786937151	4	-0.0768412997037289	0.151817205118407	0.0759086025592035	0.350467785473262
J3KPD6	-0.0614539293721327	0.00383695715765636	-0.095052703808123	-0.0404790693550703	4	-0.0482871863444174	0.0413854635202191	0.0206927317601095	0.0583578708855275	0.284083484197987	-0.087996480997829	-0.0456380815040194	-0.0370806520522884	-0.0476059322471102	4	-0.0545802867003118	0.0227411807664364	0.0113705903832182	0.00300035380663534	0.0681960117102154	-0.0682347357524524	-0.0128240403575836	0.0279781562170223	-0.00952277411850655	4	-0.0156508485028801	0.0396404649782505	0.0198202324891253	0.459796587602773	0.779694430710785	0.0111924148702044	-0.0208046151392962	0.0219489728336448	0.0269670476002694	4	0.00982595504120558	0.0214544762738929	0.0107272381369465	0.394999711094329	0.682578847439527	-0.133954456668864	-0.00162374247966401	0.0219653314967916	0.033207045389919	4	-0.0201014555654544	0.0772772984969998	0.0386386492484999	0.621525029815885
J3KPG6	0.112167740207166	0.0435206586301385	-0.0404229795571318	-0.0901978089715783	4	0.00626690257714862	0.0896069480540564	0.0448034740270282	0.893335765664057	0.960644988772471	-0.00427465510032587	0.0640187212314359	-0.0681446640505604	0.00359774510860439	4	-0.00120071320271149	0.0540602796391355	0.0270301398195678	0.966010087278854	0.989143669328664	0.0386804681640595	0.0806878455655607	-0.049819121408645	-0.0581029545635683	4	0.00286155943935174	0.0679015246187404	0.0339507623093702	0.935571277257857	0.985796402916747	0.0289216093025095	-0.00636952487572728	-0.0985638344835895	0.0369511361728915	4	-0.00976515347097893	0.0621176662341142	0.0310588331170571	0.763856571616153	0.896516688647952	0.137988001856314	0.0820113038987667	0.0972534588010288	-0.0303736490435186	4	0.0717197788781478	0.072047275449607	0.0360236377248035	0.09359807530761
J3KQ18	-0.27511755603317	-0.244330067374865	-0.0499144285344295	-0.248283954468472	4	-0.204411501602734	0.103902158677532	0.051951079338766	0.007671260065578	0.0947633974322307	-0.0280143761695966	-0.062963957664302	-0.201467469953171	-0.149803405521539	4	-0.110562302327152	0.0793376249719803	0.0396688124859902	0.0316971358717802	0.211058241718924	-0.0491799959537443	0.0501857571682166	-0.0189581577038844	0.00189703517259759	4	-0.00401384032920364	0.0417765845651029	0.0208882922825514	0.853957482931191	0.961970309214409	-0.0249332921397541	0.163555476566585	-0.403739907944458	-0.392530099869274	4	-0.164411955846725	0.280673410830006	0.140336705415003	0.285788833019011	0.597055730626447	-0.0570810952072676	-0.190560090768101	-0.200427089839656	-0.286562941330035	4	-0.183657804286265	0.0947628285210234	0.0473814142605117	0.00820712899189062
J3KQ48	0.0904210327134575	-0.115957555377058	0.0423019426865444	0.102700173702973	4	0.0298663984314793	0.10064937625009	0.0503246881250452	0.574538801086414	0.805580146421257	0.0482692090932519	-0.0103050083917385	0.128855065676424	-0.0181245479359183	4	0.0371736796105048	0.0679232584359265	0.0339616292179633	0.315684076561878	0.610955802462585	-0.0250451294463276	-0.122053110112342	0.0463333025478348	-0.12691211248222	4	-0.0569192623732636	0.083303600763116	0.041651800381558	0.220759778339977	0.601764481444319	-0.0666862234315218	-0.100330327958716	-0.0519634216214504	-0.00511292339365252	4	-0.0560232241013353	0.0395186020386462	0.0197593010193231	0.0297505853121981	0.214983596741055	0.0368367681803713	-0.127154624563523	-0.0616630198838045	-0.119756244457224	4	-0.067934280181045	0.0757382916159033	0.0378691458079516	0.122983258356262
J3KQN4	-0.0756170466446951	0.0546612162353389	0.0423019426865444	-0.0562034216480868	4	-0.00871432734272464	0.0667090879852117	0.0333545439926059	0.802625916901617	0.923369339333593	-0.0643728764719302	0.119421164766477	-0.0167367891093352	-0.0438876440010001	4	-0.00139403620394709	0.0828729024417304	0.0414364512208652	0.974253299520159	0.989888555198735	0.00781950445929924	0.0378020327123842	0.020570206482753	-0.0660298703351972	4	4.04683298098202e-05	0.0457282150233323	0.0228641075116662	0.998645164993538	0.999670353048356	0.0442579196849145	0.144995066659857	-0.0519634216214504	-0.0188366420128555	4	0.0296132306776164	0.0866594394835302	0.0433297197417651	0.51983460251862	0.772595871884852	0.0506260730699679	0.264656322857784	-0.0637645425290922	-0.041248286267517	4	0.0525673917827857	0.149799848455265	0.0748999242276326	0.509076920993151
J3KR44	0.0565835283663674	0.0693827219421045	-0.0934160671710161	0	4	0.00813754578436396	0.0741110445808905	0.0370555222904452	0.833459991775971	0.934204506910923	-0.0225845803702927	0.0553982386590909	0.0458556889297838	-0.0163018123291005	4	0.0155918837223704	0.0407230240258196	0.0203615120129098	0.47286154259139	0.728201957847057	0.0297473433940519	0.0481291708742791	0.0859109601500705	-0.0720037713798301	4	0.0229459257596429	0.0674796158332447	0.0337398079166224	0.521812256937372	0.810021737186404	0.0222986671087744	-0.0683252725641902	0.0252962946157558	-0.0608089124881715	4	-0.0203848058319579	0.0511241578572972	0.0255620789286486	0.455573986027532	0.727121753089131	-0.0441998039105352	0.0557094325862876	-0.117322847194213	-0.054039839712889	4	-0.0399632645578374	0.0715398915251448	0.0357699457625724	0.306625952728
J3KR55	0.21518288757181	0.0285314844106853	0.0541638392398485	-0.096280861023422	4	0.0503993375497306	0.128011813888699	0.0640059069443494	0.461001595268378	0.742118765610475	-0.0477326107841018	-0.0141884428789668	0.0538930079952021	0.0495698590870401	4	0.0103854533547934	0.0496987951521893	0.0248493975760947	0.690538713722458	0.850651398363077	-0.0157673158583166	0.0148187147115452	0.0279781562170223	-0.0800076478916501	4	-0.0132445232053498	0.048133612378421	0.0240668061892105	0.601968147872075	0.847091500148405	-0.0666862234315218	-0.0766790598940711	0.0922585078519886	-0.0102440314968031	4	-0.0153377017426018	0.0774646644072859	0.0387323322036429	0.705808644696649	0.872776320339919	0.153246260295682	0.0942246681913393	0.165222382477024	0.0588936890535686	4	0.117896750004403	0.0501033333079384	0.0250516666539692	0.00330505581346084
J3KR97	0.0671700050320953	0.0730397455501935	-0.095052703808123	-0.0424352663203967	4	0.000680445113442282	0.0830271648573663	0.0415135824286832	0.987453983707241	0.994692899949013	-0.124755031007947	0.0380011884245561	-0.0594484650807429	-0.219393677706612	4	-0.0913989963426865	0.108413571985184	0.0542067859925919	0.142748675554652	0.430558867898435	-0.030373649043519	0.114494789706869	-0.111558764685441	-0.0345802317101446	4	-0.015504463933059	0.0943596174608993	0.0471798087304497	0.753605800050584	0.924665949608486	-0.0737640546720546	0.134901207107281	-0.11137161078421	-0.624632646151177	4	-0.16871677612504	0.322669928142804	0.161334964071402	0.33596308636208	0.636459254653907	-0.523228859882626	0.169744675832317	0.0436012454442463	0.107294013171909	4	-0.0506472313585386	0.319235649887443	0.159617824943721	0.761764939645897
J3KRX5	-0.0899205846741929	-0.107654251645849	-0.0372729891334822	-0.0701042384643486	4	-0.0762380159794681	0.0301666984893653	0.0150833492446826	0.00232339046276976	0.0484386853031241	-0.0565835283663675	-0.00385575741549948	-0.0525290511409523	-0.106499621300679	4	-0.0548669895558745	0.0419383950054271	0.0209691975027136	0.0397695773639015	0.234811391349755	-0.0157673158583166	0.00848646588782864	0.0316679153660836	-0.0306967972229165	4	-0.00157743295683021	0.0274215571955491	0.0137107785977745	0.912158742696013	0.982895432930287	-0.0249332921397541	0.0189415636534602	-0.00170229523100057	-0.00170229523100057	4	-0.00234907973707376	0.0179273980843741	0.00896369904218707	0.802035685525981	0.913198965256539	-0.0405404613249394	-0.0512057713302244	-0.11078987735498	-0.160672688204116	4	-0.0908021995535649	0.0559032256253876	0.0279516128126938	0.0174981437871926
J3KS15	-0.0335381147766745	-0.217278742820347	0.0197945432769748	0.00569111207785572	4	-0.0563328005605477	0.109644170309556	0.054822085154778	0.343788539979037	0.650079328790908	0.0909736600474902	-0.0710312389324169	-0.0133738620833715	-0.0457455902215825	4	-0.00979425779747015	0.0712026520930299	0.035601326046515	0.792460463483785	0.909082581075108	-0.0545985752470646	-0.0497903667115313	-0.0227798686562928	-0.22112745409987	4	-0.0870740661786897	0.0904595423479524	0.0452297711739762	0.102531461292982	0.461238999239116	-0.0690416444296514	-0.0386459278994835	0.0616131904071607	-0.0102440314968031	4	-0.0140796033546943	0.0558821405570597	0.0279410702785299	0.632292654612378	0.829770097011869	0.293216798245835	-0.161228558658052	0	-0.0614005446641432	4	0.0176469237309099	0.195358738493135	0.0976793692465673	0.862580918279111
J3KS22	0.0339758857237144	0.210543269300128	0.00916970273984824	0.0559254145979923	4	0.0774035680904208	0.0907915471323884	0.0453957735661942	0.139060269151264	0.440248840144669	0.0441354095862386	0.0871608010438787	0.136444220688107	-0.00360673948073331	4	0.0660334229593727	0.0598144958904799	0.0299072479452399	0.069339666892609	0.296064707650222	0.0297473433940519	0.164714145194604	0.0112564553431234	0.0485298939276587	4	0.0635619594648595	0.0691303640321783	0.0345651820160892	0.115553960082613	0.478520029218819	0.128897733182257	0.0391847835608438	0.156250064545236	-0.0171140208638476	4	0.0768046401061223	0.0801274698952223	0.0400637349476111	0.103687739969096	0.381698589251834	0.148445274031861	0.287439718502072	0.0745035255105366	0.0123232784501301	4	0.13067794912365	0.118396683669139	0.0591983418345693	0.069385598050956
J3KSI8	0.152494140094069	0.595807484664006	0.333837381817467	0.417885861587874	4	0.375006217040854	0.184208542220759	0.0921042711103797	0.00656440956385484	0.0878062394315628	0.00745030448520684	0.190879134868756	0.160464672193246	0.302708799175967	4	0.165375727680794	0.121758441270685	0.0608792206353425	0.0348062146982031	0.216946777386944	-0.0478285250906152	0.218740026877115	0.166992267664503	0.191695624113531	4	0.132399848391134	0.121996608584793	0.0609983042923963	0.073006578705111	0.406766571407496	0.0572748053517491	0.17767197902728	0.147060893090575	0.481532911065751	4	0.215885147133839	0.184321276727718	0.0921606383638589	0.0576474954581141	0.287270908616381	-0.0719447943934395	0.442365130495309	0.27405887451993	0.555190601442728	4	0.299917453016132	0.27349949314833	0.136749746574165	0.0707635509257357
J3KT75	-0.126982678895738	-0.441533427279565	0.488271301517279	-0.327164743253509	4	-0.101852386977883	0.414337369111179	0.207168684555589	0.640440313990848	0.848740906659556	-0.214765196740542	-0.425342507670583	0.050683451519312	-0.0853255981962689	4	-0.16868746277202	0.202540340131802	0.101270170065901	0.146821600324399	0.435565944828909	-0.224353937669734	-0.185972942674182	0.355437357077613	-0.485047220526586	4	-0.134984185948222	0.352913692885044	0.176456846442522	0.473294031970712	0.787568991782575	-0.169082551759461	-0.102034634170965	0.0534392589614605	-0.228074567479994	4	-0.11143812361224	0.121380829118608	0.0606904145593041	0.115991626585748	0.401652562621669	-0.506726228970698	-1.15218341905505	-0.0182237586189073	-0.343750414643548	4	-0.50522095532205	0.476725532646739	0.23836276632337	0.0783325123698786
J3KTA4	-0.0474285025601142	-0.0769356665478741	-0.134899518616037	-0.080116041592415	4	-0.0848449323291101	0.0364708546550595	0.0182354273275298	0.00349365519742298	0.0571943472920629	0	-0.0103050083917385	-0.105252154693868	-0.0949116470254669	4	-0.0526172025277682	0.0551306025100087	0.0275653012550043	0.104879349818701	0.368234929735113	0.0207585601667974	-0.00639777119815066	-0.0674729859725198	0.0811960828479809	4	0.00702097146102696	0.0616984085191297	0.0308492042595648	0.827522061344185	0.950094641642033	-0.0549664592179286	-0.040278859642449	-0.0967433988592206	-0.0484403550577532	4	-0.0601072681943379	0.0251523135772406	0.0125761567886203	0.00306452693303565	0.0647836707592081	-0.0983305469381429	-0.136043716399792	-0.163901213814542	-0.0577154978562872	4	-0.113997743752191	0.0461502383285283	0.0230751191642641	0.00260317797640061
J3KTG7	NA	NA	NA	NA	0	NA	NA	NA	NA	NA	NA	NA	NA	NA	0	NA	NA	NA	NA	NA	NA	NA	NA	NA	0	NA	NA	NA	NA	NA	NA	NA	NA	NA	0	NA	NA	NA	NA	NA	NA	NA	NA	NA	0	NA	NA	NA	NA
J3KTL2	-0.0834013912906522	0.0839555230293771	-0.0868880241735184	-0.212604978990654	4	-0.0747347178563618	0.121673902351692	0.0608369511758458	0.265276141589627	0.580024607760842	-0.0444274660604299	-0.0193826700592163	-0.114229750813125	-0.240516969272366	4	-0.104639214051284	0.0990772016306578	0.0495386008153289	0.0791234773337386	0.318935917197895	-0.111344975840548	0.0378020327123842	0.0445082611395082	-0.114528388026387	4	-0.0358907675037606	0.0890165631173392	0.0445082815586696	0.450792218396425	0.772904530692658	0	-0.0633361204765149	-0.156167811059654	-0.284976958714471	4	-0.12612022256266	0.123809631032632	0.0619048155163158	0.0877689215689127	0.354239585985078	0.0351038009559158	0.162513106601241	0	-0.146904532876426	4	0.0126780936701828	0.127254066342285	0.0636270331711426	0.848643153886224
J3QLR8	0.00612610279684139	0.0929893348944384	0.25123210421643	0.0522637500920201	4	0.100652822999932	0.106473239503111	0.0532366197515557	0.1075523123243	0.391252274556387	-0.334790245824412	0.107556829473403	0.0618857987487328	0.0425918767244679	4	-0.0306889352194522	0.204556151488702	0.102278075744351	0.774260059697933	0.899822925269446	0.0588936890535683	0.0274004372519144	0.0279781562170223	0.0226014289371326	4	0.0342184278649094	0.0166257748195867	0.00831288740979337	0.00624200954503473	0.133826913862695	-0.0456587169917007	-0.0435502783705014	-0.177173669179956	0.0101718050572912	4	-0.0640527148712167	0.0797168295129597	0.0398584147564798	0.159176865899154	0.458277776774421	-0.247483402299278	0.127287876589422	0.132556193556702	0.0791187171176026	4	0.0228698462411121	0.181832371815801	0.0909161859079005	0.809784006492064
J3QQ67	-0.0743237296231744	-0.115957555377058	-0.00153396616353704	-0.00762324120302504	4	-0.0498596230916987	0.0550354741155424	0.0275177370577712	0.119957442539418	0.411328927848433	0.0306181679758665	-0.0616237856767188	-0.107043210219856	-0.0701191855741797	4	-0.0520420033737219	0.0585275768348707	0.0292637884174353	0.125658896118417	0.406709681976417	0.0155968550510185	-0.00853668195448543	-0.0343061220373204	-0.0114348950622836	4	-0.00967021100076772	0.0204103873669104	0.0102051936834552	0.379929097919869	0.725152157041746	0.0134205157623216	-0.00636952487572728	-0.066142356791212	-0.064362350345926	4	-0.0308634290626359	0.0405290002360429	0.0202645001180215	0.178581917636111	0.484607842920973	-0.00444864688261037	-0.163044411686812	-0.179767619273563	-0.0430687218918858	4	-0.0975823499337179	0.0869584619453908	0.0434792309726954	0.0659519777265959
J3QQJ5	NA	NA	NA	NA	0	NA	NA	NA	NA	NA	NA	NA	NA	NA	0	NA	NA	NA	NA	NA	NA	NA	NA	NA	0	NA	NA	NA	NA	NA	NA	NA	NA	NA	0	NA	NA	NA	NA	NA	NA	NA	NA	NA	0	NA	NA	NA	NA
J3QR07	NA	NA	NA	NA	0	NA	NA	NA	NA	NA	NA	NA	NA	NA	0	NA	NA	NA	NA	NA	NA	NA	NA	NA	0	NA	NA	NA	NA	NA	NA	NA	NA	NA	0	NA	NA	NA	NA	NA	NA	NA	NA	NA	0	NA	NA	NA	NA
J9JIE6	0.0195126564117519	0	-0.00922835795353759	-0.0701042384643486	4	-0.0149549850015336	0.0386691276336545	0.0193345638168272	0.468604585110039	0.743501014891899	0.0748539946842133	-0.0311385118089042	0.00664072537702959	-0.0949116470254669	4	-0.0111388596932821	0.0710134978517252	0.0355067489258626	0.764360648751506	0.896305548244819	0.178033304829788	0.0460696486959847	-0.0227798686562928	-0.0133495536590197	4	0.0469933828026151	0.092523674537112	0.046261837268556	0.348916229028737	0.712622467230216	0.173416399960902	0.0314325078366572	0.0101718050572912	-0.0608089124881715	4	0.0385529500916698	0.098178612635909	0.0490893063179545	0.462116668883386	0.732169124756014	0.159622823343346	-0.0478467592403097	0.0821267667135617	0.0262793247988489	4	0.0550455389038618	0.0877194798049293	0.0438597399024647	0.256134090122558
K4DIA7	NA	NA	NA	NA	0	NA	NA	NA	NA	NA	NA	NA	NA	NA	0	NA	NA	NA	NA	NA	NA	NA	NA	NA	0	NA	NA	NA	NA	NA	NA	NA	NA	NA	0	NA	NA	NA	NA	NA	NA	NA	NA	NA	0	NA	NA	NA	NA
K7EIE8	0.163498732282879	-0.118040869877547	0.350767777767344	0.285353479988208	4	0.170394780040221	0.207358466285607	0.103679233142803	0.151388821815992	0.45395122975912	0.129526900816883	0.319872973398973	0.220251394417322	0.0771490987608364	4	0.186700091848504	0.10666286474019	0.0533314323700948	0.0128146232672917	0.136885534053084	0.234661258669712	0.00424947300135792	0.321174532561068	-0.0600806040040108	4	0.125001165057032	0.181975784673025	0.0909878923365123	0.218613067169742	0.599698096237869	0.280900826627308	0.12764782309596	0.119136891528136	0.0664954117869068	4	0.148545238259578	0.0922889097966464	0.0461444548983232	0.0181569394981734	0.164336611086761	0.237039197300849	-0.137828126077975	0.477066696635356	0.185555653156077	4	0.190458355253577	0.25305478096541	0.126527390482705	0.182960883352356
K7EIG1	0.00856927872517024	0.0285314844106853	-0.0294279722991986	-0.0424352663203967	4	-0.00869061887093494	0.0329248037019348	0.0164624018509674	0.616508572149728	0.834228760776021	-0.0411298759598548	-0.0900322008624727	-0.0716378740886569	-0.227805917522812	4	-0.107651467108449	0.0826027268891292	0.0413013634445646	0.0403098932847701	0.236611917080249	0.0763508861301146	-0.00426202685415955	0.0187122602621706	-0.0133495536590197	4	0.0193628914697765	0.0403166453981983	0.0201583226990991	0.373876375167907	0.723320526725183	0.0486099442246216	-0.0435502783705014	-0.0309529283289121	0.0319677286586358	4	0.00151861654596099	0.045571731320126	0.022785865660063	0.949027802613706	0.979108825898956	0.122566642206255	0.10784223690641	0.242091145861294	0.193307928880263	4	0.166451988463556	0.0627257264106181	0.031362863205309	0.00181709742756758
K7EII0	-0.320394128723825	NA	-0.268872174586557	-0.408084738637077	3	-0.33245034731582	0.0703850041019639	0.0406368010651818	0.000190343154061147	0.0113007966452166	0.15466833536488	NA	-0.276072405957579	-0.400105726153028	3	-0.173836598915242	0.291174664101235	0.168109770700047	0.271373670830908	0.573680144700585	-0.17041513055893	NA	-0.836366744425411	-0.338634427619762	3	-0.448472100868035	0.346296294885302	0.199934259071399	0.0437669055115171	0.329122774530637	-1.0226487389452	NA	-0.15049162652745	-0.280837228353547	3	-0.484659197942066	0.470448778987069	0.271613729188115	0.0861060775061064	0.349948863640432	0.737143255029787	NA	-1.03461819686958	-1.47766848754925	3	-0.591714476463012	1.17195159581315	0.676626569319931	0.343789968945394
K7EIN2	-0.0310268956206247	0.017186510816676	0.0877333719335504	-0.150103560529568	4	-0.0190526433499917	0.100057075321874	0.0500285376609369	0.716444669457624	0.886481074288514	-0.0488360104867513	0.239526335149267	0.0426281818993879	-0.163859000742959	4	0.0173648764547363	0.170507672779141	0.0852538363895707	0.845332725534306	0.932642638427084	-0.306008091656946	0.00212630110838796	0.0463333025478348	-0.3750987539087	4	-0.158161810477356	0.213253128348197	0.106626564174099	0.18851277977782	0.574951498610508	-0.109683628926997	-0.0353855987358967	0.0745959105580238	-0.268488835925902	4	-0.0847405382576931	0.14400186184503	0.0720009309225152	0.283791102548486	0.596000359384086	-0.281631624711124	-0.0179624792944118	-0.271510187901139	-0.400962314067121	4	-0.243016651493449	0.161140942990547	0.0805704714952735	0.023511907026245
K7EIR0	NA	0.0247597305214769	0.055639742223697	0.0375234426462029	3	0.0393076384637923	0.0155171291390818	0.00895881868549905	0.00334228010765813	0.0561317375858363	NA	0.0919858725678594	0.00166304922264432	0.0460850867625645	3	0.0465780028510227	0.0451634291099051	0.0260751179541303	0.0858548142727622	0.334889165866529	NA	-0.181139788938239	0.0316679153660836	-0.0423786022705518	3	-0.0639501586142357	0.108031378706076	0.0623719455768792	0.274968638774672	0.65606171666601	NA	-0.040278859642449	-0.0985638344835895	0.079434467494405	3	-0.0198027422105445	0.0907485670166542	0.0523937095956381	0.67037093359512	0.855076511501286	NA	0.0494504421146053	0.00401865173739308	0.033207045389919	3	0.0288920464139725	0.0230212142673134	0.0132913042543054	0.0483584235397993
K7EJQ7	0.228867802682602	-0.113877244936011	-0.0674792779873897	0.159964379147733	4	0.0518689147267335	0.168056554283651	0.0840282771418255	0.559731589536676	0.797769257505598	0.543832624761301	0.109937514899584	-0.147019685930794	0.0232265518575367	4	0.132494251396907	0.294264923205001	0.147132461602501	0.402544681644782	0.675540999532168	0.362134417282382	0.0232187095679472	-0.123819702852422	0.270922315264107	4	0.133113934815504	0.223258733169024	0.111629366584512	0.278095961168593	0.656130951730518	-0.100017294333518	-0.0534092805712239	-0.0554951125917036	-0.0309529283289121	4	-0.0599686539563393	0.0289185285546202	0.0144592642773101	0.00602842632507908	0.0944245221798656	0.615434852945426	0.245619542807445	0.061065151185732	0.141355849245542	4	0.265868849046036	0.244986031752768	0.122493015876384	0.0730134221153779
K7EJX0	NA	NA	NA	NA	0	NA	NA	NA	NA	NA	NA	NA	NA	NA	0	NA	NA	NA	NA	NA	NA	NA	NA	NA	0	NA	NA	NA	NA	NA	NA	NA	NA	NA	0	NA	NA	NA	NA	NA	NA	NA	NA	NA	0	NA	NA	NA	NA
K7EK35	0.194945415991624	0.254685824543332	NA	-0.246027980528104	3	0.0678677533356176	0.273477838054319	0.157892503418058	0.629315885621226	0.841717029155046	0.028527305231796	0.124139713669007	NA	-0.335045650749182	3	-0.0607928772827931	0.242273339386107	0.139876577712038	0.625602708259941	0.816226580522141	-0.145628451440909	0.283108845996834	NA	-0.14359085362885	3	-0.00203681969097485	0.2469454918532	0.142574046196609	0.987037116450654	0.998439756181397	0.155369944543448	0.204118648956026	NA	-0.139205818980935	3	0.0734275915061798	0.185752078015329	0.107244012244682	0.450385028914993	0.722288563612745	0.12907994916493	0.215187646593484	NA	-0.303918880463804	3	0.01344957176487	0.278200799318819	0.160619306375489	0.924167264104754
K7EK60	0.031575394253272	0.0076637366981695	0.153994814202272	0.109763566225542	4	0.0757493778448139	0.067986049251946	0.033993024625973	0.0674159998468224	0.304176966473051	0.0748539946842133	0.0454827697940081	0.108934371553164	0.0107664308690703	4	0.0600093917251139	0.0418326340982235	0.0209163170491117	0.0284634612838382	0.199356773297071	0.14650411304056	0.0169233030364685	-0.0537235758645611	-0.122772382121296	4	-0.00326713547720697	0.11498758924622	0.0574937946231101	0.956529039333794	0.992649257090992	0.093530690725586	-0.141799866869289	0.0938535274073686	-0.142957953842043	4	-0.0243434006445945	0.136296550342124	0.0681482751710622	0.733161041202312	0.887711359096248	0.0693737030406619	-0.0904072214683554	0.179506608483272	-0.150824902247769	4	0.00191204695195234	0.1504906711397	0.07524533556985	0.980551321697308
K7EKE6	-0.0235193589516834	-0.00770466472503467	0.0106923361697224	-0.00380658542973467	4	-0.0060845682341826	0.0140623654605457	0.00703118273027287	0.420085844176734	0.713476353111187	-0.0150170356407234	0.0165902186713217	-0.00333186069774802	-0.0144813767047317	4	-0.00406001359297036	0.0147831372456385	0.00739156862281925	0.602642886235595	0.802215488224194	0.00391505000338302	-0.00853668195448543	-0.03623614913572	-0.0482551686072211	4	-0.0222782374235109	0.0241146076478223	0.0120573038239111	0.114154002744554	0.476826970330922	0.0111924148702044	0	-0.00511292339365252	-0.0171140208638476	4	-0.00275863234682393	0.0117453769158276	0.00587268845791381	0.655127462681321	0.844541714151656	-0.00177781296790325	-0.0596376775114798	-0.0806878455655607	-0.0430687218918858	4	-0.0462930144842074	0.033431939145994	0.016715969572997	0.0324486873973102
K7EL66	-0.181636753765808	NA	0.10208866491062	0	3	-0.0265160296183959	0.143709266127211	0.0829705834835886	0.718175351551677	0.886777595005761	0.0657069014370603	NA	-0.0302674396687965	0.158472588774608	3	0.0646373501809571	0.0943745598088877	0.0544871775103138	0.215424384605007	0.513992039984954	-0.139857663582961	NA	0.0279781562170223	0.0829893646710316	3	-0.00963004756496898	0.116086098410575	0.067022340166519	0.870379864333972	0.964965491807101	-0.0456587169917007	NA	0.0567143909943214	0.00170028898983932	3	0.00425198766415337	0.0512342335189354	0.0295800985138815	0.870325716021986	0.943197764390286	-0.482941563780648	NA	0.179506608483272	0.112209503586025	3	-0.0637418172371169	0.364593672063172	0.210498254710507	0.732195983099699
K7EL95	NA	0.275467386679835	0.152616223518405	-0.120872849205814	3	0.102403586997475	0.202885133253426	0.117135786298438	0.343928918779176	0.650079328790908	NA	0.216512861325505	0.0887347572075031	-0.0929893348944384	3	0.0707527612128564	0.155532686279141	0.0897968382910476	0.38956231007052	0.665713320148775	NA	0.189183140788503	-0.0873451326841347	-0.0133495536590197	3	0.029496151481783	0.143156513453629	0.0826514515787009	0.687451375344317	0.896638112644841	NA	0.0743183206898335	0.108129900494871	-0.154273267069877	3	0.00939165137160899	0.142742635111489	0.082412498806455	0.896971720670194	0.957804843371952	NA	0.75374505911809	0.216343376663643	-0.096886095136965	3	0.291067446881589	0.430210535842364	0.248382168676802	0.220225910201484
K7ELL7	0.0471076648033199	-0.0688533202500154	0.00153233688424644	0.0338147129922438	4	0.00340034860744866	0.0518312813564005	0.0259156406782003	0.899899433070469	0.963058661043795	0.0748539946842133	-0.00901284973761138	0.082462160191973	0.0754407562984749	4	0.0559360153592625	0.0434369899889595	0.0217184949944798	0.0420228721597949	0.240034005574987	-0.0263754154242975	-0.0301020317894192	0.0390192435825293	0.0263341478134625	4	0.00221898604556878	0.035581305818214	0.017790652909107	0.904813094186085	0.980095661755836	0.0156451808768354	-0.0127672960738779	0.0583491730852669	0.0550777543572145	4	0.0290762030613597	0.0339816529939974	0.0169908264969987	0.137873702230223	0.428798561565807	0.029892374310574	-0.118319967188761	-0.0849498724197202	0.038381091727856	4	-0.0337490933925129	0.0796382497810268	0.0398191248905134	0.429190198262154
K7EMM8	-0.155417757857815	-0.24660740808593	-0.289336277146273	-0.428404723016673	4	-0.279941541526673	0.113646989206268	0.0568234946031339	0.00263945804722859	0.0499444970615628	0.0169730786037136	-0.17732427865864	-0.121452269231363	-0.28590887208638	4	-0.141928085343168	0.126032001758203	0.0630160008791014	0.0652387310266542	0.288091473583149	0.0960466874710343	-0.133678435231969	-0.0170510919392254	-0.0740005814437769	4	-0.0321708552859844	0.097846581086986	0.048923290543493	0.535207205599804	0.817963287425787	-0.375144772155331	-0.115742053591564	-0.0119584643080549	-0.337751498363016	4	-0.210149197104491	0.174831502105587	0.0874157510527935	0.0530038134237045	0.273898338427109	0.51208362080406	-0.0698214494975714	-0.209704903427667	-0.345995854849192	4	-0.0283596467425926	0.377525658883698	0.188762829441849	0.885498980686564
K7EMQ3	NA	NA	NA	NA	0	NA	NA	NA	NA	NA	NA	NA	NA	NA	0	NA	NA	NA	NA	NA	NA	NA	NA	NA	0	NA	NA	NA	NA	NA	NA	NA	NA	NA	0	NA	NA	NA	NA	NA	NA	NA	NA	NA	0	NA	NA	NA	NA
K7ENL9	0.132471836662255	0.723455307759966	0.391075766420881	-0.0019020372443746	4	0.311275218399682	0.319536746088781	0.15976837304439	0.0992940030912097	0.372414108368147	0.0116904105230251	0.353413713602125	0.22167909868118	-0.00360673948073331	4	0.145794120831399	0.172403448675891	0.0862017243379453	0.141728853387387	0.430558867898435	0.196397212803503	0.279607157285282	0.375901459637329	0.0466932354480415	4	0.224649766293539	0.139480133846192	0.0697400669230961	0.0181088177181371	0.235961017077278	0.052948879948959	0.661291546532136	0.0922585078519886	-0.00170229523100057	4	0.201199159775521	0.309138704524544	0.154569352262272	0.240767571627452	0.556027783827188	-0.24432306140595	0.556003816965663	0.141704575770887	-0.0762355858270852	4	0.0942874363758787	0.346008464021054	0.173004232010527	0.605402897330716
K7ENR6	0.0459187936681482	NA	-0.0341298614395021	-0.0191341669567153	3	-0.00244841157602306	0.0425529977863383	0.024567984726768	0.909822169631302	0.968789157729985	-0.0225845803702927	NA	-0.0184211968206881	-0.100693999619473	3	-0.0472332589368179	0.0463451349809109	0.0267573761568585	0.0886366817206227	0.340036407159191	0.080064388929179	NA	0.0463333025478348	-0.0640440544113535	3	0.0207845456885534	0.0753748306352915	0.043517678757408	0.592796277586408	0.84370204667783	0.133002131514994	NA	0.0534392589614605	-0.0697089718114043	3	0.0389108062216834	0.102133514613032	0.0589668121551165	0.466018566009364	0.735268332487635	-0.107872215587352	NA	-0.106450941630642	-0.054039839712889	3	-0.0894543323102946	0.0306780820678832	0.0177119989401138	0.00179668263139347
K7EQY5	0.155804340492879	0.218820371986327	0.153994814202272	-0.0210616155278296	4	0.126889477788412	0.103136776287326	0.0515683881436632	0.0490791077075878	0.264467277361922	0.0829363409820719	0.103978419104153	0.0666603040690801	-0.0254386069012237	4	0.0570341143135202	0.0570646019070776	0.0285323009535388	0.0925632628576035	0.348793301642268	0.0117134205637903	0.187315574131736	0.0149891742194532	0.0393231298110315	4	0.0633353246815029	0.0835660597082274	0.0417830298541137	0.180349285126032	0.569098005152396	0.101930685581988	0.102709921346058	0.0135465318379478	-0.252187023596801	4	-0.00849997120770192	0.167761733776857	0.0838808668884283	0.922586948315895	0.969742818066394	0.0506260730699679	0.0572699465739046	0.147165888441053	0.031478231473168	4	0.0716350348895234	0.0515273744007122	0.0257636872003561	0.0319773616572755
K7ER00	-0.0423619651636805	-0.0251920914538757	-0.0263018713124791	0.022630974499568	4	-0.0178062383576168	0.0280765531353985	0.0140382765676992	0.251642769445793	0.566217883770945	0.0420640595665438	0.0127786047213025	-0.0150543457222894	-0.00541349618636433	4	0.00859370559479813	0.0251211067200921	0.0125605533600461	0.519397328197806	0.758154574187333	0.0713846332367652	0	-0.0420417708169257	0.0207314415840865	4	0.0125185760009815	0.0471388376520373	0.0235694188260186	0.614401849200312	0.856705161500251	-0.0526338879080386	-0.0256485873706103	0.0135465318379478	-0.0205613224823165	4	-0.0213243164807544	0.0271756435311515	0.0135878217655758	0.167612954678637	0.470048054427558	0.155640775436065	0.0415883243416349	-0.159399821579601	-0.0142138592197007	4	0.00590385474459932	0.130925620882023	0.0654628104410114	0.931074404456747
K7ER96	0.081165539600123	-0.0548172605631541	-0.0107721730188747	-0.0404790693550703	4	-0.00622574083424402	0.0610800901709887	0.0305400450854943	0.845205252368872	0.940792054086677	0.0707957781098599	0.00640345055207461	-0.00500068105836646	-0.0327899351176695	4	0.00985215312147465	0.0438367172915808	0.0219183586457904	0.668857256855766	0.839613202748928	0.0143035380294979	-0.0106787685260268	-0.00377175388920842	-0.0133495536590197	4	-0.00337413451118925	0.0124569240838334	0.00622846204191669	0.607520167098544	0.852615350575162	0.0333200732000265	-0.0224174661075973	-0.0119584643080549	-0.0396701454300211	4	-0.0101815006614117	0.0311707317255206	0.0155853658627603	0.537793784428375	0.782865800732872	0.0903862364571055	-0.0886804767488873	-0.0913666140915875	-0.108275851985764	4	-0.0494841765922833	0.093649492006148	0.046824746003074	0.331286323823511
K7ERN2	0.0671700050320953	-0.166806696872811	0.0303417080452137	-0.0114500207435382	4	-0.02018625113476	0.102888397435045	0.0514441987175227	0.708329131673767	0.880089484855101	0.199962678105117	0.0329918256108112	0.0871691628695006	0.082262022154489	4	0.100596422184979	0.0706174572626944	0.0353087286313472	0.0292178958746931	0.200740225520903	0.137028249477513	-0.117429083586895	0.129605851774394	-0.210106048008618	4	-0.0152252575859014	0.175671402697069	0.0878357013485345	0.868085768807759	0.964965491807101	-0.0714009173035737	-0.112302969624792	0.142444265020205	-0.0396701454300211	4	-0.0202324418345454	0.112452553318531	0.0562262766592656	0.731293711178981	0.886763292777401	0.253527320089418	-0.0955998906886779	0.188362959443779	0.107294013171909	4	0.113396100504107	0.151628216861959	0.0758141084309795	0.185360347773278
K7ERP4	-0.060173241280141	0.0965870800030428	-0.0739198915452189	-0.0922226444490686	4	-0.0324321743178465	0.0870089378186245	0.0435044689093123	0.484144840416213	0.752897232969487	-0.117791083258183	0.109937514899584	0.0132510234978562	-0.139846878489116	4	-0.0336123558374645	0.11715313861857	0.0585765693092848	0.586939798291452	0.79637298484518	0.0104166159453384	0.116458976587383	0.0572353320655147	-0.0961498587115326	4	0.0219902664716758	0.0899214294156282	0.0449607147078141	0.642134971062404	0.872437760683887	0.120653739087349	0.0848435005525442	0.0402638702137272	-0.0102440314968031	4	0.0588792695892043	0.0566121018223436	0.0283060509111718	0.0827239407352585	0.341165720112805	-0.0831939355263989	0.119839770006003	0.0953712732230524	-0.135206941432899	4	-0.000797458432560648	0.127353647234098	0.063676823617049	0.990413963769887
M0QWZ7	-0.100412958491835	0.0247597305214769	-0.0154135551697429	-0.0641303374197157	4	-0.0387992801399542	0.0548469014366412	0.0274234507183206	0.206861371140857	0.518685253063227	-0.0845979045359642	0.0404993622797525	-0.0473611827820118	-0.0438876440010001	4	-0.0338368422598059	0.0528724350077696	0.0264362175038848	0.247823492658817	0.5476391946693	0.00391505000338302	0.0826985706867073	-0.00377175388920842	-0.0840262996290432	4	-0.000296108207040312	0.0681387693035879	0.0340693846517939	0.993347185365672	0.998695086034424	-0.00675736617530875	0.0314325078366572	-0.00853163362111692	-0.152381207728669	4	-0.0340594249221093	0.0810068064702429	0.0405034032351215	0.432630479569301	0.706178153206261	-0.0205783246689194	0.11235301194398	-0.0637645425290922	-0.115919287299567	4	-0.0219772856383996	0.0976692726414343	0.0488346363207171	0.668488108302396
M0QXN5	0.062474492210543	0.180346224171691	0.194751621815671	0.576702167416416	4	0.25356862640358	0.223422778358119	0.111711389179059	0.0636804129180502	0.296162905001947	-0.0345572220363686	-0.00128410782032506	0.11047653636157	0.451056722079826	4	0.131422982146175	0.22193473605457	0.110967368027285	0.281063608946972	0.582878079893244	-0.453888428250202	-0.00639777119815066	-0.210513175117739	0.1323170770346	4	-0.134620574382873	0.25520478467313	0.127602392336565	0.332043030472053	0.701103074767955	-0.136604928242286	-0.127843820520571	-0.034433497063874	0.157775918776196	4	-0.0352765817626337	0.136755385326835	0.0683776926634176	0.624371710818731	0.827840211317993	-0.259130911766322	0.12580132824472	0.300440318946561	0.577873075934837	4	0.186245952839949	0.350440799072178	0.175220399536089	0.32871341148887
M0QZM1	-0.137749109764808	0.116215886751975	-0.380199075777419	-0.329551336090388	4	-0.18282090872016	0.225049943534354	0.112524971767177	0.155349104510937	0.459061918804069	-0.228451927636702	-0.00772184737773601	-0.240251930378622	-0.066342494828696	4	-0.135692050055439	0.116508793724778	0.0582543968623891	0.0586968179760561	0.27382790237904	0.105794664022597	0.29876211030832	-0.0576386258679443	0.0667690122127011	4	0.103421790168918	0.147701675626203	0.0738508378131015	0.210923440823134	0.593523125398717	0.361820822010875	0.0818441334828353	-0.0590354702969522	-0.173331602885562	4	0.0528244705777991	0.230925747063815	0.115462873531907	0.6634090697606	0.84992656838981	0.179369847226761	0.252447265162566	-0.21203370948764	-0.125530882083859	4	0.0235631302044572	0.226861613969047	0.113430806984523	0.842310224611285
M0QZR8	0.0195126564117519	0.119756244457224	-0.574270164551434	-0.0307376748768701	4	-0.116434734639832	0.311568686207347	0.155784343103673	0.483068275757565	0.752897232969487	0.0949755906049865	0.217617105574507	0.298103539537341	-0.303583764409572	4	0.0767781178268157	0.266974950285013	0.133487475142507	0.586081869698019	0.795867431913124	-0.102899907584291	0.00212630110838796	-0.61541629726287	-0.110423989693651	4	-0.206653473358106	0.277309067269708	0.138654533634854	0.186701123751882	0.574581612056707	-0.197146470177337	-0.0850815008897681	-0.368170894240869	-0.152381207728669	4	-0.200695018259161	0.120777303215227	0.0603886516076136	0.0159370597085451	0.153240518659198	-0.358135108044367	0.179808359177015	0.310210300127865	0.031478231473168	4	0.0408404456834202	0.289333338896792	0.144666669448396	0.787193309282536
M0R0F0	-0.0285200400100499	-0.132708919666383	0.0497270493538055	0.09737984176971	4	-0.00353051713822927	0.100549829863389	0.0502749149316946	0.946297259661142	0.985753485856524	0.132450296023649	-0.00128410782032506	0.034527683128271	0.110897890115377	4	0.069147940361743	0.0630065662155154	0.0315032831077577	0.0705922192907887	0.298842799268029	-0.00654878582893811	-0.0968024329969367	0.0517946152180008	0.0244689955938996	4	-0.00677190200349361	0.0645796069822228	0.0322898034911114	0.840824063978304	0.955174769191795	0.0808382771224287	0.0283198959693214	0.0286358679608878	0.045218752156492	4	0.0457531983022825	0.0246858354577916	0.0123429177288958	0.0100069868272095	0.129278295635274	-0.000888632637204845	-0.0630242871438074	0.0878178787914174	0.0891258904729838	4	0.0282577123708472	0.0740141008912969	0.0370070504456485	0.474064618959493
M0R0P8	-0.0461601991457803	-0.0468575435946775	0.00764546061085844	-0.062144521495872	4	-0.0368792009063678	0.0305858690620321	0.015292934531016	0.0524652701152159	0.272750610642418	0.0169730786037136	-0.0443139005566374	-0.0404993622797528	-0.0588186444468836	4	-0.0316647071698901	0.0333717632080746	0.0166858816040373	0.106509737667667	0.370090732148686	0.0284666553020602	-0.019279062494883	-0.0420417708169257	-0.00952277411850655	4	-0.0105942380320638	0.0293897653227719	0.014694882661386	0.498057706019758	0.800015114398368	-0.0203677976939618	-0.0750044282018169	-0.0449258708815163	-0.0786642770458846	4	-0.0547405934557949	0.0274516757401533	0.0137258378700766	0.00721586416109276	0.106696990978983	0.117662291735237	-0.0163202536863659	0.0494460679188986	-0.10067269846795	4	0.012528851874955	0.0932072652908851	0.0466036326454426	0.797059056753413
M0R165	0.0961757074392649	0.16671972342781	0.0408123245460578	-0.0942503257960511	4	0.0523643574042705	0.110492682900052	0.0552463414500261	0.379808586827388	0.680235147286924	-0.00213574434399111	0.0871608010438787	0.0698345518642237	-0.110383055787907	4	0.0111191381940511	0.08975579711074	0.04487789855537	0.812577955567405	0.91711174505479	0.0284666553020602	0.143680445322407	0.00376191879619908	-0.0760001590901254	4	0.0249772150826352	0.0908279544959374	0.0454139772479687	0.602183140528919	0.847091500148405	-0.0364106401896849	0.0205088588004206	0.023623604525899	-0.128007612376071	4	-0.0300714473098592	0.0708830110160358	0.0354415055080179	0.428715727855531	0.704232025465002	0.0928872975415486	0.224940330074442	0.0513890918366915	-0.0874628412503393	4	0.0704384695505856	0.128673329957996	0.0643366649789979	0.315577647423879
M0R2A0	NA	NA	NA	NA	0	NA	NA	NA	NA	NA	NA	NA	NA	NA	0	NA	NA	NA	NA	NA	NA	NA	NA	NA	0	NA	NA	NA	NA	NA	NA	NA	NA	NA	0	NA	NA	NA	NA	NA	NA	NA	NA	NA	0	NA	NA	NA	NA
O00115	-0.0704507204759682	-0.276544692240034	0.214706228191316	0.249027547839915	4	0.029184590828807	0.249096228702645	0.124548114351322	0.822524813595475	0.930573544722725	-0.0117859143777105	0.222025650000828	-0.00166496849511011	0.314343499659371	4	0.130729566696845	0.163184993692456	0.0815924968462279	0.160225605055762	0.45202993798588	-0.119839770006003	-0.495248379366302	-0.0151465437538654	-0.12691211248222	4	-0.189286701402098	0.210278235132788	0.105139117566394	0.121894141193812	0.483018672175939	-0.0714009173035737	-0.0419136417333945	0.116000596725835	0.16234382245791	4	0.0412574650366944	0.11526460254725	0.0576323012736248	0.500967073184322	0.760908739241787	-0.122304096929939	0.0972619220307934	0.175948789070082	0.201018770543881	4	0.0879813461787046	0.14699413478946	0.0734970673947299	0.276424242311603
O00116	0.0447289420205887	0.0657164047443347	-0.0658736072140893	-0.00571365119439365	4	0.00971452208911012	0.0586339329697133	0.0293169664848566	0.751638697008717	0.902691711542496	0.0327060048683098	0.0279650085359785	0.0280143761695966	0.00359774510860439	4	0.0230707836706223	0.0131710447851185	0.00658552239255923	0.0127756357609818	0.136885534053084	0.024617755622432	-0.00426202685415955	-0.00188464434494295	-0.0210336998721968	4	-0.000640653862216824	0.0188726029818115	0.00943630149090575	0.948077180023907	0.989973374783493	-0.029513280243014	-0.0583641625139887	0.0135465318379478	-0.00340660144324945	4	-0.0194343780905761	0.0314204945209428	0.0157102472604714	0.262286120679928	0.579598642408935	0.0761310692159706	0.0241393535854178	-0.00201353143764832	-0.0376142917997777	4	0.0151606498909906	0.0478823423524413	0.0239411711762206	0.549932460681066
O00139	-0.192820492258484	-0.0349997093804599	-0.0499144285344295	-0.062144521495872	4	-0.0849697879173114	0.0727522145929566	0.0363761072964783	0.058171789583296	0.284083484197987	0.35734377844454	0.00512503217786717	-0.130531563142225	-0.0383281186590995	4	0.0484022822052707	0.213586244807907	0.106793122403953	0.666309584758528	0.837875987822392	0.555922827769802	0.0847064973029538	-0.0615643290817444	-0.00952277411850655	4	0.142385555468126	0.282259718072581	0.14112985903629	0.351964537010064	0.714086439853304	-0.900164732420205	-0.00158974676239254	0.147060893090575	-0.0804620281082788	4	-0.208788903550075	0.47047100231195	0.235235501155975	0.408936571099837	0.696209866339797	1.01370426920788	0.131738353252572	-0.558051346619562	0.0140751852117228	4	0.150366615263154	0.649648694677324	0.324824347338662	0.659738046448006
O00148	-0.0222718923448722	-0.00384718905552073	-0.0658736072140893	-0.100350525332469	4	-0.0480858034867378	0.0434795742323851	0.0217397871161925	0.0689645228921995	0.306587871622234	-0.0334646850353568	-0.0390292974283696	-0.0473611827820118	0.00718654059326923	4	-0.0281671561631172	0.0242510787197042	0.0121255393598521	0.0592084422326284	0.275364801337286	0.0738698966263596	0.0336503894419168	0.0626556078497676	0.0113449735940093	4	0.0453802168780133	0.0283201201884941	0.014160060094247	0.0184877106452306	0.238839099489453	-0.112110366321537	-0.00796630981005678	0.0202723950262611	-0.0205613224823165	4	-0.0300914008969124	0.0572828208084149	0.0286414104042075	0.333893157470537	0.635769112892828	0.107803289534515	0.0603859197957608	0.0140165783813007	-0.0503735225151192	4	0.0329580662991143	0.0674710511934207	0.0337355255967104	0.366321393239368
O00151	-0.236995347054166	0.119756244457224	-0.00768619314513207	0.0777023569932438	4	-0.0118057346872077	0.159214305233726	0.0796071526168628	0.886964576552875	0.959318037538226	0.0379124162960764	-0.00256935961213325	-0.0336700238896364	0.271713647068131	4	0.0683466699656094	0.138709360713286	0.0693546803566429	0.362451245318904	0.646047642197736	-0.160157225193492	0.390898145693426	0.0662578445299633	0.0374747054186629	4	0.0836183676121401	0.228238199393918	0.114119099696959	0.491345640436848	0.797286247242388	0.157386290141953	0.0591478860484801	-0.139205818980935	-0.0136749368970766	4	0.0159133550781053	0.124928301045807	0.0624641505229037	0.80741572077284	0.915535530343697	-0.122304096929939	-0.00324931452870608	0.106627728566176	0.057195401581543	4	0.00956742967226852	0.0987311058546986	0.0493655529273493	0.852721232158608
O00154	0.16568961355569	-0.10558587130462	-0.0404229795571318	-0.00762324120302504	4	0.0030143803727283	0.115840708713847	0.0579203543569237	0.960183430074067	0.986674176716864	0.100957748620112	0.148662032803076	0.057095440033546	-0.0853255981962689	4	0.0553474058151163	0.100961828862706	0.0504809144313532	0.314946604508011	0.609919016929993	0.160602222371249	-0.247794527773501	-0.00755339443163505	-0.0038015701598561	4	-0.024636817498436	0.168165411051532	0.0840827055257658	0.779386442024081	0.930891036838719	0.124781624710026	-0.127843820520571	-0.0732844260352317	-0.0466820427853945	4	-0.0307571661577928	0.109057023995504	0.0545285119977521	0.593157357150477	0.81579625052509	0.225688272964321	-0.152183419055045	-0.216702629552487	-0.0837107063892318	4	-0.0567271205081107	0.195951215700474	0.097975607850237	0.583660669962969
O00159	-0.0436269324002582	0.308417808481122	0.0348384235014249	0.218313552233	4	0.129485712953822	0.16210405837298	0.0810520291864901	0.1612547433271	0.464702658796781	-0.00534530081988133	0.264317371717267	0.0377733426319251	0.383628794559535	4	0.170093552022211	0.1850791334385	0.0925395667192501	0.115688289345557	0.392069168936793	0.100928908850781	0.395758436783961	0.0770109008268377	0.489488852493477	4	0.265796774738764	0.207966101919614	0.103983050959807	0.0431314670132472	0.328429281564348	0.0594329135191578	0.197205866008502	0.0517989005802049	-0.0205613224823165	4	0.071969089406387	0.090939759476884	0.045469879738442	0.164558142173971	0.468041682330764	-0.0850773496853885	0.286109432524102	0.21287535806844	-0.079968304703415	4	0.0834847840509345	0.194017846229441	0.0970089231147207	0.422515480382213
O00160	-0.109656802735455	-0.0271482884192021	-0.0515024254376216	-0.0701042384643486	4	-0.0646029387641569	0.0348070358740736	0.0174035179370368	0.00994529942486328	0.110873589485407	-0.0323729747744927	0.0191257114871856	-0.0542557958604205	-0.0513338284838628	4	-0.0297092219078976	0.0339710867327323	0.0169855433663661	0.130855404329443	0.416834443928246	0.0284666553020602	0.0148187147115452	-0.0285314844106853	0.0503642171765386	4	0.0162795256948647	0.0332688689161112	0.0166344344580556	0.365541294028313	0.71909677918796	-0.0549664592179286	-0.00796630981005678	-0.0519634216214504	0.00509486712276347	4	-0.0274503308816681	0.0305332929029991	0.0152666464514996	0.122280672319258	0.409362649414305	-0.0196774847764661	0.119839770006003	-0.0935118859231442	-0.0725124997843678	4	-0.0164655251194938	0.0960327292233541	0.048016364611677	0.743357450208359
O00161	0.125735505166379	-0.0212876369979597	-0.196812500950732	0.234560289705757	4	0.035548914230861	0.187048451453769	0.0935242257268847	0.716959921585377	0.886481074288514	0.0180272949757151	0.010231922610956	0.034527683128271	0.413686028415715	4	0.119118232282664	0.196639563300001	0.0983197816500003	0.271234025941259	0.573680144700585	0.0614005446641431	0.0726168033075441	-0.140331414314087	0.297423131378714	4	0.0727772662590784	0.178895248673251	0.0894476243366254	0.446934980270893	0.772048254490805	0	0.0848435005525442	-0.034433497063874	0.223364260403773	4	0.0684435659731108	0.114800684143315	0.0574003420716575	0.278122830795223	0.595190620428685	0.256505019889314	-0.152183419055045	0.119650209359765	0.411053985360346	4	0.158756448888595	0.239040951505031	0.119520475752516	0.232374377373098
O00170	0.143629626546776	0.16671972342781	0.130377709342044	-0.0229916426262292	4	0.1044338541726	0.0862673730065756	0.0431336865032878	0.0517808395072064	0.271759510122022	0.0159180913238756	0.00895689376889422	0.0840328680671996	0.122525892368216	4	0.0578584363820464	0.0548249765201601	0.0274124882600801	0.0793004605443574	0.318935917197895	0.0450275749299427	0.118420492920669	-0.0420417708169257	-0.0840262996290432	4	0.00934499935116066	0.0904240180463238	0.0452120090231619	0.843085531427119	0.955981831021824	0.0850815008897681	-0.0534092805712239	0.0616131904071607	0.0567143909943214	4	0.0374999504300066	0.061857727336702	0.030928863668351	0.270907074505098	0.587483562574542	0.0437478953651674	0.0400107462282998	0.279042282034186	0.0605899797144671	4	0.10584772583553	0.115809491132432	0.0579047455662161	0.117318818156235
O00178	0.188495203871948	0.0565096406277076	0.070316318856141	-0.156445087403395	4	0.0397190189881005	0.14356511827881	0.071782559139405	0.600036550808164	0.823755900587229	0.214750200685913	-0.021986813439374	0.034527683128271	-0.126022179565497	4	0.0253172227023282	0.14272464426658	0.07136232213329	0.734898523779825	0.880378207928072	0.189538110940847	0.0705919678300537	0.0644578504837531	0.0393231298110315	4	0.0909777647664214	0.0670850945210338	0.0335425472605169	0.0349984974341138	0.300222797296505	-0.00224894050356217	-0.0484713577555569	-0.0484403550577532	-0.0466820427853945	4	-0.0364606740255667	0.0228231488566602	0.0114115744283301	0.0187163488429182	0.166410360447476	0.0574716139843703	-0.0212525492285966	-0.0223049354307245	-0.0669458239098263	4	-0.0132579236461943	0.0517391553486763	0.0258695776743381	0.626620766803833
O00182	0.0659975587742401	0.0675507279932147	-0.0154135551697429	-0.0463556356917396	4	0.0179447739764931	0.0577844892904052	0.0288922446452026	0.557381225198387	0.796296523523027	0.0657069014370603	-0.0167832188318343	0.0181889463135232	-0.114276971892398	4	-0.0117910857434122	0.0762299560358327	0.0381149780179163	0.767512446326308	0.896873456318439	0.0788276164223272	-0.0171241777912091	0.0149891742194532	-0.10225005824795	4	-0.0063893613493448	0.0753292430545864	0.0376646215272932	0.870869667248808	0.965043623201301	0.0808382771224287	-0.0750044282018169	0.0616131904071607	-0.0768687633842705	4	-0.0023554310141245	0.0853293444901008	0.0426646722450504	0.957765210187685	0.98294235042511	0.118480842135005	0.0588287744304665	0.0649174766813386	-0.125530882083859	4	0.0291740527907379	0.1065618980757	0.0532809490378499	0.603755576557659
O00186	0.0351746353073399	0.144298428720015	-0.0868880241735184	-0.0229916426262292	4	0.0173983493069019	0.0981947480623411	0.0490973740311706	0.735187554637918	0.893485045036884	0.0626449369889958	0.0943923702749546	-0.010018755824991	0	4	0.0367546378597398	0.0501034581240247	0.0250517290620124	0.192704080958787	0.488352203387859	0.0874628412503393	0.0294867645003806	-0.0266117302473197	-0.0248911755417107	4	0.0163616749904224	0.05408682850417	0.027043414252085	0.567330787347375	0.838240943377866	0.00672586318831336	0.0189415636534602	0.023623604525899	-0.0309529283289121	4	0.00458452575969011	0.0247393547910463	0.0123696773955231	0.723648645688218	0.882081340547899	0.105327975731583	0.133218799807203	0.0298705295821378	-0.112092507759054	4	0.0390811993404675	0.109831460822872	0.054915730411436	0.503393586131939
O00193	-0.0247679051489422	-0.210594429515133	-0.323462061050899	0.0848888975865131	4	-0.118483874532115	0.183160747836841	0.0915803739184204	0.243313581005895	0.557833605578431	0.0554749788261041	-0.158578352214142	-0.190032574890887	0.0285338357369732	4	-0.0661505281354879	0.126025866230996	0.0630129331154978	0.33424630698307	0.627204470667239	0.00130619750062472	0.0460696486959847	-0.0208677477125158	0.144389909335175	4	0.0427245019548171	0.0732723122471843	0.0366361561235921	0.287793387878618	0.662884805204469	0.0156451808768354	-0.115742053591564	-0.202399645468129	0.0386084540356654	4	-0.065972016036798	0.11356055104814	0.0567802755240701	0.289407879068519	0.598620363526465	0.0255350921071374	-0.264658148313458	-0.128277304083821	0.207157907641288	4	-0.0400606131622134	0.203015624137017	0.101507812068508	0.706743807226208
O00203	0.0753505577619025	0.0730397455501935	0.0243242017574888	0.0668549747562515	4	0.0598923699564591	0.0239818091467916	0.0119909045733958	0.00246503493633965	0.0494898801813381	-0.0258400049352596	0.010231922610956	0.034527683128271	0.0125530503430846	4	0.007868162786763	0.0249967073027437	0.0124983536513719	0.552199823010714	0.77397962460971	0.0297473433940519	0.0583829101348362	0.00563920603686946	0.0503642171765386	4	0.036033419185574	0.0235810266848487	0.0117905133424243	0.022335378644402	0.252883331992612	0.0658879356564572	0.0606721281774699	0.0336307778812802	-0.0326921630674488	4	0.0318746696619396	0.0453069372368454	0.0226534686184227	0.209042226708632	0.522692019305371	-0.069146161040766	0.0603859197957608	0.0140165783813007	0.0690416444296514	4	0.0185744953914867	0.063274050803184	0.031637025401592	0.578535295028236
O00217	0.0411534877967615	0.121523170631412	0.00611960637989825	-0.0463556356917396	4	0.0306101572790829	0.070474246327243	0.0352371231636215	0.418403815518078	0.712688350273259	0.110873217485195	0.0479680331836025	-0.0353743301018853	-0.00360673948073331	4	0.0299650452715448	0.0639440865401398	0.0319720432700699	0.384816547993907	0.662471767987233	-0.0600375827858328	-0.145398199445563	-0.0793633970226603	0.113138975350735	4	-0.0429150509758302	0.110268336159473	0.0551341680797364	0.465925916418367	0.782931653881447	-0.149009949133067	-0.046829132147511	-0.158064846232251	-0.0292157877928547	4	-0.0957799288264209	0.0671808786415041	0.033590439320752	0.0291279351167853	0.213367744059384	-0.13883667804861	0.0525833315995681	0.0219653314967916	0.0690416444296514	4	0.00118840736935018	0.0953663202930256	0.0476831601465128	0.98092460661705
O00221	-0.0550618274625417	-0.0749108310703838	0.0526864248343496	NA	3	-0.0257620778995253	0.0686594598139696	0.0396405576060097	0.472423860758724	0.745973818382216	-0.167259759522482	0.0713669291762311	-0.0733876560386167	NA	3	-0.056426828794956	0.120214085636502	0.069405634702619	0.375818018569294	0.656064483129988	-0.0573155158634045	-0.0410068081282922	0.12097210344059	NA	3	0.00754992648296461	0.0985643756960524	0.0569061688406233	0.880209683277186	0.969201233247017	0.226239610391969	-0.287389676182884	0.169925001442312	NA	3	0.0362583118837991	0.281698152159358	0.162638503979426	0.800523149472552	0.912946034278345	-0.31550182572793	-0.526912929680352	-0.119507094456089	NA	3	-0.320640616621457	0.203751525203078	0.117635997923794	0.0224995391065068
O00231	-0.0990972310491693	-0.0409164437468922	0.00764546061085844	0.028233680728944	4	-0.0260336333640648	0.056683360584399	0.0283416802921995	0.393751306304831	0.692040813348548	-0.0411298759598548	0.00384547995129486	0.0132510234978562	0.0214531096663175	4	-0.000645065711096571	0.0279321529874212	0.0139660764937106	0.964659305084152	0.989143669328664	-0.030373649043519	0.0190248256817562	-0.03623614913572	-0.017186510816676	4	-0.0161928708285397	0.024793150559505	0.0123965752797525	0.239309377572152	0.619376925000527	0.0178664207935137	0.0468956252244614	-0.0396701454300211	0.0269670476002694	4	0.0130147370470559	0.037156503379903	0.0185782516899515	0.509831633551745	0.766159338165687	-0.164494037628247	-0.0749404201225849	-0.0658691308540155	-0.0394301448285376	4	-0.0861834333583462	0.0543369026301815	0.0271684513150908	0.0192653326177573
O00232	0.0363723896649619	-0.0251920914538757	0.00916970273984824	0.00758317141906417	4	0.00698329309249965	0.025193349712476	0.012596674856238	0.599360345897568	0.823201420103747	0.0554749788261041	-0.0469634789705867	-0.00500068105836646	0.0089775961192573	4	0.00312210372910205	0.0422281720700149	0.0211140860350074	0.887290788053859	0.95310370322197	-0.0397461787927565	-0.0542022815899131	-0.0517700277788062	-0.0740005814437769	4	-0.0549297674013132	0.0141980104400106	0.00709900522000532	0.000244699491587554	0.0213705731066564	-0.0341078543202642	-0.0386459278994835	-0.0153934541233759	-0.0396701454300211	4	-0.0319543454432862	0.0113020878159227	0.00565104390796136	0.00131344423744312	0.0415627982351781	-0.129088701497048	-0.137828126077975	0.00802614053891776	-0.00531379989646785	4	-0.0660511217331433	0.0781070587181984	0.0390535293590992	0.141732013445848
O00267	0.0327761392588232	0.105542385237523	0.0106923361697224	0.0356702695707257	4	0.0461702825591986	0.0411233291614753	0.0205616645807377	0.0658513639578371	0.301162894469806	0.0626449369889958	0.0329918256108112	-0.0133738620833715	-0.0291095886297208	4	0.0132883279716787	0.0421614293858516	0.0210807146929258	0.551698929492339	0.77397962460971	0.0713846332367652	0.0766579685294077	0.00751405365730662	0.0847804201970196	4	0.0600842689051248	0.0354772846250379	0.017738642312519	0.0147264537546653	0.211927378100938	0.0486099442246216	0	-0.0136749368970766	0.0219489728336448	4	0.0142209950402975	0.0272197304993227	0.0136098652496613	0.336325836203988	0.636459254653907	0.137180447936047	0.143539605484923	0.0513890918366915	-0.0124294495415179	4	0.0799199239290358	0.0745400264983302	0.0372700132491651	0.0756944539149404
O00273	0.162402042727303	0.175251357048927	0.229166162862846	-0.0581810710885293	4	0.127159622887637	0.126900683071548	0.0634503415357739	0.0919051412145507	0.35377993654871	0.0010666876943527	0.0798928005798395	0.163439302197357	-0.0144813767047317	4	0.0574793534417044	0.0818344037123042	0.0409172018561521	0.20968710761735	0.506836986275574	0.0886922363318829	-0.0388192488905281	0.196876547610401	0.0113449735940093	4	0.0645236271614413	0.102646864616087	0.0513234323080435	0.255403595299158	0.635984405757293	0.141176062960694	0.0967789981282772	0.150130458165338	0.104969559601543	4	0.123263769713963	0.0263235664205002	0.0131617832102501	8.40777927372134e-05	0.00868466794290844	0.146841388329271	0.110850986778748	0.202421000431273	0.301989247834032	4	0.190525655843331	0.0833106629452396	0.0416553314726198	0.00379500112266557
O00299	-0.087309371217655	-0.199522272016189	0.00153233688424644	0.0777023569932438	4	-0.0518992373390885	0.119300662649795	0.0596503313248976	0.417712898148769	0.712610660893753	-0.0323729747744927	-0.0350785098177334	0.0198311719215691	0.073730388533372	4	0.00652751896567876	0.0514377387542726	0.0257188693771363	0.808121365021984	0.916093825929464	-0.0237160689738075	-0.080960916517603	-0.0401039665754332	0.0113449735940093	4	-0.0333589946182086	0.0383095654030958	0.0191547827015479	0.132226865064496	0.499680222254012	-0.0785019736787177	0.0205088588004206	0.023623604525899	0.0616131904071607	4	0.00681092001369063	0.059866180096287	0.0299330900481435	0.827560598324036	0.925339243978641	-0.0869632258243717	-0.235706774617329	-0.0806878455655607	0.0280143761695966	4	-0.0938358674594161	0.108312726019035	0.0541563630095177	0.133857375460385
O00303	0.0447289420205887	-0.019339365208438	-0.0372729891334822	-0.0404790693550703	4	-0.0130906204191004	0.0396529221450153	0.0198264610725076	0.533599230571629	0.783638771919112	0.0116904105230251	-0.0103050083917385	0.0181889463135232	0.0196774847764661	4	0.00981295830531896	0.0138530799038484	0.00692653995192422	0.206331747580926	0.504949540839888	0.024617755622432	-0.00639777119815066	-0.0132445065094908	-0.017186510816676	4	-0.00305275822547137	0.0189778919077664	0.00948894595388322	0.758579762989016	0.925572893576831	0.11028205501491	0.015801856122893	0.0135465318379478	-0.0171140208638476	4	0.0306291055279759	0.0551835124182019	0.027591756209101	0.309460832171498	0.615865764091138	0.0202889225411785	-0.0295107002309054	0.00401865173739308	-0.0558764981925061	4	-0.01526990603621	0.0340987502049814	0.0170493751024907	0.404947764168322
O00330	0.0927256578694983	-0.087102692704873	-0.0467436689264859	-0.135414175027208	4	-0.0441337196972671	0.0981762958992839	0.0490881479496419	0.403252051947227	0.697867838343906	0.107905725782328	0.135869006251114	0.130376093799274	-0.0217769423952516	4	0.0880934708593662	0.0742391521559873	0.0371195760779937	0.0552760756459181	0.268027750299706	0.259982004729523	0.0604249416730548	-0.07142557759802	-0.254706046074647	4	-0.00143116931752255	0.216956528993793	0.108478264496896	0.989901444955309	0.998695086034424	0.254771094802654	-0.0484713577555569	-0.0840642647884744	-0.173331602885562	4	-0.0127740326567348	0.185935225998781	0.0929676129993906	0.895207182908594	0.956997860706299	0.260218522688378	0.0129245660894913	0.0878178787914174	-0.0142138592197007	4	0.0866867770873965	0.123472464272897	0.0617362321364483	0.209863967853419
O00399	0.153598384343071	0.202218404649197	0.181293548095888	-0.252806513159166	4	0.0710759559822475	0.216837930609782	0.108418965304891	0.53641403148631	0.784805575785913	-0.0565835283663675	-0.0298275666565573	0.0871691628695006	-0.194447320576381	4	-0.0484223131824514	0.115644168600619	0.0578220843003093	0.434429880447084	0.697441066697575	0.102146887007452	-0.101360714959241	0.0626556078497676	-0.0443347992358782	4	0.00477674516552519	0.0940000203956818	0.0470000101978409	0.922359441150531	0.98560448473718	-0.228397404161776	-0.0969277437378766	-0.0679245621332215	-0.142957953842043	4	-0.134051915968729	0.0700747689783271	0.0350373844891635	0.00869994382041985	0.119004208910087	0.183287023244162	0.116849727400192	0.193650790803541	-0.123603433512744	4	0.0925460269837875	0.14806233011387	0.0740311650569349	0.257811268825893
O00400	-0.0148096599791437	-0.0173937208934685	-0.0420005576704669	NA	3	-0.0247346461810264	0.0150084348742009	0.00866512391473488	0.0190065053189485	0.165581168816084	-0.0488360104867513	0.140534151919675	0.0329021110792289	NA	3	0.041533417504051	0.0949796777758721	0.0548365425314437	0.406826894344203	0.678519440646352	0.0310268956206242	-0.0586277299707084	-0.17818855834996	NA	3	-0.0685964642333482	0.104963366429097	0.0606006278628882	0.23403446176709	0.616814453288502	0.0594329135191578	0.022074453138423	-0.0484403550577532	NA	3	0.0110223371999425	0.0547793069361488	0.0316268476056067	0.694284482233132	0.867373467688113	-0.0617095721989843	0.28211119890488	-0.0892245275200461	NA	3	0.0437256997286166	0.206905782555049	0.119457109255048	0.68000243606918
O00410	-0.0260175328068798	-0.0668397888123671	0.0258309330076435	0.0722888608068795	4	0.00131561804881903	0.0606367943173097	0.0303183971586548	0.96679601115206	0.987446061762299	0.0657069014370603	0.00895689376889422	0.00498340751425566	0.0991754050908354	4	0.0447056519527614	0.0456940437465887	0.0228470218732944	0.0981378458489279	0.355988206810107	-0.0184120371138804	-0.0410068081282922	-0.00944793842141167	0.0263341478134625	4	-0.0106331589625304	0.0279943805488399	0.0139971902744199	0.476232917643834	0.791452506892418	-0.0180904569828959	0.0205088588004206	-0.0171140208638476	0.0745959105580238	4	0.0149750728779252	0.0436207377075698	0.0218103688537849	0.517973713595801	0.771427905807846	-0.0533889753651957	-0.104296089658495	0.0338069441413081	0.0366584705788482	4	-0.0218049125758837	0.069072409098917	0.0345362045494585	0.551081949969522
O00411	0.901560182970358	0.170138433655275	-0.270720598978926	NA	3	0.266992672548902	0.592111573629206	0.341855776425115	0.393419854447468	0.69192980374772	0.460207469713209	-0.0643053757441037	-0.323176641084621	NA	3	0.0242418176281614	0.399127949852182	0.230436629288261	0.90483915284916	0.960900873475662	0.687515152051601	0.0315700790008696	0.275224946700574	NA	3	0.331436725917681	0.331565691540827	0.191429541265141	0.0933118149888003	0.446182533933346	0.477701534061015	0.0758266271951105	-0.167587620350758	NA	3	0.128646846968456	0.325871147714926	0.188141794854345	0.450946514875052	0.722805575009164	0.347288621679883	0.0447383147652844	0.091599519333844	NA	3	0.161208818593004	0.16284429053867	0.094018194978495	0.0957152945428602
[truncated: 2,828 more rows]
[truncated: 191 more columns]
