# Supplementary material for: The Emerging Plasticizer Alternative DINCH and Its Metabolite MINCH Induce Oxidative Stress and Enhance Inflammatory Responses in Human THP-1 Macrophages
Source: Cells. 2021 Sep 9;10(9):2367. doi: 10.3390/cells10092367 (PMC8466537; doi:10.3390/cells10092367)
Supplement: Supplementary file 1 [file cells-10-02367-s001.zip › Supplement 6.csv]

Accession	Description	Genes
Q9Y490	Talin-1	TLN1
P21333	Filamin-A	FLNA
P35579	Myosin-9	MYH9
Q14204	Cytoplasmic dynein 1 heavy chain 1	DYNC1H1
P78527	DNA-dependent protein kinase catalytic subunit	PRKDC
Q09666	Neuroblast differentiation-associated protein AHNAK	AHNAK
P49327	Fatty acid synthase	FASN
A0A087WVQ6	Clathrin heavy chain	CLTC
P46940	Ras GTPase-activating-like protein IQGAP1	IQGAP1
O75369	Filamin-B	FLNB
P08238	Heat shock protein HSP 90-beta	HSP90AB1
P12814	Alpha-actinin-1	ACTN1
O43707	Alpha-actinin-4	ACTN4
P63261	Actin, cytoplasmic 2	ACTG1
P07900	Heat shock protein HSP 90-alpha	HSP90AA1
P14618	Pyruvate kinase PKM	PKM
P13796	Plastin-2	LCP1
P13639	Elongation factor 2	EEF2
P10809	60 kDa heat shock protein, mitochondrial	HSPD1
Q01518	Adenylyl cyclase-associated protein 1	CAP1
P11717	Cation-independent mannose-6-phosphate receptor	IGF2R
P11142	Heat shock cognate 71 kDa protein	HSPA8
P68104	Elongation factor 1-alpha 1	EEF1A1
Q92616	eIF-2-alpha kinase activator GCN1	GCN1
P07814	Bifunctional glutamate/proline--tRNA ligase	EPRS
P14625	Endoplasmin	HSP90B1
P42704	Leucine-rich PPR motif-containing protein, mitochondrial	LRPPRC
Q15149	Plectin	PLEC
P06733	Alpha-enolase	ENO1
P38646	Stress-70 protein, mitochondrial	HSPA9
Q9Y4L1	Hypoxia up-regulated protein 1	HYOU1
P11021	Endoplasmic reticulum chaperone BiP	HSPA5
P34932	Heat shock 70 kDa protein 4	HSPA4
P04406	Glyceraldehyde-3-phosphate dehydrogenase	GAPDH
P07437	Tubulin beta chain	TUBB
P13010	X-ray repair cross-complementing protein 5	XRCC5
P53621	Coatomer subunit alpha	COPA
Q96BY6	Dedicator of cytokinesis protein 10	DOCK10
Q71U36	Tubulin alpha-1A chain	TUBA1A
P53396	ATP-citrate synthase	ACLY
P06576	ATP synthase subunit beta, mitochondrial	ATP5F1B
P06396	Gelsolin	GSN
P68371	Tubulin beta-4B chain	TUBB4B
D3DSM0	Integrin beta	ITGB2
P07237	Protein disulfide-isomerase	P4HB
O75643	U5 small nuclear ribonucleoprotein 200 kDa helicase	SNRNP200
P05107	Integrin beta-2	ITGB2
P18206	Vinculin	VCL
P26640	Valine--tRNA ligase	VARS
P55072	Transitional endoplasmic reticulum ATPase	VCP
P33176	Kinesin-1 heavy chain	KIF5B
Q92598	Heat shock protein 105 kDa	HSPH1
P09874	Poly [ADP-ribose] polymerase 1	PARP1
P27797	Calreticulin	CALR
P78371	T-complex protein 1 subunit beta	CCT2
Q6P2Q9	Pre-mRNA-processing-splicing factor 8	PRPF8
Q9BSJ8	Extended synaptotagmin-1	ESYT1
P31939	Bifunctional purine biosynthesis protein PURH	ATIC
Q9P2E9	Ribosome-binding protein 1	RRBP1
P26038	Moesin	MSN
P12956	X-ray repair cross-complementing protein 6	XRCC6
P15311	Ezrin	EZR
P50395	Rab GDP dissociation inhibitor beta	GDI2
Q13200	26S proteasome non-ATPase regulatory subunit 2	PSMD2
Q14697	Neutral alpha-glucosidase AB	GANAB
F5H5D3	Tubulin alpha chain	TUBA1C
P00558	Phosphoglycerate kinase 1	PGK1
P48643	T-complex protein 1 subunit epsilon	CCT5
H3BR70	Pyruvate kinase	PKM
H0YFD6	Trifunctional enzyme subunit alpha, mitochondrial	HADHA
P53618	Coatomer subunit beta	COPB1
Q04637	Eukaryotic translation initiation factor 4 gamma 1	EIF4G1
P08670	Vimentin	VIM
Q14152	Eukaryotic translation initiation factor 3 subunit A	EIF3A
P04075	Fructose-bisphosphate aldolase A	ALDOA
P52272	Heterogeneous nuclear ribonucleoprotein M	HNRNPM
O14980	Exportin-1	XPO1
P49588	Alanine--tRNA ligase, cytoplasmic	AARS
Q7KZF4	Staphylococcal nuclease domain-containing protein 1	SND1
P22314	Ubiquitin-like modifier-activating enzyme 1	UBA1
P68366	Tubulin alpha-4A chain	TUBA4A
O75083	WD repeat-containing protein 1	WDR1
Q13813	Spectrin alpha chain, non-erythrocytic 1	SPTAN1
Q9Y678	Coatomer subunit gamma-1	COPG1
P05023	Sodium/potassium-transporting ATPase subunit alpha-1	ATP1A1
Q86UX7	Fermitin family homolog 3	FERMT3
P29401	Transketolase	TKT
P50990	T-complex protein 1 subunit theta	CCT8
Q6ZS81	WD repeat- and FYVE domain-containing protein 4	WDFY4
P29350	Tyrosine-protein phosphatase non-receptor type 6	PTPN6
P50991	T-complex protein 1 subunit delta	CCT4
P02545	Prelamin-A/C	LMNA
Q9NYU2	UDP-glucose:glycoprotein glucosyltransferase 1	UGGT1
P30101	Protein disulfide-isomerase A3	PDIA3
Q86VP6	Cullin-associated NEDD8-dissociated protein 1	CAND1
Q7L576	Cytoplasmic FMR1-interacting protein 1	CYFIP1
O00410	Importin-5	IPO5
Q08211	ATP-dependent RNA helicase A	DHX9
O60610	Protein diaphanous homolog 1	DIAPH1
Q8NF50	Dedicator of cytokinesis protein 8	DOCK8
P23141	Liver carboxylesterase 1	CES1
P25705	ATP synthase subunit alpha, mitochondrial	ATP5F1A
Q99832	T-complex protein 1 subunit eta	CCT7
P22102	Trifunctional purine biosynthetic protein adenosine-3	GART
Q13885	Tubulin beta-2A chain	TUBB2A
O75533	Splicing factor 3B subunit 1	SF3B1
Q9P2J5	Leucine--tRNA ligase, cytoplasmic	LARS
P11586	C-1-tetrahydrofolate synthase, cytoplasmic	MTHFD1
P17987	T-complex protein 1 subunit alpha	TCP1
P49368	T-complex protein 1 subunit gamma	CCT3
P13667	Protein disulfide-isomerase A4	PDIA4
P06737	Glycogen phosphorylase, liver form	PYGL
P08133	Annexin A6	ANXA6
Q14974	Importin subunit beta-1	KPNB1
A0A0A0MTS2	Glucose-6-phosphate isomerase (Fragment)	GPI
P55060	Exportin-2	CSE1L
E9PKU7	Neutral alpha-glucosidase AB	GANAB
A0A024R4E5	High density lipoprotein binding protein (Vigilin), isoform CRA_a	HDLBP
P04843	Dolichyl-diphosphooligosaccharide--protein glycosyltransferase subunit 1	RPN1
P07355	Annexin A2	ANXA2
P27824	Calnexin	CANX
A0A0A0MRM8	Unconventional myosin-VI	MYO6
P68032	Actin, alpha cardiac muscle 1	ACTC1
A0A0D9SGC1	Unconventional myosin-VI	MYO6
P52209	6-phosphogluconate dehydrogenase, decarboxylating	PGD
Q8WUM4	Programmed cell death 6-interacting protein	PDCD6IP
P19338	Nucleolin	NCL
O95466	Formin-like protein 1	FMNL1
Q16555	Dihydropyrimidinase-related protein 2	DPYSL2
K7EKE6	Lon protease homolog, mitochondrial	LONP1
P08758	Annexin A5	ANXA5
P13489	Ribonuclease inhibitor	RNH1
O60506	Heterogeneous nuclear ribonucleoprotein Q	SYNCRIP
P18669	Phosphoglycerate mutase 1	PGAM1
A2A274	Aconitate hydratase, mitochondrial	ACO2
Q00839	Heterogeneous nuclear ribonucleoprotein U	HNRNPU
Q63HN8	E3 ubiquitin-protein ligase RNF213	RNF213
A0A1W2PPS1	Heterogeneous nuclear ribonucleoprotein U	HNRNPU
P16615	Sarcoplasmic/endoplasmic reticulum calcium ATPase 2	ATP2A2
P35606	Coatomer subunit beta'	COPB2
P30153	Serine/threonine-protein phosphatase 2A 65 kDa regulatory subunit A alpha isoform	PPP2R1A
P11215	Integrin alpha-M	ITGAM
P07195	L-lactate dehydrogenase B chain	LDHB
P23381	Tryptophan--tRNA ligase, cytoplasmic	WARS
P54136	Arginine--tRNA ligase, cytoplasmic	RARS
P60174	Triosephosphate isomerase	TPI1
Q99460	26S proteasome non-ATPase regulatory subunit 1	PSMD1
Q13263	Transcription intermediary factor 1-beta	TRIM28
Q5VZU9	Tripeptidyl-peptidase 2	TPP2
Q5T0R9	Adenylyl cyclase-associated protein 1 (Fragment)	CAP1
A8MXP9	Matrin-3	MATR3
Q3BDU5	Prelamin-A/C	LMNA
P02786	Transferrin receptor protein 1	TFRC
P31948	Stress-induced-phosphoprotein 1	STIP1
Q5T4S7	E3 ubiquitin-protein ligase UBR4	UBR4
Q02880	DNA topoisomerase 2-beta	TOP2B
P48147	Prolyl endopeptidase	PREP
V9GYM8	Rho guanine nucleotide exchange factor 2	ARHGEF2
Q92608	Dedicator of cytokinesis protein 2	DOCK2
E9PHY5	Band 4.1-like protein 2	EPB41L2
P61978	Heterogeneous nuclear ribonucleoprotein K	HNRNPK
Q12965	Unconventional myosin-Ie	MYO1E
A0A0G2JIW1	Heat shock 70 kDa protein 1B	HSPA1B
P04844	Dolichyl-diphosphooligosaccharide--protein glycosyltransferase subunit 2	RPN2
Q01813	ATP-dependent 6-phosphofructokinase, platelet type	PFKP
O60763	General vesicular transport factor p115	USO1
Q92835	Phosphatidylinositol 3,4,5-trisphosphate 5-phosphatase 1	INPP5D
Q68CZ2	Tensin-3	TNS3
P61158	Actin-related protein 3	ACTR3
P04040	Catalase	CAT
P41250	Glycine--tRNA ligase	GARS
P54577	Tyrosine--tRNA ligase, cytoplasmic	YARS
A0A0A6YYL4	Coronin	CORO7-PAM16
A0A2R8YEA7	Actin, cytoplasmic 1 (Fragment)	ACTB
P00338	L-lactate dehydrogenase A chain	LDHA
Q13045	Protein flightless-1 homolog	FLII
Q15029	116 kDa U5 small nuclear ribonucleoprotein component	EFTUD2
P17812	CTP synthase 1	CTPS1
Q9BUF5	Tubulin beta-6 chain	TUBB6
Q15393	Splicing factor 3B subunit 3	SF3B3
A0A2U3TZM0	Chromodomain-helicase-DNA-binding protein 4	CHD4
O15144	Actin-related protein 2/3 complex subunit 2	ARPC2
P60842	Eukaryotic initiation factor 4A-I	EIF4A1
P17858	ATP-dependent 6-phosphofructokinase, liver type	PFKL
P05455	Lupus La protein	SSB
Q9UH99	SUN domain-containing protein 2	SUN2
Q16658	Fascin	FSCN1
P40926	Malate dehydrogenase, mitochondrial	MDH2
P41252	Isoleucine--tRNA ligase, cytoplasmic	IARS
P49411	Elongation factor Tu, mitochondrial	TUFM
Q10567	AP-1 complex subunit beta-1	AP1B1
P26639	Threonine--tRNA ligase, cytoplasmic	TARS
P51854	Transketolase-like protein 1	TKTL1
P63104	14-3-3 protein zeta/delta	YWHAZ
Q8TDZ2	[F-actin]-monooxygenase MICAL1	MICAL1
Q0VD83	Apolipoprotein B receptor	APOBR
P13645	Keratin, type I cytoskeletal 10	KRT10
P21980	Protein-glutamine gamma-glutamyltransferase 2	TGM2
Q9Y3Z3	Deoxynucleoside triphosphate triphosphohydrolase SAMHD1	SAMHD1
P40227	T-complex protein 1 subunit zeta	CCT6A
O60841	Eukaryotic translation initiation factor 5B	EIF5B
P04264	Keratin, type II cytoskeletal 1	KRT1
P63010	AP-2 complex subunit beta	AP2B1
P25205	DNA replication licensing factor MCM3	MCM3
Q9Y6N5	Sulfide:quinone oxidoreductase, mitochondrial	SQOR
P46459	Vesicle-fusing ATPase	NSF
E9PLK3	Aminopeptidase	NPEPPS
P14868	Aspartate--tRNA ligase, cytoplasmic	DARS
O60664	Perilipin-3	PLIN3
O00160	Unconventional myosin-If	MYO1F
Q12906	Interleukin enhancer-binding factor 3	ILF3
P38606	V-type proton ATPase catalytic subunit A	ATP6V1A
Q02218	2-oxoglutarate dehydrogenase, mitochondrial	OGDH
P49792	E3 SUMO-protein ligase RanBP2	RANBP2
P00491	Purine nucleoside phosphorylase	PNP
Q15084	Protein disulfide-isomerase A6	PDIA6
P48735	Isocitrate dehydrogenase [NADP], mitochondrial	IDH2
Q32Q12	Nucleoside diphosphate kinase	NME1-NME2
P14780	Matrix metalloproteinase-9	MMP9
Q13509	Tubulin beta-3 chain	TUBB3
Q9NZ08	Endoplasmic reticulum aminopeptidase 1	ERAP1
P11216	Glycogen phosphorylase, brain form	PYGB
P28838	Cytosol aminopeptidase	LAP3
P00367	Glutamate dehydrogenase 1, mitochondrial	GLUD1
P26599	Polypyrimidine tract-binding protein 1	PTBP1
P34897	Serine hydroxymethyltransferase, mitochondrial	SHMT2
P49748	Very long-chain specific acyl-CoA dehydrogenase, mitochondrial	ACADVL
P52566	Rho GDP-dissociation inhibitor 2	ARHGDIB
E7EVA0	Microtubule-associated protein	MAP4
Q9UHB9	Signal recognition particle subunit SRP68	SRP68
D3DQV9	Eukaryotic translation initiation factor 4 gamma 2 (Fragment)	EIF4G2
O43143	Pre-mRNA-splicing factor ATP-dependent RNA helicase DHX15	DHX15
A0A1B0GVD5	Cathepsin D	CTSD
P50570	Dynamin-2	DNM2
O95373	Importin-7	IPO7
P22234	Multifunctional protein ADE2	PAICS
O43175	D-3-phosphoglycerate dehydrogenase	PHGDH
P49736	DNA replication licensing factor MCM2	MCM2
Q96QK1	Vacuolar protein sorting-associated protein 35	VPS35
J3KTA4	Probable ATP-dependent RNA helicase DDX5	DDX5
P16284	Platelet endothelial cell adhesion molecule	PECAM1
O94804	Serine/threonine-protein kinase 10	STK10
O95352	Ubiquitin-like modifier-activating enzyme ATG7	ATG7
P23469	Receptor-type tyrosine-protein phosphatase epsilon	PTPRE
P55160	Nck-associated protein 1-like	NCKAP1L
P51858	Hepatoma-derived growth factor	HDGF
Q96KP4	Cytosolic non-specific dipeptidase	CNDP2
Q8TEX9	Importin-4	IPO4
Q13576	Ras GTPase-activating-like protein IQGAP2	IQGAP2
Q32MZ4	Leucine-rich repeat flightless-interacting protein 1	LRRFIP1
Q15418	Ribosomal protein S6 kinase alpha-1	RPS6KA1
P06748	Nucleophosmin	NPM1
O15523	ATP-dependent RNA helicase DDX3Y	DDX3Y
E5RK69	Annexin	ANXA6
Q13310	Polyadenylate-binding protein 4	PABPC4
P63244	Receptor of activated protein C kinase 1	RACK1
Q06210	Glutamine--fructose-6-phosphate aminotransferase [isomerizing] 1	GFPT1
P49915	GMP synthase [glutamine-hydrolyzing]	GMPS
Q5T6W2	Heterogeneous nuclear ribonucleoprotein K (Fragment)	HNRNPK
P22626	Heterogeneous nuclear ribonucleoproteins A2/B1	HNRNPA2B1
Q13177	Serine/threonine-protein kinase PAK 2	PAK2
Q9Y5B9	FACT complex subunit SPT16	SUPT16H
P14317	Hematopoietic lineage cell-specific protein	HCLS1
O00571	ATP-dependent RNA helicase DDX3X	DDX3X
O76094	Signal recognition particle subunit SRP72	SRP72
Q96G03	Phosphoglucomutase-2	PGM2
Q9UQE7	Structural maintenance of chromosomes protein 3	SMC3
Q16531	DNA damage-binding protein 1	DDB1
Q14240	Eukaryotic initiation factor 4A-II	EIF4A2
A0A1W2PQ51	Probable ATP-dependent RNA helicase DDX17	DDX17
P43304	Glycerol-3-phosphate dehydrogenase, mitochondrial	GPD2
P48444	Coatomer subunit delta	ARCN1
O43242	26S proteasome non-ATPase regulatory subunit 3	PSMD3
P31146	Coronin-1A	CORO1A
P47897	Glutamine--tRNA ligase	QARS
O00299	Chloride intracellular channel protein 1	CLIC1
P11940	Polyadenylate-binding protein 1	PABPC1
P27708	CAD protein	CAD
P62258	14-3-3 protein epsilon	YWHAE
P17980	26S proteasome regulatory subunit 6A	PSMC3
P50454	Serpin H1	SERPINH1
Q15067	Peroxisomal acyl-coenzyme A oxidase 1	ACOX1
P61981	14-3-3 protein gamma	YWHAG
P37802	Transgelin-2	TAGLN2
P04899	Guanine nucleotide-binding protein G(i) subunit alpha-2	GNAI2
P21796	Voltage-dependent anion-selective channel protein 1	VDAC1
P67809	Nuclease-sensitive element-binding protein 1	YBX1
P28331	NADH-ubiquinone oxidoreductase 75 kDa subunit, mitochondrial	NDUFS1
P45974	Ubiquitin carboxyl-terminal hydrolase 5	USP5
P54578	Ubiquitin carboxyl-terminal hydrolase 14	USP14
Q14980	Nuclear mitotic apparatus protein 1	NUMA1
Q99613	Eukaryotic translation initiation factor 3 subunit C	EIF3C
Q96TA1	Niban-like protein 1	FAM129B
E9PK25	Cofilin-1	CFL1
P50552	Vasodilator-stimulated phosphoprotein	VASP
P12270	Nucleoprotein TPR	TPR
Q05639	Elongation factor 1-alpha 2	EEF1A2
P42224	Signal transducer and activator of transcription 1-alpha/beta	STAT1
P11413	Glucose-6-phosphate 1-dehydrogenase	G6PD
Q92973	Transportin-1	TNPO1
Q16891	MICOS complex subunit MIC60	IMMT
P33992	DNA replication licensing factor MCM5	MCM5
Q14566	DNA replication licensing factor MCM6	MCM6
O14617	AP-3 complex subunit delta-1	AP3D1
B2R5W2	Heterogeneous nuclear ribonucleoproteins C1/C2	HNRNPC
O60271	C-Jun-amino-terminal kinase-interacting protein 4	SPAG9
O43390	Heterogeneous nuclear ribonucleoprotein R	HNRNPR
G8JLD5	Dynamin-1-like protein	DNM1L
P08240	Signal recognition particle receptor subunit alpha	SRPRA
P07954	Fumarate hydratase, mitochondrial	FH
P55265	Double-stranded RNA-specific adenosine deaminase	ADAR
P61160	Actin-related protein 2	ACTR2
P51149	Ras-related protein Rab-7a	RAB7A
A5YKK6	CCR4-NOT transcription complex subunit 1	CNOT1
P14866	Heterogeneous nuclear ribonucleoprotein L	HNRNPL
Q9UBT2	SUMO-activating enzyme subunit 2	UBA2
Q06323	Proteasome activator complex subunit 1	PSME1
O75534	Cold shock domain-containing protein E1	CSDE1
P55884	Eukaryotic translation initiation factor 3 subunit B	EIF3B
Q15046	Lysine--tRNA ligase	KARS
P33991	DNA replication licensing factor MCM4	MCM4
P31040	Succinate dehydrogenase [ubiquinone] flavoprotein subunit, mitochondrial	SDHA
P15144	Aminopeptidase N	ANPEP
M0R0P8	Unconventional myosin-IXb	MYO9B
B1AK88	F-actin-capping protein subunit beta	CAPZB
P61221	ATP-binding cassette sub-family E member 1	ABCE1
P51659	Peroxisomal multifunctional enzyme type 2	HSD17B4
P04083	Annexin A1	ANXA1
P12081	Histidine--tRNA ligase, cytoplasmic	HARS
K7ELL7	Glucosidase 2 subunit beta	PRKCSH
A0A2R8Y5S7	Radixin	RDX
Q15365	Poly(rC)-binding protein 1	PCBP1
Q9Y262	Eukaryotic translation initiation factor 3 subunit L	EIF3L
Q92945	Far upstream element-binding protein 2	KHSRP
O00231	26S proteasome non-ATPase regulatory subunit 11	PSMD11
P17655	Calpain-2 catalytic subunit	CAPN2
P52907	F-actin-capping protein subunit alpha-1	CAPZA1
P39023	60S ribosomal protein L3	RPL3
P07737	Profilin-1	PFN1
Q9P258	Protein RCC2	RCC2
K7EK60	Formin-like protein 1	FMNL1
Q13423	NAD(P) transhydrogenase, mitochondrial	NNT
O15143	Actin-related protein 2/3 complex subunit 1B	ARPC1B
P30041	Peroxiredoxin-6	PRDX6
Q92888	Rho guanine nucleotide exchange factor 1	ARHGEF1
Q15437	Protein transport protein Sec23B	SEC23B
P09960	Leukotriene A-4 hydrolase	LTA4H
P31946	14-3-3 protein beta/alpha	YWHAB
Q08J23	tRNA (cytosine(34)-C(5))-methyltransferase	NSUN2
Q9NSE4	Isoleucine--tRNA ligase, mitochondrial	IARS2
P21281	V-type proton ATPase subunit B, brain isoform	ATP6V1B2
D6REX3	Protein transport protein Sec31A	SEC31A
O43252	Bifunctional 3'-phosphoadenosine 5'-phosphosulfate synthase 1	PAPSS1
Q01082	Spectrin beta chain, non-erythrocytic 1	SPTBN1
A0A0G2JN29	Nodal modulator 1	NOMO1
P15880	40S ribosomal protein S2	RPS2
P07602	Prosaposin	PSAP
Q13435	Splicing factor 3B subunit 2	SF3B2
A0A1B0GVU9	Glutamine--tRNA ligase (Fragment)	QARS
Q06830	Peroxiredoxin-1	PRDX1
Q5T5C7	Serine--tRNA ligase, cytoplasmic	SARS
P07384	Calpain-1 catalytic subunit	CAPN1
Q86UP2	Kinectin	KTN1
H0Y4R1	Inosine-5'-monophosphate dehydrogenase 2 (Fragment)	IMPDH2
P09972	Fructose-bisphosphate aldolase C	ALDOC
Q16666	Gamma-interferon-inducible protein 16	IFI16
Q9NQW7	Xaa-Pro aminopeptidase 1	XPNPEP1
A0AVT1	Ubiquitin-like modifier-activating enzyme 6	UBA6
Q9UHD8	Septin-9	SEPT9
C9J406	MICOS complex subunit MIC60	IMMT
P62136	Serine/threonine-protein phosphatase PP1-alpha catalytic subunit	PPP1CA
P35998	26S proteasome regulatory subunit 7	PSMC2
Q02790	Peptidyl-prolyl cis-trans isomerase FKBP4	FKBP4
P49321	Nuclear autoantigenic sperm protein	NASP
P50995	Annexin A11	ANXA11
O75165	DnaJ homolog subfamily C member 13	DNAJC13
P36222	Chitinase-3-like protein 1	CHI3L1
P35232	Prohibitin	PHB
Q9Y265	RuvB-like 1	RUVBL1
O00116	Alkyldihydroxyacetonephosphate synthase, peroxisomal	AGPS
H0Y5F5	Polyadenylate-binding protein (Fragment)	PABPC4
M0QZM1	Heterogeneous nuclear ribonucleoprotein M (Fragment)	HNRNPM
Q14669	E3 ubiquitin-protein ligase TRIP12	TRIP12
Q9BXP5	Serrate RNA effector molecule homolog	SRRT
Q7L1Q6	Basic leucine zipper and W2 domain-containing protein 1	BZW1
P26641	Elongation factor 1-gamma	EEF1G
Q9Y3F4	Serine-threonine kinase receptor-associated protein	STRAP
P78347	General transcription factor II-I	GTF2I
F8W6I7	Heterogeneous nuclear ribonucleoprotein A1	HNRNPA1
P62195	26S proteasome regulatory subunit 8	PSMC5
Q9Y230	RuvB-like 2	RUVBL2
P33993	DNA replication licensing factor MCM7	MCM7
P36578	60S ribosomal protein L4	RPL4
Q9Y696	Chloride intracellular channel protein 4	CLIC4
P19367	Hexokinase-1	HK1
Q9UQ80	Proliferation-associated protein 2G4	PA2G4
P35908	Keratin, type II cytoskeletal 2 epidermal	KRT2
P62937	Peptidyl-prolyl cis-trans isomerase A	PPIA
P09525	Annexin A4	ANXA4
Q9HAV4	Exportin-5	XPO5
E9PB90	Hexokinase-2	HK2
P20702	Integrin alpha-X	ITGAX
O95573	Long-chain-fatty-acid--CoA ligase 3	ACSL3
F8VZX2	Poly(rC)-binding protein 2	PCBP2
Q9H4M9	EH domain-containing protein 1	EHD1
F5GZS6	4F2 cell-surface antigen heavy chain	SLC3A2
P05198	Eukaryotic translation initiation factor 2 subunit 1	EIF2S1
P12109	Collagen alpha-1(VI) chain	COL6A1
P09104	Gamma-enolase	ENO2
Q15459	Splicing factor 3A subunit 1	SF3A1
O75874	Isocitrate dehydrogenase [NADP] cytoplasmic	IDH1
Q04446	1,4-alpha-glucan-branching enzyme	GBE1
Q99536	Synaptic vesicle membrane protein VAT-1 homolog	VAT1
P27695	DNA-(apurinic or apyrimidinic site) lyase	APEX1
P62873	Guanine nucleotide-binding protein G(I)/G(S)/G(T) subunit beta-1	GNB1
P30520	Adenylosuccinate synthetase isozyme 2	ADSS
O43592	Exportin-T	XPOT
Q92499	ATP-dependent RNA helicase DDX1	DDX1
P31943	Heterogeneous nuclear ribonucleoprotein H	HNRNPH1
E7EX90	Dynactin subunit 1	DCTN1
P27348	14-3-3 protein theta	YWHAQ
P51991	Heterogeneous nuclear ribonucleoprotein A3	HNRNPA3
O43776	Asparagine--tRNA ligase, cytoplasmic	NARS
P46063	ATP-dependent DNA helicase Q1	RECQL
Q5SW79	Centrosomal protein of 170 kDa	CEP170
P62495	Eukaryotic peptide chain release factor subunit 1	ETF1
P54819	Adenylate kinase 2, mitochondrial	AK2
Q92614	Unconventional myosin-XVIIIa	MYO18A
O75390	Citrate synthase, mitochondrial	CS
Q13838	Spliceosome RNA helicase DDX39B	DDX39B
O00754	Lysosomal alpha-mannosidase	MAN2B1
Q15942	Zyxin	ZYX
P20700	Lamin-B1	LMNB1
Q12931	Heat shock protein 75 kDa, mitochondrial	TRAP1
Q9UQ35	Serine/arginine repetitive matrix protein 2	SRRM2
O75844	CAAX prenyl protease 1 homolog	ZMPSTE24
Q15366	Poly(rC)-binding protein 2	PCBP2
P37837	Transaldolase	TALDO1
P52306	Rap1 GTPase-GDP dissociation stimulator 1	RAP1GDS1
Q99623	Prohibitin-2	PHB2
P13674	Prolyl 4-hydroxylase subunit alpha-1	P4HA1
P05556	Integrin beta-1	ITGB1
H0YIV4	Nucleosome assembly protein 1-like 1 (Fragment)	NAP1L1
P23246	Splicing factor, proline- and glutamine-rich	SFPQ
Q9Y613	FH1/FH2 domain-containing protein 1	FHOD1
P40925	Malate dehydrogenase, cytoplasmic	MDH1
P14598	Neutrophil cytosol factor 1	NCF1
Q9UI08	Ena/VASP-like protein	EVL
Q9Y266	Nuclear migration protein nudC	NUDC
P22695	Cytochrome b-c1 complex subunit 2, mitochondrial	UQCRC2
A0A087X188	Bridging integrator 2	BIN2
P36873	Serine/threonine-protein phosphatase PP1-gamma catalytic subunit	PPP1CC
P14550	Aldo-keto reductase family 1 member A1	AKR1A1
P15531	Nucleoside diphosphate kinase A	NME1
G3V3H3	Kinesin light chain 1	KLC1
Q9H4A4	Aminopeptidase B	RNPEP
P43686	26S proteasome regulatory subunit 6B	PSMC4
Q16822	Phosphoenolpyruvate carboxykinase [GTP], mitochondrial	PCK2
P45880	Voltage-dependent anion-selective channel protein 2	VDAC2
O00148	ATP-dependent RNA helicase DDX39A	DDX39A
P23526	Adenosylhomocysteinase	AHCY
Q00722	1-phosphatidylinositol 4,5-bisphosphate phosphodiesterase beta-2	PLCB2
O43747	AP-1 complex subunit gamma-1	AP1G1
Q7Z6Z7	E3 ubiquitin-protein ligase HUWE1	HUWE1
P31930	Cytochrome b-c1 complex subunit 1, mitochondrial	UQCRC1
O60313	Dynamin-like 120 kDa protein, mitochondrial	OPA1
P11387	DNA topoisomerase 1	TOP1
P56192	Methionine--tRNA ligase, cytoplasmic	MARS
P60228	Eukaryotic translation initiation factor 3 subunit E	EIF3E
P09622	Dihydrolipoyl dehydrogenase, mitochondrial	DLD
Q9Y5X3	Sorting nexin-5	SNX5
P35580	Myosin-10	MYH10
A0A087WWU8	Tropomyosin alpha-3 chain	TPM3
Q9NR30	Nucleolar RNA helicase 2	DDX21
P05388	60S acidic ribosomal protein P0	RPLP0
P41091	Eukaryotic translation initiation factor 2 subunit 3	EIF2S3
P53992	Protein transport protein Sec24C	SEC24C
Q8TEM1	Nuclear pore membrane glycoprotein 210	NUP210
Q9BY44	Eukaryotic translation initiation factor 2A	EIF2A
O60488	Long-chain-fatty-acid--CoA ligase 4	ACSL4
Q6NUK1	Calcium-binding mitochondrial carrier protein SCaMC-1	SLC25A24
Q14103	Heterogeneous nuclear ribonucleoprotein D0	HNRNPD
P62140	Serine/threonine-protein phosphatase PP1-beta catalytic subunit	PPP1CB
Q9NTJ5	Phosphatidylinositide phosphatase SAC1	SACM1L
P24752	Acetyl-CoA acetyltransferase, mitochondrial	ACAT1
A0A087X1Z3	Proteasome activator complex subunit 2	PSME2
Q9NUQ9	Protein FAM49B	FAM49B
Q16719	Kynureninase	KYNU
Q92896	Golgi apparatus protein 1	GLG1
O95202	Mitochondrial proton/calcium exchanger protein	LETM1
Q9NTK5	Obg-like ATPase 1	OLA1
Q9BUJ2	Heterogeneous nuclear ribonucleoprotein U-like protein 1	HNRNPUL1
B4DY09	cDNA FLJ51660, highly similar to Interleukin enhancer-binding factor 2	ILF2
P38919	Eukaryotic initiation factor 4A-III	EIF4A3
Q13618	Cullin-3	CUL3
P31150	Rab GDP dissociation inhibitor alpha	GDI1
Q99714	3-hydroxyacyl-CoA dehydrogenase type-2	HSD17B10
O00203	AP-3 complex subunit beta-1	AP3B1
O94973	AP-2 complex subunit alpha-2	AP2A2
Q13740	CD166 antigen	ALCAM
Q92900	Regulator of nonsense transcripts 1	UPF1
Q6IBS0	Twinfilin-2	TWF2
A0A087X2I1	26S proteasome regulatory subunit 10B	PSMC6
H7BXI1	Extended synaptotagmin-2 (Fragment)	ESYT2
P21964	Catechol O-methyltransferase	COMT
P62701	40S ribosomal protein S4, X isoform	RPS4X
Q15008	26S proteasome non-ATPase regulatory subunit 6	PSMD6
E9PKG1	Protein arginine N-methyltransferase 1	PRMT1
Q16643	Drebrin	DBN1
Q9HD20	Manganese-transporting ATPase 13A1	ATP13A1
P55010	Eukaryotic translation initiation factor 5	EIF5
Q96AG4	Leucine-rich repeat-containing protein 59	LRRC59
P15498	Proto-oncogene vav	VAV1
Q14258	E3 ubiquitin/ISG15 ligase TRIM25	TRIM25
Q8N163	Cell cycle and apoptosis regulator protein 2	CCAR2
P23284	Peptidyl-prolyl cis-trans isomerase B	PPIB
Q09161	Nuclear cap-binding protein subunit 1	NCBP1
Q5JVZ5	Engulfment and cell motility protein 2	ELMO2
Q99615	DnaJ homolog subfamily C member 7	DNAJC7
P55084	Trifunctional enzyme subunit beta, mitochondrial	HADHB
P35527	Keratin, type I cytoskeletal 9	KRT9
O43852	Calumenin	CALU
P01892	HLA class I histocompatibility antigen, A-2 alpha chain	HLA-A
O60701	UDP-glucose 6-dehydrogenase	UGDH
P48960	CD97 antigen	CD97
Q9UNM6	26S proteasome non-ATPase regulatory subunit 13	PSMD13
P30084	Enoyl-CoA hydratase, mitochondrial	ECHS1
P00966	Argininosuccinate synthase	ASS1
P40121	Macrophage-capping protein	CAPG
P12277	Creatine kinase B-type	CKB
P62191	26S proteasome regulatory subunit 4	PSMC1
Q86UE4	Protein LYRIC	MTDH
Q9BZF1	Oxysterol-binding protein-related protein 8	OSBPL8
J3KN16	Proteasome adapter and scaffold protein ECM29	ECPAS
O15067	Phosphoribosylformylglycinamidine synthase	PFAS
P52565	Rho GDP-dissociation inhibitor 1	ARHGDIA
Q9Y3L3	SH3 domain-binding protein 1	SH3BP1
Q13011	Delta(3,5)-Delta(2,4)-dienoyl-CoA isomerase, mitochondrial	ECH1
P09429	High mobility group protein B1	HMGB1
Q9H223	EH domain-containing protein 4	EHD4
P39656	Dolichyl-diphosphooligosaccharide--protein glycosyltransferase 48 kDa subunit	DDOST
Q04917	14-3-3 protein eta	YWHAH
P16885	1-phosphatidylinositol 4,5-bisphosphate phosphodiesterase gamma-2	PLCG2
P84077	ADP-ribosylation factor 1	ARF1
J3KN67	Tropomyosin alpha-3 chain	TPM3
A0A0C4DGB5	Calpastatin	CAST
A0A1B0GTJ7	Adenylosuccinate lyase	ADSL
Q7L2H7	Eukaryotic translation initiation factor 3 subunit M	EIF3M
Q9BXJ9	N-alpha-acetyltransferase 15, NatA auxiliary subunit	NAA15
Q02878	60S ribosomal protein L6	RPL6
P21266	Glutathione S-transferase Mu 3	GSTM3
P25786	Proteasome subunit alpha type-1	PSMA1
Q9UBE0	SUMO-activating enzyme subunit 1	SAE1
P23219	Prostaglandin G/H synthase 1	PTGS1
Q16181	Septin-7	SEPT7
E7EX17	Eukaryotic translation initiation factor 4B	EIF4B
Q05655	Protein kinase C delta type	PRKCD
P34931	Heat shock 70 kDa protein 1-like	HSPA1L
F8VV59	Nucleosome assembly protein 1-like 1	NAP1L1
O14818	Proteasome subunit alpha type-7	PSMA7
E7EUC7	UTP--glucose-1-phosphate uridylyltransferase	UGP2
P09543	2',3'-cyclic-nucleotide 3'-phosphodiesterase	CNP
P54920	Alpha-soluble NSF attachment protein	NAPA
G3V180	Dipeptidyl peptidase 3	DPP3
Q14012	Calcium/calmodulin-dependent protein kinase type 1	CAMK1
O00629	Importin subunit alpha-3	KPNA4
P01023	Alpha-2-macroglobulin	A2M
P07858	Cathepsin B	CTSB
O15371	Eukaryotic translation initiation factor 3 subunit D	EIF3D
Q13617	Cullin-2	CUL2
P78417	Glutathione S-transferase omega-1	GSTO1
P23396	40S ribosomal protein S3	RPS3
Q562R1	Beta-actin-like protein 2	ACTBL2
Q14683	Structural maintenance of chromosomes protein 1A	SMC1A
P19971	Thymidine phosphorylase	TYMP
P46777	60S ribosomal protein L5	RPL5
Q96AE4	Far upstream element-binding protein 1	FUBP1
Q8N1F7	Nuclear pore complex protein Nup93	NUP93
Q96RQ9	L-amino-acid oxidase	IL4I1
Q08945	FACT complex subunit SSRP1	SSRP1
Q66K74	Microtubule-associated protein 1S	MAP1S
P08648	Integrin alpha-5	ITGA5
P00387	NADH-cytochrome b5 reductase 3	CYB5R3
Q9BWD1	Acetyl-CoA acetyltransferase, cytosolic	ACAT2
P23368	NAD-dependent malic enzyme, mitochondrial	ME2
P42765	3-ketoacyl-CoA thiolase, mitochondrial	ACAA2
P31689	DnaJ homolog subfamily A member 1	DNAJA1
Q12907	Vesicular integral-membrane protein VIP36	LMAN2
P43490	Nicotinamide phosphoribosyltransferase	NAMPT
Q16543	Hsp90 co-chaperone Cdc37	CDC37
P51148	Ras-related protein Rab-5C	RAB5C
P32969	60S ribosomal protein L9	RPL9
Q9Y4E8	Ubiquitin carboxyl-terminal hydrolase 15	USP15
Q9Y617	Phosphoserine aminotransferase	PSAT1
Q9H2U2	Inorganic pyrophosphatase 2, mitochondrial	PPA2
Q9H845	Acyl-CoA dehydrogenase family member 9, mitochondrial	ACAD9
P50502	Hsc70-interacting protein	ST13
F8W809	Thioredoxin reductase 1, cytoplasmic	TXNRD1
P08575	Receptor-type tyrosine-protein phosphatase C	PTPRC
P46977	Dolichyl-diphosphooligosaccharide--protein glycosyltransferase subunit STT3A	STT3A
P12236	ADP/ATP translocase 3	SLC25A6
Q9BT78	COP9 signalosome complex subunit 4	COPS4
Q5T0I0	Gelsolin (Fragment)	GSN
Q9UGP8	Translocation protein SEC63 homolog	SEC63
Q9HB71	Calcyclin-binding protein	CACYBP
Q9NSD9	Phenylalanine--tRNA ligase beta subunit	FARSB
O00232	26S proteasome non-ATPase regulatory subunit 12	PSMD12
A0A2R8Y5V9	Tropomyosin alpha-4 chain	TPM4
O60749	Sorting nexin-2	SNX2
Q93009	Ubiquitin carboxyl-terminal hydrolase 7	USP7
P20591	Interferon-induced GTP-binding protein Mx1	MX1
P49589	Cysteine--tRNA ligase, cytoplasmic	CARS
F8W726	Ubiquitin-associated protein 2-like	UBAP2L
P61586	Transforming protein RhoA	RHOA
P60900	Proteasome subunit alpha type-6	PSMA6
Q9ULV4	Coronin-1C	CORO1C
Q99733	Nucleosome assembly protein 1-like 4	NAP1L4
P62879	Guanine nucleotide-binding protein G(I)/G(S)/G(T) subunit beta-2	GNB2
P20042	Eukaryotic translation initiation factor 2 subunit 2	EIF2S2
Q96HE7	ERO1-like protein alpha	ERO1A
P61106	Ras-related protein Rab-14	RAB14
P42167	Lamina-associated polypeptide 2, isoforms beta/gamma	TMPO
Q14315	Filamin-C	FLNC
Q5SX86	Rab GDP dissociation inhibitor (Fragment)	GDI2
Q9NU22	Midasin	MDN1
P13861	cAMP-dependent protein kinase type II-alpha regulatory subunit	PRKAR2A
Q07954	Prolow-density lipoprotein receptor-related protein 1	LRP1
Q9Y3I0	tRNA-splicing ligase RtcB homolog	RTCB
A0A0C4DG89	Probable ATP-dependent RNA helicase DDX46	DDX46
P11172	Uridine 5'-monophosphate synthase	UMPS
P42858	Huntingtin	HTT
P55263	Adenosine kinase	ADK
O00764	Pyridoxal kinase	PDXK
Q8WVM8	Sec1 family domain-containing protein 1	SCFD1
Q9UKW4	Guanine nucleotide exchange factor VAV3	VAV3
P67936	Tropomyosin alpha-4 chain	TPM4
Q8N392	Rho GTPase-activating protein 18	ARHGAP18
P08865	40S ribosomal protein SA	RPSA
O95782	AP-2 complex subunit alpha-1	AP2A1
Q99497	Protein/nucleic acid deglycase DJ-1	PARK7
K7ER00	Phenylalanine--tRNA ligase alpha subunit	FARSA
G8JLA2	Myosin light polypeptide 6	MYL6
H0YA96	Heterogeneous nuclear ribonucleoprotein D0 (Fragment)	HNRNPD
P08754	Guanine nucleotide-binding protein G(k) subunit alpha	GNAI3
Q27J81	Inverted formin-2	INF2
Q14847	LIM and SH3 domain protein 1	LASP1
Q96RP9	Elongation factor G, mitochondrial	GFM1
Q9H0D6	5'-3' exoribonuclease 2	XRN2
Q15019	Septin-2	SEPT2
P29692	Elongation factor 1-delta	EEF1D
P42166	Lamina-associated polypeptide 2, isoform alpha	TMPO
O14950	Myosin regulatory light chain 12B	MYL12B
P09211	Glutathione S-transferase P	GSTP1
Q9Y5M8	Signal recognition particle receptor subunit beta	SRPRB
P10768	S-formylglutathione hydrolase	ESD
Q13867	Bleomycin hydrolase	BLMH
A0A3F2YNW8	Inositol 1,4,5-trisphosphate receptor type 1	ITPR1
P49257	Protein ERGIC-53	LMAN1
O60264	SWI/SNF-related matrix-associated actin-dependent regulator of chromatin subfamily A member 5	SMARCA5
Q5T4U5	Acyl-Coenzyme A dehydrogenase, C-4 to C-12 straight chain, isoform CRA_a	ACADM
P30419	Glycylpeptide N-tetradecanoyltransferase 1	NMT1
P62424	60S ribosomal protein L7a	RPL7A
P83111	Serine beta-lactamase-like protein LACTB, mitochondrial	LACTB
Q7L014	Probable ATP-dependent RNA helicase DDX46	DDX46
Q9BZZ5	Apoptosis inhibitor 5	API5
P18124	60S ribosomal protein L7	RPL7
P23786	Carnitine O-palmitoyltransferase 2, mitochondrial	CPT2
Q9UNF0	Protein kinase C and casein kinase substrate in neurons protein 2	PACSIN2
P08567	Pleckstrin	PLEK
P31153	S-adenosylmethionine synthase isoform type-2	MAT2A
Q92922	SWI/SNF complex subunit SMARCC1	SMARCC1
P46060	Ran GTPase-activating protein 1	RANGAP1
Q8TAQ2	SWI/SNF complex subunit SMARCC2	SMARCC2
O94776	Metastasis-associated protein MTA2	MTA2
P62906	60S ribosomal protein L10a	RPL10A
B3KS98	Eukaryotic translation initiation factor 3 subunit H	EIF3H
P12004	Proliferating cell nuclear antigen	PCNA
Q14764	Major vault protein	MVP
O60361	Putative nucleoside diphosphate kinase	NME2P1
A0A286YFF7	Palmitoyl-protein thioesterase 1	PPT1
P20618	Proteasome subunit beta type-1	PSMB1
Q5TA02	Glutathione S-transferase omega-1 (Fragment)	GSTO1
P15121	Aldose reductase	AKR1B1
P13798	Acylamino-acid-releasing enzyme	APEH
Q15181	Inorganic pyrophosphatase	PPA1
B1AKJ5	Nardilysin	NRDC
P05362	Intercellular adhesion molecule 1	ICAM1
Q6P2E9	Enhancer of mRNA-decapping protein 4	EDC4
P49189	4-trimethylaminobutyraldehyde dehydrogenase	ALDH9A1
H3BNC9	Uncharacterized protein
P22090	40S ribosomal protein S4, Y isoform 1	RPS4Y1
Q9H2M9	Rab3 GTPase-activating protein non-catalytic subunit	RAB3GAP2
P26196	Probable ATP-dependent RNA helicase DDX6	DDX6
P11498	Pyruvate carboxylase, mitochondrial	PC
P00918	Carbonic anhydrase 2	CA2
P48739	Phosphatidylinositol transfer protein beta isoform	PITPNB
Q96C19	EF-hand domain-containing protein D2	EFHD2
Q8NC51	Plasminogen activator inhibitor 1 RNA-binding protein	SERBP1
Q07960	Rho GTPase-activating protein 1	ARHGAP1
Q96A33	Coiled-coil domain-containing protein 47	CCDC47
G3V1V0	Myosin light polypeptide 6	MYL6
P09382	Galectin-1	LGALS1
Q00653	Nuclear factor NF-kappa-B p100 subunit	NFKB2
P13929	Beta-enolase	ENO3
Q9NTI5	Sister chromatid cohesion protein PDS5 homolog B	PDS5B
O75694	Nuclear pore complex protein Nup155	NUP155
P30740	Leukocyte elastase inhibitor	SERPINB1
P30048	Thioredoxin-dependent peroxide reductase, mitochondrial	PRDX3
P05091	Aldehyde dehydrogenase, mitochondrial	ALDH2
P02649	Apolipoprotein E	APOE
Q8NBS9	Thioredoxin domain-containing protein 5	TXNDC5
P42285	Exosome RNA helicase MTR4	MTREX
Q15691	Microtubule-associated protein RP/EB family member 1	MAPRE1
Q9Y5X1	Sorting nexin-9	SNX9
Q13347	Eukaryotic translation initiation factor 3 subunit I	EIF3I
Q15833	Syntaxin-binding protein 2	STXBP2
Q96P70	Importin-9	IPO9
Q9Y376	Calcium-binding protein 39	CAB39
Q13596	Sorting nexin-1	SNX1
P20073	Annexin A7	ANXA7
P62834	Ras-related protein Rap-1A	RAP1A
Q16831	Uridine phosphorylase 1	UPP1
P61224	Ras-related protein Rap-1b	RAP1B
P25789	Proteasome subunit alpha type-4	PSMA4
Q13428	Treacle protein	TCOF1
P61247	40S ribosomal protein S3a	RPS3A
Q8WU79	Stromal membrane-associated protein 2	SMAP2
Q9UBB4	Ataxin-10	ATXN10
Q13409	Cytoplasmic dynein 1 intermediate chain 2	DYNC1I2
P05141	ADP/ATP translocase 2	SLC25A5
Q13561	Dynactin subunit 2	DCTN2
P18085	ADP-ribosylation factor 4	ARF4
D6RER5	Septin-11	SEPT11
P51665	26S proteasome non-ATPase regulatory subunit 7	PSMD7
A0A0A0MSK5	Torsin-1A-interacting protein 1	TOR1AIP1
P50281	Matrix metalloproteinase-14	MMP14
P30085	UMP-CMP kinase	CMPK1
P05534	HLA class I histocompatibility antigen, A-24 alpha chain	HLA-A
P30040	Endoplasmic reticulum resident protein 29	ERP29
P56537	Eukaryotic translation initiation factor 6	EIF6
P61011	Signal recognition particle 54 kDa protein	SRP54
Q9UJU6	Drebrin-like protein	DBNL
P24539	ATP synthase F(0) complex subunit B1, mitochondrial	ATP5PB
K7EJH8	Alpha-actinin-4 (Fragment)	ACTN4
O94925	Glutaminase kidney isoform, mitochondrial	GLS
Q14289	Protein-tyrosine kinase 2-beta	PTK2B
P61201	COP9 signalosome complex subunit 2	COPS2
O14744	Protein arginine N-methyltransferase 5	PRMT5
Q5TCU3	Tropomyosin beta chain	TPM2
P13804	Electron transfer flavoprotein subunit alpha, mitochondrial	ETFA
P46821	Microtubule-associated protein 1B	MAP1B
Q8N1G4	Leucine-rich repeat-containing protein 47	LRRC47
O00267	Transcription elongation factor SPT5	SUPT5H
Q6PKG0	La-related protein 1	LARP1
Q9H0U4	Ras-related protein Rab-1B	RAB1B
O96019	Actin-like protein 6A	ACTL6A
Q13501	Sequestosome-1	SQSTM1
Q92619	Rho GTPase-activating protein 45	ARHGAP45
P33121	Long-chain-fatty-acid--CoA ligase 1	ACSL1
P00505	Aspartate aminotransferase, mitochondrial	GOT2
Q32P51	Heterogeneous nuclear ribonucleoprotein A1-like 2	HNRNPA1L2
Q5W0H4	Translationally-controlled tumor protein	TPT1
Q9UMS4	Pre-mRNA-processing factor 19	PRPF19
Q13451	Peptidyl-prolyl cis-trans isomerase FKBP5	FKBP5
P16152	Carbonyl reductase [NADPH] 1	CBR1
Q14344	Guanine nucleotide-binding protein subunit alpha-13	GNA13
P67775	Serine/threonine-protein phosphatase 2A catalytic subunit alpha isoform	PPP2CA
Q14568	Heat shock protein HSP 90-alpha A2	HSP90AA2P
P48637	Glutathione synthetase	GSS
P62081	40S ribosomal protein S7	RPS7
Q709C8	Vacuolar protein sorting-associated protein 13C	VPS13C
Q9Y520	Protein PRRC2C	PRRC2C
Q9Y6M1	Insulin-like growth factor 2 mRNA-binding protein 2	IGF2BP2
B0QZ18	Copine-1	CPNE1
Q09028	Histone-binding protein RBBP4	RBBP4
O43488	Aflatoxin B1 aldehyde reductase member 2	AKR7A2
P20936	Ras GTPase-activating protein 1	RASA1
Q03405	Urokinase plasminogen activator surface receptor	PLAUR
Q07065	Cytoskeleton-associated protein 4	CKAP4
P43034	Platelet-activating factor acetylhydrolase IB subunit alpha	PAFAH1B1
P15170	Eukaryotic peptide chain release factor GTP-binding subunit ERF3A	GSPT1
Q07021	Complement component 1 Q subcomponent-binding protein, mitochondrial	C1QBP
P62820	Ras-related protein Rab-1A	RAB1A
P48681	Nestin	NES
Q13283	Ras GTPase-activating protein-binding protein 1	G3BP1
H0Y7A7	Calmodulin-2 (Fragment)	CALM2
Q01581	Hydroxymethylglutaryl-CoA synthase, cytoplasmic	HMGCS1
O60568	Multifunctional procollagen lysine hydroxylase and glycosyltransferase LH3	PLOD3
F6TLX2	Glyoxalase domain-containing protein 4	GLOD4
P16435	NADPH--cytochrome P450 reductase	POR
P80723	Brain acid soluble protein 1	BASP1
A0A1W2PPT5	DNA-directed RNA polymerase subunit beta	POLR2B
P52597	Heterogeneous nuclear ribonucleoprotein F	HNRNPF
Q5JR08	Rho-related GTP-binding protein RhoC (Fragment)	RHOC
Q9NVJ2	ADP-ribosylation factor-like protein 8B	ARL8B
Q8WWM7	Ataxin-2-like protein	ATXN2L
Q9NR12	PDZ and LIM domain protein 7	PDLIM7
P41240	Tyrosine-protein kinase CSK	CSK
P04792	Heat shock protein beta-1	HSPB1
Q9HCC0	Methylcrotonoyl-CoA carboxylase beta chain, mitochondrial	MCCC2
P60953	Cell division control protein 42 homolog	CDC42
P26368	Splicing factor U2AF 65 kDa subunit	U2AF2
Q5JTZ9	Alanine--tRNA ligase, mitochondrial	AARS2
P61163	Alpha-centractin	ACTR1A
H0YDU8	Serine/threonine-protein phosphatase (Fragment)	PPP5C
Q01432	AMP deaminase 3	AMPD3
Q14699	Raftlin	RFTN1
Q15042	Rab3 GTPase-activating protein catalytic subunit	RAB3GAP1
Q7Z2K6	Endoplasmic reticulum metallopeptidase 1	ERMP1
P40763	Signal transducer and activator of transcription 3	STAT3
B0I1T2	Unconventional myosin-Ig	MYO1G
Q9NTX5	Ethylmalonyl-CoA decarboxylase	ECHDC1
P39748	Flap endonuclease 1	FEN1
P62241	40S ribosomal protein S8	RPS8
P10155	60 kDa SS-A/Ro ribonucleoprotein	TROVE2
Q9BS26	Endoplasmic reticulum resident protein 44	ERP44
Q15435	Protein phosphatase 1 regulatory subunit 7	PPP1R7
Q8NE71	ATP-binding cassette sub-family F member 1	ABCF1
P04632	Calpain small subunit 1	CAPNS1
Q9NYL9	Tropomodulin-3	TMOD3
Q13547	Histone deacetylase 1	HDAC1
P51532	Transcription activator BRG1	SMARCA4
P62714	Serine/threonine-protein phosphatase 2A catalytic subunit beta isoform	PPP2CB
Q9UMR2	ATP-dependent RNA helicase DDX19B	DDX19B
Q5JTH9	RRP12-like protein	RRP12
B4DDD6	cDNA FLJ59450, highly similar to Drebrin-like protein	DBNL
P20290	Transcription factor BTF3	BTF3
P61289	Proteasome activator complex subunit 3	PSME3
P24844	Myosin regulatory light polypeptide 9	MYL9
H0Y5F3	Filamin-A (Fragment)	FLNA
A0A0A0MT60	Peptidylprolyl isomerase (Fragment)	FKBP15
P28066	Proteasome subunit alpha type-5	PSMA5
O95433	Activator of 90 kDa heat shock protein ATPase homolog 1	AHSA1
Q15404	Ras suppressor protein 1	RSU1
Q86XP3	ATP-dependent RNA helicase DDX42	DDX42
Q96CS3	FAS-associated factor 2	FAF2
Q13085	Acetyl-CoA carboxylase 1	ACACA
P46926	Glucosamine-6-phosphate isomerase 1	GNPDA1
P19623	Spermidine synthase	SRM
Q53GQ0	Very-long-chain 3-oxoacyl-CoA reductase	HSD17B12
P36871	Phosphoglucomutase-1	PGM1
A5A3E0	POTE ankyrin domain family member F	POTEF
Q13155	Aminoacyl tRNA synthase complex-interacting multifunctional protein 2	AIMP2
Q8TD55	Pleckstrin homology domain-containing family O member 2	PLEKHO2
Q9UNZ2	NSFL1 cofactor p47	NSFL1C
I3L3Q4	Glyoxalase domain-containing protein 4 (Fragment)	GLOD4
M0R0F0	40S ribosomal protein S5 (Fragment)	RPS5
O15355	Protein phosphatase 1G	PPM1G
Q04760	Lactoylglutathione lyase	GLO1
Q14166	Tubulin--tyrosine ligase-like protein 12	TTLL12
Q9BYT8	Neurolysin, mitochondrial	NLN
Q9Y295	Developmentally-regulated GTP-binding protein 1	DRG1
O43615	Mitochondrial import inner membrane translocase subunit TIM44	TIMM44
Q6XQN6	Nicotinate phosphoribosyltransferase	NAPRT
P09467	Fructose-1,6-bisphosphatase 1	FBP1
Q13107	Ubiquitin carboxyl-terminal hydrolase 4	USP4
Q8WXF1	Paraspeckle component 1	PSPC1
P10515	Dihydrolipoyllysine-residue acetyltransferase component of pyruvate dehydrogenase complex, mitochondrial	DLAT
O00442	RNA 3'-terminal phosphate cyclase	RTCA
P18031	Tyrosine-protein phosphatase non-receptor type 1	PTPN1
Q9NQC3	Reticulon-4	RTN4
Q03518	Antigen peptide transporter 1	TAP1
P37235	Hippocalcin-like protein 1	HPCAL1
Q8WUM0	Nuclear pore complex protein Nup133	NUP133
O14929	Histone acetyltransferase type B catalytic subunit	HAT1
P05387	60S acidic ribosomal protein P2	RPLP2
P36542	ATP synthase subunit gamma, mitochondrial	ATP5F1C
Q9Y6Y8	SEC23-interacting protein	SEC23IP
Q14498	RNA-binding protein 39	RBM39
A0A1W2PNX8	Protein unc-45 homolog A	UNC45A
B5MDF5	GTP-binding nuclear protein Ran	RAN
A7XZE4	Beta tropomyosin isoform	TPM2
P27694	Replication protein A 70 kDa DNA-binding subunit	RPA1
P55036	26S proteasome non-ATPase regulatory subunit 4	PSMD4
Q15075	Early endosome antigen 1	EEA1
Q29RF7	Sister chromatid cohesion protein PDS5 homolog A	PDS5A
O43399	Tumor protein D54	TPD52L2
Q15020	Squamous cell carcinoma antigen recognized by T-cells 3	SART3
P52294	Importin subunit alpha-5	KPNA1
O14979	Heterogeneous nuclear ribonucleoprotein D-like	HNRNPDL
F6QDS0	HCG2043426, isoform CRA_b	hCG_2043426
Q9BR76	Coronin-1B	CORO1B
Q70J99	Protein unc-13 homolog D	UNC13D
Q5SSJ5	Heterochromatin protein 1-binding protein 3	HP1BP3
P11766	Alcohol dehydrogenase class-3	ADH5
Q9ULZ3	Apoptosis-associated speck-like protein containing a CARD	PYCARD
P30044	Peroxiredoxin-5, mitochondrial	PRDX5
P38159	RNA-binding motif protein, X chromosome	RBMX
Q15233	Non-POU domain-containing octamer-binding protein	NONO
Q9BTT0	Acidic leucine-rich nuclear phosphoprotein 32 family member E	ANP32E
Q16512	Serine/threonine-protein kinase N1	PKN1
F8VVM2	Phosphate carrier protein, mitochondrial	SLC25A3
Q9BXS5	AP-1 complex subunit mu-1	AP1M1
P41218	Myeloid cell nuclear differentiation antigen	MNDA
Q96I24	Far upstream element-binding protein 3	FUBP3
Q9Y277	Voltage-dependent anion-selective channel protein 3	VDAC3
Q13492	Phosphatidylinositol-binding clathrin assembly protein	PICALM
O43684	Mitotic checkpoint protein BUB3	BUB3
O00487	26S proteasome non-ATPase regulatory subunit 14	PSMD14
P27635	60S ribosomal protein L10	RPL10
Q15907	Ras-related protein Rab-11B	RAB11B
B4DDF4	Calponin	CNN2
P28070	Proteasome subunit beta type-4	PSMB4
P07741	Adenine phosphoribosyltransferase	APRT
F8W914	Reticulon	RTN4
Q15424	Scaffold attachment factor B1	SAFB
P07686	Beta-hexosaminidase subunit beta	HEXB
Q86TX2	Acyl-coenzyme A thioesterase 1	ACOT1
P39687	Acidic leucine-rich nuclear phosphoprotein 32 family member A	ANP32A
A0A1P0AYU5	Sideroflexin	SFXN3
P16278	Beta-galactosidase	GLB1
P30050	60S ribosomal protein L12	RPL12
P62917	60S ribosomal protein L8	RPL8
Q9Y6G9	Cytoplasmic dynein 1 light intermediate chain 1	DYNC1LI1
Q9UJZ1	Stomatin-like protein 2, mitochondrial	STOML2
O96008	Mitochondrial import receptor subunit TOM40 homolog	TOMM40
Q96T76	MMS19 nucleotide excision repair protein homolog	MMS19
P62993	Growth factor receptor-bound protein 2	GRB2
A0A0J9YVP6	Poly(U)-binding-splicing factor PUF60 (Fragment)	PUF60
O60784	Target of Myb protein 1	TOM1
Q9BQG0	Myb-binding protein 1A	MYBBP1A
Q96T51	RUN and FYVE domain-containing protein 1	RUFY1
P41226	Ubiquitin-like modifier-activating enzyme 7	UBA7
O00425	Insulin-like growth factor 2 mRNA-binding protein 3	IGF2BP3
A0A1W2PNW1	Signal transducer and activator of transcription	STAT6
P61020	Ras-related protein Rab-5B	RAB5B
J3KTL2	Serine/arginine-rich-splicing factor 1	SRSF1
Q9Y2Z0	Protein SGT1 homolog	SUGT1
P61026	Ras-related protein Rab-10	RAB10
P61313	60S ribosomal protein L15	RPL15
Q96P48	Arf-GAP with Rho-GAP domain, ANK repeat and PH domain-containing protein 1	ARAP1
P47755	F-actin-capping protein subunit alpha-2	CAPZA2
P35613	Basigin	BSG
F8VZJ2	Nascent polypeptide-associated complex subunit alpha	NACA
O75822	Eukaryotic translation initiation factor 3 subunit J	EIF3J
Q12904	Aminoacyl tRNA synthase complex-interacting multifunctional protein 1	AIMP1
Q9H1E3	Nuclear ubiquitous casein and cyclin-dependent kinase substrate 1	NUCKS1
E7EQL5	Cytoplasmic dynein 1 intermediate chain 2 (Fragment)	DYNC1I2
P50213	Isocitrate dehydrogenase [NAD] subunit alpha, mitochondrial	IDH3A
A0A2R8YEK8	Collagen type IV alpha-3-binding protein	COL4A3BP
P35637	RNA-binding protein FUS	FUS
H0Y2W2	ATPase family AAA domain-containing protein 3A (Fragment)	ATAD3A
P04179	Superoxide dismutase [Mn], mitochondrial	SOD2
P25788	Proteasome subunit alpha type-3	PSMA3
A0A096LPI6	Uncharacterized protein (Fragment)
P21291	Cysteine and glycine-rich protein 1	CSRP1
O95861	3'(2'),5'-bisphosphate nucleotidase 1	BPNT1
P62753	40S ribosomal protein S6	RPS6
E7ESC6	Exportin-7	XPO7
P21283	V-type proton ATPase subunit C 1	ATP6V1C1
P62491	Ras-related protein Rab-11A	RAB11A
P20339	Ras-related protein Rab-5A	RAB5A
P00441	Superoxide dismutase [Cu-Zn]	SOD1
Q13148	TAR DNA-binding protein 43	TARDBP
Q9Y371	Endophilin-B1	SH3GLB1
P30466	HLA class I histocompatibility antigen, B-18 alpha chain	HLA-B
P84085	ADP-ribosylation factor 5	ARF5
Q99598	Translin-associated protein X	TSNAX
P24534	Elongation factor 1-beta	EEF1B2
O94906	Pre-mRNA-processing factor 6	PRPF6
P06865	Beta-hexosaminidase subunit alpha	HEXA
O60884	DnaJ homolog subfamily A member 2	DNAJA2
P51572	B-cell receptor-associated protein 31	BCAP31
O43865	S-adenosylhomocysteine hydrolase-like protein 1	AHCYL1
P55809	Succinyl-CoA:3-ketoacid coenzyme A transferase 1, mitochondrial	OXCT1
Q92597	Protein NDRG1	NDRG1
O75489	NADH dehydrogenase [ubiquinone] iron-sulfur protein 3, mitochondrial	NDUFS3
P11177	Pyruvate dehydrogenase E1 component subunit beta, mitochondrial	PDHB
Q6Y7W6	GRB10-interacting GYF protein 2	GIGYF2
Q9UL25	Ras-related protein Rab-21	RAB21
P62841	40S ribosomal protein S15	RPS15
P30495	HLA class I histocompatibility antigen, B-56 alpha chain	HLA-B
P84095	Rho-related GTP-binding protein RhoG	RHOG
Q13619	Cullin-4A	CUL4A
H3BQZ7	HCG2044799	HNRNPUL2-BSCL2
O75663	TIP41-like protein	TIPRL
O60684	Importin subunit alpha-7	KPNA6
Q9HDC9	Adipocyte plasma membrane-associated protein	APMAP
G3V0E4	Mitochondrial-processing peptidase subunit beta	PMPCB
Q96RQ3	Methylcrotonoyl-CoA carboxylase subunit alpha, mitochondrial	MCCC1
Q12979	Active breakpoint cluster region-related protein	ABR
Q8TBC4	NEDD8-activating enzyme E1 catalytic subunit	UBA3
I3L397	Eukaryotic translation initiation factor 5A (Fragment)	EIF5A
Q01433	AMP deaminase 2	AMPD2
Q13098	COP9 signalosome complex subunit 1	GPS1
P54886	Delta-1-pyrroline-5-carboxylate synthase	ALDH18A1
Q9H9B4	Sideroflexin-1	SFXN1
P11217	Glycogen phosphorylase, muscle form	PYGM
Q16698	2,4-dienoyl-CoA reductase, mitochondrial	DECR1
Q92688	Acidic leucine-rich nuclear phosphoprotein 32 family member B	ANP32B
Q16795	NADH dehydrogenase [ubiquinone] 1 alpha subcomplex subunit 9, mitochondrial	NDUFA9
Q9P2R3	Rabankyrin-5	ANKFY1
Q9HAV0	Guanine nucleotide-binding protein subunit beta-4	GNB4
P49755	Transmembrane emp24 domain-containing protein 10	TMED10
P06756	Integrin alpha-V	ITGAV
P51610	Host cell factor 1	HCFC1
O76003	Glutaredoxin-3	GLRX3
P55795	Heterogeneous nuclear ribonucleoprotein H2	HNRNPH2
Q9UKV3	Apoptotic chromatin condensation inducer in the nucleus	ACIN1
Q9H4E7	Differentially expressed in FDCP 6 homolog	DEF6
Q02543	60S ribosomal protein L18a	RPL18A
Q9H993	Protein-glutamate O-methyltransferase	ARMT1
A0A0D9SGG1	Lymphocyte cytosolic protein 2 (SH2 domain containing leukocyte protein of 76kDa), isoform CRA_c	LCP2
Q8TCS8	Polyribonucleotide nucleotidyltransferase 1, mitochondrial	PNPT1
P16930	Fumarylacetoacetase	FAH
Q9NR31	GTP-binding protein SAR1a	SAR1A
Q08AM6	Protein VAC14 homolog	VAC14
A0A0U1RQL8	Gelsolin (Fragment)	GSN
Q8TCJ2	Dolichyl-diphosphooligosaccharide--protein glycosyltransferase subunit STT3B	STT3B
Q01105	Protein SET	SET
K7ER96	Thioredoxin-like protein 1 (Fragment)	TXNL1
P08559	Pyruvate dehydrogenase E1 component subunit alpha, somatic form, mitochondrial	PDHA1
P26010	Integrin beta-7	ITGB7
H7C2N1	Prothymosin alpha (Fragment)	PTMA
Q9Y2L1	Exosome complex exonuclease RRP44	DIS3
Q9Y263	Phospholipase A-2-activating protein	PLAA
Q9H3S7	Tyrosine-protein phosphatase non-receptor type 23	PTPN23
D6RB85	Calnexin (Fragment)	CANX
O00178	GTP-binding protein 1	GTPBP1
Q92930	Ras-related protein Rab-8B	RAB8B
Q9NQR4	Omega-amidase NIT2	NIT2
Q14444	Caprin-1	CAPRIN1
Q05209	Tyrosine-protein phosphatase non-receptor type 12	PTPN12
P28482	Mitogen-activated protein kinase 1	MAPK1
P25787	Proteasome subunit alpha type-2	PSMA2
Q10471	Polypeptide N-acetylgalactosaminyltransferase 2	GALNT2
Q8NBQ5	Estradiol 17-beta-dehydrogenase 11	HSD17B11
Q14008	Cytoskeleton-associated protein 5	CKAP5
Q53EP0	Fibronectin type III domain-containing protein 3B	FNDC3B
P10253	Lysosomal alpha-glucosidase	GAA
E7ENQ1	Mitogen-activated protein kinase kinase kinase kinase 4	MAP4K4
Q8TAT6	Nuclear protein localization protein 4 homolog	NPLOC4
Q9NZL9	Methionine adenosyltransferase 2 subunit beta	MAT2B
P29966	Myristoylated alanine-rich C-kinase substrate	MARCKS
Q9UNS2	COP9 signalosome complex subunit 3	COPS3
Q99590	Protein SCAF11	SCAF11
O75947	ATP synthase subunit d, mitochondrial	ATP5PD
E9PFR3	Serine/threonine-protein phosphatase 2A 56 kDa regulatory subunit	PPP2R5D
P54727	UV excision repair protein RAD23 homolog B	RAD23B
Q13185	Chromobox protein homolog 3	CBX3
P22061	Protein-L-isoaspartate(D-aspartate) O-methyltransferase	PCMT1
Q96CW1	AP-2 complex subunit mu	AP2M1
Q2M389	WASH complex subunit 4	WASHC4
Q92621	Nuclear pore complex protein Nup205	NUP205
P61086	Ubiquitin-conjugating enzyme E2 K	UBE2K
P14324	Farnesyl pyrophosphate synthase	FDPS
P06132	Uroporphyrinogen decarboxylase	UROD
Q9UI12	V-type proton ATPase subunit H	ATP6V1H
Q9HB07	UPF0160 protein MYG1, mitochondrial	C12orf10
P17174	Aspartate aminotransferase, cytoplasmic	GOT1
O43837	Isocitrate dehydrogenase [NAD] subunit beta, mitochondrial	IDH3B
Q9UKG1	DCC-interacting protein 13-alpha	APPL1
Q8IX12	Cell division cycle and apoptosis regulator protein 1	CCAR1
Q15758	Neutral amino acid transporter B(0)	SLC1A5
A0A0A0MTH3	Integrin-linked protein kinase	ILK
Q00325	Phosphate carrier protein, mitochondrial	SLC25A3
P30086	Phosphatidylethanolamine-binding protein 1	PEBP1
P30154	Serine/threonine-protein phosphatase 2A 65 kDa regulatory subunit A beta isoform	PPP2R1B
P62280	40S ribosomal protein S11	RPS11
P53582	Methionine aminopeptidase 1	METAP1
Q8WU90	Zinc finger CCCH domain-containing protein 15	ZC3H15
Q9UJY5	ADP-ribosylation factor-binding protein GGA1	GGA1
P48047	ATP synthase subunit O, mitochondrial	ATP5PO
P33241	Lymphocyte-specific protein 1	LSP1
A0A1W2PS43	Lysosome membrane protein 2	SCARB2
O60711	Leupaxin	LPXN
P28288	ATP-binding cassette sub-family D member 3	ABCD3
P28062	Proteasome subunit beta type-8	PSMB8
A0A0G2JLB3	Glucosylceramidase	GBA
P43897	Elongation factor Ts, mitochondrial	TSFM
P52888	Thimet oligopeptidase	THOP1
D6RBZ0	Heterogeneous nuclear ribonucleoprotein A/B	HNRNPAB
Q9P0L0	Vesicle-associated membrane protein-associated protein A	VAPA
P43487	Ran-specific GTPase-activating protein	RANBP1
O94826	Mitochondrial import receptor subunit TOM70	TOMM70
Q9Y2B0	Protein canopy homolog 2	CNPY2
Q92905	COP9 signalosome complex subunit 5	COPS5
A0A0U1RQX8	E3 ubiquitin-protein ligase CBL	CBL
P32119	Peroxiredoxin-2	PRDX2
O15511	Actin-related protein 2/3 complex subunit 5	ARPC5
P04080	Cystatin-B	CSTB
P0CG38	POTE ankyrin domain family member I	POTEI
H0Y4R4	Torsin-1A-interacting protein 1 (Fragment)	TOR1AIP1
J3KRX5	60S ribosomal protein L17 (Fragment)	RPL17
R4GMQ1	Lysine-specific histone demethylase	KDM1A
P30405	Peptidyl-prolyl cis-trans isomerase F, mitochondrial	PPIF
A0A087WVM4	Monofunctional C1-tetrahydrofolate synthase, mitochondrial	MTHFD1L
O94874	E3 UFM1-protein ligase 1	UFL1
P18463	HLA class I histocompatibility antigen, B-37 alpha chain	HLA-B
P61019	Ras-related protein Rab-2A	RAB2A
Q13303	Voltage-gated potassium channel subunit beta-2	KCNAB2
Q15286	Ras-related protein Rab-35	RAB35
Q9HBI0	Gamma-parvin	PARVG
P00390	Glutathione reductase, mitochondrial	GSR
O00303	Eukaryotic translation initiation factor 3 subunit F	EIF3F
P53999	Activated RNA polymerase II transcriptional coactivator p15	SUB1
Q9NZM1	Myoferlin	MYOF
Q969V3	Nicalin	NCLN
P51153	Ras-related protein Rab-13	RAB13
P26373	60S ribosomal protein L13	RPL13
Q6PI48	Aspartate--tRNA ligase, mitochondrial	DARS2
Q8WZA9	Immunity-related GTPase family Q protein	IRGQ
P46783	40S ribosomal protein S10	RPS10
G3V0I5	NADH dehydrogenase [ubiquinone] flavoprotein 1, mitochondrial	NDUFV1
A6NFX8	ADP-sugar pyrophosphatase	NUDT5
Q8IXB1	DnaJ homolog subfamily C member 10	DNAJC10
Q02750	Dual specificity mitogen-activated protein kinase kinase 1	MAP2K1
O14776	Transcription elongation regulator 1	TCERG1
Q12769	Nuclear pore complex protein Nup160	NUP160
A0A024RCR6	HLA-B associated transcript 3, isoform CRA_a	BAG6
P16949	Stathmin	STMN1
Q96M27	Protein PRRC1	PRRC1
P10599	Thioredoxin	TXN
P04222	HLA class I histocompatibility antigen, Cw-3 alpha chain	HLA-C
P26583	High mobility group protein B2	HMGB2
Q15185	Prostaglandin E synthase 3	PTGES3
Q9UBQ7	Glyoxylate reductase/hydroxypyruvate reductase	GRHPR
Q16539	Mitogen-activated protein kinase 14	MAPK14
Q13217	DnaJ homolog subfamily C member 3	DNAJC3
Q9HB40	Retinoid-inducible serine carboxypeptidase	SCPEP1
Q8N766	ER membrane protein complex subunit 1	EMC1
Q92797	Symplekin	SYMPK
P62829	60S ribosomal protein L23	RPL23
O95299	NADH dehydrogenase [ubiquinone] 1 alpha subcomplex subunit 10, mitochondrial	NDUFA10
Q9UGI8	Testin	TES
P30480	HLA class I histocompatibility antigen, B-42 alpha chain	HLA-B
Q10713	Mitochondrial-processing peptidase subunit alpha	PMPCA
Q9Y383	Putative RNA-binding protein Luc7-like 2	LUC7L2
Q96I99	Succinate--CoA ligase [GDP-forming] subunit beta, mitochondrial	SUCLG2
Q9BUQ8	Probable ATP-dependent RNA helicase DDX23	DDX23
E9PK91	Bcl-2-associated transcription factor 1	BCLAF1
Q99459	Cell division cycle 5-like protein	CDC5L
P61006	Ras-related protein Rab-8A	RAB8A
Q7Z5R6	Amyloid beta A4 precursor protein-binding family B member 1-interacting protein	APBB1IP
P62979	Ubiquitin-40S ribosomal protein S27a	RPS27A
A0A087WY55	Chromosome 6 open reading frame 55, isoform CRA_b	VTA1
P30487	HLA class I histocompatibility antigen, B-49 alpha chain	HLA-B
P15586	N-acetylglucosamine-6-sulfatase	GNS
Q08752	Peptidyl-prolyl cis-trans isomerase D	PPID
F8VQE1	LIM domain and actin-binding protein 1	LIMA1
E9PFP8	Poly(rC)-binding protein 3	PCBP3
P46939	Utrophin	UTRN
O43765	Small glutamine-rich tetratricopeptide repeat-containing protein alpha	SGTA
O95394	Phosphoacetylglucosamine mutase	PGM3
E7EM64	COP9 signalosome complex subunit 6	COPS6
Q15717	ELAV-like protein 1	ELAVL1
Q96CM8	Acyl-CoA synthetase family member 2, mitochondrial	ACSF2
Q16576	Histone-binding protein RBBP7	RBBP7
P12931	Proto-oncogene tyrosine-protein kinase Src	SRC
Q05086	Ubiquitin-protein ligase E3A	UBE3A
P62750	60S ribosomal protein L23a	RPL23A
Q7Z406	Myosin-14	MYH14
Q9NZT2	Opioid growth factor receptor	OGFR
P60981	Destrin	DSTN
Q15154	Pericentriolar material 1 protein	PCM1
Q8IY67	Ribonucleoprotein PTB-binding 1	RAVER1
P06702	Protein S100-A9	S100A9
Q14739	Delta(14)-sterol reductase	LBR
Q32P28	Prolyl 3-hydroxylase 1	P3H1
P36957	Dihydrolipoyllysine-residue succinyltransferase component of 2-oxoglutarate dehydrogenase complex, mitochondrial	DLST
P15153	Ras-related C3 botulinum toxin substrate 2	RAC2
O95571	Persulfide dioxygenase ETHE1, mitochondrial	ETHE1
Q16401	26S proteasome non-ATPase regulatory subunit 5	PSMD5
P0CG39	POTE ankyrin domain family member J	POTEJ
Q9NQG5	Regulation of nuclear pre-mRNA domain-containing protein 1B	RPRD1B
O75368	SH3 domain-binding glutamic acid-rich-like protein	SH3BGRL
A0A024R4M0	40S ribosomal protein S9	RPS9
Q13557	Calcium/calmodulin-dependent protein kinase type II subunit delta	CAMK2D
O75436	Vacuolar protein sorting-associated protein 26A	VPS26A
Q7L0Y3	tRNA methyltransferase 10 homolog C	TRMT10C
J3KR97	Tubulin-specific chaperone D	TBCD
Q5JWF2	Guanine nucleotide-binding protein G(s) subunit alpha isoforms XLas	GNAS
E9PFH4	Transportin-3	TNPO3
Q9UIJ7	GTP:AMP phosphotransferase AK3, mitochondrial	AK3
Q9UI26	Importin-11	IPO11
Q9NRV9	Heme-binding protein 1	HEBP1
P54725	UV excision repair protein RAD23 homolog A	RAD23A
P42345	Serine/threonine-protein kinase mTOR	MTOR
Q9NTJ3	Structural maintenance of chromosomes protein 4	SMC4
P21912	Succinate dehydrogenase [ubiquinone] iron-sulfur subunit, mitochondrial	SDHB
Q9Y224	RNA transcription, translation and transport factor protein	RTRAF
P30479	HLA class I histocompatibility antigen, B-41 alpha chain	HLA-B
Q9H6T3	RNA polymerase II-associated protein 3	RPAP3
P01111	GTPase NRas	NRAS
Q14318	Peptidyl-prolyl cis-trans isomerase FKBP8	FKBP8
Q6L8Q7	2',5'-phosphodiesterase 12	PDE12
O14579	Coatomer subunit epsilon	COPE
Q9NR45	Sialic acid synthase	NANS
Q3ZCQ8	Mitochondrial import inner membrane translocase subunit TIM50	TIMM50
P08237	ATP-dependent 6-phosphofructokinase, muscle type	PFKM
P51114	Fragile X mental retardation syndrome-related protein 1	FXR1
O15294	UDP-N-acetylglucosamine--peptide N-acetylglucosaminyltransferase 110 kDa subunit	OGT
P31942	Heterogeneous nuclear ribonucleoprotein H3	HNRNPH3
Q9NP72	Ras-related protein Rab-18	RAB18
E7EW49	CLIP-associating protein 2	CLASP2
Q58FF6	Putative heat shock protein HSP 90-beta 4	HSP90AB4P
O95336	6-phosphogluconolactonase	PGLS
Q9UKY7	Protein CDV3 homolog	CDV3
A0A087WUC6	Signal peptidase complex subunit 2	SPCS2
Q13151	Heterogeneous nuclear ribonucleoprotein A0	HNRNPA0
O00505	Importin subunit alpha-4	KPNA3
Q9UNP9	Peptidyl-prolyl cis-trans isomerase E	PPIE
O95831	Apoptosis-inducing factor 1, mitochondrial	AIFM1
P53007	Tricarboxylate transport protein, mitochondrial	SLC25A1
P54709	Sodium/potassium-transporting ATPase subunit beta-3	ATP1B3
P59998	Actin-related protein 2/3 complex subunit 4	ARPC4
B1ALA9	Ribose-phosphate pyrophosphokinase 1	PRPS1
Q8N3C0	Activating signal cointegrator 1 complex subunit 3	ASCC3
Q9HCU5	Prolactin regulatory element-binding protein	PREB
Q99880	Histone H2B type 1-L	HIST1H2BL
P49720	Proteasome subunit beta type-3	PSMB3
Q9H3P7	Golgi resident protein GCP60	ACBD3
Q7Z4V5	Hepatoma-derived growth factor-related protein 2	HDGFL2
Q5ZPR3	CD276 antigen	CD276
Q5QNW6	Histone H2B type 2-F	HIST2H2BF
Q92769	Histone deacetylase 2	HDAC2
E9PC62	CUGBP Elav-like family member 2	CELF2
J3QQ67	60S ribosomal protein L18 (Fragment)	RPL18
Q8TDW0	Volume-regulated anion channel subunit LRRC8C	LRRC8C
P22307	Non-specific lipid-transfer protein	SCP2
P50452	Serpin B8	SERPINB8
P39019	40S ribosomal protein S19	RPS19
Q15293	Reticulocalbin-1	RCN1
Q9NPH2	Inositol-3-phosphate synthase 1	ISYNA1
O95757	Heat shock 70 kDa protein 4L	HSPA4L
Q9Y6D6	Brefeldin A-inhibited guanine nucleotide-exchange protein 1	ARFGEF1
P63208	S-phase kinase-associated protein 1	SKP1
A0A0G2JHC2	PPP1R18	PPP1R18
Q9UNH7	Sorting nexin-6	SNX6
P45973	Chromobox protein homolog 5	CBX5
Q8N3U4	Cohesin subunit SA-2	STAG2
Q9H4A6	Golgi phosphoprotein 3	GOLPH3
Q5JRX3	Presequence protease, mitochondrial	PITRM1
O75477	Erlin-1	ERLIN1
Q68EM7	Rho GTPase-activating protein 17	ARHGAP17
P34910	Protein EVI2B	EVI2B
Q14141	Septin-6	SEPT6
P50914	60S ribosomal protein L14	RPL14
F5GYQ1	V-type proton ATPase subunit	ATP6V0D1
P55145	Mesencephalic astrocyte-derived neurotrophic factor	MANF
Q14677	Clathrin interactor 1	CLINT1
O94905	Erlin-2	ERLIN2
P63279	SUMO-conjugating enzyme UBC9	UBE2I
P51531	Probable global transcription activator SNF2L2	SMARCA2
M0QWZ7	Serine--tRNA ligase, mitochondrial	SARS2
P46734	Dual specificity mitogen-activated protein kinase kinase 3	MAP2K3
P48426	Phosphatidylinositol 5-phosphate 4-kinase type-2 alpha	PIP4K2A
O14786	Neuropilin-1	NRP1
P40855	Peroxisomal biogenesis factor 19	PEX19
Q6DD88	Atlastin-3	ATL3
Q00796	Sorbitol dehydrogenase	SORD
K7EMQ3	Dynamin-2 (Fragment)	DNM2
P80303	Nucleobindin-2	NUCB2
H7BXH2	Serine/threonine-protein phosphatase 6 regulatory subunit 3	PPP6R3
Q7KZ85	Transcription elongation factor SPT6	SUPT6H
Q16836	Hydroxyacyl-coenzyme A dehydrogenase, mitochondrial	HADH
A0A087X1H5	Arf-GAP with coiled-coil, ANK repeat and PH domain-containing protein 2	ACAP2
Q15637	Splicing factor 1	SF1
P63000	Ras-related C3 botulinum toxin substrate 1	RAC1
P55957	BH3-interacting domain death agonist	BID
P22059	Oxysterol-binding protein 1	OSBP
Q8IV08	Phospholipase D3	PLD3
Q14790	Caspase-8	CASP8
Q02818	Nucleobindin-1	NUCB1
A0A1W2PQS6	RPS10-NUDT3 readthrough	RPS10-NUDT3
Q9Y2T2	AP-3 complex subunit mu-1	AP3M1
P62249	40S ribosomal protein S16	RPS16
P68036	Ubiquitin-conjugating enzyme E2 L3	UBE2L3
P16989	Y-box-binding protein 3	YBX3
P08621	U1 small nuclear ribonucleoprotein 70 kDa	SNRNP70
O75306	NADH dehydrogenase [ubiquinone] iron-sulfur protein 2, mitochondrial	NDUFS2
Q9BTV4	Transmembrane protein 43	TMEM43
C9J840	Mitogen-activated protein kinase kinase kinase kinase 4	MAP4K4
A0A087WT45	GRIP1-associated protein 1	GRIPAP1
P49407	Beta-arrestin-1	ARRB1
X5CMH5	Antigen peptide transporter 2	TAP2
Q9NTZ6	RNA-binding protein 12	RBM12
P00492	Hypoxanthine-guanine phosphoribosyltransferase	HPRT1
P61088	Ubiquitin-conjugating enzyme E2 N	UBE2N
J3KR49	CLIP-associating protein 2	CLASP2
Q92538	Golgi-specific brefeldin A-resistance guanine nucleotide exchange factor 1	GBF1
Q9Y4W6	AFG3-like protein 2	AFG3L2
Q01469	Fatty acid-binding protein 5	FABP5
Q12768	WASH complex subunit 5	WASHC5
P36507	Dual specificity mitogen-activated protein kinase kinase 2	MAP2K2
C9JSZ1	Far upstream element-binding protein 1 (Fragment)	FUBP1
Q16778	Histone H2B type 2-E	HIST2H2BE
P62633	Cellular nucleic acid-binding protein	CNBP
Q12797	Aspartyl/asparaginyl beta-hydroxylase	ASPH
G3V3E8	NPC intracellular cholesterol transporter 2	NPC2
Q9UHD2	Serine/threonine-protein kinase TBK1	TBK1
P48556	26S proteasome non-ATPase regulatory subunit 8	PSMD8
Q6NVY1	3-hydroxyisobutyryl-CoA hydrolase, mitochondrial	HIBCH
Q15121	Astrocytic phosphoprotein PEA-15	PEA15
Q12874	Splicing factor 3A subunit 3	SF3A3
A0A2R8Y6Y7	Succinate--CoA ligase [ADP-forming] subunit beta, mitochondrial	SUCLA2
P36543	V-type proton ATPase subunit E 1	ATP6V1E1
Q9Y5K5	Ubiquitin carboxyl-terminal hydrolase isozyme L5	UCHL5
P61081	NEDD8-conjugating enzyme Ubc12	UBE2M
Q9NZ01	Very-long-chain enoyl-CoA reductase	TECR
P49721	Proteasome subunit beta type-2	PSMB2
O15031	Plexin-B2	PLXNB2
Q9UNN5	FAS-associated factor 1	FAF1
F8WJN3	Cleavage and polyadenylation-specificity factor subunit 6	CPSF6
Q13043	Serine/threonine-protein kinase 4	STK4
P54687	Branched-chain-amino-acid aminotransferase, cytosolic	BCAT1
P78324	Tyrosine-protein phosphatase non-receptor type substrate 1	SIRPA
Q14019	Coactosin-like protein	COTL1
P08311	Cathepsin G	CTSG
Q07666	KH domain-containing, RNA-binding, signal transduction-associated protein 1	KHDRBS1
Q9UJS0	Calcium-binding mitochondrial carrier protein Aralar2	SLC25A13
P19878	Neutrophil cytosol factor 2	NCF2
O75340	Programmed cell death protein 6	PDCD6
P62888	60S ribosomal protein L30	RPL30
P51452	Dual specificity protein phosphatase 3	DUSP3
O95347	Structural maintenance of chromosomes protein 2	SMC2
Q8NBJ5	Procollagen galactosyltransferase 1	COLGALT1
E7EQ69	N-alpha-acetyltransferase 50	NAA50
Q12882	Dihydropyrimidine dehydrogenase [NADP(+)]	DPYD
P13073	Cytochrome c oxidase subunit 4 isoform 1, mitochondrial	COX4I1
O75608	Acyl-protein thioesterase 1	LYPLA1
H7BZJ3	Protein disulfide-isomerase A3 (Fragment)	PDIA3
P40429	60S ribosomal protein L13a	RPL13A
P08574	Cytochrome c1, heme protein, mitochondrial	CYC1
P19784	Casein kinase II subunit alpha'	CSNK2A2
H3BQQ9	SUMO-conjugating enzyme UBC9 (Fragment)	UBE2I
F5GWT4	Serine/threonine-protein kinase WNK1	WNK1
P09661	U2 small nuclear ribonucleoprotein A'	SNRPA1
O00743	Serine/threonine-protein phosphatase 6 catalytic subunit	PPP6C
Q99805	Transmembrane 9 superfamily member 2	TM9SF2
E9PDF6	Unconventional myosin-Ib	MYO1B
E9PL71	Elongation factor 1-delta (Fragment)	EEF1D
Q9ULC4	Malignant T-cell-amplified sequence 1	MCTS1
Q13057	Bifunctional coenzyme A synthase	COASY
Q9BT09	Protein canopy homolog 3	CNPY3
A0A087X1K9	Acyl-protein thioesterase 1	LYPLA1
H0Y3U8	Chitinase-3-like protein 1 (Fragment)	CHI3L1
P61326	Protein mago nashi homolog	MAGOH
P23919	Thymidylate kinase	DTYMK
K7EIG1	Clustered mitochondria protein homolog (Fragment)	CLUH
H0YD13	CD44 antigen	CD44
Q96CX2	BTB/POZ domain-containing protein KCTD12	KCTD12
B4DLR8	NAD(P)H dehydrogenase [quinone] 1	NQO1
A0A087WXS7	ATPase ASNA1	ASNA1
O00182	Galectin-9	LGALS9
P27105	Erythrocyte band 7 integral membrane protein	STOM
Q9UBQ5	Eukaryotic translation initiation factor 3 subunit K	EIF3K
E7EU96	Casein kinase II subunit alpha	CSNK2A1
J3KS22	L-xylulose reductase (Fragment)	DCXR
P48059	LIM and senescent cell antigen-like-containing domain protein 1	LIMS1
Q15363	Transmembrane emp24 domain-containing protein 2	TMED2
Q9BRR6	ADP-dependent glucokinase	ADPGK
Q9P287	BRCA2 and CDKN1A-interacting protein	BCCIP
O75396	Vesicle-trafficking protein SEC22b	SEC22B
P20020	Plasma membrane calcium-transporting ATPase 1	ATP2B1
O95747	Serine/threonine-protein kinase OSR1	OXSR1
P33316	Deoxyuridine 5'-triphosphate nucleotidohydrolase, mitochondrial	DUT
P51003	Poly(A) polymerase alpha	PAPOLA
O75351	Vacuolar protein sorting-associated protein 4B	VPS4B
A0A0A0MRM9	Nucleolar and coiled-body phosphoprotein 1 (Fragment)	NOLC1
B1AXG1	Non-specific serine/threonine protein kinase	RPS6KA3
F8VXU5	Vacuolar protein sorting-associated protein 29	VPS29
P49354	Protein farnesyltransferase/geranylgeranyltransferase type-1 subunit alpha	FNTA
O75400	Pre-mRNA-processing factor 40 homolog A	PRPF40A
Q15427	Splicing factor 3B subunit 4	SF3B4
O76071	Probable cytosolic iron-sulfur protein assembly protein CIAO1	CIAO1
P61970	Nuclear transport factor 2	NUTF2
A0A2R8YG42	Rho guanine nucleotide exchange factor 7	ARHGEF7
O14672	Disintegrin and metalloproteinase domain-containing protein 10	ADAM10
O95218	Zinc finger Ran-binding domain-containing protein 2	ZRANB2
Q13464	Rho-associated protein kinase 1	ROCK1
P50416	Carnitine O-palmitoyltransferase 1, liver isoform	CPT1A
Q9UPU5	Ubiquitin carboxyl-terminal hydrolase 24	USP24
Q06124	Tyrosine-protein phosphatase non-receptor type 11	PTPN11
Q96EY7	Pentatricopeptide repeat domain-containing protein 3, mitochondrial	PTCD3
P01137	Transforming growth factor beta-1 proprotein	TGFB1
P20645	Cation-dependent mannose-6-phosphate receptor	M6PR
Q15813	Tubulin-specific chaperone E	TBCE
Q9UBS4	DnaJ homolog subfamily B member 11	DNAJB11
Q5VW32	BRO1 domain-containing protein BROX	BROX
P49585	Choline-phosphate cytidylyltransferase A	PCYT1A
O75937	DnaJ homolog subfamily C member 8	DNAJC8
B4DR61	cDNA FLJ59739, highly similar to Protein transport protein Sec61 subunit alpha isoform 1	SEC61A1
Q5QPL9	RNA-binding protein Raly (Fragment)	RALY
A0A2R8Y5P7	Probable histidine--tRNA ligase, mitochondrial	HARS2
Q9Y6D5	Brefeldin A-inhibited guanine nucleotide-exchange protein 2	ARFGEF2
P08243	Asparagine synthetase [glutamine-hydrolyzing]	ASNS
D3YTB1	60S ribosomal protein L32 (Fragment)	RPL32
Q13131	5'-AMP-activated protein kinase catalytic subunit alpha-1	PRKAA1
Q9BWS9	Chitinase domain-containing protein 1	CHID1
Q9UHD1	Cysteine and histidine-rich domain-containing protein 1	CHORDC1
P09493	Tropomyosin alpha-1 chain	TPM1
Q9Y2I1	Nischarin	NISCH
P23258	Tubulin gamma-1 chain	TUBG1
O43290	U4/U6.U5 tri-snRNP-associated protein 1	SART1
O14773	Tripeptidyl-peptidase 1	TPP1
Q99426	Tubulin-folding cofactor B	TBCB
J3KR44	Ubiquitin thioesterase	OTUB1
Q9UBF2	Coatomer subunit gamma-2	COPG2
B4DFG0	cDNA FLJ53031, highly similar to Protein DEK	DEK
Q6YHK3	CD109 antigen	CD109
O75718	Cartilage-associated protein	CRTAP
P26440	Isovaleryl-CoA dehydrogenase, mitochondrial	IVD
Q9BZQ8	Protein Niban	FAM129A
P98171	Rho GTPase-activating protein 4	ARHGAP4
P02794	Ferritin heavy chain	FTH1
Q53GS9	U4/U6.U5 tri-snRNP-associated protein 2	USP39
A0A3B3IUB5	Minor histocompatibility antigen H13	HM13
P47985	Cytochrome b-c1 complex subunit Rieske, mitochondrial	UQCRFS1
Q15428	Splicing factor 3A subunit 2	SF3A2
P62277	40S ribosomal protein S13	RPS13
Q9Y6E2	Basic leucine zipper and W2 domain-containing protein 2	BZW2
I3L0A0	HCG2044781	TMEM189-UBE2V1
O95232	Luc7-like protein 3	LUC7L3
P49902	Cytosolic purine 5'-nucleotidase	NT5C2
P01584	Interleukin-1 beta	IL1B
Q9BRP8	Partner of Y14 and mago	PYM1
Q9NX58	Cell growth-regulating nucleolar protein	LYAR
D3DTX6	Neurabin-2	PPP1R9B
A0A2R8Y811	40S ribosomal protein S14 (Fragment)	RPS14
O95486	Protein transport protein Sec24A	SEC24A
O76031	ATP-dependent Clp protease ATP-binding subunit clpX-like, mitochondrial	CLPX
Q8NCW5	NAD(P)H-hydrate epimerase	NAXE
Q96HY6	DDRGK domain-containing protein 1	DDRGK1
Q9Y394	Dehydrogenase/reductase SDR family member 7	DHRS7
E9PB61	THO complex subunit 4	ALYREF
Q13247	Serine/arginine-rich splicing factor 6	SRSF6
P18754	Regulator of chromosome condensation	RCC1
P27986	Phosphatidylinositol 3-kinase regulatory subunit alpha	PIK3R1
Q5VVC8	60S ribosomal protein L11	RPL11
J3KPD6	Tyrosine-protein kinase	HCK
Q9UHL4	Dipeptidyl peptidase 2	DPP7
Q96S52	GPI transamidase component PIG-S	PIGS
O75821	Eukaryotic translation initiation factor 3 subunit G	EIF3G
P41567	Eukaryotic translation initiation factor 1	EIF1
P00403	Cytochrome c oxidase subunit 2	MT-CO2
A0A0R4J2G3	Arylacetamide deacetylase-like 1	NCEH1
P05109	Protein S100-A8	S100A8
P48507	Glutamate--cysteine ligase regulatory subunit	GCLM
Q9UN86	Ras GTPase-activating protein-binding protein 2	G3BP2
Q9Y6W5	Wiskott-Aldrich syndrome protein family member 2	WASF2
P11233	Ras-related protein Ral-A	RALA
P46776	60S ribosomal protein L27a	RPL27A
Q9UBQ0	Vacuolar protein sorting-associated protein 29	VPS29
Q8IUR7	Armadillo repeat-containing protein 8	ARMC8
Q03154	Aminoacylase-1	ACY1
Q92804	TATA-binding protein-associated factor 2N	TAF15
Q96K17	Transcription factor BTF3 homolog 4	BTF3L4
Q08170	Serine/arginine-rich splicing factor 4	SRSF4
Q9Y5S9	RNA-binding protein 8A	RBM8A
Q15631	Translin	TSN
Q9H307	Pinin	PNN
Q8IYB3	Serine/arginine repetitive matrix protein 1	SRRM1
D6RBW1	Eukaryotic translation initiation factor 4E	EIF4E
H3BN98	Uncharacterized protein (Fragment)
Q9BQA1	Methylosome protein 50	WDR77
A0A087WXL6	Vacuolar protein sorting-associated protein 11 homolog	VPS11
P47813	Eukaryotic translation initiation factor 1A, X-chromosomal	EIF1AX
P20701	Integrin alpha-L	ITGAL
Q14161	ARF GTPase-activating protein GIT2	GIT2
Q16186	Proteasomal ubiquitin receptor ADRM1	ADRM1
P31949	Protein S100-A11	S100A11
Q15021	Condensin complex subunit 1	NCAPD2
H7C4C5	Microtubule-associated protein (Fragment)	MAP4
Q9C0E2	Exportin-4	XPO4
A0A2R8Y849	40S ribosomal protein S24	RPS24
Q52LJ0	Protein FAM98B	FAM98B
Q14165	Malectin	MLEC
Q9NRR5	Ubiquilin-4	UBQLN4
Q9UKV8	Protein argonaute-2	AGO2
Q9GZZ9	Ubiquitin-like modifier-activating enzyme 5	UBA5
Q4KMQ2	Anoctamin-6	ANO6
Q96PY5	Formin-like protein 2	FMNL2
Q96ST2	Protein IWS1 homolog	IWS1
Q9UFN0	Protein NipSnap homolog 3A	NIPSNAP3A
Q9BZK7	F-box-like/WD repeat-containing protein TBL1XR1	TBL1XR1
P09110	3-ketoacyl-CoA thiolase, peroxisomal	ACAA1
O00170	AH receptor-interacting protein	AIP
P62899	60S ribosomal protein L31	RPL31
O43432	Eukaryotic translation initiation factor 4 gamma 3	EIF4G3
O15357	Phosphatidylinositol 3,4,5-trisphosphate 5-phosphatase 2	INPPL1
Q8WW12	PEST proteolytic signal-containing nuclear protein	PCNP
O75347	Tubulin-specific chaperone A	TBCA
Q86Y56	Dynein assembly factor 5, axonemal	DNAAF5
A6NNK5	TP53-binding protein 1	TP53BP1
P42566	Epidermal growth factor receptor substrate 15	EPS15
Q92522	Histone H1x	H1FX
Q9UBU9	Nuclear RNA export factor 1	NXF1
P15374	Ubiquitin carboxyl-terminal hydrolase isozyme L3	UCHL3
Q6PD62	RNA polymerase-associated protein CTR9 homolog	CTR9
G3V5V3	Nuclear export mediator factor NEMF (Fragment)	NEMF
Q96BW5	Phosphotriesterase-related protein	PTER
O43809	Cleavage and polyadenylation specificity factor subunit 5	NUDT21
P19838	Nuclear factor NF-kappa-B p105 subunit	NFKB1
Q15056	Eukaryotic translation initiation factor 4H	EIF4H
P07948	Tyrosine-protein kinase Lyn	LYN
O00567	Nucleolar protein 56	NOP56
P62244	40S ribosomal protein S15a	RPS15A
O15145	Actin-related protein 2/3 complex subunit 3	ARPC3
P67812	Signal peptidase complex catalytic subunit SEC11A	SEC11A
H0YIC4	Citrate synthase (Fragment)	CS
Q8WUM9	Sodium-dependent phosphate transporter 1	SLC20A1
Q93084	Sarcoplasmic/endoplasmic reticulum calcium ATPase 3	ATP2A3
O14602	Eukaryotic translation initiation factor 1A, Y-chromosomal	EIF1AY
O75064	DENN domain-containing protein 4B	DENND4B
Q86Y82	Syntaxin-12	STX12
Q99541	Perilipin-2	PLIN2
Q9BW27	Nuclear pore complex protein Nup85	NUP85
P26447	Protein S100-A4	S100A4
Q13724	Mannosyl-oligosaccharide glucosidase	MOGS
P53004	Biliverdin reductase A	BLVRA
Q9NXG2	THUMP domain-containing protein 1	THUMPD1
O75475	PC4 and SFRS1-interacting protein	PSIP1
Q9H9J2	39S ribosomal protein L44, mitochondrial	MRPL44
A0A087WUQ6	Glutathione peroxidase	GPX1
P11169	Solute carrier family 2, facilitated glucose transporter member 3	SLC2A3
Q6P996	Pyridoxal-dependent decarboxylase domain-containing protein 1	PDXDC1
Q9BVK6	Transmembrane emp24 domain-containing protein 9	TMED9
Q9H2G2	STE20-like serine/threonine-protein kinase	SLK
P05166	Propionyl-CoA carboxylase beta chain, mitochondrial	PCCB
P25774	Cathepsin S	CTSS
O43493	Trans-Golgi network integral membrane protein 2	TGOLN2
Q9BY32	Inosine triphosphate pyrophosphatase	ITPA
Q9NT62	Ubiquitin-like-conjugating enzyme ATG3	ATG3
Q15477	Helicase SKI2W	SKIV2L
P49757	Protein numb homolog	NUMB
Q00688	Peptidyl-prolyl cis-trans isomerase FKBP3	FKBP3
P62269	40S ribosomal protein S18	RPS18
P21127	Cyclin-dependent kinase 11B	CDK11B
P46778	60S ribosomal protein L21	RPL21
Q92542	Nicastrin	NCSTN
Q15785	Mitochondrial import receptor subunit TOM34	TOMM34
Q14151	Scaffold attachment factor B2	SAFB2
A0A2R8YEL6	Glutamate--cysteine ligase catalytic subunit (Fragment)	GCLC
I3L2B0	Clustered mitochondria protein homolog (Fragment)	CLUH
Q9H3N1	Thioredoxin-related transmembrane protein 1	TMX1
P53597	Succinate--CoA ligase [ADP/GDP-forming] subunit alpha, mitochondrial	SUCLG1
Q7Z2W4	Zinc finger CCCH-type antiviral protein 1	ZC3HAV1
Q96JB5	CDK5 regulatory subunit-associated protein 3	CDK5RAP3
Q09160	HLA class I histocompatibility antigen, A-80 alpha chain	HLA-A
P84098	60S ribosomal protein L19	RPL19
Q9BTU6	Phosphatidylinositol 4-kinase type 2-alpha	PI4K2A
Q8TF05	Serine/threonine-protein phosphatase 4 regulatory subunit 1	PPP4R1
A0A0C4DFM1	Transmembrane 9 superfamily member	TM9SF4
Q13162	Peroxiredoxin-4	PRDX4
Q13442	28 kDa heat- and acid-stable phosphoprotein	PDAP1
Q9Y2L9	Leucine-rich repeat and calponin homology domain-containing protein 1	LRCH1
P62995	Transformer-2 protein homolog beta	TRA2B
Q9UBV2	Protein sel-1 homolog 1	SEL1L
P62805	Histone H4	HIST1H4A
Q99436	Proteasome subunit beta type-7	PSMB7
Q99614	Tetratricopeptide repeat protein 1	TTC1
M0R165	Epidermal growth factor receptor substrate 15-like 1	EPS15L1
P80217	Interferon-induced 35 kDa protein	IFI35
P00568	Adenylate kinase isoenzyme 1	AK1
P09668	Pro-cathepsin H	CTSH
P62316	Small nuclear ribonucleoprotein Sm D2	SNRPD2
P43405	Tyrosine-protein kinase SYK	SYK
P46109	Crk-like protein	CRKL
P10412	Histone H1.4	HIST1H1E
Q96II8	Leucine-rich repeat and calponin homology domain-containing protein 3	LRCH3
Q9HAB8	Phosphopantothenate--cysteine ligase	PPCS
P20340	Ras-related protein Rab-6A	RAB6A
P25398	40S ribosomal protein S12	RPS12
E7EVX8	U4/U6 small nuclear ribonucleoprotein Prp31	PRPF31
P52948	Nuclear pore complex protein Nup98-Nup96	NUP98
Q9Y570	Protein phosphatase methylesterase 1	PPME1
Q14232	Translation initiation factor eIF-2B subunit alpha	EIF2B1
F6U1T9	Calcineurin subunit B type 1	PPP3R1
Q9Y4P3	Transducin beta-like protein 2	TBL2
B0QYK0	RNA-binding protein EWS	EWSR1
Q9Y316	Protein MEMO1	MEMO1
E9PF32	DENN domain-containing protein 3	DENND3
Q15369	Elongin-C	ELOC
Q9NRW7	Vacuolar protein sorting-associated protein 45	VPS45
Q9BRF8	Serine/threonine-protein phosphatase CPPED1	CPPED1
Q9Y6B6	GTP-binding protein SAR1b	SAR1B
Q9BXK5	Bcl-2-like protein 13	BCL2L13
Q68E01	Integrator complex subunit 3	INTS3
F8W8I6	Nucleolysin TIA-1 isoform p40	TIA1
A0A1B0GW68	Acid ceramidase	ASAH1
A0A1W2PNP0	GPI transamidase component PIG-T (Fragment)	PIGT
P05386	60S acidic ribosomal protein P1	RPLP1
Q13144	Translation initiation factor eIF-2B subunit epsilon	EIF2B5
Q9H2J4	Phosducin-like protein 3	PDCL3
O94888	UBX domain-containing protein 7	UBXN7
Q05193	Dynamin-1	DNM1
Q9Y3B3	Transmembrane emp24 domain-containing protein 7	TMED7
Q96JJ7	Protein disulfide-isomerase TMX3	TMX3
Q15819	Ubiquitin-conjugating enzyme E2 variant 2	UBE2V2
O43172	U4/U6 small nuclear ribonucleoprotein Prp4	PRPF4
P35237	Serpin B6	SERPINB6
Q99570	Phosphoinositide 3-kinase regulatory subunit 4	PIK3R4
J3KR55	Tyrosine-protein phosphatase non-receptor type 7 (Fragment)	PTPN7
A0A0A0MT32	Lysosomal acid lipase/cholesteryl ester hydrolase	LIPA
P61923	Coatomer subunit zeta-1	COPZ1
Q92882	Osteoclast-stimulating factor 1	OSTF1
E9PKP7	Nucleolar transcription factor 1	UBTF
B4DLN1	cDNA FLJ60124, highly similar to Mitochondrial dicarboxylate carrier
P05413	Fatty acid-binding protein, heart	FABP3
P25685	DnaJ homolog subfamily B member 1	DNAJB1
Q13287	N-myc-interactor	NMI
Q96GA7	Serine dehydratase-like	SDSL
O95816	BAG family molecular chaperone regulator 2	BAG2
P52790	Hexokinase-3	HK3
E7ET15	U2 snRNP-associated SURP motif-containing protein	U2SURP
Q9BW92	Threonine--tRNA ligase, mitochondrial	TARS2
O95479	GDH/6PGL endoplasmic bifunctional protein	H6PD
Q08378	Golgin subfamily A member 3	GOLGA3
Q9Y6E0	Serine/threonine-protein kinase 24	STK24
Q9H299	SH3 domain-binding glutamic acid-rich-like protein 3	SH3BGRL3
Q9Y5Z4	Heme-binding protein 2	HEBP2
Q9UMX0	Ubiquilin-1	UBQLN1
A0A0A0MSQ0	Plastin-3	PLS3
Q6PGP7	Tetratricopeptide repeat protein 37	TTC37
Q86X76	Deaminated glutathione amidase	NIT1
P09132	Signal recognition particle 19 kDa protein	SRP19
Q9GZS3	WD repeat-containing protein 61	WDR61
Q8WYA6	Beta-catenin-like protein 1	CTNNBL1
Q9Y6M7	Sodium bicarbonate cotransporter 3	SLC4A7
Q96IU4	Protein ABHD14B	ABHD14B
C9JFR7	Cytochrome c (Fragment)	CYCS
O43447	Peptidyl-prolyl cis-trans isomerase H	PPIH
Q93050	V-type proton ATPase 116 kDa subunit a isoform 1	ATP6V0A1
Q15031	Probable leucine--tRNA ligase, mitochondrial	LARS2
Q00169	Phosphatidylinositol transfer protein alpha isoform	PITPNA
Q9NPQ8	Synembryn-A	RIC8A
P11908	Ribose-phosphate pyrophosphokinase 2	PRPS2
A0A3B3IRT8	Translocon-associated protein subunit alpha	SSR1
P16403	Histone H1.2	HIST1H1C
P83731	60S ribosomal protein L24	RPL24
Q96A65	Exocyst complex component 4	EXOC4
P62330	ADP-ribosylation factor 6	ARF6
P28072	Proteasome subunit beta type-6	PSMB6
Q96C86	m7GpppX diphosphatase	DCPS
O75223	Gamma-glutamylcyclotransferase	GGCT
O94855	Protein transport protein Sec24D	SEC24D
Q8IWB7	WD repeat and FYVE domain-containing protein 1	WDFY1
Q8NBF2	NHL repeat-containing protein 2	NHLRC2
O43823	A-kinase anchor protein 8	AKAP8
Q9Y2X3	Nucleolar protein 58	NOP58
Q6IN85	Serine/threonine-protein phosphatase 4 regulatory subunit 3A	PPP4R3A
O14964	Hepatocyte growth factor-regulated tyrosine kinase substrate	HGS
Q9UPN7	Serine/threonine-protein phosphatase 6 regulatory subunit 1	PPP6R1
P78406	mRNA export factor	RAE1
P60983	Glia maturation factor beta	GMFB
Q2TAY7	WD40 repeat-containing protein SMU1	SMU1
A0A2R8Y738	Ribosomal protein L15 (Fragment)	RPL15
Q6FI81	Anamorsin	CIAPIN1
P35268	60S ribosomal protein L22	RPL22
P12955	Xaa-Pro dipeptidase	PEPD
P13995	Bifunctional methylenetetrahydrofolate dehydrogenase/cyclohydrolase, mitochondrial	MTHFD2
A0A024R442	Aspartyl aminopeptidase, isoform CRA_b	DNPEP
Q04837	Single-stranded DNA-binding protein, mitochondrial	SSBP1
A0A2Q2TH77	Golgin subfamily A member 2	GOLGA2
Q9Y6K5	2'-5'-oligoadenylate synthase 3	OAS3
O60888	Protein CutA	CUTA
Q9Y6C9	Mitochondrial carrier homolog 2	MTCH2
P50135	Histamine N-methyltransferase	HNMT
Q9H7D7	WD repeat-containing protein 26	WDR26
Q14789	Golgin subfamily B member 1	GOLGB1
Q9UJ70	N-acetyl-D-glucosamine kinase	NAGK
Q01085	Nucleolysin TIAR	TIAL1
O00186	Syntaxin-binding protein 3	STXBP3
P30533	Alpha-2-macroglobulin receptor-associated protein	LRPAP1
O43264	Centromere/kinetochore protein zw10 homolog	ZW10
Q8N3D4	EH domain-binding protein 1-like protein 1	EHBP1L1
P62987	Ubiquitin-60S ribosomal protein L40	UBA52
Q86TI2	Dipeptidyl peptidase 9	DPP9
Q96RS6	NudC domain-containing protein 1	NUDCD1
P58546	Myotrophin	MTPN
Q53H82	Endoribonuclease LACTB2	LACTB2
A6NDG6	Glycerol-3-phosphate phosphatase	PGP
O15269	Serine palmitoyltransferase 1	SPTLC1
Q7Z3B4	Nucleoporin p54	NUP54
P14678	Small nuclear ribonucleoprotein-associated proteins B and B'	SNRPB
Q8IVF7	Formin-like protein 3	FMNL3
P60510	Serine/threonine-protein phosphatase 4 catalytic subunit	PPP4C
Q9NRY5	Protein FAM114A2	FAM114A2
Q9GZT8	NIF3-like protein 1	NIF3L1
Q02809	Procollagen-lysine,2-oxoglutarate 5-dioxygenase 1	PLOD1
P61604	10 kDa heat shock protein, mitochondrial	HSPE1
Q9Y385	Ubiquitin-conjugating enzyme E2 J1	UBE2J1
P21399	Cytoplasmic aconitate hydratase	ACO1
P51692	Signal transducer and activator of transcription 5B	STAT5B
Q9P035	Very-long-chain (3R)-3-hydroxyacyl-CoA dehydratase 3	HACD3
Q13907	Isopentenyl-diphosphate Delta-isomerase 1	IDI1
O60493	Sorting nexin-3	SNX3
Q969H8	Myeloid-derived growth factor	MYDGF
P13284	Gamma-interferon-inducible lysosomal thiol reductase	IFI30
P09769	Tyrosine-protein kinase Fgr	FGR
P09417	Dihydropteridine reductase	QDPR
Q9GZY6	Linker for activation of T-cells family member 2	LAT2
Q8NI27	THO complex subunit 2	THOC2
P61758	Prefoldin subunit 3	VBP1
Q92747	Actin-related protein 2/3 complex subunit 1A	ARPC1A
O94903	Pyridoxal phosphate homeostasis protein	PLPBP
H0YHS6	Tyrosine--tRNA ligase (Fragment)	YARS2
Q13636	Ras-related protein Rab-31	RAB31
A0A1W2PPZ5	Transcription elongation factor A protein 1	TCEA1
Q92696	Geranylgeranyl transferase type-2 subunit alpha	RABGGTA
P16401	Histone H1.5	HIST1H1B
Q08209	Serine/threonine-protein phosphatase 2B catalytic subunit alpha isoform	PPP3CA
Q9NVP1	ATP-dependent RNA helicase DDX18	DDX18
Q9H8Y8	Golgi reassembly-stacking protein 2	GORASP2
Q9Y2W1	Thyroid hormone receptor-associated protein 3	THRAP3
O15254	Peroxisomal acyl-coenzyme A oxidase 3	ACOX3
Q9NRF8	CTP synthase 2	CTPS2
A6NHR9	Structural maintenance of chromosomes flexible hinge domain-containing protein 1	SMCHD1
P62266	40S ribosomal protein S23	RPS23
P82650	28S ribosomal protein S22, mitochondrial	MRPS22
F5H442	Tumor susceptibility gene 101 protein	TSG101
Q9Y512	Sorting and assembly machinery component 50 homolog	SAMM50
Q5JVF3	PCI domain-containing protein 2	PCID2
Q99653	Calcineurin B homologous protein 1	CHP1
O60256	Phosphoribosyl pyrophosphate synthase-associated protein 2	PRPSAP2
Q99447	Ethanolamine-phosphate cytidylyltransferase	PCYT2
P17931	Galectin-3	LGALS3
A0A087X1G7	Selenoprotein F	SELENOF
P51398	28S ribosomal protein S29, mitochondrial	DAP3
Q96ST3	Paired amphipathic helix protein Sin3a	SIN3A
P41227	N-alpha-acetyltransferase 10	NAA10
Q8NBX0	Saccharopine dehydrogenase-like oxidoreductase	SCCPDH
Q14696	LRP chaperone MESD	MESD
D6RBQ9	Heterogeneous nuclear ribonucleoprotein D0 (Fragment)	HNRNPD
O15260	Surfeit locus protein 4	SURF4
H0Y990	ATP-binding cassette sub-family E member 1 (Fragment)	ABCE1
P43007	Neutral amino acid transporter A	SLC1A4
J3KP15	Serine/arginine-rich-splicing factor 2 (Fragment)	SRSF2
O43324	Eukaryotic translation elongation factor 1 epsilon-1	EEF1E1
P42126	Enoyl-CoA delta isomerase 1, mitochondrial	ECI1
G3V3G9	Uncharacterized protein
P07711	Cathepsin L1	CTSL
P42025	Beta-centractin	ACTR1B
Q04323	UBX domain-containing protein 1	UBXN1
Q96PU8	Protein quaking	QKI
O95758	Polypyrimidine tract-binding protein 3	PTBP3
Q16629	Serine/arginine-rich splicing factor 7	SRSF7
O95865	N(G),N(G)-dimethylarginine dimethylaminohydrolase 2	DDAH2
Q8IZ83	Aldehyde dehydrogenase family 16 member A1	ALDH16A1
Q7L7L0	Histone H2A type 3	HIST3H2A
P61353	60S ribosomal protein L27	RPL27
O14880	Microsomal glutathione S-transferase 3	MGST3
Q66K14	TBC1 domain family member 9B	TBC1D9B
P51571	Translocon-associated protein subunit delta	SSR4
Q16222	UDP-N-acetylhexosamine pyrophosphorylase	UAP1
F8W6L0	Ras GTPase-activating protein 4B	RASA4B
Q9BXW7	Haloacid dehalogenase-like hydrolase domain-containing 5	HDHD5
P49006	MARCKS-related protein	MARCKSL1
Q8WUA2	Peptidyl-prolyl cis-trans isomerase-like 4	PPIL4
D6RDG3	Transcription factor BTF3 (Fragment)	BTF3
Q9UN37	Vacuolar protein sorting-associated protein 4A	VPS4A
Q8TD19	Serine/threonine-protein kinase Nek9	NEK9
K7EMM8	Putative oxidoreductase GLYR1 (Fragment)	GLYR1
P10451	Osteopontin	SPP1
Q96AH8	Ras-related protein Rab-7b	RAB7B
Q12996	Cleavage stimulation factor subunit 3	CSTF3
O15479	Melanoma-associated antigen B2	MAGEB2
Q8NCE2	Myotubularin-related protein 14	MTMR14
Q9Y2Q5	Ragulator complex protein LAMTOR2	LAMTOR2
E7EV93	Pericentriolar material 1 protein (Fragment)	PCM1
P14735	Insulin-degrading enzyme	IDE
O75427	Leucine-rich repeat and calponin homology domain-containing protein 4	LRCH4
P32121	Beta-arrestin-2	ARRB2
Q9BZH6	WD repeat-containing protein 11	WDR11
A0A0A0MQR2	Replication termination factor 2	RTF2
Q9Y450	HBS1-like protein	HBS1L
Q9UBR2	Cathepsin Z	CTSZ
P78356	Phosphatidylinositol 5-phosphate 4-kinase type-2 beta	PIP4K2B
P55735	Protein SEC13 homolog	SEC13
Q9UIA0	Cytohesin-4	CYTH4
Q9NQ29	Putative RNA-binding protein Luc7-like 1	LUC7L
P11234	Ras-related protein Ral-B	RALB
O15427	Monocarboxylate transporter 4	SLC16A3
P61225	Ras-related protein Rap-2b	RAP2B
Q9H7D0	Dedicator of cytokinesis protein 5	DOCK5
O95372	Acyl-protein thioesterase 2	LYPLA2
Q92734	Protein TFG	TFG
O15498	Synaptobrevin homolog YKT6	YKT6
P18887	DNA repair protein XRCC1	XRCC1
Q96AB3	Isochorismatase domain-containing protein 2	ISOC2
A2ACR1	Proteasome subunit beta	PSMB9
O95881	Thioredoxin domain-containing protein 12	TXNDC12
P53990	IST1 homolog	IST1
O14976	Cyclin-G-associated kinase	GAK
P21926	CD9 antigen	CD9
O95487	Protein transport protein Sec24B	SEC24B
O43719	HIV Tat-specific factor 1	HTATSF1
Q9NZI8	Insulin-like growth factor 2 mRNA-binding protein 1	IGF2BP1
J3KP36	WASH complex subunit 2C	WASHC2C
P40222	Alpha-taxilin	TXLNA
Q5T0R8	Adenylyl cyclase-associated protein 1 (Fragment)	CAP1
P38117	Electron transfer flavoprotein subunit beta	ETFB
K7EK35	Signal transducer and activator of transcription	STAT5A
M0R2K9	Peptidylprolyl isomerase (Fragment)	FKBP8
E9PSI1	Transmembrane 9 superfamily member
Q9BRA2	Thioredoxin domain-containing protein 17	TXNDC17
Q9H9A5	CCR4-NOT transcription complex subunit 10	CNOT10
P29218	Inositol monophosphatase 1	IMPA1
Q13564	NEDD8-activating enzyme E1 regulatory subunit	NAE1
O14787	Transportin-2	TNPO2
Q96JC1	Vam6/Vps39-like protein	VPS39
Q9BYD6	39S ribosomal protein L1, mitochondrial	MRPL1
Q9P107	GEM-interacting protein	GMIP
P48163	NADP-dependent malic enzyme	ME1
Q00535	Cyclin-dependent-like kinase 5	CDK5
P84103	Serine/arginine-rich splicing factor 3	SRSF3
Q9Y639	Neuroplastin	NPTN
F8W7U3	WASH complex subunit 2A	WASHC2A
Q9UQ13	Leucine-rich repeat protein SHOC-2	SHOC2
P61769	Beta-2-microglobulin	B2M
Q15274	Nicotinate-nucleotide pyrophosphorylase [carboxylating]	QPRT
Q9NZL4	Hsp70-binding protein 1	HSPBP1
Q96QR8	Transcriptional activator protein Pur-beta	PURB
Q7Z6I6	Rho GTPase-activating protein 30	ARHGAP30
Q8WVY7	Ubiquitin-like domain-containing CTD phosphatase 1	UBLCP1
G5EA09	Syndecan binding protein (Syntenin), isoform CRA_a	SDCBP
Q92520	Protein FAM3C	FAM3C
P04839	Cytochrome b-245 heavy chain	CYBB
Q02338	D-beta-hydroxybutyrate dehydrogenase, mitochondrial	BDH1
Q9NZD8	Maspardin	SPG21
F8WAN9	GMP reductase	GMPR2
P16333	Cytoplasmic protein NCK1	NCK1
P16402	Histone H1.3	HIST1H1D
A8MZF9	Developmentally-regulated GTP-binding protein 2	DRG2
Q9BVG4	Protein PBDC1	PBDC1
C9JRZ6	MICOS complex subunit	CHCHD3
Q9UJ68	Mitochondrial peptide methionine sulfoxide reductase	MSRA
Q92947	Glutaryl-CoA dehydrogenase, mitochondrial	GCDH
Q9UHY7	Enolase-phosphatase E1	ENOPH1
P62318	Small nuclear ribonucleoprotein Sm D3	SNRPD3
Q5JR04	Helicase MOV-10	MOV10
P35269	General transcription factor IIF subunit 1	GTF2F1
O95379	Tumor necrosis factor alpha-induced protein 8	TNFAIP8
Q9NP61	ADP-ribosylation factor GTPase-activating protein 3	ARFGAP3
Q92925	SWI/SNF-related matrix-associated actin-dependent regulator of chromatin subfamily D member 2	SMARCD2
F8W9P4	Phosphatidylinositol 4,5-bisphosphate 3-kinase catalytic subunit	PIK3CD
P18077	60S ribosomal protein L35a	RPL35A
Q9UIQ6	Leucyl-cystinyl aminopeptidase	LNPEP
P62314	Small nuclear ribonucleoprotein Sm D1	SNRPD1
Q15417	Calponin-3	CNN3
Q9H488	GDP-fucose protein O-fucosyltransferase 1	POFUT1
H0YJ34	Fermitin family homolog 2 (Fragment)	FERMT2
A1L0T0	Acetolactate synthase-like protein	ILVBL
P06493	Cyclin-dependent kinase 1	CDK1
P13984	General transcription factor IIF subunit 2	GTF2F2
Q9H9A6	Leucine-rich repeat-containing protein 40	LRRC40
Q14257	Reticulocalbin-2	RCN2
A0A0G2JH37	Tapasin	TAPBP
O14737	Programmed cell death protein 5	PDCD5
Q5T6V5	Queuosine salvage protein	C9orf64
Q14914	Prostaglandin reductase 1	PTGR1
Q5T8P6	RNA-binding protein 26	RBM26
P36915	Guanine nucleotide-binding protein-like 1	GNL1
Q9HAV7	GrpE protein homolog 1, mitochondrial	GRPEL1
Q13243	Serine/arginine-rich splicing factor 5	SRSF5
P04424	Argininosuccinate lyase	ASL
Q99747	Gamma-soluble NSF attachment protein	NAPG
O75367	Core histone macro-H2A.1	H2AFY
Q8WVV9	Heterogeneous nuclear ribonucleoprotein L-like	HNRNPLL
Q5VT52	Regulation of nuclear pre-mRNA domain-containing protein 2	RPRD2
F5H345	Porphobilinogen deaminase	HMBS
S4R3N1	HSPE1-MOB4 readthrough	HSPE1-MOB4
F5H5I6	G-rich sequence factor 1	GRSF1
O00461	Golgi integral membrane protein 4	GOLIM4
P62851	40S ribosomal protein S25	RPS25
P46779	60S ribosomal protein L28	RPL28
Q13363	C-terminal-binding protein 1	CTBP1
P13807	Glycogen [starch] synthase, muscle	GYS1
O95292	Vesicle-associated membrane protein-associated protein B/C	VAPB
Q14195	Dihydropyrimidinase-related protein 3	DPYSL3
P49841	Glycogen synthase kinase-3 beta	GSK3B
Q96IJ6	Mannose-1-phosphate guanyltransferase alpha	GMPPA
Q86TU7	Actin-histidine N-methyltransferase	SETD3
O75886	Signal transducing adapter molecule 2	STAM2
P42768	Wiskott-Aldrich syndrome protein	WAS
Q8N684	Cleavage and polyadenylation specificity factor subunit 7	CPSF7
H7C4T5	Muscleblind-like protein 1 (Fragment)	MBNL1
K7ESF4	Uncharacterized protein (Fragment)
Q9NZB2	Constitutive coactivator of PPAR-gamma-like protein 1	FAM120A
Q8NBZ7	UDP-glucuronic acid decarboxylase 1	UXS1
P50440	Glycine amidinotransferase, mitochondrial	GATM
M0QXN5	Nuclear pore glycoprotein p62	NUP62
Q96EP5	DAZ-associated protein 1	DAZAP1
Q9H832	Ubiquitin-conjugating enzyme E2 Z	UBE2Z
P10644	cAMP-dependent protein kinase type I-alpha regulatory subunit	PRKAR1A
P26885	Peptidyl-prolyl cis-trans isomerase FKBP2	FKBP2
Q14651	Plastin-1	PLS1
Q8IZP0	Abl interactor 1	ABI1
Q9BWF3	RNA-binding protein 4	RBM4
Q969S3	Zinc finger protein 622	ZNF622
Q9BY43	Charged multivesicular body protein 4a	CHMP4A
Q86VM9	Zinc finger CCCH domain-containing protein 18	ZC3H18
Q16740	ATP-dependent Clp protease proteolytic subunit, mitochondrial	CLPP
Q8TC07	TBC1 domain family member 15	TBC1D15
Q9P0J0	NADH dehydrogenase [ubiquinone] 1 alpha subcomplex subunit 13	NDUFA13
P52594	Arf-GAP domain and FG repeat-containing protein 1	AGFG1
Q96BX8	MOB kinase activator 3A	MOB3A
P40306	Proteasome subunit beta type-10	PSMB10
P62854	40S ribosomal protein S26	RPS26
Q5T9A4	ATPase family AAA domain-containing protein 3B	ATAD3B
Q9UI10	Translation initiation factor eIF-2B subunit delta	EIF2B4
P49754	Vacuolar protein sorting-associated protein 41 homolog	VPS41
Q9NY27	Serine/threonine-protein phosphatase 4 regulatory subunit 2	PPP4R2
O60573	Eukaryotic translation initiation factor 4E type 2	EIF4E2
O94822	E3 ubiquitin-protein ligase listerin	LTN1
Q9GZL7	Ribosome biogenesis protein WDR12	WDR12
E9PRJ8	Tetraspanin (Fragment)	CD81
P35573	Glycogen debranching enzyme	AGL
Q9HC35	Echinoderm microtubule-associated protein-like 4	EML4
P23634	Plasma membrane calcium-transporting ATPase 4	ATP2B4
P48729	Casein kinase I isoform alpha	CSNK1A1
E9PCW1	Golgi SNAP receptor complex member 1	GOSR1
Q92665	28S ribosomal protein S31, mitochondrial	MRPS31
A0A3B3ISW7	Vacuolar protein-sorting-associated protein 36	VPS36
P23921	Ribonucleoside-diphosphate reductase large subunit	RRM1
Q9H444	Charged multivesicular body protein 4b	CHMP4B
P67870	Casein kinase II subunit beta	CSNK2B
P53367	Arfaptin-1	ARFIP1
Q9Y315	Deoxyribose-phosphate aldolase	DERA
Q9H1B7	Interferon regulatory factor 2-binding protein-like	IRF2BPL
Q9Y2U8	Inner nuclear membrane protein Man1	LEMD3
A6NHL2	Tubulin alpha chain-like 3	TUBAL3
A8MYT4	Phosphatidylinositol 3-kinase catalytic subunit type 3	PIK3C3
O14828	Secretory carrier-associated membrane protein 3	SCAMP3
Q9BPW8	Protein NipSnap homolog 1	NIPSNAP1
C9JZR2	Catenin delta-1	CTNND1
P61513	60S ribosomal protein L37a	RPL37A
Q4G0N4	NAD kinase 2, mitochondrial	NADK2
Q92556	Engulfment and cell motility protein 1	ELMO1
D6RHI9	Ribonuclease T2 (Fragment)	RNASET2
Q9UK41	Vacuolar protein sorting-associated protein 28 homolog	VPS28
P57740	Nuclear pore complex protein Nup107	NUP107
Q9H6Z4	Ran-binding protein 3	RANBP3
O75251	NADH dehydrogenase [ubiquinone] iron-sulfur protein 7, mitochondrial	NDUFS7
Q9ULH1	Arf-GAP with SH3 domain, ANK repeat and PH domain-containing protein 1	ASAP1
Q9NPI6	mRNA-decapping enzyme 1A	DCP1A
Q7Z417	Nuclear fragile X mental retardation-interacting protein 2	NUFIP2
P49458	Signal recognition particle 9 kDa protein	SRP9
O60306	RNA helicase aquarius	AQR
O00161	Synaptosomal-associated protein 23	SNAP23
Q9Y6I9	Testis-expressed protein 264	TEX264
Q16718	NADH dehydrogenase [ubiquinone] 1 alpha subcomplex subunit 5	NDUFA5
Q9UBX3	Mitochondrial dicarboxylate carrier	SLC25A10
E9PG73	Peptidyl-prolyl cis-trans isomerase G	PPIG
Q14746	Conserved oligomeric Golgi complex subunit 2	COG2
P10619	Lysosomal protective protein	CTSA
P28161	Glutathione S-transferase Mu 2	GSTM2
O95340	Bifunctional 3'-phosphoadenosine 5'-phosphosulfate synthase 2	PAPSS2
O60234	Glia maturation factor gamma	GMFG
P02538	Keratin, type II cytoskeletal 6A	KRT6A
P48775	Tryptophan 2,3-dioxygenase	TDO2
P49023	Paxillin	PXN
Q96SQ9	Cytochrome P450 2S1	CYP2S1
Q5GLZ8	Probable E3 ubiquitin-protein ligase HERC4	HERC4
O15400	Syntaxin-7	STX7
Q15746	Myosin light chain kinase, smooth muscle	MYLK
O00273	DNA fragmentation factor subunit alpha	DFFA
Q9Y333	U6 snRNA-associated Sm-like protein LSm2	LSM2
O43617	Trafficking protein particle complex subunit 3	TRAPPC3
E9PDP5	Ankyrin repeat and KH domain-containing protein 1 (Fragment)	ANKHD1
P05114	Non-histone chromosomal protein HMG-14	HMGN1
Q5VTR2	E3 ubiquitin-protein ligase BRE1A	RNF20
Q9UBI1	COMM domain-containing protein 3	COMMD3
A0A087WZF1	Lipoma-preferred partner	LPP
Q9Y4X5	E3 ubiquitin-protein ligase ARIH1	ARIH1
P61254	60S ribosomal protein L26	RPL26
Q8IWX8	Calcium homeostasis endoplasmic reticulum protein	CHERP
O75179	Ankyrin repeat domain-containing protein 17	ANKRD17
P13647	Keratin, type II cytoskeletal 5	KRT5
Q03169	Tumor necrosis factor alpha-induced protein 2	TNFAIP2
Q9UHG3	Prenylcysteine oxidase 1	PCYOX1
Q9UHX3	Adhesion G protein-coupled receptor E2	ADGRE2
Q15370	Elongin-B	ELOB
P40616	ADP-ribosylation factor-like protein 1	ARL1
Q15751	Probable E3 ubiquitin-protein ligase HERC1	HERC1
Q7RTV0	PHD finger-like domain-containing protein 5A	PHF5A
P11182	Lipoamide acyltransferase component of branched-chain alpha-keto acid dehydrogenase complex, mitochondrial	DBT
Q9UKD2	mRNA turnover protein 4 homolog	MRTO4
Q6IAA8	Ragulator complex protein LAMTOR1	LAMTOR1
Q9P1F3	Costars family protein ABRACL	ABRACL
A0A3B3ISZ0	Acylglycerol kinase, mitochondrial	AGK
Q6P589	Tumor necrosis factor alpha-induced protein 8-like protein 2	TNFAIP8L2
O60832	H/ACA ribonucleoprotein complex subunit DKC1	DKC1
Q01650	Large neutral amino acids transporter small subunit 1	SLC7A5
Q92878	DNA repair protein RAD50	RAD50
Q9BRX8	Peroxiredoxin-like 2A	PRXL2A
Q9H2U1	ATP-dependent DNA/RNA helicase DHX36	DHX36
A0A3B3IRL5	Inosine-5'-monophosphate dehydrogenase (Fragment)	IMPDH1
P49207	60S ribosomal protein L34	RPL34
Q08AF3	Schlafen family member 5	SLFN5
O15305	Phosphomannomutase 2	PMM2
P09601	Heme oxygenase 1	HMOX1
A0A0C4DGX4	Cullin-1	CUL1
Q93008	Probable ubiquitin carboxyl-terminal hydrolase FAF-X	USP9X
Q13620	Cullin-4B	CUL4B
Q92890	Ubiquitin recognition factor in ER-associated degradation protein 1	UFD1
Q99856	AT-rich interactive domain-containing protein 3A	ARID3A
Q9H0E2	Toll-interacting protein	TOLLIP
[truncated: 1,866 more rows]
