# Supplementary material for: The Emerging Plasticizer Alternative DINCH and Its Metabolite MINCH Induce Oxidative Stress and Enhance Inflammatory Responses in Human THP-1 Macrophages
Source: Cells. 2021 Sep 9;10(9):2367. doi: 10.3390/cells10092367 (PMC8466537; doi:10.3390/cells10092367)
Supplement: Supplementary file 1 [file cells-10-02367-s001.zip › Supplement 7.csv]

	pvalue	zscore	Order	Cluster	Treatment	Module	Pathway
1	0	NA	35	12	4h_ctrlLPS_ctrlnoLPS	4h_ctrlnoLPS_pvalue	?-Adrenergic Signaling
2	0.07760435	NA	164	28	4h_ctrlLPS_ctrlnoLPS	4h_ctrlnoLPS_pvalue	?-glutamyl Cycle
3	0.291365443	NA	221	29	4h_ctrlLPS_ctrlnoLPS	4h_ctrlnoLPS_pvalue	?-linolenate Biosynthesis II (Animals)
4	0	NA	26	7	4h_ctrlLPS_ctrlnoLPS	4h_ctrlnoLPS_pvalue	14-3-3-mediated Signaling
5	0.266147711	NA	211	28	4h_ctrlLPS_ctrlnoLPS	4h_ctrlnoLPS_pvalue	2-ketoglutarate Dehydrogenase Complex
6	0.297199677	0.905	57	11	4h_ctrlLPS_ctrlnoLPS	4h_ctrlnoLPS_pvalue	3-phosphoinositide Biosynthesis
7	0	NA	219	28	4h_ctrlLPS_ctrlnoLPS	4h_ctrlnoLPS_pvalue	4-1BB Signaling in T Lymphocytes
8	0	NA	110	28	4h_ctrlLPS_ctrlnoLPS	4h_ctrlnoLPS_pvalue	Acetyl-CoA Biosynthesis I (Pyruvate Dehydrogenase Complex)
9	0	NA	108	28	4h_ctrlLPS_ctrlnoLPS	4h_ctrlnoLPS_pvalue	Acetyl-CoA Biosynthesis III (from Citrate)
10	1.028890945	3	58	16	4h_ctrlLPS_ctrlnoLPS	4h_ctrlnoLPS_pvalue	Actin Cytoskeleton Signaling
11	0.568235562	1.633	81	13	4h_ctrlLPS_ctrlnoLPS	4h_ctrlnoLPS_pvalue	Actin Nucleation by ARP-WASP Complex
12	0.300531114	1.342	21	11	4h_ctrlLPS_ctrlnoLPS	4h_ctrlnoLPS_pvalue	Activation of IRF by Cytosolic Pattern Recognition Receptors
13	0	NA	267	23	4h_ctrlLPS_ctrlnoLPS	4h_ctrlnoLPS_pvalue	Acute Myeloid Leukemia Signaling
14	1.359146672	NA	180	28	4h_ctrlLPS_ctrlnoLPS	4h_ctrlnoLPS_pvalue	Adenine and Adenosine Salvage I
15	0.178469356	NA	117	28	4h_ctrlLPS_ctrlnoLPS	4h_ctrlnoLPS_pvalue	Adenine and Adenosine Salvage III
16	0.549518193	NA	165	28	4h_ctrlLPS_ctrlnoLPS	4h_ctrlnoLPS_pvalue	Adenine and Adenosine Salvage VI
17	0.051544362	NA	56	28	4h_ctrlLPS_ctrlnoLPS	4h_ctrlnoLPS_pvalue	Agranulocyte Adhesion and Diapedesis
18	0.178469356	2.236	84	13	4h_ctrlLPS_ctrlnoLPS	4h_ctrlnoLPS_pvalue	Agrin Interactions at Neuromuscular Junction
19	0.271520487	NA	233	28	4h_ctrlLPS_ctrlnoLPS	4h_ctrlnoLPS_pvalue	Aldosterone Signaling in Epithelial Cells
20	0.242158015	NA	64	24	4h_ctrlLPS_ctrlnoLPS	4h_ctrlnoLPS_pvalue	Amyloid Processing
21	0	NA	286	20	4h_ctrlLPS_ctrlnoLPS	4h_ctrlnoLPS_pvalue	Angiopoietin Signaling
22	0.340565951	NA	72	28	4h_ctrlLPS_ctrlnoLPS	4h_ctrlnoLPS_pvalue	Antigen Presentation Pathway
23	0	NA	270	27	4h_ctrlLPS_ctrlnoLPS	4h_ctrlnoLPS_pvalue	Antioxidant Action of Vitamin C
24	0	NA	279	27	4h_ctrlLPS_ctrlnoLPS	4h_ctrlnoLPS_pvalue	Antiproliferative Role of Somatostatin Receptor 2
25	0.731211843	0.707	280	26	4h_ctrlLPS_ctrlnoLPS	4h_ctrlnoLPS_pvalue	Apelin Adipocyte Signaling Pathway
26	0	NA	278	20	4h_ctrlLPS_ctrlnoLPS	4h_ctrlnoLPS_pvalue	Apelin Cardiomyocyte Signaling Pathway
27	0	NA	287	27	4h_ctrlLPS_ctrlnoLPS	4h_ctrlnoLPS_pvalue	Apelin Endothelial Signaling Pathway
28	0	NA	293	28	4h_ctrlLPS_ctrlnoLPS	4h_ctrlnoLPS_pvalue	Apoptosis Signaling
29	0.767779739	NA	85	28	4h_ctrlLPS_ctrlnoLPS	4h_ctrlnoLPS_pvalue	Arginine Biosynthesis IV
30	0.266147711	NA	101	28	4h_ctrlLPS_ctrlnoLPS	4h_ctrlnoLPS_pvalue	Arsenate Detoxification I (Glutaredoxin)
31	0.746574009	-0.816	253	28	4h_ctrlLPS_ctrlnoLPS	4h_ctrlnoLPS_pvalue	Aryl Hydrocarbon Receptor Signaling
32	0.549518193	NA	207	28	4h_ctrlLPS_ctrlnoLPS	4h_ctrlnoLPS_pvalue	Asparagine Biosynthesis I
33	0.297199677	NA	195	28	4h_ctrlLPS_ctrlnoLPS	4h_ctrlnoLPS_pvalue	Aspartate Biosynthesis
34	0.673759087	NA	128	28	4h_ctrlLPS_ctrlnoLPS	4h_ctrlnoLPS_pvalue	Aspartate Degradation II
35	0.291365443	NA	149	28	4h_ctrlLPS_ctrlnoLPS	4h_ctrlnoLPS_pvalue	Atherosclerosis Signaling
36	0.266147711	-1.342	19	18	4h_ctrlLPS_ctrlnoLPS	4h_ctrlnoLPS_pvalue	ATM Signaling
37	0.918216976	NA	143	28	4h_ctrlLPS_ctrlnoLPS	4h_ctrlnoLPS_pvalue	Autophagy
38	0	NA	42	28	4h_ctrlLPS_ctrlnoLPS	4h_ctrlnoLPS_pvalue	Axonal Guidance Signaling
39	0	0	177	12	4h_ctrlLPS_ctrlnoLPS	4h_ctrlnoLPS_pvalue	B Cell Receptor Signaling
40	1.35308633	-1.89	76	4	4h_ctrlLPS_ctrlnoLPS	4h_ctrlnoLPS_pvalue	BAG2 Signaling Pathway
41	0.319564787	NA	206	28	4h_ctrlLPS_ctrlnoLPS	4h_ctrlnoLPS_pvalue	BER pathway
42	0.858797462	NA	113	28	4h_ctrlLPS_ctrlnoLPS	4h_ctrlnoLPS_pvalue	Bile Acid Biosynthesis, Neutral Pathway
43	0	NA	144	28	4h_ctrlLPS_ctrlnoLPS	4h_ctrlnoLPS_pvalue	Branched-chain ?-keto acid Dehydrogenase Complex
44	0	NA	243	28	4h_ctrlLPS_ctrlnoLPS	4h_ctrlnoLPS_pvalue	Calcium-induced T Lymphocyte Apoptosis
45	0	0.816	290	25	4h_ctrlLPS_ctrlnoLPS	4h_ctrlnoLPS_pvalue	Cardiac Hypertrophy Signaling
46	1.17197144	NA	204	28	4h_ctrlLPS_ctrlnoLPS	4h_ctrlnoLPS_pvalue	Caveolar-mediated Endocytosis Signaling
47	0	NA	89	12	4h_ctrlLPS_ctrlnoLPS	4h_ctrlnoLPS_pvalue	CCR3 Signaling in Eosinophils
48	0	NA	260	27	4h_ctrlLPS_ctrlnoLPS	4h_ctrlnoLPS_pvalue	CD27 Signaling in Lymphocytes
49	0	1	182	27	4h_ctrlLPS_ctrlnoLPS	4h_ctrlnoLPS_pvalue	CD28 Signaling in T Helper Cells
50	0	NA	251	29	4h_ctrlLPS_ctrlnoLPS	4h_ctrlnoLPS_pvalue	CD40 Signaling
51	0.475411296	1.89	73	13	4h_ctrlLPS_ctrlnoLPS	4h_ctrlnoLPS_pvalue	Cdc42 Signaling
52	0	NA	59	12	4h_ctrlLPS_ctrlnoLPS	4h_ctrlnoLPS_pvalue	CDK5 Signaling
53	0.178469356	-1	10	21	4h_ctrlLPS_ctrlnoLPS	4h_ctrlnoLPS_pvalue	Cell Cycle Control of Chromosomal Replication
54	0	NA	218	28	4h_ctrlLPS_ctrlnoLPS	4h_ctrlnoLPS_pvalue	Cell Cycle: G2/M DNA Damage Checkpoint Regulation
55	0	NA	291	27	4h_ctrlLPS_ctrlnoLPS	4h_ctrlnoLPS_pvalue	Ceramide Signaling
56	0	NA	271	20	4h_ctrlLPS_ctrlnoLPS	4h_ctrlnoLPS_pvalue	Chemokine Signaling
57	0	1	163	26	4h_ctrlLPS_ctrlnoLPS	4h_ctrlnoLPS_pvalue	Cholecystokinin/Gastrin-mediated Signaling
58	0.297199677	NA	115	28	4h_ctrlLPS_ctrlnoLPS	4h_ctrlnoLPS_pvalue	Cholesterol Biosynthesis I
59	0.297199677	NA	176	28	4h_ctrlLPS_ctrlnoLPS	4h_ctrlnoLPS_pvalue	Cholesterol Biosynthesis II (via 24,25-dihydrolanosterol)
60	0.297199677	NA	95	28	4h_ctrlLPS_ctrlnoLPS	4h_ctrlnoLPS_pvalue	Cholesterol Biosynthesis III (via Desmosterol)
61	0	NA	145	28	4h_ctrlLPS_ctrlnoLPS	4h_ctrlnoLPS_pvalue	Chronic Myeloid Leukemia Signaling
62	0.767779739	NA	140	28	4h_ctrlLPS_ctrlnoLPS	4h_ctrlnoLPS_pvalue	Citrulline-Nitric Oxide Cycle
63	0.767779739	NA	130	28	4h_ctrlLPS_ctrlnoLPS	4h_ctrlnoLPS_pvalue	Citrulline Biosynthesis
64	4.232234027	NA	190	28	4h_ctrlLPS_ctrlnoLPS	4h_ctrlnoLPS_pvalue	Clathrin-mediated Endocytosis Signaling
65	2.73733721	-1.606	83	17	4h_ctrlLPS_ctrlnoLPS	4h_ctrlnoLPS_pvalue	Coronavirus Pathogenesis Pathway
66	0.878486736	NA	173	28	4h_ctrlLPS_ctrlnoLPS	4h_ctrlnoLPS_pvalue	Creatine-phosphate Biosynthesis
67	0	NA	75	7	4h_ctrlLPS_ctrlnoLPS	4h_ctrlnoLPS_pvalue	CREB Signaling in Neurons
68	0.802731687	NA	114	28	4h_ctrlLPS_ctrlnoLPS	4h_ctrlnoLPS_pvalue	CTLA4 Signaling in Cytotoxic T Lymphocytes
69	0	0.447	40	27	4h_ctrlLPS_ctrlnoLPS	4h_ctrlnoLPS_pvalue	CXCR4 Signaling
70	0.407258102	0.905	39	11	4h_ctrlLPS_ctrlnoLPS	4h_ctrlnoLPS_pvalue	D-myo-inositol-5-phosphate Metabolism
71	0	NA	29	24	4h_ctrlLPS_ctrlnoLPS	4h_ctrlnoLPS_pvalue	D-myo-inositol (1,4,5)-Trisphosphate Biosynthesis
72	0.549518193	0.905	147	11	4h_ctrlLPS_ctrlnoLPS	4h_ctrlnoLPS_pvalue	D-myo-inositol (1,4,5,6)-Tetrakisphosphate Biosynthesis
73	0.549518193	0.905	133	11	4h_ctrlLPS_ctrlnoLPS	4h_ctrlnoLPS_pvalue	D-myo-inositol (3,4,5,6)-tetrakisphosphate Biosynthesis
74	0.475411296	1.134	255	28	4h_ctrlLPS_ctrlnoLPS	4h_ctrlnoLPS_pvalue	Death Receptor Signaling
75	1.251021216	NA	208	28	4h_ctrlLPS_ctrlnoLPS	4h_ctrlnoLPS_pvalue	DNA Double-Strand Break Repair by Non-Homologous End Joining
76	0.408745184	NA	226	20	4h_ctrlLPS_ctrlnoLPS	4h_ctrlnoLPS_pvalue	Dopamine Degradation
77	11.88022019	4.707	20	5	4h_ctrlLPS_ctrlnoLPS	4h_ctrlnoLPS_pvalue	EIF2 Signaling
78	0	NA	23	20	4h_ctrlLPS_ctrlnoLPS	4h_ctrlnoLPS_pvalue	Endocannabinoid Neuronal Synapse Pathway
79	0.44875835	NA	222	20	4h_ctrlLPS_ctrlnoLPS	4h_ctrlnoLPS_pvalue	Endoplasmic Reticulum Stress Pathway
80	0.045060106	NA	184	20	4h_ctrlLPS_ctrlnoLPS	4h_ctrlnoLPS_pvalue	Ephrin B Signaling
81	0	1.134	1	7	4h_ctrlLPS_ctrlnoLPS	4h_ctrlnoLPS_pvalue	Ephrin Receptor Signaling
82	0.039311385	NA	192	28	4h_ctrlLPS_ctrlnoLPS	4h_ctrlnoLPS_pvalue	Epithelial Adherens Junction Signaling
83	0.010715006	1.667	31	19	4h_ctrlLPS_ctrlnoLPS	4h_ctrlnoLPS_pvalue	ERK/MAPK Signaling
84	0	NA	186	28	4h_ctrlLPS_ctrlnoLPS	4h_ctrlnoLPS_pvalue	Erythropoietin Signaling
85	0.045060106	NA	229	28	4h_ctrlLPS_ctrlnoLPS	4h_ctrlnoLPS_pvalue	Estrogen-Dependent Breast Cancer Signaling
86	0.536589304	-2	295	22	4h_ctrlLPS_ctrlnoLPS	4h_ctrlnoLPS_pvalue	Estrogen Biosynthesis
87	0.022861092	1.069	273	26	4h_ctrlLPS_ctrlnoLPS	4h_ctrlnoLPS_pvalue	Estrogen Receptor Signaling
88	0.218238428	NA	227	20	4h_ctrlLPS_ctrlnoLPS	4h_ctrlnoLPS_pvalue	Ethanol Degradation IV
89	0.284859573	NA	154	28	4h_ctrlLPS_ctrlnoLPS	4h_ctrlnoLPS_pvalue	FAK Signaling
90	1.034739995	NA	237	26	4h_ctrlLPS_ctrlnoLPS	4h_ctrlnoLPS_pvalue	FAT10 Signaling Pathway
91	2.0785636	0.378	247	26	4h_ctrlLPS_ctrlnoLPS	4h_ctrlnoLPS_pvalue	Fatty Acid ?-oxidation I
92	0	NA	104	28	4h_ctrlLPS_ctrlnoLPS	4h_ctrlnoLPS_pvalue	Fatty Acid Activation
93	0.408745184	2.121	53	16	4h_ctrlLPS_ctrlnoLPS	4h_ctrlnoLPS_pvalue	Fc? Receptor-mediated Phagocytosis in Macrophages and Monocytes
94	0.006504368	2	102	19	4h_ctrlLPS_ctrlnoLPS	4h_ctrlnoLPS_pvalue	FLT3 Signaling in Hematopoietic Progenitor Cells
95	0	1.342	15	13	4h_ctrlLPS_ctrlnoLPS	4h_ctrlnoLPS_pvalue	fMLP Signaling in Neutrophils
96	0.218238428	NA	178	28	4h_ctrlLPS_ctrlnoLPS	4h_ctrlnoLPS_pvalue	Folate Polyglutamylation
97	0	NA	71	6	4h_ctrlLPS_ctrlnoLPS	4h_ctrlnoLPS_pvalue	G Beta Gamma Signaling
98	0	NA	109	28	4h_ctrlLPS_ctrlnoLPS	4h_ctrlnoLPS_pvalue	G Protein Signaling Mediated by Tubby
99	0	0	262	28	4h_ctrlLPS_ctrlnoLPS	4h_ctrlnoLPS_pvalue	G?q Signaling
100	0	NA	201	28	4h_ctrlLPS_ctrlnoLPS	4h_ctrlnoLPS_pvalue	Galactose Degradation I (Leloir Pathway)
101	0	NA	209	28	4h_ctrlLPS_ctrlnoLPS	4h_ctrlnoLPS_pvalue	Gap Junction Signaling
102	0	NA	254	23	4h_ctrlLPS_ctrlnoLPS	4h_ctrlnoLPS_pvalue	GDNF Family Ligand-Receptor Interactions
103	0.459194666	NA	213	28	4h_ctrlLPS_ctrlnoLPS	4h_ctrlnoLPS_pvalue	GDP-glucose Biosynthesis
104	0.218238428	NA	191	28	4h_ctrlLPS_ctrlnoLPS	4h_ctrlnoLPS_pvalue	Germ Cell-Sertoli Cell Junction Signaling
105	0	NA	111	23	4h_ctrlLPS_ctrlnoLPS	4h_ctrlnoLPS_pvalue	Glioblastoma Multiforme Signaling
106	0.3297386	1.342	43	26	4h_ctrlLPS_ctrlnoLPS	4h_ctrlnoLPS_pvalue	Glioma Invasiveness Signaling
107	0	NA	38	12	4h_ctrlLPS_ctrlnoLPS	4h_ctrlnoLPS_pvalue	Glioma Signaling
108	0.291365443	NA	188	28	4h_ctrlLPS_ctrlnoLPS	4h_ctrlnoLPS_pvalue	Glucocorticoid Receptor Signaling
109	4.773196149	2.333	2	9	4h_ctrlLPS_ctrlnoLPS	4h_ctrlnoLPS_pvalue	Gluconeogenesis I
110	0.459194666	NA	214	28	4h_ctrlLPS_ctrlnoLPS	4h_ctrlnoLPS_pvalue	Glucose and Glucose-1-phosphate Degradation
111	0.297199677	NA	212	28	4h_ctrlLPS_ctrlnoLPS	4h_ctrlnoLPS_pvalue	Glutamate Degradation II
112	0.549518193	NA	66	28	4h_ctrlLPS_ctrlnoLPS	4h_ctrlnoLPS_pvalue	Glutamate Removal from Folates
113	0.549518193	NA	185	28	4h_ctrlLPS_ctrlnoLPS	4h_ctrlnoLPS_pvalue	Glutamine Degradation I
114	1.727524617	1	266	13	4h_ctrlLPS_ctrlnoLPS	4h_ctrlnoLPS_pvalue	Glutaryl-CoA Degradation
115	0.855634588	0	228	20	4h_ctrlLPS_ctrlnoLPS	4h_ctrlnoLPS_pvalue	Glutathione-mediated Detoxification
116	1.448095788	0.447	155	11	4h_ctrlLPS_ctrlnoLPS	4h_ctrlnoLPS_pvalue	Glutathione Redox Reactions I
117	0.266147711	NA	153	28	4h_ctrlLPS_ctrlnoLPS	4h_ctrlnoLPS_pvalue	Glutathione Redox Reactions II
118	0	NA	210	28	4h_ctrlLPS_ctrlnoLPS	4h_ctrlnoLPS_pvalue	Glycine Cleavage Complex
119	0.673759087	NA	171	28	4h_ctrlLPS_ctrlnoLPS	4h_ctrlnoLPS_pvalue	Glycogen Biosynthesis II (from UDP-D-Glucose)
120	1.8229001	1	92	11	4h_ctrlLPS_ctrlnoLPS	4h_ctrlnoLPS_pvalue	Glycogen Degradation II
121	1.535816439	1	45	11	4h_ctrlLPS_ctrlnoLPS	4h_ctrlnoLPS_pvalue	Glycogen Degradation III
122	5.867715056	3.162	24	3	4h_ctrlLPS_ctrlnoLPS	4h_ctrlnoLPS_pvalue	Glycolysis I
123	0	NA	16	12	4h_ctrlLPS_ctrlnoLPS	4h_ctrlnoLPS_pvalue	GM-CSF Signaling
124	0	NA	17	7	4h_ctrlLPS_ctrlnoLPS	4h_ctrlnoLPS_pvalue	GNRH Signaling
125	0	NA	250	27	4h_ctrlLPS_ctrlnoLPS	4h_ctrlnoLPS_pvalue	GPCR-Mediated Integration of Enteroendocrine Signaling Exemplified by an L Cell
126	1.17197144	NA	150	28	4h_ctrlLPS_ctrlnoLPS	4h_ctrlnoLPS_pvalue	Granzyme A Signaling
127	1.103740724	-1	252	22	4h_ctrlLPS_ctrlnoLPS	4h_ctrlnoLPS_pvalue	Granzyme B Signaling
128	0.374816406	NA	107	28	4h_ctrlLPS_ctrlnoLPS	4h_ctrlnoLPS_pvalue	Guanine and Guanosine Salvage I
129	0.266147711	NA	129	28	4h_ctrlLPS_ctrlnoLPS	4h_ctrlnoLPS_pvalue	Heme Biosynthesis from Uroporphyrinogen-III I
130	0	NA	99	28	4h_ctrlLPS_ctrlnoLPS	4h_ctrlnoLPS_pvalue	Heme Degradation
131	0.732849234	3	30	9	4h_ctrlLPS_ctrlnoLPS	4h_ctrlnoLPS_pvalue	HIF1? Signaling
132	0.242158015	NA	44	10	4h_ctrlLPS_ctrlnoLPS	4h_ctrlnoLPS_pvalue	HIPPO signaling
133	0.03390184	1.134	139	26	4h_ctrlLPS_ctrlnoLPS	4h_ctrlnoLPS_pvalue	HMGB1 Signaling
134	0.878486736	-2	294	22	4h_ctrlLPS_ctrlnoLPS	4h_ctrlnoLPS_pvalue	Huntington's Disease Signaling
135	0.764500571	NA	162	28	4h_ctrlLPS_ctrlnoLPS	4h_ctrlnoLPS_pvalue	Hypoxia Signaling in the Cardiovascular System
136	0	NA	116	28	4h_ctrlLPS_ctrlnoLPS	4h_ctrlnoLPS_pvalue	Hypusine Biosynthesis
137	0	NA	283	27	4h_ctrlLPS_ctrlnoLPS	4h_ctrlnoLPS_pvalue	iCOS-iCOSL Signaling in T Helper Cells
138	0	0	272	27	4h_ctrlLPS_ctrlnoLPS	4h_ctrlnoLPS_pvalue	IGF-1 Signaling
139	0.022861092	NA	160	28	4h_ctrlLPS_ctrlnoLPS	4h_ctrlnoLPS_pvalue	IL-12 Signaling and Production in Macrophages
140	0	NA	269	26	4h_ctrlLPS_ctrlnoLPS	4h_ctrlnoLPS_pvalue	IL-15 Signaling
141	0	NA	282	23	4h_ctrlLPS_ctrlnoLPS	4h_ctrlnoLPS_pvalue	IL-3 Signaling
142	0	NA	202	28	4h_ctrlLPS_ctrlnoLPS	4h_ctrlnoLPS_pvalue	IL-4 Signaling
143	0.314830167	1.387	183	27	4h_ctrlLPS_ctrlnoLPS	4h_ctrlnoLPS_pvalue	IL-8 Signaling
144	0.022861092	NA	274	26	4h_ctrlLPS_ctrlnoLPS	4h_ctrlnoLPS_pvalue	IL-9 Signaling
145	0.06634091	1.414	69	13	4h_ctrlLPS_ctrlnoLPS	4h_ctrlnoLPS_pvalue	ILK Signaling
146	0.44875835	NA	239	28	4h_ctrlLPS_ctrlnoLPS	4h_ctrlnoLPS_pvalue	Inflammasome pathway
147	0	0.447	60	7	4h_ctrlLPS_ctrlnoLPS	4h_ctrlnoLPS_pvalue	Inhibition of ARE-Mediated mRNA Degradation Pathway
148	0.297199677	NA	132	28	4h_ctrlLPS_ctrlnoLPS	4h_ctrlnoLPS_pvalue	Inosine-5'-phosphate Biosynthesis II
149	1.015018551	0.471	152	23	4h_ctrlLPS_ctrlnoLPS	4h_ctrlnoLPS_pvalue	Insulin Secretion Signaling Pathway
150	0.562522075	2.138	67	16	4h_ctrlLPS_ctrlnoLPS	4h_ctrlnoLPS_pvalue	Integrin Signaling
151	1.103740724	2.449	52	8	4h_ctrlLPS_ctrlnoLPS	4h_ctrlnoLPS_pvalue	Interferon Signaling
152	0.460148979	NA	156	28	4h_ctrlLPS_ctrlnoLPS	4h_ctrlnoLPS_pvalue	Iron homeostasis signaling pathway
153	2.589288377	1.342	96	25	4h_ctrlLPS_ctrlnoLPS	4h_ctrlnoLPS_pvalue	Isoleucine Degradation I
154	0.004379113	1	275	26	4h_ctrlLPS_ctrlnoLPS	4h_ctrlnoLPS_pvalue	JAK/Stat Signaling
155	1.535816439	NA	87	28	4h_ctrlLPS_ctrlnoLPS	4h_ctrlnoLPS_pvalue	Ketogenesis
156	2.038776609	NA	193	28	4h_ctrlLPS_ctrlnoLPS	4h_ctrlnoLPS_pvalue	Ketolysis
157	0.266147711	NA	48	28	4h_ctrlLPS_ctrlnoLPS	4h_ctrlnoLPS_pvalue	L-cysteine Degradation I
158	0	NA	172	28	4h_ctrlLPS_ctrlnoLPS	4h_ctrlnoLPS_pvalue	Leucine Degradation I
159	0.475411296	2.887	166	16	4h_ctrlLPS_ctrlnoLPS	4h_ctrlnoLPS_pvalue	Leukocyte Extravasation Signaling
160	1.210244826	NA	106	28	4h_ctrlLPS_ctrlnoLPS	4h_ctrlnoLPS_pvalue	Lipid Antigen Presentation by CD1
161	0.004379113	NA	248	20	4h_ctrlLPS_ctrlnoLPS	4h_ctrlnoLPS_pvalue	LPS/IL-1 Mediated Inhibition of RXR Function
162	0.222750417	-1	93	18	4h_ctrlLPS_ctrlnoLPS	4h_ctrlnoLPS_pvalue	LXR/RXR Activation
163	0	NA	264	23	4h_ctrlLPS_ctrlnoLPS	4h_ctrlnoLPS_pvalue	Macropinocytosis Signaling
164	0.297199677	NA	174	28	4h_ctrlLPS_ctrlnoLPS	4h_ctrlnoLPS_pvalue	Mechanisms of Viral Exit from Host Cells
165	0	NA	170	27	4h_ctrlLPS_ctrlnoLPS	4h_ctrlnoLPS_pvalue	Melatonin Signaling
166	0.015200721	NA	200	28	4h_ctrlLPS_ctrlnoLPS	4h_ctrlnoLPS_pvalue	Methylglyoxal Degradation III
167	1.341262943	NA	216	28	4h_ctrlLPS_ctrlnoLPS	4h_ctrlnoLPS_pvalue	Mevalonate Pathway I
168	0	NA	220	28	4h_ctrlLPS_ctrlnoLPS	4h_ctrlnoLPS_pvalue	MIF-mediated Glucocorticoid Regulation
169	0.002973843	NA	203	28	4h_ctrlLPS_ctrlnoLPS	4h_ctrlnoLPS_pvalue	Mismatch Repair in Eukaryotes
170	9.305985994	NA	169	28	4h_ctrlLPS_ctrlnoLPS	4h_ctrlnoLPS_pvalue	Mitochondrial Dysfunction
171	0	NA	161	28	4h_ctrlLPS_ctrlnoLPS	4h_ctrlnoLPS_pvalue	Mitochondrial L-carnitine Shuttle Pathway
172	0.266147711	NA	103	28	4h_ctrlLPS_ctrlnoLPS	4h_ctrlnoLPS_pvalue	Mitotic Roles of Polo-Like Kinase
173	1.359146672	1.342	55	26	4h_ctrlLPS_ctrlnoLPS	4h_ctrlnoLPS_pvalue	mTOR Signaling
174	0.218238428	NA	80	28	4h_ctrlLPS_ctrlnoLPS	4h_ctrlnoLPS_pvalue	Myo-inositol Biosynthesis
175	0	-0.707	74	12	4h_ctrlLPS_ctrlnoLPS	4h_ctrlnoLPS_pvalue	Natural Killer Cell Signaling
176	0.760695532	0.832	86	25	4h_ctrlLPS_ctrlnoLPS	4h_ctrlnoLPS_pvalue	Necroptosis Signaling Pathway
177	0.760695532	0.816	142	20	4h_ctrlLPS_ctrlnoLPS	4h_ctrlnoLPS_pvalue	NER Pathway
178	0	NA	217	28	4h_ctrlLPS_ctrlnoLPS	4h_ctrlnoLPS_pvalue	Netrin Signaling
179	0	NA	65	23	4h_ctrlLPS_ctrlnoLPS	4h_ctrlnoLPS_pvalue	Neuregulin Signaling
180	0	NA	215	28	4h_ctrlLPS_ctrlnoLPS	4h_ctrlnoLPS_pvalue	nNOS Signaling in Neurons
181	1.35308633	0.378	6	12	4h_ctrlLPS_ctrlnoLPS	4h_ctrlnoLPS_pvalue	NRF2-mediated Oxidative Stress Response
182	0.095300639	NA	288	26	4h_ctrlLPS_ctrlnoLPS	4h_ctrlnoLPS_pvalue	Oncostatin M Signaling
183	0.050457133	-2.309	88	4	4h_ctrlLPS_ctrlnoLPS	4h_ctrlnoLPS_pvalue	Opioid Signaling Pathway
184	0.015200721	NA	112	28	4h_ctrlLPS_ctrlnoLPS	4h_ctrlnoLPS_pvalue	Oxidative Ethanol Degradation III
185	6.081161787	4.583	13	1	4h_ctrlLPS_ctrlnoLPS	4h_ctrlnoLPS_pvalue	Oxidative Phosphorylation
186	1.082689129	NA	179	28	4h_ctrlLPS_ctrlnoLPS	4h_ctrlnoLPS_pvalue	Oxidized GTP and dGTP Detoxification
187	0	NA	277	27	4h_ctrlLPS_ctrlnoLPS	4h_ctrlnoLPS_pvalue	P2Y Purigenic Receptor Signaling Pathway
188	0	NA	51	23	4h_ctrlLPS_ctrlnoLPS	4h_ctrlnoLPS_pvalue	p70S6K Signaling
189	0	2	14	14	4h_ctrlLPS_ctrlnoLPS	4h_ctrlnoLPS_pvalue	PAK Signaling
190	0.315278119	1.89	9	13	4h_ctrlLPS_ctrlnoLPS	4h_ctrlnoLPS_pvalue	Paxillin Signaling
191	0.405308102	NA	241	20	4h_ctrlLPS_ctrlnoLPS	4h_ctrlnoLPS_pvalue	Pentose Phosphate Pathway
192	0.178469356	NA	194	28	4h_ctrlLPS_ctrlnoLPS	4h_ctrlnoLPS_pvalue	Pentose Phosphate Pathway (Non-oxidative Branch)
193	0.266147711	NA	205	28	4h_ctrlLPS_ctrlnoLPS	4h_ctrlnoLPS_pvalue	Pentose Phosphate Pathway (Oxidative Branch)
194	0	NA	256	27	4h_ctrlLPS_ctrlnoLPS	4h_ctrlnoLPS_pvalue	PFKFB4 Signaling Pathway
195	0.045060106	NA	168	28	4h_ctrlLPS_ctrlnoLPS	4h_ctrlnoLPS_pvalue	Phagosome Formation
196	4.690748722	NA	189	28	4h_ctrlLPS_ctrlnoLPS	4h_ctrlnoLPS_pvalue	Phagosome Maturation
197	0.802731687	NA	100	28	4h_ctrlLPS_ctrlnoLPS	4h_ctrlnoLPS_pvalue	Phenylalanine Degradation IV (Mammalian, via Side Chain)
198	0	0.378	292	27	4h_ctrlLPS_ctrlnoLPS	4h_ctrlnoLPS_pvalue	Phospholipase C Signaling
199	0	0	249	23	4h_ctrlLPS_ctrlnoLPS	4h_ctrlnoLPS_pvalue	PI3K Signaling in B Lymphocytes
200	0	NA	61	6	4h_ctrlLPS_ctrlnoLPS	4h_ctrlnoLPS_pvalue	PI3K/AKT Signaling
201	0	NA	181	23	4h_ctrlLPS_ctrlnoLPS	4h_ctrlnoLPS_pvalue	PKC? Signaling in T Lymphocytes
202	0	-2	135	17	4h_ctrlLPS_ctrlnoLPS	4h_ctrlnoLPS_pvalue	PPAR Signaling
203	0.043681167	-1	289	18	4h_ctrlLPS_ctrlnoLPS	4h_ctrlnoLPS_pvalue	PPAR?/RXR? Activation
204	0.802731687	NA	122	28	4h_ctrlLPS_ctrlnoLPS	4h_ctrlnoLPS_pvalue	Pregnenolone Biosynthesis
205	0.782355382	0.832	261	28	4h_ctrlLPS_ctrlnoLPS	4h_ctrlnoLPS_pvalue	Production of Nitric Oxide and Reactive Oxygen Species in Macrophages
206	0	NA	46	26	4h_ctrlLPS_ctrlnoLPS	4h_ctrlnoLPS_pvalue	Prolactin Signaling
207	0	NA	197	28	4h_ctrlLPS_ctrlnoLPS	4h_ctrlnoLPS_pvalue	Prostate Cancer Signaling
208	0	-1.155	62	6	4h_ctrlLPS_ctrlnoLPS	4h_ctrlnoLPS_pvalue	Protein Kinase A Signaling
209	5.778836278	NA	138	28	4h_ctrlLPS_ctrlnoLPS	4h_ctrlnoLPS_pvalue	Protein Ubiquitination Pathway
210	0.071949477	0	25	10	4h_ctrlLPS_ctrlnoLPS	4h_ctrlnoLPS_pvalue	PTEN Signaling
211	0.045060106	NA	236	29	4h_ctrlLPS_ctrlnoLPS	4h_ctrlnoLPS_pvalue	Purine Nucleotides De Novo Biosynthesis II
212	0.673759087	NA	141	28	4h_ctrlLPS_ctrlnoLPS	4h_ctrlnoLPS_pvalue	Purine Ribonucleosides Degradation to Ribose-1-phosphate
213	0.157111893	NA	223	28	4h_ctrlLPS_ctrlnoLPS	4h_ctrlnoLPS_pvalue	Pyrimidine Deoxyribonucleotides De Novo Biosynthesis I
214	0.096721728	NA	257	29	4h_ctrlLPS_ctrlnoLPS	4h_ctrlnoLPS_pvalue	Pyrimidine Ribonucleotides De Novo Biosynthesis
215	0.266147711	NA	127	28	4h_ctrlLPS_ctrlnoLPS	4h_ctrlnoLPS_pvalue	Pyruvate Fermentation to Lactate
216	0.412862823	1.667	49	14	4h_ctrlLPS_ctrlnoLPS	4h_ctrlnoLPS_pvalue	Rac Signaling
217	0.266147711	NA	224	25	4h_ctrlLPS_ctrlnoLPS	4h_ctrlnoLPS_pvalue	RAN Signaling
218	0	NA	231	28	4h_ctrlLPS_ctrlnoLPS	4h_ctrlnoLPS_pvalue	RANK Signaling in Osteoclasts
219	0.266147711	NA	151	28	4h_ctrlLPS_ctrlnoLPS	4h_ctrlnoLPS_pvalue	Rapoport-Luebering Glycolytic Shunt
220	0	1	77	13	4h_ctrlLPS_ctrlnoLPS	4h_ctrlnoLPS_pvalue	Reelin Signaling in Neurons
221	1.286571079	2.333	32	16	4h_ctrlLPS_ctrlnoLPS	4h_ctrlnoLPS_pvalue	Regulation of Actin-based Motility by Rho
222	0.095300639	NA	34	23	4h_ctrlLPS_ctrlnoLPS	4h_ctrlnoLPS_pvalue	Regulation of Cellular Mechanics by Calpain Protease
223	2.918888595	NA	268	23	4h_ctrlLPS_ctrlnoLPS	4h_ctrlnoLPS_pvalue	Regulation of eIF4 and p70S6K Signaling
224	0	NA	105	28	4h_ctrlLPS_ctrlnoLPS	4h_ctrlnoLPS_pvalue	Regulation of IL-2 Expression in Activated and Anergic T Lymphocytes
225	1.000297677	1.342	263	26	4h_ctrlLPS_ctrlnoLPS	4h_ctrlnoLPS_pvalue	Remodeling of Epithelial Adherens Junctions
226	0.017721058	NA	97	12	4h_ctrlLPS_ctrlnoLPS	4h_ctrlnoLPS_pvalue	Renal Cell Carcinoma Signaling
227	0	NA	70	14	4h_ctrlLPS_ctrlnoLPS	4h_ctrlnoLPS_pvalue	Renin-Angiotensin Signaling
228	0.29369865	2.121	11	13	4h_ctrlLPS_ctrlnoLPS	4h_ctrlnoLPS_pvalue	RhoA Signaling
229	0.649122542	-2.111	134	22	4h_ctrlLPS_ctrlnoLPS	4h_ctrlnoLPS_pvalue	RhoGDI Signaling
230	0.802731687	NA	199	28	4h_ctrlLPS_ctrlnoLPS	4h_ctrlnoLPS_pvalue	Role of IL-17A in Psoriasis
231	0	NA	225	29	4h_ctrlLPS_ctrlnoLPS	4h_ctrlnoLPS_pvalue	Role of IL-17F in Allergic Inflammatory Airway Diseases
232	0.358912475	NA	124	28	4h_ctrlLPS_ctrlnoLPS	4h_ctrlnoLPS_pvalue	Role of JAK1, JAK2 and TYK2 in Interferon Signaling
233	0	0	137	12	4h_ctrlLPS_ctrlnoLPS	4h_ctrlnoLPS_pvalue	Role of NFAT in Cardiac Hypertrophy
234	0	NA	265	27	4h_ctrlLPS_ctrlnoLPS	4h_ctrlnoLPS_pvalue	Role of NFAT in Regulation of the Immune Response
235	0	NA	258	27	4h_ctrlLPS_ctrlnoLPS	4h_ctrlnoLPS_pvalue	Role of PI3K/AKT Signaling in the Pathogenesis of Influenza
236	1.034739995	2.111	22	3	4h_ctrlLPS_ctrlnoLPS	4h_ctrlnoLPS_pvalue	Role of PKR in Interferon Induction and Antiviral Response
237	0.011821088	NA	230	29	4h_ctrlLPS_ctrlnoLPS	4h_ctrlnoLPS_pvalue	Role of RIG1-like Receptors in Antiviral Innate Immunity
238	0	NA	158	28	4h_ctrlLPS_ctrlnoLPS	4h_ctrlnoLPS_pvalue	Role of Tissue Factor in Cancer
239	0	NA	121	28	4h_ctrlLPS_ctrlnoLPS	4h_ctrlnoLPS_pvalue	S-adenosyl-L-methionine Biosynthesis
240	0	NA	123	28	4h_ctrlLPS_ctrlnoLPS	4h_ctrlnoLPS_pvalue	Selenocysteine Biosynthesis II (Archaea and Eukaryotes)
241	0	1.342	7	10	4h_ctrlLPS_ctrlnoLPS	4h_ctrlnoLPS_pvalue	Semaphorin Neuronal Repulsive Signaling Pathway
242	0.20957041	NA	131	28	4h_ctrlLPS_ctrlnoLPS	4h_ctrlnoLPS_pvalue	Semaphorin Signaling in Neurons
243	0	-1.414	120	18	4h_ctrlLPS_ctrlnoLPS	4h_ctrlnoLPS_pvalue	Senescence Pathway
244	0.878486736	NA	94	28	4h_ctrlLPS_ctrlnoLPS	4h_ctrlnoLPS_pvalue	Serine Biosynthesis
245	0	NA	125	28	4h_ctrlLPS_ctrlnoLPS	4h_ctrlnoLPS_pvalue	Sertoli Cell-Sertoli Cell Junction Signaling
246	0.838187793	1.5	119	13	4h_ctrlLPS_ctrlnoLPS	4h_ctrlnoLPS_pvalue	Signaling by Rho Family GTPases
247	8.208549266	-1.826	36	4	4h_ctrlLPS_ctrlnoLPS	4h_ctrlnoLPS_pvalue	Sirtuin Signaling Pathway
248	0	NA	259	28	4h_ctrlLPS_ctrlnoLPS	4h_ctrlnoLPS_pvalue	Sphingosine-1-phosphate Signaling
249	2.038776609	-2.333	18	2	4h_ctrlLPS_ctrlnoLPS	4h_ctrlnoLPS_pvalue	Spliceosomal Cycle
250	0	NA	232	28	4h_ctrlLPS_ctrlnoLPS	4h_ctrlnoLPS_pvalue	Stearate Biosynthesis I (Animals)
251	1.158147436	NA	244	29	4h_ctrlLPS_ctrlnoLPS	4h_ctrlnoLPS_pvalue	Sucrose Degradation V (Mammalian)
252	0.549518193	NA	187	28	4h_ctrlLPS_ctrlnoLPS	4h_ctrlnoLPS_pvalue	Sulfate Activation for Sulfonation
253	1.35308633	0.378	296	20	4h_ctrlLPS_ctrlnoLPS	4h_ctrlnoLPS_pvalue	Sumoylation Pathway
254	2.038776609	1	245	26	4h_ctrlLPS_ctrlnoLPS	4h_ctrlnoLPS_pvalue	Superoxide Radicals Degradation
255	2.038776609	0.816	246	25	4h_ctrlLPS_ctrlnoLPS	4h_ctrlnoLPS_pvalue	Superpathway of Cholesterol Biosynthesis
256	1.535816439	0	234	28	4h_ctrlLPS_ctrlnoLPS	4h_ctrlnoLPS_pvalue	Superpathway of Citrulline Metabolism
257	1.614163436	2	238	19	4h_ctrlLPS_ctrlnoLPS	4h_ctrlnoLPS_pvalue	Superpathway of Geranylgeranyldiphosphate Biosynthesis I (via Mevalonate)
258	0.178469356	0.905	3	11	4h_ctrlLPS_ctrlnoLPS	4h_ctrlnoLPS_pvalue	Superpathway of Inositol Phosphate Compounds
259	0.475411296	0	27	15	4h_ctrlLPS_ctrlnoLPS	4h_ctrlnoLPS_pvalue	Superpathway of Methionine Degradation
260	0.673759087	NA	235	23	4h_ctrlLPS_ctrlnoLPS	4h_ctrlnoLPS_pvalue	Superpathway of Serine and Glycine Biosynthesis I
261	0	NA	4	7	4h_ctrlLPS_ctrlnoLPS	4h_ctrlnoLPS_pvalue	Synaptic Long Term Potentiation
262	0.008046682	0	12	12	4h_ctrlLPS_ctrlnoLPS	4h_ctrlnoLPS_pvalue	Synaptogenesis Signaling Pathway
263	0	2.53	54	19	4h_ctrlLPS_ctrlnoLPS	4h_ctrlnoLPS_pvalue	Systemic Lupus Erythematosus In B Cell Signaling Pathway
264	0	0.707	276	26	4h_ctrlLPS_ctrlnoLPS	4h_ctrlnoLPS_pvalue	Systemic Lupus Erythematosus In T Cell Signaling Pathway
265	0.676946951	NA	126	28	4h_ctrlLPS_ctrlnoLPS	4h_ctrlnoLPS_pvalue	Systemic Lupus Erythematosus Signaling
266	0	NA	47	28	4h_ctrlLPS_ctrlnoLPS	4h_ctrlnoLPS_pvalue	T Cell Receptor Signaling
267	2.753015117	1.134	28	14	4h_ctrlLPS_ctrlnoLPS	4h_ctrlnoLPS_pvalue	TCA Cycle II (Eukaryotic)
268	0.238484574	2.121	8	11	4h_ctrlLPS_ctrlnoLPS	4h_ctrlnoLPS_pvalue	Tec Kinase Signaling
269	0	NA	285	27	4h_ctrlLPS_ctrlnoLPS	4h_ctrlnoLPS_pvalue	Telomerase Signaling
270	0.266147711	NA	196	28	4h_ctrlLPS_ctrlnoLPS	4h_ctrlnoLPS_pvalue	Telomere Extension by Telomerase
271	0.218238428	NA	175	28	4h_ctrlLPS_ctrlnoLPS	4h_ctrlnoLPS_pvalue	Tetrahydrofolate Salvage from 5,10-methenyltetrahydrofolate
272	0	0	82	12	4h_ctrlLPS_ctrlnoLPS	4h_ctrlnoLPS_pvalue	Thrombin Signaling
273	0	NA	41	26	4h_ctrlLPS_ctrlnoLPS	4h_ctrlnoLPS_pvalue	Thrombopoietin Signaling
274	0.549518193	NA	148	28	4h_ctrlLPS_ctrlnoLPS	4h_ctrlnoLPS_pvalue	Thyroid Hormone Biosynthesis
275	0.01067146	NA	118	28	4h_ctrlLPS_ctrlnoLPS	4h_ctrlnoLPS_pvalue	Tight Junction Signaling
276	0.218238428	2.236	5	11	4h_ctrlLPS_ctrlnoLPS	4h_ctrlnoLPS_pvalue	TREM1 Signaling
277	9.913106178	-3.638	68	4	4h_ctrlLPS_ctrlnoLPS	4h_ctrlnoLPS_pvalue	tRNA Charging
278	1.210244826	1	284	29	4h_ctrlLPS_ctrlnoLPS	4h_ctrlnoLPS_pvalue	Tryptophan Degradation III (Eukaryotic)
279	0	NA	90	28	4h_ctrlLPS_ctrlnoLPS	4h_ctrlnoLPS_pvalue	Tryptophan Degradation to 2-amino-3-carboxymuconate Semialdehyde
280	0.649122542	NA	136	28	4h_ctrlLPS_ctrlnoLPS	4h_ctrlnoLPS_pvalue	Ubiquinol-10 Biosynthesis (Eukaryotic)
281	0.178469356	NA	79	28	4h_ctrlLPS_ctrlnoLPS	4h_ctrlnoLPS_pvalue	UDP-N-acetyl-D-glucosamine Biosynthesis II
282	0.804997799	-0.378	33	6	4h_ctrlLPS_ctrlnoLPS	4h_ctrlnoLPS_pvalue	Unfolded protein response
283	0.767779739	NA	98	28	4h_ctrlLPS_ctrlnoLPS	4h_ctrlnoLPS_pvalue	Urea Cycle
284	0	NA	91	28	4h_ctrlLPS_ctrlnoLPS	4h_ctrlnoLPS_pvalue	Uridine-5'-phosphate Biosynthesis
285	0	NA	281	23	4h_ctrlLPS_ctrlnoLPS	4h_ctrlnoLPS_pvalue	UVA-Induced MAPK Signaling
286	0.475411296	NA	242	25	4h_ctrlLPS_ctrlnoLPS	4h_ctrlnoLPS_pvalue	Valine Degradation I
287	0.266147711	1	63	12	4h_ctrlLPS_ctrlnoLPS	4h_ctrlnoLPS_pvalue	VEGF Signaling
288	1.305826746	NA	157	28	4h_ctrlLPS_ctrlnoLPS	4h_ctrlnoLPS_pvalue	Virus Entry via Endocytic Pathways
289	0.178469356	NA	146	28	4h_ctrlLPS_ctrlnoLPS	4h_ctrlnoLPS_pvalue	Vitamin-C Transport
290	0	NA	240	28	4h_ctrlLPS_ctrlnoLPS	4h_ctrlnoLPS_pvalue	Wnt/Ca+ pathway
291	0.549518193	NA	167	28	4h_ctrlLPS_ctrlnoLPS	4h_ctrlnoLPS_pvalue	Xanthine and Xanthosine Salvage
292	0.513699173	-1.134	50	22	4h_ctrlLPS_ctrlnoLPS	4h_ctrlnoLPS_pvalue	Xenobiotic Metabolism AHR Signaling Pathway
293	0	-1.134	159	18	4h_ctrlLPS_ctrlnoLPS	4h_ctrlnoLPS_pvalue	Xenobiotic Metabolism CAR Signaling Pathway
294	0.30281324	0.302	78	11	4h_ctrlLPS_ctrlnoLPS	4h_ctrlnoLPS_pvalue	Xenobiotic Metabolism PXR Signaling Pathway
295	0.149963005	NA	37	28	4h_ctrlLPS_ctrlnoLPS	4h_ctrlnoLPS_pvalue	Xenobiotic Metabolism Signaling
296	0.178469356	NA	198	28	4h_ctrlLPS_ctrlnoLPS	4h_ctrlnoLPS_pvalue	Zymosterol Biosynthesis
297	0.494759547	-0.707	35	12	4h_DINCH_10nM_ctrlnoLPS	4h_ctrlnoLPS_pvalue	?-Adrenergic Signaling
298	0.856029549	NA	164	28	4h_DINCH_10nM_ctrlnoLPS	4h_ctrlnoLPS_pvalue	?-glutamyl Cycle
299	0.992539939	1	221	29	4h_DINCH_10nM_ctrlnoLPS	4h_ctrlnoLPS_pvalue	?-linolenate Biosynthesis II (Animals)
300	0.834647913	-1.134	26	7	4h_DINCH_10nM_ctrlnoLPS	4h_ctrlnoLPS_pvalue	14-3-3-mediated Signaling
301	1.757629341	NA	211	28	4h_DINCH_10nM_ctrlnoLPS	4h_ctrlnoLPS_pvalue	2-ketoglutarate Dehydrogenase Complex
302	0.185098948	0.632	57	11	4h_DINCH_10nM_ctrlnoLPS	4h_ctrlnoLPS_pvalue	3-phosphoinositide Biosynthesis
303	0.24757246	NA	219	28	4h_DINCH_10nM_ctrlnoLPS	4h_ctrlnoLPS_pvalue	4-1BB Signaling in T Lymphocytes
304	0.62693407	NA	110	28	4h_DINCH_10nM_ctrlnoLPS	4h_ctrlnoLPS_pvalue	Acetyl-CoA Biosynthesis I (Pyruvate Dehydrogenase Complex)
305	0	NA	108	28	4h_DINCH_10nM_ctrlnoLPS	4h_ctrlnoLPS_pvalue	Acetyl-CoA Biosynthesis III (from Citrate)
306	0.675066384	0.258	58	16	4h_DINCH_10nM_ctrlnoLPS	4h_ctrlnoLPS_pvalue	Actin Cytoskeleton Signaling
307	0.216951082	-1	81	13	4h_DINCH_10nM_ctrlnoLPS	4h_ctrlnoLPS_pvalue	Actin Nucleation by ARP-WASP Complex
308	0.295939166	1.342	21	11	4h_DINCH_10nM_ctrlnoLPS	4h_ctrlnoLPS_pvalue	Activation of IRF by Cytosolic Pattern Recognition Receptors
309	0.289864283	0	267	23	4h_DINCH_10nM_ctrlnoLPS	4h_ctrlnoLPS_pvalue	Acute Myeloid Leukemia Signaling
310	0.38054263	NA	180	28	4h_DINCH_10nM_ctrlnoLPS	4h_ctrlnoLPS_pvalue	Adenine and Adenosine Salvage I
311	0.62693407	NA	117	28	4h_DINCH_10nM_ctrlnoLPS	4h_ctrlnoLPS_pvalue	Adenine and Adenosine Salvage III
312	0	NA	165	28	4h_DINCH_10nM_ctrlnoLPS	4h_ctrlnoLPS_pvalue	Adenine and Adenosine Salvage VI
313	0.376026298	NA	56	28	4h_DINCH_10nM_ctrlnoLPS	4h_ctrlnoLPS_pvalue	Agranulocyte Adhesion and Diapedesis
314	0.382115817	-0.378	84	13	4h_DINCH_10nM_ctrlnoLPS	4h_ctrlnoLPS_pvalue	Agrin Interactions at Neuromuscular Junction
315	0.523781646	0	233	28	4h_DINCH_10nM_ctrlnoLPS	4h_ctrlnoLPS_pvalue	Aldosterone Signaling in Epithelial Cells
316	0	NA	64	24	4h_DINCH_10nM_ctrlnoLPS	4h_ctrlnoLPS_pvalue	Amyloid Processing
317	0.20409063	-0.447	286	20	4h_DINCH_10nM_ctrlnoLPS	4h_ctrlnoLPS_pvalue	Angiopoietin Signaling
318	0.31638551	NA	72	28	4h_DINCH_10nM_ctrlnoLPS	4h_ctrlnoLPS_pvalue	Antigen Presentation Pathway
319	0.41282104	-0.816	270	27	4h_DINCH_10nM_ctrlnoLPS	4h_ctrlnoLPS_pvalue	Antioxidant Action of Vitamin C
320	0.192655275	-0.447	279	27	4h_DINCH_10nM_ctrlnoLPS	4h_ctrlnoLPS_pvalue	Antiproliferative Role of Somatostatin Receptor 2
321	0.727468863	0.333	280	26	4h_DINCH_10nM_ctrlnoLPS	4h_ctrlnoLPS_pvalue	Apelin Adipocyte Signaling Pathway
322	0.38054263	-0.707	278	20	4h_DINCH_10nM_ctrlnoLPS	4h_ctrlnoLPS_pvalue	Apelin Cardiomyocyte Signaling Pathway
323	0.38054263	-0.632	287	27	4h_DINCH_10nM_ctrlnoLPS	4h_ctrlnoLPS_pvalue	Apelin Endothelial Signaling Pathway
324	0.62693407	0	293	28	4h_DINCH_10nM_ctrlnoLPS	4h_ctrlnoLPS_pvalue	Apoptosis Signaling
325	0.267877929	NA	85	28	4h_DINCH_10nM_ctrlnoLPS	4h_ctrlnoLPS_pvalue	Arginine Biosynthesis IV
326	0.295939166	NA	101	28	4h_DINCH_10nM_ctrlnoLPS	4h_ctrlnoLPS_pvalue	Arsenate Detoxification I (Glutaredoxin)
327	0.797009653	0	253	28	4h_DINCH_10nM_ctrlnoLPS	4h_ctrlnoLPS_pvalue	Aryl Hydrocarbon Receptor Signaling
328	0.545531366	NA	207	28	4h_DINCH_10nM_ctrlnoLPS	4h_ctrlnoLPS_pvalue	Asparagine Biosynthesis I
329	0.31638551	NA	195	28	4h_DINCH_10nM_ctrlnoLPS	4h_ctrlnoLPS_pvalue	Aspartate Biosynthesis
330	0.234299744	NA	128	28	4h_DINCH_10nM_ctrlnoLPS	4h_ctrlnoLPS_pvalue	Aspartate Degradation II
331	0.439795917	NA	149	28	4h_DINCH_10nM_ctrlnoLPS	4h_ctrlnoLPS_pvalue	Atherosclerosis Signaling
332	0.152494858	-2.236	19	18	4h_DINCH_10nM_ctrlnoLPS	4h_ctrlnoLPS_pvalue	ATM Signaling
333	0.94082625	NA	143	28	4h_DINCH_10nM_ctrlnoLPS	4h_ctrlnoLPS_pvalue	Autophagy
334	0.30232534	NA	42	28	4h_DINCH_10nM_ctrlnoLPS	4h_ctrlnoLPS_pvalue	Axonal Guidance Signaling
335	0.295939166	0.577	177	12	4h_DINCH_10nM_ctrlnoLPS	4h_ctrlnoLPS_pvalue	B Cell Receptor Signaling
336	1.030300949	-1.134	76	4	4h_DINCH_10nM_ctrlnoLPS	4h_ctrlnoLPS_pvalue	BAG2 Signaling Pathway
337	0.131597195	NA	206	28	4h_DINCH_10nM_ctrlnoLPS	4h_ctrlnoLPS_pvalue	BER pathway
338	0	NA	113	28	4h_DINCH_10nM_ctrlnoLPS	4h_ctrlnoLPS_pvalue	Bile Acid Biosynthesis, Neutral Pathway
339	0.781308839	NA	144	28	4h_DINCH_10nM_ctrlnoLPS	4h_ctrlnoLPS_pvalue	Branched-chain ?-keto acid Dehydrogenase Complex
340	0.267877929	-0.447	243	28	4h_DINCH_10nM_ctrlnoLPS	4h_ctrlnoLPS_pvalue	Calcium-induced T Lymphocyte Apoptosis
341	0.216951082	0.277	290	25	4h_DINCH_10nM_ctrlnoLPS	4h_ctrlnoLPS_pvalue	Cardiac Hypertrophy Signaling
342	3.064474575	NA	204	28	4h_DINCH_10nM_ctrlnoLPS	4h_ctrlnoLPS_pvalue	Caveolar-mediated Endocytosis Signaling
343	0.295939166	0	89	12	4h_DINCH_10nM_ctrlnoLPS	4h_ctrlnoLPS_pvalue	CCR3 Signaling in Eosinophils
344	0.20409063	0	260	27	4h_DINCH_10nM_ctrlnoLPS	4h_ctrlnoLPS_pvalue	CD27 Signaling in Lymphocytes
345	0.295939166	0	182	27	4h_DINCH_10nM_ctrlnoLPS	4h_ctrlnoLPS_pvalue	CD28 Signaling in T Helper Cells
346	0.234027567	1	251	29	4h_DINCH_10nM_ctrlnoLPS	4h_ctrlnoLPS_pvalue	CD40 Signaling
347	0.327769367	-1.134	73	13	4h_DINCH_10nM_ctrlnoLPS	4h_ctrlnoLPS_pvalue	Cdc42 Signaling
348	0.130456262	-0.447	59	12	4h_DINCH_10nM_ctrlnoLPS	4h_ctrlnoLPS_pvalue	CDK5 Signaling
349	0.439795917	1.633	10	21	4h_DINCH_10nM_ctrlnoLPS	4h_ctrlnoLPS_pvalue	Cell Cycle Control of Chromosomal Replication
350	0.327769367	NA	218	28	4h_DINCH_10nM_ctrlnoLPS	4h_ctrlnoLPS_pvalue	Cell Cycle: G2/M DNA Damage Checkpoint Regulation
351	0.20409063	0	291	27	4h_DINCH_10nM_ctrlnoLPS	4h_ctrlnoLPS_pvalue	Ceramide Signaling
352	0.727468863	-0.333	271	20	4h_DINCH_10nM_ctrlnoLPS	4h_ctrlnoLPS_pvalue	Chemokine Signaling
353	0.397968004	0.333	163	26	4h_DINCH_10nM_ctrlnoLPS	4h_ctrlnoLPS_pvalue	Cholecystokinin/Gastrin-mediated Signaling
354	0.313580195	NA	115	28	4h_DINCH_10nM_ctrlnoLPS	4h_ctrlnoLPS_pvalue	Cholesterol Biosynthesis I
355	0.313580195	NA	176	28	4h_DINCH_10nM_ctrlnoLPS	4h_ctrlnoLPS_pvalue	Cholesterol Biosynthesis II (via 24,25-dihydrolanosterol)
356	0.313580195	NA	95	28	4h_DINCH_10nM_ctrlnoLPS	4h_ctrlnoLPS_pvalue	Cholesterol Biosynthesis III (via Desmosterol)
357	0.19660654	NA	145	28	4h_DINCH_10nM_ctrlnoLPS	4h_ctrlnoLPS_pvalue	Chronic Myeloid Leukemia Signaling
358	0.267877929	NA	140	28	4h_DINCH_10nM_ctrlnoLPS	4h_ctrlnoLPS_pvalue	Citrulline-Nitric Oxide Cycle
359	0.701081596	NA	130	28	4h_DINCH_10nM_ctrlnoLPS	4h_ctrlnoLPS_pvalue	Citrulline Biosynthesis
360	1.687049129	NA	190	28	4h_DINCH_10nM_ctrlnoLPS	4h_ctrlnoLPS_pvalue	Clathrin-mediated Endocytosis Signaling
361	0.701081596	-1.604	83	17	4h_DINCH_10nM_ctrlnoLPS	4h_ctrlnoLPS_pvalue	Coronavirus Pathogenesis Pathway
362	0.295939166	NA	173	28	4h_DINCH_10nM_ctrlnoLPS	4h_ctrlnoLPS_pvalue	Creatine-phosphate Biosynthesis
363	0	-1.667	75	7	4h_DINCH_10nM_ctrlnoLPS	4h_ctrlnoLPS_pvalue	CREB Signaling in Neurons
364	0.295939166	NA	114	28	4h_DINCH_10nM_ctrlnoLPS	4h_ctrlnoLPS_pvalue	CTLA4 Signaling in Cytotoxic T Lymphocytes
365	0.621086299	-0.832	40	27	4h_DINCH_10nM_ctrlnoLPS	4h_ctrlnoLPS_pvalue	CXCR4 Signaling
366	0.301084175	0.905	39	11	4h_DINCH_10nM_ctrlnoLPS	4h_ctrlnoLPS_pvalue	D-myo-inositol-5-phosphate Metabolism
367	0	NA	29	24	4h_DINCH_10nM_ctrlnoLPS	4h_ctrlnoLPS_pvalue	D-myo-inositol (1,4,5)-Trisphosphate Biosynthesis
368	0.295939166	0.632	147	11	4h_DINCH_10nM_ctrlnoLPS	4h_ctrlnoLPS_pvalue	D-myo-inositol (1,4,5,6)-Tetrakisphosphate Biosynthesis
369	0.295939166	0.632	133	11	4h_DINCH_10nM_ctrlnoLPS	4h_ctrlnoLPS_pvalue	D-myo-inositol (3,4,5,6)-tetrakisphosphate Biosynthesis
370	0.537794824	0.333	255	28	4h_DINCH_10nM_ctrlnoLPS	4h_ctrlnoLPS_pvalue	Death Receptor Signaling
371	0.295939166	NA	208	28	4h_DINCH_10nM_ctrlnoLPS	4h_ctrlnoLPS_pvalue	DNA Double-Strand Break Repair by Non-Homologous End Joining
372	0.20409063	NA	226	20	4h_DINCH_10nM_ctrlnoLPS	4h_ctrlnoLPS_pvalue	Dopamine Degradation
373	6.981699298	3.545	20	5	4h_DINCH_10nM_ctrlnoLPS	4h_ctrlnoLPS_pvalue	EIF2 Signaling
374	0.234299744	-2.121	23	20	4h_DINCH_10nM_ctrlnoLPS	4h_ctrlnoLPS_pvalue	Endocannabinoid Neuronal Synapse Pathway
375	0	NA	222	20	4h_DINCH_10nM_ctrlnoLPS	4h_ctrlnoLPS_pvalue	Endoplasmic Reticulum Stress Pathway
376	0.805139443	-1.414	184	20	4h_DINCH_10nM_ctrlnoLPS	4h_ctrlnoLPS_pvalue	Ephrin B Signaling
377	0.31638551	-1.155	1	7	4h_DINCH_10nM_ctrlnoLPS	4h_ctrlnoLPS_pvalue	Ephrin Receptor Signaling
378	0.658431692	NA	192	28	4h_DINCH_10nM_ctrlnoLPS	4h_ctrlnoLPS_pvalue	Epithelial Adherens Junction Signaling
379	0.277636141	0	31	19	4h_DINCH_10nM_ctrlnoLPS	4h_ctrlnoLPS_pvalue	ERK/MAPK Signaling
380	0.327769367	NA	186	28	4h_DINCH_10nM_ctrlnoLPS	4h_ctrlnoLPS_pvalue	Erythropoietin Signaling
381	0.414306703	-0.447	229	28	4h_DINCH_10nM_ctrlnoLPS	4h_ctrlnoLPS_pvalue	Estrogen-Dependent Breast Cancer Signaling
382	0.277636141	NA	295	22	4h_DINCH_10nM_ctrlnoLPS	4h_ctrlnoLPS_pvalue	Estrogen Biosynthesis
383	1.039245788	0.378	273	26	4h_DINCH_10nM_ctrlnoLPS	4h_ctrlnoLPS_pvalue	Estrogen Receptor Signaling
384	0.439795917	NA	227	20	4h_DINCH_10nM_ctrlnoLPS	4h_ctrlnoLPS_pvalue	Ethanol Degradation IV
385	0.481219685	NA	154	28	4h_DINCH_10nM_ctrlnoLPS	4h_ctrlnoLPS_pvalue	FAK Signaling
386	0.4849326	NA	237	26	4h_DINCH_10nM_ctrlnoLPS	4h_ctrlnoLPS_pvalue	FAT10 Signaling Pathway
387	2.465604744	0.707	247	26	4h_DINCH_10nM_ctrlnoLPS	4h_ctrlnoLPS_pvalue	Fatty Acid ?-oxidation I
388	0.786817051	NA	104	28	4h_DINCH_10nM_ctrlnoLPS	4h_ctrlnoLPS_pvalue	Fatty Acid Activation
389	0.63983621	1.265	53	16	4h_DINCH_10nM_ctrlnoLPS	4h_ctrlnoLPS_pvalue	Fc? Receptor-mediated Phagocytosis in Macrophages and Monocytes
390	0	1	102	19	4h_DINCH_10nM_ctrlnoLPS	4h_ctrlnoLPS_pvalue	FLT3 Signaling in Hematopoietic Progenitor Cells
391	0.856029549	-0.832	15	13	4h_DINCH_10nM_ctrlnoLPS	4h_ctrlnoLPS_pvalue	fMLP Signaling in Neutrophils
392	0.701081596	NA	178	28	4h_DINCH_10nM_ctrlnoLPS	4h_ctrlnoLPS_pvalue	Folate Polyglutamylation
393	0	-2.449	71	6	4h_DINCH_10nM_ctrlnoLPS	4h_ctrlnoLPS_pvalue	G Beta Gamma Signaling
394	0.295939166	NA	109	28	4h_DINCH_10nM_ctrlnoLPS	4h_ctrlnoLPS_pvalue	G Protein Signaling Mediated by Tubby
395	0.38054263	-0.302	262	28	4h_DINCH_10nM_ctrlnoLPS	4h_ctrlnoLPS_pvalue	G?q Signaling
396	0.267877929	NA	201	28	4h_DINCH_10nM_ctrlnoLPS	4h_ctrlnoLPS_pvalue	Galactose Degradation I (Leloir Pathway)
397	0.71903925	NA	209	28	4h_DINCH_10nM_ctrlnoLPS	4h_ctrlnoLPS_pvalue	Gap Junction Signaling
398	0	NA	254	23	4h_DINCH_10nM_ctrlnoLPS	4h_ctrlnoLPS_pvalue	GDNF Family Ligand-Receptor Interactions
399	0.856029549	NA	213	28	4h_DINCH_10nM_ctrlnoLPS	4h_ctrlnoLPS_pvalue	GDP-glucose Biosynthesis
400	1.284737307	NA	191	28	4h_DINCH_10nM_ctrlnoLPS	4h_ctrlnoLPS_pvalue	Germ Cell-Sertoli Cell Junction Signaling
401	0.134874977	-0.378	111	23	4h_DINCH_10nM_ctrlnoLPS	4h_ctrlnoLPS_pvalue	Glioblastoma Multiforme Signaling
402	0.123257121	NA	43	26	4h_DINCH_10nM_ctrlnoLPS	4h_ctrlnoLPS_pvalue	Glioma Invasiveness Signaling
403	0.267877929	-0.447	38	12	4h_DINCH_10nM_ctrlnoLPS	4h_ctrlnoLPS_pvalue	Glioma Signaling
404	0.20409063	NA	188	28	4h_DINCH_10nM_ctrlnoLPS	4h_ctrlnoLPS_pvalue	Glucocorticoid Receptor Signaling
405	4.167444115	2.333	2	9	4h_DINCH_10nM_ctrlnoLPS	4h_ctrlnoLPS_pvalue	Gluconeogenesis I
406	0.856029549	NA	214	28	4h_DINCH_10nM_ctrlnoLPS	4h_ctrlnoLPS_pvalue	Glucose and Glucose-1-phosphate Degradation
407	0.31638551	NA	212	28	4h_DINCH_10nM_ctrlnoLPS	4h_ctrlnoLPS_pvalue	Glutamate Degradation II
408	0.545531366	NA	66	28	4h_DINCH_10nM_ctrlnoLPS	4h_ctrlnoLPS_pvalue	Glutamate Removal from Folates
409	0.545531366	NA	185	28	4h_DINCH_10nM_ctrlnoLPS	4h_ctrlnoLPS_pvalue	Glutamine Degradation I
410	0.857357274	NA	266	13	4h_DINCH_10nM_ctrlnoLPS	4h_ctrlnoLPS_pvalue	Glutaryl-CoA Degradation
411	0.382115817	NA	228	20	4h_DINCH_10nM_ctrlnoLPS	4h_ctrlnoLPS_pvalue	Glutathione-mediated Detoxification
412	0.740843899	2	155	11	4h_DINCH_10nM_ctrlnoLPS	4h_ctrlnoLPS_pvalue	Glutathione Redox Reactions I
413	0.781308839	NA	153	28	4h_DINCH_10nM_ctrlnoLPS	4h_ctrlnoLPS_pvalue	Glutathione Redox Reactions II
414	0.234299744	NA	210	28	4h_DINCH_10nM_ctrlnoLPS	4h_ctrlnoLPS_pvalue	Glycine Cleavage Complex
415	0.234299744	NA	171	28	4h_DINCH_10nM_ctrlnoLPS	4h_ctrlnoLPS_pvalue	Glycogen Biosynthesis II (from UDP-D-Glucose)
416	2.600999611	1.342	92	11	4h_DINCH_10nM_ctrlnoLPS	4h_ctrlnoLPS_pvalue	Glycogen Degradation II
417	3.202798234	1.633	45	11	4h_DINCH_10nM_ctrlnoLPS	4h_ctrlnoLPS_pvalue	Glycogen Degradation III
418	8.337494645	3.606	24	3	4h_DINCH_10nM_ctrlnoLPS	4h_ctrlnoLPS_pvalue	Glycolysis I
419	0.397968004	0	16	12	4h_DINCH_10nM_ctrlnoLPS	4h_ctrlnoLPS_pvalue	GM-CSF Signaling
420	0.545531366	-1.069	17	7	4h_DINCH_10nM_ctrlnoLPS	4h_ctrlnoLPS_pvalue	GNRH Signaling
421	0.38054263	0	250	27	4h_DINCH_10nM_ctrlnoLPS	4h_ctrlnoLPS_pvalue	GPCR-Mediated Integration of Enteroendocrine Signaling Exemplified by an L Cell
422	1.617465801	NA	150	28	4h_DINCH_10nM_ctrlnoLPS	4h_ctrlnoLPS_pvalue	Granzyme A Signaling
423	0.277636141	NA	252	22	4h_DINCH_10nM_ctrlnoLPS	4h_ctrlnoLPS_pvalue	Granzyme B Signaling
424	1.238757178	NA	107	28	4h_DINCH_10nM_ctrlnoLPS	4h_ctrlnoLPS_pvalue	Guanine and Guanosine Salvage I
425	0.295939166	NA	129	28	4h_DINCH_10nM_ctrlnoLPS	4h_ctrlnoLPS_pvalue	Heme Biosynthesis from Uroporphyrinogen-III I
426	0.295939166	NA	99	28	4h_DINCH_10nM_ctrlnoLPS	4h_ctrlnoLPS_pvalue	Heme Degradation
427	0.604500456	2.183	30	9	4h_DINCH_10nM_ctrlnoLPS	4h_ctrlnoLPS_pvalue	HIF1? Signaling
428	0.626995119	1.342	44	10	4h_DINCH_10nM_ctrlnoLPS	4h_ctrlnoLPS_pvalue	HIPPO signaling
429	0	0.816	139	26	4h_DINCH_10nM_ctrlnoLPS	4h_ctrlnoLPS_pvalue	HMGB1 Signaling
430	0.327769367	-0.378	294	22	4h_DINCH_10nM_ctrlnoLPS	4h_ctrlnoLPS_pvalue	Huntington's Disease Signaling
431	0.38054263	NA	162	28	4h_DINCH_10nM_ctrlnoLPS	4h_ctrlnoLPS_pvalue	Hypoxia Signaling in the Cardiovascular System
432	0	NA	116	28	4h_DINCH_10nM_ctrlnoLPS	4h_ctrlnoLPS_pvalue	Hypusine Biosynthesis
433	0.18323669	-0.447	283	27	4h_DINCH_10nM_ctrlnoLPS	4h_ctrlnoLPS_pvalue	iCOS-iCOSL Signaling in T Helper Cells
434	0.20409063	0	272	27	4h_DINCH_10nM_ctrlnoLPS	4h_ctrlnoLPS_pvalue	IGF-1 Signaling
435	0	NA	160	28	4h_DINCH_10nM_ctrlnoLPS	4h_ctrlnoLPS_pvalue	IL-12 Signaling and Production in Macrophages
436	0.158367845	0.447	269	26	4h_DINCH_10nM_ctrlnoLPS	4h_ctrlnoLPS_pvalue	IL-15 Signaling
437	0.234741644	0	282	23	4h_DINCH_10nM_ctrlnoLPS	4h_ctrlnoLPS_pvalue	IL-3 Signaling
438	0	NA	202	28	4h_DINCH_10nM_ctrlnoLPS	4h_ctrlnoLPS_pvalue	IL-4 Signaling
439	1.145517398	-0.688	183	27	4h_DINCH_10nM_ctrlnoLPS	4h_ctrlnoLPS_pvalue	IL-8 Signaling
440	0.375922049	1	274	26	4h_DINCH_10nM_ctrlnoLPS	4h_ctrlnoLPS_pvalue	IL-9 Signaling
441	0.740843899	-0.775	69	13	4h_DINCH_10nM_ctrlnoLPS	4h_ctrlnoLPS_pvalue	ILK Signaling
442	0.714606035	0	239	28	4h_DINCH_10nM_ctrlnoLPS	4h_ctrlnoLPS_pvalue	Inflammasome pathway
443	0	-2.236	60	7	4h_DINCH_10nM_ctrlnoLPS	4h_ctrlnoLPS_pvalue	Inhibition of ARE-Mediated mRNA Degradation Pathway
444	0.906726661	NA	132	28	4h_DINCH_10nM_ctrlnoLPS	4h_ctrlnoLPS_pvalue	Inosine-5'-phosphate Biosynthesis II
445	2.143782705	-1.633	152	23	4h_DINCH_10nM_ctrlnoLPS	4h_ctrlnoLPS_pvalue	Insulin Secretion Signaling Pathway
446	0.857357274	-0.471	67	16	4h_DINCH_10nM_ctrlnoLPS	4h_ctrlnoLPS_pvalue	Integrin Signaling
447	0.216951082	NA	52	8	4h_DINCH_10nM_ctrlnoLPS	4h_ctrlnoLPS_pvalue	Interferon Signaling
448	0.268891149	NA	156	28	4h_DINCH_10nM_ctrlnoLPS	4h_ctrlnoLPS_pvalue	Iron homeostasis signaling pathway
449	3.184050714	0.447	96	25	4h_DINCH_10nM_ctrlnoLPS	4h_ctrlnoLPS_pvalue	Isoleucine Degradation I
450	0.31638551	0.378	275	26	4h_DINCH_10nM_ctrlnoLPS	4h_ctrlnoLPS_pvalue	JAK/Stat Signaling
451	1.293925077	NA	87	28	4h_DINCH_10nM_ctrlnoLPS	4h_ctrlnoLPS_pvalue	Ketogenesis
452	1.802734037	NA	193	28	4h_DINCH_10nM_ctrlnoLPS	4h_ctrlnoLPS_pvalue	Ketolysis
453	0.295939166	NA	48	28	4h_DINCH_10nM_ctrlnoLPS	4h_ctrlnoLPS_pvalue	L-cysteine Degradation I
454	0.411862925	NA	172	28	4h_DINCH_10nM_ctrlnoLPS	4h_ctrlnoLPS_pvalue	Leucine Degradation I
455	0.94082625	-0.243	166	16	4h_DINCH_10nM_ctrlnoLPS	4h_ctrlnoLPS_pvalue	Leukocyte Extravasation Signaling
456	0.62693407	NA	106	28	4h_DINCH_10nM_ctrlnoLPS	4h_ctrlnoLPS_pvalue	Lipid Antigen Presentation by CD1
457	0.267877929	-0.447	248	20	4h_DINCH_10nM_ctrlnoLPS	4h_ctrlnoLPS_pvalue	LPS/IL-1 Mediated Inhibition of RXR Function
458	0.545531366	-0.816	93	18	4h_DINCH_10nM_ctrlnoLPS	4h_ctrlnoLPS_pvalue	LXR/RXR Activation
459	0.583456758	NA	264	23	4h_DINCH_10nM_ctrlnoLPS	4h_ctrlnoLPS_pvalue	Macropinocytosis Signaling
460	0.295939166	NA	174	28	4h_DINCH_10nM_ctrlnoLPS	4h_ctrlnoLPS_pvalue	Mechanisms of Viral Exit from Host Cells
461	0.314319991	0	170	27	4h_DINCH_10nM_ctrlnoLPS	4h_ctrlnoLPS_pvalue	Melatonin Signaling
462	0.295939166	NA	200	28	4h_DINCH_10nM_ctrlnoLPS	4h_ctrlnoLPS_pvalue	Methylglyoxal Degradation III
463	0.658431692	NA	216	28	4h_DINCH_10nM_ctrlnoLPS	4h_ctrlnoLPS_pvalue	Mevalonate Pathway I
464	0.701081596	0.447	220	28	4h_DINCH_10nM_ctrlnoLPS	4h_ctrlnoLPS_pvalue	MIF-mediated Glucocorticoid Regulation
465	0.083895424	NA	203	28	4h_DINCH_10nM_ctrlnoLPS	4h_ctrlnoLPS_pvalue	Mismatch Repair in Eukaryotes
466	6.416018169	NA	169	28	4h_DINCH_10nM_ctrlnoLPS	4h_ctrlnoLPS_pvalue	Mitochondrial Dysfunction
467	0.62693407	NA	161	28	4h_DINCH_10nM_ctrlnoLPS	4h_ctrlnoLPS_pvalue	Mitochondrial L-carnitine Shuttle Pathway
468	0.267877929	NA	103	28	4h_DINCH_10nM_ctrlnoLPS	4h_ctrlnoLPS_pvalue	Mitotic Roles of Polo-Like Kinase
469	0.238073291	0	55	26	4h_DINCH_10nM_ctrlnoLPS	4h_ctrlnoLPS_pvalue	mTOR Signaling
470	0.701081596	NA	80	28	4h_DINCH_10nM_ctrlnoLPS	4h_ctrlnoLPS_pvalue	Myo-inositol Biosynthesis
471	0.31638551	-0.535	74	12	4h_DINCH_10nM_ctrlnoLPS	4h_ctrlnoLPS_pvalue	Natural Killer Cell Signaling
472	0.376026298	-0.577	86	25	4h_DINCH_10nM_ctrlnoLPS	4h_ctrlnoLPS_pvalue	Necroptosis Signaling Pathway
473	0.20409063	-1.633	142	20	4h_DINCH_10nM_ctrlnoLPS	4h_ctrlnoLPS_pvalue	NER Pathway
474	0	NA	217	28	4h_DINCH_10nM_ctrlnoLPS	4h_ctrlnoLPS_pvalue	Netrin Signaling
475	0.158016945	-0.447	65	23	4h_DINCH_10nM_ctrlnoLPS	4h_ctrlnoLPS_pvalue	Neuregulin Signaling
476	0.277636141	NA	215	28	4h_DINCH_10nM_ctrlnoLPS	4h_ctrlnoLPS_pvalue	nNOS Signaling in Neurons
477	1.284737307	-0.333	6	12	4h_DINCH_10nM_ctrlnoLPS	4h_ctrlnoLPS_pvalue	NRF2-mediated Oxidative Stress Response
478	0.411862925	1.342	288	26	4h_DINCH_10nM_ctrlnoLPS	4h_ctrlnoLPS_pvalue	Oncostatin M Signaling
479	0.791110553	-1.789	88	4	4h_DINCH_10nM_ctrlnoLPS	4h_ctrlnoLPS_pvalue	Opioid Signaling Pathway
480	0.111785195	NA	112	28	4h_DINCH_10nM_ctrlnoLPS	4h_ctrlnoLPS_pvalue	Oxidative Ethanol Degradation III
481	4.309997736	4.472	13	1	4h_DINCH_10nM_ctrlnoLPS	4h_ctrlnoLPS_pvalue	Oxidative Phosphorylation
482	0.31638551	NA	179	28	4h_DINCH_10nM_ctrlnoLPS	4h_ctrlnoLPS_pvalue	Oxidized GTP and dGTP Detoxification
483	0.267877929	0.333	277	27	4h_DINCH_10nM_ctrlnoLPS	4h_ctrlnoLPS_pvalue	P2Y Purigenic Receptor Signaling Pathway
484	0.781308839	-0.632	51	23	4h_DINCH_10nM_ctrlnoLPS	4h_ctrlnoLPS_pvalue	p70S6K Signaling
485	0.20409063	0.816	14	14	4h_DINCH_10nM_ctrlnoLPS	4h_ctrlnoLPS_pvalue	PAK Signaling
486	0.701081596	-1	9	13	4h_DINCH_10nM_ctrlnoLPS	4h_ctrlnoLPS_pvalue	Paxillin Signaling
487	0.786817051	NA	241	20	4h_DINCH_10nM_ctrlnoLPS	4h_ctrlnoLPS_pvalue	Pentose Phosphate Pathway
488	0.62693407	NA	194	28	4h_DINCH_10nM_ctrlnoLPS	4h_ctrlnoLPS_pvalue	Pentose Phosphate Pathway (Non-oxidative Branch)
489	0.295939166	NA	205	28	4h_DINCH_10nM_ctrlnoLPS	4h_ctrlnoLPS_pvalue	Pentose Phosphate Pathway (Oxidative Branch)
490	0.62693407	0.447	256	27	4h_DINCH_10nM_ctrlnoLPS	4h_ctrlnoLPS_pvalue	PFKFB4 Signaling Pathway
491	0	NA	168	28	4h_DINCH_10nM_ctrlnoLPS	4h_ctrlnoLPS_pvalue	Phagosome Formation
492	3.593442869	NA	189	28	4h_DINCH_10nM_ctrlnoLPS	4h_ctrlnoLPS_pvalue	Phagosome Maturation
493	0.701081596	NA	100	28	4h_DINCH_10nM_ctrlnoLPS	4h_ctrlnoLPS_pvalue	Phenylalanine Degradation IV (Mammalian, via Side Chain)
494	0.294418756	-0.577	292	27	4h_DINCH_10nM_ctrlnoLPS	4h_ctrlnoLPS_pvalue	Phospholipase C Signaling
495	0.675066384	0	249	23	4h_DINCH_10nM_ctrlnoLPS	4h_ctrlnoLPS_pvalue	PI3K Signaling in B Lymphocytes
496	0.136401517	-1.897	61	6	4h_DINCH_10nM_ctrlnoLPS	4h_ctrlnoLPS_pvalue	PI3K/AKT Signaling
497	0	-0.378	181	23	4h_DINCH_10nM_ctrlnoLPS	4h_ctrlnoLPS_pvalue	PKC? Signaling in T Lymphocytes
498	0.231171353	-1.134	135	17	4h_DINCH_10nM_ctrlnoLPS	4h_ctrlnoLPS_pvalue	PPAR Signaling
499	0.400022678	-1.732	289	18	4h_DINCH_10nM_ctrlnoLPS	4h_ctrlnoLPS_pvalue	PPAR?/RXR? Activation
500	0.131597195	NA	122	28	4h_DINCH_10nM_ctrlnoLPS	4h_ctrlnoLPS_pvalue	Pregnenolone Biosynthesis
501	0.185098948	-0.333	261	28	4h_DINCH_10nM_ctrlnoLPS	4h_ctrlnoLPS_pvalue	Production of Nitric Oxide and Reactive Oxygen Species in Macrophages
502	0.231171353	1	46	26	4h_DINCH_10nM_ctrlnoLPS	4h_ctrlnoLPS_pvalue	Prolactin Signaling
503	0	NA	197	28	4h_DINCH_10nM_ctrlnoLPS	4h_ctrlnoLPS_pvalue	Prostate Cancer Signaling
504	0.734781641	-1.633	62	6	4h_DINCH_10nM_ctrlnoLPS	4h_ctrlnoLPS_pvalue	Protein Kinase A Signaling
505	6.416018169	NA	138	28	4h_DINCH_10nM_ctrlnoLPS	4h_ctrlnoLPS_pvalue	Protein Ubiquitination Pathway
506	0.267877929	1	25	10	4h_DINCH_10nM_ctrlnoLPS	4h_ctrlnoLPS_pvalue	PTEN Signaling
507	1.293925077	2	236	29	4h_DINCH_10nM_ctrlnoLPS	4h_ctrlnoLPS_pvalue	Purine Nucleotides De Novo Biosynthesis II
508	0.234299744	NA	141	28	4h_DINCH_10nM_ctrlnoLPS	4h_ctrlnoLPS_pvalue	Purine Ribonucleosides Degradation to Ribose-1-phosphate
509	0.376026298	NA	223	28	4h_DINCH_10nM_ctrlnoLPS	4h_ctrlnoLPS_pvalue	Pyrimidine Deoxyribonucleotides De Novo Biosynthesis I
510	0.295939166	1	257	29	4h_DINCH_10nM_ctrlnoLPS	4h_ctrlnoLPS_pvalue	Pyrimidine Ribonucleotides De Novo Biosynthesis
511	0.295939166	NA	127	28	4h_DINCH_10nM_ctrlnoLPS	4h_ctrlnoLPS_pvalue	Pyruvate Fermentation to Lactate
512	0.62693407	0.302	49	14	4h_DINCH_10nM_ctrlnoLPS	4h_ctrlnoLPS_pvalue	Rac Signaling
513	0.277636141	NA	224	25	4h_DINCH_10nM_ctrlnoLPS	4h_ctrlnoLPS_pvalue	RAN Signaling
514	0.289864283	0.378	231	28	4h_DINCH_10nM_ctrlnoLPS	4h_ctrlnoLPS_pvalue	RANK Signaling in Osteoclasts
515	0.295939166	NA	151	28	4h_DINCH_10nM_ctrlnoLPS	4h_ctrlnoLPS_pvalue	Rapoport-Luebering Glycolytic Shunt
516	0.319033466	-0.707	77	13	4h_DINCH_10nM_ctrlnoLPS	4h_ctrlnoLPS_pvalue	Reelin Signaling in Neurons
517	0.327769367	0.816	32	16	4h_DINCH_10nM_ctrlnoLPS	4h_ctrlnoLPS_pvalue	Regulation of Actin-based Motility by Rho
518	2.370409124	-1.134	34	23	4h_DINCH_10nM_ctrlnoLPS	4h_ctrlnoLPS_pvalue	Regulation of Cellular Mechanics by Calpain Protease
519	0.930459129	-1	268	23	4h_DINCH_10nM_ctrlnoLPS	4h_ctrlnoLPS_pvalue	Regulation of eIF4 and p70S6K Signaling
520	0.185098948	NA	105	28	4h_DINCH_10nM_ctrlnoLPS	4h_ctrlnoLPS_pvalue	Regulation of IL-2 Expression in Activated and Anergic T Lymphocytes
521	4.14117771	-0.447	263	26	4h_DINCH_10nM_ctrlnoLPS	4h_ctrlnoLPS_pvalue	Remodeling of Epithelial Adherens Junctions
522	0	NA	97	12	4h_DINCH_10nM_ctrlnoLPS	4h_ctrlnoLPS_pvalue	Renal Cell Carcinoma Signaling
523	0.234027567	0.378	70	14	4h_DINCH_10nM_ctrlnoLPS	4h_ctrlnoLPS_pvalue	Renin-Angiotensin Signaling
524	0.267877929	0	11	13	4h_DINCH_10nM_ctrlnoLPS	4h_ctrlnoLPS_pvalue	RhoA Signaling
525	0.411862925	0.333	134	22	4h_DINCH_10nM_ctrlnoLPS	4h_ctrlnoLPS_pvalue	RhoGDI Signaling
526	0.701081596	NA	199	28	4h_DINCH_10nM_ctrlnoLPS	4h_ctrlnoLPS_pvalue	Role of IL-17A in Psoriasis
527	0.295939166	1	225	29	4h_DINCH_10nM_ctrlnoLPS	4h_ctrlnoLPS_pvalue	Role of IL-17F in Allergic Inflammatory Airway Diseases
528	0.62693407	NA	124	28	4h_DINCH_10nM_ctrlnoLPS	4h_ctrlnoLPS_pvalue	Role of JAK1, JAK2 and TYK2 in Interferon Signaling
529	0.234027567	-0.832	137	12	4h_DINCH_10nM_ctrlnoLPS	4h_ctrlnoLPS_pvalue	Role of NFAT in Cardiac Hypertrophy
530	0.31638551	-0.302	265	27	4h_DINCH_10nM_ctrlnoLPS	4h_ctrlnoLPS_pvalue	Role of NFAT in Regulation of the Immune Response
531	0.295939166	-0.447	258	27	4h_DINCH_10nM_ctrlnoLPS	4h_ctrlnoLPS_pvalue	Role of PI3K/AKT Signaling in the Pathogenesis of Influenza
532	0.295939166	2.333	22	3	4h_DINCH_10nM_ctrlnoLPS	4h_ctrlnoLPS_pvalue	Role of PKR in Interferon Induction and Antiviral Response
533	0.327769367	1	230	29	4h_DINCH_10nM_ctrlnoLPS	4h_ctrlnoLPS_pvalue	Role of RIG1-like Receptors in Antiviral Innate Immunity
534	0.410916018	NA	158	28	4h_DINCH_10nM_ctrlnoLPS	4h_ctrlnoLPS_pvalue	Role of Tissue Factor in Cancer
535	0.38054263	NA	121	28	4h_DINCH_10nM_ctrlnoLPS	4h_ctrlnoLPS_pvalue	S-adenosyl-L-methionine Biosynthesis
536	0.234299744	NA	123	28	4h_DINCH_10nM_ctrlnoLPS	4h_ctrlnoLPS_pvalue	Selenocysteine Biosynthesis II (Archaea and Eukaryotes)
537	0.255908646	0.707	7	10	4h_DINCH_10nM_ctrlnoLPS	4h_ctrlnoLPS_pvalue	Semaphorin Neuronal Repulsive Signaling Pathway
538	0.218060909	NA	131	28	4h_DINCH_10nM_ctrlnoLPS	4h_ctrlnoLPS_pvalue	Semaphorin Signaling in Neurons
539	0.294418756	-0.243	120	18	4h_DINCH_10nM_ctrlnoLPS	4h_ctrlnoLPS_pvalue	Senescence Pathway
540	0.781308839	NA	94	28	4h_DINCH_10nM_ctrlnoLPS	4h_ctrlnoLPS_pvalue	Serine Biosynthesis
541	0.715769872	NA	125	28	4h_DINCH_10nM_ctrlnoLPS	4h_ctrlnoLPS_pvalue	Sertoli Cell-Sertoli Cell Junction Signaling
542	0.781308839	-0.5	119	13	4h_DINCH_10nM_ctrlnoLPS	4h_ctrlnoLPS_pvalue	Signaling by Rho Family GTPases
543	7.452060182	-2.401	36	4	4h_DINCH_10nM_ctrlnoLPS	4h_ctrlnoLPS_pvalue	Sirtuin Signaling Pathway
544	0.18323669	-0.447	259	28	4h_DINCH_10nM_ctrlnoLPS	4h_ctrlnoLPS_pvalue	Sphingosine-1-phosphate Signaling
545	0.805139443	-2.646	18	2	4h_DINCH_10nM_ctrlnoLPS	4h_ctrlnoLPS_pvalue	Spliceosomal Cycle
546	0.701081596	0	232	28	4h_DINCH_10nM_ctrlnoLPS	4h_ctrlnoLPS_pvalue	Stearate Biosynthesis I (Animals)
547	1.802734037	1	244	29	4h_DINCH_10nM_ctrlnoLPS	4h_ctrlnoLPS_pvalue	Sucrose Degradation V (Mammalian)
548	0.545531366	NA	187	28	4h_DINCH_10nM_ctrlnoLPS	4h_ctrlnoLPS_pvalue	Sulfate Activation for Sulfonation
549	0.917718388	0	296	20	4h_DINCH_10nM_ctrlnoLPS	4h_ctrlnoLPS_pvalue	Sumoylation Pathway
550	1.802734037	1	245	26	4h_DINCH_10nM_ctrlnoLPS	4h_ctrlnoLPS_pvalue	Superoxide Radicals Degradation
551	1.143200211	0.447	246	25	4h_DINCH_10nM_ctrlnoLPS	4h_ctrlnoLPS_pvalue	Superpathway of Cholesterol Biosynthesis
552	0.730671837	NA	234	28	4h_DINCH_10nM_ctrlnoLPS	4h_ctrlnoLPS_pvalue	Superpathway of Citrulline Metabolism
553	0.814864886	NA	238	19	4h_DINCH_10nM_ctrlnoLPS	4h_ctrlnoLPS_pvalue	Superpathway of Geranylgeranyldiphosphate Biosynthesis I (via Mevalonate)
554	0.147557516	0.905	3	11	4h_DINCH_10nM_ctrlnoLPS	4h_ctrlnoLPS_pvalue	Superpathway of Inositol Phosphate Compounds
555	0.701081596	-2.236	27	15	4h_DINCH_10nM_ctrlnoLPS	4h_ctrlnoLPS_pvalue	Superpathway of Methionine Degradation
556	1.238757178	NA	235	23	4h_DINCH_10nM_ctrlnoLPS	4h_ctrlnoLPS_pvalue	Superpathway of Serine and Glycine Biosynthesis I
557	0.20409063	-1.414	4	7	4h_DINCH_10nM_ctrlnoLPS	4h_ctrlnoLPS_pvalue	Synaptic Long Term Potentiation
558	0	-1.387	12	12	4h_DINCH_10nM_ctrlnoLPS	4h_ctrlnoLPS_pvalue	Synaptogenesis Signaling Pathway
559	0	-0.277	54	19	4h_DINCH_10nM_ctrlnoLPS	4h_ctrlnoLPS_pvalue	Systemic Lupus Erythematosus In B Cell Signaling Pathway
560	0	-0.302	276	26	4h_DINCH_10nM_ctrlnoLPS	4h_ctrlnoLPS_pvalue	Systemic Lupus Erythematosus In T Cell Signaling Pathway
561	0.31638551	NA	126	28	4h_DINCH_10nM_ctrlnoLPS	4h_ctrlnoLPS_pvalue	Systemic Lupus Erythematosus Signaling
562	0.185098948	NA	47	28	4h_DINCH_10nM_ctrlnoLPS	4h_ctrlnoLPS_pvalue	T Cell Receptor Signaling
563	0.701081596	1	28	14	4h_DINCH_10nM_ctrlnoLPS	4h_ctrlnoLPS_pvalue	TCA Cycle II (Eukaryotic)
564	0.71473748	0.302	8	11	4h_DINCH_10nM_ctrlnoLPS	4h_ctrlnoLPS_pvalue	Tec Kinase Signaling
565	0	NA	285	27	4h_DINCH_10nM_ctrlnoLPS	4h_ctrlnoLPS_pvalue	Telomerase Signaling
566	0.569253125	NA	196	28	4h_DINCH_10nM_ctrlnoLPS	4h_ctrlnoLPS_pvalue	Telomere Extension by Telomerase
567	0.701081596	NA	175	28	4h_DINCH_10nM_ctrlnoLPS	4h_ctrlnoLPS_pvalue	Tetrahydrofolate Salvage from 5,10-methenyltetrahydrofolate
568	0.686261419	-1.604	82	12	4h_DINCH_10nM_ctrlnoLPS	4h_ctrlnoLPS_pvalue	Thrombin Signaling
569	0.136401517	1	41	26	4h_DINCH_10nM_ctrlnoLPS	4h_ctrlnoLPS_pvalue	Thrombopoietin Signaling
570	0.545531366	NA	148	28	4h_DINCH_10nM_ctrlnoLPS	4h_ctrlnoLPS_pvalue	Thyroid Hormone Biosynthesis
571	0.251556565	NA	118	28	4h_DINCH_10nM_ctrlnoLPS	4h_ctrlnoLPS_pvalue	Tight Junction Signaling
572	0.30232534	0.816	5	11	4h_DINCH_10nM_ctrlnoLPS	4h_ctrlnoLPS_pvalue	TREM1 Signaling
573	4.221730934	-2.309	68	4	4h_DINCH_10nM_ctrlnoLPS	4h_ctrlnoLPS_pvalue	tRNA Charging
574	0.930459129	2	284	29	4h_DINCH_10nM_ctrlnoLPS	4h_ctrlnoLPS_pvalue	Tryptophan Degradation III (Eukaryotic)
575	0.234299744	NA	90	28	4h_DINCH_10nM_ctrlnoLPS	4h_ctrlnoLPS_pvalue	Tryptophan Degradation to 2-amino-3-carboxymuconate Semialdehyde
576	0.096952665	NA	136	28	4h_DINCH_10nM_ctrlnoLPS	4h_ctrlnoLPS_pvalue	Ubiquinol-10 Biosynthesis (Eukaryotic)
577	0.62693407	NA	79	28	4h_DINCH_10nM_ctrlnoLPS	4h_ctrlnoLPS_pvalue	UDP-N-acetyl-D-glucosamine Biosynthesis II
578	0.410916018	-1.633	33	6	4h_DINCH_10nM_ctrlnoLPS	4h_ctrlnoLPS_pvalue	Unfolded protein response
579	0.267877929	NA	98	28	4h_DINCH_10nM_ctrlnoLPS	4h_ctrlnoLPS_pvalue	Urea Cycle
580	0	NA	91	28	4h_DINCH_10nM_ctrlnoLPS	4h_ctrlnoLPS_pvalue	Uridine-5'-phosphate Biosynthesis
581	0.147193501	0	281	23	4h_DINCH_10nM_ctrlnoLPS	4h_ctrlnoLPS_pvalue	UVA-Induced MAPK Signaling
582	1.842443946	0.447	242	25	4h_DINCH_10nM_ctrlnoLPS	4h_ctrlnoLPS_pvalue	Valine Degradation I
583	1.699888714	-0.302	63	12	4h_DINCH_10nM_ctrlnoLPS	4h_ctrlnoLPS_pvalue	VEGF Signaling
584	1.842443946	NA	157	28	4h_DINCH_10nM_ctrlnoLPS	4h_ctrlnoLPS_pvalue	Virus Entry via Endocytic Pathways
585	0.382115817	NA	146	28	4h_DINCH_10nM_ctrlnoLPS	4h_ctrlnoLPS_pvalue	Vitamin-C Transport
586	0.294418756	-0.447	240	28	4h_DINCH_10nM_ctrlnoLPS	4h_ctrlnoLPS_pvalue	Wnt/Ca+ pathway
587	0.545531366	NA	167	28	4h_DINCH_10nM_ctrlnoLPS	4h_ctrlnoLPS_pvalue	Xanthine and Xanthosine Salvage
588	0.605817953	0	50	22	4h_DINCH_10nM_ctrlnoLPS	4h_ctrlnoLPS_pvalue	Xenobiotic Metabolism AHR Signaling Pathway
589	0	-0.378	159	18	4h_DINCH_10nM_ctrlnoLPS	4h_ctrlnoLPS_pvalue	Xenobiotic Metabolism CAR Signaling Pathway
590	0.134190264	1	78	11	4h_DINCH_10nM_ctrlnoLPS	4h_ctrlnoLPS_pvalue	Xenobiotic Metabolism PXR Signaling Pathway
591	0.324505644	NA	37	28	4h_DINCH_10nM_ctrlnoLPS	4h_ctrlnoLPS_pvalue	Xenobiotic Metabolism Signaling
592	0.234299744	NA	198	28	4h_DINCH_10nM_ctrlnoLPS	4h_ctrlnoLPS_pvalue	Zymosterol Biosynthesis
593	0.572698485	-0.378	35	12	4h_DINCH_100nM_ctrlnoLPS	4h_ctrlnoLPS_pvalue	?-Adrenergic Signaling
594	0.926722833	NA	164	28	4h_DINCH_100nM_ctrlnoLPS	4h_ctrlnoLPS_pvalue	?-glutamyl Cycle
595	0.377361379	NA	221	29	4h_DINCH_100nM_ctrlnoLPS	4h_ctrlnoLPS_pvalue	?-linolenate Biosynthesis II (Animals)
596	0.588570356	-1.667	26	7	4h_DINCH_100nM_ctrlnoLPS	4h_ctrlnoLPS_pvalue	14-3-3-mediated Signaling
597	0.841135812	NA	211	28	4h_DINCH_100nM_ctrlnoLPS	4h_ctrlnoLPS_pvalue	2-ketoglutarate Dehydrogenase Complex
598	0.49965862	1.387	57	11	4h_DINCH_100nM_ctrlnoLPS	4h_ctrlnoLPS_pvalue	3-phosphoinositide Biosynthesis
599	0.462487624	0	219	28	4h_DINCH_100nM_ctrlnoLPS	4h_ctrlnoLPS_pvalue	4-1BB Signaling in T Lymphocytes
600	0.658416847	NA	110	28	4h_DINCH_100nM_ctrlnoLPS	4h_ctrlnoLPS_pvalue	Acetyl-CoA Biosynthesis I (Pyruvate Dehydrogenase Complex)
601	0.572698485	NA	108	28	4h_DINCH_100nM_ctrlnoLPS	4h_ctrlnoLPS_pvalue	Acetyl-CoA Biosynthesis III (from Citrate)
602	0.901098743	-1.213	58	16	4h_DINCH_100nM_ctrlnoLPS	4h_ctrlnoLPS_pvalue	Actin Cytoskeleton Signaling
603	0.51990499	-1.633	81	13	4h_DINCH_100nM_ctrlnoLPS	4h_ctrlnoLPS_pvalue	Actin Nucleation by ARP-WASP Complex
604	0.379101875	1.342	21	11	4h_DINCH_100nM_ctrlnoLPS	4h_ctrlnoLPS_pvalue	Activation of IRF by Cytosolic Pattern Recognition Receptors
605	0.170252987	-0.447	267	23	4h_DINCH_100nM_ctrlnoLPS	4h_ctrlnoLPS_pvalue	Acute Myeloid Leukemia Signaling
606	0	NA	180	28	4h_DINCH_100nM_ctrlnoLPS	4h_ctrlnoLPS_pvalue	Adenine and Adenosine Salvage I
607	0.301654396	NA	117	28	4h_DINCH_100nM_ctrlnoLPS	4h_ctrlnoLPS_pvalue	Adenine and Adenosine Salvage III
608	0	NA	165	28	4h_DINCH_100nM_ctrlnoLPS	4h_ctrlnoLPS_pvalue	Adenine and Adenosine Salvage VI
609	0.38586573	NA	56	28	4h_DINCH_100nM_ctrlnoLPS	4h_ctrlnoLPS_pvalue	Agranulocyte Adhesion and Diapedesis
610	0.370409313	0	84	13	4h_DINCH_100nM_ctrlnoLPS	4h_ctrlnoLPS_pvalue	Agrin Interactions at Neuromuscular Junction
611	0.75909089	0.447	233	28	4h_DINCH_100nM_ctrlnoLPS	4h_ctrlnoLPS_pvalue	Aldosterone Signaling in Epithelial Cells
612	0.866480448	2.236	64	24	4h_DINCH_100nM_ctrlnoLPS	4h_ctrlnoLPS_pvalue	Amyloid Processing
613	0.272649227	0.447	286	20	4h_DINCH_100nM_ctrlnoLPS	4h_ctrlnoLPS_pvalue	Angiopoietin Signaling
614	0.399770184	NA	72	28	4h_DINCH_100nM_ctrlnoLPS	4h_ctrlnoLPS_pvalue	Antigen Presentation Pathway
615	0.688173862	-1.134	270	27	4h_DINCH_100nM_ctrlnoLPS	4h_ctrlnoLPS_pvalue	Antioxidant Action of Vitamin C
616	0.165490072	-1	279	27	4h_DINCH_100nM_ctrlnoLPS	4h_ctrlnoLPS_pvalue	Antiproliferative Role of Somatostatin Receptor 2
617	0.822949031	1	280	26	4h_DINCH_100nM_ctrlnoLPS	4h_ctrlnoLPS_pvalue	Apelin Adipocyte Signaling Pathway
618	0.462487624	0	278	20	4h_DINCH_100nM_ctrlnoLPS	4h_ctrlnoLPS_pvalue	Apelin Cardiomyocyte Signaling Pathway
619	0.384047809	-1	287	27	4h_DINCH_100nM_ctrlnoLPS	4h_ctrlnoLPS_pvalue	Apelin Endothelial Signaling Pathway
620	0.688173862	0.632	293	28	4h_DINCH_100nM_ctrlnoLPS	4h_ctrlnoLPS_pvalue	Apoptosis Signaling
621	0.321514465	NA	85	28	4h_DINCH_100nM_ctrlnoLPS	4h_ctrlnoLPS_pvalue	Arginine Biosynthesis IV
622	0.367935902	NA	101	28	4h_DINCH_100nM_ctrlnoLPS	4h_ctrlnoLPS_pvalue	Arsenate Detoxification I (Glutaredoxin)
623	0.75909089	0.378	253	28	4h_DINCH_100nM_ctrlnoLPS	4h_ctrlnoLPS_pvalue	Aryl Hydrocarbon Receptor Signaling
624	0	NA	207	28	4h_DINCH_100nM_ctrlnoLPS	4h_ctrlnoLPS_pvalue	Asparagine Biosynthesis I
625	0.938427464	NA	195	28	4h_DINCH_100nM_ctrlnoLPS	4h_ctrlnoLPS_pvalue	Aspartate Biosynthesis
626	0.658416847	NA	128	28	4h_DINCH_100nM_ctrlnoLPS	4h_ctrlnoLPS_pvalue	Aspartate Degradation II
627	0.422424515	NA	149	28	4h_DINCH_100nM_ctrlnoLPS	4h_ctrlnoLPS_pvalue	Atherosclerosis Signaling
628	0.41822449	-0.816	19	18	4h_DINCH_100nM_ctrlnoLPS	4h_ctrlnoLPS_pvalue	ATM Signaling
629	1.403292406	NA	143	28	4h_DINCH_100nM_ctrlnoLPS	4h_ctrlnoLPS_pvalue	Autophagy
630	0.374437532	NA	42	28	4h_DINCH_100nM_ctrlnoLPS	4h_ctrlnoLPS_pvalue	Axonal Guidance Signaling
631	0.454190749	-0.277	177	12	4h_DINCH_100nM_ctrlnoLPS	4h_ctrlnoLPS_pvalue	B Cell Receptor Signaling
632	2.077682303	-1	76	4	4h_DINCH_100nM_ctrlnoLPS	4h_ctrlnoLPS_pvalue	BAG2 Signaling Pathway
633	0.407899251	NA	206	28	4h_DINCH_100nM_ctrlnoLPS	4h_ctrlnoLPS_pvalue	BER pathway
634	0	NA	113	28	4h_DINCH_100nM_ctrlnoLPS	4h_ctrlnoLPS_pvalue	Bile Acid Biosynthesis, Neutral Pathway
635	0.367935902	NA	144	28	4h_DINCH_100nM_ctrlnoLPS	4h_ctrlnoLPS_pvalue	Branched-chain ?-keto acid Dehydrogenase Complex
636	0.462487624	-0.447	243	28	4h_DINCH_100nM_ctrlnoLPS	4h_ctrlnoLPS_pvalue	Calcium-induced T Lymphocyte Apoptosis
637	0.49965862	-1	290	25	4h_DINCH_100nM_ctrlnoLPS	4h_ctrlnoLPS_pvalue	Cardiac Hypertrophy Signaling
638	2.457388912	NA	204	28	4h_DINCH_100nM_ctrlnoLPS	4h_ctrlnoLPS_pvalue	Caveolar-mediated Endocytosis Signaling
639	0.211653426	-0.447	89	12	4h_DINCH_100nM_ctrlnoLPS	4h_ctrlnoLPS_pvalue	CCR3 Signaling in Eosinophils
640	0.271896321	-1	260	27	4h_DINCH_100nM_ctrlnoLPS	4h_ctrlnoLPS_pvalue	CD27 Signaling in Lymphocytes
641	0.588570356	-1.667	182	27	4h_DINCH_100nM_ctrlnoLPS	4h_ctrlnoLPS_pvalue	CD28 Signaling in T Helper Cells
642	0.301654396	0.447	251	29	4h_DINCH_100nM_ctrlnoLPS	4h_ctrlnoLPS_pvalue	CD40 Signaling
643	0.883607013	-1.265	73	13	4h_DINCH_100nM_ctrlnoLPS	4h_ctrlnoLPS_pvalue	Cdc42 Signaling
644	0.462487624	-2.121	59	12	4h_DINCH_100nM_ctrlnoLPS	4h_ctrlnoLPS_pvalue	CDK5 Signaling
645	0.38586573	1.342	10	21	4h_DINCH_100nM_ctrlnoLPS	4h_ctrlnoLPS_pvalue	Cell Cycle Control of Chromosomal Replication
646	0.177828459	NA	218	28	4h_DINCH_100nM_ctrlnoLPS	4h_ctrlnoLPS_pvalue	Cell Cycle: G2/M DNA Damage Checkpoint Regulation
647	0.377361379	-1.134	291	27	4h_DINCH_100nM_ctrlnoLPS	4h_ctrlnoLPS_pvalue	Ceramide Signaling
648	0.462487624	0.378	271	20	4h_DINCH_100nM_ctrlnoLPS	4h_ctrlnoLPS_pvalue	Chemokine Signaling
649	0.311878332	0.378	163	26	4h_DINCH_100nM_ctrlnoLPS	4h_ctrlnoLPS_pvalue	Cholecystokinin/Gastrin-mediated Signaling
650	0.170252987	NA	115	28	4h_DINCH_100nM_ctrlnoLPS	4h_ctrlnoLPS_pvalue	Cholesterol Biosynthesis I
651	0.170252987	NA	176	28	4h_DINCH_100nM_ctrlnoLPS	4h_ctrlnoLPS_pvalue	Cholesterol Biosynthesis II (via 24,25-dihydrolanosterol)
652	0.170252987	NA	95	28	4h_DINCH_100nM_ctrlnoLPS	4h_ctrlnoLPS_pvalue	Cholesterol Biosynthesis III (via Desmosterol)
653	0.462487624	NA	145	28	4h_DINCH_100nM_ctrlnoLPS	4h_ctrlnoLPS_pvalue	Chronic Myeloid Leukemia Signaling
654	0.321514465	NA	140	28	4h_DINCH_100nM_ctrlnoLPS	4h_ctrlnoLPS_pvalue	Citrulline-Nitric Oxide Cycle
655	0.321514465	NA	130	28	4h_DINCH_100nM_ctrlnoLPS	4h_ctrlnoLPS_pvalue	Citrulline Biosynthesis
656	2.077682303	NA	190	28	4h_DINCH_100nM_ctrlnoLPS	4h_ctrlnoLPS_pvalue	Clathrin-mediated Endocytosis Signaling
657	1.098873689	0	83	17	4h_DINCH_100nM_ctrlnoLPS	4h_ctrlnoLPS_pvalue	Coronavirus Pathogenesis Pathway
658	0.367935902	NA	173	28	4h_DINCH_100nM_ctrlnoLPS	4h_ctrlnoLPS_pvalue	Creatine-phosphate Biosynthesis
659	0.206407252	-1.414	75	7	4h_DINCH_100nM_ctrlnoLPS	4h_ctrlnoLPS_pvalue	CREB Signaling in Neurons
660	0.486465323	NA	114	28	4h_DINCH_100nM_ctrlnoLPS	4h_ctrlnoLPS_pvalue	CTLA4 Signaling in Cytotoxic T Lymphocytes
661	0.447259525	-1.265	40	27	4h_DINCH_100nM_ctrlnoLPS	4h_ctrlnoLPS_pvalue	CXCR4 Signaling
662	0.616143626	1.387	39	11	4h_DINCH_100nM_ctrlnoLPS	4h_ctrlnoLPS_pvalue	D-myo-inositol-5-phosphate Metabolism
663	0.706935156	2	29	24	4h_DINCH_100nM_ctrlnoLPS	4h_ctrlnoLPS_pvalue	D-myo-inositol (1,4,5)-Trisphosphate Biosynthesis
664	0.462487624	0.905	147	11	4h_DINCH_100nM_ctrlnoLPS	4h_ctrlnoLPS_pvalue	D-myo-inositol (1,4,5,6)-Tetrakisphosphate Biosynthesis
665	0.462487624	0.905	133	11	4h_DINCH_100nM_ctrlnoLPS	4h_ctrlnoLPS_pvalue	D-myo-inositol (3,4,5,6)-tetrakisphosphate Biosynthesis
666	0.367935902	-0.378	255	28	4h_DINCH_100nM_ctrlnoLPS	4h_ctrlnoLPS_pvalue	Death Receptor Signaling
667	0.377361379	NA	208	28	4h_DINCH_100nM_ctrlnoLPS	4h_ctrlnoLPS_pvalue	DNA Double-Strand Break Repair by Non-Homologous End Joining
668	0.270291608	NA	226	20	4h_DINCH_100nM_ctrlnoLPS	4h_ctrlnoLPS_pvalue	Dopamine Degradation
669	7.527617388	2.6	20	5	4h_DINCH_100nM_ctrlnoLPS	4h_ctrlnoLPS_pvalue	EIF2 Signaling
670	0.397261521	-0.333	23	20	4h_DINCH_100nM_ctrlnoLPS	4h_ctrlnoLPS_pvalue	Endocannabinoid Neuronal Synapse Pathway
671	0	NA	222	20	4h_DINCH_100nM_ctrlnoLPS	4h_ctrlnoLPS_pvalue	Endoplasmic Reticulum Stress Pathway
672	0.688173862	-0.378	184	20	4h_DINCH_100nM_ctrlnoLPS	4h_ctrlnoLPS_pvalue	Ephrin B Signaling
673	0.434542125	-0.832	1	7	4h_DINCH_100nM_ctrlnoLPS	4h_ctrlnoLPS_pvalue	Ephrin Receptor Signaling
674	0.301654396	NA	192	28	4h_DINCH_100nM_ctrlnoLPS	4h_ctrlnoLPS_pvalue	Epithelial Adherens Junction Signaling
675	0.926722833	0.775	31	19	4h_DINCH_100nM_ctrlnoLPS	4h_ctrlnoLPS_pvalue	ERK/MAPK Signaling
676	0.442568362	NA	186	28	4h_DINCH_100nM_ctrlnoLPS	4h_ctrlnoLPS_pvalue	Erythropoietin Signaling
677	0.388728643	0	229	28	4h_DINCH_100nM_ctrlnoLPS	4h_ctrlnoLPS_pvalue	Estrogen-Dependent Breast Cancer Signaling
678	0.357231648	NA	295	22	4h_DINCH_100nM_ctrlnoLPS	4h_ctrlnoLPS_pvalue	Estrogen Biosynthesis
679	0.967805851	0	273	26	4h_DINCH_100nM_ctrlnoLPS	4h_ctrlnoLPS_pvalue	Estrogen Receptor Signaling
680	0.310662405	NA	227	20	4h_DINCH_100nM_ctrlnoLPS	4h_ctrlnoLPS_pvalue	Ethanol Degradation IV
681	0.926722833	NA	154	28	4h_DINCH_100nM_ctrlnoLPS	4h_ctrlnoLPS_pvalue	FAK Signaling
682	0.534145294	NA	237	26	4h_DINCH_100nM_ctrlnoLPS	4h_ctrlnoLPS_pvalue	FAT10 Signaling Pathway
683	0.559764069	0	247	26	4h_DINCH_100nM_ctrlnoLPS	4h_ctrlnoLPS_pvalue	Fatty Acid ?-oxidation I
684	0.462487624	NA	104	28	4h_DINCH_100nM_ctrlnoLPS	4h_ctrlnoLPS_pvalue	Fatty Acid Activation
685	0.525840136	-1	53	16	4h_DINCH_100nM_ctrlnoLPS	4h_ctrlnoLPS_pvalue	Fc? Receptor-mediated Phagocytosis in Macrophages and Monocytes
686	0.311878332	0.816	102	19	4h_DINCH_100nM_ctrlnoLPS	4h_ctrlnoLPS_pvalue	FLT3 Signaling in Hematopoietic Progenitor Cells
687	0.789550865	-1.732	15	13	4h_DINCH_100nM_ctrlnoLPS	4h_ctrlnoLPS_pvalue	fMLP Signaling in Neutrophils
688	0.321514465	NA	178	28	4h_DINCH_100nM_ctrlnoLPS	4h_ctrlnoLPS_pvalue	Folate Polyglutamylation
689	0.161253017	-1.633	71	6	4h_DINCH_100nM_ctrlnoLPS	4h_ctrlnoLPS_pvalue	G Beta Gamma Signaling
690	0.559764069	NA	109	28	4h_DINCH_100nM_ctrlnoLPS	4h_ctrlnoLPS_pvalue	G Protein Signaling Mediated by Tubby
691	0.39515901	-0.632	262	28	4h_DINCH_100nM_ctrlnoLPS	4h_ctrlnoLPS_pvalue	G?q Signaling
692	0	NA	201	28	4h_DINCH_100nM_ctrlnoLPS	4h_ctrlnoLPS_pvalue	Galactose Degradation I (Leloir Pathway)
693	0.308290962	NA	209	28	4h_DINCH_100nM_ctrlnoLPS	4h_ctrlnoLPS_pvalue	Gap Junction Signaling
694	0.161253017	NA	254	23	4h_DINCH_100nM_ctrlnoLPS	4h_ctrlnoLPS_pvalue	GDNF Family Ligand-Receptor Interactions
695	0.926722833	NA	213	28	4h_DINCH_100nM_ctrlnoLPS	4h_ctrlnoLPS_pvalue	GDP-glucose Biosynthesis
696	0.49447358	NA	191	28	4h_DINCH_100nM_ctrlnoLPS	4h_ctrlnoLPS_pvalue	Germ Cell-Sertoli Cell Junction Signaling
697	0.202551405	-0.707	111	23	4h_DINCH_100nM_ctrlnoLPS	4h_ctrlnoLPS_pvalue	Glioblastoma Multiforme Signaling
698	0.28395767	0	43	26	4h_DINCH_100nM_ctrlnoLPS	4h_ctrlnoLPS_pvalue	Glioma Invasiveness Signaling
699	0.165490072	-0.447	38	12	4h_DINCH_100nM_ctrlnoLPS	4h_ctrlnoLPS_pvalue	Glioma Signaling
700	0.75909089	NA	188	28	4h_DINCH_100nM_ctrlnoLPS	4h_ctrlnoLPS_pvalue	Glucocorticoid Receptor Signaling
701	3.210226214	2.121	2	9	4h_DINCH_100nM_ctrlnoLPS	4h_ctrlnoLPS_pvalue	Gluconeogenesis I
702	0.926722833	NA	214	28	4h_DINCH_100nM_ctrlnoLPS	4h_ctrlnoLPS_pvalue	Glucose and Glucose-1-phosphate Degradation
703	0.938427464	NA	212	28	4h_DINCH_100nM_ctrlnoLPS	4h_ctrlnoLPS_pvalue	Glutamate Degradation II
704	0.572698485	NA	66	28	4h_DINCH_100nM_ctrlnoLPS	4h_ctrlnoLPS_pvalue	Glutamate Removal from Folates
705	0.572698485	NA	185	28	4h_DINCH_100nM_ctrlnoLPS	4h_ctrlnoLPS_pvalue	Glutamine Degradation I
706	0.572698485	NA	266	13	4h_DINCH_100nM_ctrlnoLPS	4h_ctrlnoLPS_pvalue	Glutaryl-CoA Degradation
707	0.789550865	0	228	20	4h_DINCH_100nM_ctrlnoLPS	4h_ctrlnoLPS_pvalue	Glutathione-mediated Detoxification
708	0.480621309	NA	155	11	4h_DINCH_100nM_ctrlnoLPS	4h_ctrlnoLPS_pvalue	Glutathione Redox Reactions I
709	0.841135812	NA	153	28	4h_DINCH_100nM_ctrlnoLPS	4h_ctrlnoLPS_pvalue	Glutathione Redox Reactions II
710	0.301654396	NA	210	28	4h_DINCH_100nM_ctrlnoLPS	4h_ctrlnoLPS_pvalue	Glycine Cleavage Complex
711	0.301654396	NA	171	28	4h_DINCH_100nM_ctrlnoLPS	4h_ctrlnoLPS_pvalue	Glycogen Biosynthesis II (from UDP-D-Glucose)
712	3.727117922	0.816	92	11	4h_DINCH_100nM_ctrlnoLPS	4h_ctrlnoLPS_pvalue	Glycogen Degradation II
713	4.241747823	1.134	45	11	4h_DINCH_100nM_ctrlnoLPS	4h_ctrlnoLPS_pvalue	Glycogen Degradation III
714	3.210226214	2.828	24	3	4h_DINCH_100nM_ctrlnoLPS	4h_ctrlnoLPS_pvalue	Glycolysis I
715	0.26302722	-1	16	12	4h_DINCH_100nM_ctrlnoLPS	4h_ctrlnoLPS_pvalue	GM-CSF Signaling
716	0.335811921	-0.905	17	7	4h_DINCH_100nM_ctrlnoLPS	4h_ctrlnoLPS_pvalue	GNRH Signaling
717	0.462487624	-0.816	250	27	4h_DINCH_100nM_ctrlnoLPS	4h_ctrlnoLPS_pvalue	GPCR-Mediated Integration of Enteroendocrine Signaling Exemplified by an L Cell
718	0.943943698	NA	150	28	4h_DINCH_100nM_ctrlnoLPS	4h_ctrlnoLPS_pvalue	Granzyme A Signaling
719	0.572698485	NA	252	22	4h_DINCH_100nM_ctrlnoLPS	4h_ctrlnoLPS_pvalue	Granzyme B Signaling
720	0.462487624	NA	107	28	4h_DINCH_100nM_ctrlnoLPS	4h_ctrlnoLPS_pvalue	Guanine and Guanosine Salvage I
721	0.367935902	NA	129	28	4h_DINCH_100nM_ctrlnoLPS	4h_ctrlnoLPS_pvalue	Heme Biosynthesis from Uroporphyrinogen-III I
722	0	NA	99	28	4h_DINCH_100nM_ctrlnoLPS	4h_ctrlnoLPS_pvalue	Heme Degradation
723	0.384047809	2.138	30	9	4h_DINCH_100nM_ctrlnoLPS	4h_ctrlnoLPS_pvalue	HIF1? Signaling
724	0.397261521	2.236	44	10	4h_DINCH_100nM_ctrlnoLPS	4h_ctrlnoLPS_pvalue	HIPPO signaling
725	0.201146134	0	139	26	4h_DINCH_100nM_ctrlnoLPS	4h_ctrlnoLPS_pvalue	HMGB1 Signaling
726	0.658416847	0	294	22	4h_DINCH_100nM_ctrlnoLPS	4h_ctrlnoLPS_pvalue	Huntington's Disease Signaling
727	0.64674104	NA	162	28	4h_DINCH_100nM_ctrlnoLPS	4h_ctrlnoLPS_pvalue	Hypoxia Signaling in the Cardiovascular System
728	0.397261521	NA	116	28	4h_DINCH_100nM_ctrlnoLPS	4h_ctrlnoLPS_pvalue	Hypusine Biosynthesis
729	0.252804631	-0.816	283	27	4h_DINCH_100nM_ctrlnoLPS	4h_ctrlnoLPS_pvalue	iCOS-iCOSL Signaling in T Helper Cells
730	0.370409313	-1.342	272	27	4h_DINCH_100nM_ctrlnoLPS	4h_ctrlnoLPS_pvalue	IGF-1 Signaling
731	0.384047809	NA	160	28	4h_DINCH_100nM_ctrlnoLPS	4h_ctrlnoLPS_pvalue	IL-12 Signaling and Production in Macrophages
732	0.450923169	0.378	269	26	4h_DINCH_100nM_ctrlnoLPS	4h_ctrlnoLPS_pvalue	IL-15 Signaling
733	0.531355552	0	282	23	4h_DINCH_100nM_ctrlnoLPS	4h_ctrlnoLPS_pvalue	IL-3 Signaling
734	0.201146134	NA	202	28	4h_DINCH_100nM_ctrlnoLPS	4h_ctrlnoLPS_pvalue	IL-4 Signaling
735	0.355580077	-1.155	183	27	4h_DINCH_100nM_ctrlnoLPS	4h_ctrlnoLPS_pvalue	IL-8 Signaling
736	0.462487624	1	274	26	4h_DINCH_100nM_ctrlnoLPS	4h_ctrlnoLPS_pvalue	IL-9 Signaling
737	0.85269341	-0.535	69	13	4h_DINCH_100nM_ctrlnoLPS	4h_ctrlnoLPS_pvalue	ILK Signaling
738	0.789550865	0	239	28	4h_DINCH_100nM_ctrlnoLPS	4h_ctrlnoLPS_pvalue	Inflammasome pathway
739	0.75909089	0	60	7	4h_DINCH_100nM_ctrlnoLPS	4h_ctrlnoLPS_pvalue	Inhibition of ARE-Mediated mRNA Degradation Pathway
740	0	NA	132	28	4h_DINCH_100nM_ctrlnoLPS	4h_ctrlnoLPS_pvalue	Inosine-5'-phosphate Biosynthesis II
741	1.990809236	0.209	152	23	4h_DINCH_100nM_ctrlnoLPS	4h_ctrlnoLPS_pvalue	Insulin Secretion Signaling Pathway
742	1.40564446	-0.894	67	16	4h_DINCH_100nM_ctrlnoLPS	4h_ctrlnoLPS_pvalue	Integrin Signaling
743	0.286802647	NA	52	8	4h_DINCH_100nM_ctrlnoLPS	4h_ctrlnoLPS_pvalue	Interferon Signaling
744	0.262658135	NA	156	28	4h_DINCH_100nM_ctrlnoLPS	4h_ctrlnoLPS_pvalue	Iron homeostasis signaling pathway
745	0.926722833	NA	96	25	4h_DINCH_100nM_ctrlnoLPS	4h_ctrlnoLPS_pvalue	Isoleucine Degradation I
746	0.525840136	0	275	26	4h_DINCH_100nM_ctrlnoLPS	4h_ctrlnoLPS_pvalue	JAK/Stat Signaling
747	0.442568362	NA	87	28	4h_DINCH_100nM_ctrlnoLPS	4h_ctrlnoLPS_pvalue	Ketogenesis
748	0.525840136	NA	193	28	4h_DINCH_100nM_ctrlnoLPS	4h_ctrlnoLPS_pvalue	Ketolysis
749	0.841135812	NA	48	28	4h_DINCH_100nM_ctrlnoLPS	4h_ctrlnoLPS_pvalue	L-cysteine Degradation I
750	0.223891471	NA	172	28	4h_DINCH_100nM_ctrlnoLPS	4h_ctrlnoLPS_pvalue	Leucine Degradation I
751	0.998426009	0.728	166	16	4h_DINCH_100nM_ctrlnoLPS	4h_ctrlnoLPS_pvalue	Leukocyte Extravasation Signaling
752	0.422424515	NA	106	28	4h_DINCH_100nM_ctrlnoLPS	4h_ctrlnoLPS_pvalue	Lipid Antigen Presentation by CD1
753	0.360750846	-0.447	248	20	4h_DINCH_100nM_ctrlnoLPS	4h_ctrlnoLPS_pvalue	LPS/IL-1 Mediated Inhibition of RXR Function
754	0.462487624	-1.134	93	18	4h_DINCH_100nM_ctrlnoLPS	4h_ctrlnoLPS_pvalue	LXR/RXR Activation
755	0.462487624	NA	264	23	4h_DINCH_100nM_ctrlnoLPS	4h_ctrlnoLPS_pvalue	Macropinocytosis Signaling
756	0.233042844	NA	174	28	4h_DINCH_100nM_ctrlnoLPS	4h_ctrlnoLPS_pvalue	Mechanisms of Viral Exit from Host Cells
757	0.397261521	-0.816	170	27	4h_DINCH_100nM_ctrlnoLPS	4h_ctrlnoLPS_pvalue	Melatonin Signaling
758	0.658416847	NA	200	28	4h_DINCH_100nM_ctrlnoLPS	4h_ctrlnoLPS_pvalue	Methylglyoxal Degradation III
759	0.694444775	NA	216	28	4h_DINCH_100nM_ctrlnoLPS	4h_ctrlnoLPS_pvalue	Mevalonate Pathway I
760	0.321514465	NA	220	28	4h_DINCH_100nM_ctrlnoLPS	4h_ctrlnoLPS_pvalue	MIF-mediated Glucocorticoid Regulation
761	0.926722833	NA	203	28	4h_DINCH_100nM_ctrlnoLPS	4h_ctrlnoLPS_pvalue	Mismatch Repair in Eukaryotes
762	3.876289139	NA	169	28	4h_DINCH_100nM_ctrlnoLPS	4h_ctrlnoLPS_pvalue	Mitochondrial Dysfunction
763	0.377361379	NA	161	28	4h_DINCH_100nM_ctrlnoLPS	4h_ctrlnoLPS_pvalue	Mitochondrial L-carnitine Shuttle Pathway
764	0.451569826	NA	103	28	4h_DINCH_100nM_ctrlnoLPS	4h_ctrlnoLPS_pvalue	Mitotic Roles of Polo-Like Kinase
765	0.39515901	0.447	55	26	4h_DINCH_100nM_ctrlnoLPS	4h_ctrlnoLPS_pvalue	mTOR Signaling
766	0.743648629	NA	80	28	4h_DINCH_100nM_ctrlnoLPS	4h_ctrlnoLPS_pvalue	Myo-inositol Biosynthesis
767	0.506050981	-0.258	74	12	4h_DINCH_100nM_ctrlnoLPS	4h_ctrlnoLPS_pvalue	Natural Killer Cell Signaling
768	0.998426009	-0.5	86	25	4h_DINCH_100nM_ctrlnoLPS	4h_ctrlnoLPS_pvalue	Necroptosis Signaling Pathway
769	0.94325927	-0.302	142	20	4h_DINCH_100nM_ctrlnoLPS	4h_ctrlnoLPS_pvalue	NER Pathway
770	0.156006832	NA	217	28	4h_DINCH_100nM_ctrlnoLPS	4h_ctrlnoLPS_pvalue	Netrin Signaling
771	0.924455898	0.816	65	23	4h_DINCH_100nM_ctrlnoLPS	4h_ctrlnoLPS_pvalue	Neuregulin Signaling
772	0.211653426	NA	215	28	4h_DINCH_100nM_ctrlnoLPS	4h_ctrlnoLPS_pvalue	nNOS Signaling in Neurons
773	3.075130014	-1.155	6	12	4h_DINCH_100nM_ctrlnoLPS	4h_ctrlnoLPS_pvalue	NRF2-mediated Oxidative Stress Response
774	0.49447358	0.447	288	26	4h_DINCH_100nM_ctrlnoLPS	4h_ctrlnoLPS_pvalue	Oncostatin M Signaling
775	0.462487624	-2.183	88	4	4h_DINCH_100nM_ctrlnoLPS	4h_ctrlnoLPS_pvalue	Opioid Signaling Pathway
776	0.161370363	NA	112	28	4h_DINCH_100nM_ctrlnoLPS	4h_ctrlnoLPS_pvalue	Oxidative Ethanol Degradation III
777	1.994231397	3.357	13	1	4h_DINCH_100nM_ctrlnoLPS	4h_ctrlnoLPS_pvalue	Oxidative Phosphorylation
778	0.938427464	NA	179	28	4h_DINCH_100nM_ctrlnoLPS	4h_ctrlnoLPS_pvalue	Oxidized GTP and dGTP Detoxification
779	0.422424515	-0.632	277	27	4h_DINCH_100nM_ctrlnoLPS	4h_ctrlnoLPS_pvalue	P2Y Purigenic Receptor Signaling Pathway
780	0.534145294	0	51	23	4h_DINCH_100nM_ctrlnoLPS	4h_ctrlnoLPS_pvalue	p70S6K Signaling
781	0.275885204	-0.816	14	14	4h_DINCH_100nM_ctrlnoLPS	4h_ctrlnoLPS_pvalue	PAK Signaling
782	0.789550865	-0.333	9	13	4h_DINCH_100nM_ctrlnoLPS	4h_ctrlnoLPS_pvalue	Paxillin Signaling
783	1.418049678	0	241	20	4h_DINCH_100nM_ctrlnoLPS	4h_ctrlnoLPS_pvalue	Pentose Phosphate Pathway
784	0.301654396	NA	194	28	4h_DINCH_100nM_ctrlnoLPS	4h_ctrlnoLPS_pvalue	Pentose Phosphate Pathway (Non-oxidative Branch)
785	1.721301919	NA	205	28	4h_DINCH_100nM_ctrlnoLPS	4h_ctrlnoLPS_pvalue	Pentose Phosphate Pathway (Oxidative Branch)
786	0.462487624	-2	256	27	4h_DINCH_100nM_ctrlnoLPS	4h_ctrlnoLPS_pvalue	PFKFB4 Signaling Pathway
787	0.422424515	NA	168	28	4h_DINCH_100nM_ctrlnoLPS	4h_ctrlnoLPS_pvalue	Phagosome Formation
788	1.622760285	NA	189	28	4h_DINCH_100nM_ctrlnoLPS	4h_ctrlnoLPS_pvalue	Phagosome Maturation
789	1.178716445	0	100	28	4h_DINCH_100nM_ctrlnoLPS	4h_ctrlnoLPS_pvalue	Phenylalanine Degradation IV (Mammalian, via Side Chain)
790	0.447259525	-1.604	292	27	4h_DINCH_100nM_ctrlnoLPS	4h_ctrlnoLPS_pvalue	Phospholipase C Signaling
791	0.462487624	-0.302	249	23	4h_DINCH_100nM_ctrlnoLPS	4h_ctrlnoLPS_pvalue	PI3K Signaling in B Lymphocytes
792	0.360750846	-1.732	61	6	4h_DINCH_100nM_ctrlnoLPS	4h_ctrlnoLPS_pvalue	PI3K/AKT Signaling
793	0.252804631	-0.333	181	23	4h_DINCH_100nM_ctrlnoLPS	4h_ctrlnoLPS_pvalue	PKC? Signaling in T Lymphocytes
794	0.301654396	0.378	135	17	4h_DINCH_100nM_ctrlnoLPS	4h_ctrlnoLPS_pvalue	PPAR Signaling
795	0.926722833	0	289	18	4h_DINCH_100nM_ctrlnoLPS	4h_ctrlnoLPS_pvalue	PPAR?/RXR? Activation
796	0.177828459	NA	122	28	4h_DINCH_100nM_ctrlnoLPS	4h_ctrlnoLPS_pvalue	Pregnenolone Biosynthesis
797	0.75909089	0	261	28	4h_DINCH_100nM_ctrlnoLPS	4h_ctrlnoLPS_pvalue	Production of Nitric Oxide and Reactive Oxygen Species in Macrophages
798	0.301654396	0.447	46	26	4h_DINCH_100nM_ctrlnoLPS	4h_ctrlnoLPS_pvalue	Prolactin Signaling
799	0.360750846	NA	197	28	4h_DINCH_100nM_ctrlnoLPS	4h_ctrlnoLPS_pvalue	Prostate Cancer Signaling
800	0.94325927	-1.633	62	6	4h_DINCH_100nM_ctrlnoLPS	4h_ctrlnoLPS_pvalue	Protein Kinase A Signaling
801	7.021946187	NA	138	28	4h_DINCH_100nM_ctrlnoLPS	4h_ctrlnoLPS_pvalue	Protein Ubiquitination Pathway
802	0.431960122	1.265	25	10	4h_DINCH_100nM_ctrlnoLPS	4h_ctrlnoLPS_pvalue	PTEN Signaling
803	0.798389112	NA	236	29	4h_DINCH_100nM_ctrlnoLPS	4h_ctrlnoLPS_pvalue	Purine Nucleotides De Novo Biosynthesis II
804	0.301654396	NA	141	28	4h_DINCH_100nM_ctrlnoLPS	4h_ctrlnoLPS_pvalue	Purine Ribonucleosides Degradation to Ribose-1-phosphate
805	0.75909089	1	223	28	4h_DINCH_100nM_ctrlnoLPS	4h_ctrlnoLPS_pvalue	Pyrimidine Deoxyribonucleotides De Novo Biosynthesis I
806	0.50962333	0.447	257	29	4h_DINCH_100nM_ctrlnoLPS	4h_ctrlnoLPS_pvalue	Pyrimidine Ribonucleotides De Novo Biosynthesis
807	0.367935902	NA	127	28	4h_DINCH_100nM_ctrlnoLPS	4h_ctrlnoLPS_pvalue	Pyruvate Fermentation to Lactate
808	0.863285444	-0.577	49	14	4h_DINCH_100nM_ctrlnoLPS	4h_ctrlnoLPS_pvalue	Rac Signaling
809	0.34861395	NA	224	25	4h_DINCH_100nM_ctrlnoLPS	4h_ctrlnoLPS_pvalue	RAN Signaling
810	0.261043348	0	231	28	4h_DINCH_100nM_ctrlnoLPS	4h_ctrlnoLPS_pvalue	RANK Signaling in Osteoclasts
811	0.841135812	NA	151	28	4h_DINCH_100nM_ctrlnoLPS	4h_ctrlnoLPS_pvalue	Rapoport-Luebering Glycolytic Shunt
812	0.998024414	-1.508	77	13	4h_DINCH_100nM_ctrlnoLPS	4h_ctrlnoLPS_pvalue	Reelin Signaling in Neurons
813	0.789550865	-0.707	32	16	4h_DINCH_100nM_ctrlnoLPS	4h_ctrlnoLPS_pvalue	Regulation of Actin-based Motility by Rho
814	1.418049678	0	34	23	4h_DINCH_100nM_ctrlnoLPS	4h_ctrlnoLPS_pvalue	Regulation of Cellular Mechanics by Calpain Protease
815	2.202745705	0	268	23	4h_DINCH_100nM_ctrlnoLPS	4h_ctrlnoLPS_pvalue	Regulation of eIF4 and p70S6K Signaling
816	0.462487624	NA	105	28	4h_DINCH_100nM_ctrlnoLPS	4h_ctrlnoLPS_pvalue	Regulation of IL-2 Expression in Activated and Anergic T Lymphocytes
817	0.998024414	0	263	26	4h_DINCH_100nM_ctrlnoLPS	4h_ctrlnoLPS_pvalue	Remodeling of Epithelial Adherens Junctions
818	0.233042844	NA	97	12	4h_DINCH_100nM_ctrlnoLPS	4h_ctrlnoLPS_pvalue	Renal Cell Carcinoma Signaling
819	0.395656643	0	70	14	4h_DINCH_100nM_ctrlnoLPS	4h_ctrlnoLPS_pvalue	Renin-Angiotensin Signaling
820	0.244344322	-1.89	11	13	4h_DINCH_100nM_ctrlnoLPS	4h_ctrlnoLPS_pvalue	RhoA Signaling
821	0.50962333	0.632	134	22	4h_DINCH_100nM_ctrlnoLPS	4h_ctrlnoLPS_pvalue	RhoGDI Signaling
822	0.75909089	NA	199	28	4h_DINCH_100nM_ctrlnoLPS	4h_ctrlnoLPS_pvalue	Role of IL-17A in Psoriasis
823	0.370409313	0	225	29	4h_DINCH_100nM_ctrlnoLPS	4h_ctrlnoLPS_pvalue	Role of IL-17F in Allergic Inflammatory Airway Diseases
824	0.676304064	NA	124	28	4h_DINCH_100nM_ctrlnoLPS	4h_ctrlnoLPS_pvalue	Role of JAK1, JAK2 and TYK2 in Interferon Signaling
825	0.380125645	-0.832	137	12	4h_DINCH_100nM_ctrlnoLPS	4h_ctrlnoLPS_pvalue	Role of NFAT in Cardiac Hypertrophy
826	0.414246063	-1.155	265	27	4h_DINCH_100nM_ctrlnoLPS	4h_ctrlnoLPS_pvalue	Role of NFAT in Regulation of the Immune Response
827	0.75909089	-1.342	258	27	4h_DINCH_100nM_ctrlnoLPS	4h_ctrlnoLPS_pvalue	Role of PI3K/AKT Signaling in the Pathogenesis of Influenza
828	0.63817889	2.714	22	3	4h_DINCH_100nM_ctrlnoLPS	4h_ctrlnoLPS_pvalue	Role of PKR in Interferon Induction and Antiviral Response
829	0.286802647	NA	230	29	4h_DINCH_100nM_ctrlnoLPS	4h_ctrlnoLPS_pvalue	Role of RIG1-like Receptors in Antiviral Innate Immunity
830	0.31936529	NA	158	28	4h_DINCH_100nM_ctrlnoLPS	4h_ctrlnoLPS_pvalue	Role of Tissue Factor in Cancer
831	1.180862334	NA	121	28	4h_DINCH_100nM_ctrlnoLPS	4h_ctrlnoLPS_pvalue	S-adenosyl-L-methionine Biosynthesis
832	0.658416847	NA	123	28	4h_DINCH_100nM_ctrlnoLPS	4h_ctrlnoLPS_pvalue	Selenocysteine Biosynthesis II (Archaea and Eukaryotes)
833	0.863285444	1.732	7	10	4h_DINCH_100nM_ctrlnoLPS	4h_ctrlnoLPS_pvalue	Semaphorin Neuronal Repulsive Signaling Pathway
834	0.572698485	NA	131	28	4h_DINCH_100nM_ctrlnoLPS	4h_ctrlnoLPS_pvalue	Semaphorin Signaling in Neurons
835	0.31936529	-1	120	18	4h_DINCH_100nM_ctrlnoLPS	4h_ctrlnoLPS_pvalue	Senescence Pathway
836	0.841135812	NA	94	28	4h_DINCH_100nM_ctrlnoLPS	4h_ctrlnoLPS_pvalue	Serine Biosynthesis
837	0.447259525	NA	125	28	4h_DINCH_100nM_ctrlnoLPS	4h_ctrlnoLPS_pvalue	Sertoli Cell-Sertoli Cell Junction Signaling
838	0.628212114	-1.807	119	13	4h_DINCH_100nM_ctrlnoLPS	4h_ctrlnoLPS_pvalue	Signaling by Rho Family GTPases
839	7.021946187	-1.095	36	4	4h_DINCH_100nM_ctrlnoLPS	4h_ctrlnoLPS_pvalue	Sirtuin Signaling Pathway
840	0.252804631	-0.447	259	28	4h_DINCH_100nM_ctrlnoLPS	4h_ctrlnoLPS_pvalue	Sphingosine-1-phosphate Signaling
841	1.176595374	-2.828	18	2	4h_DINCH_100nM_ctrlnoLPS	4h_ctrlnoLPS_pvalue	Spliceosomal Cycle
842	0.370409313	1	232	28	4h_DINCH_100nM_ctrlnoLPS	4h_ctrlnoLPS_pvalue	Stearate Biosynthesis I (Animals)
843	0.525840136	NA	244	29	4h_DINCH_100nM_ctrlnoLPS	4h_ctrlnoLPS_pvalue	Sucrose Degradation V (Mammalian)
844	0.572698485	NA	187	28	4h_DINCH_100nM_ctrlnoLPS	4h_ctrlnoLPS_pvalue	Sulfate Activation for Sulfonation
845	0.96714389	1	296	20	4h_DINCH_100nM_ctrlnoLPS	4h_ctrlnoLPS_pvalue	Sumoylation Pathway
846	1.775133779	1	245	26	4h_DINCH_100nM_ctrlnoLPS	4h_ctrlnoLPS_pvalue	Superoxide Radicals Degradation
847	0.841135812	0	246	25	4h_DINCH_100nM_ctrlnoLPS	4h_ctrlnoLPS_pvalue	Superpathway of Cholesterol Biosynthesis
848	0.442568362	NA	234	28	4h_DINCH_100nM_ctrlnoLPS	4h_ctrlnoLPS_pvalue	Superpathway of Citrulline Metabolism
849	0.901098743	NA	238	19	4h_DINCH_100nM_ctrlnoLPS	4h_ctrlnoLPS_pvalue	Superpathway of Geranylgeranyldiphosphate Biosynthesis I (via Mevalonate)
850	0.525840136	1.807	3	11	4h_DINCH_100nM_ctrlnoLPS	4h_ctrlnoLPS_pvalue	Superpathway of Inositol Phosphate Compounds
851	0.989377081	-1.633	27	15	4h_DINCH_100nM_ctrlnoLPS	4h_ctrlnoLPS_pvalue	Superpathway of Methionine Degradation
852	1.180862334	NA	235	23	4h_DINCH_100nM_ctrlnoLPS	4h_ctrlnoLPS_pvalue	Superpathway of Serine and Glycine Biosynthesis I
853	0.28395767	-1.414	4	7	4h_DINCH_100nM_ctrlnoLPS	4h_ctrlnoLPS_pvalue	Synaptic Long Term Potentiation
854	0.40673049	-0.728	12	12	4h_DINCH_100nM_ctrlnoLPS	4h_ctrlnoLPS_pvalue	Synaptogenesis Signaling Pathway
855	0.170252987	-0.535	54	19	4h_DINCH_100nM_ctrlnoLPS	4h_ctrlnoLPS_pvalue	Systemic Lupus Erythematosus In B Cell Signaling Pathway
856	0	-0.302	276	26	4h_DINCH_100nM_ctrlnoLPS	4h_ctrlnoLPS_pvalue	Systemic Lupus Erythematosus In T Cell Signaling Pathway
857	0.798374673	NA	126	28	4h_DINCH_100nM_ctrlnoLPS	4h_ctrlnoLPS_pvalue	Systemic Lupus Erythematosus Signaling
858	0.258326007	NA	47	28	4h_DINCH_100nM_ctrlnoLPS	4h_ctrlnoLPS_pvalue	T Cell Receptor Signaling
859	0.462487624	NA	28	14	4h_DINCH_100nM_ctrlnoLPS	4h_ctrlnoLPS_pvalue	TCA Cycle II (Eukaryotic)
860	0.822949031	0	8	11	4h_DINCH_100nM_ctrlnoLPS	4h_ctrlnoLPS_pvalue	Tec Kinase Signaling
861	0.280349161	-1	285	27	4h_DINCH_100nM_ctrlnoLPS	4h_ctrlnoLPS_pvalue	Telomerase Signaling
862	0.608948617	NA	196	28	4h_DINCH_100nM_ctrlnoLPS	4h_ctrlnoLPS_pvalue	Telomere Extension by Telomerase
863	0.321514465	NA	175	28	4h_DINCH_100nM_ctrlnoLPS	4h_ctrlnoLPS_pvalue	Tetrahydrofolate Salvage from 5,10-methenyltetrahydrofolate
864	0.49965862	-0.577	82	12	4h_DINCH_100nM_ctrlnoLPS	4h_ctrlnoLPS_pvalue	Thrombin Signaling
865	0.3150462	0.447	41	26	4h_DINCH_100nM_ctrlnoLPS	4h_ctrlnoLPS_pvalue	Thrombopoietin Signaling
866	0.572698485	NA	148	28	4h_DINCH_100nM_ctrlnoLPS	4h_ctrlnoLPS_pvalue	Thyroid Hormone Biosynthesis
867	0.323403002	NA	118	28	4h_DINCH_100nM_ctrlnoLPS	4h_ctrlnoLPS_pvalue	Tight Junction Signaling
868	0.737568433	1.414	5	11	4h_DINCH_100nM_ctrlnoLPS	4h_ctrlnoLPS_pvalue	TREM1 Signaling
869	2.129798776	-1.667	68	4	4h_DINCH_100nM_ctrlnoLPS	4h_ctrlnoLPS_pvalue	tRNA Charging
870	0.950424629	0	284	29	4h_DINCH_100nM_ctrlnoLPS	4h_ctrlnoLPS_pvalue	Tryptophan Degradation III (Eukaryotic)
871	0.658416847	NA	90	28	4h_DINCH_100nM_ctrlnoLPS	4h_ctrlnoLPS_pvalue	Tryptophan Degradation to 2-amino-3-carboxymuconate Semialdehyde
872	0.151573484	NA	136	28	4h_DINCH_100nM_ctrlnoLPS	4h_ctrlnoLPS_pvalue	Ubiquinol-10 Biosynthesis (Eukaryotic)
873	0.658416847	NA	79	28	4h_DINCH_100nM_ctrlnoLPS	4h_ctrlnoLPS_pvalue	UDP-N-acetyl-D-glucosamine Biosynthesis II
874	0.926722833	-1.134	33	6	4h_DINCH_100nM_ctrlnoLPS	4h_ctrlnoLPS_pvalue	Unfolded protein response
875	0.321514465	NA	98	28	4h_DINCH_100nM_ctrlnoLPS	4h_ctrlnoLPS_pvalue	Urea Cycle
876	0.462487624	NA	91	28	4h_DINCH_100nM_ctrlnoLPS	4h_ctrlnoLPS_pvalue	Uridine-5'-phosphate Biosynthesis
877	0.407826091	0.447	281	23	4h_DINCH_100nM_ctrlnoLPS	4h_ctrlnoLPS_pvalue	UVA-Induced MAPK Signaling
878	0.301654396	NA	242	25	4h_DINCH_100nM_ctrlnoLPS	4h_ctrlnoLPS_pvalue	Valine Degradation I
879	0.688173862	-0.378	63	12	4h_DINCH_100nM_ctrlnoLPS	4h_ctrlnoLPS_pvalue	VEGF Signaling
880	2.314602057	NA	157	28	4h_DINCH_100nM_ctrlnoLPS	4h_ctrlnoLPS_pvalue	Virus Entry via Endocytic Pathways
881	0.462487624	NA	146	28	4h_DINCH_100nM_ctrlnoLPS	4h_ctrlnoLPS_pvalue	Vitamin-C Transport
882	0.688173862	0.378	240	28	4h_DINCH_100nM_ctrlnoLPS	4h_ctrlnoLPS_pvalue	Wnt/Ca+ pathway
883	0	NA	167	28	4h_DINCH_100nM_ctrlnoLPS	4h_ctrlnoLPS_pvalue	Xanthine and Xanthosine Salvage
884	0.863285444	0.333	50	22	4h_DINCH_100nM_ctrlnoLPS	4h_ctrlnoLPS_pvalue	Xenobiotic Metabolism AHR Signaling Pathway
885	0	-0.378	159	18	4h_DINCH_100nM_ctrlnoLPS	4h_ctrlnoLPS_pvalue	Xenobiotic Metabolism CAR Signaling Pathway
886	0.360750846	0.302	78	11	4h_DINCH_100nM_ctrlnoLPS	4h_ctrlnoLPS_pvalue	Xenobiotic Metabolism PXR Signaling Pathway
887	0.384047809	NA	37	28	4h_DINCH_100nM_ctrlnoLPS	4h_ctrlnoLPS_pvalue	Xenobiotic Metabolism Signaling
888	0.301654396	NA	198	28	4h_DINCH_100nM_ctrlnoLPS	4h_ctrlnoLPS_pvalue	Zymosterol Biosynthesis
889	1.104352506	0.333	35	12	4h_DINCH_1000nM_ctrlnoLPS	4h_ctrlnoLPS_pvalue	?-Adrenergic Signaling
890	1.246594405	NA	164	28	4h_DINCH_1000nM_ctrlnoLPS	4h_ctrlnoLPS_pvalue	?-glutamyl Cycle
891	0.520872623	NA	221	29	4h_DINCH_1000nM_ctrlnoLPS	4h_ctrlnoLPS_pvalue	?-linolenate Biosynthesis II (Animals)
892	1.633126193	-0.632	26	7	4h_DINCH_1000nM_ctrlnoLPS	4h_ctrlnoLPS_pvalue	14-3-3-mediated Signaling
893	0.487039712	NA	211	28	4h_DINCH_1000nM_ctrlnoLPS	4h_ctrlnoLPS_pvalue	2-ketoglutarate Dehydrogenase Complex
894	0.845929268	1.387	57	11	4h_DINCH_1000nM_ctrlnoLPS	4h_ctrlnoLPS_pvalue	3-phosphoinositide Biosynthesis
895	1.013687893	-0.447	219	28	4h_DINCH_1000nM_ctrlnoLPS	4h_ctrlnoLPS_pvalue	4-1BB Signaling in T Lymphocytes
896	0.402402907	NA	110	28	4h_DINCH_1000nM_ctrlnoLPS	4h_ctrlnoLPS_pvalue	Acetyl-CoA Biosynthesis I (Pyruvate Dehydrogenase Complex)
897	0	NA	108	28	4h_DINCH_1000nM_ctrlnoLPS	4h_ctrlnoLPS_pvalue	Acetyl-CoA Biosynthesis III (from Citrate)
898	1.583781606	1.606	58	16	4h_DINCH_1000nM_ctrlnoLPS	4h_ctrlnoLPS_pvalue	Actin Cytoskeleton Signaling
899	1.323703913	0.707	81	13	4h_DINCH_1000nM_ctrlnoLPS	4h_ctrlnoLPS_pvalue	Actin Nucleation by ARP-WASP Complex
900	1.323703913	0.707	21	11	4h_DINCH_1000nM_ctrlnoLPS	4h_ctrlnoLPS_pvalue	Activation of IRF by Cytosolic Pattern Recognition Receptors
901	0.952018995	0	267	23	4h_DINCH_1000nM_ctrlnoLPS	4h_ctrlnoLPS_pvalue	Acute Myeloid Leukemia Signaling
902	0.638153588	NA	180	28	4h_DINCH_1000nM_ctrlnoLPS	4h_ctrlnoLPS_pvalue	Adenine and Adenosine Salvage I
903	0.929050148	NA	117	28	4h_DINCH_1000nM_ctrlnoLPS	4h_ctrlnoLPS_pvalue	Adenine and Adenosine Salvage III
904	0	NA	165	28	4h_DINCH_1000nM_ctrlnoLPS	4h_ctrlnoLPS_pvalue	Adenine and Adenosine Salvage VI
905	0.596384942	NA	56	28	4h_DINCH_1000nM_ctrlnoLPS	4h_ctrlnoLPS_pvalue	Agranulocyte Adhesion and Diapedesis
906	0.991113405	0.707	84	13	4h_DINCH_1000nM_ctrlnoLPS	4h_ctrlnoLPS_pvalue	Agrin Interactions at Neuromuscular Junction
907	0.794624342	0.816	233	28	4h_DINCH_1000nM_ctrlnoLPS	4h_ctrlnoLPS_pvalue	Aldosterone Signaling in Epithelial Cells
908	0.450914761	2	64	24	4h_DINCH_1000nM_ctrlnoLPS	4h_ctrlnoLPS_pvalue	Amyloid Processing
909	1.013687893	0	286	20	4h_DINCH_1000nM_ctrlnoLPS	4h_ctrlnoLPS_pvalue	Angiopoietin Signaling
910	0.892730112	NA	72	28	4h_DINCH_1000nM_ctrlnoLPS	4h_ctrlnoLPS_pvalue	Antigen Presentation Pathway
911	0.828983797	-0.378	270	27	4h_DINCH_1000nM_ctrlnoLPS	4h_ctrlnoLPS_pvalue	Antioxidant Action of Vitamin C
912	0.538563268	0	279	27	4h_DINCH_1000nM_ctrlnoLPS	4h_ctrlnoLPS_pvalue	Antiproliferative Role of Somatostatin Receptor 2
913	0.701799291	0.378	280	26	4h_DINCH_1000nM_ctrlnoLPS	4h_ctrlnoLPS_pvalue	Apelin Adipocyte Signaling Pathway
914	0.538563268	0.378	278	20	4h_DINCH_1000nM_ctrlnoLPS	4h_ctrlnoLPS_pvalue	Apelin Cardiomyocyte Signaling Pathway
915	0.960881258	-0.302	287	27	4h_DINCH_1000nM_ctrlnoLPS	4h_ctrlnoLPS_pvalue	Apelin Endothelial Signaling Pathway
916	2.595837122	0.775	293	28	4h_DINCH_1000nM_ctrlnoLPS	4h_ctrlnoLPS_pvalue	Apoptosis Signaling
917	0.439789443	NA	85	28	4h_DINCH_1000nM_ctrlnoLPS	4h_ctrlnoLPS_pvalue	Arginine Biosynthesis IV
918	0.487039712	NA	101	28	4h_DINCH_1000nM_ctrlnoLPS	4h_ctrlnoLPS_pvalue	Arsenate Detoxification I (Glutaredoxin)
919	1.114016851	0	253	28	4h_DINCH_1000nM_ctrlnoLPS	4h_ctrlnoLPS_pvalue	Aryl Hydrocarbon Receptor Signaling
920	0	NA	207	28	4h_DINCH_1000nM_ctrlnoLPS	4h_ctrlnoLPS_pvalue	Asparagine Biosynthesis I
921	0.538563268	NA	195	28	4h_DINCH_1000nM_ctrlnoLPS	4h_ctrlnoLPS_pvalue	Aspartate Biosynthesis
922	0.929050148	NA	128	28	4h_DINCH_1000nM_ctrlnoLPS	4h_ctrlnoLPS_pvalue	Aspartate Degradation II
923	0.856850971	NA	149	28	4h_DINCH_1000nM_ctrlnoLPS	4h_ctrlnoLPS_pvalue	Atherosclerosis Signaling
924	0.639244886	-0.816	19	18	4h_DINCH_1000nM_ctrlnoLPS	4h_ctrlnoLPS_pvalue	ATM Signaling
925	2.284517412	NA	143	28	4h_DINCH_1000nM_ctrlnoLPS	4h_ctrlnoLPS_pvalue	Autophagy
926	1.081166263	NA	42	28	4h_DINCH_1000nM_ctrlnoLPS	4h_ctrlnoLPS_pvalue	Axonal Guidance Signaling
927	1.246594405	-0.5	177	12	4h_DINCH_1000nM_ctrlnoLPS	4h_ctrlnoLPS_pvalue	B Cell Receptor Signaling
928	1.938351117	-1.414	76	4	4h_DINCH_1000nM_ctrlnoLPS	4h_ctrlnoLPS_pvalue	BAG2 Signaling Pathway
929	0.569006676	NA	206	28	4h_DINCH_1000nM_ctrlnoLPS	4h_ctrlnoLPS_pvalue	BER pathway
930	0	NA	113	28	4h_DINCH_1000nM_ctrlnoLPS	4h_ctrlnoLPS_pvalue	Bile Acid Biosynthesis, Neutral Pathway
931	0.487039712	NA	144	28	4h_DINCH_1000nM_ctrlnoLPS	4h_ctrlnoLPS_pvalue	Branched-chain ?-keto acid Dehydrogenase Complex
932	0.955348424	0.378	243	28	4h_DINCH_1000nM_ctrlnoLPS	4h_ctrlnoLPS_pvalue	Calcium-induced T Lymphocyte Apoptosis
933	1.323703913	0.688	290	25	4h_DINCH_1000nM_ctrlnoLPS	4h_ctrlnoLPS_pvalue	Cardiac Hypertrophy Signaling
934	1.310890958	NA	204	28	4h_DINCH_1000nM_ctrlnoLPS	4h_ctrlnoLPS_pvalue	Caveolar-mediated Endocytosis Signaling
935	0.582980482	0.378	89	12	4h_DINCH_1000nM_ctrlnoLPS	4h_ctrlnoLPS_pvalue	CCR3 Signaling in Eosinophils
936	0.837972471	-0.816	260	27	4h_DINCH_1000nM_ctrlnoLPS	4h_ctrlnoLPS_pvalue	CD27 Signaling in Lymphocytes
937	1.633126193	0	182	27	4h_DINCH_1000nM_ctrlnoLPS	4h_ctrlnoLPS_pvalue	CD28 Signaling in T Helper Cells
938	0.856850971	0.378	251	29	4h_DINCH_1000nM_ctrlnoLPS	4h_ctrlnoLPS_pvalue	CD40 Signaling
939	1.835383877	0	73	13	4h_DINCH_1000nM_ctrlnoLPS	4h_ctrlnoLPS_pvalue	Cdc42 Signaling
940	0.952018995	0.333	59	12	4h_DINCH_1000nM_ctrlnoLPS	4h_ctrlnoLPS_pvalue	CDK5 Signaling
941	1.337848515	2.121	10	21	4h_DINCH_1000nM_ctrlnoLPS	4h_ctrlnoLPS_pvalue	Cell Cycle Control of Chromosomal Replication
942	0.639244886	NA	218	28	4h_DINCH_1000nM_ctrlnoLPS	4h_ctrlnoLPS_pvalue	Cell Cycle: G2/M DNA Damage Checkpoint Regulation
943	1.218156056	-0.632	291	27	4h_DINCH_1000nM_ctrlnoLPS	4h_ctrlnoLPS_pvalue	Ceramide Signaling
944	1.17507824	0.333	271	20	4h_DINCH_1000nM_ctrlnoLPS	4h_ctrlnoLPS_pvalue	Chemokine Signaling
945	1.001602255	1.265	163	26	4h_DINCH_1000nM_ctrlnoLPS	4h_ctrlnoLPS_pvalue	Cholecystokinin/Gastrin-mediated Signaling
946	0.218023894	NA	115	28	4h_DINCH_1000nM_ctrlnoLPS	4h_ctrlnoLPS_pvalue	Cholesterol Biosynthesis I
947	0.218023894	NA	176	28	4h_DINCH_1000nM_ctrlnoLPS	4h_ctrlnoLPS_pvalue	Cholesterol Biosynthesis II (via 24,25-dihydrolanosterol)
948	0.218023894	NA	95	28	4h_DINCH_1000nM_ctrlnoLPS	4h_ctrlnoLPS_pvalue	Cholesterol Biosynthesis III (via Desmosterol)
949	0.931851831	NA	145	28	4h_DINCH_1000nM_ctrlnoLPS	4h_ctrlnoLPS_pvalue	Chronic Myeloid Leukemia Signaling
950	0.439789443	NA	140	28	4h_DINCH_1000nM_ctrlnoLPS	4h_ctrlnoLPS_pvalue	Citrulline-Nitric Oxide Cycle
951	1.009604181	NA	130	28	4h_DINCH_1000nM_ctrlnoLPS	4h_ctrlnoLPS_pvalue	Citrulline Biosynthesis
952	1.976554647	NA	190	28	4h_DINCH_1000nM_ctrlnoLPS	4h_ctrlnoLPS_pvalue	Clathrin-mediated Endocytosis Signaling
953	2.961753567	-0.943	83	17	4h_DINCH_1000nM_ctrlnoLPS	4h_ctrlnoLPS_pvalue	Coronavirus Pathogenesis Pathway
954	0.487039712	NA	173	28	4h_DINCH_1000nM_ctrlnoLPS	4h_ctrlnoLPS_pvalue	Creatine-phosphate Biosynthesis
955	0.538563268	-0.632	75	7	4h_DINCH_1000nM_ctrlnoLPS	4h_ctrlnoLPS_pvalue	CREB Signaling in Neurons
956	0.567671066	NA	114	28	4h_DINCH_1000nM_ctrlnoLPS	4h_ctrlnoLPS_pvalue	CTLA4 Signaling in Cytotoxic T Lymphocytes
957	1.246594405	0.535	40	27	4h_DINCH_1000nM_ctrlnoLPS	4h_ctrlnoLPS_pvalue	CXCR4 Signaling
958	1.163304482	1.604	39	11	4h_DINCH_1000nM_ctrlnoLPS	4h_ctrlnoLPS_pvalue	D-myo-inositol-5-phosphate Metabolism
959	1.009604181	2	29	24	4h_DINCH_1000nM_ctrlnoLPS	4h_ctrlnoLPS_pvalue	D-myo-inositol (1,4,5)-Trisphosphate Biosynthesis
960	0.778548727	0.905	147	11	4h_DINCH_1000nM_ctrlnoLPS	4h_ctrlnoLPS_pvalue	D-myo-inositol (1,4,5,6)-Tetrakisphosphate Biosynthesis
961	0.778548727	0.905	133	11	4h_DINCH_1000nM_ctrlnoLPS	4h_ctrlnoLPS_pvalue	D-myo-inositol (3,4,5,6)-tetrakisphosphate Biosynthesis
962	1.152290868	0	255	28	4h_DINCH_1000nM_ctrlnoLPS	4h_ctrlnoLPS_pvalue	Death Receptor Signaling
963	2.045609472	NA	208	28	4h_DINCH_1000nM_ctrlnoLPS	4h_ctrlnoLPS_pvalue	DNA Double-Strand Break Repair by Non-Homologous End Joining
964	0.663590722	NA	226	20	4h_DINCH_1000nM_ctrlnoLPS	4h_ctrlnoLPS_pvalue	Dopamine Degradation
965	12.74252142	2.043	20	5	4h_DINCH_1000nM_ctrlnoLPS	4h_ctrlnoLPS_pvalue	EIF2 Signaling
966	0.611518162	-1	23	20	4h_DINCH_1000nM_ctrlnoLPS	4h_ctrlnoLPS_pvalue	Endocannabinoid Neuronal Synapse Pathway
967	0	NA	222	20	4h_DINCH_1000nM_ctrlnoLPS	4h_ctrlnoLPS_pvalue	Endoplasmic Reticulum Stress Pathway
968	0.402402907	0	184	20	4h_DINCH_1000nM_ctrlnoLPS	4h_ctrlnoLPS_pvalue	Ephrin B Signaling
969	0.866331073	0.277	1	7	4h_DINCH_1000nM_ctrlnoLPS	4h_ctrlnoLPS_pvalue	Ephrin Receptor Signaling
970	0.746405668	NA	192	28	4h_DINCH_1000nM_ctrlnoLPS	4h_ctrlnoLPS_pvalue	Epithelial Adherens Junction Signaling
971	0.867779943	1.155	31	19	4h_DINCH_1000nM_ctrlnoLPS	4h_ctrlnoLPS_pvalue	ERK/MAPK Signaling
972	1.368590954	NA	186	28	4h_DINCH_1000nM_ctrlnoLPS	4h_ctrlnoLPS_pvalue	Erythropoietin Signaling
973	1.310890958	0	229	28	4h_DINCH_1000nM_ctrlnoLPS	4h_ctrlnoLPS_pvalue	Estrogen-Dependent Breast Cancer Signaling
974	0.794971777	-2	295	22	4h_DINCH_1000nM_ctrlnoLPS	4h_ctrlnoLPS_pvalue	Estrogen Biosynthesis
975	1.246594405	0.2	273	26	4h_DINCH_1000nM_ctrlnoLPS	4h_ctrlnoLPS_pvalue	Estrogen Receptor Signaling
976	0.438067704	NA	227	20	4h_DINCH_1000nM_ctrlnoLPS	4h_ctrlnoLPS_pvalue	Ethanol Degradation IV
977	1.633126193	NA	154	28	4h_DINCH_1000nM_ctrlnoLPS	4h_ctrlnoLPS_pvalue	FAK Signaling
978	1.239372675	2	237	26	4h_DINCH_1000nM_ctrlnoLPS	4h_ctrlnoLPS_pvalue	FAT10 Signaling Pathway
979	1.1943432	0.447	247	26	4h_DINCH_1000nM_ctrlnoLPS	4h_ctrlnoLPS_pvalue	Fatty Acid ?-oxidation I
980	0.662823917	NA	104	28	4h_DINCH_1000nM_ctrlnoLPS	4h_ctrlnoLPS_pvalue	Fatty Acid Activation
981	0.487039712	1.134	53	16	4h_DINCH_1000nM_ctrlnoLPS	4h_ctrlnoLPS_pvalue	Fc? Receptor-mediated Phagocytosis in Macrophages and Monocytes
982	0.851858927	0.707	102	19	4h_DINCH_1000nM_ctrlnoLPS	4h_ctrlnoLPS_pvalue	FLT3 Signaling in Hematopoietic Progenitor Cells
983	2.702943444	-0.243	15	13	4h_DINCH_1000nM_ctrlnoLPS	4h_ctrlnoLPS_pvalue	fMLP Signaling in Neutrophils
984	1.009604181	NA	178	28	4h_DINCH_1000nM_ctrlnoLPS	4h_ctrlnoLPS_pvalue	Folate Polyglutamylation
985	0.232809556	-0.816	71	6	4h_DINCH_1000nM_ctrlnoLPS	4h_ctrlnoLPS_pvalue	G Beta Gamma Signaling
986	0.845929268	NA	109	28	4h_DINCH_1000nM_ctrlnoLPS	4h_ctrlnoLPS_pvalue	G Protein Signaling Mediated by Tubby
987	1.588267835	-0.258	262	28	4h_DINCH_1000nM_ctrlnoLPS	4h_ctrlnoLPS_pvalue	G?q Signaling
988	0	NA	201	28	4h_DINCH_1000nM_ctrlnoLPS	4h_ctrlnoLPS_pvalue	Galactose Degradation I (Leloir Pathway)
989	0.924831197	NA	209	28	4h_DINCH_1000nM_ctrlnoLPS	4h_ctrlnoLPS_pvalue	Gap Junction Signaling
990	0.526719085	0.447	254	23	4h_DINCH_1000nM_ctrlnoLPS	4h_ctrlnoLPS_pvalue	GDNF Family Ligand-Receptor Interactions
991	1.246594405	NA	213	28	4h_DINCH_1000nM_ctrlnoLPS	4h_ctrlnoLPS_pvalue	GDP-glucose Biosynthesis
992	1.880023675	NA	191	28	4h_DINCH_1000nM_ctrlnoLPS	4h_ctrlnoLPS_pvalue	Germ Cell-Sertoli Cell Junction Signaling
993	0.692518649	0.632	111	23	4h_DINCH_1000nM_ctrlnoLPS	4h_ctrlnoLPS_pvalue	Glioblastoma Multiforme Signaling
994	1.027499636	1.134	43	26	4h_DINCH_1000nM_ctrlnoLPS	4h_ctrlnoLPS_pvalue	Glioma Invasiveness Signaling
995	1.036490464	0	38	12	4h_DINCH_1000nM_ctrlnoLPS	4h_ctrlnoLPS_pvalue	Glioma Signaling
996	0.828983797	NA	188	28	4h_DINCH_1000nM_ctrlnoLPS	4h_ctrlnoLPS_pvalue	Glucocorticoid Receptor Signaling
997	3.529053209	1.414	2	9	4h_DINCH_1000nM_ctrlnoLPS	4h_ctrlnoLPS_pvalue	Gluconeogenesis I
998	1.246594405	NA	214	28	4h_DINCH_1000nM_ctrlnoLPS	4h_ctrlnoLPS_pvalue	Glucose and Glucose-1-phosphate Degradation
999	0.538563268	NA	212	28	4h_DINCH_1000nM_ctrlnoLPS	4h_ctrlnoLPS_pvalue	Glutamate Degradation II
1000	0.828983797	NA	66	28	4h_DINCH_1000nM_ctrlnoLPS	4h_ctrlnoLPS_pvalue	Glutamate Removal from Folates
1001	0.828983797	NA	185	28	4h_DINCH_1000nM_ctrlnoLPS	4h_ctrlnoLPS_pvalue	Glutamine Degradation I
1002	0.849668976	NA	266	13	4h_DINCH_1000nM_ctrlnoLPS	4h_ctrlnoLPS_pvalue	Glutaryl-CoA Degradation
1003	1.078934881	0	228	20	4h_DINCH_1000nM_ctrlnoLPS	4h_ctrlnoLPS_pvalue	Glutathione-mediated Detoxification
1004	1.114016851	1	155	11	4h_DINCH_1000nM_ctrlnoLPS	4h_ctrlnoLPS_pvalue	Glutathione Redox Reactions I
1005	0.487039712	NA	153	28	4h_DINCH_1000nM_ctrlnoLPS	4h_ctrlnoLPS_pvalue	Glutathione Redox Reactions II
1006	0.402402907	NA	210	28	4h_DINCH_1000nM_ctrlnoLPS	4h_ctrlnoLPS_pvalue	Glycine Cleavage Complex
1007	0.402402907	NA	171	28	4h_DINCH_1000nM_ctrlnoLPS	4h_ctrlnoLPS_pvalue	Glycogen Biosynthesis II (from UDP-D-Glucose)
1008	4.008411845	0.816	92	11	4h_DINCH_1000nM_ctrlnoLPS	4h_ctrlnoLPS_pvalue	Glycogen Degradation II
1009	3.461168022	0.816	45	11	4h_DINCH_1000nM_ctrlnoLPS	4h_ctrlnoLPS_pvalue	Glycogen Degradation III
1010	4.396110898	3	24	3	4h_DINCH_1000nM_ctrlnoLPS	4h_ctrlnoLPS_pvalue	Glycolysis I
1011	1.246594405	-0.378	16	12	4h_DINCH_1000nM_ctrlnoLPS	4h_ctrlnoLPS_pvalue	GM-CSF Signaling
1012	0.991113405	0	17	7	4h_DINCH_1000nM_ctrlnoLPS	4h_ctrlnoLPS_pvalue	GNRH Signaling
1013	0.491781856	-0.447	250	27	4h_DINCH_1000nM_ctrlnoLPS	4h_ctrlnoLPS_pvalue	GPCR-Mediated Integration of Enteroendocrine Signaling Exemplified by an L Cell
1014	1.323703913	NA	150	28	4h_DINCH_1000nM_ctrlnoLPS	4h_ctrlnoLPS_pvalue	Granzyme A Signaling
1015	0.849668976	NA	252	22	4h_DINCH_1000nM_ctrlnoLPS	4h_ctrlnoLPS_pvalue	Granzyme B Signaling
1016	1.57688538	NA	107	28	4h_DINCH_1000nM_ctrlnoLPS	4h_ctrlnoLPS_pvalue	Guanine and Guanosine Salvage I
1017	0.487039712	NA	129	28	4h_DINCH_1000nM_ctrlnoLPS	4h_ctrlnoLPS_pvalue	Heme Biosynthesis from Uroporphyrinogen-III I
1018	0	NA	99	28	4h_DINCH_1000nM_ctrlnoLPS	4h_ctrlnoLPS_pvalue	Heme Degradation
1019	1.246594405	1.886	30	9	4h_DINCH_1000nM_ctrlnoLPS	4h_ctrlnoLPS_pvalue	HIF1? Signaling
1020	0.444977805	1.633	44	10	4h_DINCH_1000nM_ctrlnoLPS	4h_ctrlnoLPS_pvalue	HIPPO signaling
1021	0.851858927	0.577	139	26	4h_DINCH_1000nM_ctrlnoLPS	4h_ctrlnoLPS_pvalue	HMGB1 Signaling
1022	1.219189696	0	294	22	4h_DINCH_1000nM_ctrlnoLPS	4h_ctrlnoLPS_pvalue	Huntington's Disease Signaling
1023	0.976031224	NA	162	28	4h_DINCH_1000nM_ctrlnoLPS	4h_ctrlnoLPS_pvalue	Hypoxia Signaling in the Cardiovascular System
1024	1.257343482	NA	116	28	4h_DINCH_1000nM_ctrlnoLPS	4h_ctrlnoLPS_pvalue	Hypusine Biosynthesis
1025	1.310890958	-0.302	283	27	4h_DINCH_1000nM_ctrlnoLPS	4h_ctrlnoLPS_pvalue	iCOS-iCOSL Signaling in T Helper Cells
1026	0.74288028	0	272	27	4h_DINCH_1000nM_ctrlnoLPS	4h_ctrlnoLPS_pvalue	IGF-1 Signaling
1027	1.15878443	NA	160	28	4h_DINCH_1000nM_ctrlnoLPS	4h_ctrlnoLPS_pvalue	IL-12 Signaling and Production in Macrophages
1028	1.156211014	0.333	269	26	4h_DINCH_1000nM_ctrlnoLPS	4h_ctrlnoLPS_pvalue	IL-15 Signaling
1029	1.991761409	0	282	23	4h_DINCH_1000nM_ctrlnoLPS	4h_ctrlnoLPS_pvalue	IL-3 Signaling
1030	0.596384942	NA	202	28	4h_DINCH_1000nM_ctrlnoLPS	4h_ctrlnoLPS_pvalue	IL-4 Signaling
1031	2.049805624	0	183	27	4h_DINCH_1000nM_ctrlnoLPS	4h_ctrlnoLPS_pvalue	IL-8 Signaling
1032	0.997486236	0.447	274	26	4h_DINCH_1000nM_ctrlnoLPS	4h_ctrlnoLPS_pvalue	IL-9 Signaling
1033	1.080217307	-0.832	69	13	4h_DINCH_1000nM_ctrlnoLPS	4h_ctrlnoLPS_pvalue	ILK Signaling
1034	1.078934881	0	239	28	4h_DINCH_1000nM_ctrlnoLPS	4h_ctrlnoLPS_pvalue	Inflammasome pathway
1035	0.538836566	-0.333	60	7	4h_DINCH_1000nM_ctrlnoLPS	4h_ctrlnoLPS_pvalue	Inhibition of ARE-Mediated mRNA Degradation Pathway
1036	0.538563268	NA	132	28	4h_DINCH_1000nM_ctrlnoLPS	4h_ctrlnoLPS_pvalue	Inosine-5'-phosphate Biosynthesis II
1037	2.581790575	0.626	152	23	4h_DINCH_1000nM_ctrlnoLPS	4h_ctrlnoLPS_pvalue	Insulin Secretion Signaling Pathway
1038	2.905321707	1.877	67	16	4h_DINCH_1000nM_ctrlnoLPS	4h_ctrlnoLPS_pvalue	Integrin Signaling
1039	0.952018995	2.236	52	8	4h_DINCH_1000nM_ctrlnoLPS	4h_ctrlnoLPS_pvalue	Interferon Signaling
1040	0.402975515	NA	156	28	4h_DINCH_1000nM_ctrlnoLPS	4h_ctrlnoLPS_pvalue	Iron homeostasis signaling pathway
1041	2.581790575	-0.447	96	25	4h_DINCH_1000nM_ctrlnoLPS	4h_ctrlnoLPS_pvalue	Isoleucine Degradation I
1042	1.612079306	0.302	275	26	4h_DINCH_1000nM_ctrlnoLPS	4h_ctrlnoLPS_pvalue	JAK/Stat Signaling
1043	1.665675147	NA	87	28	4h_DINCH_1000nM_ctrlnoLPS	4h_ctrlnoLPS_pvalue	Ketogenesis
1044	2.060524369	NA	193	28	4h_DINCH_1000nM_ctrlnoLPS	4h_ctrlnoLPS_pvalue	Ketolysis
1045	0.487039712	NA	48	28	4h_DINCH_1000nM_ctrlnoLPS	4h_ctrlnoLPS_pvalue	L-cysteine Degradation I
1046	1.246594405	NA	172	28	4h_DINCH_1000nM_ctrlnoLPS	4h_ctrlnoLPS_pvalue	Leucine Degradation I
1047	1.009604181	1.069	166	16	4h_DINCH_1000nM_ctrlnoLPS	4h_ctrlnoLPS_pvalue	Leukocyte Extravasation Signaling
1048	0.976031224	NA	106	28	4h_DINCH_1000nM_ctrlnoLPS	4h_ctrlnoLPS_pvalue	Lipid Antigen Presentation by CD1
1049	0.444977805	-0.447	248	20	4h_DINCH_1000nM_ctrlnoLPS	4h_ctrlnoLPS_pvalue	LPS/IL-1 Mediated Inhibition of RXR Function
1050	0.960881258	-0.707	93	18	4h_DINCH_1000nM_ctrlnoLPS	4h_ctrlnoLPS_pvalue	LXR/RXR Activation
1051	0.526719085	NA	264	23	4h_DINCH_1000nM_ctrlnoLPS	4h_ctrlnoLPS_pvalue	Macropinocytosis Signaling
1052	0	NA	174	28	4h_DINCH_1000nM_ctrlnoLPS	4h_ctrlnoLPS_pvalue	Mechanisms of Viral Exit from Host Cells
1053	0.845789642	0.378	170	27	4h_DINCH_1000nM_ctrlnoLPS	4h_ctrlnoLPS_pvalue	Melatonin Signaling
1054	0.520872623	NA	200	28	4h_DINCH_1000nM_ctrlnoLPS	4h_ctrlnoLPS_pvalue	Methylglyoxal Degradation III
1055	0.989479121	NA	216	28	4h_DINCH_1000nM_ctrlnoLPS	4h_ctrlnoLPS_pvalue	Mevalonate Pathway I
1056	0.462009033	NA	220	28	4h_DINCH_1000nM_ctrlnoLPS	4h_ctrlnoLPS_pvalue	MIF-mediated Glucocorticoid Regulation
1057	0.182728379	NA	203	28	4h_DINCH_1000nM_ctrlnoLPS	4h_ctrlnoLPS_pvalue	Mismatch Repair in Eukaryotes
1058	2.522737278	NA	169	28	4h_DINCH_1000nM_ctrlnoLPS	4h_ctrlnoLPS_pvalue	Mitochondrial Dysfunction
1059	0.520872623	NA	161	28	4h_DINCH_1000nM_ctrlnoLPS	4h_ctrlnoLPS_pvalue	Mitochondrial L-carnitine Shuttle Pathway
1060	0.487039712	NA	103	28	4h_DINCH_1000nM_ctrlnoLPS	4h_ctrlnoLPS_pvalue	Mitotic Roles of Polo-Like Kinase
1061	1.67799438	0.707	55	26	4h_DINCH_1000nM_ctrlnoLPS	4h_ctrlnoLPS_pvalue	mTOR Signaling
1062	0.439789443	NA	80	28	4h_DINCH_1000nM_ctrlnoLPS	4h_ctrlnoLPS_pvalue	Myo-inositol Biosynthesis
1063	1.009604181	-0.5	74	12	4h_DINCH_1000nM_ctrlnoLPS	4h_ctrlnoLPS_pvalue	Natural Killer Cell Signaling
1064	1.583781606	0.5	86	25	4h_DINCH_1000nM_ctrlnoLPS	4h_ctrlnoLPS_pvalue	Necroptosis Signaling Pathway
1065	0.960881258	0.378	142	20	4h_DINCH_1000nM_ctrlnoLPS	4h_ctrlnoLPS_pvalue	NER Pathway
1066	0.389440512	0	217	28	4h_DINCH_1000nM_ctrlnoLPS	4h_ctrlnoLPS_pvalue	Netrin Signaling
1067	0.866331073	1.414	65	23	4h_DINCH_1000nM_ctrlnoLPS	4h_ctrlnoLPS_pvalue	Neuregulin Signaling
1068	1.323703913	NA	215	28	4h_DINCH_1000nM_ctrlnoLPS	4h_ctrlnoLPS_pvalue	nNOS Signaling in Neurons
1069	2.228760018	-0.905	6	12	4h_DINCH_1000nM_ctrlnoLPS	4h_ctrlnoLPS_pvalue	NRF2-mediated Oxidative Stress Response
1070	1.343273143	1.134	288	26	4h_DINCH_1000nM_ctrlnoLPS	4h_ctrlnoLPS_pvalue	Oncostatin M Signaling
1071	0.928402218	-1.698	88	4	4h_DINCH_1000nM_ctrlnoLPS	4h_ctrlnoLPS_pvalue	Opioid Signaling Pathway
1072	0.210936323	NA	112	28	4h_DINCH_1000nM_ctrlnoLPS	4h_ctrlnoLPS_pvalue	Oxidative Ethanol Degradation III
1073	1.191156042	2.714	13	1	4h_DINCH_1000nM_ctrlnoLPS	4h_ctrlnoLPS_pvalue	Oxidative Phosphorylation
1074	0.538563268	NA	179	28	4h_DINCH_1000nM_ctrlnoLPS	4h_ctrlnoLPS_pvalue	Oxidized GTP and dGTP Detoxification
1075	1.027499636	0	277	27	4h_DINCH_1000nM_ctrlnoLPS	4h_ctrlnoLPS_pvalue	P2Y Purigenic Receptor Signaling Pathway
1076	1.822740312	0.577	51	23	4h_DINCH_1000nM_ctrlnoLPS	4h_ctrlnoLPS_pvalue	p70S6K Signaling
1077	0.978159798	1	14	14	4h_DINCH_1000nM_ctrlnoLPS	4h_ctrlnoLPS_pvalue	PAK Signaling
1078	0.538836566	0.378	9	13	4h_DINCH_1000nM_ctrlnoLPS	4h_ctrlnoLPS_pvalue	Paxillin Signaling
1079	1.159774667	NA	241	20	4h_DINCH_1000nM_ctrlnoLPS	4h_ctrlnoLPS_pvalue	Pentose Phosphate Pathway
1080	0.929050148	NA	194	28	4h_DINCH_1000nM_ctrlnoLPS	4h_ctrlnoLPS_pvalue	Pentose Phosphate Pathway (Non-oxidative Branch)
1081	0.487039712	NA	205	28	4h_DINCH_1000nM_ctrlnoLPS	4h_ctrlnoLPS_pvalue	Pentose Phosphate Pathway (Oxidative Branch)
1082	0.701799291	0	256	27	4h_DINCH_1000nM_ctrlnoLPS	4h_ctrlnoLPS_pvalue	PFKFB4 Signaling Pathway
1083	0.65905136	NA	168	28	4h_DINCH_1000nM_ctrlnoLPS	4h_ctrlnoLPS_pvalue	Phagosome Formation
1084	4.599987386	NA	189	28	4h_DINCH_1000nM_ctrlnoLPS	4h_ctrlnoLPS_pvalue	Phagosome Maturation
1085	1.026344596	NA	100	28	4h_DINCH_1000nM_ctrlnoLPS	4h_ctrlnoLPS_pvalue	Phenylalanine Degradation IV (Mammalian, via Side Chain)
1086	1.583781606	0	292	27	4h_DINCH_1000nM_ctrlnoLPS	4h_ctrlnoLPS_pvalue	Phospholipase C Signaling
1087	2.581790575	0	249	23	4h_DINCH_1000nM_ctrlnoLPS	4h_ctrlnoLPS_pvalue	PI3K Signaling in B Lymphocytes
1088	1.009604181	-1.604	61	6	4h_DINCH_1000nM_ctrlnoLPS	4h_ctrlnoLPS_pvalue	PI3K/AKT Signaling
1089	1.009604181	0.277	181	23	4h_DINCH_1000nM_ctrlnoLPS	4h_ctrlnoLPS_pvalue	PKC? Signaling in T Lymphocytes
1090	0.806902113	-0.333	135	17	4h_DINCH_1000nM_ctrlnoLPS	4h_ctrlnoLPS_pvalue	PPAR Signaling
1091	0.847193667	0.302	289	18	4h_DINCH_1000nM_ctrlnoLPS	4h_ctrlnoLPS_pvalue	PPAR?/RXR? Activation
1092	0.236897269	NA	122	28	4h_DINCH_1000nM_ctrlnoLPS	4h_ctrlnoLPS_pvalue	Pregnenolone Biosynthesis
1093	1.822740312	0	261	28	4h_DINCH_1000nM_ctrlnoLPS	4h_ctrlnoLPS_pvalue	Production of Nitric Oxide and Reactive Oxygen Species in Macrophages
1094	0.828983797	1.134	46	26	4h_DINCH_1000nM_ctrlnoLPS	4h_ctrlnoLPS_pvalue	Prolactin Signaling
1095	0.698826396	NA	197	28	4h_DINCH_1000nM_ctrlnoLPS	4h_ctrlnoLPS_pvalue	Prostate Cancer Signaling
1096	1.246594405	-1.46	62	6	4h_DINCH_1000nM_ctrlnoLPS	4h_ctrlnoLPS_pvalue	Protein Kinase A Signaling
1097	4.599987386	NA	138	28	4h_DINCH_1000nM_ctrlnoLPS	4h_ctrlnoLPS_pvalue	Protein Ubiquitination Pathway
1098	1.036490464	1.155	25	10	4h_DINCH_1000nM_ctrlnoLPS	4h_ctrlnoLPS_pvalue	PTEN Signaling
1099	1.081166263	NA	236	29	4h_DINCH_1000nM_ctrlnoLPS	4h_ctrlnoLPS_pvalue	Purine Nucleotides De Novo Biosynthesis II
1100	0.929050148	NA	141	28	4h_DINCH_1000nM_ctrlnoLPS	4h_ctrlnoLPS_pvalue	Purine Ribonucleosides Degradation to Ribose-1-phosphate
1101	0.663590722	NA	223	28	4h_DINCH_1000nM_ctrlnoLPS	4h_ctrlnoLPS_pvalue	Pyrimidine Deoxyribonucleotides De Novo Biosynthesis I
1102	0.525251692	0	257	29	4h_DINCH_1000nM_ctrlnoLPS	4h_ctrlnoLPS_pvalue	Pyrimidine Ribonucleotides De Novo Biosynthesis
1103	0.487039712	NA	127	28	4h_DINCH_1000nM_ctrlnoLPS	4h_ctrlnoLPS_pvalue	Pyruvate Fermentation to Lactate
1104	2.579365634	0.5	49	14	4h_DINCH_1000nM_ctrlnoLPS	4h_ctrlnoLPS_pvalue	Rac Signaling
1105	0.483834321	NA	224	25	4h_DINCH_1000nM_ctrlnoLPS	4h_ctrlnoLPS_pvalue	RAN Signaling
1106	0.952018995	-0.333	231	28	4h_DINCH_1000nM_ctrlnoLPS	4h_ctrlnoLPS_pvalue	RANK Signaling in Osteoclasts
1107	0.487039712	NA	151	28	4h_DINCH_1000nM_ctrlnoLPS	4h_ctrlnoLPS_pvalue	Rapoport-Luebering Glycolytic Shunt
1108	0.689737252	-0.333	77	13	4h_DINCH_1000nM_ctrlnoLPS	4h_ctrlnoLPS_pvalue	Reelin Signaling in Neurons
1109	1.717393647	1.897	32	16	4h_DINCH_1000nM_ctrlnoLPS	4h_ctrlnoLPS_pvalue	Regulation of Actin-based Motility by Rho
1110	1.872822333	0.378	34	23	4h_DINCH_1000nM_ctrlnoLPS	4h_ctrlnoLPS_pvalue	Regulation of Cellular Mechanics by Calpain Protease
1111	4.008411845	0	268	23	4h_DINCH_1000nM_ctrlnoLPS	4h_ctrlnoLPS_pvalue	Regulation of eIF4 and p70S6K Signaling
1112	1.368590954	NA	105	28	4h_DINCH_1000nM_ctrlnoLPS	4h_ctrlnoLPS_pvalue	Regulation of IL-2 Expression in Activated and Anergic T Lymphocytes
1113	2.729180581	1.342	263	26	4h_DINCH_1000nM_ctrlnoLPS	4h_ctrlnoLPS_pvalue	Remodeling of Epithelial Adherens Junctions
1114	0.689015162	0.447	97	12	4h_DINCH_1000nM_ctrlnoLPS	4h_ctrlnoLPS_pvalue	Renal Cell Carcinoma Signaling
1115	0.989479121	0.632	70	14	4h_DINCH_1000nM_ctrlnoLPS	4h_ctrlnoLPS_pvalue	Renin-Angiotensin Signaling
1116	0.867927023	0	11	13	4h_DINCH_1000nM_ctrlnoLPS	4h_ctrlnoLPS_pvalue	RhoA Signaling
1117	2.250940266	-1.5	134	22	4h_DINCH_1000nM_ctrlnoLPS	4h_ctrlnoLPS_pvalue	RhoGDI Signaling
1118	1.026344596	NA	199	28	4h_DINCH_1000nM_ctrlnoLPS	4h_ctrlnoLPS_pvalue	Role of IL-17A in Psoriasis
1119	1.078934881	0	225	29	4h_DINCH_1000nM_ctrlnoLPS	4h_ctrlnoLPS_pvalue	Role of IL-17F in Allergic Inflammatory Airway Diseases
1120	1.330351564	NA	124	28	4h_DINCH_1000nM_ctrlnoLPS	4h_ctrlnoLPS_pvalue	Role of JAK1, JAK2 and TYK2 in Interferon Signaling
1121	0.757396078	-0.258	137	12	4h_DINCH_1000nM_ctrlnoLPS	4h_ctrlnoLPS_pvalue	Role of NFAT in Cardiac Hypertrophy
1122	1.330351564	0	265	27	4h_DINCH_1000nM_ctrlnoLPS	4h_ctrlnoLPS_pvalue	Role of NFAT in Regulation of the Immune Response
1123	0.828983797	-0.816	258	27	4h_DINCH_1000nM_ctrlnoLPS	4h_ctrlnoLPS_pvalue	Role of PI3K/AKT Signaling in the Pathogenesis of Influenza
1124	0.805603981	1.897	22	3	4h_DINCH_1000nM_ctrlnoLPS	4h_ctrlnoLPS_pvalue	Role of PKR in Interferon Induction and Antiviral Response
1125	0.952018995	0.447	230	29	4h_DINCH_1000nM_ctrlnoLPS	4h_ctrlnoLPS_pvalue	Role of RIG1-like Receptors in Antiviral Innate Immunity
1126	0.350826652	NA	158	28	4h_DINCH_1000nM_ctrlnoLPS	4h_ctrlnoLPS_pvalue	Role of Tissue Factor in Cancer
1127	0	NA	121	28	4h_DINCH_1000nM_ctrlnoLPS	4h_ctrlnoLPS_pvalue	S-adenosyl-L-methionine Biosynthesis
1128	0.929050148	NA	123	28	4h_DINCH_1000nM_ctrlnoLPS	4h_ctrlnoLPS_pvalue	Selenocysteine Biosynthesis II (Archaea and Eukaryotes)
1129	1.027499636	2.111	7	10	4h_DINCH_1000nM_ctrlnoLPS	4h_ctrlnoLPS_pvalue	Semaphorin Neuronal Repulsive Signaling Pathway
1130	1.872822333	NA	131	28	4h_DINCH_1000nM_ctrlnoLPS	4h_ctrlnoLPS_pvalue	Semaphorin Signaling in Neurons
1131	0.888979186	-0.894	120	18	4h_DINCH_1000nM_ctrlnoLPS	4h_ctrlnoLPS_pvalue	Senescence Pathway
1132	1.104698754	NA	94	28	4h_DINCH_1000nM_ctrlnoLPS	4h_ctrlnoLPS_pvalue	Serine Biosynthesis
1133	0.560183522	NA	125	28	4h_DINCH_1000nM_ctrlnoLPS	4h_ctrlnoLPS_pvalue	Sertoli Cell-Sertoli Cell Junction Signaling
1134	3.342313667	0.209	119	13	4h_DINCH_1000nM_ctrlnoLPS	4h_ctrlnoLPS_pvalue	Signaling by Rho Family GTPases
1135	5.75102122	-1.671	36	4	4h_DINCH_1000nM_ctrlnoLPS	4h_ctrlnoLPS_pvalue	Sirtuin Signaling Pathway
1136	0.687197057	0.378	259	28	4h_DINCH_1000nM_ctrlnoLPS	4h_ctrlnoLPS_pvalue	Sphingosine-1-phosphate Signaling
1137	2.049805624	-3	18	2	4h_DINCH_1000nM_ctrlnoLPS	4h_ctrlnoLPS_pvalue	Spliceosomal Cycle
1138	0.323335652	NA	232	28	4h_DINCH_1000nM_ctrlnoLPS	4h_ctrlnoLPS_pvalue	Stearate Biosynthesis I (Animals)
1139	0.786843429	NA	244	29	4h_DINCH_1000nM_ctrlnoLPS	4h_ctrlnoLPS_pvalue	Sucrose Degradation V (Mammalian)
1140	0.828983797	NA	187	28	4h_DINCH_1000nM_ctrlnoLPS	4h_ctrlnoLPS_pvalue	Sulfate Activation for Sulfonation
1141	1.43521091	-0.707	296	20	4h_DINCH_1000nM_ctrlnoLPS	4h_ctrlnoLPS_pvalue	Sumoylation Pathway
1142	1.32050758	NA	245	26	4h_DINCH_1000nM_ctrlnoLPS	4h_ctrlnoLPS_pvalue	Superoxide Radicals Degradation
1143	0.828983797	NA	246	25	4h_DINCH_1000nM_ctrlnoLPS	4h_ctrlnoLPS_pvalue	Superpathway of Cholesterol Biosynthesis
1144	1.081166263	NA	234	28	4h_DINCH_1000nM_ctrlnoLPS	4h_ctrlnoLPS_pvalue	Superpathway of Citrulline Metabolism
1145	0.824054613	NA	238	19	4h_DINCH_1000nM_ctrlnoLPS	4h_ctrlnoLPS_pvalue	Superpathway of Geranylgeranyldiphosphate Biosynthesis I (via Mevalonate)
1146	1.239372675	1.698	3	11	4h_DINCH_1000nM_ctrlnoLPS	4h_ctrlnoLPS_pvalue	Superpathway of Inositol Phosphate Compounds
1147	1.036490464	-0.447	27	15	4h_DINCH_1000nM_ctrlnoLPS	4h_ctrlnoLPS_pvalue	Superpathway of Methionine Degradation
1148	1.588267835	NA	235	23	4h_DINCH_1000nM_ctrlnoLPS	4h_ctrlnoLPS_pvalue	Superpathway of Serine and Glycine Biosynthesis I
1149	0.929050148	-0.302	4	7	4h_DINCH_1000nM_ctrlnoLPS	4h_ctrlnoLPS_pvalue	Synaptic Long Term Potentiation
1150	0.487039712	0.535	12	12	4h_DINCH_1000nM_ctrlnoLPS	4h_ctrlnoLPS_pvalue	Synaptogenesis Signaling Pathway
1151	0.952018995	0.447	54	19	4h_DINCH_1000nM_ctrlnoLPS	4h_ctrlnoLPS_pvalue	Systemic Lupus Erythematosus In B Cell Signaling Pathway
1152	1.239372675	0.688	276	26	4h_DINCH_1000nM_ctrlnoLPS	4h_ctrlnoLPS_pvalue	Systemic Lupus Erythematosus In T Cell Signaling Pathway
1153	1.633126193	NA	126	28	4h_DINCH_1000nM_ctrlnoLPS	4h_ctrlnoLPS_pvalue	Systemic Lupus Erythematosus Signaling
1154	1.087565099	NA	47	28	4h_DINCH_1000nM_ctrlnoLPS	4h_ctrlnoLPS_pvalue	T Cell Receptor Signaling
1155	0.380580386	NA	28	14	4h_DINCH_1000nM_ctrlnoLPS	4h_ctrlnoLPS_pvalue	TCA Cycle II (Eukaryotic)
1156	1.666412576	0.535	8	11	4h_DINCH_1000nM_ctrlnoLPS	4h_ctrlnoLPS_pvalue	Tec Kinase Signaling
1157	0.421196268	-0.378	285	27	4h_DINCH_1000nM_ctrlnoLPS	4h_ctrlnoLPS_pvalue	Telomerase Signaling
1158	1.323703913	NA	196	28	4h_DINCH_1000nM_ctrlnoLPS	4h_ctrlnoLPS_pvalue	Telomere Extension by Telomerase
1159	1.009604181	NA	175	28	4h_DINCH_1000nM_ctrlnoLPS	4h_ctrlnoLPS_pvalue	Tetrahydrofolate Salvage from 5,10-methenyltetrahydrofolate
1160	1.83398353	-0.243	82	12	4h_DINCH_1000nM_ctrlnoLPS	4h_ctrlnoLPS_pvalue	Thrombin Signaling
1161	0.900300992	1.134	41	26	4h_DINCH_1000nM_ctrlnoLPS	4h_ctrlnoLPS_pvalue	Thrombopoietin Signaling
1162	0.828983797	NA	148	28	4h_DINCH_1000nM_ctrlnoLPS	4h_ctrlnoLPS_pvalue	Thyroid Hormone Biosynthesis
1163	0.39779808	NA	118	28	4h_DINCH_1000nM_ctrlnoLPS	4h_ctrlnoLPS_pvalue	Tight Junction Signaling
1164	1.323703913	1	5	11	4h_DINCH_1000nM_ctrlnoLPS	4h_ctrlnoLPS_pvalue	TREM1 Signaling
1165	3.895835078	-1.508	68	4	4h_DINCH_1000nM_ctrlnoLPS	4h_ctrlnoLPS_pvalue	tRNA Charging
1166	0.976031224	NA	284	29	4h_DINCH_1000nM_ctrlnoLPS	4h_ctrlnoLPS_pvalue	Tryptophan Degradation III (Eukaryotic)
1167	0.402402907	NA	90	28	4h_DINCH_1000nM_ctrlnoLPS	4h_ctrlnoLPS_pvalue	Tryptophan Degradation to 2-amino-3-carboxymuconate Semialdehyde
1168	0.196704262	NA	136	28	4h_DINCH_1000nM_ctrlnoLPS	4h_ctrlnoLPS_pvalue	Ubiquinol-10 Biosynthesis (Eukaryotic)
1169	1.588267835	NA	79	28	4h_DINCH_1000nM_ctrlnoLPS	4h_ctrlnoLPS_pvalue	UDP-N-acetyl-D-glucosamine Biosynthesis II
1170	1.311566632	-0.816	33	6	4h_DINCH_1000nM_ctrlnoLPS	4h_ctrlnoLPS_pvalue	Unfolded protein response
1171	0.439789443	NA	98	28	4h_DINCH_1000nM_ctrlnoLPS	4h_ctrlnoLPS_pvalue	Urea Cycle
1172	0	NA	91	28	4h_DINCH_1000nM_ctrlnoLPS	4h_ctrlnoLPS_pvalue	Uridine-5'-phosphate Biosynthesis
1173	1.028989049	0.816	281	23	4h_DINCH_1000nM_ctrlnoLPS	4h_ctrlnoLPS_pvalue	UVA-Induced MAPK Signaling
1174	0.737055388	NA	242	25	4h_DINCH_1000nM_ctrlnoLPS	4h_ctrlnoLPS_pvalue	Valine Degradation I
1175	1.021660503	0	63	12	4h_DINCH_1000nM_ctrlnoLPS	4h_ctrlnoLPS_pvalue	VEGF Signaling
1176	1.370081259	NA	157	28	4h_DINCH_1000nM_ctrlnoLPS	4h_ctrlnoLPS_pvalue	Virus Entry via Endocytic Pathways
1177	0.698826396	NA	146	28	4h_DINCH_1000nM_ctrlnoLPS	4h_ctrlnoLPS_pvalue	Vitamin-C Transport
1178	1.009604181	-0.378	240	28	4h_DINCH_1000nM_ctrlnoLPS	4h_ctrlnoLPS_pvalue	Wnt/Ca+ pathway
1179	0.828983797	NA	167	28	4h_DINCH_1000nM_ctrlnoLPS	4h_ctrlnoLPS_pvalue	Xanthine and Xanthosine Salvage
1180	1.246594405	-1	50	22	4h_DINCH_1000nM_ctrlnoLPS	4h_ctrlnoLPS_pvalue	Xenobiotic Metabolism AHR Signaling Pathway
1181	0.236897269	-0.707	159	18	4h_DINCH_1000nM_ctrlnoLPS	4h_ctrlnoLPS_pvalue	Xenobiotic Metabolism CAR Signaling Pathway
1182	0.214890946	0	78	11	4h_DINCH_1000nM_ctrlnoLPS	4h_ctrlnoLPS_pvalue	Xenobiotic Metabolism PXR Signaling Pathway
1183	0.913243767	NA	37	28	4h_DINCH_1000nM_ctrlnoLPS	4h_ctrlnoLPS_pvalue	Xenobiotic Metabolism Signaling
1184	0.402402907	NA	198	28	4h_DINCH_1000nM_ctrlnoLPS	4h_ctrlnoLPS_pvalue	Zymosterol Biosynthesis
1185	1.764573967	0	35	12	4h_DINCH_10000nM_ctrlnoLPS	4h_ctrlnoLPS_pvalue	?-Adrenergic Signaling
1186	0.57979905	NA	164	28	4h_DINCH_10000nM_ctrlnoLPS	4h_ctrlnoLPS_pvalue	?-glutamyl Cycle
1187	0.746539778	NA	221	29	4h_DINCH_10000nM_ctrlnoLPS	4h_ctrlnoLPS_pvalue	?-linolenate Biosynthesis II (Animals)
1188	1.36318341	-0.832	26	7	4h_DINCH_10000nM_ctrlnoLPS	4h_ctrlnoLPS_pvalue	14-3-3-mediated Signaling
1189	0.417130108	NA	211	28	4h_DINCH_10000nM_ctrlnoLPS	4h_ctrlnoLPS_pvalue	2-ketoglutarate Dehydrogenase Complex
1190	0.729584263	1.807	57	11	4h_DINCH_10000nM_ctrlnoLPS	4h_ctrlnoLPS_pvalue	3-phosphoinositide Biosynthesis
1191	0.318680342	NA	219	28	4h_DINCH_10000nM_ctrlnoLPS	4h_ctrlnoLPS_pvalue	4-1BB Signaling in T Lymphocytes
1192	0.324729232	NA	110	28	4h_DINCH_10000nM_ctrlnoLPS	4h_ctrlnoLPS_pvalue	Acetyl-CoA Biosynthesis I (Pyruvate Dehydrogenase Complex)
1193	0	NA	108	28	4h_DINCH_10000nM_ctrlnoLPS	4h_ctrlnoLPS_pvalue	Acetyl-CoA Biosynthesis III (from Citrate)
1194	1.339020086	-0.447	58	16	4h_DINCH_10000nM_ctrlnoLPS	4h_ctrlnoLPS_pvalue	Actin Cytoskeleton Signaling
1195	2.365999224	0.302	81	13	4h_DINCH_10000nM_ctrlnoLPS	4h_ctrlnoLPS_pvalue	Actin Nucleation by ARP-WASP Complex
1196	0.552746003	0.816	21	11	4h_DINCH_10000nM_ctrlnoLPS	4h_ctrlnoLPS_pvalue	Activation of IRF by Cytosolic Pattern Recognition Receptors
1197	0.465914886	0.378	267	23	4h_DINCH_10000nM_ctrlnoLPS	4h_ctrlnoLPS_pvalue	Acute Myeloid Leukemia Signaling
1198	0.555142781	NA	180	28	4h_DINCH_10000nM_ctrlnoLPS	4h_ctrlnoLPS_pvalue	Adenine and Adenosine Salvage I
1199	0.757605637	NA	117	28	4h_DINCH_10000nM_ctrlnoLPS	4h_ctrlnoLPS_pvalue	Adenine and Adenosine Salvage III
1200	0	NA	165	28	4h_DINCH_10000nM_ctrlnoLPS	4h_ctrlnoLPS_pvalue	Adenine and Adenosine Salvage VI
1201	0.701214214	NA	56	28	4h_DINCH_10000nM_ctrlnoLPS	4h_ctrlnoLPS_pvalue	Agranulocyte Adhesion and Diapedesis
1202	0.854860346	0.333	84	13	4h_DINCH_10000nM_ctrlnoLPS	4h_ctrlnoLPS_pvalue	Agrin Interactions at Neuromuscular Junction
1203	1.744295255	0.707	233	28	4h_DINCH_10000nM_ctrlnoLPS	4h_ctrlnoLPS_pvalue	Aldosterone Signaling in Epithelial Cells
1204	0.680927395	2	64	24	4h_DINCH_10000nM_ctrlnoLPS	4h_ctrlnoLPS_pvalue	Amyloid Processing
1205	0.717917188	0.378	286	20	4h_DINCH_10000nM_ctrlnoLPS	4h_ctrlnoLPS_pvalue	Angiopoietin Signaling
1206	0.8814325	NA	72	28	4h_DINCH_10000nM_ctrlnoLPS	4h_ctrlnoLPS_pvalue	Antigen Presentation Pathway
1207	0.399803718	-0.816	270	27	4h_DINCH_10000nM_ctrlnoLPS	4h_ctrlnoLPS_pvalue	Antioxidant Action of Vitamin C
1208	0.880358149	0.378	279	27	4h_DINCH_10000nM_ctrlnoLPS	4h_ctrlnoLPS_pvalue	Antiproliferative Role of Somatostatin Receptor 2
1209	0.813288803	0.333	280	26	4h_DINCH_10000nM_ctrlnoLPS	4h_ctrlnoLPS_pvalue	Apelin Adipocyte Signaling Pathway
1210	0.631950995	0.333	278	20	4h_DINCH_10000nM_ctrlnoLPS	4h_ctrlnoLPS_pvalue	Apelin Cardiomyocyte Signaling Pathway
1211	0.746539778	0	287	27	4h_DINCH_10000nM_ctrlnoLPS	4h_ctrlnoLPS_pvalue	Apelin Endothelial Signaling Pathway
1212	1.613824104	0	293	28	4h_DINCH_10000nM_ctrlnoLPS	4h_ctrlnoLPS_pvalue	Apoptosis Signaling
1213	0.836093244	NA	85	28	4h_DINCH_10000nM_ctrlnoLPS	4h_ctrlnoLPS_pvalue	Arginine Biosynthesis IV
1214	0.417130108	NA	101	28	4h_DINCH_10000nM_ctrlnoLPS	4h_ctrlnoLPS_pvalue	Arsenate Detoxification I (Glutaredoxin)
1215	1.261044313	0.905	253	28	4h_DINCH_10000nM_ctrlnoLPS	4h_ctrlnoLPS_pvalue	Aryl Hydrocarbon Receptor Signaling
1216	0	NA	207	28	4h_DINCH_10000nM_ctrlnoLPS	4h_ctrlnoLPS_pvalue	Asparagine Biosynthesis I
1217	0.465914886	NA	195	28	4h_DINCH_10000nM_ctrlnoLPS	4h_ctrlnoLPS_pvalue	Aspartate Biosynthesis
1218	0.757605637	NA	128	28	4h_DINCH_10000nM_ctrlnoLPS	4h_ctrlnoLPS_pvalue	Aspartate Degradation II
1219	0.294074891	NA	149	28	4h_DINCH_10000nM_ctrlnoLPS	4h_ctrlnoLPS_pvalue	Atherosclerosis Signaling
1220	0.179830686	-0.447	19	18	4h_DINCH_10000nM_ctrlnoLPS	4h_ctrlnoLPS_pvalue	ATM Signaling
1221	2.715899556	NA	143	28	4h_DINCH_10000nM_ctrlnoLPS	4h_ctrlnoLPS_pvalue	Autophagy
1222	0.813288803	NA	42	28	4h_DINCH_10000nM_ctrlnoLPS	4h_ctrlnoLPS_pvalue	Axonal Guidance Signaling
1223	1.014398192	0.471	177	12	4h_DINCH_10000nM_ctrlnoLPS	4h_ctrlnoLPS_pvalue	B Cell Receptor Signaling
1224	2.564315451	-1.265	76	4	4h_DINCH_10000nM_ctrlnoLPS	4h_ctrlnoLPS_pvalue	BAG2 Signaling Pathway
1225	0.465914886	NA	206	28	4h_DINCH_10000nM_ctrlnoLPS	4h_ctrlnoLPS_pvalue	BER pathway
1226	0	NA	113	28	4h_DINCH_10000nM_ctrlnoLPS	4h_ctrlnoLPS_pvalue	Bile Acid Biosynthesis, Neutral Pathway
1227	0.417130108	NA	144	28	4h_DINCH_10000nM_ctrlnoLPS	4h_ctrlnoLPS_pvalue	Branched-chain ?-keto acid Dehydrogenase Complex
1228	0.668733892	1.134	243	28	4h_DINCH_10000nM_ctrlnoLPS	4h_ctrlnoLPS_pvalue	Calcium-induced T Lymphocyte Apoptosis
1229	2.161987678	0.2	290	25	4h_DINCH_10000nM_ctrlnoLPS	4h_ctrlnoLPS_pvalue	Cardiac Hypertrophy Signaling
1230	3.180249933	NA	204	28	4h_DINCH_10000nM_ctrlnoLPS	4h_ctrlnoLPS_pvalue	Caveolar-mediated Endocytosis Signaling
1231	0.603617531	0.378	89	12	4h_DINCH_10000nM_ctrlnoLPS	4h_ctrlnoLPS_pvalue	CCR3 Signaling in Eosinophils
1232	0.246551083	-1	260	27	4h_DINCH_10000nM_ctrlnoLPS	4h_ctrlnoLPS_pvalue	CD27 Signaling in Lymphocytes
1233	1.36318341	-0.577	182	27	4h_DINCH_10000nM_ctrlnoLPS	4h_ctrlnoLPS_pvalue	CD28 Signaling in T Helper Cells
1234	0.417130108	0.447	251	29	4h_DINCH_10000nM_ctrlnoLPS	4h_ctrlnoLPS_pvalue	CD40 Signaling
1235	1.795323474	-0.302	73	13	4h_DINCH_10000nM_ctrlnoLPS	4h_ctrlnoLPS_pvalue	Cdc42 Signaling
1236	0.595249611	-0.333	59	12	4h_DINCH_10000nM_ctrlnoLPS	4h_ctrlnoLPS_pvalue	CDK5 Signaling
1237	0.399803718	-0.447	10	21	4h_DINCH_10000nM_ctrlnoLPS	4h_ctrlnoLPS_pvalue	Cell Cycle Control of Chromosomal Replication
1238	0.456816068	NA	218	28	4h_DINCH_10000nM_ctrlnoLPS	4h_ctrlnoLPS_pvalue	Cell Cycle: G2/M DNA Damage Checkpoint Regulation
1239	0.813288803	-0.632	291	27	4h_DINCH_10000nM_ctrlnoLPS	4h_ctrlnoLPS_pvalue	Ceramide Signaling
1240	1.018610497	0	271	20	4h_DINCH_10000nM_ctrlnoLPS	4h_ctrlnoLPS_pvalue	Chemokine Signaling
1241	0.631950995	1.265	163	26	4h_DINCH_10000nM_ctrlnoLPS	4h_ctrlnoLPS_pvalue	Cholecystokinin/Gastrin-mediated Signaling
1242	0.158795627	NA	115	28	4h_DINCH_10000nM_ctrlnoLPS	4h_ctrlnoLPS_pvalue	Cholesterol Biosynthesis I
1243	0.158795627	NA	176	28	4h_DINCH_10000nM_ctrlnoLPS	4h_ctrlnoLPS_pvalue	Cholesterol Biosynthesis II (via 24,25-dihydrolanosterol)
1244	0.158795627	NA	95	28	4h_DINCH_10000nM_ctrlnoLPS	4h_ctrlnoLPS_pvalue	Cholesterol Biosynthesis III (via Desmosterol)
1245	0.453496427	NA	145	28	4h_DINCH_10000nM_ctrlnoLPS	4h_ctrlnoLPS_pvalue	Chronic Myeloid Leukemia Signaling
1246	0.836093244	NA	140	28	4h_DINCH_10000nM_ctrlnoLPS	4h_ctrlnoLPS_pvalue	Citrulline-Nitric Oxide Cycle
1247	0.836093244	NA	130	28	4h_DINCH_10000nM_ctrlnoLPS	4h_ctrlnoLPS_pvalue	Citrulline Biosynthesis
1248	4.532570064	NA	190	28	4h_DINCH_10000nM_ctrlnoLPS	4h_ctrlnoLPS_pvalue	Clathrin-mediated Endocytosis Signaling
1249	2.430688882	0.218	83	17	4h_DINCH_10000nM_ctrlnoLPS	4h_ctrlnoLPS_pvalue	Coronavirus Pathogenesis Pathway
1250	0.417130108	NA	173	28	4h_DINCH_10000nM_ctrlnoLPS	4h_ctrlnoLPS_pvalue	Creatine-phosphate Biosynthesis
1251	0.786112102	-0.535	75	7	4h_DINCH_10000nM_ctrlnoLPS	4h_ctrlnoLPS_pvalue	CREB Signaling in Neurons
1252	1.069400094	NA	114	28	4h_DINCH_10000nM_ctrlnoLPS	4h_ctrlnoLPS_pvalue	CTLA4 Signaling in Cytotoxic T Lymphocytes
1253	1.346048772	0	40	27	4h_DINCH_10000nM_ctrlnoLPS	4h_ctrlnoLPS_pvalue	CXCR4 Signaling
1254	0.720587814	2.138	39	11	4h_DINCH_10000nM_ctrlnoLPS	4h_ctrlnoLPS_pvalue	D-myo-inositol-5-phosphate Metabolism
1255	1.139655121	1.342	29	24	4h_DINCH_10000nM_ctrlnoLPS	4h_ctrlnoLPS_pvalue	D-myo-inositol (1,4,5)-Trisphosphate Biosynthesis
1256	0.456816068	1.508	147	11	4h_DINCH_10000nM_ctrlnoLPS	4h_ctrlnoLPS_pvalue	D-myo-inositol (1,4,5,6)-Tetrakisphosphate Biosynthesis
1257	0.456816068	1.508	133	11	4h_DINCH_10000nM_ctrlnoLPS	4h_ctrlnoLPS_pvalue	D-myo-inositol (3,4,5,6)-tetrakisphosphate Biosynthesis
1258	0.331425593	-0.378	255	28	4h_DINCH_10000nM_ctrlnoLPS	4h_ctrlnoLPS_pvalue	Death Receptor Signaling
1259	0.746539778	NA	208	28	4h_DINCH_10000nM_ctrlnoLPS	4h_ctrlnoLPS_pvalue	DNA Double-Strand Break Repair by Non-Homologous End Joining
1260	0.507182999	NA	226	20	4h_DINCH_10000nM_ctrlnoLPS	4h_ctrlnoLPS_pvalue	Dopamine Degradation
1261	10.04079794	1.732	20	5	4h_DINCH_10000nM_ctrlnoLPS	4h_ctrlnoLPS_pvalue	EIF2 Signaling
1262	0.775512308	-1.155	23	20	4h_DINCH_10000nM_ctrlnoLPS	4h_ctrlnoLPS_pvalue	Endocannabinoid Neuronal Synapse Pathway
1263	0.287048638	NA	222	20	4h_DINCH_10000nM_ctrlnoLPS	4h_ctrlnoLPS_pvalue	Endoplasmic Reticulum Stress Pathway
1264	0.717917188	-0.816	184	20	4h_DINCH_10000nM_ctrlnoLPS	4h_ctrlnoLPS_pvalue	Ephrin B Signaling
1265	0.852864382	-1	1	7	4h_DINCH_10000nM_ctrlnoLPS	4h_ctrlnoLPS_pvalue	Ephrin Receptor Signaling
1266	0.702317583	NA	192	28	4h_DINCH_10000nM_ctrlnoLPS	4h_ctrlnoLPS_pvalue	Epithelial Adherens Junction Signaling
1267	0.832636211	1.604	31	19	4h_DINCH_10000nM_ctrlnoLPS	4h_ctrlnoLPS_pvalue	ERK/MAPK Signaling
1268	0.765821055	NA	186	28	4h_DINCH_10000nM_ctrlnoLPS	4h_ctrlnoLPS_pvalue	Erythropoietin Signaling
1269	0.720587814	0.816	229	28	4h_DINCH_10000nM_ctrlnoLPS	4h_ctrlnoLPS_pvalue	Estrogen-Dependent Breast Cancer Signaling
1270	0.363916221	NA	295	22	4h_DINCH_10000nM_ctrlnoLPS	4h_ctrlnoLPS_pvalue	Estrogen Biosynthesis
1271	3.068842721	0	273	26	4h_DINCH_10000nM_ctrlnoLPS	4h_ctrlnoLPS_pvalue	Estrogen Receptor Signaling
1272	0.326380981	NA	227	20	4h_DINCH_10000nM_ctrlnoLPS	4h_ctrlnoLPS_pvalue	Ethanol Degradation IV
1273	1.44117994	NA	154	28	4h_DINCH_10000nM_ctrlnoLPS	4h_ctrlnoLPS_pvalue	FAK Signaling
1274	0.631950995	NA	237	26	4h_DINCH_10000nM_ctrlnoLPS	4h_ctrlnoLPS_pvalue	FAT10 Signaling Pathway
1275	1.797432487	0.378	247	26	4h_DINCH_10000nM_ctrlnoLPS	4h_ctrlnoLPS_pvalue	Fatty Acid ?-oxidation I
1276	0.94265473	NA	104	28	4h_DINCH_10000nM_ctrlnoLPS	4h_ctrlnoLPS_pvalue	Fatty Acid Activation
1277	1.087163199	0	53	16	4h_DINCH_10000nM_ctrlnoLPS	4h_ctrlnoLPS_pvalue	Fc? Receptor-mediated Phagocytosis in Macrophages and Monocytes
1278	0.417130108	1.134	102	19	4h_DINCH_10000nM_ctrlnoLPS	4h_ctrlnoLPS_pvalue	FLT3 Signaling in Hematopoietic Progenitor Cells
1279	2.668684664	-0.943	15	13	4h_DINCH_10000nM_ctrlnoLPS	4h_ctrlnoLPS_pvalue	fMLP Signaling in Neutrophils
1280	0.363916221	NA	178	28	4h_DINCH_10000nM_ctrlnoLPS	4h_ctrlnoLPS_pvalue	Folate Polyglutamylation
1281	0.813288803	-0.905	71	6	4h_DINCH_10000nM_ctrlnoLPS	4h_ctrlnoLPS_pvalue	G Beta Gamma Signaling
1282	0.906369775	NA	109	28	4h_DINCH_10000nM_ctrlnoLPS	4h_ctrlnoLPS_pvalue	G Protein Signaling Mediated by Tubby
1283	1.744295255	0.728	262	28	4h_DINCH_10000nM_ctrlnoLPS	4h_ctrlnoLPS_pvalue	G?q Signaling
1284	0.363916221	NA	201	28	4h_DINCH_10000nM_ctrlnoLPS	4h_ctrlnoLPS_pvalue	Galactose Degradation I (Leloir Pathway)
1285	1.021485399	NA	209	28	4h_DINCH_10000nM_ctrlnoLPS	4h_ctrlnoLPS_pvalue	Gap Junction Signaling
1286	0.836093244	1.134	254	23	4h_DINCH_10000nM_ctrlnoLPS	4h_ctrlnoLPS_pvalue	GDNF Family Ligand-Receptor Interactions
1287	0.57979905	NA	213	28	4h_DINCH_10000nM_ctrlnoLPS	4h_ctrlnoLPS_pvalue	GDP-glucose Biosynthesis
1288	1.014398192	NA	191	28	4h_DINCH_10000nM_ctrlnoLPS	4h_ctrlnoLPS_pvalue	Germ Cell-Sertoli Cell Junction Signaling
1289	0.880358149	1.069	111	23	4h_DINCH_10000nM_ctrlnoLPS	4h_ctrlnoLPS_pvalue	Glioblastoma Multiforme Signaling
1290	1.185774064	1.667	43	26	4h_DINCH_10000nM_ctrlnoLPS	4h_ctrlnoLPS_pvalue	Glioma Invasiveness Signaling
1291	1.018610497	0.333	38	12	4h_DINCH_10000nM_ctrlnoLPS	4h_ctrlnoLPS_pvalue	Glioma Signaling
1292	1.607746708	NA	188	28	4h_DINCH_10000nM_ctrlnoLPS	4h_ctrlnoLPS_pvalue	Glucocorticoid Receptor Signaling
1293	0.813288803	0	2	9	4h_DINCH_10000nM_ctrlnoLPS	4h_ctrlnoLPS_pvalue	Gluconeogenesis I
1294	0.57979905	NA	214	28	4h_DINCH_10000nM_ctrlnoLPS	4h_ctrlnoLPS_pvalue	Glucose and Glucose-1-phosphate Degradation
1295	0.465914886	NA	212	28	4h_DINCH_10000nM_ctrlnoLPS	4h_ctrlnoLPS_pvalue	Glutamate Degradation II
1296	0.717917188	NA	66	28	4h_DINCH_10000nM_ctrlnoLPS	4h_ctrlnoLPS_pvalue	Glutamate Removal from Folates
1297	0.717917188	NA	185	28	4h_DINCH_10000nM_ctrlnoLPS	4h_ctrlnoLPS_pvalue	Glutamine Degradation I
1298	1.606693142	-1	266	13	4h_DINCH_10000nM_ctrlnoLPS	4h_ctrlnoLPS_pvalue	Glutaryl-CoA Degradation
1299	0.544957802	NA	228	20	4h_DINCH_10000nM_ctrlnoLPS	4h_ctrlnoLPS_pvalue	Glutathione-mediated Detoxification
1300	0.880358149	1	155	11	4h_DINCH_10000nM_ctrlnoLPS	4h_ctrlnoLPS_pvalue	Glutathione Redox Reactions I
1301	0.94265473	NA	153	28	4h_DINCH_10000nM_ctrlnoLPS	4h_ctrlnoLPS_pvalue	Glutathione Redox Reactions II
1302	0.324729232	NA	210	28	4h_DINCH_10000nM_ctrlnoLPS	4h_ctrlnoLPS_pvalue	Glycine Cleavage Complex
1303	0.757605637	NA	171	28	4h_DINCH_10000nM_ctrlnoLPS	4h_ctrlnoLPS_pvalue	Glycogen Biosynthesis II (from UDP-D-Glucose)
1304	1.744295255	1	92	11	4h_DINCH_10000nM_ctrlnoLPS	4h_ctrlnoLPS_pvalue	Glycogen Degradation II
1305	2.181157952	1.342	45	11	4h_DINCH_10000nM_ctrlnoLPS	4h_ctrlnoLPS_pvalue	Glycogen Degradation III
1306	0.813288803	2	24	3	4h_DINCH_10000nM_ctrlnoLPS	4h_ctrlnoLPS_pvalue	Glycolysis I
1307	1.464201366	0.333	16	12	4h_DINCH_10000nM_ctrlnoLPS	4h_ctrlnoLPS_pvalue	GM-CSF Signaling
1308	0.717917188	-0.775	17	7	4h_DINCH_10000nM_ctrlnoLPS	4h_ctrlnoLPS_pvalue	GNRH Signaling
1309	0.880358149	0	250	27	4h_DINCH_10000nM_ctrlnoLPS	4h_ctrlnoLPS_pvalue	GPCR-Mediated Integration of Enteroendocrine Signaling Exemplified by an L Cell
1310	1.098741107	NA	150	28	4h_DINCH_10000nM_ctrlnoLPS	4h_ctrlnoLPS_pvalue	Granzyme A Signaling
1311	0.673513983	NA	252	22	4h_DINCH_10000nM_ctrlnoLPS	4h_ctrlnoLPS_pvalue	Granzyme B Signaling
1312	1.455108739	NA	107	28	4h_DINCH_10000nM_ctrlnoLPS	4h_ctrlnoLPS_pvalue	Guanine and Guanosine Salvage I
1313	0.94265473	NA	129	28	4h_DINCH_10000nM_ctrlnoLPS	4h_ctrlnoLPS_pvalue	Heme Biosynthesis from Uroporphyrinogen-III I
1314	0	NA	99	28	4h_DINCH_10000nM_ctrlnoLPS	4h_ctrlnoLPS_pvalue	Heme Degradation
1315	1.414070932	1.706	30	9	4h_DINCH_10000nM_ctrlnoLPS	4h_ctrlnoLPS_pvalue	HIF1? Signaling
1316	0.4002366	2.449	44	10	4h_DINCH_10000nM_ctrlnoLPS	4h_ctrlnoLPS_pvalue	HIPPO signaling
1317	0.477133777	1.155	139	26	4h_DINCH_10000nM_ctrlnoLPS	4h_ctrlnoLPS_pvalue	HMGB1 Signaling
1318	2.161987678	0.333	294	22	4h_DINCH_10000nM_ctrlnoLPS	4h_ctrlnoLPS_pvalue	Huntington's Disease Signaling
1319	1.744295255	NA	162	28	4h_DINCH_10000nM_ctrlnoLPS	4h_ctrlnoLPS_pvalue	Hypoxia Signaling in the Cardiovascular System
1320	0.465914886	NA	116	28	4h_DINCH_10000nM_ctrlnoLPS	4h_ctrlnoLPS_pvalue	Hypusine Biosynthesis
1321	0.717917188	0.632	283	27	4h_DINCH_10000nM_ctrlnoLPS	4h_ctrlnoLPS_pvalue	iCOS-iCOSL Signaling in T Helper Cells
1322	0.930197797	0	272	27	4h_DINCH_10000nM_ctrlnoLPS	4h_ctrlnoLPS_pvalue	IGF-1 Signaling
1323	0.355977402	NA	160	28	4h_DINCH_10000nM_ctrlnoLPS	4h_ctrlnoLPS_pvalue	IL-12 Signaling and Production in Macrophages
1324	0.608298981	0.707	269	26	4h_DINCH_10000nM_ctrlnoLPS	4h_ctrlnoLPS_pvalue	IL-15 Signaling
1325	1.166840992	0.302	282	23	4h_DINCH_10000nM_ctrlnoLPS	4h_ctrlnoLPS_pvalue	IL-3 Signaling
1326	0.880358149	NA	202	28	4h_DINCH_10000nM_ctrlnoLPS	4h_ctrlnoLPS_pvalue	IL-4 Signaling
1327	2.024891251	0	183	27	4h_DINCH_10000nM_ctrlnoLPS	4h_ctrlnoLPS_pvalue	IL-8 Signaling
1328	0.489662724	1	274	26	4h_DINCH_10000nM_ctrlnoLPS	4h_ctrlnoLPS_pvalue	IL-9 Signaling
1329	1.098741107	-0.5	69	13	4h_DINCH_10000nM_ctrlnoLPS	4h_ctrlnoLPS_pvalue	ILK Signaling
1330	0.836093244	0	239	28	4h_DINCH_10000nM_ctrlnoLPS	4h_ctrlnoLPS_pvalue	Inflammasome pathway
1331	0.854860346	-0.277	60	7	4h_DINCH_10000nM_ctrlnoLPS	4h_ctrlnoLPS_pvalue	Inhibition of ARE-Mediated mRNA Degradation Pathway
1332	0.465914886	NA	132	28	4h_DINCH_10000nM_ctrlnoLPS	4h_ctrlnoLPS_pvalue	Inosine-5'-phosphate Biosynthesis II
1333	2.668684664	-0.192	152	23	4h_DINCH_10000nM_ctrlnoLPS	4h_ctrlnoLPS_pvalue	Insulin Secretion Signaling Pathway
1334	2.752964138	0.392	67	16	4h_DINCH_10000nM_ctrlnoLPS	4h_ctrlnoLPS_pvalue	Integrin Signaling
1335	0.465914886	2	52	8	4h_DINCH_10000nM_ctrlnoLPS	4h_ctrlnoLPS_pvalue	Interferon Signaling
1336	0	NA	156	28	4h_DINCH_10000nM_ctrlnoLPS	4h_ctrlnoLPS_pvalue	Iron homeostasis signaling pathway
1337	1.606693142	-1	96	25	4h_DINCH_10000nM_ctrlnoLPS	4h_ctrlnoLPS_pvalue	Isoleucine Degradation I
1338	0.885582888	0.632	275	26	4h_DINCH_10000nM_ctrlnoLPS	4h_ctrlnoLPS_pvalue	JAK/Stat Signaling
1339	1.470088953	NA	87	28	4h_DINCH_10000nM_ctrlnoLPS	4h_ctrlnoLPS_pvalue	Ketogenesis
1340	1.127924248	NA	193	28	4h_DINCH_10000nM_ctrlnoLPS	4h_ctrlnoLPS_pvalue	Ketolysis
1341	0.417130108	NA	48	28	4h_DINCH_10000nM_ctrlnoLPS	4h_ctrlnoLPS_pvalue	L-cysteine Degradation I
1342	1.744295255	0	172	28	4h_DINCH_10000nM_ctrlnoLPS	4h_ctrlnoLPS_pvalue	Leucine Degradation I
1343	0.94265473	-0.243	166	16	4h_DINCH_10000nM_ctrlnoLPS	4h_ctrlnoLPS_pvalue	Leukocyte Extravasation Signaling
1344	1.601546156	NA	106	28	4h_DINCH_10000nM_ctrlnoLPS	4h_ctrlnoLPS_pvalue	Lipid Antigen Presentation by CD1
1345	0.36720011	-0.447	248	20	4h_DINCH_10000nM_ctrlnoLPS	4h_ctrlnoLPS_pvalue	LPS/IL-1 Mediated Inhibition of RXR Function
1346	0.354103927	-0.816	93	18	4h_DINCH_10000nM_ctrlnoLPS	4h_ctrlnoLPS_pvalue	LXR/RXR Activation
1347	1.075363393	1.633	264	23	4h_DINCH_10000nM_ctrlnoLPS	4h_ctrlnoLPS_pvalue	Macropinocytosis Signaling
1348	0.57979905	NA	174	28	4h_DINCH_10000nM_ctrlnoLPS	4h_ctrlnoLPS_pvalue	Mechanisms of Viral Exit from Host Cells
1349	0.94265473	-0.333	170	27	4h_DINCH_10000nM_ctrlnoLPS	4h_ctrlnoLPS_pvalue	Melatonin Signaling
1350	0.746539778	NA	200	28	4h_DINCH_10000nM_ctrlnoLPS	4h_ctrlnoLPS_pvalue	Methylglyoxal Degradation III
1351	0.775512308	NA	216	28	4h_DINCH_10000nM_ctrlnoLPS	4h_ctrlnoLPS_pvalue	Mevalonate Pathway I
1352	0.331425593	NA	220	28	4h_DINCH_10000nM_ctrlnoLPS	4h_ctrlnoLPS_pvalue	MIF-mediated Glucocorticoid Regulation
1353	0.673513983	NA	203	28	4h_DINCH_10000nM_ctrlnoLPS	4h_ctrlnoLPS_pvalue	Mismatch Repair in Eukaryotes
1354	5.360763647	NA	169	28	4h_DINCH_10000nM_ctrlnoLPS	4h_ctrlnoLPS_pvalue	Mitochondrial Dysfunction
1355	0.746539778	NA	161	28	4h_DINCH_10000nM_ctrlnoLPS	4h_ctrlnoLPS_pvalue	Mitochondrial L-carnitine Shuttle Pathway
1356	0.465914886	NA	103	28	4h_DINCH_10000nM_ctrlnoLPS	4h_ctrlnoLPS_pvalue	Mitotic Roles of Polo-Like Kinase
1357	1.660585922	1.897	55	26	4h_DINCH_10000nM_ctrlnoLPS	4h_ctrlnoLPS_pvalue	mTOR Signaling
1358	0.836093244	NA	80	28	4h_DINCH_10000nM_ctrlnoLPS	4h_ctrlnoLPS_pvalue	Myo-inositol Biosynthesis
1359	1.139655121	0	74	12	4h_DINCH_10000nM_ctrlnoLPS	4h_ctrlnoLPS_pvalue	Natural Killer Cell Signaling
1360	1.189390111	-0.728	86	25	4h_DINCH_10000nM_ctrlnoLPS	4h_ctrlnoLPS_pvalue	Necroptosis Signaling Pathway
1361	1.470088953	-0.302	142	20	4h_DINCH_10000nM_ctrlnoLPS	4h_ctrlnoLPS_pvalue	NER Pathway
1362	0.759584569	0.378	217	28	4h_DINCH_10000nM_ctrlnoLPS	4h_ctrlnoLPS_pvalue	Netrin Signaling
1363	0.880358149	0.378	65	23	4h_DINCH_10000nM_ctrlnoLPS	4h_ctrlnoLPS_pvalue	Neuregulin Signaling
1364	1.00194676	NA	215	28	4h_DINCH_10000nM_ctrlnoLPS	4h_ctrlnoLPS_pvalue	nNOS Signaling in Neurons
1365	2.759125302	-1.069	6	12	4h_DINCH_10000nM_ctrlnoLPS	4h_ctrlnoLPS_pvalue	NRF2-mediated Oxidative Stress Response
1366	0.761164528	0.816	288	26	4h_DINCH_10000nM_ctrlnoLPS	4h_ctrlnoLPS_pvalue	Oncostatin M Signaling
1367	1.470088953	-2.041	88	4	4h_DINCH_10000nM_ctrlnoLPS	4h_ctrlnoLPS_pvalue	Opioid Signaling Pathway
1368	0.144226053	NA	112	28	4h_DINCH_10000nM_ctrlnoLPS	4h_ctrlnoLPS_pvalue	Oxidative Ethanol Degradation III
1369	3.730392656	1.342	13	1	4h_DINCH_10000nM_ctrlnoLPS	4h_ctrlnoLPS_pvalue	Oxidative Phosphorylation
1370	1.118233385	NA	179	28	4h_DINCH_10000nM_ctrlnoLPS	4h_ctrlnoLPS_pvalue	Oxidized GTP and dGTP Detoxification
1371	1.455108739	0.775	277	27	4h_DINCH_10000nM_ctrlnoLPS	4h_ctrlnoLPS_pvalue	P2Y Purigenic Receptor Signaling Pathway
1372	1.764573967	0.832	51	23	4h_DINCH_10000nM_ctrlnoLPS	4h_ctrlnoLPS_pvalue	p70S6K Signaling
1373	1.309486372	1.155	14	14	4h_DINCH_10000nM_ctrlnoLPS	4h_ctrlnoLPS_pvalue	PAK Signaling
1374	1.150349639	0.302	9	13	4h_DINCH_10000nM_ctrlnoLPS	4h_ctrlnoLPS_pvalue	Paxillin Signaling
1375	0.544957802	NA	241	20	4h_DINCH_10000nM_ctrlnoLPS	4h_ctrlnoLPS_pvalue	Pentose Phosphate Pathway
1376	0.324729232	NA	194	28	4h_DINCH_10000nM_ctrlnoLPS	4h_ctrlnoLPS_pvalue	Pentose Phosphate Pathway (Non-oxidative Branch)
1377	0.417130108	NA	205	28	4h_DINCH_10000nM_ctrlnoLPS	4h_ctrlnoLPS_pvalue	Pentose Phosphate Pathway (Oxidative Branch)
1378	0.94265473	0	256	27	4h_DINCH_10000nM_ctrlnoLPS	4h_ctrlnoLPS_pvalue	PFKFB4 Signaling Pathway
1379	0.836093244	NA	168	28	4h_DINCH_10000nM_ctrlnoLPS	4h_ctrlnoLPS_pvalue	Phagosome Formation
1380	4.326221958	NA	189	28	4h_DINCH_10000nM_ctrlnoLPS	4h_ctrlnoLPS_pvalue	Phagosome Maturation
1381	0.832636211	NA	100	28	4h_DINCH_10000nM_ctrlnoLPS	4h_ctrlnoLPS_pvalue	Phenylalanine Degradation IV (Mammalian, via Side Chain)
1382	1.436611186	0.218	292	27	4h_DINCH_10000nM_ctrlnoLPS	4h_ctrlnoLPS_pvalue	Phospholipase C Signaling
1383	1.261044313	0.5	249	23	4h_DINCH_10000nM_ctrlnoLPS	4h_ctrlnoLPS_pvalue	PI3K Signaling in B Lymphocytes
1384	0.717917188	-1.5	61	6	4h_DINCH_10000nM_ctrlnoLPS	4h_ctrlnoLPS_pvalue	PI3K/AKT Signaling
1385	0.880358149	1.291	181	23	4h_DINCH_10000nM_ctrlnoLPS	4h_ctrlnoLPS_pvalue	PKC? Signaling in T Lymphocytes
1386	0.813288803	-0.302	135	17	4h_DINCH_10000nM_ctrlnoLPS	4h_ctrlnoLPS_pvalue	PPAR Signaling
1387	1.656064453	-0.243	289	18	4h_DINCH_10000nM_ctrlnoLPS	4h_ctrlnoLPS_pvalue	PPAR?/RXR? Activation
1388	0.174788853	NA	122	28	4h_DINCH_10000nM_ctrlnoLPS	4h_ctrlnoLPS_pvalue	Pregnenolone Biosynthesis
1389	0.687992796	0.277	261	28	4h_DINCH_10000nM_ctrlnoLPS	4h_ctrlnoLPS_pvalue	Production of Nitric Oxide and Reactive Oxygen Species in Macrophages
1390	0.716725634	1.134	46	26	4h_DINCH_10000nM_ctrlnoLPS	4h_ctrlnoLPS_pvalue	Prolactin Signaling
1391	0.938373588	NA	197	28	4h_DINCH_10000nM_ctrlnoLPS	4h_ctrlnoLPS_pvalue	Prostate Cancer Signaling
1392	1.846977752	-1.461	62	6	4h_DINCH_10000nM_ctrlnoLPS	4h_ctrlnoLPS_pvalue	Protein Kinase A Signaling
1393	5.411718151	NA	138	28	4h_DINCH_10000nM_ctrlnoLPS	4h_ctrlnoLPS_pvalue	Protein Ubiquitination Pathway
1394	0.813288803	0.277	25	10	4h_DINCH_10000nM_ctrlnoLPS	4h_ctrlnoLPS_pvalue	PTEN Signaling
1395	0.494110916	NA	236	29	4h_DINCH_10000nM_ctrlnoLPS	4h_ctrlnoLPS_pvalue	Purine Nucleotides De Novo Biosynthesis II
1396	0.757605637	NA	141	28	4h_DINCH_10000nM_ctrlnoLPS	4h_ctrlnoLPS_pvalue	Purine Ribonucleosides Degradation to Ribose-1-phosphate
1397	0.507182999	NA	223	28	4h_DINCH_10000nM_ctrlnoLPS	4h_ctrlnoLPS_pvalue	Pyrimidine Deoxyribonucleotides De Novo Biosynthesis I
1398	0.377635703	-1	257	29	4h_DINCH_10000nM_ctrlnoLPS	4h_ctrlnoLPS_pvalue	Pyrimidine Ribonucleotides De Novo Biosynthesis
1399	0.94265473	NA	127	28	4h_DINCH_10000nM_ctrlnoLPS	4h_ctrlnoLPS_pvalue	Pyruvate Fermentation to Lactate
1400	2.555897485	0.471	49	14	4h_DINCH_10000nM_ctrlnoLPS	4h_ctrlnoLPS_pvalue	Rac Signaling
1401	0.36720011	NA	224	25	4h_DINCH_10000nM_ctrlnoLPS	4h_ctrlnoLPS_pvalue	RAN Signaling
1402	0.614404463	0.333	231	28	4h_DINCH_10000nM_ctrlnoLPS	4h_ctrlnoLPS_pvalue	RANK Signaling in Osteoclasts
1403	0.417130108	NA	151	28	4h_DINCH_10000nM_ctrlnoLPS	4h_ctrlnoLPS_pvalue	Rapoport-Luebering Glycolytic Shunt
1404	0.989284022	-0.832	77	13	4h_DINCH_10000nM_ctrlnoLPS	4h_ctrlnoLPS_pvalue	Reelin Signaling in Neurons
1405	3.180249933	0.258	32	16	4h_DINCH_10000nM_ctrlnoLPS	4h_ctrlnoLPS_pvalue	Regulation of Actin-based Motility by Rho
1406	2.668684664	1	34	23	4h_DINCH_10000nM_ctrlnoLPS	4h_ctrlnoLPS_pvalue	Regulation of Cellular Mechanics by Calpain Protease
1407	3.180249933	1	268	23	4h_DINCH_10000nM_ctrlnoLPS	4h_ctrlnoLPS_pvalue	Regulation of eIF4 and p70S6K Signaling
1408	0.760760373	NA	105	28	4h_DINCH_10000nM_ctrlnoLPS	4h_ctrlnoLPS_pvalue	Regulation of IL-2 Expression in Activated and Anergic T Lymphocytes
1409	3.0815077	0	263	26	4h_DINCH_10000nM_ctrlnoLPS	4h_ctrlnoLPS_pvalue	Remodeling of Epithelial Adherens Junctions
1410	0.456816068	0.447	97	12	4h_DINCH_10000nM_ctrlnoLPS	4h_ctrlnoLPS_pvalue	Renal Cell Carcinoma Signaling
1411	0.938373588	1.155	70	14	4h_DINCH_10000nM_ctrlnoLPS	4h_ctrlnoLPS_pvalue	Renin-Angiotensin Signaling
1412	1.859588331	-1.5	11	13	4h_DINCH_10000nM_ctrlnoLPS	4h_ctrlnoLPS_pvalue	RhoA Signaling
1413	2.668684664	0	134	22	4h_DINCH_10000nM_ctrlnoLPS	4h_ctrlnoLPS_pvalue	RhoGDI Signaling
1414	0.174788853	NA	199	28	4h_DINCH_10000nM_ctrlnoLPS	4h_ctrlnoLPS_pvalue	Role of IL-17A in Psoriasis
1415	0.377635703	0	225	29	4h_DINCH_10000nM_ctrlnoLPS	4h_ctrlnoLPS_pvalue	Role of IL-17F in Allergic Inflammatory Airway Diseases
1416	0.746539778	NA	124	28	4h_DINCH_10000nM_ctrlnoLPS	4h_ctrlnoLPS_pvalue	Role of JAK1, JAK2 and TYK2 in Interferon Signaling
1417	0.965645734	-0.229	137	12	4h_DINCH_10000nM_ctrlnoLPS	4h_ctrlnoLPS_pvalue	Role of NFAT in Cardiac Hypertrophy
1418	1.859588331	0.447	265	27	4h_DINCH_10000nM_ctrlnoLPS	4h_ctrlnoLPS_pvalue	Role of NFAT in Regulation of the Immune Response
1419	0.759584569	-1.134	258	27	4h_DINCH_10000nM_ctrlnoLPS	4h_ctrlnoLPS_pvalue	Role of PI3K/AKT Signaling in the Pathogenesis of Influenza
1420	0.938373588	3.051	22	3	4h_DINCH_10000nM_ctrlnoLPS	4h_ctrlnoLPS_pvalue	Role of PKR in Interferon Induction and Antiviral Response
1421	0.272498273	NA	230	29	4h_DINCH_10000nM_ctrlnoLPS	4h_ctrlnoLPS_pvalue	Role of RIG1-like Receptors in Antiviral Innate Immunity
1422	0.792547712	NA	158	28	4h_DINCH_10000nM_ctrlnoLPS	4h_ctrlnoLPS_pvalue	Role of Tissue Factor in Cancer
1423	0.555142781	NA	121	28	4h_DINCH_10000nM_ctrlnoLPS	4h_ctrlnoLPS_pvalue	S-adenosyl-L-methionine Biosynthesis
1424	0.757605637	NA	123	28	4h_DINCH_10000nM_ctrlnoLPS	4h_ctrlnoLPS_pvalue	Selenocysteine Biosynthesis II (Archaea and Eukaryotes)
1425	1.261044313	1.069	7	10	4h_DINCH_10000nM_ctrlnoLPS	4h_ctrlnoLPS_pvalue	Semaphorin Neuronal Repulsive Signaling Pathway
1426	0.8286166	NA	131	28	4h_DINCH_10000nM_ctrlnoLPS	4h_ctrlnoLPS_pvalue	Semaphorin Signaling in Neurons
1427	0.443419252	-0.447	120	18	4h_DINCH_10000nM_ctrlnoLPS	4h_ctrlnoLPS_pvalue	Senescence Pathway
1428	0.94265473	NA	94	28	4h_DINCH_10000nM_ctrlnoLPS	4h_ctrlnoLPS_pvalue	Serine Biosynthesis
1429	0.746539778	NA	125	28	4h_DINCH_10000nM_ctrlnoLPS	4h_ctrlnoLPS_pvalue	Sertoli Cell-Sertoli Cell Junction Signaling
1430	3.220454075	-1.177	119	13	4h_DINCH_10000nM_ctrlnoLPS	4h_ctrlnoLPS_pvalue	Signaling by Rho Family GTPases
1431	7.041298718	-1.219	36	4	4h_DINCH_10000nM_ctrlnoLPS	4h_ctrlnoLPS_pvalue	Sirtuin Signaling Pathway
1432	1.069400094	0.905	259	28	4h_DINCH_10000nM_ctrlnoLPS	4h_ctrlnoLPS_pvalue	Sphingosine-1-phosphate Signaling
1433	2.585590634	-2.111	18	2	4h_DINCH_10000nM_ctrlnoLPS	4h_ctrlnoLPS_pvalue	Spliceosomal Cycle
1434	0.56013457	0.447	232	28	4h_DINCH_10000nM_ctrlnoLPS	4h_ctrlnoLPS_pvalue	Stearate Biosynthesis I (Animals)
1435	0.254977263	NA	244	29	4h_DINCH_10000nM_ctrlnoLPS	4h_ctrlnoLPS_pvalue	Sucrose Degradation V (Mammalian)
1436	0.717917188	NA	187	28	4h_DINCH_10000nM_ctrlnoLPS	4h_ctrlnoLPS_pvalue	Sulfate Activation for Sulfonation
1437	1.810563662	0.302	296	20	4h_DINCH_10000nM_ctrlnoLPS	4h_ctrlnoLPS_pvalue	Sumoylation Pathway
1438	0.631950995	NA	245	26	4h_DINCH_10000nM_ctrlnoLPS	4h_ctrlnoLPS_pvalue	Superoxide Radicals Degradation
1439	0.603617531	NA	246	25	4h_DINCH_10000nM_ctrlnoLPS	4h_ctrlnoLPS_pvalue	Superpathway of Cholesterol Biosynthesis
1440	1.470088953	1	234	28	4h_DINCH_10000nM_ctrlnoLPS	4h_ctrlnoLPS_pvalue	Superpathway of Citrulline Metabolism
1441	0.631950995	NA	238	19	4h_DINCH_10000nM_ctrlnoLPS	4h_ctrlnoLPS_pvalue	Superpathway of Geranylgeranyldiphosphate Biosynthesis I (via Mevalonate)
1442	0.72565286	2.183	3	11	4h_DINCH_10000nM_ctrlnoLPS	4h_ctrlnoLPS_pvalue	Superpathway of Inositol Phosphate Compounds
1443	0.544957802	-2	27	15	4h_DINCH_10000nM_ctrlnoLPS	4h_ctrlnoLPS_pvalue	Superpathway of Methionine Degradation
1444	1.436611186	NA	235	23	4h_DINCH_10000nM_ctrlnoLPS	4h_ctrlnoLPS_pvalue	Superpathway of Serine and Glycine Biosynthesis I
1445	0.854860346	-0.277	4	7	4h_DINCH_10000nM_ctrlnoLPS	4h_ctrlnoLPS_pvalue	Synaptic Long Term Potentiation
1446	0.680927395	-0.218	12	12	4h_DINCH_10000nM_ctrlnoLPS	4h_ctrlnoLPS_pvalue	Synaptogenesis Signaling Pathway
1447	0.466032118	0.447	54	19	4h_DINCH_10000nM_ctrlnoLPS	4h_ctrlnoLPS_pvalue	Systemic Lupus Erythematosus In B Cell Signaling Pathway
1448	0.94265473	0.218	276	26	4h_DINCH_10000nM_ctrlnoLPS	4h_ctrlnoLPS_pvalue	Systemic Lupus Erythematosus In T Cell Signaling Pathway
1449	1.859588331	NA	126	28	4h_DINCH_10000nM_ctrlnoLPS	4h_ctrlnoLPS_pvalue	Systemic Lupus Erythematosus Signaling
1450	0.880358149	NA	47	28	4h_DINCH_10000nM_ctrlnoLPS	4h_ctrlnoLPS_pvalue	T Cell Receptor Signaling
1451	0.507182999	NA	28	14	4h_DINCH_10000nM_ctrlnoLPS	4h_ctrlnoLPS_pvalue	TCA Cycle II (Eukaryotic)
1452	2.406895057	1.213	8	11	4h_DINCH_10000nM_ctrlnoLPS	4h_ctrlnoLPS_pvalue	Tec Kinase Signaling
1453	0.930197797	-0.333	285	27	4h_DINCH_10000nM_ctrlnoLPS	4h_ctrlnoLPS_pvalue	Telomerase Signaling
1454	1.098741107	NA	196	28	4h_DINCH_10000nM_ctrlnoLPS	4h_ctrlnoLPS_pvalue	Telomere Extension by Telomerase
1455	0	NA	175	28	4h_DINCH_10000nM_ctrlnoLPS	4h_ctrlnoLPS_pvalue	Tetrahydrofolate Salvage from 5,10-methenyltetrahydrofolate
1456	1.594945056	-0.243	82	12	4h_DINCH_10000nM_ctrlnoLPS	4h_ctrlnoLPS_pvalue	Thrombin Signaling
1457	0.607433249	1.134	41	26	4h_DINCH_10000nM_ctrlnoLPS	4h_ctrlnoLPS_pvalue	Thrombopoietin Signaling
1458	0.717917188	NA	148	28	4h_DINCH_10000nM_ctrlnoLPS	4h_ctrlnoLPS_pvalue	Thyroid Hormone Biosynthesis
1459	0.734113871	NA	118	28	4h_DINCH_10000nM_ctrlnoLPS	4h_ctrlnoLPS_pvalue	Tight Junction Signaling
1460	0.555142781	1.134	5	11	4h_DINCH_10000nM_ctrlnoLPS	4h_ctrlnoLPS_pvalue	TREM1 Signaling
1461	3.180249933	-1.508	68	4	4h_DINCH_10000nM_ctrlnoLPS	4h_ctrlnoLPS_pvalue	tRNA Charging
1462	2.161987678	0	284	29	4h_DINCH_10000nM_ctrlnoLPS	4h_ctrlnoLPS_pvalue	Tryptophan Degradation III (Eukaryotic)
1463	0.757605637	NA	90	28	4h_DINCH_10000nM_ctrlnoLPS	4h_ctrlnoLPS_pvalue	Tryptophan Degradation to 2-amino-3-carboxymuconate Semialdehyde
1464	0.128050092	NA	136	28	4h_DINCH_10000nM_ctrlnoLPS	4h_ctrlnoLPS_pvalue	Ubiquinol-10 Biosynthesis (Eukaryotic)
1465	0.757605637	NA	79	28	4h_DINCH_10000nM_ctrlnoLPS	4h_ctrlnoLPS_pvalue	UDP-N-acetyl-D-glucosamine Biosynthesis II
1466	2.029227513	-2.333	33	6	4h_DINCH_10000nM_ctrlnoLPS	4h_ctrlnoLPS_pvalue	Unfolded protein response
1467	0.836093244	NA	98	28	4h_DINCH_10000nM_ctrlnoLPS	4h_ctrlnoLPS_pvalue	Urea Cycle
1468	0	NA	91	28	4h_DINCH_10000nM_ctrlnoLPS	4h_ctrlnoLPS_pvalue	Uridine-5'-phosphate Biosynthesis
1469	0.701214214	1.414	281	23	4h_DINCH_10000nM_ctrlnoLPS	4h_ctrlnoLPS_pvalue	UVA-Induced MAPK Signaling
1470	0.56013457	NA	242	25	4h_DINCH_10000nM_ctrlnoLPS	4h_ctrlnoLPS_pvalue	Valine Degradation I
1471	1.613824104	0.302	63	12	4h_DINCH_10000nM_ctrlnoLPS	4h_ctrlnoLPS_pvalue	VEGF Signaling
1472	5.360763647	NA	157	28	4h_DINCH_10000nM_ctrlnoLPS	4h_ctrlnoLPS_pvalue	Virus Entry via Endocytic Pathways
1473	0.287048638	NA	146	28	4h_DINCH_10000nM_ctrlnoLPS	4h_ctrlnoLPS_pvalue	Vitamin-C Transport
1474	0.717917188	0.378	240	28	4h_DINCH_10000nM_ctrlnoLPS	4h_ctrlnoLPS_pvalue	Wnt/Ca+ pathway
1475	0.717917188	NA	167	28	4h_DINCH_10000nM_ctrlnoLPS	4h_ctrlnoLPS_pvalue	Xanthine and Xanthosine Salvage
1476	2.161987678	1.387	50	22	4h_DINCH_10000nM_ctrlnoLPS	4h_ctrlnoLPS_pvalue	Xenobiotic Metabolism AHR Signaling Pathway
1477	0	-0.333	159	18	4h_DINCH_10000nM_ctrlnoLPS	4h_ctrlnoLPS_pvalue	Xenobiotic Metabolism CAR Signaling Pathway
1478	0.477133777	1.941	78	11	4h_DINCH_10000nM_ctrlnoLPS	4h_ctrlnoLPS_pvalue	Xenobiotic Metabolism PXR Signaling Pathway
1479	1.184869374	NA	37	28	4h_DINCH_10000nM_ctrlnoLPS	4h_ctrlnoLPS_pvalue	Xenobiotic Metabolism Signaling
1480	0.324729232	NA	198	28	4h_DINCH_10000nM_ctrlnoLPS	4h_ctrlnoLPS_pvalue	Zymosterol Biosynthesis
1481	1.199797	-1.134	35	12	4h_MINCH_10nM_ctrlnoLPS	4h_ctrlnoLPS_pvalue	?-Adrenergic Signaling
1482	0.228165786	NA	164	28	4h_MINCH_10nM_ctrlnoLPS	4h_ctrlnoLPS_pvalue	?-glutamyl Cycle
1483	0.171199275	NA	221	29	4h_MINCH_10nM_ctrlnoLPS	4h_ctrlnoLPS_pvalue	?-linolenate Biosynthesis II (Animals)
1484	0.580288447	-3	26	7	4h_MINCH_10nM_ctrlnoLPS	4h_ctrlnoLPS_pvalue	14-3-3-mediated Signaling
1485	0.387801319	NA	211	28	4h_MINCH_10nM_ctrlnoLPS	4h_ctrlnoLPS_pvalue	2-ketoglutarate Dehydrogenase Complex
1486	0.3263556	0	57	11	4h_MINCH_10nM_ctrlnoLPS	4h_ctrlnoLPS_pvalue	3-phosphoinositide Biosynthesis
1487	0.175753659	NA	219	28	4h_MINCH_10nM_ctrlnoLPS	4h_ctrlnoLPS_pvalue	4-1BB Signaling in T Lymphocytes
1488	0.770555006	NA	110	28	4h_MINCH_10nM_ctrlnoLPS	4h_ctrlnoLPS_pvalue	Acetyl-CoA Biosynthesis I (Pyruvate Dehydrogenase Complex)
1489	0.683563789	NA	108	28	4h_MINCH_10nM_ctrlnoLPS	4h_ctrlnoLPS_pvalue	Acetyl-CoA Biosynthesis III (from Citrate)
1490	2.602856144	0	58	16	4h_MINCH_10nM_ctrlnoLPS	4h_ctrlnoLPS_pvalue	Actin Cytoskeleton Signaling
1491	1.180706295	0	81	13	4h_MINCH_10nM_ctrlnoLPS	4h_ctrlnoLPS_pvalue	Actin Nucleation by ARP-WASP Complex
1492	0.898926353	1.134	21	11	4h_MINCH_10nM_ctrlnoLPS	4h_ctrlnoLPS_pvalue	Activation of IRF by Cytosolic Pattern Recognition Receptors
1493	0.185017088	-1.342	267	23	4h_MINCH_10nM_ctrlnoLPS	4h_ctrlnoLPS_pvalue	Acute Myeloid Leukemia Signaling
1494	0.529998715	NA	180	28	4h_MINCH_10nM_ctrlnoLPS	4h_ctrlnoLPS_pvalue	Adenine and Adenosine Salvage I
1495	0.3263556	NA	117	28	4h_MINCH_10nM_ctrlnoLPS	4h_ctrlnoLPS_pvalue	Adenine and Adenosine Salvage III
1496	0	NA	165	28	4h_MINCH_10nM_ctrlnoLPS	4h_ctrlnoLPS_pvalue	Adenine and Adenosine Salvage VI
1497	0.769845898	NA	56	28	4h_MINCH_10nM_ctrlnoLPS	4h_ctrlnoLPS_pvalue	Agranulocyte Adhesion and Diapedesis
1498	0.587115024	-0.378	84	13	4h_MINCH_10nM_ctrlnoLPS	4h_ctrlnoLPS_pvalue	Agrin Interactions at Neuromuscular Junction
1499	0.770555006	NA	233	28	4h_MINCH_10nM_ctrlnoLPS	4h_ctrlnoLPS_pvalue	Aldosterone Signaling in Epithelial Cells
1500	0.192252498	NA	64	24	4h_MINCH_10nM_ctrlnoLPS	4h_ctrlnoLPS_pvalue	Amyloid Processing
1501	0.184856345	-1	286	20	4h_MINCH_10nM_ctrlnoLPS	4h_ctrlnoLPS_pvalue	Angiopoietin Signaling
1502	1.512000499	NA	72	28	4h_MINCH_10nM_ctrlnoLPS	4h_ctrlnoLPS_pvalue	Antigen Presentation Pathway
1503	0	NA	270	27	4h_MINCH_10nM_ctrlnoLPS	4h_ctrlnoLPS_pvalue	Antioxidant Action of Vitamin C
1504	0.607441431	-0.816	279	27	4h_MINCH_10nM_ctrlnoLPS	4h_ctrlnoLPS_pvalue	Antiproliferative Role of Somatostatin Receptor 2
1505	1.753626542	0.302	280	26	4h_MINCH_10nM_ctrlnoLPS	4h_ctrlnoLPS_pvalue	Apelin Adipocyte Signaling Pathway
1506	0.579868353	-0.707	278	20	4h_MINCH_10nM_ctrlnoLPS	4h_ctrlnoLPS_pvalue	Apelin Cardiomyocyte Signaling Pathway
1507	0.228529355	-1.134	287	27	4h_MINCH_10nM_ctrlnoLPS	4h_ctrlnoLPS_pvalue	Apelin Endothelial Signaling Pathway
1508	0.871938803	1.265	293	28	4h_MINCH_10nM_ctrlnoLPS	4h_ctrlnoLPS_pvalue	Apoptosis Signaling
1509	0.872369377	NA	85	28	4h_MINCH_10nM_ctrlnoLPS	4h_ctrlnoLPS_pvalue	Arginine Biosynthesis IV
1510	0.387801319	NA	101	28	4h_MINCH_10nM_ctrlnoLPS	4h_ctrlnoLPS_pvalue	Arsenate Detoxification I (Glutaredoxin)
1511	0.580288447	-0.447	253	28	4h_MINCH_10nM_ctrlnoLPS	4h_ctrlnoLPS_pvalue	Aryl Hydrocarbon Receptor Signaling
1512	0.683563789	NA	207	28	4h_MINCH_10nM_ctrlnoLPS	4h_ctrlnoLPS_pvalue	Asparagine Biosynthesis I
1513	0.454412189	NA	195	28	4h_MINCH_10nM_ctrlnoLPS	4h_ctrlnoLPS_pvalue	Aspartate Biosynthesis
1514	0.770555006	NA	128	28	4h_MINCH_10nM_ctrlnoLPS	4h_ctrlnoLPS_pvalue	Aspartate Degradation II
1515	1.134217316	NA	149	28	4h_MINCH_10nM_ctrlnoLPS	4h_ctrlnoLPS_pvalue	Atherosclerosis Signaling
1516	0.898926353	-1.134	19	18	4h_MINCH_10nM_ctrlnoLPS	4h_ctrlnoLPS_pvalue	ATM Signaling
1517	0.97387678	NA	143	28	4h_MINCH_10nM_ctrlnoLPS	4h_ctrlnoLPS_pvalue	Autophagy
1518	0.352068287	NA	42	28	4h_MINCH_10nM_ctrlnoLPS	4h_ctrlnoLPS_pvalue	Axonal Guidance Signaling
1519	0.878312278	-1.807	177	12	4h_MINCH_10nM_ctrlnoLPS	4h_ctrlnoLPS_pvalue	B Cell Receptor Signaling
1520	1.905320161	-2.121	76	4	4h_MINCH_10nM_ctrlnoLPS	4h_ctrlnoLPS_pvalue	BAG2 Signaling Pathway
1521	0.185017088	NA	206	28	4h_MINCH_10nM_ctrlnoLPS	4h_ctrlnoLPS_pvalue	BER pathway
1522	0.518645718	NA	113	28	4h_MINCH_10nM_ctrlnoLPS	4h_ctrlnoLPS_pvalue	Bile Acid Biosynthesis, Neutral Pathway
1523	0.992949514	NA	144	28	4h_MINCH_10nM_ctrlnoLPS	4h_ctrlnoLPS_pvalue	Branched-chain ?-keto acid Dehydrogenase Complex
1524	0.3867392	-0.447	243	28	4h_MINCH_10nM_ctrlnoLPS	4h_ctrlnoLPS_pvalue	Calcium-induced T Lymphocyte Apoptosis
1525	0.535835847	-0.258	290	25	4h_MINCH_10nM_ctrlnoLPS	4h_ctrlnoLPS_pvalue	Cardiac Hypertrophy Signaling
1526	3.459114088	NA	204	28	4h_MINCH_10nM_ctrlnoLPS	4h_ctrlnoLPS_pvalue	Caveolar-mediated Endocytosis Signaling
1527	0.607441431	-2	89	12	4h_MINCH_10nM_ctrlnoLPS	4h_ctrlnoLPS_pvalue	CCR3 Signaling in Eosinophils
1528	0.171199275	NA	260	27	4h_MINCH_10nM_ctrlnoLPS	4h_ctrlnoLPS_pvalue	CD27 Signaling in Lymphocytes
1529	0.454412189	-0.707	182	27	4h_MINCH_10nM_ctrlnoLPS	4h_ctrlnoLPS_pvalue	CD28 Signaling in T Helper Cells
1530	0.198053224	1	251	29	4h_MINCH_10nM_ctrlnoLPS	4h_ctrlnoLPS_pvalue	CD40 Signaling
1531	1.141692979	-0.577	73	13	4h_MINCH_10nM_ctrlnoLPS	4h_ctrlnoLPS_pvalue	Cdc42 Signaling
1532	0.770555006	-1.667	59	12	4h_MINCH_10nM_ctrlnoLPS	4h_ctrlnoLPS_pvalue	CDK5 Signaling
1533	0	NA	10	21	4h_MINCH_10nM_ctrlnoLPS	4h_ctrlnoLPS_pvalue	Cell Cycle Control of Chromosomal Replication
1534	0.527863188	NA	218	28	4h_MINCH_10nM_ctrlnoLPS	4h_ctrlnoLPS_pvalue	Cell Cycle: G2/M DNA Damage Checkpoint Regulation
1535	1.048670793	-0.632	291	27	4h_MINCH_10nM_ctrlnoLPS	4h_ctrlnoLPS_pvalue	Ceramide Signaling
1536	1.019881832	-1	271	20	4h_MINCH_10nM_ctrlnoLPS	4h_ctrlnoLPS_pvalue	Chemokine Signaling
1537	0.487023946	-0.333	163	26	4h_MINCH_10nM_ctrlnoLPS	4h_ctrlnoLPS_pvalue	Cholecystokinin/Gastrin-mediated Signaling
1538	0.175753659	NA	115	28	4h_MINCH_10nM_ctrlnoLPS	4h_ctrlnoLPS_pvalue	Cholesterol Biosynthesis I
1539	0.175753659	NA	176	28	4h_MINCH_10nM_ctrlnoLPS	4h_ctrlnoLPS_pvalue	Cholesterol Biosynthesis II (via 24,25-dihydrolanosterol)
1540	0.175753659	NA	95	28	4h_MINCH_10nM_ctrlnoLPS	4h_ctrlnoLPS_pvalue	Cholesterol Biosynthesis III (via Desmosterol)
1541	0.198053224	NA	145	28	4h_MINCH_10nM_ctrlnoLPS	4h_ctrlnoLPS_pvalue	Chronic Myeloid Leukemia Signaling
1542	0.872369377	NA	140	28	4h_MINCH_10nM_ctrlnoLPS	4h_ctrlnoLPS_pvalue	Citrulline-Nitric Oxide Cycle
1543	0.352068287	NA	130	28	4h_MINCH_10nM_ctrlnoLPS	4h_ctrlnoLPS_pvalue	Citrulline Biosynthesis
1544	2.556690673	NA	190	28	4h_MINCH_10nM_ctrlnoLPS	4h_ctrlnoLPS_pvalue	Clathrin-mediated Endocytosis Signaling
1545	2.158934123	0.943	83	17	4h_MINCH_10nM_ctrlnoLPS	4h_ctrlnoLPS_pvalue	Coronavirus Pathogenesis Pathway
1546	0.387801319	NA	173	28	4h_MINCH_10nM_ctrlnoLPS	4h_ctrlnoLPS_pvalue	Creatine-phosphate Biosynthesis
1547	0.417010374	-3.162	75	7	4h_MINCH_10nM_ctrlnoLPS	4h_ctrlnoLPS_pvalue	CREB Signaling in Neurons
1548	1.818509374	NA	114	28	4h_MINCH_10nM_ctrlnoLPS	4h_ctrlnoLPS_pvalue	CTLA4 Signaling in Cytotoxic T Lymphocytes
1549	0.546410533	-0.632	40	27	4h_MINCH_10nM_ctrlnoLPS	4h_ctrlnoLPS_pvalue	CXCR4 Signaling
1550	0.383701839	0	39	11	4h_MINCH_10nM_ctrlnoLPS	4h_ctrlnoLPS_pvalue	D-myo-inositol-5-phosphate Metabolism
1551	0	NA	29	24	4h_MINCH_10nM_ctrlnoLPS	4h_ctrlnoLPS_pvalue	D-myo-inositol (1,4,5)-Trisphosphate Biosynthesis
1552	0.466459778	0	147	11	4h_MINCH_10nM_ctrlnoLPS	4h_ctrlnoLPS_pvalue	D-myo-inositol (1,4,5,6)-Tetrakisphosphate Biosynthesis
1553	0.466459778	0	133	11	4h_MINCH_10nM_ctrlnoLPS	4h_ctrlnoLPS_pvalue	D-myo-inositol (3,4,5,6)-tetrakisphosphate Biosynthesis
1554	0.766804625	1	255	28	4h_MINCH_10nM_ctrlnoLPS	4h_ctrlnoLPS_pvalue	Death Receptor Signaling
1555	1.306747585	NA	208	28	4h_MINCH_10nM_ctrlnoLPS	4h_ctrlnoLPS_pvalue	DNA Double-Strand Break Repair by Non-Homologous End Joining
1556	0.29908694	NA	226	20	4h_MINCH_10nM_ctrlnoLPS	4h_ctrlnoLPS_pvalue	Dopamine Degradation
1557	15.27992172	-0.186	20	5	4h_MINCH_10nM_ctrlnoLPS	4h_ctrlnoLPS_pvalue	EIF2 Signaling
1558	0.171199275	-0.816	23	20	4h_MINCH_10nM_ctrlnoLPS	4h_ctrlnoLPS_pvalue	Endocannabinoid Neuronal Synapse Pathway
1559	0.320232897	NA	222	20	4h_MINCH_10nM_ctrlnoLPS	4h_ctrlnoLPS_pvalue	Endoplasmic Reticulum Stress Pathway
1560	0.621402339	NA	184	20	4h_MINCH_10nM_ctrlnoLPS	4h_ctrlnoLPS_pvalue	Ephrin B Signaling
1561	0.85624308	-1.807	1	7	4h_MINCH_10nM_ctrlnoLPS	4h_ctrlnoLPS_pvalue	Ephrin Receptor Signaling
1562	0.454412189	NA	192	28	4h_MINCH_10nM_ctrlnoLPS	4h_ctrlnoLPS_pvalue	Epithelial Adherens Junction Signaling
1563	1.203152505	-1	31	19	4h_MINCH_10nM_ctrlnoLPS	4h_ctrlnoLPS_pvalue	ERK/MAPK Signaling
1564	0.529998715	NA	186	28	4h_MINCH_10nM_ctrlnoLPS	4h_ctrlnoLPS_pvalue	Erythropoietin Signaling
1565	0.185017088	NA	229	28	4h_MINCH_10nM_ctrlnoLPS	4h_ctrlnoLPS_pvalue	Estrogen-Dependent Breast Cancer Signaling
1566	0.190978727	NA	295	22	4h_MINCH_10nM_ctrlnoLPS	4h_ctrlnoLPS_pvalue	Estrogen Biosynthesis
1567	1.895354395	-1.3	273	26	4h_MINCH_10nM_ctrlnoLPS	4h_ctrlnoLPS_pvalue	Estrogen Receptor Signaling
1568	0.348345209	NA	227	20	4h_MINCH_10nM_ctrlnoLPS	4h_ctrlnoLPS_pvalue	Ethanol Degradation IV
1569	0.701445473	NA	154	28	4h_MINCH_10nM_ctrlnoLPS	4h_ctrlnoLPS_pvalue	FAK Signaling
1570	0.354924006	NA	237	26	4h_MINCH_10nM_ctrlnoLPS	4h_ctrlnoLPS_pvalue	FAT10 Signaling Pathway
1571	1.572531867	-0.816	247	26	4h_MINCH_10nM_ctrlnoLPS	4h_ctrlnoLPS_pvalue	Fatty Acid ?-oxidation I
1572	0.207790104	NA	104	28	4h_MINCH_10nM_ctrlnoLPS	4h_ctrlnoLPS_pvalue	Fatty Acid Activation
1573	0.898926353	0.632	53	16	4h_MINCH_10nM_ctrlnoLPS	4h_ctrlnoLPS_pvalue	Fc? Receptor-mediated Phagocytosis in Macrophages and Monocytes
1574	0.354924006	-1.633	102	19	4h_MINCH_10nM_ctrlnoLPS	4h_ctrlnoLPS_pvalue	FLT3 Signaling in Hematopoietic Progenitor Cells
1575	1.572531867	-0.832	15	13	4h_MINCH_10nM_ctrlnoLPS	4h_ctrlnoLPS_pvalue	fMLP Signaling in Neutrophils
1576	0.352068287	NA	178	28	4h_MINCH_10nM_ctrlnoLPS	4h_ctrlnoLPS_pvalue	Folate Polyglutamylation
1577	0.666600518	-2.333	71	6	4h_MINCH_10nM_ctrlnoLPS	4h_ctrlnoLPS_pvalue	G Beta Gamma Signaling
1578	0.419823063	NA	109	28	4h_MINCH_10nM_ctrlnoLPS	4h_ctrlnoLPS_pvalue	G Protein Signaling Mediated by Tubby
1579	0.372638929	0.333	262	28	4h_MINCH_10nM_ctrlnoLPS	4h_ctrlnoLPS_pvalue	G?q Signaling
1580	0.352068287	NA	201	28	4h_MINCH_10nM_ctrlnoLPS	4h_ctrlnoLPS_pvalue	Galactose Degradation I (Leloir Pathway)
1581	0.193801746	NA	209	28	4h_MINCH_10nM_ctrlnoLPS	4h_ctrlnoLPS_pvalue	Gap Junction Signaling
1582	0.286875609	-2	254	23	4h_MINCH_10nM_ctrlnoLPS	4h_ctrlnoLPS_pvalue	GDNF Family Ligand-Receptor Interactions
1583	1.134217316	NA	213	28	4h_MINCH_10nM_ctrlnoLPS	4h_ctrlnoLPS_pvalue	GDP-glucose Biosynthesis
1584	0.657174395	NA	191	28	4h_MINCH_10nM_ctrlnoLPS	4h_ctrlnoLPS_pvalue	Germ Cell-Sertoli Cell Junction Signaling
1585	0	-1.89	111	23	4h_MINCH_10nM_ctrlnoLPS	4h_ctrlnoLPS_pvalue	Glioblastoma Multiforme Signaling
1586	0.459921182	0	43	26	4h_MINCH_10nM_ctrlnoLPS	4h_ctrlnoLPS_pvalue	Glioma Invasiveness Signaling
1587	0.529998715	-2.333	38	12	4h_MINCH_10nM_ctrlnoLPS	4h_ctrlnoLPS_pvalue	Glioma Signaling
1588	1.019881832	NA	188	28	4h_MINCH_10nM_ctrlnoLPS	4h_ctrlnoLPS_pvalue	Glucocorticoid Receptor Signaling
1589	3.519633034	1.414	2	9	4h_MINCH_10nM_ctrlnoLPS	4h_ctrlnoLPS_pvalue	Gluconeogenesis I
1590	1.134217316	NA	214	28	4h_MINCH_10nM_ctrlnoLPS	4h_ctrlnoLPS_pvalue	Glucose and Glucose-1-phosphate Degradation
1591	0.454412189	NA	212	28	4h_MINCH_10nM_ctrlnoLPS	4h_ctrlnoLPS_pvalue	Glutamate Degradation II
1592	0.683563789	NA	66	28	4h_MINCH_10nM_ctrlnoLPS	4h_ctrlnoLPS_pvalue	Glutamate Removal from Folates
1593	0.683563789	NA	185	28	4h_MINCH_10nM_ctrlnoLPS	4h_ctrlnoLPS_pvalue	Glutamine Degradation I
1594	0.684160873	NA	266	13	4h_MINCH_10nM_ctrlnoLPS	4h_ctrlnoLPS_pvalue	Glutaryl-CoA Degradation
1595	2.115339349	0	228	20	4h_MINCH_10nM_ctrlnoLPS	4h_ctrlnoLPS_pvalue	Glutathione-mediated Detoxification
1596	2.188580751	0.816	155	11	4h_MINCH_10nM_ctrlnoLPS	4h_ctrlnoLPS_pvalue	Glutathione Redox Reactions I
1597	0.387801319	NA	153	28	4h_MINCH_10nM_ctrlnoLPS	4h_ctrlnoLPS_pvalue	Glutathione Redox Reactions II
1598	0.3263556	NA	210	28	4h_MINCH_10nM_ctrlnoLPS	4h_ctrlnoLPS_pvalue	Glycine Cleavage Complex
1599	0.3263556	NA	171	28	4h_MINCH_10nM_ctrlnoLPS	4h_ctrlnoLPS_pvalue	Glycogen Biosynthesis II (from UDP-D-Glucose)
1600	2.819877015	1.342	92	11	4h_MINCH_10nM_ctrlnoLPS	4h_ctrlnoLPS_pvalue	Glycogen Degradation II
1601	2.497960697	1.342	45	11	4h_MINCH_10nM_ctrlnoLPS	4h_ctrlnoLPS_pvalue	Glycogen Degradation III
1602	4.541259654	3	24	3	4h_MINCH_10nM_ctrlnoLPS	4h_ctrlnoLPS_pvalue	Glycolysis I
1603	1.134217316	-2.121	16	12	4h_MINCH_10nM_ctrlnoLPS	4h_ctrlnoLPS_pvalue	GM-CSF Signaling
1604	0.80339932	-2.138	17	7	4h_MINCH_10nM_ctrlnoLPS	4h_ctrlnoLPS_pvalue	GNRH Signaling
1605	0	NA	250	27	4h_MINCH_10nM_ctrlnoLPS	4h_ctrlnoLPS_pvalue	GPCR-Mediated Integration of Enteroendocrine Signaling Exemplified by an L Cell
1606	0.743939384	NA	150	28	4h_MINCH_10nM_ctrlnoLPS	4h_ctrlnoLPS_pvalue	Granzyme A Signaling
1607	1.149132027	-1	252	22	4h_MINCH_10nM_ctrlnoLPS	4h_ctrlnoLPS_pvalue	Granzyme B Signaling
1608	0.529998715	NA	107	28	4h_MINCH_10nM_ctrlnoLPS	4h_ctrlnoLPS_pvalue	Guanine and Guanosine Salvage I
1609	0.387801319	NA	129	28	4h_MINCH_10nM_ctrlnoLPS	4h_ctrlnoLPS_pvalue	Heme Biosynthesis from Uroporphyrinogen-III I
1610	0	NA	99	28	4h_MINCH_10nM_ctrlnoLPS	4h_ctrlnoLPS_pvalue	Heme Degradation
1611	2.703599383	0.816	30	9	4h_MINCH_10nM_ctrlnoLPS	4h_ctrlnoLPS_pvalue	HIF1? Signaling
1612	1.141692979	1.134	44	10	4h_MINCH_10nM_ctrlnoLPS	4h_ctrlnoLPS_pvalue	HIPPO signaling
1613	0.3263556	0.632	139	26	4h_MINCH_10nM_ctrlnoLPS	4h_ctrlnoLPS_pvalue	HMGB1 Signaling
1614	2.556690673	-1.134	294	22	4h_MINCH_10nM_ctrlnoLPS	4h_ctrlnoLPS_pvalue	Huntington's Disease Signaling
1615	0.802594481	NA	162	28	4h_MINCH_10nM_ctrlnoLPS	4h_ctrlnoLPS_pvalue	Hypoxia Signaling in the Cardiovascular System
1616	0	NA	116	28	4h_MINCH_10nM_ctrlnoLPS	4h_ctrlnoLPS_pvalue	Hypusine Biosynthesis
1617	0.535835847	-0.707	283	27	4h_MINCH_10nM_ctrlnoLPS	4h_ctrlnoLPS_pvalue	iCOS-iCOSL Signaling in T Helper Cells
1618	0.577745509	-1.89	272	27	4h_MINCH_10nM_ctrlnoLPS	4h_ctrlnoLPS_pvalue	IGF-1 Signaling
1619	0.459921182	NA	160	28	4h_MINCH_10nM_ctrlnoLPS	4h_ctrlnoLPS_pvalue	IL-12 Signaling and Production in Macrophages
1620	0.160626052	-1	269	26	4h_MINCH_10nM_ctrlnoLPS	4h_ctrlnoLPS_pvalue	IL-15 Signaling
1621	0.902875734	-2.333	282	23	4h_MINCH_10nM_ctrlnoLPS	4h_ctrlnoLPS_pvalue	IL-3 Signaling
1622	0.481404699	NA	202	28	4h_MINCH_10nM_ctrlnoLPS	4h_ctrlnoLPS_pvalue	IL-4 Signaling
1623	1.155455633	-0.728	183	27	4h_MINCH_10nM_ctrlnoLPS	4h_ctrlnoLPS_pvalue	IL-8 Signaling
1624	0.171199275	NA	274	26	4h_MINCH_10nM_ctrlnoLPS	4h_ctrlnoLPS_pvalue	IL-9 Signaling
1625	1.657293189	0.5	69	13	4h_MINCH_10nM_ctrlnoLPS	4h_ctrlnoLPS_pvalue	ILK Signaling
1626	0.939085421	1	239	28	4h_MINCH_10nM_ctrlnoLPS	4h_ctrlnoLPS_pvalue	Inflammasome pathway
1627	0.939672914	-0.577	60	7	4h_MINCH_10nM_ctrlnoLPS	4h_ctrlnoLPS_pvalue	Inhibition of ARE-Mediated mRNA Degradation Pathway
1628	0	NA	132	28	4h_MINCH_10nM_ctrlnoLPS	4h_ctrlnoLPS_pvalue	Inosine-5'-phosphate Biosynthesis II
1629	1.141692979	-2.065	152	23	4h_MINCH_10nM_ctrlnoLPS	4h_ctrlnoLPS_pvalue	Insulin Secretion Signaling Pathway
1630	0.766804625	-0.258	67	16	4h_MINCH_10nM_ctrlnoLPS	4h_ctrlnoLPS_pvalue	Integrin Signaling
1631	1.630149944	2.646	52	8	4h_MINCH_10nM_ctrlnoLPS	4h_ctrlnoLPS_pvalue	Interferon Signaling
1632	0.535835847	NA	156	28	4h_MINCH_10nM_ctrlnoLPS	4h_ctrlnoLPS_pvalue	Iron homeostasis signaling pathway
1633	1.828310674	-1	96	25	4h_MINCH_10nM_ctrlnoLPS	4h_ctrlnoLPS_pvalue	Isoleucine Degradation I
1634	0.492843578	-1.134	275	26	4h_MINCH_10nM_ctrlnoLPS	4h_ctrlnoLPS_pvalue	JAK/Stat Signaling
1635	0.518645718	NA	87	28	4h_MINCH_10nM_ctrlnoLPS	4h_ctrlnoLPS_pvalue	Ketogenesis
1636	0.632141054	NA	193	28	4h_MINCH_10nM_ctrlnoLPS	4h_ctrlnoLPS_pvalue	Ketolysis
1637	0.387801319	NA	48	28	4h_MINCH_10nM_ctrlnoLPS	4h_ctrlnoLPS_pvalue	L-cysteine Degradation I
1638	0.579868353	NA	172	28	4h_MINCH_10nM_ctrlnoLPS	4h_ctrlnoLPS_pvalue	Leucine Degradation I
1639	1.753626542	0	166	16	4h_MINCH_10nM_ctrlnoLPS	4h_ctrlnoLPS_pvalue	Leukocyte Extravasation Signaling
1640	1.860535584	NA	106	28	4h_MINCH_10nM_ctrlnoLPS	4h_ctrlnoLPS_pvalue	Lipid Antigen Presentation by CD1
1641	0.238053051	0	248	20	4h_MINCH_10nM_ctrlnoLPS	4h_ctrlnoLPS_pvalue	LPS/IL-1 Mediated Inhibition of RXR Function
1642	0.580288447	-0.378	93	18	4h_MINCH_10nM_ctrlnoLPS	4h_ctrlnoLPS_pvalue	LXR/RXR Activation
1643	0.579868353	-1.342	264	23	4h_MINCH_10nM_ctrlnoLPS	4h_ctrlnoLPS_pvalue	Macropinocytosis Signaling
1644	0.666600518	NA	174	28	4h_MINCH_10nM_ctrlnoLPS	4h_ctrlnoLPS_pvalue	Mechanisms of Viral Exit from Host Cells
1645	0.683563789	-1.134	170	27	4h_MINCH_10nM_ctrlnoLPS	4h_ctrlnoLPS_pvalue	Melatonin Signaling
1646	0.420592009	NA	200	28	4h_MINCH_10nM_ctrlnoLPS	4h_ctrlnoLPS_pvalue	Methylglyoxal Degradation III
1647	1.401926648	NA	216	28	4h_MINCH_10nM_ctrlnoLPS	4h_ctrlnoLPS_pvalue	Mevalonate Pathway I
1648	0.182263382	NA	220	28	4h_MINCH_10nM_ctrlnoLPS	4h_ctrlnoLPS_pvalue	MIF-mediated Glucocorticoid Regulation
1649	0.144459672	NA	203	28	4h_MINCH_10nM_ctrlnoLPS	4h_ctrlnoLPS_pvalue	Mismatch Repair in Eukaryotes
1650	6.078164502	NA	169	28	4h_MINCH_10nM_ctrlnoLPS	4h_ctrlnoLPS_pvalue	Mitochondrial Dysfunction
1651	0.171199275	NA	161	28	4h_MINCH_10nM_ctrlnoLPS	4h_ctrlnoLPS_pvalue	Mitochondrial L-carnitine Shuttle Pathway
1652	0.770555006	NA	103	28	4h_MINCH_10nM_ctrlnoLPS	4h_ctrlnoLPS_pvalue	Mitotic Roles of Polo-Like Kinase
1653	2.155424272	-0.333	55	26	4h_MINCH_10nM_ctrlnoLPS	4h_ctrlnoLPS_pvalue	mTOR Signaling
1654	0.352068287	NA	80	28	4h_MINCH_10nM_ctrlnoLPS	4h_ctrlnoLPS_pvalue	Myo-inositol Biosynthesis
1655	0.683563789	-1.807	74	12	4h_MINCH_10nM_ctrlnoLPS	4h_ctrlnoLPS_pvalue	Natural Killer Cell Signaling
1656	1.755551614	-0.243	86	25	4h_MINCH_10nM_ctrlnoLPS	4h_ctrlnoLPS_pvalue	Necroptosis Signaling Pathway
1657	0.327408863	0	142	20	4h_MINCH_10nM_ctrlnoLPS	4h_ctrlnoLPS_pvalue	NER Pathway
1658	0	NA	217	28	4h_MINCH_10nM_ctrlnoLPS	4h_ctrlnoLPS_pvalue	Netrin Signaling
1659	0.383701839	-2.236	65	23	4h_MINCH_10nM_ctrlnoLPS	4h_ctrlnoLPS_pvalue	Neuregulin Signaling
1660	0.223093637	NA	215	28	4h_MINCH_10nM_ctrlnoLPS	4h_ctrlnoLPS_pvalue	nNOS Signaling in Neurons
1661	3.133681481	-1.941	6	12	4h_MINCH_10nM_ctrlnoLPS	4h_ctrlnoLPS_pvalue	NRF2-mediated Oxidative Stress Response
1662	0.898926353	-0.816	288	26	4h_MINCH_10nM_ctrlnoLPS	4h_ctrlnoLPS_pvalue	Oncostatin M Signaling
1663	0.872369377	-2.524	88	4	4h_MINCH_10nM_ctrlnoLPS	4h_ctrlnoLPS_pvalue	Opioid Signaling Pathway
1664	0.171199275	NA	112	28	4h_MINCH_10nM_ctrlnoLPS	4h_ctrlnoLPS_pvalue	Oxidative Ethanol Degradation III
1665	4.458571339	2.065	13	1	4h_MINCH_10nM_ctrlnoLPS	4h_ctrlnoLPS_pvalue	Oxidative Phosphorylation
1666	1.155455633	NA	179	28	4h_MINCH_10nM_ctrlnoLPS	4h_ctrlnoLPS_pvalue	Oxidized GTP and dGTP Detoxification
1667	0.683563789	-1.265	277	27	4h_MINCH_10nM_ctrlnoLPS	4h_ctrlnoLPS_pvalue	P2Y Purigenic Receptor Signaling Pathway
1668	1.134217316	-2.111	51	23	4h_MINCH_10nM_ctrlnoLPS	4h_ctrlnoLPS_pvalue	p70S6K Signaling
1669	1.360344152	-0.632	14	14	4h_MINCH_10nM_ctrlnoLPS	4h_ctrlnoLPS_pvalue	PAK Signaling
1670	0.770555006	-0.632	9	13	4h_MINCH_10nM_ctrlnoLPS	4h_ctrlnoLPS_pvalue	Paxillin Signaling
1671	2.617158461	-0.447	241	20	4h_MINCH_10nM_ctrlnoLPS	4h_ctrlnoLPS_pvalue	Pentose Phosphate Pathway
1672	0.770555006	NA	194	28	4h_MINCH_10nM_ctrlnoLPS	4h_ctrlnoLPS_pvalue	Pentose Phosphate Pathway (Non-oxidative Branch)
1673	2.034276971	NA	205	28	4h_MINCH_10nM_ctrlnoLPS	4h_ctrlnoLPS_pvalue	Pentose Phosphate Pathway (Oxidative Branch)
1674	0.827623071	-0.816	256	27	4h_MINCH_10nM_ctrlnoLPS	4h_ctrlnoLPS_pvalue	PFKFB4 Signaling Pathway
1675	0.184856345	NA	168	28	4h_MINCH_10nM_ctrlnoLPS	4h_ctrlnoLPS_pvalue	Phagosome Formation
1676	4.711965638	NA	189	28	4h_MINCH_10nM_ctrlnoLPS	4h_ctrlnoLPS_pvalue	Phagosome Maturation
1677	0.898926353	NA	100	28	4h_MINCH_10nM_ctrlnoLPS	4h_ctrlnoLPS_pvalue	Phenylalanine Degradation IV (Mammalian, via Side Chain)
1678	0.467872343	-1.069	292	27	4h_MINCH_10nM_ctrlnoLPS	4h_ctrlnoLPS_pvalue	Phospholipase C Signaling
1679	0.951438172	-1.155	249	23	4h_MINCH_10nM_ctrlnoLPS	4h_ctrlnoLPS_pvalue	PI3K Signaling in B Lymphocytes
1680	0.827623071	-1.807	61	6	4h_MINCH_10nM_ctrlnoLPS	4h_ctrlnoLPS_pvalue	PI3K/AKT Signaling
1681	0.198053224	-1.414	181	23	4h_MINCH_10nM_ctrlnoLPS	4h_ctrlnoLPS_pvalue	PKC? Signaling in T Lymphocytes
1682	0.352068287	0.378	135	17	4h_MINCH_10nM_ctrlnoLPS	4h_ctrlnoLPS_pvalue	PPAR Signaling
1683	0.827623071	-0.832	289	18	4h_MINCH_10nM_ctrlnoLPS	4h_ctrlnoLPS_pvalue	PPAR?/RXR? Activation
1684	0.185017088	NA	122	28	4h_MINCH_10nM_ctrlnoLPS	4h_ctrlnoLPS_pvalue	Pregnenolone Biosynthesis
1685	1.413714609	0.5	261	28	4h_MINCH_10nM_ctrlnoLPS	4h_ctrlnoLPS_pvalue	Production of Nitric Oxide and Reactive Oxygen Species in Macrophages
1686	0.481404699	-1.633	46	26	4h_MINCH_10nM_ctrlnoLPS	4h_ctrlnoLPS_pvalue	Prolactin Signaling
1687	0.286875609	NA	197	28	4h_MINCH_10nM_ctrlnoLPS	4h_ctrlnoLPS_pvalue	Prostate Cancer Signaling
1688	1.180706295	-2.132	62	6	4h_MINCH_10nM_ctrlnoLPS	4h_ctrlnoLPS_pvalue	Protein Kinase A Signaling
1689	6.316378135	NA	138	28	4h_MINCH_10nM_ctrlnoLPS	4h_ctrlnoLPS_pvalue	Protein Ubiquitination Pathway
1690	0.683563789	2.111	25	10	4h_MINCH_10nM_ctrlnoLPS	4h_ctrlnoLPS_pvalue	PTEN Signaling
1691	0	NA	236	29	4h_MINCH_10nM_ctrlnoLPS	4h_ctrlnoLPS_pvalue	Purine Nucleotides De Novo Biosynthesis II
1692	0.770555006	NA	141	28	4h_MINCH_10nM_ctrlnoLPS	4h_ctrlnoLPS_pvalue	Purine Ribonucleosides Degradation to Ribose-1-phosphate
1693	0.535835847	NA	223	28	4h_MINCH_10nM_ctrlnoLPS	4h_ctrlnoLPS_pvalue	Pyrimidine Deoxyribonucleotides De Novo Biosynthesis I
1694	0.635147008	0.447	257	29	4h_MINCH_10nM_ctrlnoLPS	4h_ctrlnoLPS_pvalue	Pyrimidine Ribonucleotides De Novo Biosynthesis
1695	0.992949514	NA	127	28	4h_MINCH_10nM_ctrlnoLPS	4h_ctrlnoLPS_pvalue	Pyruvate Fermentation to Lactate
1696	2.497960697	0	49	14	4h_MINCH_10nM_ctrlnoLPS	4h_ctrlnoLPS_pvalue	Rac Signaling
1697	0.144459672	NA	224	25	4h_MINCH_10nM_ctrlnoLPS	4h_ctrlnoLPS_pvalue	RAN Signaling
1698	0.185017088	0.447	231	28	4h_MINCH_10nM_ctrlnoLPS	4h_ctrlnoLPS_pvalue	RANK Signaling in Osteoclasts
1699	0.387801319	NA	151	28	4h_MINCH_10nM_ctrlnoLPS	4h_ctrlnoLPS_pvalue	Rapoport-Luebering Glycolytic Shunt
1700	0.688913261	-1	77	13	4h_MINCH_10nM_ctrlnoLPS	4h_ctrlnoLPS_pvalue	Reelin Signaling in Neurons
1701	1.665920682	1	32	16	4h_MINCH_10nM_ctrlnoLPS	4h_ctrlnoLPS_pvalue	Regulation of Actin-based Motility by Rho
1702	2.266458195	-1.134	34	23	4h_MINCH_10nM_ctrlnoLPS	4h_ctrlnoLPS_pvalue	Regulation of Cellular Mechanics by Calpain Protease
1703	5.553475953	-1.265	268	23	4h_MINCH_10nM_ctrlnoLPS	4h_ctrlnoLPS_pvalue	Regulation of eIF4 and p70S6K Signaling
1704	0.555198447	NA	105	28	4h_MINCH_10nM_ctrlnoLPS	4h_ctrlnoLPS_pvalue	Regulation of IL-2 Expression in Activated and Anergic T Lymphocytes
1705	1.360344152	NA	263	26	4h_MINCH_10nM_ctrlnoLPS	4h_ctrlnoLPS_pvalue	Remodeling of Epithelial Adherens Junctions
1706	0.535835847	-2	97	12	4h_MINCH_10nM_ctrlnoLPS	4h_ctrlnoLPS_pvalue	Renal Cell Carcinoma Signaling
1707	0.616914326	-1	70	14	4h_MINCH_10nM_ctrlnoLPS	4h_ctrlnoLPS_pvalue	Renin-Angiotensin Signaling
1708	0.898926353	-0.302	11	13	4h_MINCH_10nM_ctrlnoLPS	4h_ctrlnoLPS_pvalue	RhoA Signaling
1709	1.031718664	-1.508	134	22	4h_MINCH_10nM_ctrlnoLPS	4h_ctrlnoLPS_pvalue	RhoGDI Signaling
1710	0.898926353	NA	199	28	4h_MINCH_10nM_ctrlnoLPS	4h_ctrlnoLPS_pvalue	Role of IL-17A in Psoriasis
1711	0.238053051	NA	225	29	4h_MINCH_10nM_ctrlnoLPS	4h_ctrlnoLPS_pvalue	Role of IL-17F in Allergic Inflammatory Airway Diseases
1712	0.496584182	NA	124	28	4h_MINCH_10nM_ctrlnoLPS	4h_ctrlnoLPS_pvalue	Role of JAK1, JAK2 and TYK2 in Interferon Signaling
1713	0.707153479	-1.807	137	12	4h_MINCH_10nM_ctrlnoLPS	4h_ctrlnoLPS_pvalue	Role of NFAT in Cardiac Hypertrophy
1714	0.3263556	-1.414	265	27	4h_MINCH_10nM_ctrlnoLPS	4h_ctrlnoLPS_pvalue	Role of NFAT in Regulation of the Immune Response
1715	0.171199275	NA	258	27	4h_MINCH_10nM_ctrlnoLPS	4h_ctrlnoLPS_pvalue	Role of PI3K/AKT Signaling in the Pathogenesis of Influenza
1716	1.021369075	3.317	22	3	4h_MINCH_10nM_ctrlnoLPS	4h_ctrlnoLPS_pvalue	Role of PKR in Interferon Induction and Antiviral Response
1717	0.3263556	NA	230	29	4h_MINCH_10nM_ctrlnoLPS	4h_ctrlnoLPS_pvalue	Role of RIG1-like Receptors in Antiviral Innate Immunity
1718	0.49639116	NA	158	28	4h_MINCH_10nM_ctrlnoLPS	4h_ctrlnoLPS_pvalue	Role of Tissue Factor in Cancer
1719	0.529998715	NA	121	28	4h_MINCH_10nM_ctrlnoLPS	4h_ctrlnoLPS_pvalue	S-adenosyl-L-methionine Biosynthesis
1720	0.3263556	NA	123	28	4h_MINCH_10nM_ctrlnoLPS	4h_ctrlnoLPS_pvalue	Selenocysteine Biosynthesis II (Archaea and Eukaryotes)
1721	0.680464998	1.897	7	10	4h_MINCH_10nM_ctrlnoLPS	4h_ctrlnoLPS_pvalue	Semaphorin Neuronal Repulsive Signaling Pathway
1722	0.492843578	NA	131	28	4h_MINCH_10nM_ctrlnoLPS	4h_ctrlnoLPS_pvalue	Semaphorin Signaling in Neurons
1723	0.564550639	-0.688	120	18	4h_MINCH_10nM_ctrlnoLPS	4h_ctrlnoLPS_pvalue	Senescence Pathway
1724	2.034276971	NA	94	28	4h_MINCH_10nM_ctrlnoLPS	4h_ctrlnoLPS_pvalue	Serine Biosynthesis
1725	0.352068287	NA	125	28	4h_MINCH_10nM_ctrlnoLPS	4h_ctrlnoLPS_pvalue	Sertoli Cell-Sertoli Cell Junction Signaling
1726	1.946890421	0.471	119	13	4h_MINCH_10nM_ctrlnoLPS	4h_ctrlnoLPS_pvalue	Signaling by Rho Family GTPases
1727	7.158056519	-1.89	36	4	4h_MINCH_10nM_ctrlnoLPS	4h_ctrlnoLPS_pvalue	Sirtuin Signaling Pathway
1728	0	0	259	28	4h_MINCH_10nM_ctrlnoLPS	4h_ctrlnoLPS_pvalue	Sphingosine-1-phosphate Signaling
1729	5.390985032	-2.673	18	2	4h_MINCH_10nM_ctrlnoLPS	4h_ctrlnoLPS_pvalue	Spliceosomal Cycle
1730	0.238053051	NA	232	28	4h_MINCH_10nM_ctrlnoLPS	4h_ctrlnoLPS_pvalue	Stearate Biosynthesis I (Animals)
1731	2.103614854	1	244	29	4h_MINCH_10nM_ctrlnoLPS	4h_ctrlnoLPS_pvalue	Sucrose Degradation V (Mammalian)
1732	0.683563789	NA	187	28	4h_MINCH_10nM_ctrlnoLPS	4h_ctrlnoLPS_pvalue	Sulfate Activation for Sulfonation
1733	0.34793463	-0.816	296	20	4h_MINCH_10nM_ctrlnoLPS	4h_ctrlnoLPS_pvalue	Sumoylation Pathway
1734	1.199797	NA	245	26	4h_MINCH_10nM_ctrlnoLPS	4h_ctrlnoLPS_pvalue	Superoxide Radicals Degradation
1735	1.013695636	0	246	25	4h_MINCH_10nM_ctrlnoLPS	4h_ctrlnoLPS_pvalue	Superpathway of Cholesterol Biosynthesis
1736	0.954669334	NA	234	28	4h_MINCH_10nM_ctrlnoLPS	4h_ctrlnoLPS_pvalue	Superpathway of Citrulline Metabolism
1737	1.107816684	NA	238	19	4h_MINCH_10nM_ctrlnoLPS	4h_ctrlnoLPS_pvalue	Superpathway of Geranylgeranyldiphosphate Biosynthesis I (via Mevalonate)
1738	0.454412189	0.832	3	11	4h_MINCH_10nM_ctrlnoLPS	4h_ctrlnoLPS_pvalue	Superpathway of Inositol Phosphate Compounds
1739	0.579868353	-2	27	15	4h_MINCH_10nM_ctrlnoLPS	4h_ctrlnoLPS_pvalue	Superpathway of Methionine Degradation
1740	2.556690673	-2	235	23	4h_MINCH_10nM_ctrlnoLPS	4h_ctrlnoLPS_pvalue	Superpathway of Serine and Glycine Biosynthesis I
1741	0.563653947	-3.162	4	7	4h_MINCH_10nM_ctrlnoLPS	4h_ctrlnoLPS_pvalue	Synaptic Long Term Potentiation
1742	0.769845898	-1.789	12	12	4h_MINCH_10nM_ctrlnoLPS	4h_ctrlnoLPS_pvalue	Synaptogenesis Signaling Pathway
1743	0.424599348	-0.243	54	19	4h_MINCH_10nM_ctrlnoLPS	4h_ctrlnoLPS_pvalue	Systemic Lupus Erythematosus In B Cell Signaling Pathway
1744	0.385264037	0.535	276	26	4h_MINCH_10nM_ctrlnoLPS	4h_ctrlnoLPS_pvalue	Systemic Lupus Erythematosus In T Cell Signaling Pathway
1745	0.863907656	NA	126	28	4h_MINCH_10nM_ctrlnoLPS	4h_ctrlnoLPS_pvalue	Systemic Lupus Erythematosus Signaling
1746	0.305644876	NA	47	28	4h_MINCH_10nM_ctrlnoLPS	4h_ctrlnoLPS_pvalue	T Cell Receptor Signaling
1747	1.379457904	-0.447	28	14	4h_MINCH_10nM_ctrlnoLPS	4h_ctrlnoLPS_pvalue	TCA Cycle II (Eukaryotic)
1748	0.535835847	1.414	8	11	4h_MINCH_10nM_ctrlnoLPS	4h_ctrlnoLPS_pvalue	Tec Kinase Signaling
1749	0.448005468	-1.414	285	27	4h_MINCH_10nM_ctrlnoLPS	4h_ctrlnoLPS_pvalue	Telomerase Signaling
1750	0.743939384	NA	196	28	4h_MINCH_10nM_ctrlnoLPS	4h_ctrlnoLPS_pvalue	Telomere Extension by Telomerase
1751	0	NA	175	28	4h_MINCH_10nM_ctrlnoLPS	4h_ctrlnoLPS_pvalue	Tetrahydrofolate Salvage from 5,10-methenyltetrahydrofolate
1752	0.993279519	-1.732	82	12	4h_MINCH_10nM_ctrlnoLPS	4h_ctrlnoLPS_pvalue	Thrombin Signaling
1753	0.527863188	-1.633	41	26	4h_MINCH_10nM_ctrlnoLPS	4h_ctrlnoLPS_pvalue	Thrombopoietin Signaling
1754	0.683563789	NA	148	28	4h_MINCH_10nM_ctrlnoLPS	4h_ctrlnoLPS_pvalue	Thyroid Hormone Biosynthesis
1755	1.860535584	NA	118	28	4h_MINCH_10nM_ctrlnoLPS	4h_ctrlnoLPS_pvalue	Tight Junction Signaling
1756	0.666600518	1.134	5	11	4h_MINCH_10nM_ctrlnoLPS	4h_ctrlnoLPS_pvalue	TREM1 Signaling
1757	7.158056519	-2.84	68	4	4h_MINCH_10nM_ctrlnoLPS	4h_ctrlnoLPS_pvalue	tRNA Charging
1758	0.818803026	NA	284	29	4h_MINCH_10nM_ctrlnoLPS	4h_ctrlnoLPS_pvalue	Tryptophan Degradation III (Eukaryotic)
1759	0.3263556	NA	90	28	4h_MINCH_10nM_ctrlnoLPS	4h_ctrlnoLPS_pvalue	Tryptophan Degradation to 2-amino-3-carboxymuconate Semialdehyde
1760	0.157557129	NA	136	28	4h_MINCH_10nM_ctrlnoLPS	4h_ctrlnoLPS_pvalue	Ubiquinol-10 Biosynthesis (Eukaryotic)
1761	0.3263556	NA	79	28	4h_MINCH_10nM_ctrlnoLPS	4h_ctrlnoLPS_pvalue	UDP-N-acetyl-D-glucosamine Biosynthesis II
1762	3.076968289	-3	33	6	4h_MINCH_10nM_ctrlnoLPS	4h_ctrlnoLPS_pvalue	Unfolded protein response
1763	0.872369377	NA	98	28	4h_MINCH_10nM_ctrlnoLPS	4h_ctrlnoLPS_pvalue	Urea Cycle
1764	0	NA	91	28	4h_MINCH_10nM_ctrlnoLPS	4h_ctrlnoLPS_pvalue	Uridine-5'-phosphate Biosynthesis
1765	0.366502844	-1	281	23	4h_MINCH_10nM_ctrlnoLPS	4h_ctrlnoLPS_pvalue	UVA-Induced MAPK Signaling
1766	0.992949514	0	242	25	4h_MINCH_10nM_ctrlnoLPS	4h_ctrlnoLPS_pvalue	Valine Degradation I
1767	2.155424272	-1.265	63	12	4h_MINCH_10nM_ctrlnoLPS	4h_ctrlnoLPS_pvalue	VEGF Signaling
1768	2.746239096	NA	157	28	4h_MINCH_10nM_ctrlnoLPS	4h_ctrlnoLPS_pvalue	Virus Entry via Endocytic Pathways
1769	0	NA	146	28	4h_MINCH_10nM_ctrlnoLPS	4h_ctrlnoLPS_pvalue	Vitamin-C Transport
1770	0.149867153	NA	240	28	4h_MINCH_10nM_ctrlnoLPS	4h_ctrlnoLPS_pvalue	Wnt/Ca+ pathway
1771	0.683563789	NA	167	28	4h_MINCH_10nM_ctrlnoLPS	4h_ctrlnoLPS_pvalue	Xanthine and Xanthosine Salvage
1772	1.106334826	0.333	50	22	4h_MINCH_10nM_ctrlnoLPS	4h_ctrlnoLPS_pvalue	Xenobiotic Metabolism AHR Signaling Pathway
1773	0.564719083	0	159	18	4h_MINCH_10nM_ctrlnoLPS	4h_ctrlnoLPS_pvalue	Xenobiotic Metabolism CAR Signaling Pathway
1774	0.529998715	1.155	78	11	4h_MINCH_10nM_ctrlnoLPS	4h_ctrlnoLPS_pvalue	Xenobiotic Metabolism PXR Signaling Pathway
1775	1.180706295	NA	37	28	4h_MINCH_10nM_ctrlnoLPS	4h_ctrlnoLPS_pvalue	Xenobiotic Metabolism Signaling
1776	0.3263556	NA	198	28	4h_MINCH_10nM_ctrlnoLPS	4h_ctrlnoLPS_pvalue	Zymosterol Biosynthesis
1777	0.675370916	-1.89	35	12	4h_MINCH_100nM_ctrlnoLPS	4h_ctrlnoLPS_pvalue	?-Adrenergic Signaling
1778	0.476057951	NA	164	28	4h_MINCH_100nM_ctrlnoLPS	4h_ctrlnoLPS_pvalue	?-glutamyl Cycle
1779	0.666840173	NA	221	29	4h_MINCH_100nM_ctrlnoLPS	4h_ctrlnoLPS_pvalue	?-linolenate Biosynthesis II (Animals)
1780	0.87677052	-3.317	26	7	4h_MINCH_100nM_ctrlnoLPS	4h_ctrlnoLPS_pvalue	14-3-3-mediated Signaling
1781	0.889593975	NA	211	28	4h_MINCH_100nM_ctrlnoLPS	4h_ctrlnoLPS_pvalue	2-ketoglutarate Dehydrogenase Complex
1782	0	1	57	11	4h_MINCH_100nM_ctrlnoLPS	4h_ctrlnoLPS_pvalue	3-phosphoinositide Biosynthesis
1783	0	NA	219	28	4h_MINCH_100nM_ctrlnoLPS	4h_ctrlnoLPS_pvalue	4-1BB Signaling in T Lymphocytes
1784	0.675370916	NA	110	28	4h_MINCH_100nM_ctrlnoLPS	4h_ctrlnoLPS_pvalue	Acetyl-CoA Biosynthesis I (Pyruvate Dehydrogenase Complex)
1785	0.628485009	NA	108	28	4h_MINCH_100nM_ctrlnoLPS	4h_ctrlnoLPS_pvalue	Acetyl-CoA Biosynthesis III (from Citrate)
1786	2.178057801	-0.853	58	16	4h_MINCH_100nM_ctrlnoLPS	4h_ctrlnoLPS_pvalue	Actin Cytoskeleton Signaling
1787	1.986998996	-0.905	81	13	4h_MINCH_100nM_ctrlnoLPS	4h_ctrlnoLPS_pvalue	Actin Nucleation by ARP-WASP Complex
1788	0.675370916	1.134	21	11	4h_MINCH_100nM_ctrlnoLPS	4h_ctrlnoLPS_pvalue	Activation of IRF by Cytosolic Pattern Recognition Receptors
1789	0.145194057	-0.447	267	23	4h_MINCH_100nM_ctrlnoLPS	4h_ctrlnoLPS_pvalue	Acute Myeloid Leukemia Signaling
1790	0.455411357	NA	180	28	4h_MINCH_100nM_ctrlnoLPS	4h_ctrlnoLPS_pvalue	Adenine and Adenosine Salvage I
1791	0.675370916	NA	117	28	4h_MINCH_100nM_ctrlnoLPS	4h_ctrlnoLPS_pvalue	Adenine and Adenosine Salvage III
1792	0	NA	165	28	4h_MINCH_100nM_ctrlnoLPS	4h_ctrlnoLPS_pvalue	Adenine and Adenosine Salvage VI
1793	0.476057951	NA	56	28	4h_MINCH_100nM_ctrlnoLPS	4h_ctrlnoLPS_pvalue	Agranulocyte Adhesion and Diapedesis
1794	0.28237773	-1.633	84	13	4h_MINCH_100nM_ctrlnoLPS	4h_ctrlnoLPS_pvalue	Agrin Interactions at Neuromuscular Junction
1795	0.655915511	NA	233	28	4h_MINCH_100nM_ctrlnoLPS	4h_ctrlnoLPS_pvalue	Aldosterone Signaling in Epithelial Cells
1796	0	NA	64	24	4h_MINCH_100nM_ctrlnoLPS	4h_ctrlnoLPS_pvalue	Amyloid Processing
1797	0.303718727	-0.816	286	20	4h_MINCH_100nM_ctrlnoLPS	4h_ctrlnoLPS_pvalue	Angiopoietin Signaling
1798	1.232561173	NA	72	28	4h_MINCH_100nM_ctrlnoLPS	4h_ctrlnoLPS_pvalue	Antigen Presentation Pathway
1799	0.19983359	0	270	27	4h_MINCH_100nM_ctrlnoLPS	4h_ctrlnoLPS_pvalue	Antioxidant Action of Vitamin C
1800	0.288402308	-1	279	27	4h_MINCH_100nM_ctrlnoLPS	4h_ctrlnoLPS_pvalue	Antiproliferative Role of Somatostatin Receptor 2
1801	1.013687169	-0.632	280	26	4h_MINCH_100nM_ctrlnoLPS	4h_ctrlnoLPS_pvalue	Apelin Adipocyte Signaling Pathway
1802	0.759608294	-1.265	278	20	4h_MINCH_100nM_ctrlnoLPS	4h_ctrlnoLPS_pvalue	Apelin Cardiomyocyte Signaling Pathway
1803	0.108621765	-1.134	287	27	4h_MINCH_100nM_ctrlnoLPS	4h_ctrlnoLPS_pvalue	Apelin Endothelial Signaling Pathway
1804	0.455411357	0.333	293	28	4h_MINCH_100nM_ctrlnoLPS	4h_ctrlnoLPS_pvalue	Apoptosis Signaling
1805	0.762038085	NA	85	28	4h_MINCH_100nM_ctrlnoLPS	4h_ctrlnoLPS_pvalue	Arginine Biosynthesis IV
1806	0.889593975	NA	101	28	4h_MINCH_100nM_ctrlnoLPS	4h_ctrlnoLPS_pvalue	Arsenate Detoxification I (Glutaredoxin)
1807	2.543206491	0.632	253	28	4h_MINCH_100nM_ctrlnoLPS	4h_ctrlnoLPS_pvalue	Aryl Hydrocarbon Receptor Signaling
1808	0.628485009	NA	207	28	4h_MINCH_100nM_ctrlnoLPS	4h_ctrlnoLPS_pvalue	Asparagine Biosynthesis I
1809	0.363897517	NA	195	28	4h_MINCH_100nM_ctrlnoLPS	4h_ctrlnoLPS_pvalue	Aspartate Biosynthesis
1810	1.376598708	NA	128	28	4h_MINCH_100nM_ctrlnoLPS	4h_ctrlnoLPS_pvalue	Aspartate Degradation II
1811	0.455411357	NA	149	28	4h_MINCH_100nM_ctrlnoLPS	4h_ctrlnoLPS_pvalue	Atherosclerosis Signaling
1812	0.455411357	-0.447	19	18	4h_MINCH_100nM_ctrlnoLPS	4h_ctrlnoLPS_pvalue	ATM Signaling
1813	1.057401767	NA	143	28	4h_MINCH_100nM_ctrlnoLPS	4h_ctrlnoLPS_pvalue	Autophagy
1814	0	NA	42	28	4h_MINCH_100nM_ctrlnoLPS	4h_ctrlnoLPS_pvalue	Axonal Guidance Signaling
1815	0.110310648	-1.265	177	12	4h_MINCH_100nM_ctrlnoLPS	4h_ctrlnoLPS_pvalue	B Cell Receptor Signaling
1816	2.610122139	-1.897	76	4	4h_MINCH_100nM_ctrlnoLPS	4h_ctrlnoLPS_pvalue	BAG2 Signaling Pathway
1817	0.363897517	NA	206	28	4h_MINCH_100nM_ctrlnoLPS	4h_ctrlnoLPS_pvalue	BER pathway
1818	0	NA	113	28	4h_MINCH_100nM_ctrlnoLPS	4h_ctrlnoLPS_pvalue	Bile Acid Biosynthesis, Neutral Pathway
1819	0.889593975	NA	144	28	4h_MINCH_100nM_ctrlnoLPS	4h_ctrlnoLPS_pvalue	Branched-chain ?-keto acid Dehydrogenase Complex
1820	0.382436122	0	243	28	4h_MINCH_100nM_ctrlnoLPS	4h_ctrlnoLPS_pvalue	Calcium-induced T Lymphocyte Apoptosis
1821	0.233823652	0	290	25	4h_MINCH_100nM_ctrlnoLPS	4h_ctrlnoLPS_pvalue	Cardiac Hypertrophy Signaling
1822	3.833547492	NA	204	28	4h_MINCH_100nM_ctrlnoLPS	4h_ctrlnoLPS_pvalue	Caveolar-mediated Endocytosis Signaling
1823	0.706930535	-2	89	12	4h_MINCH_100nM_ctrlnoLPS	4h_ctrlnoLPS_pvalue	CCR3 Signaling in Eosinophils
1824	0	NA	260	27	4h_MINCH_100nM_ctrlnoLPS	4h_ctrlnoLPS_pvalue	CD27 Signaling in Lymphocytes
1825	0.366449789	-0.707	182	27	4h_MINCH_100nM_ctrlnoLPS	4h_ctrlnoLPS_pvalue	CD28 Signaling in T Helper Cells
1826	0	NA	251	29	4h_MINCH_100nM_ctrlnoLPS	4h_ctrlnoLPS_pvalue	CD40 Signaling
1827	1.881480919	-1.604	73	13	4h_MINCH_100nM_ctrlnoLPS	4h_ctrlnoLPS_pvalue	Cdc42 Signaling
1828	0.156016867	-1.633	59	12	4h_MINCH_100nM_ctrlnoLPS	4h_ctrlnoLPS_pvalue	CDK5 Signaling
1829	0.31274423	-0.447	10	21	4h_MINCH_100nM_ctrlnoLPS	4h_ctrlnoLPS_pvalue	Cell Cycle Control of Chromosomal Replication
1830	2.530669623	0.378	218	28	4h_MINCH_100nM_ctrlnoLPS	4h_ctrlnoLPS_pvalue	Cell Cycle: G2/M DNA Damage Checkpoint Regulation
1831	0.28237773	-1.134	291	27	4h_MINCH_100nM_ctrlnoLPS	4h_ctrlnoLPS_pvalue	Ceramide Signaling
1832	0.557562715	-1.414	271	20	4h_MINCH_100nM_ctrlnoLPS	4h_ctrlnoLPS_pvalue	Chemokine Signaling
1833	0.310245123	-1	163	26	4h_MINCH_100nM_ctrlnoLPS	4h_ctrlnoLPS_pvalue	Cholecystokinin/Gastrin-mediated Signaling
1834	0.706930535	NA	115	28	4h_MINCH_100nM_ctrlnoLPS	4h_ctrlnoLPS_pvalue	Cholesterol Biosynthesis I
1835	0.706930535	NA	176	28	4h_MINCH_100nM_ctrlnoLPS	4h_ctrlnoLPS_pvalue	Cholesterol Biosynthesis II (via 24,25-dihydrolanosterol)
1836	0.706930535	NA	95	28	4h_MINCH_100nM_ctrlnoLPS	4h_ctrlnoLPS_pvalue	Cholesterol Biosynthesis III (via Desmosterol)
1837	0	NA	145	28	4h_MINCH_100nM_ctrlnoLPS	4h_ctrlnoLPS_pvalue	Chronic Myeloid Leukemia Signaling
1838	0.762038085	NA	140	28	4h_MINCH_100nM_ctrlnoLPS	4h_ctrlnoLPS_pvalue	Citrulline-Nitric Oxide Cycle
1839	0.762038085	NA	130	28	4h_MINCH_100nM_ctrlnoLPS	4h_ctrlnoLPS_pvalue	Citrulline Biosynthesis
1840	3.549795863	NA	190	28	4h_MINCH_100nM_ctrlnoLPS	4h_ctrlnoLPS_pvalue	Clathrin-mediated Endocytosis Signaling
1841	0.866866098	1.291	83	17	4h_MINCH_100nM_ctrlnoLPS	4h_ctrlnoLPS_pvalue	Coronavirus Pathogenesis Pathway
1842	0.31274423	NA	173	28	4h_MINCH_100nM_ctrlnoLPS	4h_ctrlnoLPS_pvalue	Creatine-phosphate Biosynthesis
1843	0.369819692	-3.162	75	7	4h_MINCH_100nM_ctrlnoLPS	4h_ctrlnoLPS_pvalue	CREB Signaling in Neurons
1844	1.376598708	NA	114	28	4h_MINCH_100nM_ctrlnoLPS	4h_ctrlnoLPS_pvalue	CTLA4 Signaling in Cytotoxic T Lymphocytes
1845	0.590330748	-1.387	40	27	4h_MINCH_100nM_ctrlnoLPS	4h_ctrlnoLPS_pvalue	CXCR4 Signaling
1846	0	0.707	39	11	4h_MINCH_100nM_ctrlnoLPS	4h_ctrlnoLPS_pvalue	D-myo-inositol-5-phosphate Metabolism
1847	0	NA	29	24	4h_MINCH_100nM_ctrlnoLPS	4h_ctrlnoLPS_pvalue	D-myo-inositol (1,4,5)-Trisphosphate Biosynthesis
1848	0.110310648	0.707	147	11	4h_MINCH_100nM_ctrlnoLPS	4h_ctrlnoLPS_pvalue	D-myo-inositol (1,4,5,6)-Tetrakisphosphate Biosynthesis
1849	0.110310648	0.707	133	11	4h_MINCH_100nM_ctrlnoLPS	4h_ctrlnoLPS_pvalue	D-myo-inositol (3,4,5,6)-tetrakisphosphate Biosynthesis
1850	0.258942281	0.378	255	28	4h_MINCH_100nM_ctrlnoLPS	4h_ctrlnoLPS_pvalue	Death Receptor Signaling
1851	1.136821982	NA	208	28	4h_MINCH_100nM_ctrlnoLPS	4h_ctrlnoLPS_pvalue	DNA Double-Strand Break Repair by Non-Homologous End Joining
1852	0.744721971	-1	226	20	4h_MINCH_100nM_ctrlnoLPS	4h_ctrlnoLPS_pvalue	Dopamine Degradation
1853	10.5633778	0.756	20	5	4h_MINCH_100nM_ctrlnoLPS	4h_ctrlnoLPS_pvalue	EIF2 Signaling
1854	0.111620984	-1.89	23	20	4h_MINCH_100nM_ctrlnoLPS	4h_ctrlnoLPS_pvalue	Endocannabinoid Neuronal Synapse Pathway
1855	0.762038085	-1	222	20	4h_MINCH_100nM_ctrlnoLPS	4h_ctrlnoLPS_pvalue	Endoplasmic Reticulum Stress Pathway
1856	0.64158504	-1	184	20	4h_MINCH_100nM_ctrlnoLPS	4h_ctrlnoLPS_pvalue	Ephrin B Signaling
1857	0.543317269	-2.84	1	7	4h_MINCH_100nM_ctrlnoLPS	4h_ctrlnoLPS_pvalue	Ephrin Receptor Signaling
1858	1.271171469	NA	192	28	4h_MINCH_100nM_ctrlnoLPS	4h_ctrlnoLPS_pvalue	Epithelial Adherens Junction Signaling
1859	0.530299218	-0.905	31	19	4h_MINCH_100nM_ctrlnoLPS	4h_ctrlnoLPS_pvalue	ERK/MAPK Signaling
1860	0.233823652	NA	186	28	4h_MINCH_100nM_ctrlnoLPS	4h_ctrlnoLPS_pvalue	Erythropoietin Signaling
1861	0.312719432	0	229	28	4h_MINCH_100nM_ctrlnoLPS	4h_ctrlnoLPS_pvalue	Estrogen-Dependent Breast Cancer Signaling
1862	0.280096654	NA	295	22	4h_MINCH_100nM_ctrlnoLPS	4h_ctrlnoLPS_pvalue	Estrogen Biosynthesis
1863	1.986998996	0	273	26	4h_MINCH_100nM_ctrlnoLPS	4h_ctrlnoLPS_pvalue	Estrogen Receptor Signaling
1864	0.880192512	-1	227	20	4h_MINCH_100nM_ctrlnoLPS	4h_ctrlnoLPS_pvalue	Ethanol Degradation IV
1865	0.340013533	NA	154	28	4h_MINCH_100nM_ctrlnoLPS	4h_ctrlnoLPS_pvalue	FAK Signaling
1866	0.539073259	NA	237	26	4h_MINCH_100nM_ctrlnoLPS	4h_ctrlnoLPS_pvalue	FAT10 Signaling Pathway
1867	1.323759675	0	247	26	4h_MINCH_100nM_ctrlnoLPS	4h_ctrlnoLPS_pvalue	Fatty Acid ?-oxidation I
1868	0.889593975	NA	104	28	4h_MINCH_100nM_ctrlnoLPS	4h_ctrlnoLPS_pvalue	Fatty Acid Activation
1869	0.644053262	-1.897	53	16	4h_MINCH_100nM_ctrlnoLPS	4h_ctrlnoLPS_pvalue	Fc? Receptor-mediated Phagocytosis in Macrophages and Monocytes
1870	0.206849455	0	102	19	4h_MINCH_100nM_ctrlnoLPS	4h_ctrlnoLPS_pvalue	FLT3 Signaling in Hematopoietic Progenitor Cells
1871	1.726986939	-1.291	15	13	4h_MINCH_100nM_ctrlnoLPS	4h_ctrlnoLPS_pvalue	fMLP Signaling in Neutrophils
1872	0.27010394	NA	178	28	4h_MINCH_100nM_ctrlnoLPS	4h_ctrlnoLPS_pvalue	Folate Polyglutamylation
1873	0.604581322	-1.897	71	6	4h_MINCH_100nM_ctrlnoLPS	4h_ctrlnoLPS_pvalue	G Beta Gamma Signaling
1874	0.312719432	NA	109	28	4h_MINCH_100nM_ctrlnoLPS	4h_ctrlnoLPS_pvalue	G Protein Signaling Mediated by Tubby
1875	0.28237773	0	262	28	4h_MINCH_100nM_ctrlnoLPS	4h_ctrlnoLPS_pvalue	G?q Signaling
1876	0.762038085	NA	201	28	4h_MINCH_100nM_ctrlnoLPS	4h_ctrlnoLPS_pvalue	Galactose Degradation I (Leloir Pathway)
1877	0.111190607	NA	209	28	4h_MINCH_100nM_ctrlnoLPS	4h_ctrlnoLPS_pvalue	Gap Junction Signaling
1878	0	NA	254	23	4h_MINCH_100nM_ctrlnoLPS	4h_ctrlnoLPS_pvalue	GDNF Family Ligand-Receptor Interactions
1879	0.476057951	NA	213	28	4h_MINCH_100nM_ctrlnoLPS	4h_ctrlnoLPS_pvalue	GDP-glucose Biosynthesis
1880	1.510928392	NA	191	28	4h_MINCH_100nM_ctrlnoLPS	4h_ctrlnoLPS_pvalue	Germ Cell-Sertoli Cell Junction Signaling
1881	0	-1.667	111	23	4h_MINCH_100nM_ctrlnoLPS	4h_ctrlnoLPS_pvalue	Glioblastoma Multiforme Signaling
1882	0.663503401	0.707	43	26	4h_MINCH_100nM_ctrlnoLPS	4h_ctrlnoLPS_pvalue	Glioma Invasiveness Signaling
1883	0.31830364	-2.121	38	12	4h_MINCH_100nM_ctrlnoLPS	4h_ctrlnoLPS_pvalue	Glioma Signaling
1884	0.966995654	NA	188	28	4h_MINCH_100nM_ctrlnoLPS	4h_ctrlnoLPS_pvalue	Glucocorticoid Receptor Signaling
1885	3.118190288	0.707	2	9	4h_MINCH_100nM_ctrlnoLPS	4h_ctrlnoLPS_pvalue	Gluconeogenesis I
1886	0.476057951	NA	214	28	4h_MINCH_100nM_ctrlnoLPS	4h_ctrlnoLPS_pvalue	Glucose and Glucose-1-phosphate Degradation
1887	0.363897517	NA	212	28	4h_MINCH_100nM_ctrlnoLPS	4h_ctrlnoLPS_pvalue	Glutamate Degradation II
1888	0.628485009	NA	66	28	4h_MINCH_100nM_ctrlnoLPS	4h_ctrlnoLPS_pvalue	Glutamate Removal from Folates
1889	0.628485009	NA	185	28	4h_MINCH_100nM_ctrlnoLPS	4h_ctrlnoLPS_pvalue	Glutamine Degradation I
1890	0.28237773	NA	266	13	4h_MINCH_100nM_ctrlnoLPS	4h_ctrlnoLPS_pvalue	Glutaryl-CoA Degradation
1891	2.530669623	-0.378	228	20	4h_MINCH_100nM_ctrlnoLPS	4h_ctrlnoLPS_pvalue	Glutathione-mediated Detoxification
1892	1.337147522	0.447	155	11	4h_MINCH_100nM_ctrlnoLPS	4h_ctrlnoLPS_pvalue	Glutathione Redox Reactions I
1893	0.31274423	NA	153	28	4h_MINCH_100nM_ctrlnoLPS	4h_ctrlnoLPS_pvalue	Glutathione Redox Reactions II
1894	0.233823652	NA	210	28	4h_MINCH_100nM_ctrlnoLPS	4h_ctrlnoLPS_pvalue	Glycine Cleavage Complex
1895	0.233823652	NA	171	28	4h_MINCH_100nM_ctrlnoLPS	4h_ctrlnoLPS_pvalue	Glycogen Biosynthesis II (from UDP-D-Glucose)
1896	0.992775954	NA	92	11	4h_MINCH_100nM_ctrlnoLPS	4h_ctrlnoLPS_pvalue	Glycogen Degradation II
1897	1.4331576	1	45	11	4h_MINCH_100nM_ctrlnoLPS	4h_ctrlnoLPS_pvalue	Glycogen Degradation III
1898	2.396460341	2.646	24	3	4h_MINCH_100nM_ctrlnoLPS	4h_ctrlnoLPS_pvalue	Glycolysis I
1899	0.628485009	-2.121	16	12	4h_MINCH_100nM_ctrlnoLPS	4h_ctrlnoLPS_pvalue	GM-CSF Signaling
1900	0.38610662	-3.051	17	7	4h_MINCH_100nM_ctrlnoLPS	4h_ctrlnoLPS_pvalue	GNRH Signaling
1901	0.118813512	1	250	27	4h_MINCH_100nM_ctrlnoLPS	4h_ctrlnoLPS_pvalue	GPCR-Mediated Integration of Enteroendocrine Signaling Exemplified by an L Cell
1902	1.057401767	NA	150	28	4h_MINCH_100nM_ctrlnoLPS	4h_ctrlnoLPS_pvalue	Granzyme A Signaling
1903	1.00304167	-1	252	22	4h_MINCH_100nM_ctrlnoLPS	4h_ctrlnoLPS_pvalue	Granzyme B Signaling
1904	1.380336551	NA	107	28	4h_MINCH_100nM_ctrlnoLPS	4h_ctrlnoLPS_pvalue	Guanine and Guanosine Salvage I
1905	0.889593975	NA	129	28	4h_MINCH_100nM_ctrlnoLPS	4h_ctrlnoLPS_pvalue	Heme Biosynthesis from Uroporphyrinogen-III I
1906	0.889593975	NA	99	28	4h_MINCH_100nM_ctrlnoLPS	4h_ctrlnoLPS_pvalue	Heme Degradation
1907	1.230780566	0.655	30	9	4h_MINCH_100nM_ctrlnoLPS	4h_ctrlnoLPS_pvalue	HIF1? Signaling
1908	1.4331576	2.828	44	10	4h_MINCH_100nM_ctrlnoLPS	4h_ctrlnoLPS_pvalue	HIPPO signaling
1909	0.232764229	0.302	139	26	4h_MINCH_100nM_ctrlnoLPS	4h_ctrlnoLPS_pvalue	HMGB1 Signaling
1910	2.877884823	-0.707	294	22	4h_MINCH_100nM_ctrlnoLPS	4h_ctrlnoLPS_pvalue	Huntington's Disease Signaling
1911	0.779557747	NA	162	28	4h_MINCH_100nM_ctrlnoLPS	4h_ctrlnoLPS_pvalue	Hypoxia Signaling in the Cardiovascular System
1912	0	NA	116	28	4h_MINCH_100nM_ctrlnoLPS	4h_ctrlnoLPS_pvalue	Hypusine Biosynthesis
1913	0.339984673	0.378	283	27	4h_MINCH_100nM_ctrlnoLPS	4h_ctrlnoLPS_pvalue	iCOS-iCOSL Signaling in T Helper Cells
1914	0.368521999	NA	272	27	4h_MINCH_100nM_ctrlnoLPS	4h_ctrlnoLPS_pvalue	IGF-1 Signaling
1915	0.28237773	NA	160	28	4h_MINCH_100nM_ctrlnoLPS	4h_ctrlnoLPS_pvalue	IL-12 Signaling and Production in Macrophages
1916	0.118888098	0.447	269	26	4h_MINCH_100nM_ctrlnoLPS	4h_ctrlnoLPS_pvalue	IL-15 Signaling
1917	0.31830364	-0.378	282	23	4h_MINCH_100nM_ctrlnoLPS	4h_ctrlnoLPS_pvalue	IL-3 Signaling
1918	0.455411357	NA	202	28	4h_MINCH_100nM_ctrlnoLPS	4h_ctrlnoLPS_pvalue	IL-4 Signaling
1919	1.357712609	-0.894	183	27	4h_MINCH_100nM_ctrlnoLPS	4h_ctrlnoLPS_pvalue	IL-8 Signaling
1920	0.220152203	NA	274	26	4h_MINCH_100nM_ctrlnoLPS	4h_ctrlnoLPS_pvalue	IL-9 Signaling
1921	1.119230822	0	69	13	4h_MINCH_100nM_ctrlnoLPS	4h_ctrlnoLPS_pvalue	ILK Signaling
1922	0.455411357	NA	239	28	4h_MINCH_100nM_ctrlnoLPS	4h_ctrlnoLPS_pvalue	Inflammasome pathway
1923	1.057401767	-2.138	60	7	4h_MINCH_100nM_ctrlnoLPS	4h_ctrlnoLPS_pvalue	Inhibition of ARE-Mediated mRNA Degradation Pathway
1924	0	NA	132	28	4h_MINCH_100nM_ctrlnoLPS	4h_ctrlnoLPS_pvalue	Inosine-5'-phosphate Biosynthesis II
1925	1.726986939	-1.633	152	23	4h_MINCH_100nM_ctrlnoLPS	4h_ctrlnoLPS_pvalue	Insulin Secretion Signaling Pathway
1926	2.343870638	-1.225	67	16	4h_MINCH_100nM_ctrlnoLPS	4h_ctrlnoLPS_pvalue	Integrin Signaling
1927	1.342558941	1.89	52	8	4h_MINCH_100nM_ctrlnoLPS	4h_ctrlnoLPS_pvalue	Interferon Signaling
1928	1.00304167	NA	156	28	4h_MINCH_100nM_ctrlnoLPS	4h_ctrlnoLPS_pvalue	Iron homeostasis signaling pathway
1929	1.00304167	NA	96	25	4h_MINCH_100nM_ctrlnoLPS	4h_ctrlnoLPS_pvalue	Isoleucine Degradation I
1930	0.31274423	0.378	275	26	4h_MINCH_100nM_ctrlnoLPS	4h_ctrlnoLPS_pvalue	JAK/Stat Signaling
1931	0.114368023	NA	87	28	4h_MINCH_100nM_ctrlnoLPS	4h_ctrlnoLPS_pvalue	Ketogenesis
1932	0.165599818	NA	193	28	4h_MINCH_100nM_ctrlnoLPS	4h_ctrlnoLPS_pvalue	Ketolysis
1933	0.31274423	NA	48	28	4h_MINCH_100nM_ctrlnoLPS	4h_ctrlnoLPS_pvalue	L-cysteine Degradation I
1934	0.476057951	NA	172	28	4h_MINCH_100nM_ctrlnoLPS	4h_ctrlnoLPS_pvalue	Leucine Degradation I
1935	0.767533878	-1	166	16	4h_MINCH_100nM_ctrlnoLPS	4h_ctrlnoLPS_pvalue	Leukocyte Extravasation Signaling
1936	2.178057801	NA	106	28	4h_MINCH_100nM_ctrlnoLPS	4h_ctrlnoLPS_pvalue	Lipid Antigen Presentation by CD1
1937	0.946020961	-0.447	248	20	4h_MINCH_100nM_ctrlnoLPS	4h_ctrlnoLPS_pvalue	LPS/IL-1 Mediated Inhibition of RXR Function
1938	0.162970469	-1.633	93	18	4h_MINCH_100nM_ctrlnoLPS	4h_ctrlnoLPS_pvalue	LXR/RXR Activation
1939	0.400649131	-1	264	23	4h_MINCH_100nM_ctrlnoLPS	4h_ctrlnoLPS_pvalue	Macropinocytosis Signaling
1940	0.762038085	NA	174	28	4h_MINCH_100nM_ctrlnoLPS	4h_ctrlnoLPS_pvalue	Mechanisms of Viral Exit from Host Cells
1941	0.313224637	-0.816	170	27	4h_MINCH_100nM_ctrlnoLPS	4h_ctrlnoLPS_pvalue	Melatonin Signaling
1942	0.086623655	NA	200	28	4h_MINCH_100nM_ctrlnoLPS	4h_ctrlnoLPS_pvalue	Methylglyoxal Degradation III
1943	0.100611346	NA	216	28	4h_MINCH_100nM_ctrlnoLPS	4h_ctrlnoLPS_pvalue	Mevalonate Pathway I
1944	0.247868108	NA	220	28	4h_MINCH_100nM_ctrlnoLPS	4h_ctrlnoLPS_pvalue	MIF-mediated Glucocorticoid Regulation
1945	0.058085077	NA	203	28	4h_MINCH_100nM_ctrlnoLPS	4h_ctrlnoLPS_pvalue	Mismatch Repair in Eukaryotes
1946	4.718373328	NA	169	28	4h_MINCH_100nM_ctrlnoLPS	4h_ctrlnoLPS_pvalue	Mitochondrial Dysfunction
1947	0.666840173	NA	161	28	4h_MINCH_100nM_ctrlnoLPS	4h_ctrlnoLPS_pvalue	Mitochondrial L-carnitine Shuttle Pathway
1948	0.777227866	NA	103	28	4h_MINCH_100nM_ctrlnoLPS	4h_ctrlnoLPS_pvalue	Mitotic Roles of Polo-Like Kinase
1949	0.867563041	-0.333	55	26	4h_MINCH_100nM_ctrlnoLPS	4h_ctrlnoLPS_pvalue	mTOR Signaling
1950	0.27010394	NA	80	28	4h_MINCH_100nM_ctrlnoLPS	4h_ctrlnoLPS_pvalue	Myo-inositol Biosynthesis
1951	0.31274423	-2.673	74	12	4h_MINCH_100nM_ctrlnoLPS	4h_ctrlnoLPS_pvalue	Natural Killer Cell Signaling
1952	0.281625465	-0.905	86	25	4h_MINCH_100nM_ctrlnoLPS	4h_ctrlnoLPS_pvalue	Necroptosis Signaling Pathway
1953	0.281625465	-0.816	142	20	4h_MINCH_100nM_ctrlnoLPS	4h_ctrlnoLPS_pvalue	NER Pathway
1954	0	NA	217	28	4h_MINCH_100nM_ctrlnoLPS	4h_ctrlnoLPS_pvalue	Netrin Signaling
1955	0.47074993	-1.342	65	23	4h_MINCH_100nM_ctrlnoLPS	4h_ctrlnoLPS_pvalue	Neuregulin Signaling
1956	0.114368023	NA	215	28	4h_MINCH_100nM_ctrlnoLPS	4h_ctrlnoLPS_pvalue	nNOS Signaling in Neurons
1957	2.648352794	-2.138	6	12	4h_MINCH_100nM_ctrlnoLPS	4h_ctrlnoLPS_pvalue	NRF2-mediated Oxidative Stress Response
1958	0.706930535	0	288	26	4h_MINCH_100nM_ctrlnoLPS	4h_ctrlnoLPS_pvalue	Oncostatin M Signaling
1959	0.762038085	-1.789	88	4	4h_MINCH_100nM_ctrlnoLPS	4h_ctrlnoLPS_pvalue	Opioid Signaling Pathway
1960	0.666840173	NA	112	28	4h_MINCH_100nM_ctrlnoLPS	4h_ctrlnoLPS_pvalue	Oxidative Ethanol Degradation III
1961	3.530832614	2.524	13	1	4h_MINCH_100nM_ctrlnoLPS	4h_ctrlnoLPS_pvalue	Oxidative Phosphorylation
1962	2.302728254	NA	179	28	4h_MINCH_100nM_ctrlnoLPS	4h_ctrlnoLPS_pvalue	Oxidized GTP and dGTP Detoxification
1963	0.313224637	-0.333	277	27	4h_MINCH_100nM_ctrlnoLPS	4h_ctrlnoLPS_pvalue	P2Y Purigenic Receptor Signaling Pathway
1964	1.523201363	-1.265	51	23	4h_MINCH_100nM_ctrlnoLPS	4h_ctrlnoLPS_pvalue	p70S6K Signaling
1965	0.402646168	-1.89	14	14	4h_MINCH_100nM_ctrlnoLPS	4h_ctrlnoLPS_pvalue	PAK Signaling
1966	0.898113487	-2.333	9	13	4h_MINCH_100nM_ctrlnoLPS	4h_ctrlnoLPS_pvalue	Paxillin Signaling
1967	1.553717219	-1	241	20	4h_MINCH_100nM_ctrlnoLPS	4h_ctrlnoLPS_pvalue	Pentose Phosphate Pathway
1968	0.233823652	NA	194	28	4h_MINCH_100nM_ctrlnoLPS	4h_ctrlnoLPS_pvalue	Pentose Phosphate Pathway (Non-oxidative Branch)
1969	1.881480919	NA	205	28	4h_MINCH_100nM_ctrlnoLPS	4h_ctrlnoLPS_pvalue	Pentose Phosphate Pathway (Oxidative Branch)
1970	0.247526227	0	256	27	4h_MINCH_100nM_ctrlnoLPS	4h_ctrlnoLPS_pvalue	PFKFB4 Signaling Pathway
1971	0.31830364	NA	168	28	4h_MINCH_100nM_ctrlnoLPS	4h_ctrlnoLPS_pvalue	Phagosome Formation
1972	8.21131006	NA	189	28	4h_MINCH_100nM_ctrlnoLPS	4h_ctrlnoLPS_pvalue	Phagosome Maturation
1973	0.762038085	NA	100	28	4h_MINCH_100nM_ctrlnoLPS	4h_ctrlnoLPS_pvalue	Phenylalanine Degradation IV (Mammalian, via Side Chain)
1974	0.31274423	-0.535	292	27	4h_MINCH_100nM_ctrlnoLPS	4h_ctrlnoLPS_pvalue	Phospholipase C Signaling
1975	0.363897517	-0.302	249	23	4h_MINCH_100nM_ctrlnoLPS	4h_ctrlnoLPS_pvalue	PI3K Signaling in B Lymphocytes
1976	1.00304167	-2.828	61	6	4h_MINCH_100nM_ctrlnoLPS	4h_ctrlnoLPS_pvalue	PI3K/AKT Signaling
1977	0	-0.707	181	23	4h_MINCH_100nM_ctrlnoLPS	4h_ctrlnoLPS_pvalue	PKC? Signaling in T Lymphocytes
1978	0.591149513	1.265	135	17	4h_MINCH_100nM_ctrlnoLPS	4h_ctrlnoLPS_pvalue	PPAR Signaling
1979	0.666840173	0.277	289	18	4h_MINCH_100nM_ctrlnoLPS	4h_ctrlnoLPS_pvalue	PPAR?/RXR? Activation
1980	0.110310648	NA	122	28	4h_MINCH_100nM_ctrlnoLPS	4h_ctrlnoLPS_pvalue	Pregnenolone Biosynthesis
1981	0.633218391	1	261	28	4h_MINCH_100nM_ctrlnoLPS	4h_ctrlnoLPS_pvalue	Production of Nitric Oxide and Reactive Oxygen Species in Macrophages
1982	0.455411357	-0.816	46	26	4h_MINCH_100nM_ctrlnoLPS	4h_ctrlnoLPS_pvalue	Prolactin Signaling
1983	0.363897517	NA	197	28	4h_MINCH_100nM_ctrlnoLPS	4h_ctrlnoLPS_pvalue	Prostate Cancer Signaling
1984	0.675370916	-1.877	62	6	4h_MINCH_100nM_ctrlnoLPS	4h_ctrlnoLPS_pvalue	Protein Kinase A Signaling
1985	9.045844783	NA	138	28	4h_MINCH_100nM_ctrlnoLPS	4h_ctrlnoLPS_pvalue	Protein Ubiquitination Pathway
1986	0.233823652	2.333	25	10	4h_MINCH_100nM_ctrlnoLPS	4h_ctrlnoLPS_pvalue	PTEN Signaling
1987	0.400649131	NA	236	29	4h_MINCH_100nM_ctrlnoLPS	4h_ctrlnoLPS_pvalue	Purine Nucleotides De Novo Biosynthesis II
1988	0.675370916	NA	141	28	4h_MINCH_100nM_ctrlnoLPS	4h_ctrlnoLPS_pvalue	Purine Ribonucleosides Degradation to Ribose-1-phosphate
1989	0.421699133	NA	223	28	4h_MINCH_100nM_ctrlnoLPS	4h_ctrlnoLPS_pvalue	Pyrimidine Deoxyribonucleotides De Novo Biosynthesis I
1990	0.47074993	-0.447	257	29	4h_MINCH_100nM_ctrlnoLPS	4h_ctrlnoLPS_pvalue	Pyrimidine Ribonucleotides De Novo Biosynthesis
1991	0.31274423	NA	127	28	4h_MINCH_100nM_ctrlnoLPS	4h_ctrlnoLPS_pvalue	Pyruvate Fermentation to Lactate
1992	1.553717219	-1.291	49	14	4h_MINCH_100nM_ctrlnoLPS	4h_ctrlnoLPS_pvalue	Rac Signaling
1993	0.588530372	NA	224	25	4h_MINCH_100nM_ctrlnoLPS	4h_ctrlnoLPS_pvalue	RAN Signaling
1994	0	NA	231	28	4h_MINCH_100nM_ctrlnoLPS	4h_ctrlnoLPS_pvalue	RANK Signaling in Osteoclasts
1995	0.31274423	NA	151	28	4h_MINCH_100nM_ctrlnoLPS	4h_ctrlnoLPS_pvalue	Rapoport-Luebering Glycolytic Shunt
1996	0.455411357	-1.897	77	13	4h_MINCH_100nM_ctrlnoLPS	4h_ctrlnoLPS_pvalue	Reelin Signaling in Neurons
1997	2.877884823	-0.277	32	16	4h_MINCH_100nM_ctrlnoLPS	4h_ctrlnoLPS_pvalue	Regulation of Actin-based Motility by Rho
1998	1.4331576	-1.633	34	23	4h_MINCH_100nM_ctrlnoLPS	4h_ctrlnoLPS_pvalue	Regulation of Cellular Mechanics by Calpain Protease
1999	2.005706331	-0.816	268	23	4h_MINCH_100nM_ctrlnoLPS	4h_ctrlnoLPS_pvalue	Regulation of eIF4 and p70S6K Signaling
[truncated: 6,596 more rows]
