# Supplementary material for: The Emerging Plasticizer Alternative DINCH and Its Metabolite MINCH Induce Oxidative Stress and Enhance Inflammatory Responses in Human THP-1 Macrophages
Source: Cells. 2021 Sep 9;10(9):2367. doi: 10.3390/cells10092367 (PMC8466537; doi:10.3390/cells10092367)
Supplement: Supplementary file 1 [file cells-10-02367-s001.zip › Supplement 8.csv]

	pvalue	zscore	Order	Cluster	Treatment	Module	Pathway
1	0.32758399	NA	221	18	4h_DINCH_1_ctrlLPS	4h_ctrlLPS_pvalue	?-Adrenergic Signaling
2	1.071777461	NA	138	21	4h_DINCH_1_ctrlLPS	4h_ctrlLPS_pvalue	?-glutamyl Cycle
3	0.205725824	NA	11	8	4h_DINCH_1_ctrlLPS	4h_ctrlLPS_pvalue	14-3-3-mediated Signaling
4	0.339595386	NA	194	21	4h_DINCH_1_ctrlLPS	4h_ctrlLPS_pvalue	2-ketoglutarate Dehydrogenase Complex
5	0	NA	130	21	4h_DINCH_1_ctrlLPS	4h_ctrlLPS_pvalue	Acetyl-CoA Biosynthesis I (Pyruvate Dehydrogenase Complex)
6	0	NA	160	21	4h_DINCH_1_ctrlLPS	4h_ctrlLPS_pvalue	Acetyl-CoA Biosynthesis III (from Citrate)
7	0.463406868	-1.667	2	3	4h_DINCH_1_ctrlLPS	4h_ctrlLPS_pvalue	Actin Cytoskeleton Signaling
8	0.164027046	NA	114	15	4h_DINCH_1_ctrlLPS	4h_ctrlLPS_pvalue	Actin Nucleation by ARP-WASP Complex
9	0.463406868	NA	154	21	4h_DINCH_1_ctrlLPS	4h_ctrlLPS_pvalue	Acyl Carrier Protein Metabolism
10	0.463406868	NA	150	21	4h_DINCH_1_ctrlLPS	4h_ctrlLPS_pvalue	Adenine and Adenosine Salvage VI
11	0.205103008	NA	28	21	4h_DINCH_1_ctrlLPS	4h_ctrlLPS_pvalue	Agranulocyte Adhesion and Diapedesis
12	0.391820528	NA	147	21	4h_DINCH_1_ctrlLPS	4h_ctrlLPS_pvalue	Aldosterone Signaling in Epithelial Cells
13	0.30878171	0.378	60	16	4h_DINCH_1_ctrlLPS	4h_ctrlLPS_pvalue	AMPK Signaling
14	0.421177181	NA	171	21	4h_DINCH_1_ctrlLPS	4h_ctrlLPS_pvalue	Amyloid Processing
15	0	NA	199	18	4h_DINCH_1_ctrlLPS	4h_ctrlLPS_pvalue	Angiopoietin Signaling
16	0.339595386	NA	32	21	4h_DINCH_1_ctrlLPS	4h_ctrlLPS_pvalue	Antigen Presentation Pathway
17	0.421177181	-1	75	19	4h_DINCH_1_ctrlLPS	4h_ctrlLPS_pvalue	Antiproliferative Role of Somatostatin Receptor 2
18	0	NA	116	22	4h_DINCH_1_ctrlLPS	4h_ctrlLPS_pvalue	Antiproliferative Role of TOB in T Cell Signaling
19	0.278810951	0	71	14	4h_DINCH_1_ctrlLPS	4h_ctrlLPS_pvalue	Apelin Adipocyte Signaling Pathway
20	0	NA	69	12	4h_DINCH_1_ctrlLPS	4h_ctrlLPS_pvalue	Apelin Cardiomyocyte Signaling Pathway
21	0.463406868	0	214	21	4h_DINCH_1_ctrlLPS	4h_ctrlLPS_pvalue	Apoptosis Signaling
22	0.310374716	NA	131	21	4h_DINCH_1_ctrlLPS	4h_ctrlLPS_pvalue	Arginine Biosynthesis IV
23	0.421177181	1.89	68	11	4h_DINCH_1_ctrlLPS	4h_ctrlLPS_pvalue	Aryl Hydrocarbon Receptor Signaling
24	0.29128652	NA	140	21	4h_DINCH_1_ctrlLPS	4h_ctrlLPS_pvalue	Aspartate Degradation II
25	0.287063353	NA	26	21	4h_DINCH_1_ctrlLPS	4h_ctrlLPS_pvalue	Axonal Guidance Signaling
26	0.742504321	-1.342	9	6	4h_DINCH_1_ctrlLPS	4h_ctrlLPS_pvalue	BAG2 Signaling Pathway
27	0	NA	190	21	4h_DINCH_1_ctrlLPS	4h_ctrlLPS_pvalue	BER pathway
28	0	NA	151	21	4h_DINCH_1_ctrlLPS	4h_ctrlLPS_pvalue	Branched-chain ?-keto acid Dehydrogenase Complex
29	0	NA	201	21	4h_DINCH_1_ctrlLPS	4h_ctrlLPS_pvalue	Calcium-induced T Lymphocyte Apoptosis
30	0.463406868	NA	104	18	4h_DINCH_1_ctrlLPS	4h_ctrlLPS_pvalue	Calcium Signaling
31	0.357658126	NA	208	18	4h_DINCH_1_ctrlLPS	4h_ctrlLPS_pvalue	Cardiac ?-adrenergic Signaling
32	0.170896973	-0.378	58	21	4h_DINCH_1_ctrlLPS	4h_ctrlLPS_pvalue	Cardiac Hypertrophy Signaling
33	0.30878171	NA	188	21	4h_DINCH_1_ctrlLPS	4h_ctrlLPS_pvalue	Caveolar-mediated Endocytosis Signaling
34	0.208226627	NA	18	21	4h_DINCH_1_ctrlLPS	4h_ctrlLPS_pvalue	CCR3 Signaling in Eosinophils
35	0.10881392	0	112	19	4h_DINCH_1_ctrlLPS	4h_ctrlLPS_pvalue	CD28 Signaling in T Helper Cells
36	0.421177181	0	17	21	4h_DINCH_1_ctrlLPS	4h_ctrlLPS_pvalue	CD40 Signaling
37	0.099626922	-2	7	6	4h_DINCH_1_ctrlLPS	4h_ctrlLPS_pvalue	Cdc42 Signaling
38	0.099626922	NA	204	20	4h_DINCH_1_ctrlLPS	4h_ctrlLPS_pvalue	Cell Cycle Control of Chromosomal Replication
39	0	NA	31	21	4h_DINCH_1_ctrlLPS	4h_ctrlLPS_pvalue	Cell Cycle: G2/M DNA Damage Checkpoint Regulation
40	0.339595386	0.447	90	19	4h_DINCH_1_ctrlLPS	4h_ctrlLPS_pvalue	Ceramide Signaling
41	0	NA	92	19	4h_DINCH_1_ctrlLPS	4h_ctrlLPS_pvalue	Chemokine Signaling
42	0	NA	125	21	4h_DINCH_1_ctrlLPS	4h_ctrlLPS_pvalue	Chronic Myeloid Leukemia Signaling
43	0.310374716	NA	16	21	4h_DINCH_1_ctrlLPS	4h_ctrlLPS_pvalue	Citrulline Biosynthesis
44	0.463406868	NA	175	21	4h_DINCH_1_ctrlLPS	4h_ctrlLPS_pvalue	Clathrin-mediated Endocytosis Signaling
45	0.198722225	1.134	94	16	4h_DINCH_1_ctrlLPS	4h_ctrlLPS_pvalue	Colorectal Cancer Metastasis Signaling
46	4.004144048	1.886	1	1	4h_DINCH_1_ctrlLPS	4h_ctrlLPS_pvalue	Coronavirus Pathogenesis Pathway
47	0	NA	158	21	4h_DINCH_1_ctrlLPS	4h_ctrlLPS_pvalue	Crosstalk between Dendritic Cells and Natural Killer Cells
48	0.339595386	NA	127	21	4h_DINCH_1_ctrlLPS	4h_ctrlLPS_pvalue	CTLA4 Signaling in Cytotoxic T Lymphocytes
49	0.29266542	-0.447	43	19	4h_DINCH_1_ctrlLPS	4h_ctrlLPS_pvalue	CXCR4 Signaling
50	0.113836862	NA	22	21	4h_DINCH_1_ctrlLPS	4h_ctrlLPS_pvalue	Cysteine Biosynthesis III (mammalia)
51	0.044038974	NA	23	21	4h_DINCH_1_ctrlLPS	4h_ctrlLPS_pvalue	Cytotoxic T Lymphocyte-mediated Apoptosis of Target Cells
52	0	NA	183	21	4h_DINCH_1_ctrlLPS	4h_ctrlLPS_pvalue	D-mannose Degradation
53	0.330745127	-0.447	110	21	4h_DINCH_1_ctrlLPS	4h_ctrlLPS_pvalue	Death Receptor Signaling
54	0.151639674	NA	191	21	4h_DINCH_1_ctrlLPS	4h_ctrlLPS_pvalue	DNA Double-Strand Break Repair by Non-Homologous End Joining
55	0.100321499	NA	177	21	4h_DINCH_1_ctrlLPS	4h_ctrlLPS_pvalue	Dopamine Degradation
56	3.190338323	-2.828	4	2	4h_DINCH_1_ctrlLPS	4h_ctrlLPS_pvalue	EIF2 Signaling
57	0.332259522	NA	198	21	4h_DINCH_1_ctrlLPS	4h_ctrlLPS_pvalue	Endoplasmic Reticulum Stress Pathway
58	0.298446373	NA	217	17	4h_DINCH_1_ctrlLPS	4h_ctrlLPS_pvalue	Ephrin B Signaling
59	0.327871166	-0.378	46	5	4h_DINCH_1_ctrlLPS	4h_ctrlLPS_pvalue	Ephrin Receptor Signaling
60	0.339595386	NA	179	21	4h_DINCH_1_ctrlLPS	4h_ctrlLPS_pvalue	Epithelial Adherens Junction Signaling
61	0	0	99	19	4h_DINCH_1_ctrlLPS	4h_ctrlLPS_pvalue	ERK/MAPK Signaling
62	0	NA	83	15	4h_DINCH_1_ctrlLPS	4h_ctrlLPS_pvalue	ERK5 Signaling
63	0.060314347	NA	192	21	4h_DINCH_1_ctrlLPS	4h_ctrlLPS_pvalue	Estrogen Biosynthesis
64	0.276665219	0	93	19	4h_DINCH_1_ctrlLPS	4h_ctrlLPS_pvalue	Estrogen Receptor Signaling
65	0.29266542	NA	98	20	4h_DINCH_1_ctrlLPS	4h_ctrlLPS_pvalue	FAT10 Cancer Signaling Pathway
66	0.622412609	NA	205	16	4h_DINCH_1_ctrlLPS	4h_ctrlLPS_pvalue	FAT10 Signaling Pathway
67	0.688553601	-1	38	19	4h_DINCH_1_ctrlLPS	4h_ctrlLPS_pvalue	Fatty Acid ?-oxidation I
68	0.082642862	NA	12	9	4h_DINCH_1_ctrlLPS	4h_ctrlLPS_pvalue	Fc? Receptor-mediated Phagocytosis in Macrophages and Monocytes
69	0.421177181	-0.816	108	7	4h_DINCH_1_ctrlLPS	4h_ctrlLPS_pvalue	fMLP Signaling in Neutrophils
70	0	NA	166	21	4h_DINCH_1_ctrlLPS	4h_ctrlLPS_pvalue	Folate Polyglutamylation
71	0	NA	10	21	4h_DINCH_1_ctrlLPS	4h_ctrlLPS_pvalue	Folate Transformations I
72	0.421177181	NA	128	21	4h_DINCH_1_ctrlLPS	4h_ctrlLPS_pvalue	G Protein Signaling Mediated by Tubby
73	0.205725824	0.447	45	20	4h_DINCH_1_ctrlLPS	4h_ctrlLPS_pvalue	G?q Signaling
74	0.421177181	NA	178	21	4h_DINCH_1_ctrlLPS	4h_ctrlLPS_pvalue	Germ Cell-Sertoli Cell Junction Signaling
75	0	NA	101	18	4h_DINCH_1_ctrlLPS	4h_ctrlLPS_pvalue	Glioma Invasiveness Signaling
76	0.332259522	NA	172	21	4h_DINCH_1_ctrlLPS	4h_ctrlLPS_pvalue	Glucocorticoid Receptor Signaling
77	0.327871166	NA	102	13	4h_DINCH_1_ctrlLPS	4h_ctrlLPS_pvalue	Gluconeogenesis I
78	0.608242334	NA	118	21	4h_DINCH_1_ctrlLPS	4h_ctrlLPS_pvalue	Glutamate Receptor Signaling
79	0	NA	62	21	4h_DINCH_1_ctrlLPS	4h_ctrlLPS_pvalue	Glutamate Removal from Folates
80	0.463406868	NA	169	21	4h_DINCH_1_ctrlLPS	4h_ctrlLPS_pvalue	Glutamine Degradation I
81	0.132400933	NA	215	17	4h_DINCH_1_ctrlLPS	4h_ctrlLPS_pvalue	Glutaryl-CoA Degradation
82	0	NA	207	21	4h_DINCH_1_ctrlLPS	4h_ctrlLPS_pvalue	Glutathione-mediated Detoxification
83	1.011389507	NA	126	21	4h_DINCH_1_ctrlLPS	4h_ctrlLPS_pvalue	Glutathione Biosynthesis
84	0.113836862	NA	195	21	4h_DINCH_1_ctrlLPS	4h_ctrlLPS_pvalue	Glutathione Redox Reactions I
85	0.339595386	NA	27	21	4h_DINCH_1_ctrlLPS	4h_ctrlLPS_pvalue	Glutathione Redox Reactions II
86	0	NA	193	21	4h_DINCH_1_ctrlLPS	4h_ctrlLPS_pvalue	Glycine Cleavage Complex
87	0.421177181	NA	167	21	4h_DINCH_1_ctrlLPS	4h_ctrlLPS_pvalue	Glycine Degradation (Creatine Biosynthesis)
88	0.29128652	NA	148	21	4h_DINCH_1_ctrlLPS	4h_ctrlLPS_pvalue	Glycogen Biosynthesis II (from UDP-D-Glucose)
89	0.327871166	NA	56	13	4h_DINCH_1_ctrlLPS	4h_ctrlLPS_pvalue	Glycolysis I
90	0	NA	40	18	4h_DINCH_1_ctrlLPS	4h_ctrlLPS_pvalue	GM-CSF Signaling
91	0.371014588	NA	153	21	4h_DINCH_1_ctrlLPS	4h_ctrlLPS_pvalue	Granzyme A Signaling
92	0.362009028	NA	139	21	4h_DINCH_1_ctrlLPS	4h_ctrlLPS_pvalue	Granzyme B Signaling
93	0.229427763	NA	196	21	4h_DINCH_1_ctrlLPS	4h_ctrlLPS_pvalue	Heme Biosynthesis II
94	0	-0.447	85	19	4h_DINCH_1_ctrlLPS	4h_ctrlLPS_pvalue	HIF1? Signaling
95	0.227191999	NA	52	20	4h_DINCH_1_ctrlLPS	4h_ctrlLPS_pvalue	HIPPO signaling
96	0.688553601	1	107	11	4h_DINCH_1_ctrlLPS	4h_ctrlLPS_pvalue	Huntington's Disease Signaling
97	0.40839666	NA	159	21	4h_DINCH_1_ctrlLPS	4h_ctrlLPS_pvalue	Hypoxia Signaling in the Cardiovascular System
98	0.146666561	NA	64	18	4h_DINCH_1_ctrlLPS	4h_ctrlLPS_pvalue	IGF-1 Signaling
99	0.563381737	NA	176	21	4h_DINCH_1_ctrlLPS	4h_ctrlLPS_pvalue	IL-10 Signaling
100	0.276665219	0	117	20	4h_DINCH_1_ctrlLPS	4h_ctrlLPS_pvalue	IL-15 Signaling
101	0.330745127	0	213	20	4h_DINCH_1_ctrlLPS	4h_ctrlLPS_pvalue	IL-17A Signaling in Airway Cells
102	0.303809532	NA	49	20	4h_DINCH_1_ctrlLPS	4h_ctrlLPS_pvalue	IL-23 Signaling Pathway
103	0	NA	72	20	4h_DINCH_1_ctrlLPS	4h_ctrlLPS_pvalue	IL-3 Signaling
104	0.421177181	-1.414	5	5	4h_DINCH_1_ctrlLPS	4h_ctrlLPS_pvalue	IL-8 Signaling
105	0.339595386	-0.707	96	7	4h_DINCH_1_ctrlLPS	4h_ctrlLPS_pvalue	ILK Signaling
106	1.071777461	-0.378	35	19	4h_DINCH_1_ctrlLPS	4h_ctrlLPS_pvalue	Induction of Apoptosis by HIV1
107	0.472839438	NA	134	21	4h_DINCH_1_ctrlLPS	4h_ctrlLPS_pvalue	Inflammasome pathway
108	0.688553601	-0.333	89	12	4h_DINCH_1_ctrlLPS	4h_ctrlLPS_pvalue	Inhibition of ARE-Mediated mRNA Degradation Pathway
109	0.421177181	NA	30	21	4h_DINCH_1_ctrlLPS	4h_ctrlLPS_pvalue	iNOS Signaling
110	0.41850815	-1.508	84	12	4h_DINCH_1_ctrlLPS	4h_ctrlLPS_pvalue	Insulin Secretion Signaling Pathway
111	0.152857724	0	105	15	4h_DINCH_1_ctrlLPS	4h_ctrlLPS_pvalue	Integrin Signaling
112	0.362009028	NA	203	20	4h_DINCH_1_ctrlLPS	4h_ctrlLPS_pvalue	Interferon Signaling
113	0.952788728	NA	143	21	4h_DINCH_1_ctrlLPS	4h_ctrlLPS_pvalue	Iron homeostasis signaling pathway
114	0	NA	74	17	4h_DINCH_1_ctrlLPS	4h_ctrlLPS_pvalue	Isoleucine Degradation I
115	0.357658126	0.447	95	20	4h_DINCH_1_ctrlLPS	4h_ctrlLPS_pvalue	JAK/Stat Signaling
116	0	NA	202	21	4h_DINCH_1_ctrlLPS	4h_ctrlLPS_pvalue	Ketogenesis
117	0	NA	180	21	4h_DINCH_1_ctrlLPS	4h_ctrlLPS_pvalue	Ketolysis
118	0.339595386	NA	182	21	4h_DINCH_1_ctrlLPS	4h_ctrlLPS_pvalue	Lactose Degradation III
119	0	NA	163	21	4h_DINCH_1_ctrlLPS	4h_ctrlLPS_pvalue	Leucine Degradation I
120	0.421177181	-0.707	57	5	4h_DINCH_1_ctrlLPS	4h_ctrlLPS_pvalue	Leukocyte Extravasation Signaling
121	0.295429203	NA	41	21	4h_DINCH_1_ctrlLPS	4h_ctrlLPS_pvalue	Lipid Antigen Presentation by CD1
122	0.463406868	0	67	22	4h_DINCH_1_ctrlLPS	4h_ctrlLPS_pvalue	LXR/RXR Activation
123	0.453308781	NA	19	21	4h_DINCH_1_ctrlLPS	4h_ctrlLPS_pvalue	Mechanisms of Viral Exit from Host Cells
124	0.125030337	NA	129	21	4h_DINCH_1_ctrlLPS	4h_ctrlLPS_pvalue	Methionine Degradation I (to Homocysteine)
125	0	NA	162	21	4h_DINCH_1_ctrlLPS	4h_ctrlLPS_pvalue	Methylthiopropionate Biosynthesis
126	0.162895484	NA	111	17	4h_DINCH_1_ctrlLPS	4h_ctrlLPS_pvalue	Mevalonate Pathway I
127	1.806388214	NA	168	21	4h_DINCH_1_ctrlLPS	4h_ctrlLPS_pvalue	Mitochondrial Dysfunction
128	0.445264349	NA	25	21	4h_DINCH_1_ctrlLPS	4h_ctrlLPS_pvalue	Mitotic Roles of Polo-Like Kinase
129	1.071777461	NA	50	18	4h_DINCH_1_ctrlLPS	4h_ctrlLPS_pvalue	mTOR Signaling
130	0.339595386	1	97	17	4h_DINCH_1_ctrlLPS	4h_ctrlLPS_pvalue	Natural Killer Cell Signaling
131	0.463406868	-1.667	29	10	4h_DINCH_1_ctrlLPS	4h_ctrlLPS_pvalue	Necroptosis Signaling Pathway
132	0.085842726	NA	109	18	4h_DINCH_1_ctrlLPS	4h_ctrlLPS_pvalue	Neuregulin Signaling
133	0	NA	210	16	4h_DINCH_1_ctrlLPS	4h_ctrlLPS_pvalue	Neuroprotective Role of THOP1 in Alzheimer's Disease
134	0.688553601	-0.378	6	3	4h_DINCH_1_ctrlLPS	4h_ctrlLPS_pvalue	NRF2-mediated Oxidative Stress Response
135	0	NA	161	21	4h_DINCH_1_ctrlLPS	4h_ctrlLPS_pvalue	Nucleotide Excision Repair Pathway
136	1.910019764	-1.508	81	5	4h_DINCH_1_ctrlLPS	4h_ctrlLPS_pvalue	Oxidative Phosphorylation
137	0.29266542	0.447	80	20	4h_DINCH_1_ctrlLPS	4h_ctrlLPS_pvalue	P2Y Purigenic Receptor Signaling Pathway
138	0	NA	53	12	4h_DINCH_1_ctrlLPS	4h_ctrlLPS_pvalue	p70S6K Signaling
139	0.125030337	NA	200	21	4h_DINCH_1_ctrlLPS	4h_ctrlLPS_pvalue	Pancreatic Adenocarcinoma Signaling
140	0.421177181	NA	123	21	4h_DINCH_1_ctrlLPS	4h_ctrlLPS_pvalue	Parkinson's Signaling
141	0	NA	66	13	4h_DINCH_1_ctrlLPS	4h_ctrlLPS_pvalue	Paxillin Signaling
142	0.108368102	NA	88	20	4h_DINCH_1_ctrlLPS	4h_ctrlLPS_pvalue	PDGF Signaling
143	0.445264349	NA	219	17	4h_DINCH_1_ctrlLPS	4h_ctrlLPS_pvalue	Pentose Phosphate Pathway
144	0.631538251	NA	181	21	4h_DINCH_1_ctrlLPS	4h_ctrlLPS_pvalue	Pentose Phosphate Pathway (Non-oxidative Branch)
145	0	NA	189	21	4h_DINCH_1_ctrlLPS	4h_ctrlLPS_pvalue	Pentose Phosphate Pathway (Oxidative Branch)
146	0.421177181	0	149	21	4h_DINCH_1_ctrlLPS	4h_ctrlLPS_pvalue	PFKFB4 Signaling Pathway
147	2.799049401	NA	174	21	4h_DINCH_1_ctrlLPS	4h_ctrlLPS_pvalue	Phagosome Maturation
148	0.421177181	NA	132	21	4h_DINCH_1_ctrlLPS	4h_ctrlLPS_pvalue	Phenylalanine Degradation IV (Mammalian, via Side Chain)
149	0.362009028	NA	146	21	4h_DINCH_1_ctrlLPS	4h_ctrlLPS_pvalue	Phenylethylamine Degradation I
150	0.216725421	-1.134	13	7	4h_DINCH_1_ctrlLPS	4h_ctrlLPS_pvalue	PI3K/AKT Signaling
151	0.10881392	NA	8	21	4h_DINCH_1_ctrlLPS	4h_ctrlLPS_pvalue	Polyamine Regulation in Colon Cancer
152	0.463406868	0.378	48	11	4h_DINCH_1_ctrlLPS	4h_ctrlLPS_pvalue	PPAR Signaling
153	0.631538251	0.302	54	20	4h_DINCH_1_ctrlLPS	4h_ctrlLPS_pvalue	PPAR?/RXR? Activation
154	0.445264349	-0.333	61	20	4h_DINCH_1_ctrlLPS	4h_ctrlLPS_pvalue	Production of Nitric Oxide and Reactive Oxygen Species in Macrophages
155	0.192512453	NA	185	21	4h_DINCH_1_ctrlLPS	4h_ctrlLPS_pvalue	Prostate Cancer Signaling
156	0.421177181	0	44	19	4h_DINCH_1_ctrlLPS	4h_ctrlLPS_pvalue	Protein Kinase A Signaling
157	1.441685174	NA	137	21	4h_DINCH_1_ctrlLPS	4h_ctrlLPS_pvalue	Protein Ubiquitination Pathway
158	0	NA	120	21	4h_DINCH_1_ctrlLPS	4h_ctrlLPS_pvalue	Purine Nucleotides De Novo Biosynthesis II
159	0	NA	142	21	4h_DINCH_1_ctrlLPS	4h_ctrlLPS_pvalue	Pyruvate Fermentation to Lactate
160	0.339595386	-1.633	21	5	4h_DINCH_1_ctrlLPS	4h_ctrlLPS_pvalue	Rac Signaling
161	0.132400933	NA	156	21	4h_DINCH_1_ctrlLPS	4h_ctrlLPS_pvalue	RAN Signaling
162	0.421177181	NA	122	21	4h_DINCH_1_ctrlLPS	4h_ctrlLPS_pvalue	RAR Activation
163	0	NA	82	19	4h_DINCH_1_ctrlLPS	4h_ctrlLPS_pvalue	Reelin Signaling in Neurons
164	0.362009028	-1	86	5	4h_DINCH_1_ctrlLPS	4h_ctrlLPS_pvalue	Regulation of Actin-based Motility by Rho
165	0.081424693	NA	165	21	4h_DINCH_1_ctrlLPS	4h_ctrlLPS_pvalue	Regulation of Cellular Mechanics by Calpain Protease
166	2.491281259	NA	76	19	4h_DINCH_1_ctrlLPS	4h_ctrlLPS_pvalue	Regulation of eIF4 and p70S6K Signaling
167	0.124799213	0	103	20	4h_DINCH_1_ctrlLPS	4h_ctrlLPS_pvalue	Regulation Of The Epithelial Mesenchymal Transition By Growth Factors Pathway
168	0.332259522	0.447	106	18	4h_DINCH_1_ctrlLPS	4h_ctrlLPS_pvalue	Relaxin Signaling
169	0.661847006	NA	87	15	4h_DINCH_1_ctrlLPS	4h_ctrlLPS_pvalue	Remodeling of Epithelial Adherens Junctions
170	0	NA	211	18	4h_DINCH_1_ctrlLPS	4h_ctrlLPS_pvalue	Renal Cell Carcinoma Signaling
171	0.231633042	-2.236	3	3	4h_DINCH_1_ctrlLPS	4h_ctrlLPS_pvalue	RhoA Signaling
172	0.362009028	1.342	65	4	4h_DINCH_1_ctrlLPS	4h_ctrlLPS_pvalue	RhoGDI Signaling
173	0.175715339	NA	187	21	4h_DINCH_1_ctrlLPS	4h_ctrlLPS_pvalue	Role of IL-17A in Psoriasis
174	0.327871166	NA	173	21	4h_DINCH_1_ctrlLPS	4h_ctrlLPS_pvalue	Role of IL-17F in Allergic Inflammatory Airway Diseases
175	0.835144269	NA	121	21	4h_DINCH_1_ctrlLPS	4h_ctrlLPS_pvalue	Role of JAK1, JAK2 and TYK2 in Interferon Signaling
176	0.145638417	-0.447	73	18	4h_DINCH_1_ctrlLPS	4h_ctrlLPS_pvalue	Role of NFAT in Cardiac Hypertrophy
177	0.099626922	NA	216	19	4h_DINCH_1_ctrlLPS	4h_ctrlLPS_pvalue	Role of PI3K/AKT Signaling in the Pathogenesis of Influenza
178	1.974029409	1.508	36	4	4h_DINCH_1_ctrlLPS	4h_ctrlLPS_pvalue	Role of PKR in Interferon Induction and Antiviral Response
179	0	NA	164	21	4h_DINCH_1_ctrlLPS	4h_ctrlLPS_pvalue	Role of Tissue Factor in Cancer
180	0	NA	144	21	4h_DINCH_1_ctrlLPS	4h_ctrlLPS_pvalue	S-adenosyl-L-methionine Biosynthesis
181	0.065795833	NA	59	21	4h_DINCH_1_ctrlLPS	4h_ctrlLPS_pvalue	SAPK/JNK Signaling
182	0	NA	24	21	4h_DINCH_1_ctrlLPS	4h_ctrlLPS_pvalue	Selenocysteine Biosynthesis II (Archaea and Eukaryotes)
183	0.110647665	NA	20	21	4h_DINCH_1_ctrlLPS	4h_ctrlLPS_pvalue	Semaphorin Signaling in Neurons
184	0.339595386	NA	133	21	4h_DINCH_1_ctrlLPS	4h_ctrlLPS_pvalue	Serine Biosynthesis
185	0.631538251	-1.265	42	5	4h_DINCH_1_ctrlLPS	4h_ctrlLPS_pvalue	Signaling by Rho Family GTPases
186	2.637661327	-1.5	113	10	4h_DINCH_1_ctrlLPS	4h_ctrlLPS_pvalue	Sirtuin Signaling Pathway
187	0	NA	145	21	4h_DINCH_1_ctrlLPS	4h_ctrlLPS_pvalue	Sorbitol Degradation I
188	0	NA	206	18	4h_DINCH_1_ctrlLPS	4h_ctrlLPS_pvalue	SPINK1 Pancreatic Cancer Pathway
189	0.29266542	NA	51	15	4h_DINCH_1_ctrlLPS	4h_ctrlLPS_pvalue	Spliceosomal Cycle
190	0	NA	37	21	4h_DINCH_1_ctrlLPS	4h_ctrlLPS_pvalue	Sucrose Degradation V (Mammalian)
191	0	NA	170	21	4h_DINCH_1_ctrlLPS	4h_ctrlLPS_pvalue	Sulfate Activation for Sulfonation
192	0.371014588	-2	77	10	4h_DINCH_1_ctrlLPS	4h_ctrlLPS_pvalue	Sumoylation Pathway
193	0.229427763	NA	218	19	4h_DINCH_1_ctrlLPS	4h_ctrlLPS_pvalue	Superoxide Radicals Degradation
194	0.421177181	NA	100	17	4h_DINCH_1_ctrlLPS	4h_ctrlLPS_pvalue	Superpathway of Cholesterol Biosynthesis
195	0.125030337	NA	220	17	4h_DINCH_1_ctrlLPS	4h_ctrlLPS_pvalue	Superpathway of Geranylgeranyldiphosphate Biosynthesis I (via Mevalonate)
196	0.216725421	NA	197	21	4h_DINCH_1_ctrlLPS	4h_ctrlLPS_pvalue	Superpathway of Methionine Degradation
197	0.29128652	NA	34	21	4h_DINCH_1_ctrlLPS	4h_ctrlLPS_pvalue	Superpathway of Serine and Glycine Biosynthesis I
198	0	0.447	78	18	4h_DINCH_1_ctrlLPS	4h_ctrlLPS_pvalue	Synaptogenesis Signaling Pathway
199	0.327871166	NA	79	15	4h_DINCH_1_ctrlLPS	4h_ctrlLPS_pvalue	TCA Cycle II (Eukaryotic)
200	0.288074287	1	47	11	4h_DINCH_1_ctrlLPS	4h_ctrlLPS_pvalue	Tec Kinase Signaling
201	0.362009028	-2	91	7	4h_DINCH_1_ctrlLPS	4h_ctrlLPS_pvalue	Telomerase Signaling
202	0.371014588	NA	184	21	4h_DINCH_1_ctrlLPS	4h_ctrlLPS_pvalue	Telomere Extension by Telomerase
203	0.421177181	2.236	15	4	4h_DINCH_1_ctrlLPS	4h_ctrlLPS_pvalue	Th17 Activation Pathway
204	0.275384527	0	119	19	4h_DINCH_1_ctrlLPS	4h_ctrlLPS_pvalue	Thrombin Signaling
205	0.661847006	NA	124	21	4h_DINCH_1_ctrlLPS	4h_ctrlLPS_pvalue	Tight Junction Signaling
206	0	NA	135	21	4h_DINCH_1_ctrlLPS	4h_ctrlLPS_pvalue	Triacylglycerol Degradation
207	0.339595386	NA	55	21	4h_DINCH_1_ctrlLPS	4h_ctrlLPS_pvalue	tRNA Charging
208	0.090741675	NA	212	17	4h_DINCH_1_ctrlLPS	4h_ctrlLPS_pvalue	Tryptophan Degradation III (Eukaryotic)
209	0.085842726	NA	136	21	4h_DINCH_1_ctrlLPS	4h_ctrlLPS_pvalue	Tumoricidal Function of Hepatic Natural Killer Cells
210	0	NA	141	21	4h_DINCH_1_ctrlLPS	4h_ctrlLPS_pvalue	UDP-D-xylose and UDP-D-glucuronate Biosynthesis
211	0	NA	157	21	4h_DINCH_1_ctrlLPS	4h_ctrlLPS_pvalue	UDP-N-acetyl-D-galactosamine Biosynthesis I
212	0.463406868	-2.236	14	3	4h_DINCH_1_ctrlLPS	4h_ctrlLPS_pvalue	Unfolded protein response
213	0	NA	209	17	4h_DINCH_1_ctrlLPS	4h_ctrlLPS_pvalue	Valine Degradation I
214	0.29266542	NA	63	19	4h_DINCH_1_ctrlLPS	4h_ctrlLPS_pvalue	VEGF Signaling
215	0.463406868	NA	152	21	4h_DINCH_1_ctrlLPS	4h_ctrlLPS_pvalue	Virus Entry via Endocytic Pathways
216	0.332259522	NA	155	21	4h_DINCH_1_ctrlLPS	4h_ctrlLPS_pvalue	Vitamin-C Transport
217	0.41850815	2.236	70	11	4h_DINCH_1_ctrlLPS	4h_ctrlLPS_pvalue	Xenobiotic Metabolism AHR Signaling Pathway
218	0.29266542	-0.378	115	17	4h_DINCH_1_ctrlLPS	4h_ctrlLPS_pvalue	Xenobiotic Metabolism CAR Signaling Pathway
219	0.175715339	0.816	39	11	4h_DINCH_1_ctrlLPS	4h_ctrlLPS_pvalue	Xenobiotic Metabolism PXR Signaling Pathway
220	0.339595386	NA	33	21	4h_DINCH_1_ctrlLPS	4h_ctrlLPS_pvalue	Xenobiotic Metabolism Signaling
221	0.631538251	NA	186	21	4h_DINCH_1_ctrlLPS	4h_ctrlLPS_pvalue	Zymosterol Biosynthesis
222	0.045119792	NA	221	18	4h_DINCH_2_ctrlLPS	4h_ctrlLPS_pvalue	?-Adrenergic Signaling
223	0.450860971	NA	138	21	4h_DINCH_2_ctrlLPS	4h_ctrlLPS_pvalue	?-glutamyl Cycle
224	0.203215654	-2	11	8	4h_DINCH_2_ctrlLPS	4h_ctrlLPS_pvalue	14-3-3-mediated Signaling
225	0.860315185	NA	194	21	4h_DINCH_2_ctrlLPS	4h_ctrlLPS_pvalue	2-ketoglutarate Dehydrogenase Complex
226	0.20267511	NA	130	21	4h_DINCH_2_ctrlLPS	4h_ctrlLPS_pvalue	Acetyl-CoA Biosynthesis I (Pyruvate Dehydrogenase Complex)
227	0	NA	160	21	4h_DINCH_2_ctrlLPS	4h_ctrlLPS_pvalue	Acetyl-CoA Biosynthesis III (from Citrate)
228	0.450860971	-1.265	2	3	4h_DINCH_2_ctrlLPS	4h_ctrlLPS_pvalue	Actin Cytoskeleton Signaling
229	0.083890688	NA	114	15	4h_DINCH_2_ctrlLPS	4h_ctrlLPS_pvalue	Actin Nucleation by ARP-WASP Complex
230	0.450860971	NA	154	21	4h_DINCH_2_ctrlLPS	4h_ctrlLPS_pvalue	Acyl Carrier Protein Metabolism
231	0.450860971	NA	150	21	4h_DINCH_2_ctrlLPS	4h_ctrlLPS_pvalue	Adenine and Adenosine Salvage VI
232	0.20267511	NA	28	21	4h_DINCH_2_ctrlLPS	4h_ctrlLPS_pvalue	Agranulocyte Adhesion and Diapedesis
233	0.097837221	NA	147	21	4h_DINCH_2_ctrlLPS	4h_ctrlLPS_pvalue	Aldosterone Signaling in Epithelial Cells
234	0.352433712	0	60	16	4h_DINCH_2_ctrlLPS	4h_ctrlLPS_pvalue	AMPK Signaling
235	0.064675676	NA	171	21	4h_DINCH_2_ctrlLPS	4h_ctrlLPS_pvalue	Amyloid Processing
236	0	NA	199	18	4h_DINCH_2_ctrlLPS	4h_ctrlLPS_pvalue	Angiopoietin Signaling
237	0.450860971	NA	32	21	4h_DINCH_2_ctrlLPS	4h_ctrlLPS_pvalue	Antigen Presentation Pathway
238	0	NA	75	19	4h_DINCH_2_ctrlLPS	4h_ctrlLPS_pvalue	Antiproliferative Role of Somatostatin Receptor 2
239	0.09007874	NA	116	22	4h_DINCH_2_ctrlLPS	4h_ctrlLPS_pvalue	Antiproliferative Role of TOB in T Cell Signaling
240	0	NA	71	14	4h_DINCH_2_ctrlLPS	4h_ctrlLPS_pvalue	Apelin Adipocyte Signaling Pathway
241	0.04941458	NA	69	12	4h_DINCH_2_ctrlLPS	4h_ctrlLPS_pvalue	Apelin Cardiomyocyte Signaling Pathway
242	1.269135995	-0.333	214	21	4h_DINCH_2_ctrlLPS	4h_ctrlLPS_pvalue	Apoptosis Signaling
243	0	NA	131	21	4h_DINCH_2_ctrlLPS	4h_ctrlLPS_pvalue	Arginine Biosynthesis IV
244	0.352433712	1	68	11	4h_DINCH_2_ctrlLPS	4h_ctrlLPS_pvalue	Aryl Hydrocarbon Receptor Signaling
245	0	NA	140	21	4h_DINCH_2_ctrlLPS	4h_ctrlLPS_pvalue	Aspartate Degradation II
246	0	NA	26	21	4h_DINCH_2_ctrlLPS	4h_ctrlLPS_pvalue	Axonal Guidance Signaling
247	0.77457613	-2.236	9	6	4h_DINCH_2_ctrlLPS	4h_ctrlLPS_pvalue	BAG2 Signaling Pathway
248	0.352433712	NA	190	21	4h_DINCH_2_ctrlLPS	4h_ctrlLPS_pvalue	BER pathway
249	0.254120835	NA	151	21	4h_DINCH_2_ctrlLPS	4h_ctrlLPS_pvalue	Branched-chain ?-keto acid Dehydrogenase Complex
250	0.415180534	-1	201	21	4h_DINCH_2_ctrlLPS	4h_ctrlLPS_pvalue	Calcium-induced T Lymphocyte Apoptosis
251	0.450860971	NA	104	18	4h_DINCH_2_ctrlLPS	4h_ctrlLPS_pvalue	Calcium Signaling
252	0.082222238	0	208	18	4h_DINCH_2_ctrlLPS	4h_ctrlLPS_pvalue	Cardiac ?-adrenergic Signaling
253	0	-0.447	58	21	4h_DINCH_2_ctrlLPS	4h_ctrlLPS_pvalue	Cardiac Hypertrophy Signaling
254	0.860315185	NA	188	21	4h_DINCH_2_ctrlLPS	4h_ctrlLPS_pvalue	Caveolar-mediated Endocytosis Signaling
255	0	NA	18	21	4h_DINCH_2_ctrlLPS	4h_ctrlLPS_pvalue	CCR3 Signaling in Eosinophils
256	0.050059497	NA	112	19	4h_DINCH_2_ctrlLPS	4h_ctrlLPS_pvalue	CD28 Signaling in T Helper Cells
257	0	NA	17	21	4h_DINCH_2_ctrlLPS	4h_ctrlLPS_pvalue	CD40 Signaling
258	0.450860971	-2.236	7	6	4h_DINCH_2_ctrlLPS	4h_ctrlLPS_pvalue	Cdc42 Signaling
259	0.138724704	NA	204	20	4h_DINCH_2_ctrlLPS	4h_ctrlLPS_pvalue	Cell Cycle Control of Chromosomal Replication
260	0.177434349	NA	31	21	4h_DINCH_2_ctrlLPS	4h_ctrlLPS_pvalue	Cell Cycle: G2/M DNA Damage Checkpoint Regulation
261	0.050059497	NA	90	19	4h_DINCH_2_ctrlLPS	4h_ctrlLPS_pvalue	Ceramide Signaling
262	0	NA	92	19	4h_DINCH_2_ctrlLPS	4h_ctrlLPS_pvalue	Chemokine Signaling
263	0	NA	125	21	4h_DINCH_2_ctrlLPS	4h_ctrlLPS_pvalue	Chronic Myeloid Leukemia Signaling
264	0.219359194	NA	16	21	4h_DINCH_2_ctrlLPS	4h_ctrlLPS_pvalue	Citrulline Biosynthesis
265	0.450860971	NA	175	21	4h_DINCH_2_ctrlLPS	4h_ctrlLPS_pvalue	Clathrin-mediated Endocytosis Signaling
266	0	1.342	94	16	4h_DINCH_2_ctrlLPS	4h_ctrlLPS_pvalue	Colorectal Cancer Metastasis Signaling
267	2.761759375	2	1	1	4h_DINCH_2_ctrlLPS	4h_ctrlLPS_pvalue	Coronavirus Pathogenesis Pathway
268	0.352433712	NA	158	21	4h_DINCH_2_ctrlLPS	4h_ctrlLPS_pvalue	Crosstalk between Dendritic Cells and Natural Killer Cells
269	0.253831613	NA	127	21	4h_DINCH_2_ctrlLPS	4h_ctrlLPS_pvalue	CTLA4 Signaling in Cytotoxic T Lymphocytes
270	0	NA	43	19	4h_DINCH_2_ctrlLPS	4h_ctrlLPS_pvalue	CXCR4 Signaling
271	0.062127537	NA	22	21	4h_DINCH_2_ctrlLPS	4h_ctrlLPS_pvalue	Cysteine Biosynthesis III (mammalia)
272	1.502996765	0	23	21	4h_DINCH_2_ctrlLPS	4h_ctrlLPS_pvalue	Cytotoxic T Lymphocyte-mediated Apoptosis of Target Cells
273	0.450860971	NA	183	21	4h_DINCH_2_ctrlLPS	4h_ctrlLPS_pvalue	D-mannose Degradation
274	1.232191588	-0.707	110	21	4h_DINCH_2_ctrlLPS	4h_ctrlLPS_pvalue	Death Receptor Signaling
275	0.083890688	NA	191	21	4h_DINCH_2_ctrlLPS	4h_ctrlLPS_pvalue	DNA Double-Strand Break Repair by Non-Homologous End Joining
276	0.050059497	NA	177	21	4h_DINCH_2_ctrlLPS	4h_ctrlLPS_pvalue	Dopamine Degradation
277	5.532856136	-0.905	4	2	4h_DINCH_2_ctrlLPS	4h_ctrlLPS_pvalue	EIF2 Signaling
278	0.244586568	NA	198	21	4h_DINCH_2_ctrlLPS	4h_ctrlLPS_pvalue	Endoplasmic Reticulum Stress Pathway
279	0	NA	217	17	4h_DINCH_2_ctrlLPS	4h_ctrlLPS_pvalue	Ephrin B Signaling
280	0	0	46	5	4h_DINCH_2_ctrlLPS	4h_ctrlLPS_pvalue	Ephrin Receptor Signaling
281	0.252296743	NA	179	21	4h_DINCH_2_ctrlLPS	4h_ctrlLPS_pvalue	Epithelial Adherens Junction Signaling
282	0.149050559	-0.447	99	19	4h_DINCH_2_ctrlLPS	4h_ctrlLPS_pvalue	ERK/MAPK Signaling
283	0.312993102	-1.342	83	15	4h_DINCH_2_ctrlLPS	4h_ctrlLPS_pvalue	ERK5 Signaling
284	0.138724704	NA	192	21	4h_DINCH_2_ctrlLPS	4h_ctrlLPS_pvalue	Estrogen Biosynthesis
285	0.2816238	-0.277	93	19	4h_DINCH_2_ctrlLPS	4h_ctrlLPS_pvalue	Estrogen Receptor Signaling
286	0.199607591	NA	98	20	4h_DINCH_2_ctrlLPS	4h_ctrlLPS_pvalue	FAT10 Cancer Signaling Pathway
287	0.26596228	NA	205	16	4h_DINCH_2_ctrlLPS	4h_ctrlLPS_pvalue	FAT10 Signaling Pathway
288	0.030063141	NA	38	19	4h_DINCH_2_ctrlLPS	4h_ctrlLPS_pvalue	Fatty Acid ?-oxidation I
289	0.09007874	-2	12	9	4h_DINCH_2_ctrlLPS	4h_ctrlLPS_pvalue	Fc? Receptor-mediated Phagocytosis in Macrophages and Monocytes
290	0	NA	108	7	4h_DINCH_2_ctrlLPS	4h_ctrlLPS_pvalue	fMLP Signaling in Neutrophils
291	0.219359194	NA	166	21	4h_DINCH_2_ctrlLPS	4h_ctrlLPS_pvalue	Folate Polyglutamylation
292	0.135310885	NA	10	21	4h_DINCH_2_ctrlLPS	4h_ctrlLPS_pvalue	Folate Transformations I
293	0	NA	128	21	4h_DINCH_2_ctrlLPS	4h_ctrlLPS_pvalue	G Protein Signaling Mediated by Tubby
294	0	NA	45	20	4h_DINCH_2_ctrlLPS	4h_ctrlLPS_pvalue	G?q Signaling
295	0.352433712	NA	178	21	4h_DINCH_2_ctrlLPS	4h_ctrlLPS_pvalue	Germ Cell-Sertoli Cell Junction Signaling
296	0	NA	101	18	4h_DINCH_2_ctrlLPS	4h_ctrlLPS_pvalue	Glioma Invasiveness Signaling
297	0.050059497	NA	172	21	4h_DINCH_2_ctrlLPS	4h_ctrlLPS_pvalue	Glucocorticoid Receptor Signaling
298	0.219359194	NA	102	13	4h_DINCH_2_ctrlLPS	4h_ctrlLPS_pvalue	Gluconeogenesis I
299	0.177434349	NA	118	21	4h_DINCH_2_ctrlLPS	4h_ctrlLPS_pvalue	Glutamate Receptor Signaling
300	0.450860971	NA	62	21	4h_DINCH_2_ctrlLPS	4h_ctrlLPS_pvalue	Glutamate Removal from Folates
301	0.450860971	NA	169	21	4h_DINCH_2_ctrlLPS	4h_ctrlLPS_pvalue	Glutamine Degradation I
302	0.291302935	NA	215	17	4h_DINCH_2_ctrlLPS	4h_ctrlLPS_pvalue	Glutaryl-CoA Degradation
303	0.244586568	NA	207	21	4h_DINCH_2_ctrlLPS	4h_ctrlLPS_pvalue	Glutathione-mediated Detoxification
304	0.291302935	NA	126	21	4h_DINCH_2_ctrlLPS	4h_ctrlLPS_pvalue	Glutathione Biosynthesis
305	0	NA	195	21	4h_DINCH_2_ctrlLPS	4h_ctrlLPS_pvalue	Glutathione Redox Reactions I
306	0	NA	27	21	4h_DINCH_2_ctrlLPS	4h_ctrlLPS_pvalue	Glutathione Redox Reactions II
307	0.20267511	NA	193	21	4h_DINCH_2_ctrlLPS	4h_ctrlLPS_pvalue	Glycine Cleavage Complex
308	0.352433712	NA	167	21	4h_DINCH_2_ctrlLPS	4h_ctrlLPS_pvalue	Glycine Degradation (Creatine Biosynthesis)
309	0.621221255	NA	148	21	4h_DINCH_2_ctrlLPS	4h_ctrlLPS_pvalue	Glycogen Biosynthesis II (from UDP-D-Glucose)
310	0.97645387	-1	56	13	4h_DINCH_2_ctrlLPS	4h_ctrlLPS_pvalue	Glycolysis I
311	0	NA	40	18	4h_DINCH_2_ctrlLPS	4h_ctrlLPS_pvalue	GM-CSF Signaling
312	0.291302935	NA	153	21	4h_DINCH_2_ctrlLPS	4h_ctrlLPS_pvalue	Granzyme A Signaling
313	0.621221255	NA	139	21	4h_DINCH_2_ctrlLPS	4h_ctrlLPS_pvalue	Granzyme B Signaling
314	0.149050559	NA	196	21	4h_DINCH_2_ctrlLPS	4h_ctrlLPS_pvalue	Heme Biosynthesis II
315	0.203215654	-0.333	85	19	4h_DINCH_2_ctrlLPS	4h_ctrlLPS_pvalue	HIF1? Signaling
316	0.254120835	1	52	20	4h_DINCH_2_ctrlLPS	4h_ctrlLPS_pvalue	HIPPO signaling
317	0.352433712	NA	107	11	4h_DINCH_2_ctrlLPS	4h_ctrlLPS_pvalue	Huntington's Disease Signaling
318	0.183256114	NA	159	21	4h_DINCH_2_ctrlLPS	4h_ctrlLPS_pvalue	Hypoxia Signaling in the Cardiovascular System
319	0.264511166	NA	64	18	4h_DINCH_2_ctrlLPS	4h_ctrlLPS_pvalue	IGF-1 Signaling
320	0.08317533	NA	176	21	4h_DINCH_2_ctrlLPS	4h_ctrlLPS_pvalue	IL-10 Signaling
321	0.074189215	NA	117	20	4h_DINCH_2_ctrlLPS	4h_ctrlLPS_pvalue	IL-15 Signaling
322	0.091290283	NA	213	20	4h_DINCH_2_ctrlLPS	4h_ctrlLPS_pvalue	IL-17A Signaling in Airway Cells
323	0.076954526	NA	49	20	4h_DINCH_2_ctrlLPS	4h_ctrlLPS_pvalue	IL-23 Signaling Pathway
324	0	NA	72	20	4h_DINCH_2_ctrlLPS	4h_ctrlLPS_pvalue	IL-3 Signaling
325	0.045119792	-2.236	5	5	4h_DINCH_2_ctrlLPS	4h_ctrlLPS_pvalue	IL-8 Signaling
326	0.450860971	-0.632	96	7	4h_DINCH_2_ctrlLPS	4h_ctrlLPS_pvalue	ILK Signaling
327	0.396826487	1	35	19	4h_DINCH_2_ctrlLPS	4h_ctrlLPS_pvalue	Induction of Apoptosis by HIV1
328	0.244586568	NA	134	21	4h_DINCH_2_ctrlLPS	4h_ctrlLPS_pvalue	Inflammasome pathway
329	0.450860971	0	89	12	4h_DINCH_2_ctrlLPS	4h_ctrlLPS_pvalue	Inhibition of ARE-Mediated mRNA Degradation Pathway
330	0.076954526	NA	30	21	4h_DINCH_2_ctrlLPS	4h_ctrlLPS_pvalue	iNOS Signaling
331	0.135310885	0	84	12	4h_DINCH_2_ctrlLPS	4h_ctrlLPS_pvalue	Insulin Secretion Signaling Pathway
332	0.291302935	-1	105	15	4h_DINCH_2_ctrlLPS	4h_ctrlLPS_pvalue	Integrin Signaling
333	0	NA	203	20	4h_DINCH_2_ctrlLPS	4h_ctrlLPS_pvalue	Interferon Signaling
334	0.619552464	NA	143	21	4h_DINCH_2_ctrlLPS	4h_ctrlLPS_pvalue	Iron homeostasis signaling pathway
335	0.291302935	NA	74	17	4h_DINCH_2_ctrlLPS	4h_ctrlLPS_pvalue	Isoleucine Degradation I
336	0.059494676	NA	95	20	4h_DINCH_2_ctrlLPS	4h_ctrlLPS_pvalue	JAK/Stat Signaling
337	0.104142101	NA	202	21	4h_DINCH_2_ctrlLPS	4h_ctrlLPS_pvalue	Ketogenesis
338	0.149050559	NA	180	21	4h_DINCH_2_ctrlLPS	4h_ctrlLPS_pvalue	Ketolysis
339	0	NA	182	21	4h_DINCH_2_ctrlLPS	4h_ctrlLPS_pvalue	Lactose Degradation III
340	0	NA	163	21	4h_DINCH_2_ctrlLPS	4h_ctrlLPS_pvalue	Leucine Degradation I
341	0.321932683	-1	57	5	4h_DINCH_2_ctrlLPS	4h_ctrlLPS_pvalue	Leukocyte Extravasation Signaling
342	0.20267511	NA	41	21	4h_DINCH_2_ctrlLPS	4h_ctrlLPS_pvalue	Lipid Antigen Presentation by CD1
343	0.1610099	NA	67	22	4h_DINCH_2_ctrlLPS	4h_ctrlLPS_pvalue	LXR/RXR Activation
344	0.08317533	NA	19	21	4h_DINCH_2_ctrlLPS	4h_ctrlLPS_pvalue	Mechanisms of Viral Exit from Host Cells
345	0.074189215	NA	129	21	4h_DINCH_2_ctrlLPS	4h_ctrlLPS_pvalue	Methionine Degradation I (to Homocysteine)
346	0.450860971	NA	162	21	4h_DINCH_2_ctrlLPS	4h_ctrlLPS_pvalue	Methylthiopropionate Biosynthesis
347	0.352433712	NA	111	17	4h_DINCH_2_ctrlLPS	4h_ctrlLPS_pvalue	Mevalonate Pathway I
348	2.761759375	NA	168	21	4h_DINCH_2_ctrlLPS	4h_ctrlLPS_pvalue	Mitochondrial Dysfunction
349	0	NA	25	21	4h_DINCH_2_ctrlLPS	4h_ctrlLPS_pvalue	Mitotic Roles of Polo-Like Kinase
350	1.050086943	NA	50	18	4h_DINCH_2_ctrlLPS	4h_ctrlLPS_pvalue	mTOR Signaling
351	0.328425135	0	97	17	4h_DINCH_2_ctrlLPS	4h_ctrlLPS_pvalue	Natural Killer Cell Signaling
352	0	-1	29	10	4h_DINCH_2_ctrlLPS	4h_ctrlLPS_pvalue	Necroptosis Signaling Pathway
353	0.09007874	NA	109	18	4h_DINCH_2_ctrlLPS	4h_ctrlLPS_pvalue	Neuregulin Signaling
354	0.050059497	NA	210	16	4h_DINCH_2_ctrlLPS	4h_ctrlLPS_pvalue	Neuroprotective Role of THOP1 in Alzheimer's Disease
355	1.232191588	-1.342	6	3	4h_DINCH_2_ctrlLPS	4h_ctrlLPS_pvalue	NRF2-mediated Oxidative Stress Response
356	0.453233681	NA	161	21	4h_DINCH_2_ctrlLPS	4h_ctrlLPS_pvalue	Nucleotide Excision Repair Pathway
357	0.621221255	-1.414	81	5	4h_DINCH_2_ctrlLPS	4h_ctrlLPS_pvalue	Oxidative Phosphorylation
358	0	NA	80	20	4h_DINCH_2_ctrlLPS	4h_ctrlLPS_pvalue	P2Y Purigenic Receptor Signaling Pathway
359	0.045119792	NA	53	12	4h_DINCH_2_ctrlLPS	4h_ctrlLPS_pvalue	p70S6K Signaling
360	0.065972184	NA	200	21	4h_DINCH_2_ctrlLPS	4h_ctrlLPS_pvalue	Pancreatic Adenocarcinoma Signaling
361	0.104142101	NA	123	21	4h_DINCH_2_ctrlLPS	4h_ctrlLPS_pvalue	Parkinson's Signaling
362	0.616120971	-1.633	66	13	4h_DINCH_2_ctrlLPS	4h_ctrlLPS_pvalue	Paxillin Signaling
363	0.119847898	1	88	20	4h_DINCH_2_ctrlLPS	4h_ctrlLPS_pvalue	PDGF Signaling
364	0.119847898	NA	219	17	4h_DINCH_2_ctrlLPS	4h_ctrlLPS_pvalue	Pentose Phosphate Pathway
365	0.20267511	NA	181	21	4h_DINCH_2_ctrlLPS	4h_ctrlLPS_pvalue	Pentose Phosphate Pathway (Non-oxidative Branch)
366	0	NA	189	21	4h_DINCH_2_ctrlLPS	4h_ctrlLPS_pvalue	Pentose Phosphate Pathway (Oxidative Branch)
367	0.074189215	NA	149	21	4h_DINCH_2_ctrlLPS	4h_ctrlLPS_pvalue	PFKFB4 Signaling Pathway
368	1.233202694	NA	174	21	4h_DINCH_2_ctrlLPS	4h_ctrlLPS_pvalue	Phagosome Maturation
369	0.097837221	NA	132	21	4h_DINCH_2_ctrlLPS	4h_ctrlLPS_pvalue	Phenylalanine Degradation IV (Mammalian, via Side Chain)
370	0.291302935	NA	146	21	4h_DINCH_2_ctrlLPS	4h_ctrlLPS_pvalue	Phenylethylamine Degradation I
371	0.291302935	-1	13	7	4h_DINCH_2_ctrlLPS	4h_ctrlLPS_pvalue	PI3K/AKT Signaling
372	0	NA	8	21	4h_DINCH_2_ctrlLPS	4h_ctrlLPS_pvalue	Polyamine Regulation in Colon Cancer
373	0.08317533	1	48	11	4h_DINCH_2_ctrlLPS	4h_ctrlLPS_pvalue	PPAR Signaling
374	0.105601286	0.378	54	20	4h_DINCH_2_ctrlLPS	4h_ctrlLPS_pvalue	PPAR?/RXR? Activation
375	0	1	61	20	4h_DINCH_2_ctrlLPS	4h_ctrlLPS_pvalue	Production of Nitric Oxide and Reactive Oxygen Species in Macrophages
376	0.045119792	NA	185	21	4h_DINCH_2_ctrlLPS	4h_ctrlLPS_pvalue	Prostate Cancer Signaling
377	0.1610099	-0.333	44	19	4h_DINCH_2_ctrlLPS	4h_ctrlLPS_pvalue	Protein Kinase A Signaling
378	1.232191588	NA	137	21	4h_DINCH_2_ctrlLPS	4h_ctrlLPS_pvalue	Protein Ubiquitination Pathway
379	0.104142101	NA	120	21	4h_DINCH_2_ctrlLPS	4h_ctrlLPS_pvalue	Purine Nucleotides De Novo Biosynthesis II
380	0	NA	142	21	4h_DINCH_2_ctrlLPS	4h_ctrlLPS_pvalue	Pyruvate Fermentation to Lactate
381	0.132356468	-1.342	21	5	4h_DINCH_2_ctrlLPS	4h_ctrlLPS_pvalue	Rac Signaling
382	0.078044983	NA	156	21	4h_DINCH_2_ctrlLPS	4h_ctrlLPS_pvalue	RAN Signaling
383	0.047933377	NA	122	21	4h_DINCH_2_ctrlLPS	4h_ctrlLPS_pvalue	RAR Activation
384	0.09007874	0	82	19	4h_DINCH_2_ctrlLPS	4h_ctrlLPS_pvalue	Reelin Signaling in Neurons
385	0.15041399	NA	86	5	4h_DINCH_2_ctrlLPS	4h_ctrlLPS_pvalue	Regulation of Actin-based Motility by Rho
386	0.252296743	NA	165	21	4h_DINCH_2_ctrlLPS	4h_ctrlLPS_pvalue	Regulation of Cellular Mechanics by Calpain Protease
387	2.662145525	NA	76	19	4h_DINCH_2_ctrlLPS	4h_ctrlLPS_pvalue	Regulation of eIF4 and p70S6K Signaling
388	0	1	103	20	4h_DINCH_2_ctrlLPS	4h_ctrlLPS_pvalue	Regulation Of The Epithelial Mesenchymal Transition By Growth Factors Pathway
389	0	NA	106	18	4h_DINCH_2_ctrlLPS	4h_ctrlLPS_pvalue	Relaxin Signaling
390	0.378952787	NA	87	15	4h_DINCH_2_ctrlLPS	4h_ctrlLPS_pvalue	Remodeling of Epithelial Adherens Junctions
391	0.074189215	NA	211	18	4h_DINCH_2_ctrlLPS	4h_ctrlLPS_pvalue	Renal Cell Carcinoma Signaling
392	0	NA	3	3	4h_DINCH_2_ctrlLPS	4h_ctrlLPS_pvalue	RhoA Signaling
393	0.083890688	1.633	65	4	4h_DINCH_2_ctrlLPS	4h_ctrlLPS_pvalue	RhoGDI Signaling
394	0.097837221	NA	187	21	4h_DINCH_2_ctrlLPS	4h_ctrlLPS_pvalue	Role of IL-17A in Psoriasis
395	0	NA	173	21	4h_DINCH_2_ctrlLPS	4h_ctrlLPS_pvalue	Role of IL-17F in Allergic Inflammatory Airway Diseases
396	0.20267511	NA	121	21	4h_DINCH_2_ctrlLPS	4h_ctrlLPS_pvalue	Role of JAK1, JAK2 and TYK2 in Interferon Signaling
397	0	NA	73	18	4h_DINCH_2_ctrlLPS	4h_ctrlLPS_pvalue	Role of NFAT in Cardiac Hypertrophy
398	0.050059497	NA	216	19	4h_DINCH_2_ctrlLPS	4h_ctrlLPS_pvalue	Role of PI3K/AKT Signaling in the Pathogenesis of Influenza
399	0.707655959	2.333	36	4	4h_DINCH_2_ctrlLPS	4h_ctrlLPS_pvalue	Role of PKR in Interferon Induction and Antiviral Response
400	0.119847898	NA	164	21	4h_DINCH_2_ctrlLPS	4h_ctrlLPS_pvalue	Role of Tissue Factor in Cancer
401	0.352433712	NA	144	21	4h_DINCH_2_ctrlLPS	4h_ctrlLPS_pvalue	S-adenosyl-L-methionine Biosynthesis
402	0.082222238	-1	59	21	4h_DINCH_2_ctrlLPS	4h_ctrlLPS_pvalue	SAPK/JNK Signaling
403	0.621221255	NA	24	21	4h_DINCH_2_ctrlLPS	4h_ctrlLPS_pvalue	Selenocysteine Biosynthesis II (Archaea and Eukaryotes)
404	0	NA	20	21	4h_DINCH_2_ctrlLPS	4h_ctrlLPS_pvalue	Semaphorin Signaling in Neurons
405	0	NA	133	21	4h_DINCH_2_ctrlLPS	4h_ctrlLPS_pvalue	Serine Biosynthesis
406	0	-1.342	42	5	4h_DINCH_2_ctrlLPS	4h_ctrlLPS_pvalue	Signaling by Rho Family GTPases
407	1.15834495	-0.832	113	10	4h_DINCH_2_ctrlLPS	4h_ctrlLPS_pvalue	Sirtuin Signaling Pathway
408	0.450860971	NA	145	21	4h_DINCH_2_ctrlLPS	4h_ctrlLPS_pvalue	Sorbitol Degradation I
409	0	NA	206	18	4h_DINCH_2_ctrlLPS	4h_ctrlLPS_pvalue	SPINK1 Pancreatic Cancer Pathway
410	0.066743411	NA	51	15	4h_DINCH_2_ctrlLPS	4h_ctrlLPS_pvalue	Spliceosomal Cycle
411	1.232191588	NA	37	21	4h_DINCH_2_ctrlLPS	4h_ctrlLPS_pvalue	Sucrose Degradation V (Mammalian)
412	0	NA	170	21	4h_DINCH_2_ctrlLPS	4h_ctrlLPS_pvalue	Sulfate Activation for Sulfonation
413	0.175097669	NA	77	10	4h_DINCH_2_ctrlLPS	4h_ctrlLPS_pvalue	Sumoylation Pathway
414	1.232191588	NA	218	19	4h_DINCH_2_ctrlLPS	4h_ctrlLPS_pvalue	Superoxide Radicals Degradation
415	0.638513583	0	100	17	4h_DINCH_2_ctrlLPS	4h_ctrlLPS_pvalue	Superpathway of Cholesterol Biosynthesis
416	0.609812906	NA	220	17	4h_DINCH_2_ctrlLPS	4h_ctrlLPS_pvalue	Superpathway of Geranylgeranyldiphosphate Biosynthesis I (via Mevalonate)
417	0.132356468	NA	197	21	4h_DINCH_2_ctrlLPS	4h_ctrlLPS_pvalue	Superpathway of Methionine Degradation
418	0.20267511	NA	34	21	4h_DINCH_2_ctrlLPS	4h_ctrlLPS_pvalue	Superpathway of Serine and Glycine Biosynthesis I
419	0	-0.378	78	18	4h_DINCH_2_ctrlLPS	4h_ctrlLPS_pvalue	Synaptogenesis Signaling Pathway
420	1.502996765	-0.447	79	15	4h_DINCH_2_ctrlLPS	4h_ctrlLPS_pvalue	TCA Cycle II (Eukaryotic)
421	0.045119792	-0.447	47	11	4h_DINCH_2_ctrlLPS	4h_ctrlLPS_pvalue	Tec Kinase Signaling
422	0	NA	91	7	4h_DINCH_2_ctrlLPS	4h_ctrlLPS_pvalue	Telomerase Signaling
423	0.082222238	NA	184	21	4h_DINCH_2_ctrlLPS	4h_ctrlLPS_pvalue	Telomere Extension by Telomerase
424	0.352433712	1.342	15	4	4h_DINCH_2_ctrlLPS	4h_ctrlLPS_pvalue	Th17 Activation Pathway
425	0	NA	119	19	4h_DINCH_2_ctrlLPS	4h_ctrlLPS_pvalue	Thrombin Signaling
426	0.203215654	NA	124	21	4h_DINCH_2_ctrlLPS	4h_ctrlLPS_pvalue	Tight Junction Signaling
427	0	NA	135	21	4h_DINCH_2_ctrlLPS	4h_ctrlLPS_pvalue	Triacylglycerol Degradation
428	1.232191588	0	55	21	4h_DINCH_2_ctrlLPS	4h_ctrlLPS_pvalue	tRNA Charging
429	0.450860971	NA	212	17	4h_DINCH_2_ctrlLPS	4h_ctrlLPS_pvalue	Tryptophan Degradation III (Eukaryotic)
430	0.823911222	NA	136	21	4h_DINCH_2_ctrlLPS	4h_ctrlLPS_pvalue	Tumoricidal Function of Hepatic Natural Killer Cells
431	0	NA	141	21	4h_DINCH_2_ctrlLPS	4h_ctrlLPS_pvalue	UDP-D-xylose and UDP-D-glucuronate Biosynthesis
432	0	NA	157	21	4h_DINCH_2_ctrlLPS	4h_ctrlLPS_pvalue	UDP-N-acetyl-D-galactosamine Biosynthesis I
433	1.232191588	-2.449	14	3	4h_DINCH_2_ctrlLPS	4h_ctrlLPS_pvalue	Unfolded protein response
434	0.254120835	NA	209	17	4h_DINCH_2_ctrlLPS	4h_ctrlLPS_pvalue	Valine Degradation I
435	0.083890688	NA	63	19	4h_DINCH_2_ctrlLPS	4h_ctrlLPS_pvalue	VEGF Signaling
436	2.110659166	NA	152	21	4h_DINCH_2_ctrlLPS	4h_ctrlLPS_pvalue	Virus Entry via Endocytic Pathways
437	0.453233681	NA	155	21	4h_DINCH_2_ctrlLPS	4h_ctrlLPS_pvalue	Vitamin-C Transport
438	0.453233681	0.816	70	11	4h_DINCH_2_ctrlLPS	4h_ctrlLPS_pvalue	Xenobiotic Metabolism AHR Signaling Pathway
439	0.050059497	-0.447	115	17	4h_DINCH_2_ctrlLPS	4h_ctrlLPS_pvalue	Xenobiotic Metabolism CAR Signaling Pathway
440	0.1610099	0.378	39	11	4h_DINCH_2_ctrlLPS	4h_ctrlLPS_pvalue	Xenobiotic Metabolism PXR Signaling Pathway
441	0.138724704	NA	33	21	4h_DINCH_2_ctrlLPS	4h_ctrlLPS_pvalue	Xenobiotic Metabolism Signaling
442	0.20267511	NA	186	21	4h_DINCH_2_ctrlLPS	4h_ctrlLPS_pvalue	Zymosterol Biosynthesis
443	0.336748094	NA	221	18	4h_DINCH_3_ctrlLPS	4h_ctrlLPS_pvalue	?-Adrenergic Signaling
444	0.527923806	NA	138	21	4h_DINCH_3_ctrlLPS	4h_ctrlLPS_pvalue	?-glutamyl Cycle
445	0.406160139	-2	11	8	4h_DINCH_3_ctrlLPS	4h_ctrlLPS_pvalue	14-3-3-mediated Signaling
446	0.351790013	NA	194	21	4h_DINCH_3_ctrlLPS	4h_ctrlLPS_pvalue	2-ketoglutarate Dehydrogenase Complex
447	0.704651674	NA	130	21	4h_DINCH_3_ctrlLPS	4h_ctrlLPS_pvalue	Acetyl-CoA Biosynthesis I (Pyruvate Dehydrogenase Complex)
448	0	NA	160	21	4h_DINCH_3_ctrlLPS	4h_ctrlLPS_pvalue	Acetyl-CoA Biosynthesis III (from Citrate)
449	0.209219551	-2.236	2	3	4h_DINCH_3_ctrlLPS	4h_ctrlLPS_pvalue	Actin Cytoskeleton Signaling
450	0.33041268	-1	114	15	4h_DINCH_3_ctrlLPS	4h_ctrlLPS_pvalue	Actin Nucleation by ARP-WASP Complex
451	0.527923806	NA	154	21	4h_DINCH_3_ctrlLPS	4h_ctrlLPS_pvalue	Acyl Carrier Protein Metabolism
452	0.527923806	NA	150	21	4h_DINCH_3_ctrlLPS	4h_ctrlLPS_pvalue	Adenine and Adenosine Salvage VI
453	0.244129752	NA	28	21	4h_DINCH_3_ctrlLPS	4h_ctrlLPS_pvalue	Agranulocyte Adhesion and Diapedesis
454	0.95468103	NA	147	21	4h_DINCH_3_ctrlLPS	4h_ctrlLPS_pvalue	Aldosterone Signaling in Epithelial Cells
455	0.439892738	2.121	60	16	4h_DINCH_3_ctrlLPS	4h_ctrlLPS_pvalue	AMPK Signaling
456	0.315589584	NA	171	21	4h_DINCH_3_ctrlLPS	4h_ctrlLPS_pvalue	Amyloid Processing
457	0	NA	199	18	4h_DINCH_3_ctrlLPS	4h_ctrlLPS_pvalue	Angiopoietin Signaling
458	0.351790013	NA	32	21	4h_DINCH_3_ctrlLPS	4h_ctrlLPS_pvalue	Antigen Presentation Pathway
459	0	NA	75	19	4h_DINCH_3_ctrlLPS	4h_ctrlLPS_pvalue	Antiproliferative Role of Somatostatin Receptor 2
460	0	NA	116	22	4h_DINCH_3_ctrlLPS	4h_ctrlLPS_pvalue	Antiproliferative Role of TOB in T Cell Signaling
461	0.175697044	NA	71	14	4h_DINCH_3_ctrlLPS	4h_ctrlLPS_pvalue	Apelin Adipocyte Signaling Pathway
462	0	NA	69	12	4h_DINCH_3_ctrlLPS	4h_ctrlLPS_pvalue	Apelin Cardiomyocyte Signaling Pathway
463	0.780614443	0	214	21	4h_DINCH_3_ctrlLPS	4h_ctrlLPS_pvalue	Apoptosis Signaling
464	0	NA	131	21	4h_DINCH_3_ctrlLPS	4h_ctrlLPS_pvalue	Arginine Biosynthesis IV
465	0.844783743	1.342	68	11	4h_DINCH_3_ctrlLPS	4h_ctrlLPS_pvalue	Aryl Hydrocarbon Receptor Signaling
466	0.324903355	NA	140	21	4h_DINCH_3_ctrlLPS	4h_ctrlLPS_pvalue	Aspartate Degradation II
467	0	NA	26	21	4h_DINCH_3_ctrlLPS	4h_ctrlLPS_pvalue	Axonal Guidance Signaling
468	2.839300076	-0.707	9	6	4h_DINCH_3_ctrlLPS	4h_ctrlLPS_pvalue	BAG2 Signaling Pathway
469	0.439892738	NA	190	21	4h_DINCH_3_ctrlLPS	4h_ctrlLPS_pvalue	BER pathway
470	0.351790013	NA	151	21	4h_DINCH_3_ctrlLPS	4h_ctrlLPS_pvalue	Branched-chain ?-keto acid Dehydrogenase Complex
471	0.244129752	NA	201	21	4h_DINCH_3_ctrlLPS	4h_ctrlLPS_pvalue	Calcium-induced T Lymphocyte Apoptosis
472	0.336748094	NA	104	18	4h_DINCH_3_ctrlLPS	4h_ctrlLPS_pvalue	Calcium Signaling
473	0	NA	208	18	4h_DINCH_3_ctrlLPS	4h_ctrlLPS_pvalue	Cardiac ?-adrenergic Signaling
474	0.336748094	0	58	21	4h_DINCH_3_ctrlLPS	4h_ctrlLPS_pvalue	Cardiac Hypertrophy Signaling
475	0.423847095	NA	188	21	4h_DINCH_3_ctrlLPS	4h_ctrlLPS_pvalue	Caveolar-mediated Endocytosis Signaling
476	0.139625815	NA	18	21	4h_DINCH_3_ctrlLPS	4h_ctrlLPS_pvalue	CCR3 Signaling in Eosinophils
477	0.336748094	-1.342	112	19	4h_DINCH_3_ctrlLPS	4h_ctrlLPS_pvalue	CD28 Signaling in T Helper Cells
478	0.225750132	NA	17	21	4h_DINCH_3_ctrlLPS	4h_ctrlLPS_pvalue	CD40 Signaling
479	0	NA	7	6	4h_DINCH_3_ctrlLPS	4h_ctrlLPS_pvalue	Cdc42 Signaling
480	0.272342214	NA	204	20	4h_DINCH_3_ctrlLPS	4h_ctrlLPS_pvalue	Cell Cycle Control of Chromosomal Replication
481	0.310939518	NA	31	21	4h_DINCH_3_ctrlLPS	4h_ctrlLPS_pvalue	Cell Cycle: G2/M DNA Damage Checkpoint Regulation
482	0.129286677	NA	90	19	4h_DINCH_3_ctrlLPS	4h_ctrlLPS_pvalue	Ceramide Signaling
483	0	NA	92	19	4h_DINCH_3_ctrlLPS	4h_ctrlLPS_pvalue	Chemokine Signaling
484	0	NA	125	21	4h_DINCH_3_ctrlLPS	4h_ctrlLPS_pvalue	Chronic Myeloid Leukemia Signaling
485	0.336748094	NA	16	21	4h_DINCH_3_ctrlLPS	4h_ctrlLPS_pvalue	Citrulline Biosynthesis
486	0.704651674	NA	175	21	4h_DINCH_3_ctrlLPS	4h_ctrlLPS_pvalue	Clathrin-mediated Endocytosis Signaling
487	0.300882408	1	94	16	4h_DINCH_3_ctrlLPS	4h_ctrlLPS_pvalue	Colorectal Cancer Metastasis Signaling
488	3.758530092	2	1	1	4h_DINCH_3_ctrlLPS	4h_ctrlLPS_pvalue	Coronavirus Pathogenesis Pathway
489	0.35148632	NA	158	21	4h_DINCH_3_ctrlLPS	4h_ctrlLPS_pvalue	Crosstalk between Dendritic Cells and Natural Killer Cells
490	0	NA	127	21	4h_DINCH_3_ctrlLPS	4h_ctrlLPS_pvalue	CTLA4 Signaling in Cytotoxic T Lymphocytes
491	0.225750132	-0.816	43	19	4h_DINCH_3_ctrlLPS	4h_ctrlLPS_pvalue	CXCR4 Signaling
492	0	NA	22	21	4h_DINCH_3_ctrlLPS	4h_ctrlLPS_pvalue	Cysteine Biosynthesis III (mammalia)
493	0.270093306	NA	23	21	4h_DINCH_3_ctrlLPS	4h_ctrlLPS_pvalue	Cytotoxic T Lymphocyte-mediated Apoptosis of Target Cells
494	0	NA	183	21	4h_DINCH_3_ctrlLPS	4h_ctrlLPS_pvalue	D-mannose Degradation
495	0.574771649	-0.378	110	21	4h_DINCH_3_ctrlLPS	4h_ctrlLPS_pvalue	Death Receptor Signaling
496	0.807524336	NA	191	21	4h_DINCH_3_ctrlLPS	4h_ctrlLPS_pvalue	DNA Double-Strand Break Repair by Non-Homologous End Joining
497	0.527923806	NA	177	21	4h_DINCH_3_ctrlLPS	4h_ctrlLPS_pvalue	Dopamine Degradation
498	7.110393187	-1.897	4	2	4h_DINCH_3_ctrlLPS	4h_ctrlLPS_pvalue	EIF2 Signaling
499	1.853970578	-0.447	198	21	4h_DINCH_3_ctrlLPS	4h_ctrlLPS_pvalue	Endoplasmic Reticulum Stress Pathway
500	0.324903355	NA	217	17	4h_DINCH_3_ctrlLPS	4h_ctrlLPS_pvalue	Ephrin B Signaling
501	0	-1.342	46	5	4h_DINCH_3_ctrlLPS	4h_ctrlLPS_pvalue	Ephrin Receptor Signaling
502	0.439892738	NA	179	21	4h_DINCH_3_ctrlLPS	4h_ctrlLPS_pvalue	Epithelial Adherens Junction Signaling
503	0	NA	99	19	4h_DINCH_3_ctrlLPS	4h_ctrlLPS_pvalue	ERK/MAPK Signaling
504	0	NA	83	15	4h_DINCH_3_ctrlLPS	4h_ctrlLPS_pvalue	ERK5 Signaling
505	0	NA	192	21	4h_DINCH_3_ctrlLPS	4h_ctrlLPS_pvalue	Estrogen Biosynthesis
506	0.527923806	0.258	93	19	4h_DINCH_3_ctrlLPS	4h_ctrlLPS_pvalue	Estrogen Receptor Signaling
507	0.324903355	NA	98	20	4h_DINCH_3_ctrlLPS	4h_ctrlLPS_pvalue	FAT10 Cancer Signaling Pathway
508	1.269608203	1	205	16	4h_DINCH_3_ctrlLPS	4h_ctrlLPS_pvalue	FAT10 Signaling Pathway
509	0.287822564	NA	38	19	4h_DINCH_3_ctrlLPS	4h_ctrlLPS_pvalue	Fatty Acid ?-oxidation I
510	0.099800568	NA	12	9	4h_DINCH_3_ctrlLPS	4h_ctrlLPS_pvalue	Fc? Receptor-mediated Phagocytosis in Macrophages and Monocytes
511	0.409057189	-1.134	108	7	4h_DINCH_3_ctrlLPS	4h_ctrlLPS_pvalue	fMLP Signaling in Neutrophils
512	0.336748094	NA	166	21	4h_DINCH_3_ctrlLPS	4h_ctrlLPS_pvalue	Folate Polyglutamylation
513	0.270093306	NA	10	21	4h_DINCH_3_ctrlLPS	4h_ctrlLPS_pvalue	Folate Transformations I
514	0.092068578	NA	128	21	4h_DINCH_3_ctrlLPS	4h_ctrlLPS_pvalue	G Protein Signaling Mediated by Tubby
515	0.698041915	-1.265	45	20	4h_DINCH_3_ctrlLPS	4h_ctrlLPS_pvalue	G?q Signaling
516	0.527923806	NA	178	21	4h_DINCH_3_ctrlLPS	4h_ctrlLPS_pvalue	Germ Cell-Sertoli Cell Junction Signaling
517	0.324903355	0	101	18	4h_DINCH_3_ctrlLPS	4h_ctrlLPS_pvalue	Glioma Invasiveness Signaling
518	0	NA	172	21	4h_DINCH_3_ctrlLPS	4h_ctrlLPS_pvalue	Glucocorticoid Receptor Signaling
519	0.336748094	NA	102	13	4h_DINCH_3_ctrlLPS	4h_ctrlLPS_pvalue	Gluconeogenesis I
520	0.420302375	NA	118	21	4h_DINCH_3_ctrlLPS	4h_ctrlLPS_pvalue	Glutamate Receptor Signaling
521	0.527923806	NA	62	21	4h_DINCH_3_ctrlLPS	4h_ctrlLPS_pvalue	Glutamate Removal from Folates
522	0.527923806	NA	169	21	4h_DINCH_3_ctrlLPS	4h_ctrlLPS_pvalue	Glutamine Degradation I
523	0.402311309	NA	215	17	4h_DINCH_3_ctrlLPS	4h_ctrlLPS_pvalue	Glutaryl-CoA Degradation
524	0.338504993	NA	207	21	4h_DINCH_3_ctrlLPS	4h_ctrlLPS_pvalue	Glutathione-mediated Detoxification
525	0.402311309	NA	126	21	4h_DINCH_3_ctrlLPS	4h_ctrlLPS_pvalue	Glutathione Biosynthesis
526	0	NA	195	21	4h_DINCH_3_ctrlLPS	4h_ctrlLPS_pvalue	Glutathione Redox Reactions I
527	0	NA	27	21	4h_DINCH_3_ctrlLPS	4h_ctrlLPS_pvalue	Glutathione Redox Reactions II
528	0.324903355	NA	193	21	4h_DINCH_3_ctrlLPS	4h_ctrlLPS_pvalue	Glycine Cleavage Complex
529	0.423847095	NA	167	21	4h_DINCH_3_ctrlLPS	4h_ctrlLPS_pvalue	Glycine Degradation (Creatine Biosynthesis)
530	0.704651674	NA	148	21	4h_DINCH_3_ctrlLPS	4h_ctrlLPS_pvalue	Glycogen Biosynthesis II (from UDP-D-Glucose)
531	2.778492282	0.816	56	13	4h_DINCH_3_ctrlLPS	4h_ctrlLPS_pvalue	Glycolysis I
532	0.202785442	NA	40	18	4h_DINCH_3_ctrlLPS	4h_ctrlLPS_pvalue	GM-CSF Signaling
533	0.195350738	NA	153	21	4h_DINCH_3_ctrlLPS	4h_ctrlLPS_pvalue	Granzyme A Signaling
534	0.704651674	NA	139	21	4h_DINCH_3_ctrlLPS	4h_ctrlLPS_pvalue	Granzyme B Signaling
535	0	NA	196	21	4h_DINCH_3_ctrlLPS	4h_ctrlLPS_pvalue	Heme Biosynthesis II
536	0.336748094	-1	85	19	4h_DINCH_3_ctrlLPS	4h_ctrlLPS_pvalue	HIF1? Signaling
537	0.270093306	NA	52	20	4h_DINCH_3_ctrlLPS	4h_ctrlLPS_pvalue	HIPPO signaling
538	0.439892738	1.342	107	11	4h_DINCH_3_ctrlLPS	4h_ctrlLPS_pvalue	Huntington's Disease Signaling
539	0.402311309	NA	159	21	4h_DINCH_3_ctrlLPS	4h_ctrlLPS_pvalue	Hypoxia Signaling in the Cardiovascular System
540	0.287822564	NA	64	18	4h_DINCH_3_ctrlLPS	4h_ctrlLPS_pvalue	IGF-1 Signaling
541	0.420883659	NA	176	21	4h_DINCH_3_ctrlLPS	4h_ctrlLPS_pvalue	IL-10 Signaling
542	0.402311309	0.447	117	20	4h_DINCH_3_ctrlLPS	4h_ctrlLPS_pvalue	IL-15 Signaling
543	0.439892738	0	213	20	4h_DINCH_3_ctrlLPS	4h_ctrlLPS_pvalue	IL-17A Signaling in Airway Cells
544	0.439892738	1	49	20	4h_DINCH_3_ctrlLPS	4h_ctrlLPS_pvalue	IL-23 Signaling Pathway
545	0	NA	72	20	4h_DINCH_3_ctrlLPS	4h_ctrlLPS_pvalue	IL-3 Signaling
546	0.704651674	-1.732	5	5	4h_DINCH_3_ctrlLPS	4h_ctrlLPS_pvalue	IL-8 Signaling
547	0.97669257	0	96	7	4h_DINCH_3_ctrlLPS	4h_ctrlLPS_pvalue	ILK Signaling
548	0.45959743	-0.447	35	19	4h_DINCH_3_ctrlLPS	4h_ctrlLPS_pvalue	Induction of Apoptosis by HIV1
549	0.338504993	NA	134	21	4h_DINCH_3_ctrlLPS	4h_ctrlLPS_pvalue	Inflammasome pathway
550	0.527923806	0	89	12	4h_DINCH_3_ctrlLPS	4h_ctrlLPS_pvalue	Inhibition of ARE-Mediated mRNA Degradation Pathway
551	0.439892738	NA	30	21	4h_DINCH_3_ctrlLPS	4h_ctrlLPS_pvalue	iNOS Signaling
552	0.402311309	1	84	12	4h_DINCH_3_ctrlLPS	4h_ctrlLPS_pvalue	Insulin Secretion Signaling Pathway
553	0.336748094	-0.707	105	15	4h_DINCH_3_ctrlLPS	4h_ctrlLPS_pvalue	Integrin Signaling
554	0.244129752	NA	203	20	4h_DINCH_3_ctrlLPS	4h_ctrlLPS_pvalue	Interferon Signaling
555	0.324903355	NA	143	21	4h_DINCH_3_ctrlLPS	4h_ctrlLPS_pvalue	Iron homeostasis signaling pathway
556	0.402311309	NA	74	17	4h_DINCH_3_ctrlLPS	4h_ctrlLPS_pvalue	Isoleucine Degradation I
557	0.354557	0.447	95	20	4h_DINCH_3_ctrlLPS	4h_ctrlLPS_pvalue	JAK/Stat Signaling
558	0.439892738	NA	202	21	4h_DINCH_3_ctrlLPS	4h_ctrlLPS_pvalue	Ketogenesis
559	0.527923806	NA	180	21	4h_DINCH_3_ctrlLPS	4h_ctrlLPS_pvalue	Ketolysis
560	0	NA	182	21	4h_DINCH_3_ctrlLPS	4h_ctrlLPS_pvalue	Lactose Degradation III
561	0.527923806	NA	163	21	4h_DINCH_3_ctrlLPS	4h_ctrlLPS_pvalue	Leucine Degradation I
562	0.119332424	-1.342	57	5	4h_DINCH_3_ctrlLPS	4h_ctrlLPS_pvalue	Leukocyte Extravasation Signaling
563	0.116427716	NA	41	21	4h_DINCH_3_ctrlLPS	4h_ctrlLPS_pvalue	Lipid Antigen Presentation by CD1
564	0.474300854	-0.447	67	22	4h_DINCH_3_ctrlLPS	4h_ctrlLPS_pvalue	LXR/RXR Activation
565	0.2086121	NA	19	21	4h_DINCH_3_ctrlLPS	4h_ctrlLPS_pvalue	Mechanisms of Viral Exit from Host Cells
566	0	NA	129	21	4h_DINCH_3_ctrlLPS	4h_ctrlLPS_pvalue	Methionine Degradation I (to Homocysteine)
567	0.527923806	NA	162	21	4h_DINCH_3_ctrlLPS	4h_ctrlLPS_pvalue	Methylthiopropionate Biosynthesis
568	0.221290327	NA	111	17	4h_DINCH_3_ctrlLPS	4h_ctrlLPS_pvalue	Mevalonate Pathway I
569	4.157062581	NA	168	21	4h_DINCH_3_ctrlLPS	4h_ctrlLPS_pvalue	Mitochondrial Dysfunction
570	0.244129752	NA	25	21	4h_DINCH_3_ctrlLPS	4h_ctrlLPS_pvalue	Mitotic Roles of Polo-Like Kinase
571	2.781134444	-0.447	50	18	4h_DINCH_3_ctrlLPS	4h_ctrlLPS_pvalue	mTOR Signaling
572	0.527923806	0.302	97	17	4h_DINCH_3_ctrlLPS	4h_ctrlLPS_pvalue	Natural Killer Cell Signaling
573	0.244129752	-1.633	29	10	4h_DINCH_3_ctrlLPS	4h_ctrlLPS_pvalue	Necroptosis Signaling Pathway
574	0.102945137	NA	109	18	4h_DINCH_3_ctrlLPS	4h_ctrlLPS_pvalue	Neuregulin Signaling
575	0.439892738	1.342	210	16	4h_DINCH_3_ctrlLPS	4h_ctrlLPS_pvalue	Neuroprotective Role of THOP1 in Alzheimer's Disease
576	1.009479267	-1.89	6	3	4h_DINCH_3_ctrlLPS	4h_ctrlLPS_pvalue	NRF2-mediated Oxidative Stress Response
577	0.244129752	NA	161	21	4h_DINCH_3_ctrlLPS	4h_ctrlLPS_pvalue	Nucleotide Excision Repair Pathway
578	3.010340038	-1.941	81	5	4h_DINCH_3_ctrlLPS	4h_ctrlLPS_pvalue	Oxidative Phosphorylation
579	0.315589584	0.816	80	20	4h_DINCH_3_ctrlLPS	4h_ctrlLPS_pvalue	P2Y Purigenic Receptor Signaling Pathway
580	0.226059282	NA	53	12	4h_DINCH_3_ctrlLPS	4h_ctrlLPS_pvalue	p70S6K Signaling
581	0.351790013	-0.447	200	21	4h_DINCH_3_ctrlLPS	4h_ctrlLPS_pvalue	Pancreatic Adenocarcinoma Signaling
582	0.244129752	NA	123	21	4h_DINCH_3_ctrlLPS	4h_ctrlLPS_pvalue	Parkinson's Signaling
583	0	NA	66	13	4h_DINCH_3_ctrlLPS	4h_ctrlLPS_pvalue	Paxillin Signaling
584	0.133790979	NA	88	20	4h_DINCH_3_ctrlLPS	4h_ctrlLPS_pvalue	PDGF Signaling
585	0.25031327	NA	219	17	4h_DINCH_3_ctrlLPS	4h_ctrlLPS_pvalue	Pentose Phosphate Pathway
586	0.324903355	NA	181	21	4h_DINCH_3_ctrlLPS	4h_ctrlLPS_pvalue	Pentose Phosphate Pathway (Non-oxidative Branch)
587	0	NA	189	21	4h_DINCH_3_ctrlLPS	4h_ctrlLPS_pvalue	Pentose Phosphate Pathway (Oxidative Branch)
588	0.439892738	0	149	21	4h_DINCH_3_ctrlLPS	4h_ctrlLPS_pvalue	PFKFB4 Signaling Pathway
589	1.132764022	NA	174	21	4h_DINCH_3_ctrlLPS	4h_ctrlLPS_pvalue	Phagosome Maturation
590	0.95468103	NA	132	21	4h_DINCH_3_ctrlLPS	4h_ctrlLPS_pvalue	Phenylalanine Degradation IV (Mammalian, via Side Chain)
591	1.132764022	NA	146	21	4h_DINCH_3_ctrlLPS	4h_ctrlLPS_pvalue	Phenylethylamine Degradation I
592	0.462229301	-0.333	13	7	4h_DINCH_3_ctrlLPS	4h_ctrlLPS_pvalue	PI3K/AKT Signaling
593	0.338504993	NA	8	21	4h_DINCH_3_ctrlLPS	4h_ctrlLPS_pvalue	Polyamine Regulation in Colon Cancer
594	0.315589584	0.447	48	11	4h_DINCH_3_ctrlLPS	4h_ctrlLPS_pvalue	PPAR Signaling
595	0.324903355	0	54	20	4h_DINCH_3_ctrlLPS	4h_ctrlLPS_pvalue	PPAR?/RXR? Activation
596	0.244129752	-0.378	61	20	4h_DINCH_3_ctrlLPS	4h_ctrlLPS_pvalue	Production of Nitric Oxide and Reactive Oxygen Species in Macrophages
597	0.336748094	NA	185	21	4h_DINCH_3_ctrlLPS	4h_ctrlLPS_pvalue	Prostate Cancer Signaling
598	0.344646653	-0.905	44	19	4h_DINCH_3_ctrlLPS	4h_ctrlLPS_pvalue	Protein Kinase A Signaling
599	2.939305146	NA	137	21	4h_DINCH_3_ctrlLPS	4h_ctrlLPS_pvalue	Protein Ubiquitination Pathway
600	0.244129752	NA	120	21	4h_DINCH_3_ctrlLPS	4h_ctrlLPS_pvalue	Purine Nucleotides De Novo Biosynthesis II
601	0	NA	142	21	4h_DINCH_3_ctrlLPS	4h_ctrlLPS_pvalue	Pyruvate Fermentation to Lactate
602	0.439892738	-1.134	21	5	4h_DINCH_3_ctrlLPS	4h_ctrlLPS_pvalue	Rac Signaling
603	0.402311309	NA	156	21	4h_DINCH_3_ctrlLPS	4h_ctrlLPS_pvalue	RAN Signaling
604	0.287822564	NA	122	21	4h_DINCH_3_ctrlLPS	4h_ctrlLPS_pvalue	RAR Activation
605	0.324903355	-0.447	82	19	4h_DINCH_3_ctrlLPS	4h_ctrlLPS_pvalue	Reelin Signaling in Neurons
606	0.402311309	-1.342	86	5	4h_DINCH_3_ctrlLPS	4h_ctrlLPS_pvalue	Regulation of Actin-based Motility by Rho
607	0	NA	165	21	4h_DINCH_3_ctrlLPS	4h_ctrlLPS_pvalue	Regulation of Cellular Mechanics by Calpain Protease
608	4.060440816	NA	76	19	4h_DINCH_3_ctrlLPS	4h_ctrlLPS_pvalue	Regulation of eIF4 and p70S6K Signaling
609	0.324903355	0	103	20	4h_DINCH_3_ctrlLPS	4h_ctrlLPS_pvalue	Regulation Of The Epithelial Mesenchymal Transition By Growth Factors Pathway
610	0.2666821	0.447	106	18	4h_DINCH_3_ctrlLPS	4h_ctrlLPS_pvalue	Relaxin Signaling
611	0.441071142	NA	87	15	4h_DINCH_3_ctrlLPS	4h_ctrlLPS_pvalue	Remodeling of Epithelial Adherens Junctions
612	0	NA	211	18	4h_DINCH_3_ctrlLPS	4h_ctrlLPS_pvalue	Renal Cell Carcinoma Signaling
613	0.270093306	-1.342	3	3	4h_DINCH_3_ctrlLPS	4h_ctrlLPS_pvalue	RhoA Signaling
614	0.439892738	1.89	65	4	4h_DINCH_3_ctrlLPS	4h_ctrlLPS_pvalue	RhoGDI Signaling
615	0.226630677	NA	187	21	4h_DINCH_3_ctrlLPS	4h_ctrlLPS_pvalue	Role of IL-17A in Psoriasis
616	0.462229301	0	173	21	4h_DINCH_3_ctrlLPS	4h_ctrlLPS_pvalue	Role of IL-17F in Allergic Inflammatory Airway Diseases
617	0.495847723	NA	121	21	4h_DINCH_3_ctrlLPS	4h_ctrlLPS_pvalue	Role of JAK1, JAK2 and TYK2 in Interferon Signaling
618	0	0.447	73	18	4h_DINCH_3_ctrlLPS	4h_ctrlLPS_pvalue	Role of NFAT in Cardiac Hypertrophy
619	0.402311309	-1	216	19	4h_DINCH_3_ctrlLPS	4h_ctrlLPS_pvalue	Role of PI3K/AKT Signaling in the Pathogenesis of Influenza
620	1.132764022	0.632	36	4	4h_DINCH_3_ctrlLPS	4h_ctrlLPS_pvalue	Role of PKR in Interferon Induction and Antiviral Response
621	0.146881069	NA	164	21	4h_DINCH_3_ctrlLPS	4h_ctrlLPS_pvalue	Role of Tissue Factor in Cancer
622	0	NA	144	21	4h_DINCH_3_ctrlLPS	4h_ctrlLPS_pvalue	S-adenosyl-L-methionine Biosynthesis
623	0	NA	59	21	4h_DINCH_3_ctrlLPS	4h_ctrlLPS_pvalue	SAPK/JNK Signaling
624	0.324903355	NA	24	21	4h_DINCH_3_ctrlLPS	4h_ctrlLPS_pvalue	Selenocysteine Biosynthesis II (Archaea and Eukaryotes)
625	0.402311309	NA	20	21	4h_DINCH_3_ctrlLPS	4h_ctrlLPS_pvalue	Semaphorin Signaling in Neurons
626	0.351790013	NA	133	21	4h_DINCH_3_ctrlLPS	4h_ctrlLPS_pvalue	Serine Biosynthesis
627	1.132764022	-0.832	42	5	4h_DINCH_3_ctrlLPS	4h_ctrlLPS_pvalue	Signaling by Rho Family GTPases
628	5.866249428	-1.225	113	10	4h_DINCH_3_ctrlLPS	4h_ctrlLPS_pvalue	Sirtuin Signaling Pathway
629	0	NA	145	21	4h_DINCH_3_ctrlLPS	4h_ctrlLPS_pvalue	Sorbitol Degradation I
630	0	NA	206	18	4h_DINCH_3_ctrlLPS	4h_ctrlLPS_pvalue	SPINK1 Pancreatic Cancer Pathway
631	0	NA	51	15	4h_DINCH_3_ctrlLPS	4h_ctrlLPS_pvalue	Spliceosomal Cycle
632	1.269608203	NA	37	21	4h_DINCH_3_ctrlLPS	4h_ctrlLPS_pvalue	Sucrose Degradation V (Mammalian)
633	0.527923806	NA	170	21	4h_DINCH_3_ctrlLPS	4h_ctrlLPS_pvalue	Sulfate Activation for Sulfonation
634	0.310939518	-1	77	10	4h_DINCH_3_ctrlLPS	4h_ctrlLPS_pvalue	Sumoylation Pathway
635	1.269608203	NA	218	19	4h_DINCH_3_ctrlLPS	4h_ctrlLPS_pvalue	Superoxide Radicals Degradation
636	0.423847095	NA	100	17	4h_DINCH_3_ctrlLPS	4h_ctrlLPS_pvalue	Superpathway of Cholesterol Biosynthesis
637	0.373006826	NA	220	17	4h_DINCH_3_ctrlLPS	4h_ctrlLPS_pvalue	Superpathway of Geranylgeranyldiphosphate Biosynthesis I (via Mevalonate)
638	0.270093306	NA	197	21	4h_DINCH_3_ctrlLPS	4h_ctrlLPS_pvalue	Superpathway of Methionine Degradation
639	0.324903355	NA	34	21	4h_DINCH_3_ctrlLPS	4h_ctrlLPS_pvalue	Superpathway of Serine and Glycine Biosynthesis I
640	0	0.447	78	18	4h_DINCH_3_ctrlLPS	4h_ctrlLPS_pvalue	Synaptogenesis Signaling Pathway
641	0.336748094	NA	79	15	4h_DINCH_3_ctrlLPS	4h_ctrlLPS_pvalue	TCA Cycle II (Eukaryotic)
642	0.304870242	0.447	47	11	4h_DINCH_3_ctrlLPS	4h_ctrlLPS_pvalue	Tec Kinase Signaling
643	0	NA	91	7	4h_DINCH_3_ctrlLPS	4h_ctrlLPS_pvalue	Telomerase Signaling
644	0	NA	184	21	4h_DINCH_3_ctrlLPS	4h_ctrlLPS_pvalue	Telomere Extension by Telomerase
645	1.009479267	1.89	15	4	4h_DINCH_3_ctrlLPS	4h_ctrlLPS_pvalue	Th17 Activation Pathway
646	0.276519848	-1.134	119	19	4h_DINCH_3_ctrlLPS	4h_ctrlLPS_pvalue	Thrombin Signaling
647	0.336748094	NA	124	21	4h_DINCH_3_ctrlLPS	4h_ctrlLPS_pvalue	Tight Junction Signaling
648	0	NA	135	21	4h_DINCH_3_ctrlLPS	4h_ctrlLPS_pvalue	Triacylglycerol Degradation
649	0.527923806	0	55	21	4h_DINCH_3_ctrlLPS	4h_ctrlLPS_pvalue	tRNA Charging
650	0.324903355	NA	212	17	4h_DINCH_3_ctrlLPS	4h_ctrlLPS_pvalue	Tryptophan Degradation III (Eukaryotic)
651	0.324903355	NA	136	21	4h_DINCH_3_ctrlLPS	4h_ctrlLPS_pvalue	Tumoricidal Function of Hepatic Natural Killer Cells
652	0	NA	141	21	4h_DINCH_3_ctrlLPS	4h_ctrlLPS_pvalue	UDP-D-xylose and UDP-D-glucuronate Biosynthesis
653	0	NA	157	21	4h_DINCH_3_ctrlLPS	4h_ctrlLPS_pvalue	UDP-N-acetyl-D-galactosamine Biosynthesis I
654	0.844783743	-1.342	14	3	4h_DINCH_3_ctrlLPS	4h_ctrlLPS_pvalue	Unfolded protein response
655	0.144420025	NA	209	17	4h_DINCH_3_ctrlLPS	4h_ctrlLPS_pvalue	Valine Degradation I
656	0.324903355	NA	63	19	4h_DINCH_3_ctrlLPS	4h_ctrlLPS_pvalue	VEGF Signaling
657	0.704651674	NA	152	21	4h_DINCH_3_ctrlLPS	4h_ctrlLPS_pvalue	Virus Entry via Endocytic Pathways
658	0.139625815	NA	155	21	4h_DINCH_3_ctrlLPS	4h_ctrlLPS_pvalue	Vitamin-C Transport
659	1.269608203	1.414	70	11	4h_DINCH_3_ctrlLPS	4h_ctrlLPS_pvalue	Xenobiotic Metabolism AHR Signaling Pathway
660	0.230382005	0.816	115	17	4h_DINCH_3_ctrlLPS	4h_ctrlLPS_pvalue	Xenobiotic Metabolism CAR Signaling Pathway
661	0.221290327	1.633	39	11	4h_DINCH_3_ctrlLPS	4h_ctrlLPS_pvalue	Xenobiotic Metabolism PXR Signaling Pathway
662	0.336748094	NA	33	21	4h_DINCH_3_ctrlLPS	4h_ctrlLPS_pvalue	Xenobiotic Metabolism Signaling
663	0.324903355	NA	186	21	4h_DINCH_3_ctrlLPS	4h_ctrlLPS_pvalue	Zymosterol Biosynthesis
664	0.373480004	NA	221	18	4h_DINCH_4_ctrlLPS	4h_ctrlLPS_pvalue	?-Adrenergic Signaling
665	0.233372177	NA	138	21	4h_DINCH_4_ctrlLPS	4h_ctrlLPS_pvalue	?-glutamyl Cycle
666	0.228571476	-1	11	8	4h_DINCH_4_ctrlLPS	4h_ctrlLPS_pvalue	14-3-3-mediated Signaling
667	0.382632229	NA	194	21	4h_DINCH_4_ctrlLPS	4h_ctrlLPS_pvalue	2-ketoglutarate Dehydrogenase Complex
668	0.74171285	NA	130	21	4h_DINCH_4_ctrlLPS	4h_ctrlLPS_pvalue	Acetyl-CoA Biosynthesis I (Pyruvate Dehydrogenase Complex)
669	0	NA	160	21	4h_DINCH_4_ctrlLPS	4h_ctrlLPS_pvalue	Acetyl-CoA Biosynthesis III (from Citrate)
670	1.223501373	-1.807	2	3	4h_DINCH_4_ctrlLPS	4h_ctrlLPS_pvalue	Actin Cytoskeleton Signaling
671	0.382632229	-0.447	114	15	4h_DINCH_4_ctrlLPS	4h_ctrlLPS_pvalue	Actin Nucleation by ARP-WASP Complex
672	0.554023504	NA	154	21	4h_DINCH_4_ctrlLPS	4h_ctrlLPS_pvalue	Acyl Carrier Protein Metabolism
673	0.554023504	NA	150	21	4h_DINCH_4_ctrlLPS	4h_ctrlLPS_pvalue	Adenine and Adenosine Salvage VI
674	0.595170911	NA	28	21	4h_DINCH_4_ctrlLPS	4h_ctrlLPS_pvalue	Agranulocyte Adhesion and Diapedesis
675	1.13836503	NA	147	21	4h_DINCH_4_ctrlLPS	4h_ctrlLPS_pvalue	Aldosterone Signaling in Epithelial Cells
676	0.415188453	0.632	60	16	4h_DINCH_4_ctrlLPS	4h_ctrlLPS_pvalue	AMPK Signaling
677	0.117808524	NA	171	21	4h_DINCH_4_ctrlLPS	4h_ctrlLPS_pvalue	Amyloid Processing
678	0.141975403	NA	199	18	4h_DINCH_4_ctrlLPS	4h_ctrlLPS_pvalue	Angiopoietin Signaling
679	0.331559236	NA	32	21	4h_DINCH_4_ctrlLPS	4h_ctrlLPS_pvalue	Antigen Presentation Pathway
680	0.468497485	-1	75	19	4h_DINCH_4_ctrlLPS	4h_ctrlLPS_pvalue	Antiproliferative Role of Somatostatin Receptor 2
681	0	NA	116	22	4h_DINCH_4_ctrlLPS	4h_ctrlLPS_pvalue	Antiproliferative Role of TOB in T Cell Signaling
682	1.284844581	-2.121	71	14	4h_DINCH_4_ctrlLPS	4h_ctrlLPS_pvalue	Apelin Adipocyte Signaling Pathway
683	0.257259979	-1.342	69	12	4h_DINCH_4_ctrlLPS	4h_ctrlLPS_pvalue	Apelin Cardiomyocyte Signaling Pathway
684	0.434670691	-0.816	214	21	4h_DINCH_4_ctrlLPS	4h_ctrlLPS_pvalue	Apoptosis Signaling
685	0	NA	131	21	4h_DINCH_4_ctrlLPS	4h_ctrlLPS_pvalue	Arginine Biosynthesis IV
686	1.111867676	0.816	68	11	4h_DINCH_4_ctrlLPS	4h_ctrlLPS_pvalue	Aryl Hydrocarbon Receptor Signaling
687	0.74171285	NA	140	21	4h_DINCH_4_ctrlLPS	4h_ctrlLPS_pvalue	Aspartate Degradation II
688	0	NA	26	21	4h_DINCH_4_ctrlLPS	4h_ctrlLPS_pvalue	Axonal Guidance Signaling
689	1.165117885	-0.816	9	6	4h_DINCH_4_ctrlLPS	4h_ctrlLPS_pvalue	BAG2 Signaling Pathway
690	0	NA	190	21	4h_DINCH_4_ctrlLPS	4h_ctrlLPS_pvalue	BER pathway
691	0.999938637	NA	151	21	4h_DINCH_4_ctrlLPS	4h_ctrlLPS_pvalue	Branched-chain ?-keto acid Dehydrogenase Complex
692	0.174876214	NA	201	21	4h_DINCH_4_ctrlLPS	4h_ctrlLPS_pvalue	Calcium-induced T Lymphocyte Apoptosis
693	0.306341497	NA	104	18	4h_DINCH_4_ctrlLPS	4h_ctrlLPS_pvalue	Calcium Signaling
694	0	NA	208	18	4h_DINCH_4_ctrlLPS	4h_ctrlLPS_pvalue	Cardiac ?-adrenergic Signaling
695	0.499864522	-0.277	58	21	4h_DINCH_4_ctrlLPS	4h_ctrlLPS_pvalue	Cardiac Hypertrophy Signaling
696	1.926462658	NA	188	21	4h_DINCH_4_ctrlLPS	4h_ctrlLPS_pvalue	Caveolar-mediated Endocytosis Signaling
697	0.233372177	NA	18	21	4h_DINCH_4_ctrlLPS	4h_ctrlLPS_pvalue	CCR3 Signaling in Eosinophils
698	0.541978638	-0.378	112	19	4h_DINCH_4_ctrlLPS	4h_ctrlLPS_pvalue	CD28 Signaling in T Helper Cells
699	0.257259979	0	17	21	4h_DINCH_4_ctrlLPS	4h_ctrlLPS_pvalue	CD40 Signaling
700	0.314605604	NA	7	6	4h_DINCH_4_ctrlLPS	4h_ctrlLPS_pvalue	Cdc42 Signaling
701	0	NA	204	20	4h_DINCH_4_ctrlLPS	4h_ctrlLPS_pvalue	Cell Cycle Control of Chromosomal Replication
702	0.112703541	NA	31	21	4h_DINCH_4_ctrlLPS	4h_ctrlLPS_pvalue	Cell Cycle: G2/M DNA Damage Checkpoint Regulation
703	0.262895972	-1.342	90	19	4h_DINCH_4_ctrlLPS	4h_ctrlLPS_pvalue	Ceramide Signaling
704	0.208847061	-2	92	19	4h_DINCH_4_ctrlLPS	4h_ctrlLPS_pvalue	Chemokine Signaling
705	0.291700903	NA	125	21	4h_DINCH_4_ctrlLPS	4h_ctrlLPS_pvalue	Chronic Myeloid Leukemia Signaling
706	0.845906474	NA	16	21	4h_DINCH_4_ctrlLPS	4h_ctrlLPS_pvalue	Citrulline Biosynthesis
707	1.585619352	NA	175	21	4h_DINCH_4_ctrlLPS	4h_ctrlLPS_pvalue	Clathrin-mediated Endocytosis Signaling
708	0.373480004	0.905	94	16	4h_DINCH_4_ctrlLPS	4h_ctrlLPS_pvalue	Colorectal Cancer Metastasis Signaling
709	4.409857144	3.13	1	1	4h_DINCH_4_ctrlLPS	4h_ctrlLPS_pvalue	Coronavirus Pathogenesis Pathway
710	0.74171285	0	158	21	4h_DINCH_4_ctrlLPS	4h_ctrlLPS_pvalue	Crosstalk between Dendritic Cells and Natural Killer Cells
711	0.512683839	NA	127	21	4h_DINCH_4_ctrlLPS	4h_ctrlLPS_pvalue	CTLA4 Signaling in Cytotoxic T Lymphocytes
712	0.764966549	-0.905	43	19	4h_DINCH_4_ctrlLPS	4h_ctrlLPS_pvalue	CXCR4 Signaling
713	0.133765332	NA	22	21	4h_DINCH_4_ctrlLPS	4h_ctrlLPS_pvalue	Cysteine Biosynthesis III (mammalia)
714	0.382632229	NA	23	21	4h_DINCH_4_ctrlLPS	4h_ctrlLPS_pvalue	Cytotoxic T Lymphocyte-mediated Apoptosis of Target Cells
715	0	NA	183	21	4h_DINCH_4_ctrlLPS	4h_ctrlLPS_pvalue	D-mannose Degradation
716	0.468033685	-1.134	110	21	4h_DINCH_4_ctrlLPS	4h_ctrlLPS_pvalue	Death Receptor Signaling
717	0.415188453	NA	191	21	4h_DINCH_4_ctrlLPS	4h_ctrlLPS_pvalue	DNA Double-Strand Break Repair by Non-Homologous End Joining
718	0.505183458	NA	177	21	4h_DINCH_4_ctrlLPS	4h_ctrlLPS_pvalue	Dopamine Degradation
719	9.9155092	-1.698	4	2	4h_DINCH_4_ctrlLPS	4h_ctrlLPS_pvalue	EIF2 Signaling
720	0.12518112	NA	198	21	4h_DINCH_4_ctrlLPS	4h_ctrlLPS_pvalue	Endoplasmic Reticulum Stress Pathway
721	1.111867676	-0.816	217	17	4h_DINCH_4_ctrlLPS	4h_ctrlLPS_pvalue	Ephrin B Signaling
722	0.464149885	-1.897	46	5	4h_DINCH_4_ctrlLPS	4h_ctrlLPS_pvalue	Ephrin Receptor Signaling
723	0.174876214	NA	179	21	4h_DINCH_4_ctrlLPS	4h_ctrlLPS_pvalue	Epithelial Adherens Junction Signaling
724	0.319135993	-0.707	99	19	4h_DINCH_4_ctrlLPS	4h_ctrlLPS_pvalue	ERK/MAPK Signaling
725	0	NA	83	15	4h_DINCH_4_ctrlLPS	4h_ctrlLPS_pvalue	ERK5 Signaling
726	0.415188453	NA	192	21	4h_DINCH_4_ctrlLPS	4h_ctrlLPS_pvalue	Estrogen Biosynthesis
727	1.151934831	-0.894	93	19	4h_DINCH_4_ctrlLPS	4h_ctrlLPS_pvalue	Estrogen Receptor Signaling
728	0.415188453	0	98	20	4h_DINCH_4_ctrlLPS	4h_ctrlLPS_pvalue	FAT10 Cancer Signaling Pathway
729	0.151849744	NA	205	16	4h_DINCH_4_ctrlLPS	4h_ctrlLPS_pvalue	FAT10 Signaling Pathway
730	0.734895835	-1	38	19	4h_DINCH_4_ctrlLPS	4h_ctrlLPS_pvalue	Fatty Acid ?-oxidation I
731	0.459143086	-1.89	12	9	4h_DINCH_4_ctrlLPS	4h_ctrlLPS_pvalue	Fc? Receptor-mediated Phagocytosis in Macrophages and Monocytes
732	1.111867676	-1.897	108	7	4h_DINCH_4_ctrlLPS	4h_ctrlLPS_pvalue	fMLP Signaling in Neutrophils
733	0.339118115	NA	166	21	4h_DINCH_4_ctrlLPS	4h_ctrlLPS_pvalue	Folate Polyglutamylation
734	0.233372177	NA	10	21	4h_DINCH_4_ctrlLPS	4h_ctrlLPS_pvalue	Folate Transformations I
735	0.235806035	NA	128	21	4h_DINCH_4_ctrlLPS	4h_ctrlLPS_pvalue	G Protein Signaling Mediated by Tubby
736	0.464695823	0.333	45	20	4h_DINCH_4_ctrlLPS	4h_ctrlLPS_pvalue	G?q Signaling
737	0.73015328	NA	178	21	4h_DINCH_4_ctrlLPS	4h_ctrlLPS_pvalue	Germ Cell-Sertoli Cell Junction Signaling
738	0.499864522	0.816	101	18	4h_DINCH_4_ctrlLPS	4h_ctrlLPS_pvalue	Glioma Invasiveness Signaling
739	0.216616683	NA	172	21	4h_DINCH_4_ctrlLPS	4h_ctrlLPS_pvalue	Glucocorticoid Receptor Signaling
740	2.179739065	-2.449	102	13	4h_DINCH_4_ctrlLPS	4h_ctrlLPS_pvalue	Gluconeogenesis I
741	0.233372177	NA	118	21	4h_DINCH_4_ctrlLPS	4h_ctrlLPS_pvalue	Glutamate Receptor Signaling
742	0	NA	62	21	4h_DINCH_4_ctrlLPS	4h_ctrlLPS_pvalue	Glutamate Removal from Folates
743	0.554023504	NA	169	21	4h_DINCH_4_ctrlLPS	4h_ctrlLPS_pvalue	Glutamine Degradation I
744	0.382632229	NA	215	17	4h_DINCH_4_ctrlLPS	4h_ctrlLPS_pvalue	Glutaryl-CoA Degradation
745	0.326712661	NA	207	21	4h_DINCH_4_ctrlLPS	4h_ctrlLPS_pvalue	Glutathione-mediated Detoxification
746	0.415188453	NA	126	21	4h_DINCH_4_ctrlLPS	4h_ctrlLPS_pvalue	Glutathione Biosynthesis
747	0.341974365	NA	195	21	4h_DINCH_4_ctrlLPS	4h_ctrlLPS_pvalue	Glutathione Redox Reactions I
748	0	NA	27	21	4h_DINCH_4_ctrlLPS	4h_ctrlLPS_pvalue	Glutathione Redox Reactions II
749	0.306341497	NA	193	21	4h_DINCH_4_ctrlLPS	4h_ctrlLPS_pvalue	Glycine Cleavage Complex
750	0.464149885	NA	167	21	4h_DINCH_4_ctrlLPS	4h_ctrlLPS_pvalue	Glycine Degradation (Creatine Biosynthesis)
751	0.306341497	NA	148	21	4h_DINCH_4_ctrlLPS	4h_ctrlLPS_pvalue	Glycogen Biosynthesis II (from UDP-D-Glucose)
752	3.021027846	-1.89	56	13	4h_DINCH_4_ctrlLPS	4h_ctrlLPS_pvalue	Glycolysis I
753	0.382632229	-0.447	40	18	4h_DINCH_4_ctrlLPS	4h_ctrlLPS_pvalue	GM-CSF Signaling
754	1.307117198	NA	153	21	4h_DINCH_4_ctrlLPS	4h_ctrlLPS_pvalue	Granzyme A Signaling
755	0.382632229	NA	139	21	4h_DINCH_4_ctrlLPS	4h_ctrlLPS_pvalue	Granzyme B Signaling
756	0	NA	196	21	4h_DINCH_4_ctrlLPS	4h_ctrlLPS_pvalue	Heme Biosynthesis II
757	0.929080582	-0.775	85	19	4h_DINCH_4_ctrlLPS	4h_ctrlLPS_pvalue	HIF1? Signaling
758	0.178144447	NA	52	20	4h_DINCH_4_ctrlLPS	4h_ctrlLPS_pvalue	HIPPO signaling
759	0.547662554	1	107	11	4h_DINCH_4_ctrlLPS	4h_ctrlLPS_pvalue	Huntington's Disease Signaling
760	1.746714029	NA	159	21	4h_DINCH_4_ctrlLPS	4h_ctrlLPS_pvalue	Hypoxia Signaling in the Cardiovascular System
761	0.415188453	0.447	64	18	4h_DINCH_4_ctrlLPS	4h_ctrlLPS_pvalue	IGF-1 Signaling
762	0.235806035	NA	176	21	4h_DINCH_4_ctrlLPS	4h_ctrlLPS_pvalue	IL-10 Signaling
763	0.339118115	0.447	117	20	4h_DINCH_4_ctrlLPS	4h_ctrlLPS_pvalue	IL-15 Signaling
764	0.545384241	0.447	213	20	4h_DINCH_4_ctrlLPS	4h_ctrlLPS_pvalue	IL-17A Signaling in Airway Cells
765	0.415188453	1	49	20	4h_DINCH_4_ctrlLPS	4h_ctrlLPS_pvalue	IL-23 Signaling Pathway
766	0.189848524	1	72	20	4h_DINCH_4_ctrlLPS	4h_ctrlLPS_pvalue	IL-3 Signaling
767	1.223501373	-1.941	5	5	4h_DINCH_4_ctrlLPS	4h_ctrlLPS_pvalue	IL-8 Signaling
768	1.979265198	-1	96	7	4h_DINCH_4_ctrlLPS	4h_ctrlLPS_pvalue	ILK Signaling
769	0.578170278	-1.633	35	19	4h_DINCH_4_ctrlLPS	4h_ctrlLPS_pvalue	Induction of Apoptosis by HIV1
770	0.534376815	NA	134	21	4h_DINCH_4_ctrlLPS	4h_ctrlLPS_pvalue	Inflammasome pathway
771	0.322951805	0.378	89	12	4h_DINCH_4_ctrlLPS	4h_ctrlLPS_pvalue	Inhibition of ARE-Mediated mRNA Degradation Pathway
772	0.415188453	NA	30	21	4h_DINCH_4_ctrlLPS	4h_ctrlLPS_pvalue	iNOS Signaling
773	1.25805462	0.258	84	12	4h_DINCH_4_ctrlLPS	4h_ctrlLPS_pvalue	Insulin Secretion Signaling Pathway
774	1.165117885	-0.775	105	15	4h_DINCH_4_ctrlLPS	4h_ctrlLPS_pvalue	Integrin Signaling
775	0.178144447	NA	203	20	4h_DINCH_4_ctrlLPS	4h_ctrlLPS_pvalue	Interferon Signaling
776	0.306580726	NA	143	21	4h_DINCH_4_ctrlLPS	4h_ctrlLPS_pvalue	Iron homeostasis signaling pathway
777	0.382632229	NA	74	17	4h_DINCH_4_ctrlLPS	4h_ctrlLPS_pvalue	Isoleucine Degradation I
778	0.545384241	0.378	95	20	4h_DINCH_4_ctrlLPS	4h_ctrlLPS_pvalue	JAK/Stat Signaling
779	0.206324469	NA	202	21	4h_DINCH_4_ctrlLPS	4h_ctrlLPS_pvalue	Ketogenesis
780	0.246890719	NA	180	21	4h_DINCH_4_ctrlLPS	4h_ctrlLPS_pvalue	Ketolysis
781	0	NA	182	21	4h_DINCH_4_ctrlLPS	4h_ctrlLPS_pvalue	Lactose Degradation III
782	0.233372177	NA	163	21	4h_DINCH_4_ctrlLPS	4h_ctrlLPS_pvalue	Leucine Degradation I
783	1.508516169	-1.807	57	5	4h_DINCH_4_ctrlLPS	4h_ctrlLPS_pvalue	Leukocyte Extravasation Signaling
784	0.468033685	NA	41	21	4h_DINCH_4_ctrlLPS	4h_ctrlLPS_pvalue	Lipid Antigen Presentation by CD1
785	0.512683839	0.816	67	22	4h_DINCH_4_ctrlLPS	4h_ctrlLPS_pvalue	LXR/RXR Activation
786	0.464149885	NA	19	21	4h_DINCH_4_ctrlLPS	4h_ctrlLPS_pvalue	Mechanisms of Viral Exit from Host Cells
787	0.151849744	NA	129	21	4h_DINCH_4_ctrlLPS	4h_ctrlLPS_pvalue	Methionine Degradation I (to Homocysteine)
788	0	NA	162	21	4h_DINCH_4_ctrlLPS	4h_ctrlLPS_pvalue	Methylthiopropionate Biosynthesis
789	0.178144447	NA	111	17	4h_DINCH_4_ctrlLPS	4h_ctrlLPS_pvalue	Mevalonate Pathway I
790	3.252541036	NA	168	21	4h_DINCH_4_ctrlLPS	4h_ctrlLPS_pvalue	Mitochondrial Dysfunction
791	0	NA	25	21	4h_DINCH_4_ctrlLPS	4h_ctrlLPS_pvalue	Mitotic Roles of Polo-Like Kinase
792	1.980264951	1	50	18	4h_DINCH_4_ctrlLPS	4h_ctrlLPS_pvalue	mTOR Signaling
793	0.578170278	-0.277	97	17	4h_DINCH_4_ctrlLPS	4h_ctrlLPS_pvalue	Natural Killer Cell Signaling
794	0.464695823	-1.265	29	10	4h_DINCH_4_ctrlLPS	4h_ctrlLPS_pvalue	Necroptosis Signaling Pathway
795	0.357219381	NA	109	18	4h_DINCH_4_ctrlLPS	4h_ctrlLPS_pvalue	Neuregulin Signaling
796	0.173822782	NA	210	16	4h_DINCH_4_ctrlLPS	4h_ctrlLPS_pvalue	Neuroprotective Role of THOP1 in Alzheimer's Disease
797	1.585619352	-2.121	6	3	4h_DINCH_4_ctrlLPS	4h_ctrlLPS_pvalue	NRF2-mediated Oxidative Stress Response
798	0.357219381	NA	161	21	4h_DINCH_4_ctrlLPS	4h_ctrlLPS_pvalue	Nucleotide Excision Repair Pathway
799	3.061290312	-1.807	81	5	4h_DINCH_4_ctrlLPS	4h_ctrlLPS_pvalue	Oxidative Phosphorylation
800	0.47944769	0.707	80	20	4h_DINCH_4_ctrlLPS	4h_ctrlLPS_pvalue	P2Y Purigenic Receptor Signaling Pathway
801	0.415188453	-0.816	53	12	4h_DINCH_4_ctrlLPS	4h_ctrlLPS_pvalue	p70S6K Signaling
802	0.257259979	0.447	200	21	4h_DINCH_4_ctrlLPS	4h_ctrlLPS_pvalue	Pancreatic Adenocarcinoma Signaling
803	0.206324469	NA	123	21	4h_DINCH_4_ctrlLPS	4h_ctrlLPS_pvalue	Parkinson's Signaling
804	0.74171285	-1.89	66	13	4h_DINCH_4_ctrlLPS	4h_ctrlLPS_pvalue	Paxillin Signaling
805	0.267297706	1.342	88	20	4h_DINCH_4_ctrlLPS	4h_ctrlLPS_pvalue	PDGF Signaling
806	0.47944769	NA	219	17	4h_DINCH_4_ctrlLPS	4h_ctrlLPS_pvalue	Pentose Phosphate Pathway
807	0.74171285	NA	181	21	4h_DINCH_4_ctrlLPS	4h_ctrlLPS_pvalue	Pentose Phosphate Pathway (Non-oxidative Branch)
808	0	NA	189	21	4h_DINCH_4_ctrlLPS	4h_ctrlLPS_pvalue	Pentose Phosphate Pathway (Oxidative Branch)
809	0.415188453	0	149	21	4h_DINCH_4_ctrlLPS	4h_ctrlLPS_pvalue	PFKFB4 Signaling Pathway
810	2.287408501	NA	174	21	4h_DINCH_4_ctrlLPS	4h_ctrlLPS_pvalue	Phagosome Maturation
811	0.191387636	NA	132	21	4h_DINCH_4_ctrlLPS	4h_ctrlLPS_pvalue	Phenylalanine Degradation IV (Mammalian, via Side Chain)
812	0.415188453	NA	146	21	4h_DINCH_4_ctrlLPS	4h_ctrlLPS_pvalue	Phenylethylamine Degradation I
813	0.382632229	-1.667	13	7	4h_DINCH_4_ctrlLPS	4h_ctrlLPS_pvalue	PI3K/AKT Signaling
814	0.12518112	NA	8	21	4h_DINCH_4_ctrlLPS	4h_ctrlLPS_pvalue	Polyamine Regulation in Colon Cancer
815	0.322590168	1.633	48	11	4h_DINCH_4_ctrlLPS	4h_ctrlLPS_pvalue	PPAR Signaling
816	0.459143086	1.265	54	20	4h_DINCH_4_ctrlLPS	4h_ctrlLPS_pvalue	PPAR?/RXR? Activation
817	1.1781214	0	61	20	4h_DINCH_4_ctrlLPS	4h_ctrlLPS_pvalue	Production of Nitric Oxide and Reactive Oxygen Species in Macrophages
818	0.382632229	NA	185	21	4h_DINCH_4_ctrlLPS	4h_ctrlLPS_pvalue	Prostate Cancer Signaling
819	0.545384241	-0.535	44	19	4h_DINCH_4_ctrlLPS	4h_ctrlLPS_pvalue	Protein Kinase A Signaling
820	3.017812665	NA	137	21	4h_DINCH_4_ctrlLPS	4h_ctrlLPS_pvalue	Protein Ubiquitination Pathway
821	0	NA	120	21	4h_DINCH_4_ctrlLPS	4h_ctrlLPS_pvalue	Purine Nucleotides De Novo Biosynthesis II
822	0.999938637	NA	142	21	4h_DINCH_4_ctrlLPS	4h_ctrlLPS_pvalue	Pyruvate Fermentation to Lactate
823	0.929080582	-1.667	21	5	4h_DINCH_4_ctrlLPS	4h_ctrlLPS_pvalue	Rac Signaling
824	0.382632229	NA	156	21	4h_DINCH_4_ctrlLPS	4h_ctrlLPS_pvalue	RAN Signaling
825	0.319135993	NA	122	21	4h_DINCH_4_ctrlLPS	4h_ctrlLPS_pvalue	RAR Activation
826	0.499864522	-0.333	82	19	4h_DINCH_4_ctrlLPS	4h_ctrlLPS_pvalue	Reelin Signaling in Neurons
827	0.936744685	-1.134	86	5	4h_DINCH_4_ctrlLPS	4h_ctrlLPS_pvalue	Regulation of Actin-based Motility by Rho
828	0.416643926	NA	165	21	4h_DINCH_4_ctrlLPS	4h_ctrlLPS_pvalue	Regulation of Cellular Mechanics by Calpain Protease
829	4.21962919	NA	76	19	4h_DINCH_4_ctrlLPS	4h_ctrlLPS_pvalue	Regulation of eIF4 and p70S6K Signaling
830	0.132955578	0.378	103	20	4h_DINCH_4_ctrlLPS	4h_ctrlLPS_pvalue	Regulation Of The Epithelial Mesenchymal Transition By Growth Factors Pathway
831	0.727551434	0	106	18	4h_DINCH_4_ctrlLPS	4h_ctrlLPS_pvalue	Relaxin Signaling
832	0.415188453	NA	87	15	4h_DINCH_4_ctrlLPS	4h_ctrlLPS_pvalue	Remodeling of Epithelial Adherens Junctions
833	0.339118115	NA	211	18	4h_DINCH_4_ctrlLPS	4h_ctrlLPS_pvalue	Renal Cell Carcinoma Signaling
834	0.262895972	-1.633	3	3	4h_DINCH_4_ctrlLPS	4h_ctrlLPS_pvalue	RhoA Signaling
835	1.223501373	1.897	65	4	4h_DINCH_4_ctrlLPS	4h_ctrlLPS_pvalue	RhoGDI Signaling
836	0.936744685	NA	187	21	4h_DINCH_4_ctrlLPS	4h_ctrlLPS_pvalue	Role of IL-17A in Psoriasis
837	0.291700903	NA	173	21	4h_DINCH_4_ctrlLPS	4h_ctrlLPS_pvalue	Role of IL-17F in Allergic Inflammatory Airway Diseases
838	1.363391465	NA	121	21	4h_DINCH_4_ctrlLPS	4h_ctrlLPS_pvalue	Role of JAK1, JAK2 and TYK2 in Interferon Signaling
839	0.191387636	0.378	73	18	4h_DINCH_4_ctrlLPS	4h_ctrlLPS_pvalue	Role of NFAT in Cardiac Hypertrophy
840	1.13836503	-0.816	216	19	4h_DINCH_4_ctrlLPS	4h_ctrlLPS_pvalue	Role of PI3K/AKT Signaling in the Pathogenesis of Influenza
841	1.133832162	1.265	36	4	4h_DINCH_4_ctrlLPS	4h_ctrlLPS_pvalue	Role of PKR in Interferon Induction and Antiviral Response
842	0.245917666	NA	164	21	4h_DINCH_4_ctrlLPS	4h_ctrlLPS_pvalue	Role of Tissue Factor in Cancer
843	0.464149885	NA	144	21	4h_DINCH_4_ctrlLPS	4h_ctrlLPS_pvalue	S-adenosyl-L-methionine Biosynthesis
844	0.20282359	-0.447	59	21	4h_DINCH_4_ctrlLPS	4h_ctrlLPS_pvalue	SAPK/JNK Signaling
845	0.306341497	NA	24	21	4h_DINCH_4_ctrlLPS	4h_ctrlLPS_pvalue	Selenocysteine Biosynthesis II (Archaea and Eukaryotes)
846	0.505183458	NA	20	21	4h_DINCH_4_ctrlLPS	4h_ctrlLPS_pvalue	Semaphorin Signaling in Neurons
847	0.382632229	NA	133	21	4h_DINCH_4_ctrlLPS	4h_ctrlLPS_pvalue	Serine Biosynthesis
848	2.179739065	-1	42	5	4h_DINCH_4_ctrlLPS	4h_ctrlLPS_pvalue	Signaling by Rho Family GTPases
849	5.484417415	-1	113	10	4h_DINCH_4_ctrlLPS	4h_ctrlLPS_pvalue	Sirtuin Signaling Pathway
850	0	NA	145	21	4h_DINCH_4_ctrlLPS	4h_ctrlLPS_pvalue	Sorbitol Degradation I
851	0	NA	206	18	4h_DINCH_4_ctrlLPS	4h_ctrlLPS_pvalue	SPINK1 Pancreatic Cancer Pathway
852	0.415188453	-1	51	15	4h_DINCH_4_ctrlLPS	4h_ctrlLPS_pvalue	Spliceosomal Cycle
853	0.554023504	NA	37	21	4h_DINCH_4_ctrlLPS	4h_ctrlLPS_pvalue	Sucrose Degradation V (Mammalian)
854	0	NA	170	21	4h_DINCH_4_ctrlLPS	4h_ctrlLPS_pvalue	Sulfate Activation for Sulfonation
855	1.111867676	0	77	10	4h_DINCH_4_ctrlLPS	4h_ctrlLPS_pvalue	Sumoylation Pathway
856	2.179739065	-2	218	19	4h_DINCH_4_ctrlLPS	4h_ctrlLPS_pvalue	Superoxide Radicals Degradation
857	0.415188453	NA	100	17	4h_DINCH_4_ctrlLPS	4h_ctrlLPS_pvalue	Superpathway of Cholesterol Biosynthesis
858	0.151849744	NA	220	17	4h_DINCH_4_ctrlLPS	4h_ctrlLPS_pvalue	Superpathway of Geranylgeranyldiphosphate Biosynthesis I (via Mevalonate)
859	0.206324469	NA	197	21	4h_DINCH_4_ctrlLPS	4h_ctrlLPS_pvalue	Superpathway of Methionine Degradation
860	0.74171285	NA	34	21	4h_DINCH_4_ctrlLPS	4h_ctrlLPS_pvalue	Superpathway of Serine and Glycine Biosynthesis I
861	0.245917666	0.577	78	18	4h_DINCH_4_ctrlLPS	4h_ctrlLPS_pvalue	Synaptogenesis Signaling Pathway
862	0.999938637	-1	79	15	4h_DINCH_4_ctrlLPS	4h_ctrlLPS_pvalue	TCA Cycle II (Eukaryotic)
863	1.509716094	0.302	47	11	4h_DINCH_4_ctrlLPS	4h_ctrlLPS_pvalue	Tec Kinase Signaling
864	0.299370436	-1	91	7	4h_DINCH_4_ctrlLPS	4h_ctrlLPS_pvalue	Telomerase Signaling
865	1.307117198	NA	184	21	4h_DINCH_4_ctrlLPS	4h_ctrlLPS_pvalue	Telomere Extension by Telomerase
866	0.512683839	1.633	15	4	4h_DINCH_4_ctrlLPS	4h_ctrlLPS_pvalue	Th17 Activation Pathway
867	0.568165307	-0.632	119	19	4h_DINCH_4_ctrlLPS	4h_ctrlLPS_pvalue	Thrombin Signaling
868	0.929406286	NA	124	21	4h_DINCH_4_ctrlLPS	4h_ctrlLPS_pvalue	Tight Junction Signaling
869	0	NA	135	21	4h_DINCH_4_ctrlLPS	4h_ctrlLPS_pvalue	Triacylglycerol Degradation
870	2.199256732	0.707	55	21	4h_DINCH_4_ctrlLPS	4h_ctrlLPS_pvalue	tRNA Charging
871	0.468033685	NA	212	17	4h_DINCH_4_ctrlLPS	4h_ctrlLPS_pvalue	Tryptophan Degradation III (Eukaryotic)
872	0.264063226	NA	136	21	4h_DINCH_4_ctrlLPS	4h_ctrlLPS_pvalue	Tumoricidal Function of Hepatic Natural Killer Cells
873	0	NA	141	21	4h_DINCH_4_ctrlLPS	4h_ctrlLPS_pvalue	UDP-D-xylose and UDP-D-glucuronate Biosynthesis
874	0	NA	157	21	4h_DINCH_4_ctrlLPS	4h_ctrlLPS_pvalue	UDP-N-acetyl-D-galactosamine Biosynthesis I
875	1.431199043	-2.646	14	3	4h_DINCH_4_ctrlLPS	4h_ctrlLPS_pvalue	Unfolded protein response
876	0.341974365	NA	209	17	4h_DINCH_4_ctrlLPS	4h_ctrlLPS_pvalue	Valine Degradation I
877	1.151934831	-0.816	63	19	4h_DINCH_4_ctrlLPS	4h_ctrlLPS_pvalue	VEGF Signaling
878	1.693504218	NA	152	21	4h_DINCH_4_ctrlLPS	4h_ctrlLPS_pvalue	Virus Entry via Endocytic Pathways
879	1.049589311	NA	155	21	4h_DINCH_4_ctrlLPS	4h_ctrlLPS_pvalue	Vitamin-C Transport
880	1.362448506	0.333	70	11	4h_DINCH_4_ctrlLPS	4h_ctrlLPS_pvalue	Xenobiotic Metabolism AHR Signaling Pathway
881	0.382632229	-0.333	115	17	4h_DINCH_4_ctrlLPS	4h_ctrlLPS_pvalue	Xenobiotic Metabolism CAR Signaling Pathway
882	0.534376815	0.905	39	11	4h_DINCH_4_ctrlLPS	4h_ctrlLPS_pvalue	Xenobiotic Metabolism PXR Signaling Pathway
883	0.464695823	NA	33	21	4h_DINCH_4_ctrlLPS	4h_ctrlLPS_pvalue	Xenobiotic Metabolism Signaling
884	0.74171285	NA	186	21	4h_DINCH_4_ctrlLPS	4h_ctrlLPS_pvalue	Zymosterol Biosynthesis
885	0.76897741	-2	221	18	4h_MINCH_1_ctrlLPS	4h_ctrlLPS_pvalue	?-Adrenergic Signaling
886	0.312318742	NA	138	21	4h_MINCH_1_ctrlLPS	4h_ctrlLPS_pvalue	?-glutamyl Cycle
887	1.161038503	-2.828	11	8	4h_MINCH_1_ctrlLPS	4h_ctrlLPS_pvalue	14-3-3-mediated Signaling
888	0.477025036	NA	194	21	4h_MINCH_1_ctrlLPS	4h_ctrlLPS_pvalue	2-ketoglutarate Dehydrogenase Complex
889	0.398008847	NA	130	21	4h_MINCH_1_ctrlLPS	4h_ctrlLPS_pvalue	Acetyl-CoA Biosynthesis I (Pyruvate Dehydrogenase Complex)
890	0.800441625	NA	160	21	4h_MINCH_1_ctrlLPS	4h_ctrlLPS_pvalue	Acetyl-CoA Biosynthesis III (from Citrate)
891	5.320483074	-1.877	2	3	4h_MINCH_1_ctrlLPS	4h_ctrlLPS_pvalue	Actin Cytoskeleton Signaling
892	2.03805846	-2.333	114	15	4h_MINCH_1_ctrlLPS	4h_ctrlLPS_pvalue	Actin Nucleation by ARP-WASP Complex
893	0	NA	154	21	4h_MINCH_1_ctrlLPS	4h_ctrlLPS_pvalue	Acyl Carrier Protein Metabolism
894	0.800441625	NA	150	21	4h_MINCH_1_ctrlLPS	4h_ctrlLPS_pvalue	Adenine and Adenosine Salvage VI
895	0.810908915	NA	28	21	4h_MINCH_1_ctrlLPS	4h_ctrlLPS_pvalue	Agranulocyte Adhesion and Diapedesis
896	1.61810065	NA	147	21	4h_MINCH_1_ctrlLPS	4h_ctrlLPS_pvalue	Aldosterone Signaling in Epithelial Cells
897	0.312318742	0	60	16	4h_MINCH_1_ctrlLPS	4h_ctrlLPS_pvalue	AMPK Signaling
898	0	NA	171	21	4h_MINCH_1_ctrlLPS	4h_ctrlLPS_pvalue	Amyloid Processing
899	0.800441625	-0.816	199	18	4h_MINCH_1_ctrlLPS	4h_ctrlLPS_pvalue	Angiopoietin Signaling
900	1.107322485	NA	32	21	4h_MINCH_1_ctrlLPS	4h_ctrlLPS_pvalue	Antigen Presentation Pathway
901	1.908988282	-1.89	75	19	4h_MINCH_1_ctrlLPS	4h_ctrlLPS_pvalue	Antiproliferative Role of Somatostatin Receptor 2
902	1.107322485	2	116	22	4h_MINCH_1_ctrlLPS	4h_ctrlLPS_pvalue	Antiproliferative Role of TOB in T Cell Signaling
903	0.190124456	NA	71	14	4h_MINCH_1_ctrlLPS	4h_ctrlLPS_pvalue	Apelin Adipocyte Signaling Pathway
904	0.400444883	-2.236	69	12	4h_MINCH_1_ctrlLPS	4h_ctrlLPS_pvalue	Apelin Cardiomyocyte Signaling Pathway
905	0.698180549	0.378	214	21	4h_MINCH_1_ctrlLPS	4h_ctrlLPS_pvalue	Apoptosis Signaling
906	1.049721087	NA	131	21	4h_MINCH_1_ctrlLPS	4h_ctrlLPS_pvalue	Arginine Biosynthesis IV
907	0.760520917	0.447	68	11	4h_MINCH_1_ctrlLPS	4h_ctrlLPS_pvalue	Aryl Hydrocarbon Receptor Signaling
908	0.979569062	NA	140	21	4h_MINCH_1_ctrlLPS	4h_ctrlLPS_pvalue	Aspartate Degradation II
909	1.049721087	NA	26	21	4h_MINCH_1_ctrlLPS	4h_ctrlLPS_pvalue	Axonal Guidance Signaling
910	1.514342234	-2.449	9	6	4h_MINCH_1_ctrlLPS	4h_ctrlLPS_pvalue	BAG2 Signaling Pathway
911	0.268222213	NA	190	21	4h_MINCH_1_ctrlLPS	4h_ctrlLPS_pvalue	BER pathway
912	0.477025036	NA	151	21	4h_MINCH_1_ctrlLPS	4h_ctrlLPS_pvalue	Branched-chain ?-keto acid Dehydrogenase Complex
913	0.436006195	NA	201	21	4h_MINCH_1_ctrlLPS	4h_ctrlLPS_pvalue	Calcium-induced T Lymphocyte Apoptosis
914	1.024514684	-2.236	104	18	4h_MINCH_1_ctrlLPS	4h_ctrlLPS_pvalue	Calcium Signaling
915	0.583383676	-1	208	18	4h_MINCH_1_ctrlLPS	4h_ctrlLPS_pvalue	Cardiac ?-adrenergic Signaling
916	0.599708754	-0.905	58	21	4h_MINCH_1_ctrlLPS	4h_ctrlLPS_pvalue	Cardiac Hypertrophy Signaling
917	2.419619764	NA	188	21	4h_MINCH_1_ctrlLPS	4h_ctrlLPS_pvalue	Caveolar-mediated Endocytosis Signaling
918	0.718182193	NA	18	21	4h_MINCH_1_ctrlLPS	4h_ctrlLPS_pvalue	CCR3 Signaling in Eosinophils
919	1.500500014	-1	112	19	4h_MINCH_1_ctrlLPS	4h_ctrlLPS_pvalue	CD28 Signaling in T Helper Cells
920	0	NA	17	21	4h_MINCH_1_ctrlLPS	4h_ctrlLPS_pvalue	CD40 Signaling
921	1.404793839	-2.53	7	6	4h_MINCH_1_ctrlLPS	4h_ctrlLPS_pvalue	Cdc42 Signaling
922	1.050827831	0	204	20	4h_MINCH_1_ctrlLPS	4h_ctrlLPS_pvalue	Cell Cycle Control of Chromosomal Replication
923	1.180650595	0	31	21	4h_MINCH_1_ctrlLPS	4h_ctrlLPS_pvalue	Cell Cycle: G2/M DNA Damage Checkpoint Regulation
924	0.829255754	-0.378	90	19	4h_MINCH_1_ctrlLPS	4h_ctrlLPS_pvalue	Ceramide Signaling
925	1.010203847	-1.89	92	19	4h_MINCH_1_ctrlLPS	4h_ctrlLPS_pvalue	Chemokine Signaling
926	1.816491741	NA	125	21	4h_MINCH_1_ctrlLPS	4h_ctrlLPS_pvalue	Chronic Myeloid Leukemia Signaling
927	0.433624139	NA	16	21	4h_MINCH_1_ctrlLPS	4h_ctrlLPS_pvalue	Citrulline Biosynthesis
928	2.952931515	NA	175	21	4h_MINCH_1_ctrlLPS	4h_ctrlLPS_pvalue	Clathrin-mediated Endocytosis Signaling
929	0.376851429	-1.134	94	16	4h_MINCH_1_ctrlLPS	4h_ctrlLPS_pvalue	Colorectal Cancer Metastasis Signaling
930	5.425227346	4.025	1	1	4h_MINCH_1_ctrlLPS	4h_ctrlLPS_pvalue	Coronavirus Pathogenesis Pathway
931	0.270148482	NA	158	21	4h_MINCH_1_ctrlLPS	4h_ctrlLPS_pvalue	Crosstalk between Dendritic Cells and Natural Killer Cells
932	0.846882902	NA	127	21	4h_MINCH_1_ctrlLPS	4h_ctrlLPS_pvalue	CTLA4 Signaling in Cytotoxic T Lymphocytes
933	0.583383676	-1.414	43	19	4h_MINCH_1_ctrlLPS	4h_ctrlLPS_pvalue	CXCR4 Signaling
934	0.453467032	NA	22	21	4h_MINCH_1_ctrlLPS	4h_ctrlLPS_pvalue	Cysteine Biosynthesis III (mammalia)
935	0.557148643	NA	23	21	4h_MINCH_1_ctrlLPS	4h_ctrlLPS_pvalue	Cytotoxic T Lymphocyte-mediated Apoptosis of Target Cells
936	0	NA	183	21	4h_MINCH_1_ctrlLPS	4h_ctrlLPS_pvalue	D-mannose Degradation
937	0.24987507	-1	110	21	4h_MINCH_1_ctrlLPS	4h_ctrlLPS_pvalue	Death Receptor Signaling
938	1.043556117	NA	191	21	4h_MINCH_1_ctrlLPS	4h_ctrlLPS_pvalue	DNA Double-Strand Break Repair by Non-Homologous End Joining
939	0	NA	177	21	4h_MINCH_1_ctrlLPS	4h_ctrlLPS_pvalue	Dopamine Degradation
940	20.33329541	-4.315	4	2	4h_MINCH_1_ctrlLPS	4h_ctrlLPS_pvalue	EIF2 Signaling
941	0.436452478	NA	198	21	4h_MINCH_1_ctrlLPS	4h_ctrlLPS_pvalue	Endoplasmic Reticulum Stress Pathway
942	0.800441625	NA	217	17	4h_MINCH_1_ctrlLPS	4h_ctrlLPS_pvalue	Ephrin B Signaling
943	2.503725843	-2.183	46	5	4h_MINCH_1_ctrlLPS	4h_ctrlLPS_pvalue	Ephrin Receptor Signaling
944	2.265794892	NA	179	21	4h_MINCH_1_ctrlLPS	4h_ctrlLPS_pvalue	Epithelial Adherens Junction Signaling
945	0.838866605	-1	99	19	4h_MINCH_1_ctrlLPS	4h_ctrlLPS_pvalue	ERK/MAPK Signaling
946	0.77734621	-2.449	83	15	4h_MINCH_1_ctrlLPS	4h_ctrlLPS_pvalue	ERK5 Signaling
947	0	NA	192	21	4h_MINCH_1_ctrlLPS	4h_ctrlLPS_pvalue	Estrogen Biosynthesis
948	1.541883551	-1.606	93	19	4h_MINCH_1_ctrlLPS	4h_ctrlLPS_pvalue	Estrogen Receptor Signaling
949	0.596752656	1	98	20	4h_MINCH_1_ctrlLPS	4h_ctrlLPS_pvalue	FAT10 Cancer Signaling Pathway
950	0.200970991	NA	205	16	4h_MINCH_1_ctrlLPS	4h_ctrlLPS_pvalue	FAT10 Signaling Pathway
951	1.010203847	-1	38	19	4h_MINCH_1_ctrlLPS	4h_ctrlLPS_pvalue	Fatty Acid ?-oxidation I
952	1.624803692	-2.53	12	9	4h_MINCH_1_ctrlLPS	4h_ctrlLPS_pvalue	Fc? Receptor-mediated Phagocytosis in Macrophages and Monocytes
953	2.3102601	-2.309	108	7	4h_MINCH_1_ctrlLPS	4h_ctrlLPS_pvalue	fMLP Signaling in Neutrophils
954	1.049721087	NA	166	21	4h_MINCH_1_ctrlLPS	4h_ctrlLPS_pvalue	Folate Polyglutamylation
955	0.77734621	NA	10	21	4h_MINCH_1_ctrlLPS	4h_ctrlLPS_pvalue	Folate Transformations I
956	0.644655785	NA	128	21	4h_MINCH_1_ctrlLPS	4h_ctrlLPS_pvalue	G Protein Signaling Mediated by Tubby
957	0.2348494	-0.447	45	20	4h_MINCH_1_ctrlLPS	4h_ctrlLPS_pvalue	G?q Signaling
958	0.917710853	NA	178	21	4h_MINCH_1_ctrlLPS	4h_ctrlLPS_pvalue	Germ Cell-Sertoli Cell Junction Signaling
959	0.375529784	-1	101	18	4h_MINCH_1_ctrlLPS	4h_ctrlLPS_pvalue	Glioma Invasiveness Signaling
960	0.644655785	NA	172	21	4h_MINCH_1_ctrlLPS	4h_ctrlLPS_pvalue	Glucocorticoid Receptor Signaling
961	0.786585514	NA	102	13	4h_MINCH_1_ctrlLPS	4h_ctrlLPS_pvalue	Gluconeogenesis I
962	0.175161651	NA	118	21	4h_MINCH_1_ctrlLPS	4h_ctrlLPS_pvalue	Glutamate Receptor Signaling
963	0.800441625	NA	62	21	4h_MINCH_1_ctrlLPS	4h_ctrlLPS_pvalue	Glutamate Removal from Folates
964	0	NA	169	21	4h_MINCH_1_ctrlLPS	4h_ctrlLPS_pvalue	Glutamine Degradation I
965	0.210330595	NA	215	17	4h_MINCH_1_ctrlLPS	4h_ctrlLPS_pvalue	Glutaryl-CoA Degradation
966	0.436452478	NA	207	21	4h_MINCH_1_ctrlLPS	4h_ctrlLPS_pvalue	Glutathione-mediated Detoxification
967	0	NA	126	21	4h_MINCH_1_ctrlLPS	4h_ctrlLPS_pvalue	Glutathione Biosynthesis
968	0.838866605	NA	195	21	4h_MINCH_1_ctrlLPS	4h_ctrlLPS_pvalue	Glutathione Redox Reactions I
969	1.180650595	NA	27	21	4h_MINCH_1_ctrlLPS	4h_ctrlLPS_pvalue	Glutathione Redox Reactions II
970	0.979569062	NA	193	21	4h_MINCH_1_ctrlLPS	4h_ctrlLPS_pvalue	Glycine Cleavage Complex
971	0.644655785	NA	167	21	4h_MINCH_1_ctrlLPS	4h_ctrlLPS_pvalue	Glycine Degradation (Creatine Biosynthesis)
972	0	NA	148	21	4h_MINCH_1_ctrlLPS	4h_ctrlLPS_pvalue	Glycogen Biosynthesis II (from UDP-D-Glucose)
973	0.426767853	NA	56	13	4h_MINCH_1_ctrlLPS	4h_ctrlLPS_pvalue	Glycolysis I
974	0.791908807	-2.449	40	18	4h_MINCH_1_ctrlLPS	4h_ctrlLPS_pvalue	GM-CSF Signaling
975	1.010203847	NA	153	21	4h_MINCH_1_ctrlLPS	4h_ctrlLPS_pvalue	Granzyme A Signaling
976	0.97719521	NA	139	21	4h_MINCH_1_ctrlLPS	4h_ctrlLPS_pvalue	Granzyme B Signaling
977	0.829255754	NA	196	21	4h_MINCH_1_ctrlLPS	4h_ctrlLPS_pvalue	Heme Biosynthesis II
978	2.03805846	-1.213	85	19	4h_MINCH_1_ctrlLPS	4h_ctrlLPS_pvalue	HIF1? Signaling
979	0.889391604	0.447	52	20	4h_MINCH_1_ctrlLPS	4h_ctrlLPS_pvalue	HIPPO signaling
980	1.473107186	0	107	11	4h_MINCH_1_ctrlLPS	4h_ctrlLPS_pvalue	Huntington's Disease Signaling
981	1.027493274	NA	159	21	4h_MINCH_1_ctrlLPS	4h_ctrlLPS_pvalue	Hypoxia Signaling in the Cardiovascular System
982	0.644655785	-2	64	18	4h_MINCH_1_ctrlLPS	4h_ctrlLPS_pvalue	IGF-1 Signaling
983	0	NA	176	21	4h_MINCH_1_ctrlLPS	4h_ctrlLPS_pvalue	IL-10 Signaling
984	0.7137474	-0.816	117	20	4h_MINCH_1_ctrlLPS	4h_ctrlLPS_pvalue	IL-15 Signaling
985	0	NA	213	20	4h_MINCH_1_ctrlLPS	4h_ctrlLPS_pvalue	IL-17A Signaling in Airway Cells
986	0	NA	49	20	4h_MINCH_1_ctrlLPS	4h_ctrlLPS_pvalue	IL-23 Signaling Pathway
987	0.917710853	-0.378	72	20	4h_MINCH_1_ctrlLPS	4h_ctrlLPS_pvalue	IL-3 Signaling
988	1.010203847	-2.714	5	5	4h_MINCH_1_ctrlLPS	4h_ctrlLPS_pvalue	IL-8 Signaling
989	1.265283928	-2.111	96	7	4h_MINCH_1_ctrlLPS	4h_ctrlLPS_pvalue	ILK Signaling
990	0.644655785	-1.342	35	19	4h_MINCH_1_ctrlLPS	4h_ctrlLPS_pvalue	Induction of Apoptosis by HIV1
991	0.436452478	NA	134	21	4h_MINCH_1_ctrlLPS	4h_ctrlLPS_pvalue	Inflammasome pathway
992	0.350676479	-2.449	89	12	4h_MINCH_1_ctrlLPS	4h_ctrlLPS_pvalue	Inhibition of ARE-Mediated mRNA Degradation Pathway
993	0.19644001	NA	30	21	4h_MINCH_1_ctrlLPS	4h_ctrlLPS_pvalue	iNOS Signaling
994	1.616481062	-2.5	84	12	4h_MINCH_1_ctrlLPS	4h_ctrlLPS_pvalue	Insulin Secretion Signaling Pathway
995	2.402995254	-1.698	105	15	4h_MINCH_1_ctrlLPS	4h_ctrlLPS_pvalue	Integrin Signaling
996	0.265500556	NA	203	20	4h_MINCH_1_ctrlLPS	4h_ctrlLPS_pvalue	Interferon Signaling
997	0.644655785	NA	143	21	4h_MINCH_1_ctrlLPS	4h_ctrlLPS_pvalue	Iron homeostasis signaling pathway
998	0.529429862	NA	74	17	4h_MINCH_1_ctrlLPS	4h_ctrlLPS_pvalue	Isoleucine Degradation I
999	1.180650595	-0.707	95	20	4h_MINCH_1_ctrlLPS	4h_ctrlLPS_pvalue	JAK/Stat Signaling
1000	0.285975902	NA	202	21	4h_MINCH_1_ctrlLPS	4h_ctrlLPS_pvalue	Ketogenesis
1001	0.331929033	NA	180	21	4h_MINCH_1_ctrlLPS	4h_ctrlLPS_pvalue	Ketolysis
1002	0.477025036	NA	182	21	4h_MINCH_1_ctrlLPS	4h_ctrlLPS_pvalue	Lactose Degradation III
1003	0.312318742	NA	163	21	4h_MINCH_1_ctrlLPS	4h_ctrlLPS_pvalue	Leucine Degradation I
1004	2.503725843	-1.414	57	5	4h_MINCH_1_ctrlLPS	4h_ctrlLPS_pvalue	Leukocyte Extravasation Signaling
1005	1.137421647	NA	41	21	4h_MINCH_1_ctrlLPS	4h_ctrlLPS_pvalue	Lipid Antigen Presentation by CD1
1006	0.312318742	1	67	22	4h_MINCH_1_ctrlLPS	4h_ctrlLPS_pvalue	LXR/RXR Activation
1007	0.426767853	NA	19	21	4h_MINCH_1_ctrlLPS	4h_ctrlLPS_pvalue	Mechanisms of Viral Exit from Host Cells
1008	0.492691608	NA	129	21	4h_MINCH_1_ctrlLPS	4h_ctrlLPS_pvalue	Methionine Degradation I (to Homocysteine)
1009	0	NA	162	21	4h_MINCH_1_ctrlLPS	4h_ctrlLPS_pvalue	Methylthiopropionate Biosynthesis
1010	0.250567565	NA	111	17	4h_MINCH_1_ctrlLPS	4h_ctrlLPS_pvalue	Mevalonate Pathway I
1011	2.698741986	NA	168	21	4h_MINCH_1_ctrlLPS	4h_ctrlLPS_pvalue	Mitochondrial Dysfunction
1012	0.939723603	NA	25	21	4h_MINCH_1_ctrlLPS	4h_ctrlLPS_pvalue	Mitotic Roles of Polo-Like Kinase
1013	3.458065888	-2.449	50	18	4h_MINCH_1_ctrlLPS	4h_ctrlLPS_pvalue	mTOR Signaling
1014	1.027493274	-0.832	97	17	4h_MINCH_1_ctrlLPS	4h_ctrlLPS_pvalue	Natural Killer Cell Signaling
1015	0.331929033	-0.378	29	10	4h_MINCH_1_ctrlLPS	4h_ctrlLPS_pvalue	Necroptosis Signaling Pathway
1016	2.109794517	-2.449	109	18	4h_MINCH_1_ctrlLPS	4h_ctrlLPS_pvalue	Neuregulin Signaling
1017	0.268222213	NA	210	16	4h_MINCH_1_ctrlLPS	4h_ctrlLPS_pvalue	Neuroprotective Role of THOP1 in Alzheimer's Disease
1018	1.61810065	-2.53	6	3	4h_MINCH_1_ctrlLPS	4h_ctrlLPS_pvalue	NRF2-mediated Oxidative Stress Response
1019	0	NA	161	21	4h_MINCH_1_ctrlLPS	4h_ctrlLPS_pvalue	Nucleotide Excision Repair Pathway
1020	2.3102601	-1.155	81	5	4h_MINCH_1_ctrlLPS	4h_ctrlLPS_pvalue	Oxidative Phosphorylation
1021	0.829255754	-0.707	80	20	4h_MINCH_1_ctrlLPS	4h_ctrlLPS_pvalue	P2Y Purigenic Receptor Signaling Pathway
1022	2.155508642	-3.162	53	12	4h_MINCH_1_ctrlLPS	4h_ctrlLPS_pvalue	p70S6K Signaling
1023	0.414121486	NA	200	21	4h_MINCH_1_ctrlLPS	4h_ctrlLPS_pvalue	Pancreatic Adenocarcinoma Signaling
1024	0.285975902	NA	123	21	4h_MINCH_1_ctrlLPS	4h_ctrlLPS_pvalue	Parkinson's Signaling
1025	1.107322485	-1.134	66	13	4h_MINCH_1_ctrlLPS	4h_ctrlLPS_pvalue	Paxillin Signaling
1026	0.420017897	-0.447	88	20	4h_MINCH_1_ctrlLPS	4h_ctrlLPS_pvalue	PDGF Signaling
1027	1.298952717	NA	219	17	4h_MINCH_1_ctrlLPS	4h_ctrlLPS_pvalue	Pentose Phosphate Pathway
1028	0.398008847	NA	181	21	4h_MINCH_1_ctrlLPS	4h_ctrlLPS_pvalue	Pentose Phosphate Pathway (Non-oxidative Branch)
1029	1.180650595	NA	189	21	4h_MINCH_1_ctrlLPS	4h_ctrlLPS_pvalue	Pentose Phosphate Pathway (Oxidative Branch)
1030	0.375529784	NA	149	21	4h_MINCH_1_ctrlLPS	4h_ctrlLPS_pvalue	PFKFB4 Signaling Pathway
1031	2.251088621	NA	174	21	4h_MINCH_1_ctrlLPS	4h_ctrlLPS_pvalue	Phagosome Maturation
1032	0	NA	132	21	4h_MINCH_1_ctrlLPS	4h_ctrlLPS_pvalue	Phenylalanine Degradation IV (Mammalian, via Side Chain)
1033	0	NA	146	21	4h_MINCH_1_ctrlLPS	4h_ctrlLPS_pvalue	Phenylethylamine Degradation I
1034	1.180650595	-2.496	13	7	4h_MINCH_1_ctrlLPS	4h_ctrlLPS_pvalue	PI3K/AKT Signaling
1035	0	NA	8	21	4h_MINCH_1_ctrlLPS	4h_ctrlLPS_pvalue	Polyamine Regulation in Colon Cancer
1036	0.917710853	1.414	48	11	4h_MINCH_1_ctrlLPS	4h_ctrlLPS_pvalue	PPAR Signaling
1037	0.979569062	0.302	54	20	4h_MINCH_1_ctrlLPS	4h_ctrlLPS_pvalue	PPAR?/RXR? Activation
1038	0.436452478	-0.816	61	20	4h_MINCH_1_ctrlLPS	4h_ctrlLPS_pvalue	Production of Nitric Oxide and Reactive Oxygen Species in Macrophages
1039	1.027493274	NA	185	21	4h_MINCH_1_ctrlLPS	4h_ctrlLPS_pvalue	Prostate Cancer Signaling
1040	1.215029815	-0.728	44	19	4h_MINCH_1_ctrlLPS	4h_ctrlLPS_pvalue	Protein Kinase A Signaling
1041	3.458065888	NA	137	21	4h_MINCH_1_ctrlLPS	4h_ctrlLPS_pvalue	Protein Ubiquitination Pathway
1042	0.285975902	NA	120	21	4h_MINCH_1_ctrlLPS	4h_ctrlLPS_pvalue	Purine Nucleotides De Novo Biosynthesis II
1043	1.180650595	NA	142	21	4h_MINCH_1_ctrlLPS	4h_ctrlLPS_pvalue	Pyruvate Fermentation to Lactate
1044	2.080655644	-2.309	21	5	4h_MINCH_1_ctrlLPS	4h_ctrlLPS_pvalue	Rac Signaling
1045	0.97719521	NA	156	21	4h_MINCH_1_ctrlLPS	4h_ctrlLPS_pvalue	RAN Signaling
1046	0.653001963	NA	122	21	4h_MINCH_1_ctrlLPS	4h_ctrlLPS_pvalue	RAR Activation
1047	3.438396843	-1.5	82	19	4h_MINCH_1_ctrlLPS	4h_ctrlLPS_pvalue	Reelin Signaling in Neurons
1048	1.687041088	-1.89	86	5	4h_MINCH_1_ctrlLPS	4h_ctrlLPS_pvalue	Regulation of Actin-based Motility by Rho
1049	1.239872556	NA	165	21	4h_MINCH_1_ctrlLPS	4h_ctrlLPS_pvalue	Regulation of Cellular Mechanics by Calpain Protease
1050	7.849008768	-1.89	76	19	4h_MINCH_1_ctrlLPS	4h_ctrlLPS_pvalue	Regulation of eIF4 and p70S6K Signaling
1051	0.760520917	-0.905	103	20	4h_MINCH_1_ctrlLPS	4h_ctrlLPS_pvalue	Regulation Of The Epithelial Mesenchymal Transition By Growth Factors Pathway
1052	1.107322485	-1.134	106	18	4h_MINCH_1_ctrlLPS	4h_ctrlLPS_pvalue	Relaxin Signaling
1053	3.248204801	-2.828	87	15	4h_MINCH_1_ctrlLPS	4h_ctrlLPS_pvalue	Remodeling of Epithelial Adherens Junctions
1054	1.715497719	-1.342	211	18	4h_MINCH_1_ctrlLPS	4h_ctrlLPS_pvalue	Renal Cell Carcinoma Signaling
1055	1.303569972	-2.53	3	3	4h_MINCH_1_ctrlLPS	4h_ctrlLPS_pvalue	RhoA Signaling
1056	2.155508642	1.508	65	4	4h_MINCH_1_ctrlLPS	4h_ctrlLPS_pvalue	RhoGDI Signaling
1057	0.268222213	NA	187	21	4h_MINCH_1_ctrlLPS	4h_ctrlLPS_pvalue	Role of IL-17A in Psoriasis
1058	0.214022885	NA	173	21	4h_MINCH_1_ctrlLPS	4h_ctrlLPS_pvalue	Role of IL-17F in Allergic Inflammatory Airway Diseases
1059	0.39546457	NA	121	21	4h_MINCH_1_ctrlLPS	4h_ctrlLPS_pvalue	Role of JAK1, JAK2 and TYK2 in Interferon Signaling
1060	0.749911731	-1.265	73	18	4h_MINCH_1_ctrlLPS	4h_ctrlLPS_pvalue	Role of NFAT in Cardiac Hypertrophy
1061	0.76897741	NA	216	19	4h_MINCH_1_ctrlLPS	4h_ctrlLPS_pvalue	Role of PI3K/AKT Signaling in the Pathogenesis of Influenza
1062	0.97719521	1.667	36	4	4h_MINCH_1_ctrlLPS	4h_ctrlLPS_pvalue	Role of PKR in Interferon Induction and Antiviral Response
1063	0.760520917	NA	164	21	4h_MINCH_1_ctrlLPS	4h_ctrlLPS_pvalue	Role of Tissue Factor in Cancer
1064	0.644655785	NA	144	21	4h_MINCH_1_ctrlLPS	4h_ctrlLPS_pvalue	S-adenosyl-L-methionine Biosynthesis
1065	0.889391604	0	59	21	4h_MINCH_1_ctrlLPS	4h_ctrlLPS_pvalue	SAPK/JNK Signaling
1066	0.398008847	NA	24	21	4h_MINCH_1_ctrlLPS	4h_ctrlLPS_pvalue	Selenocysteine Biosynthesis II (Archaea and Eukaryotes)
1067	0.165773638	NA	20	21	4h_MINCH_1_ctrlLPS	4h_ctrlLPS_pvalue	Semaphorin Signaling in Neurons
1068	0.477025036	NA	133	21	4h_MINCH_1_ctrlLPS	4h_ctrlLPS_pvalue	Serine Biosynthesis
1069	2.52687231	-1.807	42	5	4h_MINCH_1_ctrlLPS	4h_ctrlLPS_pvalue	Signaling by Rho Family GTPases
1070	2.503725843	-1.604	113	10	4h_MINCH_1_ctrlLPS	4h_ctrlLPS_pvalue	Sirtuin Signaling Pathway
1071	0	NA	145	21	4h_MINCH_1_ctrlLPS	4h_ctrlLPS_pvalue	Sorbitol Degradation I
1072	0.732870746	-1	206	18	4h_MINCH_1_ctrlLPS	4h_ctrlLPS_pvalue	SPINK1 Pancreatic Cancer Pathway
1073	0.892147968	-2.236	51	15	4h_MINCH_1_ctrlLPS	4h_ctrlLPS_pvalue	Spliceosomal Cycle
1074	0.829255754	NA	37	21	4h_MINCH_1_ctrlLPS	4h_ctrlLPS_pvalue	Sucrose Degradation V (Mammalian)
1075	0.800441625	NA	170	21	4h_MINCH_1_ctrlLPS	4h_ctrlLPS_pvalue	Sulfate Activation for Sulfonation
1076	0.900177271	-1	77	10	4h_MINCH_1_ctrlLPS	4h_ctrlLPS_pvalue	Sumoylation Pathway
1077	0.331929033	NA	218	19	4h_MINCH_1_ctrlLPS	4h_ctrlLPS_pvalue	Superoxide Radicals Degradation
1078	0	NA	100	17	4h_MINCH_1_ctrlLPS	4h_ctrlLPS_pvalue	Superpathway of Cholesterol Biosynthesis
1079	0.200970991	NA	220	17	4h_MINCH_1_ctrlLPS	4h_ctrlLPS_pvalue	Superpathway of Geranylgeranyldiphosphate Biosynthesis I (via Mevalonate)
1080	0.557148643	NA	197	21	4h_MINCH_1_ctrlLPS	4h_ctrlLPS_pvalue	Superpathway of Methionine Degradation
1081	0.979569062	NA	34	21	4h_MINCH_1_ctrlLPS	4h_ctrlLPS_pvalue	Superpathway of Serine and Glycine Biosynthesis I
1082	1.010203847	-1.698	78	18	4h_MINCH_1_ctrlLPS	4h_ctrlLPS_pvalue	Synaptogenesis Signaling Pathway
1083	1.215029815	-2	79	15	4h_MINCH_1_ctrlLPS	4h_ctrlLPS_pvalue	TCA Cycle II (Eukaryotic)
1084	0.574343039	0.447	47	11	4h_MINCH_1_ctrlLPS	4h_ctrlLPS_pvalue	Tec Kinase Signaling
1085	0.849286663	-2.646	91	7	4h_MINCH_1_ctrlLPS	4h_ctrlLPS_pvalue	Telomerase Signaling
1086	1.010203847	NA	184	21	4h_MINCH_1_ctrlLPS	4h_ctrlLPS_pvalue	Telomere Extension by Telomerase
1087	0.389848508	1	15	4	4h_MINCH_1_ctrlLPS	4h_ctrlLPS_pvalue	Th17 Activation Pathway
1088	0.829255754	-2.121	119	19	4h_MINCH_1_ctrlLPS	4h_ctrlLPS_pvalue	Thrombin Signaling
1089	0.844888651	NA	124	21	4h_MINCH_1_ctrlLPS	4h_ctrlLPS_pvalue	Tight Junction Signaling
1090	0.816679482	0	135	21	4h_MINCH_1_ctrlLPS	4h_ctrlLPS_pvalue	Triacylglycerol Degradation
1091	2.666175005	-0.707	55	21	4h_MINCH_1_ctrlLPS	4h_ctrlLPS_pvalue	tRNA Charging
1092	0.148751381	NA	212	17	4h_MINCH_1_ctrlLPS	4h_ctrlLPS_pvalue	Tryptophan Degradation III (Eukaryotic)
1093	0.141511416	NA	136	21	4h_MINCH_1_ctrlLPS	4h_ctrlLPS_pvalue	Tumoricidal Function of Hepatic Natural Killer Cells
1094	0.644655785	NA	141	21	4h_MINCH_1_ctrlLPS	4h_ctrlLPS_pvalue	UDP-D-xylose and UDP-D-glucuronate Biosynthesis
1095	0	NA	157	21	4h_MINCH_1_ctrlLPS	4h_ctrlLPS_pvalue	UDP-N-acetyl-D-galactosamine Biosynthesis I
1096	2.419619764	-2.828	14	3	4h_MINCH_1_ctrlLPS	4h_ctrlLPS_pvalue	Unfolded protein response
1097	0.453467032	NA	209	17	4h_MINCH_1_ctrlLPS	4h_ctrlLPS_pvalue	Valine Degradation I
1098	2.03805846	-1.134	63	19	4h_MINCH_1_ctrlLPS	4h_ctrlLPS_pvalue	VEGF Signaling
1099	1.11198448	NA	152	21	4h_MINCH_1_ctrlLPS	4h_ctrlLPS_pvalue	Virus Entry via Endocytic Pathways
1100	0.175161651	NA	155	21	4h_MINCH_1_ctrlLPS	4h_ctrlLPS_pvalue	Vitamin-C Transport
1101	1.043556117	1.134	70	11	4h_MINCH_1_ctrlLPS	4h_ctrlLPS_pvalue	Xenobiotic Metabolism AHR Signaling Pathway
1102	0.599708754	0.333	115	17	4h_MINCH_1_ctrlLPS	4h_ctrlLPS_pvalue	Xenobiotic Metabolism CAR Signaling Pathway
1103	0.200970991	1.633	39	11	4h_MINCH_1_ctrlLPS	4h_ctrlLPS_pvalue	Xenobiotic Metabolism PXR Signaling Pathway
1104	0.7137474	NA	33	21	4h_MINCH_1_ctrlLPS	4h_ctrlLPS_pvalue	Xenobiotic Metabolism Signaling
1105	0	NA	186	21	4h_MINCH_1_ctrlLPS	4h_ctrlLPS_pvalue	Zymosterol Biosynthesis
1106	0.43031278	NA	221	18	4h_MINCH_2_ctrlLPS	4h_ctrlLPS_pvalue	?-Adrenergic Signaling
1107	0.246765168	NA	138	21	4h_MINCH_2_ctrlLPS	4h_ctrlLPS_pvalue	?-glutamyl Cycle
1108	0.763961968	-2.646	11	8	4h_MINCH_2_ctrlLPS	4h_ctrlLPS_pvalue	14-3-3-mediated Signaling
1109	1.236063661	NA	194	21	4h_MINCH_2_ctrlLPS	4h_ctrlLPS_pvalue	2-ketoglutarate Dehydrogenase Complex
1110	0.342285488	NA	130	21	4h_MINCH_2_ctrlLPS	4h_ctrlLPS_pvalue	Acetyl-CoA Biosynthesis I (Pyruvate Dehydrogenase Complex)
1111	0.733912233	NA	160	21	4h_MINCH_2_ctrlLPS	4h_ctrlLPS_pvalue	Acetyl-CoA Biosynthesis III (from Citrate)
1112	4.216267226	-2.4	2	3	4h_MINCH_2_ctrlLPS	4h_ctrlLPS_pvalue	Actin Cytoskeleton Signaling
1113	1.86759715	-1.667	114	15	4h_MINCH_2_ctrlLPS	4h_ctrlLPS_pvalue	Actin Nucleation by ARP-WASP Complex
1114	0	NA	154	21	4h_MINCH_2_ctrlLPS	4h_ctrlLPS_pvalue	Acyl Carrier Protein Metabolism
1115	0.733912233	NA	150	21	4h_MINCH_2_ctrlLPS	4h_ctrlLPS_pvalue	Adenine and Adenosine Salvage VI
1116	0.8832243	NA	28	21	4h_MINCH_2_ctrlLPS	4h_ctrlLPS_pvalue	Agranulocyte Adhesion and Diapedesis
1117	1.444513476	NA	147	21	4h_MINCH_2_ctrlLPS	4h_ctrlLPS_pvalue	Aldosterone Signaling in Epithelial Cells
1118	1.15234528	0.302	60	16	4h_MINCH_2_ctrlLPS	4h_ctrlLPS_pvalue	AMPK Signaling
1119	0.261643202	NA	171	21	4h_MINCH_2_ctrlLPS	4h_ctrlLPS_pvalue	Amyloid Processing
1120	0.150834843	NA	199	18	4h_MINCH_2_ctrlLPS	4h_ctrlLPS_pvalue	Angiopoietin Signaling
1121	0.650620172	NA	32	21	4h_MINCH_2_ctrlLPS	4h_ctrlLPS_pvalue	Antigen Presentation Pathway
1122	0.657738151	-1	75	19	4h_MINCH_2_ctrlLPS	4h_ctrlLPS_pvalue	Antiproliferative Role of Somatostatin Receptor 2
1123	0.383838122	NA	116	22	4h_MINCH_2_ctrlLPS	4h_ctrlLPS_pvalue	Antiproliferative Role of TOB in T Cell Signaling
1124	2.133177079	-1.667	71	14	4h_MINCH_2_ctrlLPS	4h_ctrlLPS_pvalue	Apelin Adipocyte Signaling Pathway
1125	0.674182955	-2.646	69	12	4h_MINCH_2_ctrlLPS	4h_ctrlLPS_pvalue	Apelin Cardiomyocyte Signaling Pathway
1126	0.148155739	0	214	21	4h_MINCH_2_ctrlLPS	4h_ctrlLPS_pvalue	Apoptosis Signaling
1127	0.383838122	NA	131	21	4h_MINCH_2_ctrlLPS	4h_ctrlLPS_pvalue	Arginine Biosynthesis IV
1128	1.372968563	1.633	68	11	4h_MINCH_2_ctrlLPS	4h_ctrlLPS_pvalue	Aryl Hydrocarbon Receptor Signaling
1129	0.954839912	NA	140	21	4h_MINCH_2_ctrlLPS	4h_ctrlLPS_pvalue	Aspartate Degradation II
1130	0.66454569	NA	26	21	4h_MINCH_2_ctrlLPS	4h_ctrlLPS_pvalue	Axonal Guidance Signaling
1131	4.672525387	-2.111	9	6	4h_MINCH_2_ctrlLPS	4h_ctrlLPS_pvalue	BAG2 Signaling Pathway
1132	1.180210823	NA	190	21	4h_MINCH_2_ctrlLPS	4h_ctrlLPS_pvalue	BER pathway
1133	0.427221678	NA	151	21	4h_MINCH_2_ctrlLPS	4h_ctrlLPS_pvalue	Branched-chain ?-keto acid Dehydrogenase Complex
1134	0.197227271	NA	201	21	4h_MINCH_2_ctrlLPS	4h_ctrlLPS_pvalue	Calcium-induced T Lymphocyte Apoptosis
1135	0.246765168	NA	104	18	4h_MINCH_2_ctrlLPS	4h_ctrlLPS_pvalue	Calcium Signaling
1136	0.854443195	0	208	18	4h_MINCH_2_ctrlLPS	4h_ctrlLPS_pvalue	Cardiac ?-adrenergic Signaling
1137	0.954839912	-0.535	58	21	4h_MINCH_2_ctrlLPS	4h_ctrlLPS_pvalue	Cardiac Hypertrophy Signaling
1138	1.03426738	NA	188	21	4h_MINCH_2_ctrlLPS	4h_ctrlLPS_pvalue	Caveolar-mediated Endocytosis Signaling
1139	0.581234507	NA	18	21	4h_MINCH_2_ctrlLPS	4h_ctrlLPS_pvalue	CCR3 Signaling in Eosinophils
1140	0.40707958	-0.816	112	19	4h_MINCH_2_ctrlLPS	4h_ctrlLPS_pvalue	CD28 Signaling in T Helper Cells
1141	0.166191495	NA	17	21	4h_MINCH_2_ctrlLPS	4h_ctrlLPS_pvalue	CD40 Signaling
1142	1.290431769	-3.162	7	6	4h_MINCH_2_ctrlLPS	4h_ctrlLPS_pvalue	Cdc42 Signaling
1143	0.415139438	1	204	20	4h_MINCH_2_ctrlLPS	4h_ctrlLPS_pvalue	Cell Cycle Control of Chromosomal Replication
1144	0.733912233	NA	31	21	4h_MINCH_2_ctrlLPS	4h_ctrlLPS_pvalue	Cell Cycle: G2/M DNA Damage Checkpoint Regulation
1145	0.190468606	0	90	19	4h_MINCH_2_ctrlLPS	4h_ctrlLPS_pvalue	Ceramide Signaling
1146	0.22932174	-1	92	19	4h_MINCH_2_ctrlLPS	4h_ctrlLPS_pvalue	Chemokine Signaling
1147	0.49547116	NA	125	21	4h_MINCH_2_ctrlLPS	4h_ctrlLPS_pvalue	Chronic Myeloid Leukemia Signaling
1148	1.060929089	NA	16	21	4h_MINCH_2_ctrlLPS	4h_ctrlLPS_pvalue	Citrulline Biosynthesis
1149	1.67399191	NA	175	21	4h_MINCH_2_ctrlLPS	4h_ctrlLPS_pvalue	Clathrin-mediated Endocytosis Signaling
1150	0.729868624	0.905	94	16	4h_MINCH_2_ctrlLPS	4h_ctrlLPS_pvalue	Colorectal Cancer Metastasis Signaling
1151	6.114793883	3.411	1	1	4h_MINCH_2_ctrlLPS	4h_ctrlLPS_pvalue	Coronavirus Pathogenesis Pathway
1152	0.197227271	NA	158	21	4h_MINCH_2_ctrlLPS	4h_ctrlLPS_pvalue	Crosstalk between Dendritic Cells and Natural Killer Cells
1153	0.729868624	NA	127	21	4h_MINCH_2_ctrlLPS	4h_ctrlLPS_pvalue	CTLA4 Signaling in Cytotoxic T Lymphocytes
1154	0.809515084	-1.265	43	19	4h_MINCH_2_ctrlLPS	4h_ctrlLPS_pvalue	CXCR4 Signaling
1155	0.139317169	NA	22	21	4h_MINCH_2_ctrlLPS	4h_ctrlLPS_pvalue	Cysteine Biosynthesis III (mammalia)
1156	0	NA	23	21	4h_MINCH_2_ctrlLPS	4h_ctrlLPS_pvalue	Cytotoxic T Lymphocyte-mediated Apoptosis of Target Cells
1157	0	NA	183	21	4h_MINCH_2_ctrlLPS	4h_ctrlLPS_pvalue	D-mannose Degradation
1158	0.28607946	-0.447	110	21	4h_MINCH_2_ctrlLPS	4h_ctrlLPS_pvalue	Death Receptor Signaling
1159	1.03426738	NA	191	21	4h_MINCH_2_ctrlLPS	4h_ctrlLPS_pvalue	DNA Double-Strand Break Repair by Non-Homologous End Joining
1160	0	NA	177	21	4h_MINCH_2_ctrlLPS	4h_ctrlLPS_pvalue	Dopamine Degradation
1161	8.325835521	-3.638	4	2	4h_MINCH_2_ctrlLPS	4h_ctrlLPS_pvalue	EIF2 Signaling
1162	0.379518151	NA	198	21	4h_MINCH_2_ctrlLPS	4h_ctrlLPS_pvalue	Endoplasmic Reticulum Stress Pathway
1163	1.372968563	-1	217	17	4h_MINCH_2_ctrlLPS	4h_ctrlLPS_pvalue	Ephrin B Signaling
1164	1.344842202	-2.138	46	5	4h_MINCH_2_ctrlLPS	4h_ctrlLPS_pvalue	Ephrin Receptor Signaling
1165	1.372968563	NA	179	21	4h_MINCH_2_ctrlLPS	4h_ctrlLPS_pvalue	Epithelial Adherens Junction Signaling
1166	1.372968563	-0.302	99	19	4h_MINCH_2_ctrlLPS	4h_ctrlLPS_pvalue	ERK/MAPK Signaling
1167	0.650620172	-2.449	83	15	4h_MINCH_2_ctrlLPS	4h_ctrlLPS_pvalue	ERK5 Signaling
1168	0.23251125	NA	192	21	4h_MINCH_2_ctrlLPS	4h_ctrlLPS_pvalue	Estrogen Biosynthesis
1169	1.514398974	-0.688	93	19	4h_MINCH_2_ctrlLPS	4h_ctrlLPS_pvalue	Estrogen Receptor Signaling
1170	1.236063661	1.633	98	20	4h_MINCH_2_ctrlLPS	4h_ctrlLPS_pvalue	FAT10 Cancer Signaling Pathway
1171	0.86110027	NA	205	16	4h_MINCH_2_ctrlLPS	4h_ctrlLPS_pvalue	FAT10 Signaling Pathway
1172	3.620398271	-1.414	38	19	4h_MINCH_2_ctrlLPS	4h_ctrlLPS_pvalue	Fatty Acid ?-oxidation I
1173	2.366643846	-3.464	12	9	4h_MINCH_2_ctrlLPS	4h_ctrlLPS_pvalue	Fc? Receptor-mediated Phagocytosis in Macrophages and Monocytes
1174	2.168547953	-1.732	108	7	4h_MINCH_2_ctrlLPS	4h_ctrlLPS_pvalue	fMLP Signaling in Neutrophils
1175	0.383838122	NA	166	21	4h_MINCH_2_ctrlLPS	4h_ctrlLPS_pvalue	Folate Polyglutamylation
1176	0.246765168	NA	10	21	4h_MINCH_2_ctrlLPS	4h_ctrlLPS_pvalue	Folate Transformations I
1177	0.536195226	NA	128	21	4h_MINCH_2_ctrlLPS	4h_ctrlLPS_pvalue	G Protein Signaling Mediated by Tubby
1178	0.657738151	0.333	45	20	4h_MINCH_2_ctrlLPS	4h_ctrlLPS_pvalue	G?q Signaling
1179	2.69848877	NA	178	21	4h_MINCH_2_ctrlLPS	4h_ctrlLPS_pvalue	Germ Cell-Sertoli Cell Junction Signaling
1180	0.688305914	-0.816	101	18	4h_MINCH_2_ctrlLPS	4h_ctrlLPS_pvalue	Glioma Invasiveness Signaling
1181	1.063472116	NA	172	21	4h_MINCH_2_ctrlLPS	4h_ctrlLPS_pvalue	Glucocorticoid Receptor Signaling
1182	1.236063661	-2	102	13	4h_MINCH_2_ctrlLPS	4h_ctrlLPS_pvalue	Gluconeogenesis I
1183	0.469190489	NA	118	21	4h_MINCH_2_ctrlLPS	4h_ctrlLPS_pvalue	Glutamate Receptor Signaling
1184	0	NA	62	21	4h_MINCH_2_ctrlLPS	4h_ctrlLPS_pvalue	Glutamate Removal from Folates
1185	0.733912233	NA	169	21	4h_MINCH_2_ctrlLPS	4h_ctrlLPS_pvalue	Glutamine Degradation I
1186	2.340821683	-1.342	215	17	4h_MINCH_2_ctrlLPS	4h_ctrlLPS_pvalue	Glutaryl-CoA Degradation
1187	0.729868624	NA	207	21	4h_MINCH_2_ctrlLPS	4h_ctrlLPS_pvalue	Glutathione-mediated Detoxification
1188	0.482403627	NA	126	21	4h_MINCH_2_ctrlLPS	4h_ctrlLPS_pvalue	Glutathione Biosynthesis
1189	0.392613003	NA	195	21	4h_MINCH_2_ctrlLPS	4h_ctrlLPS_pvalue	Glutathione Redox Reactions I
1190	0.427221678	NA	27	21	4h_MINCH_2_ctrlLPS	4h_ctrlLPS_pvalue	Glutathione Redox Reactions II
1191	0.342285488	NA	193	21	4h_MINCH_2_ctrlLPS	4h_ctrlLPS_pvalue	Glycine Cleavage Complex
1192	0.581234507	NA	167	21	4h_MINCH_2_ctrlLPS	4h_ctrlLPS_pvalue	Glycine Degradation (Creatine Biosynthesis)
1193	0.342285488	NA	148	21	4h_MINCH_2_ctrlLPS	4h_ctrlLPS_pvalue	Glycogen Biosynthesis II (from UDP-D-Glucose)
1194	1.236063661	-2	56	13	4h_MINCH_2_ctrlLPS	4h_ctrlLPS_pvalue	Glycolysis I
1195	0.147016056	NA	40	18	4h_MINCH_2_ctrlLPS	4h_ctrlLPS_pvalue	GM-CSF Signaling
1196	1.592205893	NA	153	21	4h_MINCH_2_ctrlLPS	4h_ctrlLPS_pvalue	Granzyme A Signaling
1197	0.447872207	NA	139	21	4h_MINCH_2_ctrlLPS	4h_ctrlLPS_pvalue	Granzyme B Signaling
1198	0	NA	196	21	4h_MINCH_2_ctrlLPS	4h_ctrlLPS_pvalue	Heme Biosynthesis II
1199	3.216459538	-0.655	85	19	4h_MINCH_2_ctrlLPS	4h_ctrlLPS_pvalue	HIF1? Signaling
1200	2.340821683	1.414	52	20	4h_MINCH_2_ctrlLPS	4h_ctrlLPS_pvalue	HIPPO signaling
1201	1.514398974	0.447	107	11	4h_MINCH_2_ctrlLPS	4h_ctrlLPS_pvalue	Huntington's Disease Signaling
1202	1.295710564	NA	159	21	4h_MINCH_2_ctrlLPS	4h_ctrlLPS_pvalue	Hypoxia Signaling in the Cardiovascular System
1203	1.027394996	0	64	18	4h_MINCH_2_ctrlLPS	4h_ctrlLPS_pvalue	IGF-1 Signaling
1204	0.66950949	NA	176	21	4h_MINCH_2_ctrlLPS	4h_ctrlLPS_pvalue	IL-10 Signaling
1205	0.401808896	0.447	117	20	4h_MINCH_2_ctrlLPS	4h_ctrlLPS_pvalue	IL-15 Signaling
1206	0.498427101	1	213	20	4h_MINCH_2_ctrlLPS	4h_ctrlLPS_pvalue	IL-17A Signaling in Airway Cells
1207	0.519115191	2	49	20	4h_MINCH_2_ctrlLPS	4h_ctrlLPS_pvalue	IL-23 Signaling Pathway
1208	0.206788431	1	72	20	4h_MINCH_2_ctrlLPS	4h_ctrlLPS_pvalue	IL-3 Signaling
1209	3.022044483	-1.698	5	5	4h_MINCH_2_ctrlLPS	4h_ctrlLPS_pvalue	IL-8 Signaling
1210	2.917505778	-1.698	96	7	4h_MINCH_2_ctrlLPS	4h_ctrlLPS_pvalue	ILK Signaling
1211	0	NA	35	19	4h_MINCH_2_ctrlLPS	4h_ctrlLPS_pvalue	Induction of Apoptosis by HIV1
1212	0.729868624	NA	134	21	4h_MINCH_2_ctrlLPS	4h_ctrlLPS_pvalue	Inflammasome pathway
1213	2.959831775	-1.291	89	12	4h_MINCH_2_ctrlLPS	4h_ctrlLPS_pvalue	Inhibition of ARE-Mediated mRNA Degradation Pathway
1214	0.295733545	NA	30	21	4h_MINCH_2_ctrlLPS	4h_ctrlLPS_pvalue	iNOS Signaling
1215	0.723197998	-1.387	84	12	4h_MINCH_2_ctrlLPS	4h_ctrlLPS_pvalue	Insulin Secretion Signaling Pathway
1216	2.953523812	-1.606	105	15	4h_MINCH_2_ctrlLPS	4h_ctrlLPS_pvalue	Integrin Signaling
1217	0.688305914	1	203	20	4h_MINCH_2_ctrlLPS	4h_ctrlLPS_pvalue	Interferon Signaling
1218	0.226731275	NA	143	21	4h_MINCH_2_ctrlLPS	4h_ctrlLPS_pvalue	Iron homeostasis signaling pathway
1219	3.216459538	-1.633	74	17	4h_MINCH_2_ctrlLPS	4h_ctrlLPS_pvalue	Isoleucine Degradation I
1220	0.530200804	0.816	95	20	4h_MINCH_2_ctrlLPS	4h_ctrlLPS_pvalue	JAK/Stat Signaling
1221	1.236063661	NA	202	21	4h_MINCH_2_ctrlLPS	4h_ctrlLPS_pvalue	Ketogenesis
1222	1.521602172	NA	180	21	4h_MINCH_2_ctrlLPS	4h_ctrlLPS_pvalue	Ketolysis
1223	0.427221678	NA	182	21	4h_MINCH_2_ctrlLPS	4h_ctrlLPS_pvalue	Lactose Degradation III
1224	0	NA	163	21	4h_MINCH_2_ctrlLPS	4h_ctrlLPS_pvalue	Leucine Degradation I
1225	3.461389004	-1.789	57	5	4h_MINCH_2_ctrlLPS	4h_ctrlLPS_pvalue	Leukocyte Extravasation Signaling
1226	1.143289128	NA	41	21	4h_MINCH_2_ctrlLPS	4h_ctrlLPS_pvalue	Lipid Antigen Presentation by CD1
1227	0.3665199	NA	67	22	4h_MINCH_2_ctrlLPS	4h_ctrlLPS_pvalue	LXR/RXR Activation
1228	0.582598875	NA	19	21	4h_MINCH_2_ctrlLPS	4h_ctrlLPS_pvalue	Mechanisms of Viral Exit from Host Cells
1229	0.153634312	NA	129	21	4h_MINCH_2_ctrlLPS	4h_ctrlLPS_pvalue	Methionine Degradation I (to Homocysteine)
1230	0	NA	162	21	4h_MINCH_2_ctrlLPS	4h_ctrlLPS_pvalue	Methylthiopropionate Biosynthesis
1231	1.79471735	-1	111	17	4h_MINCH_2_ctrlLPS	4h_ctrlLPS_pvalue	Mevalonate Pathway I
1232	3.022044483	NA	168	21	4h_MINCH_2_ctrlLPS	4h_ctrlLPS_pvalue	Mitochondrial Dysfunction
1233	1.236063661	NA	25	21	4h_MINCH_2_ctrlLPS	4h_ctrlLPS_pvalue	Mitotic Roles of Polo-Like Kinase
1234	4.089788303	-1	50	18	4h_MINCH_2_ctrlLPS	4h_ctrlLPS_pvalue	mTOR Signaling
1235	0.657738151	-1.155	97	17	4h_MINCH_2_ctrlLPS	4h_ctrlLPS_pvalue	Natural Killer Cell Signaling
1236	0.225419271	-1.134	29	10	4h_MINCH_2_ctrlLPS	4h_ctrlLPS_pvalue	Necroptosis Signaling Pathway
1237	0.427221678	NA	109	18	4h_MINCH_2_ctrlLPS	4h_ctrlLPS_pvalue	Neuregulin Signaling
1238	0.482403627	0	210	16	4h_MINCH_2_ctrlLPS	4h_ctrlLPS_pvalue	Neuroprotective Role of THOP1 in Alzheimer's Disease
1239	4.066355395	-2.309	6	3	4h_MINCH_2_ctrlLPS	4h_ctrlLPS_pvalue	NRF2-mediated Oxidative Stress Response
1240	0.197725383	NA	161	21	4h_MINCH_2_ctrlLPS	4h_ctrlLPS_pvalue	Nucleotide Excision Repair Pathway
1241	1.372968563	0	81	5	4h_MINCH_2_ctrlLPS	4h_ctrlLPS_pvalue	Oxidative Phosphorylation
1242	0.495159075	0.378	80	20	4h_MINCH_2_ctrlLPS	4h_ctrlLPS_pvalue	P2Y Purigenic Receptor Signaling Pathway
1243	1.976461988	-1.414	53	12	4h_MINCH_2_ctrlLPS	4h_ctrlLPS_pvalue	p70S6K Signaling
1244	0.91139138	0	200	21	4h_MINCH_2_ctrlLPS	4h_ctrlLPS_pvalue	Pancreatic Adenocarcinoma Signaling
1245	0.210761775	NA	123	21	4h_MINCH_2_ctrlLPS	4h_ctrlLPS_pvalue	Parkinson's Signaling
1246	1.670509042	-2.828	66	13	4h_MINCH_2_ctrlLPS	4h_ctrlLPS_pvalue	Paxillin Signaling
1247	0.197227271	1	88	20	4h_MINCH_2_ctrlLPS	4h_ctrlLPS_pvalue	PDGF Signaling
1248	2.227925687	-2	219	17	4h_MINCH_2_ctrlLPS	4h_ctrlLPS_pvalue	Pentose Phosphate Pathway
1249	0.954839912	NA	181	21	4h_MINCH_2_ctrlLPS	4h_ctrlLPS_pvalue	Pentose Phosphate Pathway (Non-oxidative Branch)
1250	1.236063661	NA	189	21	4h_MINCH_2_ctrlLPS	4h_ctrlLPS_pvalue	Pentose Phosphate Pathway (Oxidative Branch)
1251	0.284402023	NA	149	21	4h_MINCH_2_ctrlLPS	4h_ctrlLPS_pvalue	PFKFB4 Signaling Pathway
1252	3.313032958	NA	174	21	4h_MINCH_2_ctrlLPS	4h_ctrlLPS_pvalue	Phagosome Maturation
1253	0	NA	132	21	4h_MINCH_2_ctrlLPS	4h_ctrlLPS_pvalue	Phenylalanine Degradation IV (Mammalian, via Side Chain)
1254	0	NA	146	21	4h_MINCH_2_ctrlLPS	4h_ctrlLPS_pvalue	Phenylethylamine Degradation I
1255	1.057515377	-1.941	13	7	4h_MINCH_2_ctrlLPS	4h_ctrlLPS_pvalue	PI3K/AKT Signaling
1256	0.729868624	NA	8	21	4h_MINCH_2_ctrlLPS	4h_ctrlLPS_pvalue	Polyamine Regulation in Colon Cancer
1257	0.383838122	0.816	48	11	4h_MINCH_2_ctrlLPS	4h_ctrlLPS_pvalue	PPAR Signaling
1258	1.313128482	0	54	20	4h_MINCH_2_ctrlLPS	4h_ctrlLPS_pvalue	PPAR?/RXR? Activation
1259	1.266503491	0.832	61	20	4h_MINCH_2_ctrlLPS	4h_ctrlLPS_pvalue	Production of Nitric Oxide and Reactive Oxygen Species in Macrophages
1260	0.649545443	NA	185	21	4h_MINCH_2_ctrlLPS	4h_ctrlLPS_pvalue	Prostate Cancer Signaling
1261	1.031940724	-1	44	19	4h_MINCH_2_ctrlLPS	4h_ctrlLPS_pvalue	Protein Kinase A Signaling
1262	4.672525387	NA	137	21	4h_MINCH_2_ctrlLPS	4h_ctrlLPS_pvalue	Protein Ubiquitination Pathway
1263	0.210761775	NA	120	21	4h_MINCH_2_ctrlLPS	4h_ctrlLPS_pvalue	Purine Nucleotides De Novo Biosynthesis II
1264	1.236063661	NA	142	21	4h_MINCH_2_ctrlLPS	4h_ctrlLPS_pvalue	Pyruvate Fermentation to Lactate
1265	2.823759998	-1.941	21	5	4h_MINCH_2_ctrlLPS	4h_ctrlLPS_pvalue	Rac Signaling
1266	0.915133569	NA	156	21	4h_MINCH_2_ctrlLPS	4h_ctrlLPS_pvalue	RAN Signaling
1267	0.507258764	NA	122	21	4h_MINCH_2_ctrlLPS	4h_ctrlLPS_pvalue	RAR Activation
1268	0.507433107	-0.707	82	19	4h_MINCH_2_ctrlLPS	4h_ctrlLPS_pvalue	Reelin Signaling in Neurons
1269	2.552551351	-1.667	86	5	4h_MINCH_2_ctrlLPS	4h_ctrlLPS_pvalue	Regulation of Actin-based Motility by Rho
1270	0.830177637	NA	165	21	4h_MINCH_2_ctrlLPS	4h_ctrlLPS_pvalue	Regulation of Cellular Mechanics by Calpain Protease
1271	4.209671109	-1	76	19	4h_MINCH_2_ctrlLPS	4h_ctrlLPS_pvalue	Regulation of eIF4 and p70S6K Signaling
1272	0.330016656	0.333	103	20	4h_MINCH_2_ctrlLPS	4h_ctrlLPS_pvalue	Regulation Of The Epithelial Mesenchymal Transition By Growth Factors Pathway
1273	0.536195226	0.447	106	18	4h_MINCH_2_ctrlLPS	4h_ctrlLPS_pvalue	Relaxin Signaling
1274	3.821572585	-1.89	87	15	4h_MINCH_2_ctrlLPS	4h_ctrlLPS_pvalue	Remodeling of Epithelial Adherens Junctions
1275	0.582598875	NA	211	18	4h_MINCH_2_ctrlLPS	4h_ctrlLPS_pvalue	Renal Cell Carcinoma Signaling
1276	1.530017493	-2.714	3	3	4h_MINCH_2_ctrlLPS	4h_ctrlLPS_pvalue	RhoA Signaling
1277	4.066355395	1.5	65	4	4h_MINCH_2_ctrlLPS	4h_ctrlLPS_pvalue	RhoGDI Signaling
1278	0.19851757	NA	187	21	4h_MINCH_2_ctrlLPS	4h_ctrlLPS_pvalue	Role of IL-17A in Psoriasis
1279	0.157476548	NA	173	21	4h_MINCH_2_ctrlLPS	4h_ctrlLPS_pvalue	Role of IL-17F in Allergic Inflammatory Airway Diseases
1280	1.684884995	NA	121	21	4h_MINCH_2_ctrlLPS	4h_ctrlLPS_pvalue	Role of JAK1, JAK2 and TYK2 in Interferon Signaling
1281	0.331858559	0	73	18	4h_MINCH_2_ctrlLPS	4h_ctrlLPS_pvalue	Role of NFAT in Cardiac Hypertrophy
1282	0.213943464	NA	216	19	4h_MINCH_2_ctrlLPS	4h_ctrlLPS_pvalue	Role of PI3K/AKT Signaling in the Pathogenesis of Influenza
1283	3.102017213	2.324	36	4	4h_MINCH_2_ctrlLPS	4h_ctrlLPS_pvalue	Role of PKR in Interferon Induction and Antiviral Response
1284	0.43031278	NA	164	21	4h_MINCH_2_ctrlLPS	4h_ctrlLPS_pvalue	Role of Tissue Factor in Cancer
1285	0	NA	144	21	4h_MINCH_2_ctrlLPS	4h_ctrlLPS_pvalue	S-adenosyl-L-methionine Biosynthesis
1286	0.214305868	-0.447	59	21	4h_MINCH_2_ctrlLPS	4h_ctrlLPS_pvalue	SAPK/JNK Signaling
1287	0	NA	24	21	4h_MINCH_2_ctrlLPS	4h_ctrlLPS_pvalue	Selenocysteine Biosynthesis II (Archaea and Eukaryotes)
1288	1.507222698	NA	20	21	4h_MINCH_2_ctrlLPS	4h_ctrlLPS_pvalue	Semaphorin Signaling in Neurons
1289	0.427221678	NA	133	21	4h_MINCH_2_ctrlLPS	4h_ctrlLPS_pvalue	Serine Biosynthesis
1290	4.216267226	-1.147	42	5	4h_MINCH_2_ctrlLPS	4h_ctrlLPS_pvalue	Signaling by Rho Family GTPases
1291	6.114793883	-2.2	113	10	4h_MINCH_2_ctrlLPS	4h_ctrlLPS_pvalue	Sirtuin Signaling Pathway
1292	0	NA	145	21	4h_MINCH_2_ctrlLPS	4h_ctrlLPS_pvalue	Sorbitol Degradation I
1293	0.37665882	NA	206	18	4h_MINCH_2_ctrlLPS	4h_ctrlLPS_pvalue	SPINK1 Pancreatic Cancer Pathway
1294	1.236063661	-2.449	51	15	4h_MINCH_2_ctrlLPS	4h_ctrlLPS_pvalue	Spliceosomal Cycle
1295	0.267942179	NA	37	21	4h_MINCH_2_ctrlLPS	4h_ctrlLPS_pvalue	Sucrose Degradation V (Mammalian)
1296	0	NA	170	21	4h_MINCH_2_ctrlLPS	4h_ctrlLPS_pvalue	Sulfate Activation for Sulfonation
1297	2.227925687	-0.707	77	10	4h_MINCH_2_ctrlLPS	4h_ctrlLPS_pvalue	Sumoylation Pathway
1298	1.521602172	NA	218	19	4h_MINCH_2_ctrlLPS	4h_ctrlLPS_pvalue	Superoxide Radicals Degradation
1299	1.414506203	-1.342	100	17	4h_MINCH_2_ctrlLPS	4h_ctrlLPS_pvalue	Superpathway of Cholesterol Biosynthesis
1300	1.450383337	-1	220	17	4h_MINCH_2_ctrlLPS	4h_ctrlLPS_pvalue	Superpathway of Geranylgeranyldiphosphate Biosynthesis I (via Mevalonate)
1301	0.213943464	NA	197	21	4h_MINCH_2_ctrlLPS	4h_ctrlLPS_pvalue	Superpathway of Methionine Degradation
1302	0.954839912	NA	34	21	4h_MINCH_2_ctrlLPS	4h_ctrlLPS_pvalue	Superpathway of Serine and Glycine Biosynthesis I
1303	0.507258764	-0.775	78	18	4h_MINCH_2_ctrlLPS	4h_ctrlLPS_pvalue	Synaptogenesis Signaling Pathway
1304	1.236063661	-2	79	15	4h_MINCH_2_ctrlLPS	4h_ctrlLPS_pvalue	TCA Cycle II (Eukaryotic)
1305	1.588675337	0.632	47	11	4h_MINCH_2_ctrlLPS	4h_ctrlLPS_pvalue	Tec Kinase Signaling
1306	1.027394996	-1.134	91	7	4h_MINCH_2_ctrlLPS	4h_ctrlLPS_pvalue	Telomerase Signaling
1307	0.969493742	NA	184	21	4h_MINCH_2_ctrlLPS	4h_ctrlLPS_pvalue	Telomere Extension by Telomerase
1308	1.450383337	2.828	15	4	4h_MINCH_2_ctrlLPS	4h_ctrlLPS_pvalue	Th17 Activation Pathway
1309	0.650620172	-0.707	119	19	4h_MINCH_2_ctrlLPS	4h_ctrlLPS_pvalue	Thrombin Signaling
1310	2.23483513	NA	124	21	4h_MINCH_2_ctrlLPS	4h_ctrlLPS_pvalue	Tight Junction Signaling
1311	0.19851757	NA	135	21	4h_MINCH_2_ctrlLPS	4h_ctrlLPS_pvalue	Triacylglycerol Degradation
1312	2.744065963	-0.707	55	21	4h_MINCH_2_ctrlLPS	4h_ctrlLPS_pvalue	tRNA Charging
1313	1.684884995	-1.342	212	17	4h_MINCH_2_ctrlLPS	4h_ctrlLPS_pvalue	Tryptophan Degradation III (Eukaryotic)
1314	0	NA	136	21	4h_MINCH_2_ctrlLPS	4h_ctrlLPS_pvalue	Tumoricidal Function of Hepatic Natural Killer Cells
1315	0.581234507	NA	141	21	4h_MINCH_2_ctrlLPS	4h_ctrlLPS_pvalue	UDP-D-xylose and UDP-D-glucuronate Biosynthesis
1316	0	NA	157	21	4h_MINCH_2_ctrlLPS	4h_ctrlLPS_pvalue	UDP-N-acetyl-D-galactosamine Biosynthesis I
1317	2.959831775	-1.667	14	3	4h_MINCH_2_ctrlLPS	4h_ctrlLPS_pvalue	Unfolded protein response
1318	1.339175121	-1	209	17	4h_MINCH_2_ctrlLPS	4h_ctrlLPS_pvalue	Valine Degradation I
1319	1.143289128	-1.633	63	19	4h_MINCH_2_ctrlLPS	4h_ctrlLPS_pvalue	VEGF Signaling
1320	1.03426738	NA	152	21	4h_MINCH_2_ctrlLPS	4h_ctrlLPS_pvalue	Virus Entry via Endocytic Pathways
1321	0.729868624	NA	155	21	4h_MINCH_2_ctrlLPS	4h_ctrlLPS_pvalue	Vitamin-C Transport
1322	2.232667868	0.632	70	11	4h_MINCH_2_ctrlLPS	4h_ctrlLPS_pvalue	Xenobiotic Metabolism AHR Signaling Pathway
1323	0.621445075	-1.897	115	17	4h_MINCH_2_ctrlLPS	4h_ctrlLPS_pvalue	Xenobiotic Metabolism CAR Signaling Pathway
1324	0.581234507	0	39	11	4h_MINCH_2_ctrlLPS	4h_ctrlLPS_pvalue	Xenobiotic Metabolism PXR Signaling Pathway
1325	0.865651655	NA	33	21	4h_MINCH_2_ctrlLPS	4h_ctrlLPS_pvalue	Xenobiotic Metabolism Signaling
1326	0.342285488	NA	186	21	4h_MINCH_2_ctrlLPS	4h_ctrlLPS_pvalue	Zymosterol Biosynthesis
1327	0.143144752	NA	221	18	4h_MINCH_3_ctrlLPS	4h_ctrlLPS_pvalue	?-Adrenergic Signaling
1328	0.21951003	NA	138	21	4h_MINCH_3_ctrlLPS	4h_ctrlLPS_pvalue	?-glutamyl Cycle
1329	0.33082758	NA	11	8	4h_MINCH_3_ctrlLPS	4h_ctrlLPS_pvalue	14-3-3-mediated Signaling
1330	0	NA	194	21	4h_MINCH_3_ctrlLPS	4h_ctrlLPS_pvalue	2-ketoglutarate Dehydrogenase Complex
1331	0	NA	130	21	4h_MINCH_3_ctrlLPS	4h_ctrlLPS_pvalue	Acetyl-CoA Biosynthesis I (Pyruvate Dehydrogenase Complex)
1332	0	NA	160	21	4h_MINCH_3_ctrlLPS	4h_ctrlLPS_pvalue	Acetyl-CoA Biosynthesis III (from Citrate)
1333	0.324457895	-1.89	2	3	4h_MINCH_3_ctrlLPS	4h_ctrlLPS_pvalue	Actin Cytoskeleton Signaling
1334	0.21838197	NA	114	15	4h_MINCH_3_ctrlLPS	4h_ctrlLPS_pvalue	Actin Nucleation by ARP-WASP Complex
1335	0	NA	154	21	4h_MINCH_3_ctrlLPS	4h_ctrlLPS_pvalue	Acyl Carrier Protein Metabolism
1336	0.709594339	NA	150	21	4h_MINCH_3_ctrlLPS	4h_ctrlLPS_pvalue	Adenine and Adenosine Salvage VI
1337	0.511822056	NA	28	21	4h_MINCH_3_ctrlLPS	4h_ctrlLPS_pvalue	Agranulocyte Adhesion and Diapedesis
1338	0.341335324	NA	147	21	4h_MINCH_3_ctrlLPS	4h_ctrlLPS_pvalue	Aldosterone Signaling in Epithelial Cells
1339	0.155138747	-0.447	60	16	4h_MINCH_3_ctrlLPS	4h_ctrlLPS_pvalue	AMPK Signaling
1340	0	NA	171	21	4h_MINCH_3_ctrlLPS	4h_ctrlLPS_pvalue	Amyloid Processing
1341	0	NA	199	18	4h_MINCH_3_ctrlLPS	4h_ctrlLPS_pvalue	Angiopoietin Signaling
1342	0.48773582	NA	32	21	4h_MINCH_3_ctrlLPS	4h_ctrlLPS_pvalue	Antigen Presentation Pathway
1343	0.198210642	NA	75	19	4h_MINCH_3_ctrlLPS	4h_ctrlLPS_pvalue	Antiproliferative Role of Somatostatin Receptor 2
1344	0.198210642	NA	116	22	4h_MINCH_3_ctrlLPS	4h_ctrlLPS_pvalue	Antiproliferative Role of TOB in T Cell Signaling
1345	1.043460155	-2.236	71	14	4h_MINCH_3_ctrlLPS	4h_ctrlLPS_pvalue	Apelin Adipocyte Signaling Pathway
1346	0.881467051	-2.449	69	12	4h_MINCH_3_ctrlLPS	4h_ctrlLPS_pvalue	Apelin Cardiomyocyte Signaling Pathway
1347	0	NA	214	21	4h_MINCH_3_ctrlLPS	4h_ctrlLPS_pvalue	Apoptosis Signaling
1348	0	NA	131	21	4h_MINCH_3_ctrlLPS	4h_ctrlLPS_pvalue	Arginine Biosynthesis IV
1349	0.941643604	1	68	11	4h_MINCH_3_ctrlLPS	4h_ctrlLPS_pvalue	Aryl Hydrocarbon Receptor Signaling
1350	0.999730112	NA	140	21	4h_MINCH_3_ctrlLPS	4h_ctrlLPS_pvalue	Aspartate Degradation II
1351	0	NA	26	21	4h_MINCH_3_ctrlLPS	4h_ctrlLPS_pvalue	Axonal Guidance Signaling
1352	1.39409428	-1.342	9	6	4h_MINCH_3_ctrlLPS	4h_ctrlLPS_pvalue	BAG2 Signaling Pathway
1353	0.632121752	NA	190	21	4h_MINCH_3_ctrlLPS	4h_ctrlLPS_pvalue	BER pathway
1354	0	NA	151	21	4h_MINCH_3_ctrlLPS	4h_ctrlLPS_pvalue	Branched-chain ?-keto acid Dehydrogenase Complex
1355	0.278593544	NA	201	21	4h_MINCH_3_ctrlLPS	4h_ctrlLPS_pvalue	Calcium-induced T Lymphocyte Apoptosis
1356	0.249159249	NA	104	18	4h_MINCH_3_ctrlLPS	4h_ctrlLPS_pvalue	Calcium Signaling
1357	0.143144752	NA	208	18	4h_MINCH_3_ctrlLPS	4h_ctrlLPS_pvalue	Cardiac ?-adrenergic Signaling
1358	0.334822761	0.707	58	21	4h_MINCH_3_ctrlLPS	4h_ctrlLPS_pvalue	Cardiac Hypertrophy Signaling
1359	0.458200389	NA	188	21	4h_MINCH_3_ctrlLPS	4h_ctrlLPS_pvalue	Caveolar-mediated Endocytosis Signaling
1360	0.18681784	NA	18	21	4h_MINCH_3_ctrlLPS	4h_ctrlLPS_pvalue	CCR3 Signaling in Eosinophils
1361	0	NA	112	19	4h_MINCH_3_ctrlLPS	4h_ctrlLPS_pvalue	CD28 Signaling in T Helper Cells
1362	0	NA	17	21	4h_MINCH_3_ctrlLPS	4h_ctrlLPS_pvalue	CD40 Signaling
1363	0.315497594	-1	7	6	4h_MINCH_3_ctrlLPS	4h_ctrlLPS_pvalue	Cdc42 Signaling
1364	0.33082758	NA	204	20	4h_MINCH_3_ctrlLPS	4h_ctrlLPS_pvalue	Cell Cycle Control of Chromosomal Replication
1365	0.155138747	NA	31	21	4h_MINCH_3_ctrlLPS	4h_ctrlLPS_pvalue	Cell Cycle: G2/M DNA Damage Checkpoint Regulation
1366	0	NA	90	19	4h_MINCH_3_ctrlLPS	4h_ctrlLPS_pvalue	Ceramide Signaling
1367	0.086064549	NA	92	19	4h_MINCH_3_ctrlLPS	4h_ctrlLPS_pvalue	Chemokine Signaling
1368	0.124383585	NA	125	21	4h_MINCH_3_ctrlLPS	4h_ctrlLPS_pvalue	Chronic Myeloid Leukemia Signaling
1369	0.341335324	NA	16	21	4h_MINCH_3_ctrlLPS	4h_ctrlLPS_pvalue	Citrulline Biosynthesis
1370	0.249159249	NA	175	21	4h_MINCH_3_ctrlLPS	4h_ctrlLPS_pvalue	Clathrin-mediated Endocytosis Signaling
1371	0	NA	94	16	4h_MINCH_3_ctrlLPS	4h_ctrlLPS_pvalue	Colorectal Cancer Metastasis Signaling
1372	4.64255405	3.357	1	1	4h_MINCH_3_ctrlLPS	4h_ctrlLPS_pvalue	Coronavirus Pathogenesis Pathway
1373	0	NA	158	21	4h_MINCH_3_ctrlLPS	4h_ctrlLPS_pvalue	Crosstalk between Dendritic Cells and Natural Killer Cells
1374	0.071186589	NA	127	21	4h_MINCH_3_ctrlLPS	4h_ctrlLPS_pvalue	CTLA4 Signaling in Cytotoxic T Lymphocytes
1375	0.189428007	-0.447	43	19	4h_MINCH_3_ctrlLPS	4h_ctrlLPS_pvalue	CXCR4 Signaling
1376	0.967524225	NA	22	21	4h_MINCH_3_ctrlLPS	4h_ctrlLPS_pvalue	Cysteine Biosynthesis III (mammalia)
1377	0.085413375	NA	23	21	4h_MINCH_3_ctrlLPS	4h_ctrlLPS_pvalue	Cytotoxic T Lymphocyte-mediated Apoptosis of Target Cells
1378	0	NA	183	21	4h_MINCH_3_ctrlLPS	4h_ctrlLPS_pvalue	D-mannose Degradation
1379	0.066980131	NA	110	21	4h_MINCH_3_ctrlLPS	4h_ctrlLPS_pvalue	Death Receptor Signaling
1380	1.957133688	NA	191	21	4h_MINCH_3_ctrlLPS	4h_ctrlLPS_pvalue	DNA Double-Strand Break Repair by Non-Homologous End Joining
1381	0	NA	177	21	4h_MINCH_3_ctrlLPS	4h_ctrlLPS_pvalue	Dopamine Degradation
1382	9.614284742	-3.464	4	2	4h_MINCH_3_ctrlLPS	4h_ctrlLPS_pvalue	EIF2 Signaling
1383	0.135862642	NA	198	21	4h_MINCH_3_ctrlLPS	4h_ctrlLPS_pvalue	Endoplasmic Reticulum Stress Pathway
1384	0.445460566	NA	217	17	4h_MINCH_3_ctrlLPS	4h_ctrlLPS_pvalue	Ephrin B Signaling
1385	0.143144752	-0.447	46	5	4h_MINCH_3_ctrlLPS	4h_ctrlLPS_pvalue	Ephrin Receptor Signaling
1386	0.935458651	NA	179	21	4h_MINCH_3_ctrlLPS	4h_ctrlLPS_pvalue	Epithelial Adherens Junction Signaling
1387	0	NA	99	19	4h_MINCH_3_ctrlLPS	4h_ctrlLPS_pvalue	ERK/MAPK Signaling
1388	0.198210642	NA	83	15	4h_MINCH_3_ctrlLPS	4h_ctrlLPS_pvalue	ERK5 Signaling
1389	0.089072818	NA	192	21	4h_MINCH_3_ctrlLPS	4h_ctrlLPS_pvalue	Estrogen Biosynthesis
1390	0.303748782	-0.707	93	19	4h_MINCH_3_ctrlLPS	4h_ctrlLPS_pvalue	Estrogen Receptor Signaling
1391	0.160829838	NA	98	20	4h_MINCH_3_ctrlLPS	4h_ctrlLPS_pvalue	FAT10 Cancer Signaling Pathway
1392	0.143144752	NA	205	16	4h_MINCH_3_ctrlLPS	4h_ctrlLPS_pvalue	FAT10 Signaling Pathway
1393	1.228930334	-1	38	19	4h_MINCH_3_ctrlLPS	4h_ctrlLPS_pvalue	Fatty Acid ?-oxidation I
1394	0.758069119	-1.633	12	9	4h_MINCH_3_ctrlLPS	4h_ctrlLPS_pvalue	Fc? Receptor-mediated Phagocytosis in Macrophages and Monocytes
1395	0.33082758	-1.342	108	7	4h_MINCH_3_ctrlLPS	4h_ctrlLPS_pvalue	fMLP Signaling in Neutrophils
1396	0	NA	166	21	4h_MINCH_3_ctrlLPS	4h_ctrlLPS_pvalue	Folate Polyglutamylation
1397	0	NA	10	21	4h_MINCH_3_ctrlLPS	4h_ctrlLPS_pvalue	Folate Transformations I
1398	0.324457895	NA	128	21	4h_MINCH_3_ctrlLPS	4h_ctrlLPS_pvalue	G Protein Signaling Mediated by Tubby
1399	0	NA	45	20	4h_MINCH_3_ctrlLPS	4h_ctrlLPS_pvalue	G?q Signaling
1400	0.967524225	NA	178	21	4h_MINCH_3_ctrlLPS	4h_ctrlLPS_pvalue	Germ Cell-Sertoli Cell Junction Signaling
1401	0.103497058	NA	101	18	4h_MINCH_3_ctrlLPS	4h_ctrlLPS_pvalue	Glioma Invasiveness Signaling
1402	0.516991895	NA	172	21	4h_MINCH_3_ctrlLPS	4h_ctrlLPS_pvalue	Glucocorticoid Receptor Signaling
1403	0.89859003	NA	102	13	4h_MINCH_3_ctrlLPS	4h_ctrlLPS_pvalue	Gluconeogenesis I
1404	0.155138747	NA	118	21	4h_MINCH_3_ctrlLPS	4h_ctrlLPS_pvalue	Glutamate Receptor Signaling
1405	0	NA	62	21	4h_MINCH_3_ctrlLPS	4h_ctrlLPS_pvalue	Glutamate Removal from Folates
1406	0	NA	169	21	4h_MINCH_3_ctrlLPS	4h_ctrlLPS_pvalue	Glutamine Degradation I
1407	1.093515004	NA	215	17	4h_MINCH_3_ctrlLPS	4h_ctrlLPS_pvalue	Glutaryl-CoA Degradation
1408	0.428673055	NA	207	21	4h_MINCH_3_ctrlLPS	4h_ctrlLPS_pvalue	Glutathione-mediated Detoxification
1409	0.458200389	NA	126	21	4h_MINCH_3_ctrlLPS	4h_ctrlLPS_pvalue	Glutathione Biosynthesis
1410	0.138431639	NA	195	21	4h_MINCH_3_ctrlLPS	4h_ctrlLPS_pvalue	Glutathione Redox Reactions I
1411	0	NA	27	21	4h_MINCH_3_ctrlLPS	4h_ctrlLPS_pvalue	Glutathione Redox Reactions II
1412	0.324457895	NA	193	21	4h_MINCH_3_ctrlLPS	4h_ctrlLPS_pvalue	Glycine Cleavage Complex
1413	0.511949657	NA	167	21	4h_MINCH_3_ctrlLPS	4h_ctrlLPS_pvalue	Glycine Degradation (Creatine Biosynthesis)
1414	0	NA	148	21	4h_MINCH_3_ctrlLPS	4h_ctrlLPS_pvalue	Glycogen Biosynthesis II (from UDP-D-Glucose)
1415	0.128638458	NA	56	13	4h_MINCH_3_ctrlLPS	4h_ctrlLPS_pvalue	Glycolysis I
1416	0	NA	40	18	4h_MINCH_3_ctrlLPS	4h_ctrlLPS_pvalue	GM-CSF Signaling
1417	0.155138747	NA	153	21	4h_MINCH_3_ctrlLPS	4h_ctrlLPS_pvalue	Granzyme A Signaling
1418	0.491830813	NA	139	21	4h_MINCH_3_ctrlLPS	4h_ctrlLPS_pvalue	Granzyme B Signaling
1419	0	NA	196	21	4h_MINCH_3_ctrlLPS	4h_ctrlLPS_pvalue	Heme Biosynthesis II
1420	1.420805256	-0.577	85	19	4h_MINCH_3_ctrlLPS	4h_ctrlLPS_pvalue	HIF1? Signaling
1421	0.561267481	0	52	20	4h_MINCH_3_ctrlLPS	4h_ctrlLPS_pvalue	HIPPO signaling
1422	0.128638458	NA	107	11	4h_MINCH_3_ctrlLPS	4h_ctrlLPS_pvalue	Huntington's Disease Signaling
1423	0.709594339	NA	159	21	4h_MINCH_3_ctrlLPS	4h_ctrlLPS_pvalue	Hypoxia Signaling in the Cardiovascular System
1424	0	NA	64	18	4h_MINCH_3_ctrlLPS	4h_ctrlLPS_pvalue	IGF-1 Signaling
1425	0.100066982	NA	176	21	4h_MINCH_3_ctrlLPS	4h_ctrlLPS_pvalue	IL-10 Signaling
1426	0	NA	117	20	4h_MINCH_3_ctrlLPS	4h_ctrlLPS_pvalue	IL-15 Signaling
1427	0.116780496	NA	213	20	4h_MINCH_3_ctrlLPS	4h_ctrlLPS_pvalue	IL-17A Signaling in Airway Cells
1428	0	NA	49	20	4h_MINCH_3_ctrlLPS	4h_ctrlLPS_pvalue	IL-23 Signaling Pathway
1429	0	NA	72	20	4h_MINCH_3_ctrlLPS	4h_ctrlLPS_pvalue	IL-3 Signaling
1430	0.458200389	0	5	5	4h_MINCH_3_ctrlLPS	4h_ctrlLPS_pvalue	IL-8 Signaling
1431	0.428673055	-1.633	96	7	4h_MINCH_3_ctrlLPS	4h_ctrlLPS_pvalue	ILK Signaling
1432	0.504935243	-1	35	19	4h_MINCH_3_ctrlLPS	4h_ctrlLPS_pvalue	Induction of Apoptosis by HIV1
1433	0.135862642	NA	134	21	4h_MINCH_3_ctrlLPS	4h_ctrlLPS_pvalue	Inflammasome pathway
1434	0.324457895	-2.236	89	12	4h_MINCH_3_ctrlLPS	4h_ctrlLPS_pvalue	Inhibition of ARE-Mediated mRNA Degradation Pathway
1435	0	NA	30	21	4h_MINCH_3_ctrlLPS	4h_ctrlLPS_pvalue	iNOS Signaling
1436	0.458200389	-1	84	12	4h_MINCH_3_ctrlLPS	4h_ctrlLPS_pvalue	Insulin Secretion Signaling Pathway
1437	0.303748782	0.816	105	15	4h_MINCH_3_ctrlLPS	4h_ctrlLPS_pvalue	Integrin Signaling
1438	0.072352726	NA	203	20	4h_MINCH_3_ctrlLPS	4h_ctrlLPS_pvalue	Interferon Signaling
1439	0.085413375	NA	143	21	4h_MINCH_3_ctrlLPS	4h_ctrlLPS_pvalue	Iron homeostasis signaling pathway
1440	1.093515004	NA	74	17	4h_MINCH_3_ctrlLPS	4h_ctrlLPS_pvalue	Isoleucine Degradation I
1441	0	NA	95	20	4h_MINCH_3_ctrlLPS	4h_ctrlLPS_pvalue	JAK/Stat Signaling
1442	1.402907815	NA	202	21	4h_MINCH_3_ctrlLPS	4h_ctrlLPS_pvalue	Ketogenesis
1443	1.619580482	NA	180	21	4h_MINCH_3_ctrlLPS	4h_ctrlLPS_pvalue	Ketolysis
1444	0	NA	182	21	4h_MINCH_3_ctrlLPS	4h_ctrlLPS_pvalue	Lactose Degradation III
1445	0.21951003	NA	163	21	4h_MINCH_3_ctrlLPS	4h_ctrlLPS_pvalue	Leucine Degradation I
1446	1.228930334	-1.508	57	5	4h_MINCH_3_ctrlLPS	4h_ctrlLPS_pvalue	Leukocyte Extravasation Signaling
1447	0.124383585	NA	41	21	4h_MINCH_3_ctrlLPS	4h_ctrlLPS_pvalue	Lipid Antigen Presentation by CD1
1448	0	NA	67	22	4h_MINCH_3_ctrlLPS	4h_ctrlLPS_pvalue	LXR/RXR Activation
1449	0.458200389	NA	19	21	4h_MINCH_3_ctrlLPS	4h_ctrlLPS_pvalue	Mechanisms of Viral Exit from Host Cells
1450	1.043460155	NA	129	21	4h_MINCH_3_ctrlLPS	4h_ctrlLPS_pvalue	Methionine Degradation I (to Homocysteine)
1451	0	NA	162	21	4h_MINCH_3_ctrlLPS	4h_ctrlLPS_pvalue	Methylthiopropionate Biosynthesis
1452	1.957133688	-1	111	17	4h_MINCH_3_ctrlLPS	4h_ctrlLPS_pvalue	Mevalonate Pathway I
1453	0.458200389	NA	168	21	4h_MINCH_3_ctrlLPS	4h_ctrlLPS_pvalue	Mitochondrial Dysfunction
1454	0.89859003	NA	25	21	4h_MINCH_3_ctrlLPS	4h_ctrlLPS_pvalue	Mitotic Roles of Polo-Like Kinase
1455	2.533127972	NA	50	18	4h_MINCH_3_ctrlLPS	4h_ctrlLPS_pvalue	mTOR Signaling
1456	0.128638458	-1.342	97	17	4h_MINCH_3_ctrlLPS	4h_ctrlLPS_pvalue	Natural Killer Cell Signaling
1457	0.195686613	-1.342	29	10	4h_MINCH_3_ctrlLPS	4h_ctrlLPS_pvalue	Necroptosis Signaling Pathway
1458	0.139746719	NA	109	18	4h_MINCH_3_ctrlLPS	4h_ctrlLPS_pvalue	Neuregulin Signaling
1459	0.155138747	NA	210	16	4h_MINCH_3_ctrlLPS	4h_ctrlLPS_pvalue	Neuroprotective Role of THOP1 in Alzheimer's Disease
1460	1.59383921	-2.121	6	3	4h_MINCH_3_ctrlLPS	4h_ctrlLPS_pvalue	NRF2-mediated Oxidative Stress Response
1461	0.072352726	NA	161	21	4h_MINCH_3_ctrlLPS	4h_ctrlLPS_pvalue	Nucleotide Excision Repair Pathway
1462	0.128638458	NA	81	5	4h_MINCH_3_ctrlLPS	4h_ctrlLPS_pvalue	Oxidative Phosphorylation
1463	0.081271532	NA	80	20	4h_MINCH_3_ctrlLPS	4h_ctrlLPS_pvalue	P2Y Purigenic Receptor Signaling Pathway
1464	0.466315346	-2	53	12	4h_MINCH_3_ctrlLPS	4h_ctrlLPS_pvalue	p70S6K Signaling
1465	0.109115154	NA	200	21	4h_MINCH_3_ctrlLPS	4h_ctrlLPS_pvalue	Pancreatic Adenocarcinoma Signaling
1466	0.198210642	NA	123	21	4h_MINCH_3_ctrlLPS	4h_ctrlLPS_pvalue	Parkinson's Signaling
1467	0.212958912	NA	66	13	4h_MINCH_3_ctrlLPS	4h_ctrlLPS_pvalue	Paxillin Signaling
1468	0	NA	88	20	4h_MINCH_3_ctrlLPS	4h_ctrlLPS_pvalue	PDGF Signaling
1469	0.72989613	NA	219	17	4h_MINCH_3_ctrlLPS	4h_ctrlLPS_pvalue	Pentose Phosphate Pathway
1470	0.324457895	NA	181	21	4h_MINCH_3_ctrlLPS	4h_ctrlLPS_pvalue	Pentose Phosphate Pathway (Non-oxidative Branch)
1471	0.38949426	NA	189	21	4h_MINCH_3_ctrlLPS	4h_ctrlLPS_pvalue	Pentose Phosphate Pathway (Oxidative Branch)
1472	0.392183267	NA	149	21	4h_MINCH_3_ctrlLPS	4h_ctrlLPS_pvalue	PFKFB4 Signaling Pathway
1473	1.957133688	NA	174	21	4h_MINCH_3_ctrlLPS	4h_ctrlLPS_pvalue	Phagosome Maturation
1474	0	NA	132	21	4h_MINCH_3_ctrlLPS	4h_ctrlLPS_pvalue	Phenylalanine Degradation IV (Mammalian, via Side Chain)
1475	0	NA	146	21	4h_MINCH_3_ctrlLPS	4h_ctrlLPS_pvalue	Phenylethylamine Degradation I
1476	0.143144752	-2.236	13	7	4h_MINCH_3_ctrlLPS	4h_ctrlLPS_pvalue	PI3K/AKT Signaling
1477	0.135862642	NA	8	21	4h_MINCH_3_ctrlLPS	4h_ctrlLPS_pvalue	Polyamine Regulation in Colon Cancer
1478	0.132275873	NA	48	11	4h_MINCH_3_ctrlLPS	4h_ctrlLPS_pvalue	PPAR Signaling
1479	0.38949426	-0.378	54	20	4h_MINCH_3_ctrlLPS	4h_ctrlLPS_pvalue	PPAR?/RXR? Activation
1480	0.139588496	-0.447	61	20	4h_MINCH_3_ctrlLPS	4h_ctrlLPS_pvalue	Production of Nitric Oxide and Reactive Oxygen Species in Macrophages
1481	0.303748782	NA	185	21	4h_MINCH_3_ctrlLPS	4h_ctrlLPS_pvalue	Prostate Cancer Signaling
1482	0.374721562	0.632	44	19	4h_MINCH_3_ctrlLPS	4h_ctrlLPS_pvalue	Protein Kinase A Signaling
1483	1.596692348	NA	137	21	4h_MINCH_3_ctrlLPS	4h_ctrlLPS_pvalue	Protein Ubiquitination Pathway
1484	0.696015631	NA	120	21	4h_MINCH_3_ctrlLPS	4h_ctrlLPS_pvalue	Purine Nucleotides De Novo Biosynthesis II
1485	1.228930334	NA	142	21	4h_MINCH_3_ctrlLPS	4h_ctrlLPS_pvalue	Pyruvate Fermentation to Lactate
1486	0.108566439	NA	21	5	4h_MINCH_3_ctrlLPS	4h_ctrlLPS_pvalue	Rac Signaling
1487	1.093515004	NA	156	21	4h_MINCH_3_ctrlLPS	4h_ctrlLPS_pvalue	RAN Signaling
1488	0.33082758	NA	122	21	4h_MINCH_3_ctrlLPS	4h_ctrlLPS_pvalue	RAR Activation
1489	0.085413375	NA	82	19	4h_MINCH_3_ctrlLPS	4h_ctrlLPS_pvalue	Reelin Signaling in Neurons
1490	0.376932788	NA	86	5	4h_MINCH_3_ctrlLPS	4h_ctrlLPS_pvalue	Regulation of Actin-based Motility by Rho
1491	0.128638458	NA	165	21	4h_MINCH_3_ctrlLPS	4h_ctrlLPS_pvalue	Regulation of Cellular Mechanics by Calpain Protease
1492	4.562130555	NA	76	19	4h_MINCH_3_ctrlLPS	4h_ctrlLPS_pvalue	Regulation of eIF4 and p70S6K Signaling
1493	0.073981712	0	103	20	4h_MINCH_3_ctrlLPS	4h_ctrlLPS_pvalue	Regulation Of The Epithelial Mesenchymal Transition By Growth Factors Pathway
1494	0.132275873	NA	106	18	4h_MINCH_3_ctrlLPS	4h_ctrlLPS_pvalue	Relaxin Signaling
1495	0.881467051	NA	87	15	4h_MINCH_3_ctrlLPS	4h_ctrlLPS_pvalue	Remodeling of Epithelial Adherens Junctions
1496	0.195686613	NA	211	18	4h_MINCH_3_ctrlLPS	4h_ctrlLPS_pvalue	Renal Cell Carcinoma Signaling
1497	0.198210642	-2	3	3	4h_MINCH_3_ctrlLPS	4h_ctrlLPS_pvalue	RhoA Signaling
1498	0.982359032	0.816	65	4	4h_MINCH_3_ctrlLPS	4h_ctrlLPS_pvalue	RhoGDI Signaling
1499	0.195686613	NA	187	21	4h_MINCH_3_ctrlLPS	4h_ctrlLPS_pvalue	Role of IL-17A in Psoriasis
1500	0.060114298	NA	173	21	4h_MINCH_3_ctrlLPS	4h_ctrlLPS_pvalue	Role of IL-17F in Allergic Inflammatory Airway Diseases
1501	0.124383585	NA	121	21	4h_MINCH_3_ctrlLPS	4h_ctrlLPS_pvalue	Role of JAK1, JAK2 and TYK2 in Interferon Signaling
1502	0.165766757	0.816	73	18	4h_MINCH_3_ctrlLPS	4h_ctrlLPS_pvalue	Role of NFAT in Cardiac Hypertrophy
1503	0	NA	216	19	4h_MINCH_3_ctrlLPS	4h_ctrlLPS_pvalue	Role of PI3K/AKT Signaling in the Pathogenesis of Influenza
1504	1.17066495	0.707	36	4	4h_MINCH_3_ctrlLPS	4h_ctrlLPS_pvalue	Role of PKR in Interferon Induction and Antiviral Response
1505	0.538014676	NA	164	21	4h_MINCH_3_ctrlLPS	4h_ctrlLPS_pvalue	Role of Tissue Factor in Cancer
1506	0.511949657	NA	144	21	4h_MINCH_3_ctrlLPS	4h_ctrlLPS_pvalue	S-adenosyl-L-methionine Biosynthesis
1507	0	NA	59	21	4h_MINCH_3_ctrlLPS	4h_ctrlLPS_pvalue	SAPK/JNK Signaling
1508	0	NA	24	21	4h_MINCH_3_ctrlLPS	4h_ctrlLPS_pvalue	Selenocysteine Biosynthesis II (Archaea and Eukaryotes)
1509	0.341335324	NA	20	21	4h_MINCH_3_ctrlLPS	4h_ctrlLPS_pvalue	Semaphorin Signaling in Neurons
1510	0	NA	133	21	4h_MINCH_3_ctrlLPS	4h_ctrlLPS_pvalue	Serine Biosynthesis
1511	0.709594339	-1.342	42	5	4h_MINCH_3_ctrlLPS	4h_ctrlLPS_pvalue	Signaling by Rho Family GTPases
1512	1.480010845	-0.577	113	10	4h_MINCH_3_ctrlLPS	4h_ctrlLPS_pvalue	Sirtuin Signaling Pathway
1513	0	NA	145	21	4h_MINCH_3_ctrlLPS	4h_ctrlLPS_pvalue	Sorbitol Degradation I
1514	0.198210642	NA	206	18	4h_MINCH_3_ctrlLPS	4h_ctrlLPS_pvalue	SPINK1 Pancreatic Cancer Pathway
1515	0.38949426	NA	51	15	4h_MINCH_3_ctrlLPS	4h_ctrlLPS_pvalue	Spliceosomal Cycle
1516	0	NA	37	21	4h_MINCH_3_ctrlLPS	4h_ctrlLPS_pvalue	Sucrose Degradation V (Mammalian)
1517	0	NA	170	21	4h_MINCH_3_ctrlLPS	4h_ctrlLPS_pvalue	Sulfate Activation for Sulfonation
1518	0.709594339	-1	77	10	4h_MINCH_3_ctrlLPS	4h_ctrlLPS_pvalue	Sumoylation Pathway
1519	0.881467051	NA	218	19	4h_MINCH_3_ctrlLPS	4h_ctrlLPS_pvalue	Superoxide Radicals Degradation
1520	1.195181029	-1	100	17	4h_MINCH_3_ctrlLPS	4h_ctrlLPS_pvalue	Superpathway of Cholesterol Biosynthesis
1521	1.655708708	-1	220	17	4h_MINCH_3_ctrlLPS	4h_ctrlLPS_pvalue	Superpathway of Geranylgeranyldiphosphate Biosynthesis I (via Mevalonate)
1522	0.590612555	NA	197	21	4h_MINCH_3_ctrlLPS	4h_ctrlLPS_pvalue	Superpathway of Methionine Degradation
1523	0	NA	34	21	4h_MINCH_3_ctrlLPS	4h_ctrlLPS_pvalue	Superpathway of Serine and Glycine Biosynthesis I
1524	0	0	78	18	4h_MINCH_3_ctrlLPS	4h_ctrlLPS_pvalue	Synaptogenesis Signaling Pathway
1525	0.89859003	NA	79	15	4h_MINCH_3_ctrlLPS	4h_ctrlLPS_pvalue	TCA Cycle II (Eukaryotic)
1526	0.324457895	NA	47	11	4h_MINCH_3_ctrlLPS	4h_ctrlLPS_pvalue	Tec Kinase Signaling
1527	0.128638458	NA	91	7	4h_MINCH_3_ctrlLPS	4h_ctrlLPS_pvalue	Telomerase Signaling
1528	0.511949657	NA	184	21	4h_MINCH_3_ctrlLPS	4h_ctrlLPS_pvalue	Telomere Extension by Telomerase
1529	0.458200389	2	15	4	4h_MINCH_3_ctrlLPS	4h_ctrlLPS_pvalue	Th17 Activation Pathway
1530	0.195686613	NA	119	19	4h_MINCH_3_ctrlLPS	4h_ctrlLPS_pvalue	Thrombin Signaling
1531	0.355758271	NA	124	21	4h_MINCH_3_ctrlLPS	4h_ctrlLPS_pvalue	Tight Junction Signaling
1532	0.21951003	NA	135	21	4h_MINCH_3_ctrlLPS	4h_ctrlLPS_pvalue	Triacylglycerol Degradation
1533	1.957133688	1.633	55	21	4h_MINCH_3_ctrlLPS	4h_ctrlLPS_pvalue	tRNA Charging
1534	0.842431411	NA	212	17	4h_MINCH_3_ctrlLPS	4h_ctrlLPS_pvalue	Tryptophan Degradation III (Eukaryotic)
1535	0	NA	136	21	4h_MINCH_3_ctrlLPS	4h_ctrlLPS_pvalue	Tumoricidal Function of Hepatic Natural Killer Cells
1536	0.511949657	NA	141	21	4h_MINCH_3_ctrlLPS	4h_ctrlLPS_pvalue	UDP-D-xylose and UDP-D-glucuronate Biosynthesis
1537	0	NA	157	21	4h_MINCH_3_ctrlLPS	4h_ctrlLPS_pvalue	UDP-N-acetyl-D-galactosamine Biosynthesis I
1538	1.420805256	-2.449	14	3	4h_MINCH_3_ctrlLPS	4h_ctrlLPS_pvalue	Unfolded protein response
1539	0.138431639	NA	209	17	4h_MINCH_3_ctrlLPS	4h_ctrlLPS_pvalue	Valine Degradation I
1540	0.135862642	NA	63	19	4h_MINCH_3_ctrlLPS	4h_ctrlLPS_pvalue	VEGF Signaling
1541	0	NA	152	21	4h_MINCH_3_ctrlLPS	4h_ctrlLPS_pvalue	Virus Entry via Endocytic Pathways
1542	0.428673055	NA	155	21	4h_MINCH_3_ctrlLPS	4h_ctrlLPS_pvalue	Vitamin-C Transport
1543	1.489541854	1.134	70	11	4h_MINCH_3_ctrlLPS	4h_ctrlLPS_pvalue	Xenobiotic Metabolism AHR Signaling Pathway
1544	0.758069119	-0.707	115	17	4h_MINCH_3_ctrlLPS	4h_ctrlLPS_pvalue	Xenobiotic Metabolism CAR Signaling Pathway
1545	0.458200389	0.378	39	11	4h_MINCH_3_ctrlLPS	4h_ctrlLPS_pvalue	Xenobiotic Metabolism PXR Signaling Pathway
1546	0.504935243	NA	33	21	4h_MINCH_3_ctrlLPS	4h_ctrlLPS_pvalue	Xenobiotic Metabolism Signaling
1547	0	NA	186	21	4h_MINCH_3_ctrlLPS	4h_ctrlLPS_pvalue	Zymosterol Biosynthesis
1548	0.010911969	NA	221	18	4h_MINCH_4_ctrlLPS	4h_ctrlLPS_pvalue	?-Adrenergic Signaling
1549	0.478388454	NA	138	21	4h_MINCH_4_ctrlLPS	4h_ctrlLPS_pvalue	?-glutamyl Cycle
1550	0.072539406	-2	11	8	4h_MINCH_4_ctrlLPS	4h_ctrlLPS_pvalue	14-3-3-mediated Signaling
1551	0.217814153	NA	194	21	4h_MINCH_4_ctrlLPS	4h_ctrlLPS_pvalue	2-ketoglutarate Dehydrogenase Complex
1552	0.157755618	NA	130	21	4h_MINCH_4_ctrlLPS	4h_ctrlLPS_pvalue	Acetyl-CoA Biosynthesis I (Pyruvate Dehydrogenase Complex)
1553	0	NA	160	21	4h_MINCH_4_ctrlLPS	4h_ctrlLPS_pvalue	Acetyl-CoA Biosynthesis III (from Citrate)
1554	0.76877853	-1.732	2	3	4h_MINCH_4_ctrlLPS	4h_ctrlLPS_pvalue	Actin Cytoskeleton Signaling
1555	0.094500509	-1	114	15	4h_MINCH_4_ctrlLPS	4h_ctrlLPS_pvalue	Actin Nucleation by ARP-WASP Complex
1556	0	NA	154	21	4h_MINCH_4_ctrlLPS	4h_ctrlLPS_pvalue	Acyl Carrier Protein Metabolism
1557	0.497904331	NA	150	21	4h_MINCH_4_ctrlLPS	4h_ctrlLPS_pvalue	Adenine and Adenosine Salvage VI
1558	0.0560746	NA	28	21	4h_MINCH_4_ctrlLPS	4h_ctrlLPS_pvalue	Agranulocyte Adhesion and Diapedesis
1559	0.25523724	NA	147	21	4h_MINCH_4_ctrlLPS	4h_ctrlLPS_pvalue	Aldosterone Signaling in Epithelial Cells
1560	0.001752723	-0.378	60	16	4h_MINCH_4_ctrlLPS	4h_ctrlLPS_pvalue	AMPK Signaling
1561	0.497904331	NA	171	21	4h_MINCH_4_ctrlLPS	4h_ctrlLPS_pvalue	Amyloid Processing
1562	0.005874038	NA	199	18	4h_MINCH_4_ctrlLPS	4h_ctrlLPS_pvalue	Angiopoietin Signaling
1563	0.413109759	NA	32	21	4h_MINCH_4_ctrlLPS	4h_ctrlLPS_pvalue	Antigen Presentation Pathway
1564	0.002785827	NA	75	19	4h_MINCH_4_ctrlLPS	4h_ctrlLPS_pvalue	Antiproliferative Role of Somatostatin Receptor 2
1565	0	NA	116	22	4h_MINCH_4_ctrlLPS	4h_ctrlLPS_pvalue	Antiproliferative Role of TOB in T Cell Signaling
1566	0.188567809	-1.342	71	14	4h_MINCH_4_ctrlLPS	4h_ctrlLPS_pvalue	Apelin Adipocyte Signaling Pathway
1567	0	NA	69	12	4h_MINCH_4_ctrlLPS	4h_ctrlLPS_pvalue	Apelin Cardiomyocyte Signaling Pathway
1568	0.185705905	0	214	21	4h_MINCH_4_ctrlLPS	4h_ctrlLPS_pvalue	Apoptosis Signaling
1569	0	NA	131	21	4h_MINCH_4_ctrlLPS	4h_ctrlLPS_pvalue	Arginine Biosynthesis IV
1570	0.76877853	1.342	68	11	4h_MINCH_4_ctrlLPS	4h_ctrlLPS_pvalue	Aryl Hydrocarbon Receptor Signaling
1571	0.157755618	NA	140	21	4h_MINCH_4_ctrlLPS	4h_ctrlLPS_pvalue	Aspartate Degradation II
1572	0	NA	26	21	4h_MINCH_4_ctrlLPS	4h_ctrlLPS_pvalue	Axonal Guidance Signaling
1573	2.28799492	-1.414	9	6	4h_MINCH_4_ctrlLPS	4h_ctrlLPS_pvalue	BAG2 Signaling Pathway
1574	0.053838559	NA	190	21	4h_MINCH_4_ctrlLPS	4h_ctrlLPS_pvalue	BER pathway
1575	0.217814153	NA	151	21	4h_MINCH_4_ctrlLPS	4h_ctrlLPS_pvalue	Branched-chain ?-keto acid Dehydrogenase Complex
1576	0.157755618	NA	201	21	4h_MINCH_4_ctrlLPS	4h_ctrlLPS_pvalue	Calcium-induced T Lymphocyte Apoptosis
1577	0.013836418	NA	104	18	4h_MINCH_4_ctrlLPS	4h_ctrlLPS_pvalue	Calcium Signaling
1578	0.053838559	0	208	18	4h_MINCH_4_ctrlLPS	4h_ctrlLPS_pvalue	Cardiac ?-adrenergic Signaling
1579	0.0560746	-1	58	21	4h_MINCH_4_ctrlLPS	4h_ctrlLPS_pvalue	Cardiac Hypertrophy Signaling
1580	1.494088767	NA	188	21	4h_MINCH_4_ctrlLPS	4h_ctrlLPS_pvalue	Caveolar-mediated Endocytosis Signaling
1581	0	NA	18	21	4h_MINCH_4_ctrlLPS	4h_ctrlLPS_pvalue	CCR3 Signaling in Eosinophils
1582	0.010911969	-1	112	19	4h_MINCH_4_ctrlLPS	4h_ctrlLPS_pvalue	CD28 Signaling in T Helper Cells
1583	0	NA	17	21	4h_MINCH_4_ctrlLPS	4h_ctrlLPS_pvalue	CD40 Signaling
1584	0.0560746	-2	7	6	4h_MINCH_4_ctrlLPS	4h_ctrlLPS_pvalue	Cdc42 Signaling
1585	0	NA	204	20	4h_MINCH_4_ctrlLPS	4h_ctrlLPS_pvalue	Cell Cycle Control of Chromosomal Replication
1586	0	NA	31	21	4h_MINCH_4_ctrlLPS	4h_ctrlLPS_pvalue	Cell Cycle: G2/M DNA Damage Checkpoint Regulation
1587	0	NA	90	19	4h_MINCH_4_ctrlLPS	4h_ctrlLPS_pvalue	Ceramide Signaling
1588	0	NA	92	19	4h_MINCH_4_ctrlLPS	4h_ctrlLPS_pvalue	Chemokine Signaling
1589	0.25523724	NA	125	21	4h_MINCH_4_ctrlLPS	4h_ctrlLPS_pvalue	Chronic Myeloid Leukemia Signaling
1590	0.76877853	NA	16	21	4h_MINCH_4_ctrlLPS	4h_ctrlLPS_pvalue	Citrulline Biosynthesis
1591	1.652720592	NA	175	21	4h_MINCH_4_ctrlLPS	4h_ctrlLPS_pvalue	Clathrin-mediated Endocytosis Signaling
1592	0	0.816	94	16	4h_MINCH_4_ctrlLPS	4h_ctrlLPS_pvalue	Colorectal Cancer Metastasis Signaling
1593	8.01670149	3.8	1	1	4h_MINCH_4_ctrlLPS	4h_ctrlLPS_pvalue	Coronavirus Pathogenesis Pathway
1594	0	NA	158	21	4h_MINCH_4_ctrlLPS	4h_ctrlLPS_pvalue	Crosstalk between Dendritic Cells and Natural Killer Cells
1595	0.142591216	NA	127	21	4h_MINCH_4_ctrlLPS	4h_ctrlLPS_pvalue	CTLA4 Signaling in Cytotoxic T Lymphocytes
1596	0	-0.447	43	19	4h_MINCH_4_ctrlLPS	4h_ctrlLPS_pvalue	CXCR4 Signaling
1597	0.185705905	NA	22	21	4h_MINCH_4_ctrlLPS	4h_ctrlLPS_pvalue	Cysteine Biosynthesis III (mammalia)
1598	0	NA	23	21	4h_MINCH_4_ctrlLPS	4h_ctrlLPS_pvalue	Cytotoxic T Lymphocyte-mediated Apoptosis of Target Cells
1599	0.497904331	NA	183	21	4h_MINCH_4_ctrlLPS	4h_ctrlLPS_pvalue	D-mannose Degradation
1600	0.094500509	-0.447	110	21	4h_MINCH_4_ctrlLPS	4h_ctrlLPS_pvalue	Death Receptor Signaling
1601	0.746582195	NA	191	21	4h_MINCH_4_ctrlLPS	4h_ctrlLPS_pvalue	DNA Double-Strand Break Repair by Non-Homologous End Joining
1602	0	NA	177	21	4h_MINCH_4_ctrlLPS	4h_ctrlLPS_pvalue	Dopamine Degradation
1603	18.39664418	-3.128	4	2	4h_MINCH_4_ctrlLPS	4h_ctrlLPS_pvalue	EIF2 Signaling
1604	0	NA	198	21	4h_MINCH_4_ctrlLPS	4h_ctrlLPS_pvalue	Endoplasmic Reticulum Stress Pathway
1605	0.217814153	NA	217	17	4h_MINCH_4_ctrlLPS	4h_ctrlLPS_pvalue	Ephrin B Signaling
1606	0.0560746	-0.707	46	5	4h_MINCH_4_ctrlLPS	4h_ctrlLPS_pvalue	Ephrin Receptor Signaling
1607	0.217814153	NA	179	21	4h_MINCH_4_ctrlLPS	4h_ctrlLPS_pvalue	Epithelial Adherens Junction Signaling
1608	0.07400205	0.378	99	19	4h_MINCH_4_ctrlLPS	4h_ctrlLPS_pvalue	ERK/MAPK Signaling
1609	0.072539406	-1	83	15	4h_MINCH_4_ctrlLPS	4h_ctrlLPS_pvalue	ERK5 Signaling
1610	0.596595015	0	192	21	4h_MINCH_4_ctrlLPS	4h_ctrlLPS_pvalue	Estrogen Biosynthesis
1611	0.76877853	0	93	19	4h_MINCH_4_ctrlLPS	4h_ctrlLPS_pvalue	Estrogen Receptor Signaling
1612	0	NA	98	20	4h_MINCH_4_ctrlLPS	4h_ctrlLPS_pvalue	FAT10 Cancer Signaling Pathway
1613	1.147254304	NA	205	16	4h_MINCH_4_ctrlLPS	4h_ctrlLPS_pvalue	FAT10 Signaling Pathway
1614	2.514167239	-0.378	38	19	4h_MINCH_4_ctrlLPS	4h_ctrlLPS_pvalue	Fatty Acid ?-oxidation I
1615	0.072539406	-0.447	12	9	4h_MINCH_4_ctrlLPS	4h_ctrlLPS_pvalue	Fc? Receptor-mediated Phagocytosis in Macrophages and Monocytes
1616	0.188567809	-1.633	108	7	4h_MINCH_4_ctrlLPS	4h_ctrlLPS_pvalue	fMLP Signaling in Neutrophils
1617	0.181786908	NA	166	21	4h_MINCH_4_ctrlLPS	4h_ctrlLPS_pvalue	Folate Polyglutamylation
1618	0.478388454	NA	10	21	4h_MINCH_4_ctrlLPS	4h_ctrlLPS_pvalue	Folate Transformations I
1619	0.07400205	NA	128	21	4h_MINCH_4_ctrlLPS	4h_ctrlLPS_pvalue	G Protein Signaling Mediated by Tubby
1620	0	1	45	20	4h_MINCH_4_ctrlLPS	4h_ctrlLPS_pvalue	G?q Signaling
1621	0	NA	178	21	4h_MINCH_4_ctrlLPS	4h_ctrlLPS_pvalue	Germ Cell-Sertoli Cell Junction Signaling
1622	0.010911969	NA	101	18	4h_MINCH_4_ctrlLPS	4h_ctrlLPS_pvalue	Glioma Invasiveness Signaling
1623	0	NA	172	21	4h_MINCH_4_ctrlLPS	4h_ctrlLPS_pvalue	Glucocorticoid Receptor Signaling
1624	0.913077765	0	102	13	4h_MINCH_4_ctrlLPS	4h_ctrlLPS_pvalue	Gluconeogenesis I
1625	0	NA	118	21	4h_MINCH_4_ctrlLPS	4h_ctrlLPS_pvalue	Glutamate Receptor Signaling
1626	0	NA	62	21	4h_MINCH_4_ctrlLPS	4h_ctrlLPS_pvalue	Glutamate Removal from Folates
1627	0.497904331	NA	169	21	4h_MINCH_4_ctrlLPS	4h_ctrlLPS_pvalue	Glutamine Degradation I
1628	1.978380748	-0.447	215	17	4h_MINCH_4_ctrlLPS	4h_ctrlLPS_pvalue	Glutaryl-CoA Degradation
1629	0.966924679	-1	207	21	4h_MINCH_4_ctrlLPS	4h_ctrlLPS_pvalue	Glutathione-mediated Detoxification
1630	0.25523724	NA	126	21	4h_MINCH_4_ctrlLPS	4h_ctrlLPS_pvalue	Glutathione Biosynthesis
1631	0.185705905	NA	195	21	4h_MINCH_4_ctrlLPS	4h_ctrlLPS_pvalue	Glutathione Redox Reactions I
1632	0	NA	27	21	4h_MINCH_4_ctrlLPS	4h_ctrlLPS_pvalue	Glutathione Redox Reactions II
1633	0.157755618	NA	193	21	4h_MINCH_4_ctrlLPS	4h_ctrlLPS_pvalue	Glycine Cleavage Complex
1634	0.350992644	NA	167	21	4h_MINCH_4_ctrlLPS	4h_ctrlLPS_pvalue	Glycine Degradation (Creatine Biosynthesis)
1635	0.157755618	NA	148	21	4h_MINCH_4_ctrlLPS	4h_ctrlLPS_pvalue	Glycogen Biosynthesis II (from UDP-D-Glucose)
1636	1.514770753	-0.447	56	13	4h_MINCH_4_ctrlLPS	4h_ctrlLPS_pvalue	Glycolysis I
1637	0	NA	40	18	4h_MINCH_4_ctrlLPS	4h_ctrlLPS_pvalue	GM-CSF Signaling
1638	0.68140599	NA	153	21	4h_MINCH_4_ctrlLPS	4h_ctrlLPS_pvalue	Granzyme A Signaling
1639	0.221748539	NA	139	21	4h_MINCH_4_ctrlLPS	4h_ctrlLPS_pvalue	Granzyme B Signaling
1640	0.089286334	NA	196	21	4h_MINCH_4_ctrlLPS	4h_ctrlLPS_pvalue	Heme Biosynthesis II
1641	0.341570355	-0.577	85	19	4h_MINCH_4_ctrlLPS	4h_ctrlLPS_pvalue	HIF1? Signaling
1642	0	NA	52	20	4h_MINCH_4_ctrlLPS	4h_ctrlLPS_pvalue	HIPPO signaling
1643	1.157631457	0.816	107	11	4h_MINCH_4_ctrlLPS	4h_ctrlLPS_pvalue	Huntington's Disease Signaling
1644	1.355744418	NA	159	21	4h_MINCH_4_ctrlLPS	4h_ctrlLPS_pvalue	Hypoxia Signaling in the Cardiovascular System
1645	0.25523724	0.447	64	18	4h_MINCH_4_ctrlLPS	4h_ctrlLPS_pvalue	IGF-1 Signaling
1646	0.005874038	NA	176	21	4h_MINCH_4_ctrlLPS	4h_ctrlLPS_pvalue	IL-10 Signaling
1647	0	NA	117	20	4h_MINCH_4_ctrlLPS	4h_ctrlLPS_pvalue	IL-15 Signaling
1648	0	NA	213	20	4h_MINCH_4_ctrlLPS	4h_ctrlLPS_pvalue	IL-17A Signaling in Airway Cells
1649	0.107884401	NA	49	20	4h_MINCH_4_ctrlLPS	4h_ctrlLPS_pvalue	IL-23 Signaling Pathway
1650	0	NA	72	20	4h_MINCH_4_ctrlLPS	4h_ctrlLPS_pvalue	IL-3 Signaling
1651	0.067942262	-1.414	5	5	4h_MINCH_4_ctrlLPS	4h_ctrlLPS_pvalue	IL-8 Signaling
1652	0.596595015	-0.905	96	7	4h_MINCH_4_ctrlLPS	4h_ctrlLPS_pvalue	ILK Signaling
1653	0.038560219	NA	35	19	4h_MINCH_4_ctrlLPS	4h_ctrlLPS_pvalue	Induction of Apoptosis by HIV1
1654	0.482685625	NA	134	21	4h_MINCH_4_ctrlLPS	4h_ctrlLPS_pvalue	Inflammasome pathway
1655	0.992813196	-0.302	89	12	4h_MINCH_4_ctrlLPS	4h_ctrlLPS_pvalue	Inhibition of ARE-Mediated mRNA Degradation Pathway
1656	0.107884401	NA	30	21	4h_MINCH_4_ctrlLPS	4h_ctrlLPS_pvalue	iNOS Signaling
1657	0.61349053	0.535	84	12	4h_MINCH_4_ctrlLPS	4h_ctrlLPS_pvalue	Insulin Secretion Signaling Pathway
1658	0.497904331	-0.277	105	15	4h_MINCH_4_ctrlLPS	4h_ctrlLPS_pvalue	Integrin Signaling
1659	0.191999694	NA	203	20	4h_MINCH_4_ctrlLPS	4h_ctrlLPS_pvalue	Interferon Signaling
1660	0.25523724	NA	143	21	4h_MINCH_4_ctrlLPS	4h_ctrlLPS_pvalue	Iron homeostasis signaling pathway
1661	4.041046304	-1.633	74	17	4h_MINCH_4_ctrlLPS	4h_ctrlLPS_pvalue	Isoleucine Degradation I
1662	0.053838559	0	95	20	4h_MINCH_4_ctrlLPS	4h_ctrlLPS_pvalue	JAK/Stat Signaling
1663	1.667023584	-1	202	21	4h_MINCH_4_ctrlLPS	4h_ctrlLPS_pvalue	Ketogenesis
1664	1.208810372	NA	180	21	4h_MINCH_4_ctrlLPS	4h_ctrlLPS_pvalue	Ketolysis
1665	0.913077765	NA	182	21	4h_MINCH_4_ctrlLPS	4h_ctrlLPS_pvalue	Lactose Degradation III
1666	0.478388454	NA	163	21	4h_MINCH_4_ctrlLPS	4h_ctrlLPS_pvalue	Leucine Degradation I
1667	0.072539406	0	57	5	4h_MINCH_4_ctrlLPS	4h_ctrlLPS_pvalue	Leukocyte Extravasation Signaling
1668	0.807348909	NA	41	21	4h_MINCH_4_ctrlLPS	4h_ctrlLPS_pvalue	Lipid Antigen Presentation by CD1
1669	0.0560746	NA	67	22	4h_MINCH_4_ctrlLPS	4h_ctrlLPS_pvalue	LXR/RXR Activation
1670	1.09319213	NA	19	21	4h_MINCH_4_ctrlLPS	4h_ctrlLPS_pvalue	Mechanisms of Viral Exit from Host Cells
1671	0.217814153	NA	129	21	4h_MINCH_4_ctrlLPS	4h_ctrlLPS_pvalue	Methionine Degradation I (to Homocysteine)
1672	0	NA	162	21	4h_MINCH_4_ctrlLPS	4h_ctrlLPS_pvalue	Methylthiopropionate Biosynthesis
1673	0.776292617	NA	111	17	4h_MINCH_4_ctrlLPS	4h_ctrlLPS_pvalue	Mevalonate Pathway I
1674	4.113945263	NA	168	21	4h_MINCH_4_ctrlLPS	4h_ctrlLPS_pvalue	Mitochondrial Dysfunction
1675	0.157755618	NA	25	21	4h_MINCH_4_ctrlLPS	4h_ctrlLPS_pvalue	Mitotic Roles of Polo-Like Kinase
1676	4.278642252	-1	50	18	4h_MINCH_4_ctrlLPS	4h_ctrlLPS_pvalue	mTOR Signaling
1677	0	-0.378	97	17	4h_MINCH_4_ctrlLPS	4h_ctrlLPS_pvalue	Natural Killer Cell Signaling
1678	0.807348909	-1.732	29	10	4h_MINCH_4_ctrlLPS	4h_ctrlLPS_pvalue	Necroptosis Signaling Pathway
1679	0.072539406	NA	109	18	4h_MINCH_4_ctrlLPS	4h_ctrlLPS_pvalue	Neuregulin Signaling
1680	0	NA	210	16	4h_MINCH_4_ctrlLPS	4h_ctrlLPS_pvalue	Neuroprotective Role of THOP1 in Alzheimer's Disease
1681	1.652720592	-1.414	6	3	4h_MINCH_4_ctrlLPS	4h_ctrlLPS_pvalue	NRF2-mediated Oxidative Stress Response
1682	0.053838559	NA	161	21	4h_MINCH_4_ctrlLPS	4h_ctrlLPS_pvalue	Nucleotide Excision Repair Pathway
1683	3.391985305	-0.775	81	5	4h_MINCH_4_ctrlLPS	4h_ctrlLPS_pvalue	Oxidative Phosphorylation
1684	0.001752723	0	80	20	4h_MINCH_4_ctrlLPS	4h_ctrlLPS_pvalue	P2Y Purigenic Receptor Signaling Pathway
1685	0.004553949	NA	53	12	4h_MINCH_4_ctrlLPS	4h_ctrlLPS_pvalue	p70S6K Signaling
1686	0	NA	200	21	4h_MINCH_4_ctrlLPS	4h_ctrlLPS_pvalue	Pancreatic Adenocarcinoma Signaling
1687	0	NA	123	21	4h_MINCH_4_ctrlLPS	4h_ctrlLPS_pvalue	Parkinson's Signaling
1688	0.478388454	-0.447	66	13	4h_MINCH_4_ctrlLPS	4h_ctrlLPS_pvalue	Paxillin Signaling
1689	0.478388454	1.134	88	20	4h_MINCH_4_ctrlLPS	4h_ctrlLPS_pvalue	PDGF Signaling
1690	0.0560746	NA	219	17	4h_MINCH_4_ctrlLPS	4h_ctrlLPS_pvalue	Pentose Phosphate Pathway
1691	0.157755618	NA	181	21	4h_MINCH_4_ctrlLPS	4h_ctrlLPS_pvalue	Pentose Phosphate Pathway (Non-oxidative Branch)
1692	0	NA	189	21	4h_MINCH_4_ctrlLPS	4h_ctrlLPS_pvalue	Pentose Phosphate Pathway (Oxidative Branch)
1693	0	NA	149	21	4h_MINCH_4_ctrlLPS	4h_ctrlLPS_pvalue	PFKFB4 Signaling Pathway
1694	3.553625301	NA	174	21	4h_MINCH_4_ctrlLPS	4h_ctrlLPS_pvalue	Phagosome Maturation
1695	0	NA	132	21	4h_MINCH_4_ctrlLPS	4h_ctrlLPS_pvalue	Phenylalanine Degradation IV (Mammalian, via Side Chain)
1696	0	NA	146	21	4h_MINCH_4_ctrlLPS	4h_ctrlLPS_pvalue	Phenylethylamine Degradation I
1697	0.146401202	-1.667	13	7	4h_MINCH_4_ctrlLPS	4h_ctrlLPS_pvalue	PI3K/AKT Signaling
1698	0.482685625	NA	8	21	4h_MINCH_4_ctrlLPS	4h_ctrlLPS_pvalue	Polyamine Regulation in Colon Cancer
1699	0.0560746	0.447	48	11	4h_MINCH_4_ctrlLPS	4h_ctrlLPS_pvalue	PPAR Signaling
1700	0.0560746	1.134	54	20	4h_MINCH_4_ctrlLPS	4h_ctrlLPS_pvalue	PPAR?/RXR? Activation
1701	0	0.447	61	20	4h_MINCH_4_ctrlLPS	4h_ctrlLPS_pvalue	Production of Nitric Oxide and Reactive Oxygen Species in Macrophages
1702	0.217814153	NA	185	21	4h_MINCH_4_ctrlLPS	4h_ctrlLPS_pvalue	Prostate Cancer Signaling
1703	0	-0.333	44	19	4h_MINCH_4_ctrlLPS	4h_ctrlLPS_pvalue	Protein Kinase A Signaling
1704	3.336386573	NA	137	21	4h_MINCH_4_ctrlLPS	4h_ctrlLPS_pvalue	Protein Ubiquitination Pathway
1705	0.367076929	NA	120	21	4h_MINCH_4_ctrlLPS	4h_ctrlLPS_pvalue	Purine Nucleotides De Novo Biosynthesis II
1706	0.217814153	NA	142	21	4h_MINCH_4_ctrlLPS	4h_ctrlLPS_pvalue	Pyruvate Fermentation to Lactate
1707	0.217814153	-0.378	21	5	4h_MINCH_4_ctrlLPS	4h_ctrlLPS_pvalue	Rac Signaling
1708	0.221748539	NA	156	21	4h_MINCH_4_ctrlLPS	4h_ctrlLPS_pvalue	RAN Signaling
1709	0.181786908	NA	122	21	4h_MINCH_4_ctrlLPS	4h_ctrlLPS_pvalue	RAR Activation
1710	0.157755618	0.378	82	19	4h_MINCH_4_ctrlLPS	4h_ctrlLPS_pvalue	Reelin Signaling in Neurons
1711	0.350992644	-0.816	86	5	4h_MINCH_4_ctrlLPS	4h_ctrlLPS_pvalue	Regulation of Actin-based Motility by Rho
1712	0	NA	165	21	4h_MINCH_4_ctrlLPS	4h_ctrlLPS_pvalue	Regulation of Cellular Mechanics by Calpain Protease
1713	7.029955944	NA	76	19	4h_MINCH_4_ctrlLPS	4h_ctrlLPS_pvalue	Regulation of eIF4 and p70S6K Signaling
1714	0	0	103	20	4h_MINCH_4_ctrlLPS	4h_ctrlLPS_pvalue	Regulation Of The Epithelial Mesenchymal Transition By Growth Factors Pathway
1715	0	NA	106	18	4h_MINCH_4_ctrlLPS	4h_ctrlLPS_pvalue	Relaxin Signaling
1716	0.509572699	NA	87	15	4h_MINCH_4_ctrlLPS	4h_ctrlLPS_pvalue	Remodeling of Epithelial Adherens Junctions
1717	0.0560746	NA	211	18	4h_MINCH_4_ctrlLPS	4h_ctrlLPS_pvalue	Renal Cell Carcinoma Signaling
1718	0.226980305	-1.89	3	3	4h_MINCH_4_ctrlLPS	4h_ctrlLPS_pvalue	RhoA Signaling
1719	0.217814153	1.134	65	4	4h_MINCH_4_ctrlLPS	4h_ctrlLPS_pvalue	RhoGDI Signaling
1720	0.053838559	NA	187	21	4h_MINCH_4_ctrlLPS	4h_ctrlLPS_pvalue	Role of IL-17A in Psoriasis
1721	0.010911969	NA	173	21	4h_MINCH_4_ctrlLPS	4h_ctrlLPS_pvalue	Role of IL-17F in Allergic Inflammatory Airway Diseases
1722	0.395899252	NA	121	21	4h_MINCH_4_ctrlLPS	4h_ctrlLPS_pvalue	Role of JAK1, JAK2 and TYK2 in Interferon Signaling
1723	0	0	73	18	4h_MINCH_4_ctrlLPS	4h_ctrlLPS_pvalue	Role of NFAT in Cardiac Hypertrophy
1724	0.0560746	NA	216	19	4h_MINCH_4_ctrlLPS	4h_ctrlLPS_pvalue	Role of PI3K/AKT Signaling in the Pathogenesis of Influenza
1725	1.09319213	1.508	36	4	4h_MINCH_4_ctrlLPS	4h_ctrlLPS_pvalue	Role of PKR in Interferon Induction and Antiviral Response
1726	0.217814153	NA	164	21	4h_MINCH_4_ctrlLPS	4h_ctrlLPS_pvalue	Role of Tissue Factor in Cancer
1727	0.350992644	NA	144	21	4h_MINCH_4_ctrlLPS	4h_ctrlLPS_pvalue	S-adenosyl-L-methionine Biosynthesis
1728	0.0560746	-0.447	59	21	4h_MINCH_4_ctrlLPS	4h_ctrlLPS_pvalue	SAPK/JNK Signaling
1729	0.157755618	NA	24	21	4h_MINCH_4_ctrlLPS	4h_ctrlLPS_pvalue	Selenocysteine Biosynthesis II (Archaea and Eukaryotes)
1730	0	NA	20	21	4h_MINCH_4_ctrlLPS	4h_ctrlLPS_pvalue	Semaphorin Signaling in Neurons
1731	0.913077765	NA	133	21	4h_MINCH_4_ctrlLPS	4h_ctrlLPS_pvalue	Serine Biosynthesis
1732	0.482685625	-0.577	42	5	4h_MINCH_4_ctrlLPS	4h_ctrlLPS_pvalue	Signaling by Rho Family GTPases
1733	4.998636831	-1.528	113	10	4h_MINCH_4_ctrlLPS	4h_ctrlLPS_pvalue	Sirtuin Signaling Pathway
1734	0	NA	145	21	4h_MINCH_4_ctrlLPS	4h_ctrlLPS_pvalue	Sorbitol Degradation I
1735	0	NA	206	18	4h_MINCH_4_ctrlLPS	4h_ctrlLPS_pvalue	SPINK1 Pancreatic Cancer Pathway
1736	0.089286334	NA	51	15	4h_MINCH_4_ctrlLPS	4h_ctrlLPS_pvalue	Spliceosomal Cycle
1737	0.497904331	NA	37	21	4h_MINCH_4_ctrlLPS	4h_ctrlLPS_pvalue	Sucrose Degradation V (Mammalian)
1738	0	NA	170	21	4h_MINCH_4_ctrlLPS	4h_ctrlLPS_pvalue	Sulfate Activation for Sulfonation
1739	0.76877853	-1.633	77	10	4h_MINCH_4_ctrlLPS	4h_ctrlLPS_pvalue	Sumoylation Pathway
1740	1.208810372	NA	218	19	4h_MINCH_4_ctrlLPS	4h_ctrlLPS_pvalue	Superoxide Radicals Degradation
1741	0.621713733	-2	100	17	4h_MINCH_4_ctrlLPS	4h_ctrlLPS_pvalue	Superpathway of Cholesterol Biosynthesis
1742	0.58469698	NA	220	17	4h_MINCH_4_ctrlLPS	4h_ctrlLPS_pvalue	Superpathway of Geranylgeranyldiphosphate Biosynthesis I (via Mevalonate)
1743	0.228965809	NA	197	21	4h_MINCH_4_ctrlLPS	4h_ctrlLPS_pvalue	Superpathway of Methionine Degradation
1744	1.514770753	NA	34	21	4h_MINCH_4_ctrlLPS	4h_ctrlLPS_pvalue	Superpathway of Serine and Glycine Biosynthesis I
1745	0.185705905	1.069	78	18	4h_MINCH_4_ctrlLPS	4h_ctrlLPS_pvalue	Synaptogenesis Signaling Pathway
1746	0.471206737	NA	79	15	4h_MINCH_4_ctrlLPS	4h_ctrlLPS_pvalue	TCA Cycle II (Eukaryotic)
1747	0.109269183	0.816	47	11	4h_MINCH_4_ctrlLPS	4h_ctrlLPS_pvalue	Tec Kinase Signaling
1748	0.053838559	-2	91	7	4h_MINCH_4_ctrlLPS	4h_ctrlLPS_pvalue	Telomerase Signaling
1749	0.68140599	NA	184	21	4h_MINCH_4_ctrlLPS	4h_ctrlLPS_pvalue	Telomere Extension by Telomerase
1750	0.251961821	2.236	15	4	4h_MINCH_4_ctrlLPS	4h_ctrlLPS_pvalue	Th17 Activation Pathway
1751	0	NA	119	19	4h_MINCH_4_ctrlLPS	4h_ctrlLPS_pvalue	Thrombin Signaling
1752	0.621885611	NA	124	21	4h_MINCH_4_ctrlLPS	4h_ctrlLPS_pvalue	Tight Junction Signaling
1753	0	NA	135	21	4h_MINCH_4_ctrlLPS	4h_ctrlLPS_pvalue	Triacylglycerol Degradation
1754	1.157631457	0	55	21	4h_MINCH_4_ctrlLPS	4h_ctrlLPS_pvalue	tRNA Charging
1755	2.077843838	0	212	17	4h_MINCH_4_ctrlLPS	4h_ctrlLPS_pvalue	Tryptophan Degradation III (Eukaryotic)
1756	0	NA	136	21	4h_MINCH_4_ctrlLPS	4h_ctrlLPS_pvalue	Tumoricidal Function of Hepatic Natural Killer Cells
1757	0	NA	141	21	4h_MINCH_4_ctrlLPS	4h_ctrlLPS_pvalue	UDP-D-xylose and UDP-D-glucuronate Biosynthesis
1758	0.497904331	NA	157	21	4h_MINCH_4_ctrlLPS	4h_ctrlLPS_pvalue	UDP-N-acetyl-D-galactosamine Biosynthesis I
1759	0.367076929	-2.236	14	3	4h_MINCH_4_ctrlLPS	4h_ctrlLPS_pvalue	Unfolded protein response
1760	1.015645718	NA	209	17	4h_MINCH_4_ctrlLPS	4h_ctrlLPS_pvalue	Valine Degradation I
1761	0.185705905	NA	63	19	4h_MINCH_4_ctrlLPS	4h_ctrlLPS_pvalue	VEGF Signaling
1762	1.015645718	NA	152	21	4h_MINCH_4_ctrlLPS	4h_ctrlLPS_pvalue	Virus Entry via Endocytic Pathways
1763	0.482685625	NA	155	21	4h_MINCH_4_ctrlLPS	4h_ctrlLPS_pvalue	Vitamin-C Transport
1764	1.379105649	0.333	70	11	4h_MINCH_4_ctrlLPS	4h_ctrlLPS_pvalue	Xenobiotic Metabolism AHR Signaling Pathway
1765	0.142591216	-1.414	115	17	4h_MINCH_4_ctrlLPS	4h_ctrlLPS_pvalue	Xenobiotic Metabolism CAR Signaling Pathway
1766	0.107884401	0	39	11	4h_MINCH_4_ctrlLPS	4h_ctrlLPS_pvalue	Xenobiotic Metabolism PXR Signaling Pathway
1767	0.111143684	NA	33	21	4h_MINCH_4_ctrlLPS	4h_ctrlLPS_pvalue	Xenobiotic Metabolism Signaling
1768	0.157755618	NA	186	21	4h_MINCH_4_ctrlLPS	4h_ctrlLPS_pvalue	Zymosterol Biosynthesis
1769	1.057214553	-1.633	165	17	16h_DINCH_1_ctrlLPS	16h_ctrlLPS_pvalue	?-Adrenergic Signaling
1770	0	NA	279	2	16h_DINCH_1_ctrlLPS	16h_ctrlLPS_pvalue	?-glutamyl Cycle
1771	1.527087488	1.414	88	1	16h_DINCH_1_ctrlLPS	16h_ctrlLPS_pvalue	14-3-3-mediated Signaling
1772	0	NA	107	2	16h_DINCH_1_ctrlLPS	16h_ctrlLPS_pvalue	2-oxobutanoate Degradation I
1773	0.336420287	NA	154	2	16h_DINCH_1_ctrlLPS	16h_ctrlLPS_pvalue	4-1BB Signaling in T Lymphocytes
1774	0	NA	132	2	16h_DINCH_1_ctrlLPS	16h_ctrlLPS_pvalue	5-aminoimidazole Ribonucleotide Biosynthesis I
1775	0.477169562	NA	245	2	16h_DINCH_1_ctrlLPS	16h_ctrlLPS_pvalue	Acetyl-CoA Biosynthesis I (Pyruvate Dehydrogenase Complex)
1776	0.833726523	NA	295	2	16h_DINCH_1_ctrlLPS	16h_ctrlLPS_pvalue	Acetyl-CoA Biosynthesis III (from Citrate)
1777	3.636717172	-1.414	310	3	16h_DINCH_1_ctrlLPS	16h_ctrlLPS_pvalue	Actin Cytoskeleton Signaling
1778	0.857492987	-2.449	131	4	16h_DINCH_1_ctrlLPS	16h_ctrlLPS_pvalue	Actin Nucleation by ARP-WASP Complex
1779	0	NA	157	5	16h_DINCH_1_ctrlLPS	16h_ctrlLPS_pvalue	Activation of IRF by Cytosolic Pattern Recognition Receptors
1780	0.29723284	1	204	6	16h_DINCH_1_ctrlLPS	16h_ctrlLPS_pvalue	Acute Myeloid Leukemia Signaling
1781	0.612324123	2.121	181	7	16h_DINCH_1_ctrlLPS	16h_ctrlLPS_pvalue	Acute Phase Response Signaling
1782	0	NA	336	2	16h_DINCH_1_ctrlLPS	16h_ctrlLPS_pvalue	Acyl Carrier Protein Metabolism
1783	0	NA	166	2	16h_DINCH_1_ctrlLPS	16h_ctrlLPS_pvalue	Adenine and Adenosine Salvage VI
1784	0.736201129	1.265	160	6	16h_DINCH_1_ctrlLPS	16h_ctrlLPS_pvalue	Adrenomedullin signaling pathway
1785	0.679721987	NA	74	2	16h_DINCH_1_ctrlLPS	16h_ctrlLPS_pvalue	Agranulocyte Adhesion and Diapedesis
1786	0.406628593	1	294	8	16h_DINCH_1_ctrlLPS	16h_ctrlLPS_pvalue	Agrin Interactions at Neuromuscular Junction
1787	0	NA	126	2	16h_DINCH_1_ctrlLPS	16h_ctrlLPS_pvalue	Alanine Biosynthesis III
1788	1.921112818	-0.333	177	6	16h_DINCH_1_ctrlLPS	16h_ctrlLPS_pvalue	Aldosterone Signaling in Epithelial Cells
1789	1.289303508	-0.277	69	9	16h_DINCH_1_ctrlLPS	16h_ctrlLPS_pvalue	AMPK Signaling
1790	0.897310378	-1	92	2	16h_DINCH_1_ctrlLPS	16h_ctrlLPS_pvalue	Amyloid Processing
1791	0.821822112	0.378	206	6	16h_DINCH_1_ctrlLPS	16h_ctrlLPS_pvalue	Amyotrophic Lateral Sclerosis Signaling
1792	0.857492987	0	304	10	16h_DINCH_1_ctrlLPS	16h_ctrlLPS_pvalue	Androgen Signaling
1793	0	NA	345	11	16h_DINCH_1_ctrlLPS	16h_ctrlLPS_pvalue	Angiopoietin Signaling
1794	1.169741123	NA	9	2	16h_DINCH_1_ctrlLPS	16h_ctrlLPS_pvalue	Antigen Presentation Pathway
1795	0	NA	152	12	16h_DINCH_1_ctrlLPS	16h_ctrlLPS_pvalue	Antioxidant Action of Vitamin C
1796	0.821822112	0.816	123	6	16h_DINCH_1_ctrlLPS	16h_ctrlLPS_pvalue	Antiproliferative Role of Somatostatin Receptor 2
1797	0.381254779	0	351	13	16h_DINCH_1_ctrlLPS	16h_ctrlLPS_pvalue	Apelin Adipocyte Signaling Pathway
1798	1.442530492	1	202	12	16h_DINCH_1_ctrlLPS	16h_ctrlLPS_pvalue	Apelin Cardiomyocyte Signaling Pathway
1799	0.477169562	NA	207	6	16h_DINCH_1_ctrlLPS	16h_ctrlLPS_pvalue	Apelin Pancreas Signaling Pathway
1800	2.404679185	-0.302	94	14	16h_DINCH_1_ctrlLPS	16h_ctrlLPS_pvalue	Apoptosis Signaling
1801	0.518467525	NA	108	2	16h_DINCH_1_ctrlLPS	16h_ctrlLPS_pvalue	Arginine Biosynthesis IV
1802	1.001889458	1.414	47	15	16h_DINCH_1_ctrlLPS	16h_ctrlLPS_pvalue	Aryl Hydrocarbon Receptor Signaling
1803	0	NA	287	2	16h_DINCH_1_ctrlLPS	16h_ctrlLPS_pvalue	Aspartate Biosynthesis
1804	0	NA	87	2	16h_DINCH_1_ctrlLPS	16h_ctrlLPS_pvalue	Aspartate Degradation II
1805	0.334751189	NA	19	2	16h_DINCH_1_ctrlLPS	16h_ctrlLPS_pvalue	Assembly of RNA Polymerase I Complex
1806	0.782592336	NA	167	2	16h_DINCH_1_ctrlLPS	16h_ctrlLPS_pvalue	ATM Signaling
1807	1.169741123	NA	314	2	16h_DINCH_1_ctrlLPS	16h_ctrlLPS_pvalue	Autophagy
1808	1.226511785	NA	54	2	16h_DINCH_1_ctrlLPS	16h_ctrlLPS_pvalue	Axonal Guidance Signaling
1809	0	NA	55	2	16h_DINCH_1_ctrlLPS	16h_ctrlLPS_pvalue	B Cell Activating Factor Signaling
1810	0.344157374	0.707	115	2	16h_DINCH_1_ctrlLPS	16h_ctrlLPS_pvalue	B Cell Receptor Signaling
1811	0.770901919	-2	288	16	16h_DINCH_1_ctrlLPS	16h_ctrlLPS_pvalue	BAG2 Signaling Pathway
1812	0.693410812	NA	57	2	16h_DINCH_1_ctrlLPS	16h_ctrlLPS_pvalue	BER pathway
1813	0.195175131	NA	276	6	16h_DINCH_1_ctrlLPS	16h_ctrlLPS_pvalue	BMP signaling pathway
1814	1.303202718	-1.633	45	17	16h_DINCH_1_ctrlLPS	16h_ctrlLPS_pvalue	Calcium-induced T Lymphocyte Apoptosis
1815	0.691774564	0.447	355	12	16h_DINCH_1_ctrlLPS	16h_ctrlLPS_pvalue	Calcium Signaling
1816	0.364002577	NA	151	2	16h_DINCH_1_ctrlLPS	16h_ctrlLPS_pvalue	Cancer Drug Resistance By Drug Efflux
1817	1.165290124	1.069	58	18	16h_DINCH_1_ctrlLPS	16h_ctrlLPS_pvalue	Cardiac Hypertrophy Signaling
1818	1.527087488	NA	59	2	16h_DINCH_1_ctrlLPS	16h_ctrlLPS_pvalue	Caveolar-mediated Endocytosis Signaling
1819	0.973462166	0.447	187	11	16h_DINCH_1_ctrlLPS	16h_ctrlLPS_pvalue	CCR3 Signaling in Eosinophils
1820	0.176439298	NA	237	6	16h_DINCH_1_ctrlLPS	16h_ctrlLPS_pvalue	CD27 Signaling in Lymphocytes
1821	1.527087488	-1.265	232	19	16h_DINCH_1_ctrlLPS	16h_ctrlLPS_pvalue	CD28 Signaling in T Helper Cells
1822	0.668236158	1.342	90	7	16h_DINCH_1_ctrlLPS	16h_ctrlLPS_pvalue	CD40 Signaling
1823	1.759913133	-1.667	221	4	16h_DINCH_1_ctrlLPS	16h_ctrlLPS_pvalue	Cdc42 Signaling
1824	0.691774564	-0.816	240	9	16h_DINCH_1_ctrlLPS	16h_ctrlLPS_pvalue	CDK5 Signaling
1825	0.402274621	NA	3	9	16h_DINCH_1_ctrlLPS	16h_ctrlLPS_pvalue	Cell Cycle: G2/M DNA Damage Checkpoint Regulation
1826	0.569510056	NA	39	2	16h_DINCH_1_ctrlLPS	16h_ctrlLPS_pvalue	Cellular Effects of Sildenafil (Viagra)
1827	0.483450444	-1	319	20	16h_DINCH_1_ctrlLPS	16h_ctrlLPS_pvalue	Ceramide Signaling
1828	0.58879945	-1.342	20	17	16h_DINCH_1_ctrlLPS	16h_ctrlLPS_pvalue	Chemokine Signaling
1829	1.602798415	-1.508	306	17	16h_DINCH_1_ctrlLPS	16h_ctrlLPS_pvalue	Cholecystokinin/Gastrin-mediated Signaling
1830	0.679721987	NA	223	2	16h_DINCH_1_ctrlLPS	16h_ctrlLPS_pvalue	Cholesterol Biosynthesis I
1831	0.679721987	NA	144	2	16h_DINCH_1_ctrlLPS	16h_ctrlLPS_pvalue	Cholesterol Biosynthesis II (via 24,25-dihydrolanosterol)
1832	0.679721987	NA	145	2	16h_DINCH_1_ctrlLPS	16h_ctrlLPS_pvalue	Cholesterol Biosynthesis III (via Desmosterol)
1833	0.688113819	NA	330	2	16h_DINCH_1_ctrlLPS	16h_ctrlLPS_pvalue	Chronic Myeloid Leukemia Signaling
1834	0	NA	250	2	16h_DINCH_1_ctrlLPS	16h_ctrlLPS_pvalue	Citrulline-Nitric Oxide Cycle
1835	0	NA	184	2	16h_DINCH_1_ctrlLPS	16h_ctrlLPS_pvalue	Citrulline Biosynthesis
1836	2.199577265	NA	75	2	16h_DINCH_1_ctrlLPS	16h_ctrlLPS_pvalue	Clathrin-mediated Endocytosis Signaling
1837	0.317647662	NA	356	2	16h_DINCH_1_ctrlLPS	16h_ctrlLPS_pvalue	Cleavage and Polyadenylation of Pre-mRNA
1838	1.120597744	NA	354	2	16h_DINCH_1_ctrlLPS	16h_ctrlLPS_pvalue	CMP-N-acetylneuraminate Biosynthesis I (Eukaryotes)
1839	0.575730701	1	353	5	16h_DINCH_1_ctrlLPS	16h_ctrlLPS_pvalue	CNTF Signaling
1840	0.278108398	NA	347	2	16h_DINCH_1_ctrlLPS	16h_ctrlLPS_pvalue	Colanic Acid Building Blocks Biosynthesis
1841	0.438417865	-0.302	346	21	16h_DINCH_1_ctrlLPS	16h_ctrlLPS_pvalue	Colorectal Cancer Metastasis Signaling
1842	0.696541708	1.414	344	22	16h_DINCH_1_ctrlLPS	16h_ctrlLPS_pvalue	Coronavirus Pathogenesis Pathway
1843	0.575730701	NA	341	2	16h_DINCH_1_ctrlLPS	16h_ctrlLPS_pvalue	Creatine-phosphate Biosynthesis
1844	0.833000014	0.707	339	5	16h_DINCH_1_ctrlLPS	16h_ctrlLPS_pvalue	CREB Signaling in Neurons
1845	0	NA	338	2	16h_DINCH_1_ctrlLPS	16h_ctrlLPS_pvalue	Crosstalk between Dendritic Cells and Natural Killer Cells
1846	1.169741123	NA	335	2	16h_DINCH_1_ctrlLPS	16h_ctrlLPS_pvalue	CTLA4 Signaling in Cytotoxic T Lymphocytes
1847	1.814887198	-0.277	334	11	16h_DINCH_1_ctrlLPS	16h_ctrlLPS_pvalue	CXCR4 Signaling
1848	0.211107419	NA	332	2	16h_DINCH_1_ctrlLPS	16h_ctrlLPS_pvalue	Cysteine Biosynthesis III (mammalia)
1849	0.922419079	NA	331	2	16h_DINCH_1_ctrlLPS	16h_ctrlLPS_pvalue	Cytotoxic T Lymphocyte-mediated Apoptosis of Target Cells
1850	0	NA	329	2	16h_DINCH_1_ctrlLPS	16h_ctrlLPS_pvalue	D-mannose Degradation
1851	0.800491496	NA	328	2	16h_DINCH_1_ctrlLPS	16h_ctrlLPS_pvalue	D-myo-inositol (1,4,5)-Trisphosphate Biosynthesis
1852	0.633270993	-0.447	325	23	16h_DINCH_1_ctrlLPS	16h_ctrlLPS_pvalue	Death Receptor Signaling
1853	0.689050171	1.667	323	7	16h_DINCH_1_ctrlLPS	16h_ctrlLPS_pvalue	Dendritic Cell Maturation
1854	1.752084172	NA	322	2	16h_DINCH_1_ctrlLPS	16h_ctrlLPS_pvalue	DNA Double-Strand Break Repair by Non-Homologous End Joining
1855	0.347391779	NA	318	2	16h_DINCH_1_ctrlLPS	16h_ctrlLPS_pvalue	DNA Methylation and Transcriptional Repression Signaling
1856	0.800491496	NA	317	2	16h_DINCH_1_ctrlLPS	16h_ctrlLPS_pvalue	Docosahexaenoic Acid (DHA) Signaling
1857	0.800491496	0	312	9	16h_DINCH_1_ctrlLPS	16h_ctrlLPS_pvalue	Dopamine-DARPP32 Feedback in cAMP Signaling
1858	1.074704386	0	311	24	16h_DINCH_1_ctrlLPS	16h_ctrlLPS_pvalue	EGF Signaling
1859	6.402348887	-2.065	308	25	16h_DINCH_1_ctrlLPS	16h_ctrlLPS_pvalue	EIF2 Signaling
1860	1.113696973	0.302	307	2	16h_DINCH_1_ctrlLPS	16h_ctrlLPS_pvalue	Endocannabinoid Cancer Inhibition Pathway
1861	1.224028256	-0.333	302	21	16h_DINCH_1_ctrlLPS	16h_ctrlLPS_pvalue	Endocannabinoid Developing Neuron Pathway
1862	0.520147234	1	301	5	16h_DINCH_1_ctrlLPS	16h_ctrlLPS_pvalue	Endometrial Cancer Signaling
1863	0.200357405	NA	297	23	16h_DINCH_1_ctrlLPS	16h_ctrlLPS_pvalue	Endoplasmic Reticulum Stress Pathway
1864	0.664314006	0	296	18	16h_DINCH_1_ctrlLPS	16h_ctrlLPS_pvalue	Endothelin-1 Signaling
1865	1.336537077	0.707	293	26	16h_DINCH_1_ctrlLPS	16h_ctrlLPS_pvalue	eNOS Signaling
1866	0.452353935	NA	292	2	16h_DINCH_1_ctrlLPS	16h_ctrlLPS_pvalue	Ephrin A Signaling
1867	1.141244241	0	286	27	16h_DINCH_1_ctrlLPS	16h_ctrlLPS_pvalue	Ephrin B Signaling
1868	1.226511785	-1.732	285	4	16h_DINCH_1_ctrlLPS	16h_ctrlLPS_pvalue	Ephrin Receptor Signaling
1869	1.224028256	NA	278	2	16h_DINCH_1_ctrlLPS	16h_ctrlLPS_pvalue	Epithelial Adherens Junction Signaling
1870	0	NA	270	2	16h_DINCH_1_ctrlLPS	16h_ctrlLPS_pvalue	Epoxysqualene Biosynthesis
1871	0.439960496	0.447	266	27	16h_DINCH_1_ctrlLPS	16h_ctrlLPS_pvalue	ErbB Signaling
1872	0.509707197	1	264	11	16h_DINCH_1_ctrlLPS	16h_ctrlLPS_pvalue	ErbB2-ErbB3 Signaling
1873	0.668236158	0.447	262	2	16h_DINCH_1_ctrlLPS	16h_ctrlLPS_pvalue	ErbB4 Signaling
1874	0.857492987	0.333	253	28	16h_DINCH_1_ctrlLPS	16h_ctrlLPS_pvalue	ERK/MAPK Signaling
1875	0.811288597	0	252	8	16h_DINCH_1_ctrlLPS	16h_ctrlLPS_pvalue	ERK5 Signaling
1876	0.750521816	NA	251	2	16h_DINCH_1_ctrlLPS	16h_ctrlLPS_pvalue	Erythropoietin Signaling
1877	0.84791512	1	238	6	16h_DINCH_1_ctrlLPS	16h_ctrlLPS_pvalue	Estrogen-Dependent Breast Cancer Signaling
1878	0.657028041	NA	249	24	16h_DINCH_1_ctrlLPS	16h_ctrlLPS_pvalue	Estrogen Biosynthesis
1879	2.909338514	-0.209	248	18	16h_DINCH_1_ctrlLPS	16h_ctrlLPS_pvalue	Estrogen Receptor Signaling
1880	0.575730701	NA	236	2	16h_DINCH_1_ctrlLPS	16h_ctrlLPS_pvalue	Ethanol Degradation IV
1881	0.575730701	NA	233	2	16h_DINCH_1_ctrlLPS	16h_ctrlLPS_pvalue	Eumelanin Biosynthesis
1882	1.697305626	NA	219	2	16h_DINCH_1_ctrlLPS	16h_ctrlLPS_pvalue	FAK Signaling
1883	0.233329722	NA	216	2	16h_DINCH_1_ctrlLPS	16h_ctrlLPS_pvalue	FAT10 Signaling Pathway
1884	2.158738112	-0.816	214	9	16h_DINCH_1_ctrlLPS	16h_ctrlLPS_pvalue	Fatty Acid ?-oxidation I
1885	0.786517838	NA	215	2	16h_DINCH_1_ctrlLPS	16h_ctrlLPS_pvalue	Fatty Acid Activation
1886	0.612324123	0.378	213	2	16h_DINCH_1_ctrlLPS	16h_ctrlLPS_pvalue	Fc Epsilon RI Signaling
1887	2.439864166	-1.732	212	16	16h_DINCH_1_ctrlLPS	16h_ctrlLPS_pvalue	Fc? Receptor-mediated Phagocytosis in Macrophages and Monocytes
1888	0.472760138	1	211	7	16h_DINCH_1_ctrlLPS	16h_ctrlLPS_pvalue	Fc?RIIB Signaling in B Lymphocytes
1889	0.58879945	0.447	210	6	16h_DINCH_1_ctrlLPS	16h_ctrlLPS_pvalue	FGF Signaling
1890	0.539623827	1.342	209	11	16h_DINCH_1_ctrlLPS	16h_ctrlLPS_pvalue	FLT3 Signaling in Hematopoietic Progenitor Cells
1891	1.859067545	-0.577	208	19	16h_DINCH_1_ctrlLPS	16h_ctrlLPS_pvalue	fMLP Signaling in Neutrophils
1892	0.374673342	NA	200	2	16h_DINCH_1_ctrlLPS	16h_ctrlLPS_pvalue	Folate Transformations I
1893	0.802033347	0	199	18	16h_DINCH_1_ctrlLPS	16h_ctrlLPS_pvalue	G Beta Gamma Signaling
1894	0.399597914	NA	197	2	16h_DINCH_1_ctrlLPS	16h_ctrlLPS_pvalue	G Protein Signaling Mediated by Tubby
1895	0.944820573	0.333	127	5	16h_DINCH_1_ctrlLPS	16h_ctrlLPS_pvalue	G?12/13 Signaling
1896	0.42840243	0	125	27	16h_DINCH_1_ctrlLPS	16h_ctrlLPS_pvalue	G?i Signaling
1897	1.074704386	-0.302	124	24	16h_DINCH_1_ctrlLPS	16h_ctrlLPS_pvalue	G?q Signaling
1898	0.897310378	NA	195	2	16h_DINCH_1_ctrlLPS	16h_ctrlLPS_pvalue	Gap Junction Signaling
1899	0.608129032	1	194	5	16h_DINCH_1_ctrlLPS	16h_ctrlLPS_pvalue	GDNF Family Ligand-Receptor Interactions
1900	0.374673342	NA	193	2	16h_DINCH_1_ctrlLPS	16h_ctrlLPS_pvalue	GDP-glucose Biosynthesis
1901	0.477169562	NA	190	2	16h_DINCH_1_ctrlLPS	16h_ctrlLPS_pvalue	GDP-mannose Biosynthesis
1902	1.169741123	NA	186	2	16h_DINCH_1_ctrlLPS	16h_ctrlLPS_pvalue	Germ Cell-Sertoli Cell Junction Signaling
1903	0.792223768	-0.632	178	21	16h_DINCH_1_ctrlLPS	16h_ctrlLPS_pvalue	Glioblastoma Multiforme Signaling
1904	0.84791512	0.816	174	5	16h_DINCH_1_ctrlLPS	16h_ctrlLPS_pvalue	Glioma Invasiveness Signaling
1905	0.648208777	0	173	24	16h_DINCH_1_ctrlLPS	16h_ctrlLPS_pvalue	Glioma Signaling
1906	0.679721987	NA	171	2	16h_DINCH_1_ctrlLPS	16h_ctrlLPS_pvalue	Glucocorticoid Receptor Signaling
1907	0.821822112	NA	169	8	16h_DINCH_1_ctrlLPS	16h_ctrlLPS_pvalue	Gluconeogenesis I
1908	0.374673342	NA	168	2	16h_DINCH_1_ctrlLPS	16h_ctrlLPS_pvalue	Glucose and Glucose-1-phosphate Degradation
1909	0	NA	164	2	16h_DINCH_1_ctrlLPS	16h_ctrlLPS_pvalue	Glutamate Degradation II
1910	0	NA	163	2	16h_DINCH_1_ctrlLPS	16h_ctrlLPS_pvalue	Glutamate Removal from Folates
1911	0	NA	159	2	16h_DINCH_1_ctrlLPS	16h_ctrlLPS_pvalue	Glutamine Degradation I
1912	1.004244529	NA	156	2	16h_DINCH_1_ctrlLPS	16h_ctrlLPS_pvalue	Glutaryl-CoA Degradation
1913	0.200357405	NA	143	2	16h_DINCH_1_ctrlLPS	16h_ctrlLPS_pvalue	Glutathione-mediated Detoxification
1914	0.546599324	NA	155	2	16h_DINCH_1_ctrlLPS	16h_ctrlLPS_pvalue	Glutathione Redox Reactions I
1915	0.575730701	NA	150	2	16h_DINCH_1_ctrlLPS	16h_ctrlLPS_pvalue	Glutathione Redox Reactions II
1916	0.477169562	NA	141	2	16h_DINCH_1_ctrlLPS	16h_ctrlLPS_pvalue	Glycogen Biosynthesis II (from UDP-D-Glucose)
1917	0.814972209	NA	139	2	16h_DINCH_1_ctrlLPS	16h_ctrlLPS_pvalue	Glycogen Degradation II
1918	0.736201129	NA	138	2	16h_DINCH_1_ctrlLPS	16h_ctrlLPS_pvalue	Glycogen Degradation III
1919	1.270804643	-1	137	16	16h_DINCH_1_ctrlLPS	16h_ctrlLPS_pvalue	Glycolysis I
1920	0.821822112	0.447	136	11	16h_DINCH_1_ctrlLPS	16h_ctrlLPS_pvalue	GM-CSF Signaling
1921	0.618007168	-0.333	135	8	16h_DINCH_1_ctrlLPS	16h_ctrlLPS_pvalue	GNRH Signaling
1922	0.529896461	0	133	12	16h_DINCH_1_ctrlLPS	16h_ctrlLPS_pvalue	GPCR-Mediated Integration of Enteroendocrine Signaling Exemplified by an L Cell
1923	0	NA	129	2	16h_DINCH_1_ctrlLPS	16h_ctrlLPS_pvalue	Granzyme A Signaling
1924	2.33210795	-1.342	128	17	16h_DINCH_1_ctrlLPS	16h_ctrlLPS_pvalue	Granzyme B Signaling
1925	0.334751189	NA	122	2	16h_DINCH_1_ctrlLPS	16h_ctrlLPS_pvalue	HER-2 Signaling in Breast Cancer
1926	0.625399039	NA	114	2	16h_DINCH_1_ctrlLPS	16h_ctrlLPS_pvalue	Hereditary Breast Cancer Signaling
1927	0.793970368	-0.577	113	5	16h_DINCH_1_ctrlLPS	16h_ctrlLPS_pvalue	HIF1? Signaling
1928	0.334751189	NA	112	29	16h_DINCH_1_ctrlLPS	16h_ctrlLPS_pvalue	HIPPO signaling
1929	0.317647662	NA	111	2	16h_DINCH_1_ctrlLPS	16h_ctrlLPS_pvalue	Histamine Degradation
1930	0.49014558	0.707	110	5	16h_DINCH_1_ctrlLPS	16h_ctrlLPS_pvalue	HMGB1 Signaling
1931	0	0	106	12	16h_DINCH_1_ctrlLPS	16h_ctrlLPS_pvalue	HOTAIR Regulatory Pathway
1932	2.961030439	-1.155	100	30	16h_DINCH_1_ctrlLPS	16h_ctrlLPS_pvalue	Huntington's Disease Signaling
1933	1.814742761	NA	99	2	16h_DINCH_1_ctrlLPS	16h_ctrlLPS_pvalue	Hypoxia Signaling in the Cardiovascular System
1934	0	NA	96	2	16h_DINCH_1_ctrlLPS	16h_ctrlLPS_pvalue	Hypusine Biosynthesis
1935	0.66308869	1.633	86	12	16h_DINCH_1_ctrlLPS	16h_ctrlLPS_pvalue	iCOS-iCOSL Signaling in T Helper Cells
1936	0.880818205	1.633	85	5	16h_DINCH_1_ctrlLPS	16h_ctrlLPS_pvalue	IGF-1 Signaling
1937	0.450202823	NA	84	9	16h_DINCH_1_ctrlLPS	16h_ctrlLPS_pvalue	IL-1 Signaling
1938	0.42840243	NA	81	2	16h_DINCH_1_ctrlLPS	16h_ctrlLPS_pvalue	IL-10 Signaling
1939	1.224028256	NA	80	2	16h_DINCH_1_ctrlLPS	16h_ctrlLPS_pvalue	IL-12 Signaling and Production in Macrophages
1940	0.770901919	0	79	6	16h_DINCH_1_ctrlLPS	16h_ctrlLPS_pvalue	IL-15 Signaling
1941	0.344157374	NA	78	2	16h_DINCH_1_ctrlLPS	16h_ctrlLPS_pvalue	IL-17 Signaling
1942	0.679721987	1	76	6	16h_DINCH_1_ctrlLPS	16h_ctrlLPS_pvalue	IL-17A Signaling in Airway Cells
1943	0	NA	73	2	16h_DINCH_1_ctrlLPS	16h_ctrlLPS_pvalue	IL-17A Signaling in Fibroblasts
1944	0.433112139	NA	70	2	16h_DINCH_1_ctrlLPS	16h_ctrlLPS_pvalue	IL-17A Signaling in Gastric Cells
1945	0.696541708	0.447	68	2	16h_DINCH_1_ctrlLPS	16h_ctrlLPS_pvalue	IL-2 Signaling
1946	0.452353935	NA	67	6	16h_DINCH_1_ctrlLPS	16h_ctrlLPS_pvalue	IL-23 Signaling Pathway
1947	0.944820573	1.134	66	5	16h_DINCH_1_ctrlLPS	16h_ctrlLPS_pvalue	IL-3 Signaling
1948	0.334751189	NA	65	2	16h_DINCH_1_ctrlLPS	16h_ctrlLPS_pvalue	IL-4 Signaling
1949	0.689050171	1.134	64	6	16h_DINCH_1_ctrlLPS	16h_ctrlLPS_pvalue	IL-6 Signaling
1950	1.226511785	-1.069	63	21	16h_DINCH_1_ctrlLPS	16h_ctrlLPS_pvalue	IL-8 Signaling
1951	0.330975284	NA	62	5	16h_DINCH_1_ctrlLPS	16h_ctrlLPS_pvalue	IL-9 Signaling
1952	1.602798415	0.277	61	21	16h_DINCH_1_ctrlLPS	16h_ctrlLPS_pvalue	ILK Signaling
1953	0.969936352	0.447	60	12	16h_DINCH_1_ctrlLPS	16h_ctrlLPS_pvalue	Induction of Apoptosis by HIV1
1954	0.84791512	NA	56	2	16h_DINCH_1_ctrlLPS	16h_ctrlLPS_pvalue	Inflammasome pathway
1955	0.918375385	0.333	48	31	16h_DINCH_1_ctrlLPS	16h_ctrlLPS_pvalue	Inhibition of ARE-Mediated mRNA Degradation Pathway
1956	0	NA	46	2	16h_DINCH_1_ctrlLPS	16h_ctrlLPS_pvalue	Inosine-5'-phosphate Biosynthesis II
1957	0.792223768	0.333	42	17	16h_DINCH_1_ctrlLPS	16h_ctrlLPS_pvalue	Insulin Receptor Signaling
1958	1.602798415	-0.5	38	8	16h_DINCH_1_ctrlLPS	16h_ctrlLPS_pvalue	Insulin Secretion Signaling Pathway
1959	3.559154752	-0.447	37	1	16h_DINCH_1_ctrlLPS	16h_ctrlLPS_pvalue	Integrin Signaling
1960	0	NA	35	2	16h_DINCH_1_ctrlLPS	16h_ctrlLPS_pvalue	Interferon Signaling
1961	1.004244529	NA	33	13	16h_DINCH_1_ctrlLPS	16h_ctrlLPS_pvalue	Isoleucine Degradation I
1962	0.529896461	0.447	31	6	16h_DINCH_1_ctrlLPS	16h_ctrlLPS_pvalue	JAK/Stat Signaling
1963	0.334751189	NA	24	2	16h_DINCH_1_ctrlLPS	16h_ctrlLPS_pvalue	Ketogenesis
1964	0.399730161	NA	17	2	16h_DINCH_1_ctrlLPS	16h_ctrlLPS_pvalue	Ketolysis
1965	0	NA	15	2	16h_DINCH_1_ctrlLPS	16h_ctrlLPS_pvalue	L-cysteine Degradation I
1966	0.84791512	1	13	12	16h_DINCH_1_ctrlLPS	16h_ctrlLPS_pvalue	Leptin Signaling in Obesity
1967	0.374673342	NA	12	2	16h_DINCH_1_ctrlLPS	16h_ctrlLPS_pvalue	Leucine Degradation I
1968	1.814887198	-0.258	6	3	16h_DINCH_1_ctrlLPS	16h_ctrlLPS_pvalue	Leukocyte Extravasation Signaling
1969	0.334751189	NA	5	2	16h_DINCH_1_ctrlLPS	16h_ctrlLPS_pvalue	Leukotriene Biosynthesis
1970	0.786517838	NA	2	2	16h_DINCH_1_ctrlLPS	16h_ctrlLPS_pvalue	Lipid Antigen Presentation by CD1
1971	0.689050171	0.816	4	6	16h_DINCH_1_ctrlLPS	16h_ctrlLPS_pvalue	LPS-stimulated MAPK Signaling
1972	0.364683746	NA	140	18	16h_DINCH_1_ctrlLPS	16h_ctrlLPS_pvalue	LXR/RXR Activation
1973	0.354501761	NA	226	6	16h_DINCH_1_ctrlLPS	16h_ctrlLPS_pvalue	Lymphotoxin ? Receptor Signaling
1974	1.074704386	0	40	5	16h_DINCH_1_ctrlLPS	16h_ctrlLPS_pvalue	Macropinocytosis Signaling
1975	0.589794193	0.816	116	7	16h_DINCH_1_ctrlLPS	16h_ctrlLPS_pvalue	Melanocyte Development and Pigmentation Signaling
1976	0.625399039	1	36	5	16h_DINCH_1_ctrlLPS	16h_ctrlLPS_pvalue	Melanoma Signaling
1977	0.870772879	0	247	18	16h_DINCH_1_ctrlLPS	16h_ctrlLPS_pvalue	Melatonin Signaling
1978	0.233329722	NA	261	2	16h_DINCH_1_ctrlLPS	16h_ctrlLPS_pvalue	Methionine Degradation I (to Homocysteine)
1979	0	NA	327	2	16h_DINCH_1_ctrlLPS	16h_ctrlLPS_pvalue	Methylmalonyl Pathway
1980	0.833726523	NA	103	2	16h_DINCH_1_ctrlLPS	16h_ctrlLPS_pvalue	Methylthiopropionate Biosynthesis
1981	1.169741123	NA	175	2	16h_DINCH_1_ctrlLPS	16h_ctrlLPS_pvalue	Mevalonate Pathway I
1982	0.625399039	NA	254	2	16h_DINCH_1_ctrlLPS	16h_ctrlLPS_pvalue	MIF-mediated Glucocorticoid Regulation
1983	0.612324123	NA	272	2	16h_DINCH_1_ctrlLPS	16h_ctrlLPS_pvalue	Mismatch Repair in Eukaryotes
1984	5.631881587	NA	34	2	16h_DINCH_1_ctrlLPS	16h_ctrlLPS_pvalue	Mitochondrial Dysfunction
1985	1.278872664	NA	313	2	16h_DINCH_1_ctrlLPS	16h_ctrlLPS_pvalue	Mitotic Roles of Polo-Like Kinase
1986	0.506845886	NA	348	2	16h_DINCH_1_ctrlLPS	16h_ctrlLPS_pvalue	Molecular Mechanisms of Cancer
1987	2.33210795	-0.707	289	32	16h_DINCH_1_ctrlLPS	16h_ctrlLPS_pvalue	mTOR Signaling
1988	0.392393075	NA	142	10	16h_DINCH_1_ctrlLPS	16h_ctrlLPS_pvalue	Myc Mediated Apoptosis Signaling
1989	0	NA	309	2	16h_DINCH_1_ctrlLPS	16h_ctrlLPS_pvalue	NAD Phosphorylation and Dephosphorylation
1990	0.58879945	0.632	277	13	16h_DINCH_1_ctrlLPS	16h_ctrlLPS_pvalue	Natural Killer Cell Signaling
1991	1.278872664	-0.577	82	2	16h_DINCH_1_ctrlLPS	16h_ctrlLPS_pvalue	Necroptosis Signaling Pathway
1992	1.169741123	0.707	93	26	16h_DINCH_1_ctrlLPS	16h_ctrlLPS_pvalue	NER Pathway
1993	0.173615144	NA	23	2	16h_DINCH_1_ctrlLPS	16h_ctrlLPS_pvalue	Netrin Signaling
1994	1.018284238	-1.342	234	21	16h_DINCH_1_ctrlLPS	16h_ctrlLPS_pvalue	Neuregulin Signaling
1995	1.018284238	0.707	49	10	16h_DINCH_1_ctrlLPS	16h_ctrlLPS_pvalue	Neuropathic Pain Signaling In Dorsal Horn Neurons
1996	0.483450444	NA	102	2	16h_DINCH_1_ctrlLPS	16h_ctrlLPS_pvalue	Neuroprotective Role of THOP1 in Alzheimer's Disease
1997	0.512752162	1.342	120	6	16h_DINCH_1_ctrlLPS	16h_ctrlLPS_pvalue	NF-?B Activation by Viruses
1998	0.612324123	0.378	77	6	16h_DINCH_1_ctrlLPS	16h_ctrlLPS_pvalue	NGF Signaling
1999	2.158738112	-0.302	147	28	16h_DINCH_1_ctrlLPS	16h_ctrlLPS_pvalue	Nitric Oxide Signaling in the Cardiovascular System
[truncated: 4,609 more rows]
