# Supplementary material for: The Emerging Plasticizer Alternative DINCH and Its Metabolite MINCH Induce Oxidative Stress and Enhance Inflammatory Responses in Human THP-1 Macrophages
Source: Cells. 2021 Sep 9;10(9):2367. doi: 10.3390/cells10092367 (PMC8466537; doi:10.3390/cells10092367)
Supplement: Supplementary file 1 [file cells-10-02367-s001.zip › Supplement 9.csv]

	DINCH	MINCH	DINCH_4_h	DINCH_16_h	DINCH_1_d	MINCH_4_h	MINCH_16_h	MINCH_1_d
16h_DINCH_10000nM_ctrlLPS_40	1	0	0	1	0	0	0	0
16h_DINCH_10000nM_ctrlLPS_48	1	0	0	1	0	0	0	0
16h_DINCH_10000nM_ctrlLPS_52	1	0	0	1	0	0	0	0
16h_DINCH_10000nM_ctrlLPS_60	1	0	0	1	0	0	0	0
16h_DINCH_1000nM_ctrlLPS_35	1	0	0	1	0	0	0	0
16h_DINCH_1000nM_ctrlLPS_43	1	0	0	1	0	0	0	0
16h_DINCH_1000nM_ctrlLPS_51	1	0	0	1	0	0	0	0
16h_DINCH_1000nM_ctrlLPS_59	1	0	0	1	0	0	0	0
16h_DINCH_100nM_ctrlLPS_34	1	0	0	1	0	0	0	0
16h_DINCH_100nM_ctrlLPS_42	1	0	0	1	0	0	0	0
16h_DINCH_100nM_ctrlLPS_50	1	0	0	1	0	0	0	0
16h_DINCH_100nM_ctrlLPS_58	1	0	0	1	0	0	0	0
16h_DINCH_10nM_ctrlLPS_33	1	0	0	1	0	0	0	0
16h_DINCH_10nM_ctrlLPS_41	1	0	0	1	0	0	0	0
16h_DINCH_10nM_ctrlLPS_49	1	0	0	1	0	0	0	0
16h_DINCH_10nM_ctrlLPS_57	1	0	0	1	0	0	0	0
16h_MINCH_10000nM_ctrlLPS_39	0	1	0	0	0	0	1	1
16h_MINCH_10000nM_ctrlLPS_47	0	1	0	0	0	0	1	1
16h_MINCH_10000nM_ctrlLPS_56	0	1	0	0	0	0	1	1
16h_MINCH_10000nM_ctrlLPS_64	0	1	0	0	0	0	1	1
16h_MINCH_1000nM_ctrlLPS_38	0	1	0	0	0	0	1	1
16h_MINCH_1000nM_ctrlLPS_46	0	1	0	0	0	0	1	1
16h_MINCH_1000nM_ctrlLPS_55	0	1	0	0	0	0	1	1
16h_MINCH_1000nM_ctrlLPS_63	0	1	0	0	0	0	1	1
16h_MINCH_100nM_ctrlLPS_37	0	1	0	0	0	0	1	1
16h_MINCH_100nM_ctrlLPS_45	0	1	0	0	0	0	1	1
16h_MINCH_100nM_ctrlLPS_54	0	1	0	0	0	0	1	1
16h_MINCH_100nM_ctrlLPS_62	0	1	0	0	0	0	1	1
16h_MINCH_10nM_ctrlLPS_36	0	1	0	0	0	0	1	1
16h_MINCH_10nM_ctrlLPS_44	0	1	0	0	0	0	1	1
16h_MINCH_10nM_ctrlLPS_53	0	1	0	0	0	0	1	1
16h_MINCH_10nM_ctrlLPS_61	0	1	0	0	0	0	1	1
1d_DINCH_10000nM_ctrlLPS_68	1	0	0	0	1	0	0	0
1d_DINCH_10000nM_ctrlLPS_76	1	0	0	0	1	0	0	0
1d_DINCH_10000nM_ctrlLPS_84	1	0	0	0	1	0	0	0
1d_DINCH_10000nM_ctrlLPS_92	1	0	0	0	1	0	0	0
1d_DINCH_1000nM_ctrlLPS_67	1	0	0	0	1	0	0	0
1d_DINCH_1000nM_ctrlLPS_75	1	0	0	0	1	0	0	0
1d_DINCH_1000nM_ctrlLPS_83	1	0	0	0	1	0	0	0
1d_DINCH_1000nM_ctrlLPS_91	1	0	0	0	1	0	0	0
1d_DINCH_100nM_ctrlLPS_66	1	0	0	0	1	0	0	0
1d_DINCH_100nM_ctrlLPS_74	1	0	0	0	1	0	0	0
1d_DINCH_100nM_ctrlLPS_82	1	0	0	0	1	0	0	0
1d_DINCH_100nM_ctrlLPS_90	1	0	0	0	1	0	0	0
1d_DINCH_10nM_ctrlLPS_65	1	0	0	0	1	0	0	0
1d_DINCH_10nM_ctrlLPS_73	1	0	0	0	1	0	0	0
1d_DINCH_10nM_ctrlLPS_81	1	0	0	0	1	0	0	0
1d_DINCH_10nM_ctrlLPS_89	1	0	0	0	1	0	0	0
1d_MINCH_10000nM_ctrlLPS_72	0	1	0	0	0	0	0	0
1d_MINCH_10000nM_ctrlLPS_80	0	1	0	0	0	0	0	0
1d_MINCH_10000nM_ctrlLPS_88	0	1	0	0	0	0	0	0
1d_MINCH_10000nM_ctrlLPS_96	0	1	0	0	0	0	0	0
1d_MINCH_1000nM_ctrlLPS_71	0	1	0	0	0	0	0	0
1d_MINCH_1000nM_ctrlLPS_79	0	1	0	0	0	0	0	0
1d_MINCH_1000nM_ctrlLPS_87	0	1	0	0	0	0	0	0
1d_MINCH_1000nM_ctrlLPS_95	0	1	0	0	0	0	0	0
1d_MINCH_100nM_ctrlLPS_70	0	1	0	0	0	0	0	0
1d_MINCH_100nM_ctrlLPS_78	0	1	0	0	0	0	0	0
1d_MINCH_100nM_ctrlLPS_86	0	1	0	0	0	0	0	0
1d_MINCH_100nM_ctrlLPS_94	0	1	0	0	0	0	0	0
1d_MINCH_10nM_ctrlLPS_69	0	1	0	0	0	0	0	0
1d_MINCH_10nM_ctrlLPS_77	0	1	0	0	0	0	0	0
1d_MINCH_10nM_ctrlLPS_85	0	1	0	0	0	0	0	0
1d_MINCH_10nM_ctrlLPS_93	0	1	0	0	0	0	0	0
4h_DINCH_10000nM_ctrlLPS_16	1	0	1	0	0	0	0	0
4h_DINCH_10000nM_ctrlLPS_24	1	0	1	0	0	0	0	0
4h_DINCH_10000nM_ctrlLPS_32	1	0	1	0	0	0	0	0
4h_DINCH_10000nM_ctrlLPS_8	1	0	1	0	0	0	0	0
4h_DINCH_1000nM_ctrlLPS_11	1	0	1	0	0	0	0	0
4h_DINCH_1000nM_ctrlLPS_19	1	0	1	0	0	0	0	0
4h_DINCH_1000nM_ctrlLPS_27	1	0	1	0	0	0	0	0
4h_DINCH_1000nM_ctrlLPS_3	1	0	1	0	0	0	0	0
4h_DINCH_100nM_ctrlLPS_10	1	0	1	0	0	0	0	0
4h_DINCH_100nM_ctrlLPS_18	1	0	1	0	0	0	0	0
4h_DINCH_100nM_ctrlLPS_2	1	0	1	0	0	0	0	0
4h_DINCH_100nM_ctrlLPS_26	1	0	1	0	0	0	0	0
4h_DINCH_10nM_ctrlLPS_1	1	0	1	0	0	0	0	0
4h_DINCH_10nM_ctrlLPS_17	1	0	1	0	0	0	0	0
4h_DINCH_10nM_ctrlLPS_25	1	0	1	0	0	0	0	0
4h_DINCH_10nM_ctrlLPS_9	1	0	1	0	0	0	0	0
4h_MINCH_10000nM_ctrlLPS_15	0	1	0	0	0	1	0	0
4h_MINCH_10000nM_ctrlLPS_23	0	1	0	0	0	1	0	0
4h_MINCH_10000nM_ctrlLPS_31	0	1	0	0	0	1	0	0
4h_MINCH_10000nM_ctrlLPS_7	0	1	0	0	0	1	0	0
4h_MINCH_1000nM_ctrlLPS_14	0	1	0	0	0	1	0	0
4h_MINCH_1000nM_ctrlLPS_22	0	1	0	0	0	1	0	0
4h_MINCH_1000nM_ctrlLPS_30	0	1	0	0	0	1	0	0
4h_MINCH_1000nM_ctrlLPS_6	0	1	0	0	0	1	0	0
4h_MINCH_100nM_ctrlLPS_13	0	1	0	0	0	1	0	0
4h_MINCH_100nM_ctrlLPS_21	0	1	0	0	0	1	0	0
4h_MINCH_100nM_ctrlLPS_29	0	1	0	0	0	1	0	0
4h_MINCH_100nM_ctrlLPS_5	0	1	0	0	0	1	0	0
4h_MINCH_10nM_ctrlLPS_12	0	1	0	0	0	1	0	0
4h_MINCH_10nM_ctrlLPS_20	0	1	0	0	0	1	0	0
4h_MINCH_10nM_ctrlLPS_28	0	1	0	0	0	1	0	0
4h_MINCH_10nM_ctrlLPS_4	0	1	0	0	0	1	0	0
