# Supplementary material for: The Emerging Plasticizer Alternative DINCH and Its Metabolite MINCH Induce Oxidative Stress and Enhance Inflammatory Responses in Human THP-1 Macrophages
Source: Cells. 2021 Sep 9;10(9):2367. doi: 10.3390/cells10092367 (PMC8466537; doi:10.3390/cells10092367)
Supplement: Supplementary file 1 [file cells-10-02367-s001.zip › Supplement 10.csv]

	Treatment	FC	pvalue	Gene	Module	Selection	ClusterOrder	ClusterName	Accession	Dataset	Comparison	Order	Name	Label	KeyDriverSel
58	4h_DINCH_10nM_ctrlLPS	-0.148678634325294	0.0666428795579475	NQO1	black	UniprotAccessions-black_DINCH_1_d_strict_GS4_MM4	2	Cluster 1	B4DLR8	vs_LPS	DINCH	1	4h_DINCH_10nM		black_DINCH_1_d
59	4h_DINCH_10nM_ctrlLPS	-0.0596108426320801	0.119389868327211	SEC22B	black	UniprotAccessions-black_DINCH_1_d_strict_GS4_MM4	3	Cluster 2	O75396	vs_LPS	DINCH	1	4h_DINCH_10nM		black_DINCH_1_d
60	4h_DINCH_10nM_ctrlLPS	-0.0625974538209086	0.0674432843472563	CNPY3	black	UniprotAccessions-black_DINCH_1_d_strict_GS4_MM4	1	Cluster 2	Q9BT09	vs_LPS	DINCH	1	4h_DINCH_10nM		black_DINCH_1_d
55	4h_DINCH_100nM_ctrlLPS	-0.251975293718551	0.00274298697303369	NQO1	black	UniprotAccessions-black_DINCH_1_d_strict_GS4_MM4	2	Cluster 1	B4DLR8	vs_LPS	DINCH	2	4h_DINCH_100nM	**	black_DINCH_1_d
56	4h_DINCH_100nM_ctrlLPS	-0.0459044817463267	0.00258012394531939	SEC22B	black	UniprotAccessions-black_DINCH_1_d_strict_GS4_MM4	3	Cluster 2	O75396	vs_LPS	DINCH	2	4h_DINCH_100nM	**	black_DINCH_1_d
57	4h_DINCH_100nM_ctrlLPS	-0.147867423997508	0.0116528183707359	CNPY3	black	UniprotAccessions-black_DINCH_1_d_strict_GS4_MM4	1	Cluster 2	Q9BT09	vs_LPS	DINCH	2	4h_DINCH_100nM	*	black_DINCH_1_d
52	4h_DINCH_1000nM_ctrlLPS	-0.153322641432666	0.0140510440794513	NQO1	black	UniprotAccessions-black_DINCH_1_d_strict_GS4_MM4	2	Cluster 1	B4DLR8	vs_LPS	DINCH	3	4h_DINCH_1000nM	*	black_DINCH_1_d
53	4h_DINCH_1000nM_ctrlLPS	-0.0643529099910009	0.135831052150975	SEC22B	black	UniprotAccessions-black_DINCH_1_d_strict_GS4_MM4	3	Cluster 2	O75396	vs_LPS	DINCH	3	4h_DINCH_1000nM		black_DINCH_1_d
54	4h_DINCH_1000nM_ctrlLPS	-0.117591502945824	0.0145086447992979	CNPY3	black	UniprotAccessions-black_DINCH_1_d_strict_GS4_MM4	1	Cluster 2	Q9BT09	vs_LPS	DINCH	3	4h_DINCH_1000nM	*	black_DINCH_1_d
49	4h_DINCH_10000nM_ctrlLPS	-0.213997284690873	0.00321767403152238	NQO1	black	UniprotAccessions-black_DINCH_1_d_strict_GS4_MM4	2	Cluster 1	B4DLR8	vs_LPS	DINCH	4	4h_DINCH_10000nM	**	black_DINCH_1_d
50	4h_DINCH_10000nM_ctrlLPS	-0.122686177435664	3.20501229174169e-07	SEC22B	black	UniprotAccessions-black_DINCH_1_d_strict_GS4_MM4	3	Cluster 2	O75396	vs_LPS	DINCH	4	4h_DINCH_10000nM	***	black_DINCH_1_d
51	4h_DINCH_10000nM_ctrlLPS	-0.140825876836396	0.00616501433654129	CNPY3	black	UniprotAccessions-black_DINCH_1_d_strict_GS4_MM4	1	Cluster 2	Q9BT09	vs_LPS	DINCH	4	4h_DINCH_10000nM	**	black_DINCH_1_d
70	4h_MINCH_10nM_ctrlLPS	-0.106916785190698	0.0250510113570076	NQO1	black	UniprotAccessions-black_DINCH_1_d_strict_GS4_MM4	2	Cluster 1	B4DLR8	vs_LPS	MINCH	5	4h_MINCH_10nM	*	black_DINCH_1_d
71	4h_MINCH_10nM_ctrlLPS	-0.0630102287095015	0.0444731774940746	SEC22B	black	UniprotAccessions-black_DINCH_1_d_strict_GS4_MM4	3	Cluster 2	O75396	vs_LPS	MINCH	5	4h_MINCH_10nM	*	black_DINCH_1_d
72	4h_MINCH_10nM_ctrlLPS	-0.0677847443296793	0.0661370820606697	CNPY3	black	UniprotAccessions-black_DINCH_1_d_strict_GS4_MM4	1	Cluster 2	Q9BT09	vs_LPS	MINCH	5	4h_MINCH_10nM		black_DINCH_1_d
67	4h_MINCH_100nM_ctrlLPS	-0.113771343603801	0.0109060681036968	NQO1	black	UniprotAccessions-black_DINCH_1_d_strict_GS4_MM4	2	Cluster 1	B4DLR8	vs_LPS	MINCH	6	4h_MINCH_100nM	*	black_DINCH_1_d
68	4h_MINCH_100nM_ctrlLPS	-0.142391634656531	0.000104886813621971	SEC22B	black	UniprotAccessions-black_DINCH_1_d_strict_GS4_MM4	3	Cluster 2	O75396	vs_LPS	MINCH	6	4h_MINCH_100nM	***	black_DINCH_1_d
69	4h_MINCH_100nM_ctrlLPS	-0.135697828337031	0.00145726754188627	CNPY3	black	UniprotAccessions-black_DINCH_1_d_strict_GS4_MM4	1	Cluster 2	Q9BT09	vs_LPS	MINCH	6	4h_MINCH_100nM	**	black_DINCH_1_d
64	4h_MINCH_1000nM_ctrlLPS	-0.153911921869281	0.058011050669261	NQO1	black	UniprotAccessions-black_DINCH_1_d_strict_GS4_MM4	2	Cluster 1	B4DLR8	vs_LPS	MINCH	7	4h_MINCH_1000nM		black_DINCH_1_d
65	4h_MINCH_1000nM_ctrlLPS	-0.0421252749716497	0.181251567740299	SEC22B	black	UniprotAccessions-black_DINCH_1_d_strict_GS4_MM4	3	Cluster 2	O75396	vs_LPS	MINCH	7	4h_MINCH_1000nM		black_DINCH_1_d
66	4h_MINCH_1000nM_ctrlLPS	-0.128568945391481	0.141110416324527	CNPY3	black	UniprotAccessions-black_DINCH_1_d_strict_GS4_MM4	1	Cluster 2	Q9BT09	vs_LPS	MINCH	7	4h_MINCH_1000nM		black_DINCH_1_d
61	4h_MINCH_10000nM_ctrlLPS	-0.275885646675737	0.000168736331921315	NQO1	black	UniprotAccessions-black_DINCH_1_d_strict_GS4_MM4	2	Cluster 1	B4DLR8	vs_LPS	MINCH	8	4h_MINCH_10000nM	***	black_DINCH_1_d
62	4h_MINCH_10000nM_ctrlLPS	-0.158394166806329	0.0190371024099774	SEC22B	black	UniprotAccessions-black_DINCH_1_d_strict_GS4_MM4	3	Cluster 2	O75396	vs_LPS	MINCH	8	4h_MINCH_10000nM	*	black_DINCH_1_d
63	4h_MINCH_10000nM_ctrlLPS	-0.174326029519006	3.01569150308908e-06	CNPY3	black	UniprotAccessions-black_DINCH_1_d_strict_GS4_MM4	1	Cluster 2	Q9BT09	vs_LPS	MINCH	8	4h_MINCH_10000nM	***	black_DINCH_1_d
10	16h_DINCH_10nM_ctrlLPS	0.00238474373256253	0.910488947055443	NQO1	black	UniprotAccessions-black_DINCH_1_d_strict_GS4_MM4	2	Cluster 1	B4DLR8	vs_LPS	DINCH	9	16h_DINCH_10nM		black_DINCH_1_d
11	16h_DINCH_10nM_ctrlLPS	-0.0340955865056833	0.215379245627055	SEC22B	black	UniprotAccessions-black_DINCH_1_d_strict_GS4_MM4	3	Cluster 2	O75396	vs_LPS	DINCH	9	16h_DINCH_10nM		black_DINCH_1_d
12	16h_DINCH_10nM_ctrlLPS	0.0367255925506045	0.231605158080995	CNPY3	black	UniprotAccessions-black_DINCH_1_d_strict_GS4_MM4	1	Cluster 2	Q9BT09	vs_LPS	DINCH	9	16h_DINCH_10nM		black_DINCH_1_d
7	16h_DINCH_100nM_ctrlLPS	-0.0754683418447825	0.0913107452373585	NQO1	black	UniprotAccessions-black_DINCH_1_d_strict_GS4_MM4	2	Cluster 1	B4DLR8	vs_LPS	DINCH	10	16h_DINCH_100nM		black_DINCH_1_d
8	16h_DINCH_100nM_ctrlLPS	-0.0943124477694835	0.0159048652415093	SEC22B	black	UniprotAccessions-black_DINCH_1_d_strict_GS4_MM4	3	Cluster 2	O75396	vs_LPS	DINCH	10	16h_DINCH_100nM	*	black_DINCH_1_d
9	16h_DINCH_100nM_ctrlLPS	-0.0547917360473654	0.164936997012941	CNPY3	black	UniprotAccessions-black_DINCH_1_d_strict_GS4_MM4	1	Cluster 2	Q9BT09	vs_LPS	DINCH	10	16h_DINCH_100nM		black_DINCH_1_d
4	16h_DINCH_1000nM_ctrlLPS	-0.000415168895884471	0.987692945729222	NQO1	black	UniprotAccessions-black_DINCH_1_d_strict_GS4_MM4	2	Cluster 1	B4DLR8	vs_LPS	DINCH	11	16h_DINCH_1000nM		black_DINCH_1_d
5	16h_DINCH_1000nM_ctrlLPS	-0.0565122707077525	0.113892515407598	SEC22B	black	UniprotAccessions-black_DINCH_1_d_strict_GS4_MM4	3	Cluster 2	O75396	vs_LPS	DINCH	11	16h_DINCH_1000nM		black_DINCH_1_d
6	16h_DINCH_1000nM_ctrlLPS	0.0633380272596303	0.291186676267949	CNPY3	black	UniprotAccessions-black_DINCH_1_d_strict_GS4_MM4	1	Cluster 2	Q9BT09	vs_LPS	DINCH	11	16h_DINCH_1000nM		black_DINCH_1_d
1	16h_DINCH_10000nM_ctrlLPS	-0.065126994031685	0.471225532693451	NQO1	black	UniprotAccessions-black_DINCH_1_d_strict_GS4_MM4	2	Cluster 1	B4DLR8	vs_LPS	DINCH	12	16h_DINCH_10000nM		black_DINCH_1_d
2	16h_DINCH_10000nM_ctrlLPS	-0.0443962497024822	0.535376146937453	SEC22B	black	UniprotAccessions-black_DINCH_1_d_strict_GS4_MM4	3	Cluster 2	O75396	vs_LPS	DINCH	12	16h_DINCH_10000nM		black_DINCH_1_d
3	16h_DINCH_10000nM_ctrlLPS	-0.0275603836797646	0.733464653740461	CNPY3	black	UniprotAccessions-black_DINCH_1_d_strict_GS4_MM4	1	Cluster 2	Q9BT09	vs_LPS	DINCH	12	16h_DINCH_10000nM		black_DINCH_1_d
22	16h_MINCH_10nM_ctrlLPS	-0.181900621848508	0.00877127982689361	NQO1	black	UniprotAccessions-black_DINCH_1_d_strict_GS4_MM4	2	Cluster 1	B4DLR8	vs_LPS	MINCH	13	16h_MINCH_10nM	**	black_DINCH_1_d
23	16h_MINCH_10nM_ctrlLPS	-0.140892749983101	0.0135658211278556	SEC22B	black	UniprotAccessions-black_DINCH_1_d_strict_GS4_MM4	3	Cluster 2	O75396	vs_LPS	MINCH	13	16h_MINCH_10nM	*	black_DINCH_1_d
24	16h_MINCH_10nM_ctrlLPS	-0.124906353191664	0.0156428462280464	CNPY3	black	UniprotAccessions-black_DINCH_1_d_strict_GS4_MM4	1	Cluster 2	Q9BT09	vs_LPS	MINCH	13	16h_MINCH_10nM	*	black_DINCH_1_d
19	16h_MINCH_100nM_ctrlLPS	-0.188509756363232	0.00573100556828406	NQO1	black	UniprotAccessions-black_DINCH_1_d_strict_GS4_MM4	2	Cluster 1	B4DLR8	vs_LPS	MINCH	14	16h_MINCH_100nM	**	black_DINCH_1_d
20	16h_MINCH_100nM_ctrlLPS	-0.110349342287377	0.0617517225465696	SEC22B	black	UniprotAccessions-black_DINCH_1_d_strict_GS4_MM4	3	Cluster 2	O75396	vs_LPS	MINCH	14	16h_MINCH_100nM		black_DINCH_1_d
21	16h_MINCH_100nM_ctrlLPS	-0.0580001409278772	0.281509455571272	CNPY3	black	UniprotAccessions-black_DINCH_1_d_strict_GS4_MM4	1	Cluster 2	Q9BT09	vs_LPS	MINCH	14	16h_MINCH_100nM		black_DINCH_1_d
16	16h_MINCH_1000nM_ctrlLPS	-0.162741672406132	0.00713029939561141	NQO1	black	UniprotAccessions-black_DINCH_1_d_strict_GS4_MM4	2	Cluster 1	B4DLR8	vs_LPS	MINCH	15	16h_MINCH_1000nM	**	black_DINCH_1_d
17	16h_MINCH_1000nM_ctrlLPS	-0.125474404083248	0.0948969821370637	SEC22B	black	UniprotAccessions-black_DINCH_1_d_strict_GS4_MM4	3	Cluster 2	O75396	vs_LPS	MINCH	15	16h_MINCH_1000nM		black_DINCH_1_d
18	16h_MINCH_1000nM_ctrlLPS	-0.075354177043805	0.216459668864062	CNPY3	black	UniprotAccessions-black_DINCH_1_d_strict_GS4_MM4	1	Cluster 2	Q9BT09	vs_LPS	MINCH	15	16h_MINCH_1000nM		black_DINCH_1_d
13	16h_MINCH_10000nM_ctrlLPS	-0.141050730232571	0.104827597714794	NQO1	black	UniprotAccessions-black_DINCH_1_d_strict_GS4_MM4	2	Cluster 1	B4DLR8	vs_LPS	MINCH	16	16h_MINCH_10000nM		black_DINCH_1_d
14	16h_MINCH_10000nM_ctrlLPS	-0.105620489617414	0.186902470233785	SEC22B	black	UniprotAccessions-black_DINCH_1_d_strict_GS4_MM4	3	Cluster 2	O75396	vs_LPS	MINCH	16	16h_MINCH_10000nM		black_DINCH_1_d
15	16h_MINCH_10000nM_ctrlLPS	-0.029801662257965	0.451908399216602	CNPY3	black	UniprotAccessions-black_DINCH_1_d_strict_GS4_MM4	1	Cluster 2	Q9BT09	vs_LPS	MINCH	16	16h_MINCH_10000nM		black_DINCH_1_d
34	1d_DINCH_10nM_ctrlLPS	-0.0206372043663563	0.491643344910765	NQO1	black	UniprotAccessions-black_DINCH_1_d_strict_GS4_MM4	2	Cluster 1	B4DLR8	vs_LPS	DINCH	17	1d_DINCH_10nM		black_DINCH_1_d
35	1d_DINCH_10nM_ctrlLPS	0.00630818581147948	0.676618042705764	SEC22B	black	UniprotAccessions-black_DINCH_1_d_strict_GS4_MM4	3	Cluster 2	O75396	vs_LPS	DINCH	17	1d_DINCH_10nM		black_DINCH_1_d
36	1d_DINCH_10nM_ctrlLPS	0.00270145619755581	0.742335705812836	CNPY3	black	UniprotAccessions-black_DINCH_1_d_strict_GS4_MM4	1	Cluster 2	Q9BT09	vs_LPS	DINCH	17	1d_DINCH_10nM		black_DINCH_1_d
31	1d_DINCH_100nM_ctrlLPS	0.0646312011563703	0.000348143273386973	NQO1	black	UniprotAccessions-black_DINCH_1_d_strict_GS4_MM4	2	Cluster 1	B4DLR8	vs_LPS	DINCH	18	1d_DINCH_100nM	***	black_DINCH_1_d
32	1d_DINCH_100nM_ctrlLPS	0.0334366408991716	0.0236864303940569	SEC22B	black	UniprotAccessions-black_DINCH_1_d_strict_GS4_MM4	3	Cluster 2	O75396	vs_LPS	DINCH	18	1d_DINCH_100nM	*	black_DINCH_1_d
33	1d_DINCH_100nM_ctrlLPS	0.0640087944583307	0.011291335118523	CNPY3	black	UniprotAccessions-black_DINCH_1_d_strict_GS4_MM4	1	Cluster 2	Q9BT09	vs_LPS	DINCH	18	1d_DINCH_100nM	*	black_DINCH_1_d
28	1d_DINCH_1000nM_ctrlLPS	0.0539756254146486	0.00209446882272385	NQO1	black	UniprotAccessions-black_DINCH_1_d_strict_GS4_MM4	2	Cluster 1	B4DLR8	vs_LPS	DINCH	19	1d_DINCH_1000nM	**	black_DINCH_1_d
29	1d_DINCH_1000nM_ctrlLPS	0.0568775690809524	0.15086653876192	SEC22B	black	UniprotAccessions-black_DINCH_1_d_strict_GS4_MM4	3	Cluster 2	O75396	vs_LPS	DINCH	19	1d_DINCH_1000nM		black_DINCH_1_d
30	1d_DINCH_1000nM_ctrlLPS	0.115082669401998	0.000156864974435162	CNPY3	black	UniprotAccessions-black_DINCH_1_d_strict_GS4_MM4	1	Cluster 2	Q9BT09	vs_LPS	DINCH	19	1d_DINCH_1000nM	***	black_DINCH_1_d
25	1d_DINCH_10000nM_ctrlLPS	-0.0763459620746868	0.00581880885249841	NQO1	black	UniprotAccessions-black_DINCH_1_d_strict_GS4_MM4	2	Cluster 1	B4DLR8	vs_LPS	DINCH	20	1d_DINCH_10000nM	**	black_DINCH_1_d
26	1d_DINCH_10000nM_ctrlLPS	-0.0200707510524837	0.432911381565333	SEC22B	black	UniprotAccessions-black_DINCH_1_d_strict_GS4_MM4	3	Cluster 2	O75396	vs_LPS	DINCH	20	1d_DINCH_10000nM		black_DINCH_1_d
27	1d_DINCH_10000nM_ctrlLPS	-0.00331021326624016	0.872599319485386	CNPY3	black	UniprotAccessions-black_DINCH_1_d_strict_GS4_MM4	1	Cluster 2	Q9BT09	vs_LPS	DINCH	20	1d_DINCH_10000nM		black_DINCH_1_d
46	1d_MINCH_10nM_ctrlLPS	-0.0413968839789063	0.000136253689962055	NQO1	black	UniprotAccessions-black_DINCH_1_d_strict_GS4_MM4	2	Cluster 1	B4DLR8	vs_LPS	MINCH	21	1d_MINCH_10nM	***	black_DINCH_1_d
47	1d_MINCH_10nM_ctrlLPS	-0.0157643820225896	0.451097104434395	SEC22B	black	UniprotAccessions-black_DINCH_1_d_strict_GS4_MM4	3	Cluster 2	O75396	vs_LPS	MINCH	21	1d_MINCH_10nM		black_DINCH_1_d
48	1d_MINCH_10nM_ctrlLPS	-0.0507927429794182	0.0406975738064354	CNPY3	black	UniprotAccessions-black_DINCH_1_d_strict_GS4_MM4	1	Cluster 2	Q9BT09	vs_LPS	MINCH	21	1d_MINCH_10nM	*	black_DINCH_1_d
43	1d_MINCH_100nM_ctrlLPS	-0.0261952269230215	0.24328004184069	NQO1	black	UniprotAccessions-black_DINCH_1_d_strict_GS4_MM4	2	Cluster 1	B4DLR8	vs_LPS	MINCH	22	1d_MINCH_100nM		black_DINCH_1_d
44	1d_MINCH_100nM_ctrlLPS	0.000987462012024867	0.916821965204383	SEC22B	black	UniprotAccessions-black_DINCH_1_d_strict_GS4_MM4	3	Cluster 2	O75396	vs_LPS	MINCH	22	1d_MINCH_100nM		black_DINCH_1_d
45	1d_MINCH_100nM_ctrlLPS	0.0358590451916871	0.151907821241337	CNPY3	black	UniprotAccessions-black_DINCH_1_d_strict_GS4_MM4	1	Cluster 2	Q9BT09	vs_LPS	MINCH	22	1d_MINCH_100nM		black_DINCH_1_d
40	1d_MINCH_1000nM_ctrlLPS	-0.0603428010930697	0.0016527774626702	NQO1	black	UniprotAccessions-black_DINCH_1_d_strict_GS4_MM4	2	Cluster 1	B4DLR8	vs_LPS	MINCH	23	1d_MINCH_1000nM	**	black_DINCH_1_d
41	1d_MINCH_1000nM_ctrlLPS	-0.0298597977734335	0.0724989631283384	SEC22B	black	UniprotAccessions-black_DINCH_1_d_strict_GS4_MM4	3	Cluster 2	O75396	vs_LPS	MINCH	23	1d_MINCH_1000nM		black_DINCH_1_d
42	1d_MINCH_1000nM_ctrlLPS	-0.0485829684156688	0.099211380256548	CNPY3	black	UniprotAccessions-black_DINCH_1_d_strict_GS4_MM4	1	Cluster 2	Q9BT09	vs_LPS	MINCH	23	1d_MINCH_1000nM		black_DINCH_1_d
37	1d_MINCH_10000nM_ctrlLPS	-0.0692561599236615	0.00127589877208313	NQO1	black	UniprotAccessions-black_DINCH_1_d_strict_GS4_MM4	2	Cluster 1	B4DLR8	vs_LPS	MINCH	24	1d_MINCH_10000nM	**	black_DINCH_1_d
38	1d_MINCH_10000nM_ctrlLPS	-0.0362820315852689	0.0614989114930484	SEC22B	black	UniprotAccessions-black_DINCH_1_d_strict_GS4_MM4	3	Cluster 2	O75396	vs_LPS	MINCH	24	1d_MINCH_10000nM		black_DINCH_1_d
39	1d_MINCH_10000nM_ctrlLPS	-0.0494290811077606	0.188173425849048	CNPY3	black	UniprotAccessions-black_DINCH_1_d_strict_GS4_MM4	1	Cluster 2	Q9BT09	vs_LPS	MINCH	24	1d_MINCH_10000nM		black_DINCH_1_d
210	4h_DINCH_10nM_ctrlLPS	NA	NA	RAD21	blue	UniprotAccessions-blue_MINCH_1_d_strict_GS4_MM4	5	Cluster 1	O60216	vs_LPS	DINCH	1	4h_DINCH_10nM		blue_MINCH_1_d
211	4h_DINCH_10nM_ctrlLPS	0.0599294185583131	0.0954210205769826	LIMS1	blue	UniprotAccessions-blue_MINCH_1_d_strict_GS4_MM4	8	Cluster 2	P48059	vs_LPS	DINCH	1	4h_DINCH_10nM		blue_MINCH_1_d
212	4h_DINCH_10nM_ctrlLPS	0.00175297066733984	0.925403473672118	MEF2D	blue	UniprotAccessions-blue_MINCH_1_d_strict_GS4_MM4	2	Cluster 2	Q05BX2	vs_LPS	DINCH	1	4h_DINCH_10nM		blue_MINCH_1_d
213	4h_DINCH_10nM_ctrlLPS	NA	NA	EP300	blue	UniprotAccessions-blue_MINCH_1_d_strict_GS4_MM4	6	Cluster 1	Q09472	vs_LPS	DINCH	1	4h_DINCH_10nM		blue_MINCH_1_d
214	4h_DINCH_10nM_ctrlLPS	0.0219962605264769	0.502749221610748	NNT	blue	UniprotAccessions-blue_MINCH_1_d_strict_GS4_MM4	3	Cluster 2	Q13423	vs_LPS	DINCH	1	4h_DINCH_10nM		blue_MINCH_1_d
215	4h_DINCH_10nM_ctrlLPS	0.0635103390916947	0.0592584707896008	SLC25A24	blue	UniprotAccessions-blue_MINCH_1_d_strict_GS4_MM4	7	Cluster 2	Q6NUK1	vs_LPS	DINCH	1	4h_DINCH_10nM		blue_MINCH_1_d
216	4h_DINCH_10nM_ctrlLPS	0.161156203252344	0.244486101054593	MRPS31	blue	UniprotAccessions-blue_MINCH_1_d_strict_GS4_MM4	11	Cluster 2	Q92665	vs_LPS	DINCH	1	4h_DINCH_10nM		blue_MINCH_1_d
217	4h_DINCH_10nM_ctrlLPS	0.0557646521624178	0.0987922872108001	PGM2	blue	UniprotAccessions-blue_MINCH_1_d_strict_GS4_MM4	10	Cluster 2	Q96G03	vs_LPS	DINCH	1	4h_DINCH_10nM		blue_MINCH_1_d
218	4h_DINCH_10nM_ctrlLPS	NA	NA	EGLN1	blue	UniprotAccessions-blue_MINCH_1_d_strict_GS4_MM4	4	Cluster 1	Q9GZT9	vs_LPS	DINCH	1	4h_DINCH_10nM		blue_MINCH_1_d
219	4h_DINCH_10nM_ctrlLPS	0.120890458068148	0.34544709778517	RGCC	blue	UniprotAccessions-blue_MINCH_1_d_strict_GS4_MM4	9	Cluster 2	Q9H4X1	vs_LPS	DINCH	1	4h_DINCH_10nM		blue_MINCH_1_d
220	4h_DINCH_10nM_ctrlLPS	0.139972785016814	0.270098537637634	MCTS1	blue	UniprotAccessions-blue_MINCH_1_d_strict_GS4_MM4	1	Cluster 2	Q9ULC4	vs_LPS	DINCH	1	4h_DINCH_10nM		blue_MINCH_1_d
199	4h_DINCH_100nM_ctrlLPS	NA	NA	RAD21	blue	UniprotAccessions-blue_MINCH_1_d_strict_GS4_MM4	5	Cluster 1	O60216	vs_LPS	DINCH	2	4h_DINCH_100nM		blue_MINCH_1_d
200	4h_DINCH_100nM_ctrlLPS	0.101289976938814	0.0859739246589093	LIMS1	blue	UniprotAccessions-blue_MINCH_1_d_strict_GS4_MM4	8	Cluster 2	P48059	vs_LPS	DINCH	2	4h_DINCH_100nM		blue_MINCH_1_d
201	4h_DINCH_100nM_ctrlLPS	0.125591649265828	0.0175096601229116	MEF2D	blue	UniprotAccessions-blue_MINCH_1_d_strict_GS4_MM4	2	Cluster 2	Q05BX2	vs_LPS	DINCH	2	4h_DINCH_100nM	*	blue_MINCH_1_d
202	4h_DINCH_100nM_ctrlLPS	NA	NA	EP300	blue	UniprotAccessions-blue_MINCH_1_d_strict_GS4_MM4	6	Cluster 1	Q09472	vs_LPS	DINCH	2	4h_DINCH_100nM		blue_MINCH_1_d
203	4h_DINCH_100nM_ctrlLPS	0.0472763948630705	0.30403101639143	NNT	blue	UniprotAccessions-blue_MINCH_1_d_strict_GS4_MM4	3	Cluster 2	Q13423	vs_LPS	DINCH	2	4h_DINCH_100nM		blue_MINCH_1_d
204	4h_DINCH_100nM_ctrlLPS	0.0687343860763799	0.117406237392619	SLC25A24	blue	UniprotAccessions-blue_MINCH_1_d_strict_GS4_MM4	7	Cluster 2	Q6NUK1	vs_LPS	DINCH	2	4h_DINCH_100nM		blue_MINCH_1_d
205	4h_DINCH_100nM_ctrlLPS	0.0787973590604001	0.345561876459752	MRPS31	blue	UniprotAccessions-blue_MINCH_1_d_strict_GS4_MM4	11	Cluster 2	Q92665	vs_LPS	DINCH	2	4h_DINCH_100nM		blue_MINCH_1_d
206	4h_DINCH_100nM_ctrlLPS	0.0145362383179675	0.503174690345235	PGM2	blue	UniprotAccessions-blue_MINCH_1_d_strict_GS4_MM4	10	Cluster 2	Q96G03	vs_LPS	DINCH	2	4h_DINCH_100nM		blue_MINCH_1_d
207	4h_DINCH_100nM_ctrlLPS	NA	NA	EGLN1	blue	UniprotAccessions-blue_MINCH_1_d_strict_GS4_MM4	4	Cluster 1	Q9GZT9	vs_LPS	DINCH	2	4h_DINCH_100nM		blue_MINCH_1_d
208	4h_DINCH_100nM_ctrlLPS	0.0377599039546035	0.674821935273112	RGCC	blue	UniprotAccessions-blue_MINCH_1_d_strict_GS4_MM4	9	Cluster 2	Q9H4X1	vs_LPS	DINCH	2	4h_DINCH_100nM		blue_MINCH_1_d
209	4h_DINCH_100nM_ctrlLPS	0.16428909903604	0.278023791218993	MCTS1	blue	UniprotAccessions-blue_MINCH_1_d_strict_GS4_MM4	1	Cluster 2	Q9ULC4	vs_LPS	DINCH	2	4h_DINCH_100nM		blue_MINCH_1_d
188	4h_DINCH_1000nM_ctrlLPS	NA	NA	RAD21	blue	UniprotAccessions-blue_MINCH_1_d_strict_GS4_MM4	5	Cluster 1	O60216	vs_LPS	DINCH	3	4h_DINCH_1000nM		blue_MINCH_1_d
189	4h_DINCH_1000nM_ctrlLPS	0.101532991631258	0.00350547050749205	LIMS1	blue	UniprotAccessions-blue_MINCH_1_d_strict_GS4_MM4	8	Cluster 2	P48059	vs_LPS	DINCH	3	4h_DINCH_1000nM	**	blue_MINCH_1_d
190	4h_DINCH_1000nM_ctrlLPS	0.0905315706601452	0.179961799269873	MEF2D	blue	UniprotAccessions-blue_MINCH_1_d_strict_GS4_MM4	2	Cluster 2	Q05BX2	vs_LPS	DINCH	3	4h_DINCH_1000nM		blue_MINCH_1_d
191	4h_DINCH_1000nM_ctrlLPS	NA	NA	EP300	blue	UniprotAccessions-blue_MINCH_1_d_strict_GS4_MM4	6	Cluster 1	Q09472	vs_LPS	DINCH	3	4h_DINCH_1000nM		blue_MINCH_1_d
192	4h_DINCH_1000nM_ctrlLPS	0.0274433868011402	0.4959786836367	NNT	blue	UniprotAccessions-blue_MINCH_1_d_strict_GS4_MM4	3	Cluster 2	Q13423	vs_LPS	DINCH	3	4h_DINCH_1000nM		blue_MINCH_1_d
193	4h_DINCH_1000nM_ctrlLPS	0.0764100127704515	0.0651781838066861	SLC25A24	blue	UniprotAccessions-blue_MINCH_1_d_strict_GS4_MM4	7	Cluster 2	Q6NUK1	vs_LPS	DINCH	3	4h_DINCH_1000nM		blue_MINCH_1_d
194	4h_DINCH_1000nM_ctrlLPS	0.153330249609548	0.160627361635058	MRPS31	blue	UniprotAccessions-blue_MINCH_1_d_strict_GS4_MM4	11	Cluster 2	Q92665	vs_LPS	DINCH	3	4h_DINCH_1000nM		blue_MINCH_1_d
195	4h_DINCH_1000nM_ctrlLPS	0.00275639082720254	0.749754523082888	PGM2	blue	UniprotAccessions-blue_MINCH_1_d_strict_GS4_MM4	10	Cluster 2	Q96G03	vs_LPS	DINCH	3	4h_DINCH_1000nM		blue_MINCH_1_d
196	4h_DINCH_1000nM_ctrlLPS	NA	NA	EGLN1	blue	UniprotAccessions-blue_MINCH_1_d_strict_GS4_MM4	4	Cluster 1	Q9GZT9	vs_LPS	DINCH	3	4h_DINCH_1000nM		blue_MINCH_1_d
197	4h_DINCH_1000nM_ctrlLPS	0.0945381643352553	0.222980639096272	RGCC	blue	UniprotAccessions-blue_MINCH_1_d_strict_GS4_MM4	9	Cluster 2	Q9H4X1	vs_LPS	DINCH	3	4h_DINCH_1000nM		blue_MINCH_1_d
198	4h_DINCH_1000nM_ctrlLPS	0.182185028867552	0.181776392345116	MCTS1	blue	UniprotAccessions-blue_MINCH_1_d_strict_GS4_MM4	1	Cluster 2	Q9ULC4	vs_LPS	DINCH	3	4h_DINCH_1000nM		blue_MINCH_1_d
177	4h_DINCH_10000nM_ctrlLPS	NA	NA	RAD21	blue	UniprotAccessions-blue_MINCH_1_d_strict_GS4_MM4	5	Cluster 1	O60216	vs_LPS	DINCH	4	4h_DINCH_10000nM		blue_MINCH_1_d
178	4h_DINCH_10000nM_ctrlLPS	0.0860092435308225	0.0293863934242613	LIMS1	blue	UniprotAccessions-blue_MINCH_1_d_strict_GS4_MM4	8	Cluster 2	P48059	vs_LPS	DINCH	4	4h_DINCH_10000nM	*	blue_MINCH_1_d
179	4h_DINCH_10000nM_ctrlLPS	0.115818917778643	0.100931175235355	MEF2D	blue	UniprotAccessions-blue_MINCH_1_d_strict_GS4_MM4	2	Cluster 2	Q05BX2	vs_LPS	DINCH	4	4h_DINCH_10000nM		blue_MINCH_1_d
180	4h_DINCH_10000nM_ctrlLPS	NA	NA	EP300	blue	UniprotAccessions-blue_MINCH_1_d_strict_GS4_MM4	6	Cluster 1	Q09472	vs_LPS	DINCH	4	4h_DINCH_10000nM		blue_MINCH_1_d
181	4h_DINCH_10000nM_ctrlLPS	0.0189257763287593	0.60124065808391	NNT	blue	UniprotAccessions-blue_MINCH_1_d_strict_GS4_MM4	3	Cluster 2	Q13423	vs_LPS	DINCH	4	4h_DINCH_10000nM		blue_MINCH_1_d
182	4h_DINCH_10000nM_ctrlLPS	0.092845303281283	0.0541035069115979	SLC25A24	blue	UniprotAccessions-blue_MINCH_1_d_strict_GS4_MM4	7	Cluster 2	Q6NUK1	vs_LPS	DINCH	4	4h_DINCH_10000nM		blue_MINCH_1_d
183	4h_DINCH_10000nM_ctrlLPS	0.064385704086943	0.422674706956115	MRPS31	blue	UniprotAccessions-blue_MINCH_1_d_strict_GS4_MM4	11	Cluster 2	Q92665	vs_LPS	DINCH	4	4h_DINCH_10000nM		blue_MINCH_1_d
184	4h_DINCH_10000nM_ctrlLPS	-0.0240947868214674	0.352522991518712	PGM2	blue	UniprotAccessions-blue_MINCH_1_d_strict_GS4_MM4	10	Cluster 2	Q96G03	vs_LPS	DINCH	4	4h_DINCH_10000nM		blue_MINCH_1_d
185	4h_DINCH_10000nM_ctrlLPS	NA	NA	EGLN1	blue	UniprotAccessions-blue_MINCH_1_d_strict_GS4_MM4	4	Cluster 1	Q9GZT9	vs_LPS	DINCH	4	4h_DINCH_10000nM		blue_MINCH_1_d
186	4h_DINCH_10000nM_ctrlLPS	-5.1177521066207e-06	0.99995003573543	RGCC	blue	UniprotAccessions-blue_MINCH_1_d_strict_GS4_MM4	9	Cluster 2	Q9H4X1	vs_LPS	DINCH	4	4h_DINCH_10000nM		blue_MINCH_1_d
187	4h_DINCH_10000nM_ctrlLPS	0.196537660531699	0.153901776183981	MCTS1	blue	UniprotAccessions-blue_MINCH_1_d_strict_GS4_MM4	1	Cluster 2	Q9ULC4	vs_LPS	DINCH	4	4h_DINCH_10000nM		blue_MINCH_1_d
254	4h_MINCH_10nM_ctrlLPS	NA	NA	RAD21	blue	UniprotAccessions-blue_MINCH_1_d_strict_GS4_MM4	5	Cluster 1	O60216	vs_LPS	MINCH	5	4h_MINCH_10nM		blue_MINCH_1_d
255	4h_MINCH_10nM_ctrlLPS	0.036983997946461	0.507621385046474	LIMS1	blue	UniprotAccessions-blue_MINCH_1_d_strict_GS4_MM4	8	Cluster 2	P48059	vs_LPS	MINCH	5	4h_MINCH_10nM		blue_MINCH_1_d
256	4h_MINCH_10nM_ctrlLPS	0.0473528511685013	0.188663151201489	MEF2D	blue	UniprotAccessions-blue_MINCH_1_d_strict_GS4_MM4	2	Cluster 2	Q05BX2	vs_LPS	MINCH	5	4h_MINCH_10nM		blue_MINCH_1_d
257	4h_MINCH_10nM_ctrlLPS	NA	NA	EP300	blue	UniprotAccessions-blue_MINCH_1_d_strict_GS4_MM4	6	Cluster 1	Q09472	vs_LPS	MINCH	5	4h_MINCH_10nM		blue_MINCH_1_d
258	4h_MINCH_10nM_ctrlLPS	-0.00675876233852721	0.834384491248197	NNT	blue	UniprotAccessions-blue_MINCH_1_d_strict_GS4_MM4	3	Cluster 2	Q13423	vs_LPS	MINCH	5	4h_MINCH_10nM		blue_MINCH_1_d
259	4h_MINCH_10nM_ctrlLPS	0.0284858775291501	0.392611835123931	SLC25A24	blue	UniprotAccessions-blue_MINCH_1_d_strict_GS4_MM4	7	Cluster 2	Q6NUK1	vs_LPS	MINCH	5	4h_MINCH_10nM		blue_MINCH_1_d
260	4h_MINCH_10nM_ctrlLPS	0.114218246562215	0.0873926271922793	MRPS31	blue	UniprotAccessions-blue_MINCH_1_d_strict_GS4_MM4	11	Cluster 2	Q92665	vs_LPS	MINCH	5	4h_MINCH_10nM		blue_MINCH_1_d
261	4h_MINCH_10nM_ctrlLPS	-0.00847019151134109	0.670779649197036	PGM2	blue	UniprotAccessions-blue_MINCH_1_d_strict_GS4_MM4	10	Cluster 2	Q96G03	vs_LPS	MINCH	5	4h_MINCH_10nM		blue_MINCH_1_d
262	4h_MINCH_10nM_ctrlLPS	NA	NA	EGLN1	blue	UniprotAccessions-blue_MINCH_1_d_strict_GS4_MM4	4	Cluster 1	Q9GZT9	vs_LPS	MINCH	5	4h_MINCH_10nM		blue_MINCH_1_d
263	4h_MINCH_10nM_ctrlLPS	0.120498358462811	0.260189432993177	RGCC	blue	UniprotAccessions-blue_MINCH_1_d_strict_GS4_MM4	9	Cluster 2	Q9H4X1	vs_LPS	MINCH	5	4h_MINCH_10nM		blue_MINCH_1_d
264	4h_MINCH_10nM_ctrlLPS	0.0335112531858393	0.021104652729283	MCTS1	blue	UniprotAccessions-blue_MINCH_1_d_strict_GS4_MM4	1	Cluster 2	Q9ULC4	vs_LPS	MINCH	5	4h_MINCH_10nM	*	blue_MINCH_1_d
243	4h_MINCH_100nM_ctrlLPS	NA	NA	RAD21	blue	UniprotAccessions-blue_MINCH_1_d_strict_GS4_MM4	5	Cluster 1	O60216	vs_LPS	MINCH	6	4h_MINCH_100nM		blue_MINCH_1_d
244	4h_MINCH_100nM_ctrlLPS	0.00827798213612546	0.899136190680927	LIMS1	blue	UniprotAccessions-blue_MINCH_1_d_strict_GS4_MM4	8	Cluster 2	P48059	vs_LPS	MINCH	6	4h_MINCH_100nM		blue_MINCH_1_d
245	4h_MINCH_100nM_ctrlLPS	0.0375729756046872	0.274447634064407	MEF2D	blue	UniprotAccessions-blue_MINCH_1_d_strict_GS4_MM4	2	Cluster 2	Q05BX2	vs_LPS	MINCH	6	4h_MINCH_100nM		blue_MINCH_1_d
246	4h_MINCH_100nM_ctrlLPS	NA	NA	EP300	blue	UniprotAccessions-blue_MINCH_1_d_strict_GS4_MM4	6	Cluster 1	Q09472	vs_LPS	MINCH	6	4h_MINCH_100nM		blue_MINCH_1_d
247	4h_MINCH_100nM_ctrlLPS	-0.0424653314939902	0.136356400854635	NNT	blue	UniprotAccessions-blue_MINCH_1_d_strict_GS4_MM4	3	Cluster 2	Q13423	vs_LPS	MINCH	6	4h_MINCH_100nM		blue_MINCH_1_d
248	4h_MINCH_100nM_ctrlLPS	0.0367744498135278	0.348286184504059	SLC25A24	blue	UniprotAccessions-blue_MINCH_1_d_strict_GS4_MM4	7	Cluster 2	Q6NUK1	vs_LPS	MINCH	6	4h_MINCH_100nM		blue_MINCH_1_d
249	4h_MINCH_100nM_ctrlLPS	0.0468177023695937	0.353651049516752	MRPS31	blue	UniprotAccessions-blue_MINCH_1_d_strict_GS4_MM4	11	Cluster 2	Q92665	vs_LPS	MINCH	6	4h_MINCH_100nM		blue_MINCH_1_d
250	4h_MINCH_100nM_ctrlLPS	-0.0163640693491384	0.486631101833698	PGM2	blue	UniprotAccessions-blue_MINCH_1_d_strict_GS4_MM4	10	Cluster 2	Q96G03	vs_LPS	MINCH	6	4h_MINCH_100nM		blue_MINCH_1_d
251	4h_MINCH_100nM_ctrlLPS	NA	NA	EGLN1	blue	UniprotAccessions-blue_MINCH_1_d_strict_GS4_MM4	4	Cluster 1	Q9GZT9	vs_LPS	MINCH	6	4h_MINCH_100nM		blue_MINCH_1_d
252	4h_MINCH_100nM_ctrlLPS	-0.073802557713814	0.285387337302164	RGCC	blue	UniprotAccessions-blue_MINCH_1_d_strict_GS4_MM4	9	Cluster 2	Q9H4X1	vs_LPS	MINCH	6	4h_MINCH_100nM		blue_MINCH_1_d
253	4h_MINCH_100nM_ctrlLPS	0.012347248297229	0.857504351376634	MCTS1	blue	UniprotAccessions-blue_MINCH_1_d_strict_GS4_MM4	1	Cluster 2	Q9ULC4	vs_LPS	MINCH	6	4h_MINCH_100nM		blue_MINCH_1_d
232	4h_MINCH_1000nM_ctrlLPS	NA	NA	RAD21	blue	UniprotAccessions-blue_MINCH_1_d_strict_GS4_MM4	5	Cluster 1	O60216	vs_LPS	MINCH	7	4h_MINCH_1000nM		blue_MINCH_1_d
233	4h_MINCH_1000nM_ctrlLPS	0.023136489338884	0.642092701591388	LIMS1	blue	UniprotAccessions-blue_MINCH_1_d_strict_GS4_MM4	8	Cluster 2	P48059	vs_LPS	MINCH	7	4h_MINCH_1000nM		blue_MINCH_1_d
234	4h_MINCH_1000nM_ctrlLPS	0.15855197791912	0.0329373945741401	MEF2D	blue	UniprotAccessions-blue_MINCH_1_d_strict_GS4_MM4	2	Cluster 2	Q05BX2	vs_LPS	MINCH	7	4h_MINCH_1000nM	*	blue_MINCH_1_d
235	4h_MINCH_1000nM_ctrlLPS	NA	NA	EP300	blue	UniprotAccessions-blue_MINCH_1_d_strict_GS4_MM4	6	Cluster 1	Q09472	vs_LPS	MINCH	7	4h_MINCH_1000nM		blue_MINCH_1_d
236	4h_MINCH_1000nM_ctrlLPS	-0.0603307099755814	0.203013922128862	NNT	blue	UniprotAccessions-blue_MINCH_1_d_strict_GS4_MM4	3	Cluster 2	Q13423	vs_LPS	MINCH	7	4h_MINCH_1000nM		blue_MINCH_1_d
237	4h_MINCH_1000nM_ctrlLPS	0.0639245931631072	0.0966366999025751	SLC25A24	blue	UniprotAccessions-blue_MINCH_1_d_strict_GS4_MM4	7	Cluster 2	Q6NUK1	vs_LPS	MINCH	7	4h_MINCH_1000nM		blue_MINCH_1_d
238	4h_MINCH_1000nM_ctrlLPS	0.126348802571775	0.0749502176017645	MRPS31	blue	UniprotAccessions-blue_MINCH_1_d_strict_GS4_MM4	11	Cluster 2	Q92665	vs_LPS	MINCH	7	4h_MINCH_1000nM		blue_MINCH_1_d
239	4h_MINCH_1000nM_ctrlLPS	0.00277237330086796	0.920812224045441	PGM2	blue	UniprotAccessions-blue_MINCH_1_d_strict_GS4_MM4	10	Cluster 2	Q96G03	vs_LPS	MINCH	7	4h_MINCH_1000nM		blue_MINCH_1_d
240	4h_MINCH_1000nM_ctrlLPS	NA	NA	EGLN1	blue	UniprotAccessions-blue_MINCH_1_d_strict_GS4_MM4	4	Cluster 1	Q9GZT9	vs_LPS	MINCH	7	4h_MINCH_1000nM		blue_MINCH_1_d
241	4h_MINCH_1000nM_ctrlLPS	0.0722538371086534	0.397079864929389	RGCC	blue	UniprotAccessions-blue_MINCH_1_d_strict_GS4_MM4	9	Cluster 2	Q9H4X1	vs_LPS	MINCH	7	4h_MINCH_1000nM		blue_MINCH_1_d
242	4h_MINCH_1000nM_ctrlLPS	0.093362858096818	0.409637290158408	MCTS1	blue	UniprotAccessions-blue_MINCH_1_d_strict_GS4_MM4	1	Cluster 2	Q9ULC4	vs_LPS	MINCH	7	4h_MINCH_1000nM		blue_MINCH_1_d
221	4h_MINCH_10000nM_ctrlLPS	NA	NA	RAD21	blue	UniprotAccessions-blue_MINCH_1_d_strict_GS4_MM4	5	Cluster 1	O60216	vs_LPS	MINCH	8	4h_MINCH_10000nM		blue_MINCH_1_d
222	4h_MINCH_10000nM_ctrlLPS	0.088151857076557	0.0575731263201087	LIMS1	blue	UniprotAccessions-blue_MINCH_1_d_strict_GS4_MM4	8	Cluster 2	P48059	vs_LPS	MINCH	8	4h_MINCH_10000nM		blue_MINCH_1_d
223	4h_MINCH_10000nM_ctrlLPS	0.102507339946385	0.0142472286221161	MEF2D	blue	UniprotAccessions-blue_MINCH_1_d_strict_GS4_MM4	2	Cluster 2	Q05BX2	vs_LPS	MINCH	8	4h_MINCH_10000nM	*	blue_MINCH_1_d
224	4h_MINCH_10000nM_ctrlLPS	NA	NA	EP300	blue	UniprotAccessions-blue_MINCH_1_d_strict_GS4_MM4	6	Cluster 1	Q09472	vs_LPS	MINCH	8	4h_MINCH_10000nM		blue_MINCH_1_d
225	4h_MINCH_10000nM_ctrlLPS	-0.026782990754195	0.331398128276027	NNT	blue	UniprotAccessions-blue_MINCH_1_d_strict_GS4_MM4	3	Cluster 2	Q13423	vs_LPS	MINCH	8	4h_MINCH_10000nM		blue_MINCH_1_d
226	4h_MINCH_10000nM_ctrlLPS	0.0625152952423913	0.298417750065149	SLC25A24	blue	UniprotAccessions-blue_MINCH_1_d_strict_GS4_MM4	7	Cluster 2	Q6NUK1	vs_LPS	MINCH	8	4h_MINCH_10000nM		blue_MINCH_1_d
227	4h_MINCH_10000nM_ctrlLPS	-0.00681915327684684	0.95567667979764	MRPS31	blue	UniprotAccessions-blue_MINCH_1_d_strict_GS4_MM4	11	Cluster 2	Q92665	vs_LPS	MINCH	8	4h_MINCH_10000nM		blue_MINCH_1_d
228	4h_MINCH_10000nM_ctrlLPS	0.00511499099435212	0.858206006480314	PGM2	blue	UniprotAccessions-blue_MINCH_1_d_strict_GS4_MM4	10	Cluster 2	Q96G03	vs_LPS	MINCH	8	4h_MINCH_10000nM		blue_MINCH_1_d
229	4h_MINCH_10000nM_ctrlLPS	NA	NA	EGLN1	blue	UniprotAccessions-blue_MINCH_1_d_strict_GS4_MM4	4	Cluster 1	Q9GZT9	vs_LPS	MINCH	8	4h_MINCH_10000nM		blue_MINCH_1_d
230	4h_MINCH_10000nM_ctrlLPS	-0.0213153905287156	0.834378261172919	RGCC	blue	UniprotAccessions-blue_MINCH_1_d_strict_GS4_MM4	9	Cluster 2	Q9H4X1	vs_LPS	MINCH	8	4h_MINCH_10000nM		blue_MINCH_1_d
231	4h_MINCH_10000nM_ctrlLPS	0.147849737674748	0.249759607666742	MCTS1	blue	UniprotAccessions-blue_MINCH_1_d_strict_GS4_MM4	1	Cluster 2	Q9ULC4	vs_LPS	MINCH	8	4h_MINCH_10000nM		blue_MINCH_1_d
3410	16h_DINCH_10nM_ctrlLPS	0.0559887864829634	0.716780023181091	RAD21	blue	UniprotAccessions-blue_MINCH_1_d_strict_GS4_MM4	5	Cluster 1	O60216	vs_LPS	DINCH	9	16h_DINCH_10nM		blue_MINCH_1_d
3510	16h_DINCH_10nM_ctrlLPS	-0.0116789077620008	0.722002788575924	LIMS1	blue	UniprotAccessions-blue_MINCH_1_d_strict_GS4_MM4	8	Cluster 2	P48059	vs_LPS	DINCH	9	16h_DINCH_10nM		blue_MINCH_1_d
3610	16h_DINCH_10nM_ctrlLPS	0.0595827761478612	0.151765618457625	MEF2D	blue	UniprotAccessions-blue_MINCH_1_d_strict_GS4_MM4	2	Cluster 2	Q05BX2	vs_LPS	DINCH	9	16h_DINCH_10nM		blue_MINCH_1_d
3710	16h_DINCH_10nM_ctrlLPS	0.0848356932147529	0.572560729018675	EP300	blue	UniprotAccessions-blue_MINCH_1_d_strict_GS4_MM4	6	Cluster 1	Q09472	vs_LPS	DINCH	9	16h_DINCH_10nM		blue_MINCH_1_d
3810	16h_DINCH_10nM_ctrlLPS	-0.0262695523138151	0.313292848278685	NNT	blue	UniprotAccessions-blue_MINCH_1_d_strict_GS4_MM4	3	Cluster 2	Q13423	vs_LPS	DINCH	9	16h_DINCH_10nM		blue_MINCH_1_d
3910	16h_DINCH_10nM_ctrlLPS	0.0314245262180942	0.282504013563773	SLC25A24	blue	UniprotAccessions-blue_MINCH_1_d_strict_GS4_MM4	7	Cluster 2	Q6NUK1	vs_LPS	DINCH	9	16h_DINCH_10nM		blue_MINCH_1_d
4010	16h_DINCH_10nM_ctrlLPS	-0.0903066478627196	0.0567757506818054	MRPS31	blue	UniprotAccessions-blue_MINCH_1_d_strict_GS4_MM4	11	Cluster 2	Q92665	vs_LPS	DINCH	9	16h_DINCH_10nM		blue_MINCH_1_d
4110	16h_DINCH_10nM_ctrlLPS	-0.00141454456034353	0.953733120845331	PGM2	blue	UniprotAccessions-blue_MINCH_1_d_strict_GS4_MM4	10	Cluster 2	Q96G03	vs_LPS	DINCH	9	16h_DINCH_10nM		blue_MINCH_1_d
4210	16h_DINCH_10nM_ctrlLPS	0.150672806337273	0.0973440443641031	EGLN1	blue	UniprotAccessions-blue_MINCH_1_d_strict_GS4_MM4	4	Cluster 1	Q9GZT9	vs_LPS	DINCH	9	16h_DINCH_10nM		blue_MINCH_1_d
4310	16h_DINCH_10nM_ctrlLPS	-0.0928142257054045	0.0208735731256501	RGCC	blue	UniprotAccessions-blue_MINCH_1_d_strict_GS4_MM4	9	Cluster 2	Q9H4X1	vs_LPS	DINCH	9	16h_DINCH_10nM	*	blue_MINCH_1_d
4410	16h_DINCH_10nM_ctrlLPS	-0.11215018895338	0.0793862715822635	MCTS1	blue	UniprotAccessions-blue_MINCH_1_d_strict_GS4_MM4	1	Cluster 2	Q9ULC4	vs_LPS	DINCH	9	16h_DINCH_10nM		blue_MINCH_1_d
23100	16h_DINCH_100nM_ctrlLPS	0.250748141065184	0.00325565810113312	RAD21	blue	UniprotAccessions-blue_MINCH_1_d_strict_GS4_MM4	5	Cluster 1	O60216	vs_LPS	DINCH	10	16h_DINCH_100nM	**	blue_MINCH_1_d
24100	16h_DINCH_100nM_ctrlLPS	0.00093262674491619	0.953495894966896	LIMS1	blue	UniprotAccessions-blue_MINCH_1_d_strict_GS4_MM4	8	Cluster 2	P48059	vs_LPS	DINCH	10	16h_DINCH_100nM		blue_MINCH_1_d
25100	16h_DINCH_100nM_ctrlLPS	-0.130224292277572	0.0314897827979594	MEF2D	blue	UniprotAccessions-blue_MINCH_1_d_strict_GS4_MM4	2	Cluster 2	Q05BX2	vs_LPS	DINCH	10	16h_DINCH_100nM	*	blue_MINCH_1_d
26100	16h_DINCH_100nM_ctrlLPS	0.121320475619862	0.379456816380469	EP300	blue	UniprotAccessions-blue_MINCH_1_d_strict_GS4_MM4	6	Cluster 1	Q09472	vs_LPS	DINCH	10	16h_DINCH_100nM		blue_MINCH_1_d
2761	16h_DINCH_100nM_ctrlLPS	-0.0213137967224734	0.196347302894221	NNT	blue	UniprotAccessions-blue_MINCH_1_d_strict_GS4_MM4	3	Cluster 2	Q13423	vs_LPS	DINCH	10	16h_DINCH_100nM		blue_MINCH_1_d
2810	16h_DINCH_100nM_ctrlLPS	-0.0238983025886839	0.416705312565436	SLC25A24	blue	UniprotAccessions-blue_MINCH_1_d_strict_GS4_MM4	7	Cluster 2	Q6NUK1	vs_LPS	DINCH	10	16h_DINCH_100nM		blue_MINCH_1_d
2910	16h_DINCH_100nM_ctrlLPS	-0.03182850521022	0.140319415536091	MRPS31	blue	UniprotAccessions-blue_MINCH_1_d_strict_GS4_MM4	11	Cluster 2	Q92665	vs_LPS	DINCH	10	16h_DINCH_100nM		blue_MINCH_1_d
3010	16h_DINCH_100nM_ctrlLPS	-0.0163869576085993	0.263947607343602	PGM2	blue	UniprotAccessions-blue_MINCH_1_d_strict_GS4_MM4	10	Cluster 2	Q96G03	vs_LPS	DINCH	10	16h_DINCH_100nM		blue_MINCH_1_d
3110	16h_DINCH_100nM_ctrlLPS	0.124410222575941	0.128953946346769	EGLN1	blue	UniprotAccessions-blue_MINCH_1_d_strict_GS4_MM4	4	Cluster 1	Q9GZT9	vs_LPS	DINCH	10	16h_DINCH_100nM		blue_MINCH_1_d
3210	16h_DINCH_100nM_ctrlLPS	-0.0589216396073015	0.294599972617861	RGCC	blue	UniprotAccessions-blue_MINCH_1_d_strict_GS4_MM4	9	Cluster 2	Q9H4X1	vs_LPS	DINCH	10	16h_DINCH_100nM		blue_MINCH_1_d
3310	16h_DINCH_100nM_ctrlLPS	-0.0753713998652634	0.197561191521803	MCTS1	blue	UniprotAccessions-blue_MINCH_1_d_strict_GS4_MM4	1	Cluster 2	Q9ULC4	vs_LPS	DINCH	10	16h_DINCH_100nM		blue_MINCH_1_d
12100	16h_DINCH_1000nM_ctrlLPS	0.0581097708456793	0.578593848996775	RAD21	blue	UniprotAccessions-blue_MINCH_1_d_strict_GS4_MM4	5	Cluster 1	O60216	vs_LPS	DINCH	11	16h_DINCH_1000nM		blue_MINCH_1_d
13100	16h_DINCH_1000nM_ctrlLPS	-0.00864844983955564	0.752920104185962	LIMS1	blue	UniprotAccessions-blue_MINCH_1_d_strict_GS4_MM4	8	Cluster 2	P48059	vs_LPS	DINCH	11	16h_DINCH_1000nM		blue_MINCH_1_d
14100	16h_DINCH_1000nM_ctrlLPS	-0.0103586572300821	0.568380246952628	MEF2D	blue	UniprotAccessions-blue_MINCH_1_d_strict_GS4_MM4	2	Cluster 2	Q05BX2	vs_LPS	DINCH	11	16h_DINCH_1000nM		blue_MINCH_1_d
15100	16h_DINCH_1000nM_ctrlLPS	0.152146412623235	0.143909598128147	EP300	blue	UniprotAccessions-blue_MINCH_1_d_strict_GS4_MM4	6	Cluster 1	Q09472	vs_LPS	DINCH	11	16h_DINCH_1000nM		blue_MINCH_1_d
16100	16h_DINCH_1000nM_ctrlLPS	-0.0723714202077654	0.000591338799865903	NNT	blue	UniprotAccessions-blue_MINCH_1_d_strict_GS4_MM4	3	Cluster 2	Q13423	vs_LPS	DINCH	11	16h_DINCH_1000nM	***	blue_MINCH_1_d
17100	16h_DINCH_1000nM_ctrlLPS	0.0762156907375803	0.00132138570181205	SLC25A24	blue	UniprotAccessions-blue_MINCH_1_d_strict_GS4_MM4	7	Cluster 2	Q6NUK1	vs_LPS	DINCH	11	16h_DINCH_1000nM	**	blue_MINCH_1_d
18100	16h_DINCH_1000nM_ctrlLPS	-0.0363855097835897	0.439714917143113	MRPS31	blue	UniprotAccessions-blue_MINCH_1_d_strict_GS4_MM4	11	Cluster 2	Q92665	vs_LPS	DINCH	11	16h_DINCH_1000nM		blue_MINCH_1_d
19100	16h_DINCH_1000nM_ctrlLPS	-0.0199478536935443	0.00953443026827301	PGM2	blue	UniprotAccessions-blue_MINCH_1_d_strict_GS4_MM4	10	Cluster 2	Q96G03	vs_LPS	DINCH	11	16h_DINCH_1000nM	**	blue_MINCH_1_d
20100	16h_DINCH_1000nM_ctrlLPS	-0.023024599672165	0.773825340277835	EGLN1	blue	UniprotAccessions-blue_MINCH_1_d_strict_GS4_MM4	4	Cluster 1	Q9GZT9	vs_LPS	DINCH	11	16h_DINCH_1000nM		blue_MINCH_1_d
21100	16h_DINCH_1000nM_ctrlLPS	-0.0341814025085279	0.589889285688152	RGCC	blue	UniprotAccessions-blue_MINCH_1_d_strict_GS4_MM4	9	Cluster 2	Q9H4X1	vs_LPS	DINCH	11	16h_DINCH_1000nM		blue_MINCH_1_d
22100	16h_DINCH_1000nM_ctrlLPS	-0.108262974013332	0.121163886625383	MCTS1	blue	UniprotAccessions-blue_MINCH_1_d_strict_GS4_MM4	1	Cluster 2	Q9ULC4	vs_LPS	DINCH	11	16h_DINCH_1000nM		blue_MINCH_1_d
11000	16h_DINCH_10000nM_ctrlLPS	0.330867242939787	0.0170234234416218	RAD21	blue	UniprotAccessions-blue_MINCH_1_d_strict_GS4_MM4	5	Cluster 1	O60216	vs_LPS	DINCH	12	16h_DINCH_10000nM	*	blue_MINCH_1_d
2762	16h_DINCH_10000nM_ctrlLPS	-0.0239745574258525	0.441392054191882	LIMS1	blue	UniprotAccessions-blue_MINCH_1_d_strict_GS4_MM4	8	Cluster 2	P48059	vs_LPS	DINCH	12	16h_DINCH_10000nM		blue_MINCH_1_d
3100	16h_DINCH_10000nM_ctrlLPS	-0.0115928234216448	0.491549475449113	MEF2D	blue	UniprotAccessions-blue_MINCH_1_d_strict_GS4_MM4	2	Cluster 2	Q05BX2	vs_LPS	DINCH	12	16h_DINCH_10000nM		blue_MINCH_1_d
4100	16h_DINCH_10000nM_ctrlLPS	0.116741781643775	0.0588522665945854	EP300	blue	UniprotAccessions-blue_MINCH_1_d_strict_GS4_MM4	6	Cluster 1	Q09472	vs_LPS	DINCH	12	16h_DINCH_10000nM		blue_MINCH_1_d
5100	16h_DINCH_10000nM_ctrlLPS	-0.020686214122291	0.315205058020759	NNT	blue	UniprotAccessions-blue_MINCH_1_d_strict_GS4_MM4	3	Cluster 2	Q13423	vs_LPS	DINCH	12	16h_DINCH_10000nM		blue_MINCH_1_d
6100	16h_DINCH_10000nM_ctrlLPS	0.0596659829769016	0.0634533119136379	SLC25A24	blue	UniprotAccessions-blue_MINCH_1_d_strict_GS4_MM4	7	Cluster 2	Q6NUK1	vs_LPS	DINCH	12	16h_DINCH_10000nM		blue_MINCH_1_d
7100	16h_DINCH_10000nM_ctrlLPS	-0.11425281755963	0.126394999657628	MRPS31	blue	UniprotAccessions-blue_MINCH_1_d_strict_GS4_MM4	11	Cluster 2	Q92665	vs_LPS	DINCH	12	16h_DINCH_10000nM		blue_MINCH_1_d
8100	16h_DINCH_10000nM_ctrlLPS	-0.0316443111961949	0.0505560520797661	PGM2	blue	UniprotAccessions-blue_MINCH_1_d_strict_GS4_MM4	10	Cluster 2	Q96G03	vs_LPS	DINCH	12	16h_DINCH_10000nM		blue_MINCH_1_d
9100	16h_DINCH_10000nM_ctrlLPS	0.240919908380334	0.11502560265691	EGLN1	blue	UniprotAccessions-blue_MINCH_1_d_strict_GS4_MM4	4	Cluster 1	Q9GZT9	vs_LPS	DINCH	12	16h_DINCH_10000nM		blue_MINCH_1_d
10100	16h_DINCH_10000nM_ctrlLPS	-0.0488711205434064	0.439875739336802	RGCC	blue	UniprotAccessions-blue_MINCH_1_d_strict_GS4_MM4	9	Cluster 2	Q9H4X1	vs_LPS	DINCH	12	16h_DINCH_10000nM		blue_MINCH_1_d
11100	16h_DINCH_10000nM_ctrlLPS	-0.149982213716571	0.159788684917389	MCTS1	blue	UniprotAccessions-blue_MINCH_1_d_strict_GS4_MM4	1	Cluster 2	Q9ULC4	vs_LPS	DINCH	12	16h_DINCH_10000nM		blue_MINCH_1_d
78	16h_MINCH_10nM_ctrlLPS	0.417333964544756	0.100733831629797	RAD21	blue	UniprotAccessions-blue_MINCH_1_d_strict_GS4_MM4	5	Cluster 1	O60216	vs_LPS	MINCH	13	16h_MINCH_10nM		blue_MINCH_1_d
79	16h_MINCH_10nM_ctrlLPS	-0.0274743656358657	0.447044647379634	LIMS1	blue	UniprotAccessions-blue_MINCH_1_d_strict_GS4_MM4	8	Cluster 2	P48059	vs_LPS	MINCH	13	16h_MINCH_10nM		blue_MINCH_1_d
80	16h_MINCH_10nM_ctrlLPS	-0.219883047055683	0.00447169054389019	MEF2D	blue	UniprotAccessions-blue_MINCH_1_d_strict_GS4_MM4	2	Cluster 2	Q05BX2	vs_LPS	MINCH	13	16h_MINCH_10nM	**	blue_MINCH_1_d
81	16h_MINCH_10nM_ctrlLPS	0.205025963464412	0.0560303160604735	EP300	blue	UniprotAccessions-blue_MINCH_1_d_strict_GS4_MM4	6	Cluster 1	Q09472	vs_LPS	MINCH	13	16h_MINCH_10nM		blue_MINCH_1_d
82	16h_MINCH_10nM_ctrlLPS	-0.0644008745400469	0.0100241595609372	NNT	blue	UniprotAccessions-blue_MINCH_1_d_strict_GS4_MM4	3	Cluster 2	Q13423	vs_LPS	MINCH	13	16h_MINCH_10nM	*	blue_MINCH_1_d
83	16h_MINCH_10nM_ctrlLPS	-0.0329055918627903	0.155028858408146	SLC25A24	blue	UniprotAccessions-blue_MINCH_1_d_strict_GS4_MM4	7	Cluster 2	Q6NUK1	vs_LPS	MINCH	13	16h_MINCH_10nM		blue_MINCH_1_d
84	16h_MINCH_10nM_ctrlLPS	-0.101605291008269	0.0969563922958115	MRPS31	blue	UniprotAccessions-blue_MINCH_1_d_strict_GS4_MM4	11	Cluster 2	Q92665	vs_LPS	MINCH	13	16h_MINCH_10nM		blue_MINCH_1_d
85	16h_MINCH_10nM_ctrlLPS	-0.0373786498739793	0.166437459491804	PGM2	blue	UniprotAccessions-blue_MINCH_1_d_strict_GS4_MM4	10	Cluster 2	Q96G03	vs_LPS	MINCH	13	16h_MINCH_10nM		blue_MINCH_1_d
86	16h_MINCH_10nM_ctrlLPS	0.201966377607288	0.112330330797525	EGLN1	blue	UniprotAccessions-blue_MINCH_1_d_strict_GS4_MM4	4	Cluster 1	Q9GZT9	vs_LPS	MINCH	13	16h_MINCH_10nM		blue_MINCH_1_d
87	16h_MINCH_10nM_ctrlLPS	-0.195763946972993	0.0220318761734916	RGCC	blue	UniprotAccessions-blue_MINCH_1_d_strict_GS4_MM4	9	Cluster 2	Q9H4X1	vs_LPS	MINCH	13	16h_MINCH_10nM	*	blue_MINCH_1_d
88	16h_MINCH_10nM_ctrlLPS	-0.180983530915745	0.028754770567043	MCTS1	blue	UniprotAccessions-blue_MINCH_1_d_strict_GS4_MM4	1	Cluster 2	Q9ULC4	vs_LPS	MINCH	13	16h_MINCH_10nM	*	blue_MINCH_1_d
6710	16h_MINCH_100nM_ctrlLPS	0.388997670554341	0.102049774855033	RAD21	blue	UniprotAccessions-blue_MINCH_1_d_strict_GS4_MM4	5	Cluster 1	O60216	vs_LPS	MINCH	14	16h_MINCH_100nM		blue_MINCH_1_d
6810	16h_MINCH_100nM_ctrlLPS	-0.0494195426395462	0.0139440039261265	LIMS1	blue	UniprotAccessions-blue_MINCH_1_d_strict_GS4_MM4	8	Cluster 2	P48059	vs_LPS	MINCH	14	16h_MINCH_100nM	*	blue_MINCH_1_d
6910	16h_MINCH_100nM_ctrlLPS	-0.0503693093337513	0.164224614452043	MEF2D	blue	UniprotAccessions-blue_MINCH_1_d_strict_GS4_MM4	2	Cluster 2	Q05BX2	vs_LPS	MINCH	14	16h_MINCH_100nM		blue_MINCH_1_d
7010	16h_MINCH_100nM_ctrlLPS	0.292941023391784	5.88712537825731e-07	EP300	blue	UniprotAccessions-blue_MINCH_1_d_strict_GS4_MM4	6	Cluster 1	Q09472	vs_LPS	MINCH	14	16h_MINCH_100nM	***	blue_MINCH_1_d
7110	16h_MINCH_100nM_ctrlLPS	-0.0523629786810699	0.144320245743528	NNT	blue	UniprotAccessions-blue_MINCH_1_d_strict_GS4_MM4	3	Cluster 2	Q13423	vs_LPS	MINCH	14	16h_MINCH_100nM		blue_MINCH_1_d
7210	16h_MINCH_100nM_ctrlLPS	-0.0281562770664541	0.183808491287233	SLC25A24	blue	UniprotAccessions-blue_MINCH_1_d_strict_GS4_MM4	7	Cluster 2	Q6NUK1	vs_LPS	MINCH	14	16h_MINCH_100nM		blue_MINCH_1_d
73	16h_MINCH_100nM_ctrlLPS	-0.0822764767665259	0.0465957011782313	MRPS31	blue	UniprotAccessions-blue_MINCH_1_d_strict_GS4_MM4	11	Cluster 2	Q92665	vs_LPS	MINCH	14	16h_MINCH_100nM	*	blue_MINCH_1_d
74	16h_MINCH_100nM_ctrlLPS	-0.0715390332368838	0.00858300330619708	PGM2	blue	UniprotAccessions-blue_MINCH_1_d_strict_GS4_MM4	10	Cluster 2	Q96G03	vs_LPS	MINCH	14	16h_MINCH_100nM	**	blue_MINCH_1_d
75	16h_MINCH_100nM_ctrlLPS	0.145215537269397	0.142196751987179	EGLN1	blue	UniprotAccessions-blue_MINCH_1_d_strict_GS4_MM4	4	Cluster 1	Q9GZT9	vs_LPS	MINCH	14	16h_MINCH_100nM		blue_MINCH_1_d
76	16h_MINCH_100nM_ctrlLPS	-0.147075181575582	0.0525483567958974	RGCC	blue	UniprotAccessions-blue_MINCH_1_d_strict_GS4_MM4	9	Cluster 2	Q9H4X1	vs_LPS	MINCH	14	16h_MINCH_100nM		blue_MINCH_1_d
77	16h_MINCH_100nM_ctrlLPS	-0.170008980654629	0.0147342917348512	MCTS1	blue	UniprotAccessions-blue_MINCH_1_d_strict_GS4_MM4	1	Cluster 2	Q9ULC4	vs_LPS	MINCH	14	16h_MINCH_100nM	*	blue_MINCH_1_d
5610	16h_MINCH_1000nM_ctrlLPS	0.443183552192796	0.039814263618645	RAD21	blue	UniprotAccessions-blue_MINCH_1_d_strict_GS4_MM4	5	Cluster 1	O60216	vs_LPS	MINCH	15	16h_MINCH_1000nM	*	blue_MINCH_1_d
5710	16h_MINCH_1000nM_ctrlLPS	-0.0865020095641351	0.103474483941392	LIMS1	blue	UniprotAccessions-blue_MINCH_1_d_strict_GS4_MM4	8	Cluster 2	P48059	vs_LPS	MINCH	15	16h_MINCH_1000nM		blue_MINCH_1_d
5810	16h_MINCH_1000nM_ctrlLPS	0.00668773998891562	0.825712231329151	MEF2D	blue	UniprotAccessions-blue_MINCH_1_d_strict_GS4_MM4	2	Cluster 2	Q05BX2	vs_LPS	MINCH	15	16h_MINCH_1000nM		blue_MINCH_1_d
5910	16h_MINCH_1000nM_ctrlLPS	0.367555624567126	7.48662920793686e-05	EP300	blue	UniprotAccessions-blue_MINCH_1_d_strict_GS4_MM4	6	Cluster 1	Q09472	vs_LPS	MINCH	15	16h_MINCH_1000nM	***	blue_MINCH_1_d
6010	16h_MINCH_1000nM_ctrlLPS	-0.0883445077245261	0.0481948402873091	NNT	blue	UniprotAccessions-blue_MINCH_1_d_strict_GS4_MM4	3	Cluster 2	Q13423	vs_LPS	MINCH	15	16h_MINCH_1000nM	*	blue_MINCH_1_d
6110	16h_MINCH_1000nM_ctrlLPS	-0.0217308680991405	0.520438447121957	SLC25A24	blue	UniprotAccessions-blue_MINCH_1_d_strict_GS4_MM4	7	Cluster 2	Q6NUK1	vs_LPS	MINCH	15	16h_MINCH_1000nM		blue_MINCH_1_d
6210	16h_MINCH_1000nM_ctrlLPS	-0.157646729784874	0.00480650037342724	MRPS31	blue	UniprotAccessions-blue_MINCH_1_d_strict_GS4_MM4	11	Cluster 2	Q92665	vs_LPS	MINCH	15	16h_MINCH_1000nM	**	blue_MINCH_1_d
6310	16h_MINCH_1000nM_ctrlLPS	-0.0530692060040003	0.0335443078397514	PGM2	blue	UniprotAccessions-blue_MINCH_1_d_strict_GS4_MM4	10	Cluster 2	Q96G03	vs_LPS	MINCH	15	16h_MINCH_1000nM	*	blue_MINCH_1_d
6410	16h_MINCH_1000nM_ctrlLPS	0.320381298773214	0.0374269189701544	EGLN1	blue	UniprotAccessions-blue_MINCH_1_d_strict_GS4_MM4	4	Cluster 1	Q9GZT9	vs_LPS	MINCH	15	16h_MINCH_1000nM	*	blue_MINCH_1_d
6510	16h_MINCH_1000nM_ctrlLPS	-0.213928909521134	0.0752087374926511	RGCC	blue	UniprotAccessions-blue_MINCH_1_d_strict_GS4_MM4	9	Cluster 2	Q9H4X1	vs_LPS	MINCH	15	16h_MINCH_1000nM		blue_MINCH_1_d
6610	16h_MINCH_1000nM_ctrlLPS	-0.147422131794209	0.0989564647460536	MCTS1	blue	UniprotAccessions-blue_MINCH_1_d_strict_GS4_MM4	1	Cluster 2	Q9ULC4	vs_LPS	MINCH	15	16h_MINCH_1000nM		blue_MINCH_1_d
4510	16h_MINCH_10000nM_ctrlLPS	0.423633374236556	0.190954963290603	RAD21	blue	UniprotAccessions-blue_MINCH_1_d_strict_GS4_MM4	5	Cluster 1	O60216	vs_LPS	MINCH	16	16h_MINCH_10000nM		blue_MINCH_1_d
4610	16h_MINCH_10000nM_ctrlLPS	-0.0609630589751377	0.0082351414962617	LIMS1	blue	UniprotAccessions-blue_MINCH_1_d_strict_GS4_MM4	8	Cluster 2	P48059	vs_LPS	MINCH	16	16h_MINCH_10000nM	**	blue_MINCH_1_d
4710	16h_MINCH_10000nM_ctrlLPS	0.0183731758182834	0.820399229385331	MEF2D	blue	UniprotAccessions-blue_MINCH_1_d_strict_GS4_MM4	2	Cluster 2	Q05BX2	vs_LPS	MINCH	16	16h_MINCH_10000nM		blue_MINCH_1_d
4810	16h_MINCH_10000nM_ctrlLPS	0.323608801366363	0.0722412241443305	EP300	blue	UniprotAccessions-blue_MINCH_1_d_strict_GS4_MM4	6	Cluster 1	Q09472	vs_LPS	MINCH	16	16h_MINCH_10000nM		blue_MINCH_1_d
4910	16h_MINCH_10000nM_ctrlLPS	-0.087346026990824	0.00253597655255003	NNT	blue	UniprotAccessions-blue_MINCH_1_d_strict_GS4_MM4	3	Cluster 2	Q13423	vs_LPS	MINCH	16	16h_MINCH_10000nM	**	blue_MINCH_1_d
5010	16h_MINCH_10000nM_ctrlLPS	0.000381663363505501	0.991483643590084	SLC25A24	blue	UniprotAccessions-blue_MINCH_1_d_strict_GS4_MM4	7	Cluster 2	Q6NUK1	vs_LPS	MINCH	16	16h_MINCH_10000nM		blue_MINCH_1_d
5110	16h_MINCH_10000nM_ctrlLPS	-0.187409170731699	0.0426768097343654	MRPS31	blue	UniprotAccessions-blue_MINCH_1_d_strict_GS4_MM4	11	Cluster 2	Q92665	vs_LPS	MINCH	16	16h_MINCH_10000nM	*	blue_MINCH_1_d
5210	16h_MINCH_10000nM_ctrlLPS	-0.0753158992216156	0.0356504917769559	PGM2	blue	UniprotAccessions-blue_MINCH_1_d_strict_GS4_MM4	10	Cluster 2	Q96G03	vs_LPS	MINCH	16	16h_MINCH_10000nM	*	blue_MINCH_1_d
5310	16h_MINCH_10000nM_ctrlLPS	0.137710800063349	0.164894756035649	EGLN1	blue	UniprotAccessions-blue_MINCH_1_d_strict_GS4_MM4	4	Cluster 1	Q9GZT9	vs_LPS	MINCH	16	16h_MINCH_10000nM		blue_MINCH_1_d
5410	16h_MINCH_10000nM_ctrlLPS	-0.285822718070899	0.00465054460868851	RGCC	blue	UniprotAccessions-blue_MINCH_1_d_strict_GS4_MM4	9	Cluster 2	Q9H4X1	vs_LPS	MINCH	16	16h_MINCH_10000nM	**	blue_MINCH_1_d
5510	16h_MINCH_10000nM_ctrlLPS	-0.196075888163355	0.0395000637216928	MCTS1	blue	UniprotAccessions-blue_MINCH_1_d_strict_GS4_MM4	1	Cluster 2	Q9ULC4	vs_LPS	MINCH	16	16h_MINCH_10000nM	*	blue_MINCH_1_d
122	1d_DINCH_10nM_ctrlLPS	-0.104914128108219	0.0840829726573042	RAD21	blue	UniprotAccessions-blue_MINCH_1_d_strict_GS4_MM4	5	Cluster 1	O60216	vs_LPS	DINCH	17	1d_DINCH_10nM		blue_MINCH_1_d
123	1d_DINCH_10nM_ctrlLPS	0.00117448557042857	0.952747332153523	LIMS1	blue	UniprotAccessions-blue_MINCH_1_d_strict_GS4_MM4	8	Cluster 2	P48059	vs_LPS	DINCH	17	1d_DINCH_10nM		blue_MINCH_1_d
124	1d_DINCH_10nM_ctrlLPS	NA	NA	MEF2D	blue	UniprotAccessions-blue_MINCH_1_d_strict_GS4_MM4	2	Cluster 2	Q05BX2	vs_LPS	DINCH	17	1d_DINCH_10nM		blue_MINCH_1_d
125	1d_DINCH_10nM_ctrlLPS	-0.0748336045902721	0.299737565247497	EP300	blue	UniprotAccessions-blue_MINCH_1_d_strict_GS4_MM4	6	Cluster 1	Q09472	vs_LPS	DINCH	17	1d_DINCH_10nM		blue_MINCH_1_d
126	1d_DINCH_10nM_ctrlLPS	0.082862967364807	0.00070465120066386	NNT	blue	UniprotAccessions-blue_MINCH_1_d_strict_GS4_MM4	3	Cluster 2	Q13423	vs_LPS	DINCH	17	1d_DINCH_10nM	***	blue_MINCH_1_d
127	1d_DINCH_10nM_ctrlLPS	0.047143627822577	0.00592621513711152	SLC25A24	blue	UniprotAccessions-blue_MINCH_1_d_strict_GS4_MM4	7	Cluster 2	Q6NUK1	vs_LPS	DINCH	17	1d_DINCH_10nM	**	blue_MINCH_1_d
128	1d_DINCH_10nM_ctrlLPS	0.116616281050042	0.00328637419968823	MRPS31	blue	UniprotAccessions-blue_MINCH_1_d_strict_GS4_MM4	11	Cluster 2	Q92665	vs_LPS	DINCH	17	1d_DINCH_10nM	**	blue_MINCH_1_d
129	1d_DINCH_10nM_ctrlLPS	-0.0146107411346935	0.381401311216925	PGM2	blue	UniprotAccessions-blue_MINCH_1_d_strict_GS4_MM4	10	Cluster 2	Q96G03	vs_LPS	DINCH	17	1d_DINCH_10nM		blue_MINCH_1_d
130	1d_DINCH_10nM_ctrlLPS	-0.103390791497755	0.225238464857185	EGLN1	blue	UniprotAccessions-blue_MINCH_1_d_strict_GS4_MM4	4	Cluster 1	Q9GZT9	vs_LPS	DINCH	17	1d_DINCH_10nM		blue_MINCH_1_d
131	1d_DINCH_10nM_ctrlLPS	-0.148753253901635	0.00604456046865082	RGCC	blue	UniprotAccessions-blue_MINCH_1_d_strict_GS4_MM4	9	Cluster 2	Q9H4X1	vs_LPS	DINCH	17	1d_DINCH_10nM	**	blue_MINCH_1_d
132	1d_DINCH_10nM_ctrlLPS	0.0130685683576674	0.680492739216173	MCTS1	blue	UniprotAccessions-blue_MINCH_1_d_strict_GS4_MM4	1	Cluster 2	Q9ULC4	vs_LPS	DINCH	17	1d_DINCH_10nM		blue_MINCH_1_d
111	1d_DINCH_100nM_ctrlLPS	0.00716890851897724	0.768291019362011	RAD21	blue	UniprotAccessions-blue_MINCH_1_d_strict_GS4_MM4	5	Cluster 1	O60216	vs_LPS	DINCH	18	1d_DINCH_100nM		blue_MINCH_1_d
112	1d_DINCH_100nM_ctrlLPS	0.0234957166379121	0.0397528506578688	LIMS1	blue	UniprotAccessions-blue_MINCH_1_d_strict_GS4_MM4	8	Cluster 2	P48059	vs_LPS	DINCH	18	1d_DINCH_100nM	*	blue_MINCH_1_d
113	1d_DINCH_100nM_ctrlLPS	NA	NA	MEF2D	blue	UniprotAccessions-blue_MINCH_1_d_strict_GS4_MM4	2	Cluster 2	Q05BX2	vs_LPS	DINCH	18	1d_DINCH_100nM		blue_MINCH_1_d
114	1d_DINCH_100nM_ctrlLPS	-0.150586706331471	0.0105745265932308	EP300	blue	UniprotAccessions-blue_MINCH_1_d_strict_GS4_MM4	6	Cluster 1	Q09472	vs_LPS	DINCH	18	1d_DINCH_100nM	*	blue_MINCH_1_d
115	1d_DINCH_100nM_ctrlLPS	0.0295926647905628	0.0511751741951125	NNT	blue	UniprotAccessions-blue_MINCH_1_d_strict_GS4_MM4	3	Cluster 2	Q13423	vs_LPS	DINCH	18	1d_DINCH_100nM		blue_MINCH_1_d
116	1d_DINCH_100nM_ctrlLPS	0.0652294002357851	5.22359680661671e-05	SLC25A24	blue	UniprotAccessions-blue_MINCH_1_d_strict_GS4_MM4	7	Cluster 2	Q6NUK1	vs_LPS	DINCH	18	1d_DINCH_100nM	***	blue_MINCH_1_d
117	1d_DINCH_100nM_ctrlLPS	-0.0132331496887558	0.815203935467845	MRPS31	blue	UniprotAccessions-blue_MINCH_1_d_strict_GS4_MM4	11	Cluster 2	Q92665	vs_LPS	DINCH	18	1d_DINCH_100nM		blue_MINCH_1_d
118	1d_DINCH_100nM_ctrlLPS	-0.00894785265769732	0.361059776834132	PGM2	blue	UniprotAccessions-blue_MINCH_1_d_strict_GS4_MM4	10	Cluster 2	Q96G03	vs_LPS	DINCH	18	1d_DINCH_100nM		blue_MINCH_1_d
119	1d_DINCH_100nM_ctrlLPS	-0.0202069432710347	0.834896970150819	EGLN1	blue	UniprotAccessions-blue_MINCH_1_d_strict_GS4_MM4	4	Cluster 1	Q9GZT9	vs_LPS	DINCH	18	1d_DINCH_100nM		blue_MINCH_1_d
120	1d_DINCH_100nM_ctrlLPS	-0.0803481197610089	0.0457404381904003	RGCC	blue	UniprotAccessions-blue_MINCH_1_d_strict_GS4_MM4	9	Cluster 2	Q9H4X1	vs_LPS	DINCH	18	1d_DINCH_100nM	*	blue_MINCH_1_d
121	1d_DINCH_100nM_ctrlLPS	0.0130351308745953	0.67753924353235	MCTS1	blue	UniprotAccessions-blue_MINCH_1_d_strict_GS4_MM4	1	Cluster 2	Q9ULC4	vs_LPS	DINCH	18	1d_DINCH_100nM		blue_MINCH_1_d
100	1d_DINCH_1000nM_ctrlLPS	-0.0172787200362515	0.85072360558759	RAD21	blue	UniprotAccessions-blue_MINCH_1_d_strict_GS4_MM4	5	Cluster 1	O60216	vs_LPS	DINCH	19	1d_DINCH_1000nM		blue_MINCH_1_d
101	1d_DINCH_1000nM_ctrlLPS	-0.0147799828553332	0.012629505692138	LIMS1	blue	UniprotAccessions-blue_MINCH_1_d_strict_GS4_MM4	8	Cluster 2	P48059	vs_LPS	DINCH	19	1d_DINCH_1000nM	*	blue_MINCH_1_d
102	1d_DINCH_1000nM_ctrlLPS	NA	NA	MEF2D	blue	UniprotAccessions-blue_MINCH_1_d_strict_GS4_MM4	2	Cluster 2	Q05BX2	vs_LPS	DINCH	19	1d_DINCH_1000nM		blue_MINCH_1_d
103	1d_DINCH_1000nM_ctrlLPS	-0.091755748924157	0.588075226915838	EP300	blue	UniprotAccessions-blue_MINCH_1_d_strict_GS4_MM4	6	Cluster 1	Q09472	vs_LPS	DINCH	19	1d_DINCH_1000nM		blue_MINCH_1_d
104	1d_DINCH_1000nM_ctrlLPS	0.0404183281115137	0.140542704811498	NNT	blue	UniprotAccessions-blue_MINCH_1_d_strict_GS4_MM4	3	Cluster 2	Q13423	vs_LPS	DINCH	19	1d_DINCH_1000nM		blue_MINCH_1_d
105	1d_DINCH_1000nM_ctrlLPS	0.0608928754721492	0.000124234396525311	SLC25A24	blue	UniprotAccessions-blue_MINCH_1_d_strict_GS4_MM4	7	Cluster 2	Q6NUK1	vs_LPS	DINCH	19	1d_DINCH_1000nM	***	blue_MINCH_1_d
106	1d_DINCH_1000nM_ctrlLPS	0.107037478380833	0.0197790491077603	MRPS31	blue	UniprotAccessions-blue_MINCH_1_d_strict_GS4_MM4	11	Cluster 2	Q92665	vs_LPS	DINCH	19	1d_DINCH_1000nM	*	blue_MINCH_1_d
107	1d_DINCH_1000nM_ctrlLPS	0.003203196186748	0.847794586878146	PGM2	blue	UniprotAccessions-blue_MINCH_1_d_strict_GS4_MM4	10	Cluster 2	Q96G03	vs_LPS	DINCH	19	1d_DINCH_1000nM		blue_MINCH_1_d
108	1d_DINCH_1000nM_ctrlLPS	-0.0473840280992184	0.548754823945762	EGLN1	blue	UniprotAccessions-blue_MINCH_1_d_strict_GS4_MM4	4	Cluster 1	Q9GZT9	vs_LPS	DINCH	19	1d_DINCH_1000nM		blue_MINCH_1_d
109	1d_DINCH_1000nM_ctrlLPS	0.0336610370485959	0.326677518130472	RGCC	blue	UniprotAccessions-blue_MINCH_1_d_strict_GS4_MM4	9	Cluster 2	Q9H4X1	vs_LPS	DINCH	19	1d_DINCH_1000nM		blue_MINCH_1_d
110	1d_DINCH_1000nM_ctrlLPS	0.0979921449053187	0.0494553221749596	MCTS1	blue	UniprotAccessions-blue_MINCH_1_d_strict_GS4_MM4	1	Cluster 2	Q9ULC4	vs_LPS	DINCH	19	1d_DINCH_1000nM	*	blue_MINCH_1_d
89	1d_DINCH_10000nM_ctrlLPS	0.0205435776836468	0.664262174378839	RAD21	blue	UniprotAccessions-blue_MINCH_1_d_strict_GS4_MM4	5	Cluster 1	O60216	vs_LPS	DINCH	20	1d_DINCH_10000nM		blue_MINCH_1_d
90	1d_DINCH_10000nM_ctrlLPS	0.021216892963645	0.191816177771726	LIMS1	blue	UniprotAccessions-blue_MINCH_1_d_strict_GS4_MM4	8	Cluster 2	P48059	vs_LPS	DINCH	20	1d_DINCH_10000nM		blue_MINCH_1_d
91	1d_DINCH_10000nM_ctrlLPS	NA	NA	MEF2D	blue	UniprotAccessions-blue_MINCH_1_d_strict_GS4_MM4	2	Cluster 2	Q05BX2	vs_LPS	DINCH	20	1d_DINCH_10000nM		blue_MINCH_1_d
92	1d_DINCH_10000nM_ctrlLPS	0.0105659172686514	0.907897679041299	EP300	blue	UniprotAccessions-blue_MINCH_1_d_strict_GS4_MM4	6	Cluster 1	Q09472	vs_LPS	DINCH	20	1d_DINCH_10000nM		blue_MINCH_1_d
93	1d_DINCH_10000nM_ctrlLPS	-0.00598305656431936	0.667068334000103	NNT	blue	UniprotAccessions-blue_MINCH_1_d_strict_GS4_MM4	3	Cluster 2	Q13423	vs_LPS	DINCH	20	1d_DINCH_10000nM		blue_MINCH_1_d
94	1d_DINCH_10000nM_ctrlLPS	-0.00399728461573086	0.781441664601135	SLC25A24	blue	UniprotAccessions-blue_MINCH_1_d_strict_GS4_MM4	7	Cluster 2	Q6NUK1	vs_LPS	DINCH	20	1d_DINCH_10000nM		blue_MINCH_1_d
95	1d_DINCH_10000nM_ctrlLPS	-0.0311924114080341	0.557346838579051	MRPS31	blue	UniprotAccessions-blue_MINCH_1_d_strict_GS4_MM4	11	Cluster 2	Q92665	vs_LPS	DINCH	20	1d_DINCH_10000nM		blue_MINCH_1_d
96	1d_DINCH_10000nM_ctrlLPS	-0.0132064215108385	0.206721713299545	PGM2	blue	UniprotAccessions-blue_MINCH_1_d_strict_GS4_MM4	10	Cluster 2	Q96G03	vs_LPS	DINCH	20	1d_DINCH_10000nM		blue_MINCH_1_d
97	1d_DINCH_10000nM_ctrlLPS	-0.000943181413146424	0.976333066247693	EGLN1	blue	UniprotAccessions-blue_MINCH_1_d_strict_GS4_MM4	4	Cluster 1	Q9GZT9	vs_LPS	DINCH	20	1d_DINCH_10000nM		blue_MINCH_1_d
98	1d_DINCH_10000nM_ctrlLPS	-0.0081047982365414	0.590614323761749	RGCC	blue	UniprotAccessions-blue_MINCH_1_d_strict_GS4_MM4	9	Cluster 2	Q9H4X1	vs_LPS	DINCH	20	1d_DINCH_10000nM		blue_MINCH_1_d
99	1d_DINCH_10000nM_ctrlLPS	-0.0616094602131491	0.020732622320926	MCTS1	blue	UniprotAccessions-blue_MINCH_1_d_strict_GS4_MM4	1	Cluster 2	Q9ULC4	vs_LPS	DINCH	20	1d_DINCH_10000nM	*	blue_MINCH_1_d
166	1d_MINCH_10nM_ctrlLPS	0.00401857858447238	0.974203439275051	RAD21	blue	UniprotAccessions-blue_MINCH_1_d_strict_GS4_MM4	5	Cluster 1	O60216	vs_LPS	MINCH	21	1d_MINCH_10nM		blue_MINCH_1_d
167	1d_MINCH_10nM_ctrlLPS	0.0217958976972599	0.370811539278737	LIMS1	blue	UniprotAccessions-blue_MINCH_1_d_strict_GS4_MM4	8	Cluster 2	P48059	vs_LPS	MINCH	21	1d_MINCH_10nM		blue_MINCH_1_d
168	1d_MINCH_10nM_ctrlLPS	NA	NA	MEF2D	blue	UniprotAccessions-blue_MINCH_1_d_strict_GS4_MM4	2	Cluster 2	Q05BX2	vs_LPS	MINCH	21	1d_MINCH_10nM		blue_MINCH_1_d
169	1d_MINCH_10nM_ctrlLPS	-0.0990101022015006	0.598503389017014	EP300	blue	UniprotAccessions-blue_MINCH_1_d_strict_GS4_MM4	6	Cluster 1	Q09472	vs_LPS	MINCH	21	1d_MINCH_10nM		blue_MINCH_1_d
170	1d_MINCH_10nM_ctrlLPS	0.0165345231194882	0.403958444980139	NNT	blue	UniprotAccessions-blue_MINCH_1_d_strict_GS4_MM4	3	Cluster 2	Q13423	vs_LPS	MINCH	21	1d_MINCH_10nM		blue_MINCH_1_d
171	1d_MINCH_10nM_ctrlLPS	0.0244083224952355	0.250593297893764	SLC25A24	blue	UniprotAccessions-blue_MINCH_1_d_strict_GS4_MM4	7	Cluster 2	Q6NUK1	vs_LPS	MINCH	21	1d_MINCH_10nM		blue_MINCH_1_d
172	1d_MINCH_10nM_ctrlLPS	-0.011830879221482	0.763476310036001	MRPS31	blue	UniprotAccessions-blue_MINCH_1_d_strict_GS4_MM4	11	Cluster 2	Q92665	vs_LPS	MINCH	21	1d_MINCH_10nM		blue_MINCH_1_d
173	1d_MINCH_10nM_ctrlLPS	-0.0370663089099714	0.122561075336664	PGM2	blue	UniprotAccessions-blue_MINCH_1_d_strict_GS4_MM4	10	Cluster 2	Q96G03	vs_LPS	MINCH	21	1d_MINCH_10nM		blue_MINCH_1_d
174	1d_MINCH_10nM_ctrlLPS	-0.0681395987881096	0.599343412341077	EGLN1	blue	UniprotAccessions-blue_MINCH_1_d_strict_GS4_MM4	4	Cluster 1	Q9GZT9	vs_LPS	MINCH	21	1d_MINCH_10nM		blue_MINCH_1_d
175	1d_MINCH_10nM_ctrlLPS	-0.0605966364839548	0.126102994735699	RGCC	blue	UniprotAccessions-blue_MINCH_1_d_strict_GS4_MM4	9	Cluster 2	Q9H4X1	vs_LPS	MINCH	21	1d_MINCH_10nM		blue_MINCH_1_d
176	1d_MINCH_10nM_ctrlLPS	0.0519954762657818	0.176801709895501	MCTS1	blue	UniprotAccessions-blue_MINCH_1_d_strict_GS4_MM4	1	Cluster 2	Q9ULC4	vs_LPS	MINCH	21	1d_MINCH_10nM		blue_MINCH_1_d
155	1d_MINCH_100nM_ctrlLPS	-0.0271959495489902	0.78560703603494	RAD21	blue	UniprotAccessions-blue_MINCH_1_d_strict_GS4_MM4	5	Cluster 1	O60216	vs_LPS	MINCH	22	1d_MINCH_100nM		blue_MINCH_1_d
156	1d_MINCH_100nM_ctrlLPS	-0.00563515545792695	0.318227703639879	LIMS1	blue	UniprotAccessions-blue_MINCH_1_d_strict_GS4_MM4	8	Cluster 2	P48059	vs_LPS	MINCH	22	1d_MINCH_100nM		blue_MINCH_1_d
157	1d_MINCH_100nM_ctrlLPS	NA	NA	MEF2D	blue	UniprotAccessions-blue_MINCH_1_d_strict_GS4_MM4	2	Cluster 2	Q05BX2	vs_LPS	MINCH	22	1d_MINCH_100nM		blue_MINCH_1_d
158	1d_MINCH_100nM_ctrlLPS	-0.143518290514153	0.203719515417801	EP300	blue	UniprotAccessions-blue_MINCH_1_d_strict_GS4_MM4	6	Cluster 1	Q09472	vs_LPS	MINCH	22	1d_MINCH_100nM		blue_MINCH_1_d
159	1d_MINCH_100nM_ctrlLPS	-0.0123269943013275	0.301533587526039	NNT	blue	UniprotAccessions-blue_MINCH_1_d_strict_GS4_MM4	3	Cluster 2	Q13423	vs_LPS	MINCH	22	1d_MINCH_100nM		blue_MINCH_1_d
160	1d_MINCH_100nM_ctrlLPS	0.0197499583314724	0.00630811418880015	SLC25A24	blue	UniprotAccessions-blue_MINCH_1_d_strict_GS4_MM4	7	Cluster 2	Q6NUK1	vs_LPS	MINCH	22	1d_MINCH_100nM	**	blue_MINCH_1_d
161	1d_MINCH_100nM_ctrlLPS	-0.0609655100389248	0.233693823626458	MRPS31	blue	UniprotAccessions-blue_MINCH_1_d_strict_GS4_MM4	11	Cluster 2	Q92665	vs_LPS	MINCH	22	1d_MINCH_100nM		blue_MINCH_1_d
162	1d_MINCH_100nM_ctrlLPS	-0.0213077980260426	0.0125189615534396	PGM2	blue	UniprotAccessions-blue_MINCH_1_d_strict_GS4_MM4	10	Cluster 2	Q96G03	vs_LPS	MINCH	22	1d_MINCH_100nM	*	blue_MINCH_1_d
163	1d_MINCH_100nM_ctrlLPS	-0.0833335488557901	0.332744949788228	EGLN1	blue	UniprotAccessions-blue_MINCH_1_d_strict_GS4_MM4	4	Cluster 1	Q9GZT9	vs_LPS	MINCH	22	1d_MINCH_100nM		blue_MINCH_1_d
164	1d_MINCH_100nM_ctrlLPS	-0.0772635425082548	0.0458744310381747	RGCC	blue	UniprotAccessions-blue_MINCH_1_d_strict_GS4_MM4	9	Cluster 2	Q9H4X1	vs_LPS	MINCH	22	1d_MINCH_100nM	*	blue_MINCH_1_d
165	1d_MINCH_100nM_ctrlLPS	0.0234026221098711	0.100760136925157	MCTS1	blue	UniprotAccessions-blue_MINCH_1_d_strict_GS4_MM4	1	Cluster 2	Q9ULC4	vs_LPS	MINCH	22	1d_MINCH_100nM		blue_MINCH_1_d
144	1d_MINCH_1000nM_ctrlLPS	0.0199079160168701	0.6476204460699	RAD21	blue	UniprotAccessions-blue_MINCH_1_d_strict_GS4_MM4	5	Cluster 1	O60216	vs_LPS	MINCH	23	1d_MINCH_1000nM		blue_MINCH_1_d
145	1d_MINCH_1000nM_ctrlLPS	-0.0111684028406704	0.285862986789852	LIMS1	blue	UniprotAccessions-blue_MINCH_1_d_strict_GS4_MM4	8	Cluster 2	P48059	vs_LPS	MINCH	23	1d_MINCH_1000nM		blue_MINCH_1_d
146	1d_MINCH_1000nM_ctrlLPS	NA	NA	MEF2D	blue	UniprotAccessions-blue_MINCH_1_d_strict_GS4_MM4	2	Cluster 2	Q05BX2	vs_LPS	MINCH	23	1d_MINCH_1000nM		blue_MINCH_1_d
147	1d_MINCH_1000nM_ctrlLPS	-0.0804742497743027	0.134784388321496	EP300	blue	UniprotAccessions-blue_MINCH_1_d_strict_GS4_MM4	6	Cluster 1	Q09472	vs_LPS	MINCH	23	1d_MINCH_1000nM		blue_MINCH_1_d
148	1d_MINCH_1000nM_ctrlLPS	-0.00628500200919273	0.608734116169355	NNT	blue	UniprotAccessions-blue_MINCH_1_d_strict_GS4_MM4	3	Cluster 2	Q13423	vs_LPS	MINCH	23	1d_MINCH_1000nM		blue_MINCH_1_d
149	1d_MINCH_1000nM_ctrlLPS	0.00208215544374216	0.543607646441969	SLC25A24	blue	UniprotAccessions-blue_MINCH_1_d_strict_GS4_MM4	7	Cluster 2	Q6NUK1	vs_LPS	MINCH	23	1d_MINCH_1000nM		blue_MINCH_1_d
150	1d_MINCH_1000nM_ctrlLPS	-0.0306949566765636	0.358749204282592	MRPS31	blue	UniprotAccessions-blue_MINCH_1_d_strict_GS4_MM4	11	Cluster 2	Q92665	vs_LPS	MINCH	23	1d_MINCH_1000nM		blue_MINCH_1_d
151	1d_MINCH_1000nM_ctrlLPS	-0.0188577716542228	0.137695548197955	PGM2	blue	UniprotAccessions-blue_MINCH_1_d_strict_GS4_MM4	10	Cluster 2	Q96G03	vs_LPS	MINCH	23	1d_MINCH_1000nM		blue_MINCH_1_d
152	1d_MINCH_1000nM_ctrlLPS	-0.0256817700260254	0.597716768847121	EGLN1	blue	UniprotAccessions-blue_MINCH_1_d_strict_GS4_MM4	4	Cluster 1	Q9GZT9	vs_LPS	MINCH	23	1d_MINCH_1000nM		blue_MINCH_1_d
153	1d_MINCH_1000nM_ctrlLPS	-0.14625759904952	0.00109438296288345	RGCC	blue	UniprotAccessions-blue_MINCH_1_d_strict_GS4_MM4	9	Cluster 2	Q9H4X1	vs_LPS	MINCH	23	1d_MINCH_1000nM	**	blue_MINCH_1_d
154	1d_MINCH_1000nM_ctrlLPS	0.0230727243140522	0.509800037069993	MCTS1	blue	UniprotAccessions-blue_MINCH_1_d_strict_GS4_MM4	1	Cluster 2	Q9ULC4	vs_LPS	MINCH	23	1d_MINCH_1000nM		blue_MINCH_1_d
133	1d_MINCH_10000nM_ctrlLPS	-0.0542211783899698	0.666707835910013	RAD21	blue	UniprotAccessions-blue_MINCH_1_d_strict_GS4_MM4	5	Cluster 1	O60216	vs_LPS	MINCH	24	1d_MINCH_10000nM		blue_MINCH_1_d
134	1d_MINCH_10000nM_ctrlLPS	-0.00530615549414332	0.691447648669201	LIMS1	blue	UniprotAccessions-blue_MINCH_1_d_strict_GS4_MM4	8	Cluster 2	P48059	vs_LPS	MINCH	24	1d_MINCH_10000nM		blue_MINCH_1_d
135	1d_MINCH_10000nM_ctrlLPS	NA	NA	MEF2D	blue	UniprotAccessions-blue_MINCH_1_d_strict_GS4_MM4	2	Cluster 2	Q05BX2	vs_LPS	MINCH	24	1d_MINCH_10000nM		blue_MINCH_1_d
136	1d_MINCH_10000nM_ctrlLPS	-0.0175271057022271	0.937899697706994	EP300	blue	UniprotAccessions-blue_MINCH_1_d_strict_GS4_MM4	6	Cluster 1	Q09472	vs_LPS	MINCH	24	1d_MINCH_10000nM		blue_MINCH_1_d
137	1d_MINCH_10000nM_ctrlLPS	0.00125763386166152	0.956540498770361	NNT	blue	UniprotAccessions-blue_MINCH_1_d_strict_GS4_MM4	3	Cluster 2	Q13423	vs_LPS	MINCH	24	1d_MINCH_10000nM		blue_MINCH_1_d
138	1d_MINCH_10000nM_ctrlLPS	0.0352981192579758	0.0134117885077694	SLC25A24	blue	UniprotAccessions-blue_MINCH_1_d_strict_GS4_MM4	7	Cluster 2	Q6NUK1	vs_LPS	MINCH	24	1d_MINCH_10000nM	*	blue_MINCH_1_d
139	1d_MINCH_10000nM_ctrlLPS	-0.00435114990176768	0.910625215678569	MRPS31	blue	UniprotAccessions-blue_MINCH_1_d_strict_GS4_MM4	11	Cluster 2	Q92665	vs_LPS	MINCH	24	1d_MINCH_10000nM		blue_MINCH_1_d
140	1d_MINCH_10000nM_ctrlLPS	-0.0491152894234885	0.00256767846216191	PGM2	blue	UniprotAccessions-blue_MINCH_1_d_strict_GS4_MM4	10	Cluster 2	Q96G03	vs_LPS	MINCH	24	1d_MINCH_10000nM	**	blue_MINCH_1_d
141	1d_MINCH_10000nM_ctrlLPS	-0.0323887811855327	0.713329300595405	EGLN1	blue	UniprotAccessions-blue_MINCH_1_d_strict_GS4_MM4	4	Cluster 1	Q9GZT9	vs_LPS	MINCH	24	1d_MINCH_10000nM		blue_MINCH_1_d
142	1d_MINCH_10000nM_ctrlLPS	-0.119172834573026	0.0572621385971624	RGCC	blue	UniprotAccessions-blue_MINCH_1_d_strict_GS4_MM4	9	Cluster 2	Q9H4X1	vs_LPS	MINCH	24	1d_MINCH_10000nM		blue_MINCH_1_d
143	1d_MINCH_10000nM_ctrlLPS	0.0311826739310024	0.474613121050513	MCTS1	blue	UniprotAccessions-blue_MINCH_1_d_strict_GS4_MM4	1	Cluster 2	Q9ULC4	vs_LPS	MINCH	24	1d_MINCH_10000nM		blue_MINCH_1_d
21010	4h_DINCH_10nM_ctrlLPS	NA	NA	RAD21	blue	UniprotAccessions-blue_MINCH_16_h_strict_GS4_MM4	5	Cluster 1	O60216	vs_LPS	DINCH	1	4h_DINCH_10nM		blue_MINCH_16_h
21110	4h_DINCH_10nM_ctrlLPS	0.0599294185583131	0.0954210205769826	LIMS1	blue	UniprotAccessions-blue_MINCH_16_h_strict_GS4_MM4	8	Cluster 2	P48059	vs_LPS	DINCH	1	4h_DINCH_10nM		blue_MINCH_16_h
21210	4h_DINCH_10nM_ctrlLPS	0.00175297066733984	0.925403473672118	MEF2D	blue	UniprotAccessions-blue_MINCH_16_h_strict_GS4_MM4	2	Cluster 2	Q05BX2	vs_LPS	DINCH	1	4h_DINCH_10nM		blue_MINCH_16_h
21310	4h_DINCH_10nM_ctrlLPS	NA	NA	EP300	blue	UniprotAccessions-blue_MINCH_16_h_strict_GS4_MM4	6	Cluster 1	Q09472	vs_LPS	DINCH	1	4h_DINCH_10nM		blue_MINCH_16_h
21410	4h_DINCH_10nM_ctrlLPS	0.0219962605264769	0.502749221610748	NNT	blue	UniprotAccessions-blue_MINCH_16_h_strict_GS4_MM4	3	Cluster 2	Q13423	vs_LPS	DINCH	1	4h_DINCH_10nM		blue_MINCH_16_h
21510	4h_DINCH_10nM_ctrlLPS	0.0635103390916947	0.0592584707896008	SLC25A24	blue	UniprotAccessions-blue_MINCH_16_h_strict_GS4_MM4	7	Cluster 2	Q6NUK1	vs_LPS	DINCH	1	4h_DINCH_10nM		blue_MINCH_16_h
21610	4h_DINCH_10nM_ctrlLPS	0.161156203252344	0.244486101054593	MRPS31	blue	UniprotAccessions-blue_MINCH_16_h_strict_GS4_MM4	11	Cluster 2	Q92665	vs_LPS	DINCH	1	4h_DINCH_10nM		blue_MINCH_16_h
21710	4h_DINCH_10nM_ctrlLPS	0.0557646521624178	0.0987922872108001	PGM2	blue	UniprotAccessions-blue_MINCH_16_h_strict_GS4_MM4	10	Cluster 2	Q96G03	vs_LPS	DINCH	1	4h_DINCH_10nM		blue_MINCH_16_h
21810	4h_DINCH_10nM_ctrlLPS	NA	NA	EGLN1	blue	UniprotAccessions-blue_MINCH_16_h_strict_GS4_MM4	4	Cluster 1	Q9GZT9	vs_LPS	DINCH	1	4h_DINCH_10nM		blue_MINCH_16_h
21910	4h_DINCH_10nM_ctrlLPS	0.120890458068148	0.34544709778517	RGCC	blue	UniprotAccessions-blue_MINCH_16_h_strict_GS4_MM4	9	Cluster 2	Q9H4X1	vs_LPS	DINCH	1	4h_DINCH_10nM		blue_MINCH_16_h
22010	4h_DINCH_10nM_ctrlLPS	0.139972785016814	0.270098537637634	MCTS1	blue	UniprotAccessions-blue_MINCH_16_h_strict_GS4_MM4	1	Cluster 2	Q9ULC4	vs_LPS	DINCH	1	4h_DINCH_10nM		blue_MINCH_16_h
19910	4h_DINCH_100nM_ctrlLPS	NA	NA	RAD21	blue	UniprotAccessions-blue_MINCH_16_h_strict_GS4_MM4	5	Cluster 1	O60216	vs_LPS	DINCH	2	4h_DINCH_100nM		blue_MINCH_16_h
20010	4h_DINCH_100nM_ctrlLPS	0.101289976938814	0.0859739246589093	LIMS1	blue	UniprotAccessions-blue_MINCH_16_h_strict_GS4_MM4	8	Cluster 2	P48059	vs_LPS	DINCH	2	4h_DINCH_100nM		blue_MINCH_16_h
20110	4h_DINCH_100nM_ctrlLPS	0.125591649265828	0.0175096601229116	MEF2D	blue	UniprotAccessions-blue_MINCH_16_h_strict_GS4_MM4	2	Cluster 2	Q05BX2	vs_LPS	DINCH	2	4h_DINCH_100nM	*	blue_MINCH_16_h
20210	4h_DINCH_100nM_ctrlLPS	NA	NA	EP300	blue	UniprotAccessions-blue_MINCH_16_h_strict_GS4_MM4	6	Cluster 1	Q09472	vs_LPS	DINCH	2	4h_DINCH_100nM		blue_MINCH_16_h
20310	4h_DINCH_100nM_ctrlLPS	0.0472763948630705	0.30403101639143	NNT	blue	UniprotAccessions-blue_MINCH_16_h_strict_GS4_MM4	3	Cluster 2	Q13423	vs_LPS	DINCH	2	4h_DINCH_100nM		blue_MINCH_16_h
20410	4h_DINCH_100nM_ctrlLPS	0.0687343860763799	0.117406237392619	SLC25A24	blue	UniprotAccessions-blue_MINCH_16_h_strict_GS4_MM4	7	Cluster 2	Q6NUK1	vs_LPS	DINCH	2	4h_DINCH_100nM		blue_MINCH_16_h
20510	4h_DINCH_100nM_ctrlLPS	0.0787973590604001	0.345561876459752	MRPS31	blue	UniprotAccessions-blue_MINCH_16_h_strict_GS4_MM4	11	Cluster 2	Q92665	vs_LPS	DINCH	2	4h_DINCH_100nM		blue_MINCH_16_h
20610	4h_DINCH_100nM_ctrlLPS	0.0145362383179675	0.503174690345235	PGM2	blue	UniprotAccessions-blue_MINCH_16_h_strict_GS4_MM4	10	Cluster 2	Q96G03	vs_LPS	DINCH	2	4h_DINCH_100nM		blue_MINCH_16_h
20710	4h_DINCH_100nM_ctrlLPS	NA	NA	EGLN1	blue	UniprotAccessions-blue_MINCH_16_h_strict_GS4_MM4	4	Cluster 1	Q9GZT9	vs_LPS	DINCH	2	4h_DINCH_100nM		blue_MINCH_16_h
20810	4h_DINCH_100nM_ctrlLPS	0.0377599039546035	0.674821935273112	RGCC	blue	UniprotAccessions-blue_MINCH_16_h_strict_GS4_MM4	9	Cluster 2	Q9H4X1	vs_LPS	DINCH	2	4h_DINCH_100nM		blue_MINCH_16_h
20910	4h_DINCH_100nM_ctrlLPS	0.16428909903604	0.278023791218993	MCTS1	blue	UniprotAccessions-blue_MINCH_16_h_strict_GS4_MM4	1	Cluster 2	Q9ULC4	vs_LPS	DINCH	2	4h_DINCH_100nM		blue_MINCH_16_h
18810	4h_DINCH_1000nM_ctrlLPS	NA	NA	RAD21	blue	UniprotAccessions-blue_MINCH_16_h_strict_GS4_MM4	5	Cluster 1	O60216	vs_LPS	DINCH	3	4h_DINCH_1000nM		blue_MINCH_16_h
18910	4h_DINCH_1000nM_ctrlLPS	0.101532991631258	0.00350547050749205	LIMS1	blue	UniprotAccessions-blue_MINCH_16_h_strict_GS4_MM4	8	Cluster 2	P48059	vs_LPS	DINCH	3	4h_DINCH_1000nM	**	blue_MINCH_16_h
19010	4h_DINCH_1000nM_ctrlLPS	0.0905315706601452	0.179961799269873	MEF2D	blue	UniprotAccessions-blue_MINCH_16_h_strict_GS4_MM4	2	Cluster 2	Q05BX2	vs_LPS	DINCH	3	4h_DINCH_1000nM		blue_MINCH_16_h
19110	4h_DINCH_1000nM_ctrlLPS	NA	NA	EP300	blue	UniprotAccessions-blue_MINCH_16_h_strict_GS4_MM4	6	Cluster 1	Q09472	vs_LPS	DINCH	3	4h_DINCH_1000nM		blue_MINCH_16_h
19210	4h_DINCH_1000nM_ctrlLPS	0.0274433868011402	0.4959786836367	NNT	blue	UniprotAccessions-blue_MINCH_16_h_strict_GS4_MM4	3	Cluster 2	Q13423	vs_LPS	DINCH	3	4h_DINCH_1000nM		blue_MINCH_16_h
19310	4h_DINCH_1000nM_ctrlLPS	0.0764100127704515	0.0651781838066861	SLC25A24	blue	UniprotAccessions-blue_MINCH_16_h_strict_GS4_MM4	7	Cluster 2	Q6NUK1	vs_LPS	DINCH	3	4h_DINCH_1000nM		blue_MINCH_16_h
19410	4h_DINCH_1000nM_ctrlLPS	0.153330249609548	0.160627361635058	MRPS31	blue	UniprotAccessions-blue_MINCH_16_h_strict_GS4_MM4	11	Cluster 2	Q92665	vs_LPS	DINCH	3	4h_DINCH_1000nM		blue_MINCH_16_h
19510	4h_DINCH_1000nM_ctrlLPS	0.00275639082720254	0.749754523082888	PGM2	blue	UniprotAccessions-blue_MINCH_16_h_strict_GS4_MM4	10	Cluster 2	Q96G03	vs_LPS	DINCH	3	4h_DINCH_1000nM		blue_MINCH_16_h
19610	4h_DINCH_1000nM_ctrlLPS	NA	NA	EGLN1	blue	UniprotAccessions-blue_MINCH_16_h_strict_GS4_MM4	4	Cluster 1	Q9GZT9	vs_LPS	DINCH	3	4h_DINCH_1000nM		blue_MINCH_16_h
19710	4h_DINCH_1000nM_ctrlLPS	0.0945381643352553	0.222980639096272	RGCC	blue	UniprotAccessions-blue_MINCH_16_h_strict_GS4_MM4	9	Cluster 2	Q9H4X1	vs_LPS	DINCH	3	4h_DINCH_1000nM		blue_MINCH_16_h
19810	4h_DINCH_1000nM_ctrlLPS	0.182185028867552	0.181776392345116	MCTS1	blue	UniprotAccessions-blue_MINCH_16_h_strict_GS4_MM4	1	Cluster 2	Q9ULC4	vs_LPS	DINCH	3	4h_DINCH_1000nM		blue_MINCH_16_h
17710	4h_DINCH_10000nM_ctrlLPS	NA	NA	RAD21	blue	UniprotAccessions-blue_MINCH_16_h_strict_GS4_MM4	5	Cluster 1	O60216	vs_LPS	DINCH	4	4h_DINCH_10000nM		blue_MINCH_16_h
17810	4h_DINCH_10000nM_ctrlLPS	0.0860092435308225	0.0293863934242613	LIMS1	blue	UniprotAccessions-blue_MINCH_16_h_strict_GS4_MM4	8	Cluster 2	P48059	vs_LPS	DINCH	4	4h_DINCH_10000nM	*	blue_MINCH_16_h
17910	4h_DINCH_10000nM_ctrlLPS	0.115818917778643	0.100931175235355	MEF2D	blue	UniprotAccessions-blue_MINCH_16_h_strict_GS4_MM4	2	Cluster 2	Q05BX2	vs_LPS	DINCH	4	4h_DINCH_10000nM		blue_MINCH_16_h
18010	4h_DINCH_10000nM_ctrlLPS	NA	NA	EP300	blue	UniprotAccessions-blue_MINCH_16_h_strict_GS4_MM4	6	Cluster 1	Q09472	vs_LPS	DINCH	4	4h_DINCH_10000nM		blue_MINCH_16_h
18110	4h_DINCH_10000nM_ctrlLPS	0.0189257763287593	0.60124065808391	NNT	blue	UniprotAccessions-blue_MINCH_16_h_strict_GS4_MM4	3	Cluster 2	Q13423	vs_LPS	DINCH	4	4h_DINCH_10000nM		blue_MINCH_16_h
18210	4h_DINCH_10000nM_ctrlLPS	0.092845303281283	0.0541035069115979	SLC25A24	blue	UniprotAccessions-blue_MINCH_16_h_strict_GS4_MM4	7	Cluster 2	Q6NUK1	vs_LPS	DINCH	4	4h_DINCH_10000nM		blue_MINCH_16_h
18310	4h_DINCH_10000nM_ctrlLPS	0.064385704086943	0.422674706956115	MRPS31	blue	UniprotAccessions-blue_MINCH_16_h_strict_GS4_MM4	11	Cluster 2	Q92665	vs_LPS	DINCH	4	4h_DINCH_10000nM		blue_MINCH_16_h
18410	4h_DINCH_10000nM_ctrlLPS	-0.0240947868214674	0.352522991518712	PGM2	blue	UniprotAccessions-blue_MINCH_16_h_strict_GS4_MM4	10	Cluster 2	Q96G03	vs_LPS	DINCH	4	4h_DINCH_10000nM		blue_MINCH_16_h
18510	4h_DINCH_10000nM_ctrlLPS	NA	NA	EGLN1	blue	UniprotAccessions-blue_MINCH_16_h_strict_GS4_MM4	4	Cluster 1	Q9GZT9	vs_LPS	DINCH	4	4h_DINCH_10000nM		blue_MINCH_16_h
18610	4h_DINCH_10000nM_ctrlLPS	-5.1177521066207e-06	0.99995003573543	RGCC	blue	UniprotAccessions-blue_MINCH_16_h_strict_GS4_MM4	9	Cluster 2	Q9H4X1	vs_LPS	DINCH	4	4h_DINCH_10000nM		blue_MINCH_16_h
18710	4h_DINCH_10000nM_ctrlLPS	0.196537660531699	0.153901776183981	MCTS1	blue	UniprotAccessions-blue_MINCH_16_h_strict_GS4_MM4	1	Cluster 2	Q9ULC4	vs_LPS	DINCH	4	4h_DINCH_10000nM		blue_MINCH_16_h
25410	4h_MINCH_10nM_ctrlLPS	NA	NA	RAD21	blue	UniprotAccessions-blue_MINCH_16_h_strict_GS4_MM4	5	Cluster 1	O60216	vs_LPS	MINCH	5	4h_MINCH_10nM		blue_MINCH_16_h
25510	4h_MINCH_10nM_ctrlLPS	0.036983997946461	0.507621385046474	LIMS1	blue	UniprotAccessions-blue_MINCH_16_h_strict_GS4_MM4	8	Cluster 2	P48059	vs_LPS	MINCH	5	4h_MINCH_10nM		blue_MINCH_16_h
25610	4h_MINCH_10nM_ctrlLPS	0.0473528511685013	0.188663151201489	MEF2D	blue	UniprotAccessions-blue_MINCH_16_h_strict_GS4_MM4	2	Cluster 2	Q05BX2	vs_LPS	MINCH	5	4h_MINCH_10nM		blue_MINCH_16_h
25710	4h_MINCH_10nM_ctrlLPS	NA	NA	EP300	blue	UniprotAccessions-blue_MINCH_16_h_strict_GS4_MM4	6	Cluster 1	Q09472	vs_LPS	MINCH	5	4h_MINCH_10nM		blue_MINCH_16_h
25810	4h_MINCH_10nM_ctrlLPS	-0.00675876233852721	0.834384491248197	NNT	blue	UniprotAccessions-blue_MINCH_16_h_strict_GS4_MM4	3	Cluster 2	Q13423	vs_LPS	MINCH	5	4h_MINCH_10nM		blue_MINCH_16_h
25910	4h_MINCH_10nM_ctrlLPS	0.0284858775291501	0.392611835123931	SLC25A24	blue	UniprotAccessions-blue_MINCH_16_h_strict_GS4_MM4	7	Cluster 2	Q6NUK1	vs_LPS	MINCH	5	4h_MINCH_10nM		blue_MINCH_16_h
26010	4h_MINCH_10nM_ctrlLPS	0.114218246562215	0.0873926271922793	MRPS31	blue	UniprotAccessions-blue_MINCH_16_h_strict_GS4_MM4	11	Cluster 2	Q92665	vs_LPS	MINCH	5	4h_MINCH_10nM		blue_MINCH_16_h
26110	4h_MINCH_10nM_ctrlLPS	-0.00847019151134109	0.670779649197036	PGM2	blue	UniprotAccessions-blue_MINCH_16_h_strict_GS4_MM4	10	Cluster 2	Q96G03	vs_LPS	MINCH	5	4h_MINCH_10nM		blue_MINCH_16_h
26210	4h_MINCH_10nM_ctrlLPS	NA	NA	EGLN1	blue	UniprotAccessions-blue_MINCH_16_h_strict_GS4_MM4	4	Cluster 1	Q9GZT9	vs_LPS	MINCH	5	4h_MINCH_10nM		blue_MINCH_16_h
26310	4h_MINCH_10nM_ctrlLPS	0.120498358462811	0.260189432993177	RGCC	blue	UniprotAccessions-blue_MINCH_16_h_strict_GS4_MM4	9	Cluster 2	Q9H4X1	vs_LPS	MINCH	5	4h_MINCH_10nM		blue_MINCH_16_h
26410	4h_MINCH_10nM_ctrlLPS	0.0335112531858393	0.021104652729283	MCTS1	blue	UniprotAccessions-blue_MINCH_16_h_strict_GS4_MM4	1	Cluster 2	Q9ULC4	vs_LPS	MINCH	5	4h_MINCH_10nM	*	blue_MINCH_16_h
24310	4h_MINCH_100nM_ctrlLPS	NA	NA	RAD21	blue	UniprotAccessions-blue_MINCH_16_h_strict_GS4_MM4	5	Cluster 1	O60216	vs_LPS	MINCH	6	4h_MINCH_100nM		blue_MINCH_16_h
24410	4h_MINCH_100nM_ctrlLPS	0.00827798213612546	0.899136190680927	LIMS1	blue	UniprotAccessions-blue_MINCH_16_h_strict_GS4_MM4	8	Cluster 2	P48059	vs_LPS	MINCH	6	4h_MINCH_100nM		blue_MINCH_16_h
24510	4h_MINCH_100nM_ctrlLPS	0.0375729756046872	0.274447634064407	MEF2D	blue	UniprotAccessions-blue_MINCH_16_h_strict_GS4_MM4	2	Cluster 2	Q05BX2	vs_LPS	MINCH	6	4h_MINCH_100nM		blue_MINCH_16_h
24610	4h_MINCH_100nM_ctrlLPS	NA	NA	EP300	blue	UniprotAccessions-blue_MINCH_16_h_strict_GS4_MM4	6	Cluster 1	Q09472	vs_LPS	MINCH	6	4h_MINCH_100nM		blue_MINCH_16_h
24710	4h_MINCH_100nM_ctrlLPS	-0.0424653314939902	0.136356400854635	NNT	blue	UniprotAccessions-blue_MINCH_16_h_strict_GS4_MM4	3	Cluster 2	Q13423	vs_LPS	MINCH	6	4h_MINCH_100nM		blue_MINCH_16_h
24810	4h_MINCH_100nM_ctrlLPS	0.0367744498135278	0.348286184504059	SLC25A24	blue	UniprotAccessions-blue_MINCH_16_h_strict_GS4_MM4	7	Cluster 2	Q6NUK1	vs_LPS	MINCH	6	4h_MINCH_100nM		blue_MINCH_16_h
24910	4h_MINCH_100nM_ctrlLPS	0.0468177023695937	0.353651049516752	MRPS31	blue	UniprotAccessions-blue_MINCH_16_h_strict_GS4_MM4	11	Cluster 2	Q92665	vs_LPS	MINCH	6	4h_MINCH_100nM		blue_MINCH_16_h
25010	4h_MINCH_100nM_ctrlLPS	-0.0163640693491384	0.486631101833698	PGM2	blue	UniprotAccessions-blue_MINCH_16_h_strict_GS4_MM4	10	Cluster 2	Q96G03	vs_LPS	MINCH	6	4h_MINCH_100nM		blue_MINCH_16_h
25110	4h_MINCH_100nM_ctrlLPS	NA	NA	EGLN1	blue	UniprotAccessions-blue_MINCH_16_h_strict_GS4_MM4	4	Cluster 1	Q9GZT9	vs_LPS	MINCH	6	4h_MINCH_100nM		blue_MINCH_16_h
25210	4h_MINCH_100nM_ctrlLPS	-0.073802557713814	0.285387337302164	RGCC	blue	UniprotAccessions-blue_MINCH_16_h_strict_GS4_MM4	9	Cluster 2	Q9H4X1	vs_LPS	MINCH	6	4h_MINCH_100nM		blue_MINCH_16_h
25310	4h_MINCH_100nM_ctrlLPS	0.012347248297229	0.857504351376634	MCTS1	blue	UniprotAccessions-blue_MINCH_16_h_strict_GS4_MM4	1	Cluster 2	Q9ULC4	vs_LPS	MINCH	6	4h_MINCH_100nM		blue_MINCH_16_h
23210	4h_MINCH_1000nM_ctrlLPS	NA	NA	RAD21	blue	UniprotAccessions-blue_MINCH_16_h_strict_GS4_MM4	5	Cluster 1	O60216	vs_LPS	MINCH	7	4h_MINCH_1000nM		blue_MINCH_16_h
23310	4h_MINCH_1000nM_ctrlLPS	0.023136489338884	0.642092701591388	LIMS1	blue	UniprotAccessions-blue_MINCH_16_h_strict_GS4_MM4	8	Cluster 2	P48059	vs_LPS	MINCH	7	4h_MINCH_1000nM		blue_MINCH_16_h
23410	4h_MINCH_1000nM_ctrlLPS	0.15855197791912	0.0329373945741401	MEF2D	blue	UniprotAccessions-blue_MINCH_16_h_strict_GS4_MM4	2	Cluster 2	Q05BX2	vs_LPS	MINCH	7	4h_MINCH_1000nM	*	blue_MINCH_16_h
23510	4h_MINCH_1000nM_ctrlLPS	NA	NA	EP300	blue	UniprotAccessions-blue_MINCH_16_h_strict_GS4_MM4	6	Cluster 1	Q09472	vs_LPS	MINCH	7	4h_MINCH_1000nM		blue_MINCH_16_h
23610	4h_MINCH_1000nM_ctrlLPS	-0.0603307099755814	0.203013922128862	NNT	blue	UniprotAccessions-blue_MINCH_16_h_strict_GS4_MM4	3	Cluster 2	Q13423	vs_LPS	MINCH	7	4h_MINCH_1000nM		blue_MINCH_16_h
23710	4h_MINCH_1000nM_ctrlLPS	0.0639245931631072	0.0966366999025751	SLC25A24	blue	UniprotAccessions-blue_MINCH_16_h_strict_GS4_MM4	7	Cluster 2	Q6NUK1	vs_LPS	MINCH	7	4h_MINCH_1000nM		blue_MINCH_16_h
23810	4h_MINCH_1000nM_ctrlLPS	0.126348802571775	0.0749502176017645	MRPS31	blue	UniprotAccessions-blue_MINCH_16_h_strict_GS4_MM4	11	Cluster 2	Q92665	vs_LPS	MINCH	7	4h_MINCH_1000nM		blue_MINCH_16_h
23910	4h_MINCH_1000nM_ctrlLPS	0.00277237330086796	0.920812224045441	PGM2	blue	UniprotAccessions-blue_MINCH_16_h_strict_GS4_MM4	10	Cluster 2	Q96G03	vs_LPS	MINCH	7	4h_MINCH_1000nM		blue_MINCH_16_h
24010	4h_MINCH_1000nM_ctrlLPS	NA	NA	EGLN1	blue	UniprotAccessions-blue_MINCH_16_h_strict_GS4_MM4	4	Cluster 1	Q9GZT9	vs_LPS	MINCH	7	4h_MINCH_1000nM		blue_MINCH_16_h
24110	4h_MINCH_1000nM_ctrlLPS	0.0722538371086534	0.397079864929389	RGCC	blue	UniprotAccessions-blue_MINCH_16_h_strict_GS4_MM4	9	Cluster 2	Q9H4X1	vs_LPS	MINCH	7	4h_MINCH_1000nM		blue_MINCH_16_h
24210	4h_MINCH_1000nM_ctrlLPS	0.093362858096818	0.409637290158408	MCTS1	blue	UniprotAccessions-blue_MINCH_16_h_strict_GS4_MM4	1	Cluster 2	Q9ULC4	vs_LPS	MINCH	7	4h_MINCH_1000nM		blue_MINCH_16_h
22110	4h_MINCH_10000nM_ctrlLPS	NA	NA	RAD21	blue	UniprotAccessions-blue_MINCH_16_h_strict_GS4_MM4	5	Cluster 1	O60216	vs_LPS	MINCH	8	4h_MINCH_10000nM		blue_MINCH_16_h
22210	4h_MINCH_10000nM_ctrlLPS	0.088151857076557	0.0575731263201087	LIMS1	blue	UniprotAccessions-blue_MINCH_16_h_strict_GS4_MM4	8	Cluster 2	P48059	vs_LPS	MINCH	8	4h_MINCH_10000nM		blue_MINCH_16_h
22310	4h_MINCH_10000nM_ctrlLPS	0.102507339946385	0.0142472286221161	MEF2D	blue	UniprotAccessions-blue_MINCH_16_h_strict_GS4_MM4	2	Cluster 2	Q05BX2	vs_LPS	MINCH	8	4h_MINCH_10000nM	*	blue_MINCH_16_h
22410	4h_MINCH_10000nM_ctrlLPS	NA	NA	EP300	blue	UniprotAccessions-blue_MINCH_16_h_strict_GS4_MM4	6	Cluster 1	Q09472	vs_LPS	MINCH	8	4h_MINCH_10000nM		blue_MINCH_16_h
22510	4h_MINCH_10000nM_ctrlLPS	-0.026782990754195	0.331398128276027	NNT	blue	UniprotAccessions-blue_MINCH_16_h_strict_GS4_MM4	3	Cluster 2	Q13423	vs_LPS	MINCH	8	4h_MINCH_10000nM		blue_MINCH_16_h
22610	4h_MINCH_10000nM_ctrlLPS	0.0625152952423913	0.298417750065149	SLC25A24	blue	UniprotAccessions-blue_MINCH_16_h_strict_GS4_MM4	7	Cluster 2	Q6NUK1	vs_LPS	MINCH	8	4h_MINCH_10000nM		blue_MINCH_16_h
22710	4h_MINCH_10000nM_ctrlLPS	-0.00681915327684684	0.95567667979764	MRPS31	blue	UniprotAccessions-blue_MINCH_16_h_strict_GS4_MM4	11	Cluster 2	Q92665	vs_LPS	MINCH	8	4h_MINCH_10000nM		blue_MINCH_16_h
22810	4h_MINCH_10000nM_ctrlLPS	0.00511499099435212	0.858206006480314	PGM2	blue	UniprotAccessions-blue_MINCH_16_h_strict_GS4_MM4	10	Cluster 2	Q96G03	vs_LPS	MINCH	8	4h_MINCH_10000nM		blue_MINCH_16_h
22910	4h_MINCH_10000nM_ctrlLPS	NA	NA	EGLN1	blue	UniprotAccessions-blue_MINCH_16_h_strict_GS4_MM4	4	Cluster 1	Q9GZT9	vs_LPS	MINCH	8	4h_MINCH_10000nM		blue_MINCH_16_h
23010	4h_MINCH_10000nM_ctrlLPS	-0.0213153905287156	0.834378261172919	RGCC	blue	UniprotAccessions-blue_MINCH_16_h_strict_GS4_MM4	9	Cluster 2	Q9H4X1	vs_LPS	MINCH	8	4h_MINCH_10000nM		blue_MINCH_16_h
23110	4h_MINCH_10000nM_ctrlLPS	0.147849737674748	0.249759607666742	MCTS1	blue	UniprotAccessions-blue_MINCH_16_h_strict_GS4_MM4	1	Cluster 2	Q9ULC4	vs_LPS	MINCH	8	4h_MINCH_10000nM		blue_MINCH_16_h
3411	16h_DINCH_10nM_ctrlLPS	0.0559887864829634	0.716780023181091	RAD21	blue	UniprotAccessions-blue_MINCH_16_h_strict_GS4_MM4	5	Cluster 1	O60216	vs_LPS	DINCH	9	16h_DINCH_10nM		blue_MINCH_16_h
3511	16h_DINCH_10nM_ctrlLPS	-0.0116789077620008	0.722002788575924	LIMS1	blue	UniprotAccessions-blue_MINCH_16_h_strict_GS4_MM4	8	Cluster 2	P48059	vs_LPS	DINCH	9	16h_DINCH_10nM		blue_MINCH_16_h
3611	16h_DINCH_10nM_ctrlLPS	0.0595827761478612	0.151765618457625	MEF2D	blue	UniprotAccessions-blue_MINCH_16_h_strict_GS4_MM4	2	Cluster 2	Q05BX2	vs_LPS	DINCH	9	16h_DINCH_10nM		blue_MINCH_16_h
3711	16h_DINCH_10nM_ctrlLPS	0.0848356932147529	0.572560729018675	EP300	blue	UniprotAccessions-blue_MINCH_16_h_strict_GS4_MM4	6	Cluster 1	Q09472	vs_LPS	DINCH	9	16h_DINCH_10nM		blue_MINCH_16_h
3811	16h_DINCH_10nM_ctrlLPS	-0.0262695523138151	0.313292848278685	NNT	blue	UniprotAccessions-blue_MINCH_16_h_strict_GS4_MM4	3	Cluster 2	Q13423	vs_LPS	DINCH	9	16h_DINCH_10nM		blue_MINCH_16_h
3911	16h_DINCH_10nM_ctrlLPS	0.0314245262180942	0.282504013563773	SLC25A24	blue	UniprotAccessions-blue_MINCH_16_h_strict_GS4_MM4	7	Cluster 2	Q6NUK1	vs_LPS	DINCH	9	16h_DINCH_10nM		blue_MINCH_16_h
4011	16h_DINCH_10nM_ctrlLPS	-0.0903066478627196	0.0567757506818054	MRPS31	blue	UniprotAccessions-blue_MINCH_16_h_strict_GS4_MM4	11	Cluster 2	Q92665	vs_LPS	DINCH	9	16h_DINCH_10nM		blue_MINCH_16_h
4111	16h_DINCH_10nM_ctrlLPS	-0.00141454456034353	0.953733120845331	PGM2	blue	UniprotAccessions-blue_MINCH_16_h_strict_GS4_MM4	10	Cluster 2	Q96G03	vs_LPS	DINCH	9	16h_DINCH_10nM		blue_MINCH_16_h
4211	16h_DINCH_10nM_ctrlLPS	0.150672806337273	0.0973440443641031	EGLN1	blue	UniprotAccessions-blue_MINCH_16_h_strict_GS4_MM4	4	Cluster 1	Q9GZT9	vs_LPS	DINCH	9	16h_DINCH_10nM		blue_MINCH_16_h
4311	16h_DINCH_10nM_ctrlLPS	-0.0928142257054045	0.0208735731256501	RGCC	blue	UniprotAccessions-blue_MINCH_16_h_strict_GS4_MM4	9	Cluster 2	Q9H4X1	vs_LPS	DINCH	9	16h_DINCH_10nM	*	blue_MINCH_16_h
4411	16h_DINCH_10nM_ctrlLPS	-0.11215018895338	0.0793862715822635	MCTS1	blue	UniprotAccessions-blue_MINCH_16_h_strict_GS4_MM4	1	Cluster 2	Q9ULC4	vs_LPS	DINCH	9	16h_DINCH_10nM		blue_MINCH_16_h
23101	16h_DINCH_100nM_ctrlLPS	0.250748141065184	0.00325565810113312	RAD21	blue	UniprotAccessions-blue_MINCH_16_h_strict_GS4_MM4	5	Cluster 1	O60216	vs_LPS	DINCH	10	16h_DINCH_100nM	**	blue_MINCH_16_h
24101	16h_DINCH_100nM_ctrlLPS	0.00093262674491619	0.953495894966896	LIMS1	blue	UniprotAccessions-blue_MINCH_16_h_strict_GS4_MM4	8	Cluster 2	P48059	vs_LPS	DINCH	10	16h_DINCH_100nM		blue_MINCH_16_h
25101	16h_DINCH_100nM_ctrlLPS	-0.130224292277572	0.0314897827979594	MEF2D	blue	UniprotAccessions-blue_MINCH_16_h_strict_GS4_MM4	2	Cluster 2	Q05BX2	vs_LPS	DINCH	10	16h_DINCH_100nM	*	blue_MINCH_16_h
26101	16h_DINCH_100nM_ctrlLPS	0.121320475619862	0.379456816380469	EP300	blue	UniprotAccessions-blue_MINCH_16_h_strict_GS4_MM4	6	Cluster 1	Q09472	vs_LPS	DINCH	10	16h_DINCH_100nM		blue_MINCH_16_h
2763	16h_DINCH_100nM_ctrlLPS	-0.0213137967224734	0.196347302894221	NNT	blue	UniprotAccessions-blue_MINCH_16_h_strict_GS4_MM4	3	Cluster 2	Q13423	vs_LPS	DINCH	10	16h_DINCH_100nM		blue_MINCH_16_h
2811	16h_DINCH_100nM_ctrlLPS	-0.0238983025886839	0.416705312565436	SLC25A24	blue	UniprotAccessions-blue_MINCH_16_h_strict_GS4_MM4	7	Cluster 2	Q6NUK1	vs_LPS	DINCH	10	16h_DINCH_100nM		blue_MINCH_16_h
2911	16h_DINCH_100nM_ctrlLPS	-0.03182850521022	0.140319415536091	MRPS31	blue	UniprotAccessions-blue_MINCH_16_h_strict_GS4_MM4	11	Cluster 2	Q92665	vs_LPS	DINCH	10	16h_DINCH_100nM		blue_MINCH_16_h
3011	16h_DINCH_100nM_ctrlLPS	-0.0163869576085993	0.263947607343602	PGM2	blue	UniprotAccessions-blue_MINCH_16_h_strict_GS4_MM4	10	Cluster 2	Q96G03	vs_LPS	DINCH	10	16h_DINCH_100nM		blue_MINCH_16_h
3111	16h_DINCH_100nM_ctrlLPS	0.124410222575941	0.128953946346769	EGLN1	blue	UniprotAccessions-blue_MINCH_16_h_strict_GS4_MM4	4	Cluster 1	Q9GZT9	vs_LPS	DINCH	10	16h_DINCH_100nM		blue_MINCH_16_h
3211	16h_DINCH_100nM_ctrlLPS	-0.0589216396073015	0.294599972617861	RGCC	blue	UniprotAccessions-blue_MINCH_16_h_strict_GS4_MM4	9	Cluster 2	Q9H4X1	vs_LPS	DINCH	10	16h_DINCH_100nM		blue_MINCH_16_h
3311	16h_DINCH_100nM_ctrlLPS	-0.0753713998652634	0.197561191521803	MCTS1	blue	UniprotAccessions-blue_MINCH_16_h_strict_GS4_MM4	1	Cluster 2	Q9ULC4	vs_LPS	DINCH	10	16h_DINCH_100nM		blue_MINCH_16_h
12101	16h_DINCH_1000nM_ctrlLPS	0.0581097708456793	0.578593848996775	RAD21	blue	UniprotAccessions-blue_MINCH_16_h_strict_GS4_MM4	5	Cluster 1	O60216	vs_LPS	DINCH	11	16h_DINCH_1000nM		blue_MINCH_16_h
13101	16h_DINCH_1000nM_ctrlLPS	-0.00864844983955564	0.752920104185962	LIMS1	blue	UniprotAccessions-blue_MINCH_16_h_strict_GS4_MM4	8	Cluster 2	P48059	vs_LPS	DINCH	11	16h_DINCH_1000nM		blue_MINCH_16_h
14101	16h_DINCH_1000nM_ctrlLPS	-0.0103586572300821	0.568380246952628	MEF2D	blue	UniprotAccessions-blue_MINCH_16_h_strict_GS4_MM4	2	Cluster 2	Q05BX2	vs_LPS	DINCH	11	16h_DINCH_1000nM		blue_MINCH_16_h
15101	16h_DINCH_1000nM_ctrlLPS	0.152146412623235	0.143909598128147	EP300	blue	UniprotAccessions-blue_MINCH_16_h_strict_GS4_MM4	6	Cluster 1	Q09472	vs_LPS	DINCH	11	16h_DINCH_1000nM		blue_MINCH_16_h
16101	16h_DINCH_1000nM_ctrlLPS	-0.0723714202077654	0.000591338799865903	NNT	blue	UniprotAccessions-blue_MINCH_16_h_strict_GS4_MM4	3	Cluster 2	Q13423	vs_LPS	DINCH	11	16h_DINCH_1000nM	***	blue_MINCH_16_h
17101	16h_DINCH_1000nM_ctrlLPS	0.0762156907375803	0.00132138570181205	SLC25A24	blue	UniprotAccessions-blue_MINCH_16_h_strict_GS4_MM4	7	Cluster 2	Q6NUK1	vs_LPS	DINCH	11	16h_DINCH_1000nM	**	blue_MINCH_16_h
18101	16h_DINCH_1000nM_ctrlLPS	-0.0363855097835897	0.439714917143113	MRPS31	blue	UniprotAccessions-blue_MINCH_16_h_strict_GS4_MM4	11	Cluster 2	Q92665	vs_LPS	DINCH	11	16h_DINCH_1000nM		blue_MINCH_16_h
19101	16h_DINCH_1000nM_ctrlLPS	-0.0199478536935443	0.00953443026827301	PGM2	blue	UniprotAccessions-blue_MINCH_16_h_strict_GS4_MM4	10	Cluster 2	Q96G03	vs_LPS	DINCH	11	16h_DINCH_1000nM	**	blue_MINCH_16_h
20101	16h_DINCH_1000nM_ctrlLPS	-0.023024599672165	0.773825340277835	EGLN1	blue	UniprotAccessions-blue_MINCH_16_h_strict_GS4_MM4	4	Cluster 1	Q9GZT9	vs_LPS	DINCH	11	16h_DINCH_1000nM		blue_MINCH_16_h
21101	16h_DINCH_1000nM_ctrlLPS	-0.0341814025085279	0.589889285688152	RGCC	blue	UniprotAccessions-blue_MINCH_16_h_strict_GS4_MM4	9	Cluster 2	Q9H4X1	vs_LPS	DINCH	11	16h_DINCH_1000nM		blue_MINCH_16_h
22101	16h_DINCH_1000nM_ctrlLPS	-0.108262974013332	0.121163886625383	MCTS1	blue	UniprotAccessions-blue_MINCH_16_h_strict_GS4_MM4	1	Cluster 2	Q9ULC4	vs_LPS	DINCH	11	16h_DINCH_1000nM		blue_MINCH_16_h
11001	16h_DINCH_10000nM_ctrlLPS	0.330867242939787	0.0170234234416218	RAD21	blue	UniprotAccessions-blue_MINCH_16_h_strict_GS4_MM4	5	Cluster 1	O60216	vs_LPS	DINCH	12	16h_DINCH_10000nM	*	blue_MINCH_16_h
2764	16h_DINCH_10000nM_ctrlLPS	-0.0239745574258525	0.441392054191882	LIMS1	blue	UniprotAccessions-blue_MINCH_16_h_strict_GS4_MM4	8	Cluster 2	P48059	vs_LPS	DINCH	12	16h_DINCH_10000nM		blue_MINCH_16_h
3101	16h_DINCH_10000nM_ctrlLPS	-0.0115928234216448	0.491549475449113	MEF2D	blue	UniprotAccessions-blue_MINCH_16_h_strict_GS4_MM4	2	Cluster 2	Q05BX2	vs_LPS	DINCH	12	16h_DINCH_10000nM		blue_MINCH_16_h
4101	16h_DINCH_10000nM_ctrlLPS	0.116741781643775	0.0588522665945854	EP300	blue	UniprotAccessions-blue_MINCH_16_h_strict_GS4_MM4	6	Cluster 1	Q09472	vs_LPS	DINCH	12	16h_DINCH_10000nM		blue_MINCH_16_h
5101	16h_DINCH_10000nM_ctrlLPS	-0.020686214122291	0.315205058020759	NNT	blue	UniprotAccessions-blue_MINCH_16_h_strict_GS4_MM4	3	Cluster 2	Q13423	vs_LPS	DINCH	12	16h_DINCH_10000nM		blue_MINCH_16_h
6101	16h_DINCH_10000nM_ctrlLPS	0.0596659829769016	0.0634533119136379	SLC25A24	blue	UniprotAccessions-blue_MINCH_16_h_strict_GS4_MM4	7	Cluster 2	Q6NUK1	vs_LPS	DINCH	12	16h_DINCH_10000nM		blue_MINCH_16_h
7101	16h_DINCH_10000nM_ctrlLPS	-0.11425281755963	0.126394999657628	MRPS31	blue	UniprotAccessions-blue_MINCH_16_h_strict_GS4_MM4	11	Cluster 2	Q92665	vs_LPS	DINCH	12	16h_DINCH_10000nM		blue_MINCH_16_h
8101	16h_DINCH_10000nM_ctrlLPS	-0.0316443111961949	0.0505560520797661	PGM2	blue	UniprotAccessions-blue_MINCH_16_h_strict_GS4_MM4	10	Cluster 2	Q96G03	vs_LPS	DINCH	12	16h_DINCH_10000nM		blue_MINCH_16_h
9101	16h_DINCH_10000nM_ctrlLPS	0.240919908380334	0.11502560265691	EGLN1	blue	UniprotAccessions-blue_MINCH_16_h_strict_GS4_MM4	4	Cluster 1	Q9GZT9	vs_LPS	DINCH	12	16h_DINCH_10000nM		blue_MINCH_16_h
10101	16h_DINCH_10000nM_ctrlLPS	-0.0488711205434064	0.439875739336802	RGCC	blue	UniprotAccessions-blue_MINCH_16_h_strict_GS4_MM4	9	Cluster 2	Q9H4X1	vs_LPS	DINCH	12	16h_DINCH_10000nM		blue_MINCH_16_h
11101	16h_DINCH_10000nM_ctrlLPS	-0.149982213716571	0.159788684917389	MCTS1	blue	UniprotAccessions-blue_MINCH_16_h_strict_GS4_MM4	1	Cluster 2	Q9ULC4	vs_LPS	DINCH	12	16h_DINCH_10000nM		blue_MINCH_16_h
7810	16h_MINCH_10nM_ctrlLPS	0.417333964544756	0.100733831629797	RAD21	blue	UniprotAccessions-blue_MINCH_16_h_strict_GS4_MM4	5	Cluster 1	O60216	vs_LPS	MINCH	13	16h_MINCH_10nM		blue_MINCH_16_h
7910	16h_MINCH_10nM_ctrlLPS	-0.0274743656358657	0.447044647379634	LIMS1	blue	UniprotAccessions-blue_MINCH_16_h_strict_GS4_MM4	8	Cluster 2	P48059	vs_LPS	MINCH	13	16h_MINCH_10nM		blue_MINCH_16_h
8010	16h_MINCH_10nM_ctrlLPS	-0.219883047055683	0.00447169054389019	MEF2D	blue	UniprotAccessions-blue_MINCH_16_h_strict_GS4_MM4	2	Cluster 2	Q05BX2	vs_LPS	MINCH	13	16h_MINCH_10nM	**	blue_MINCH_16_h
8110	16h_MINCH_10nM_ctrlLPS	0.205025963464412	0.0560303160604735	EP300	blue	UniprotAccessions-blue_MINCH_16_h_strict_GS4_MM4	6	Cluster 1	Q09472	vs_LPS	MINCH	13	16h_MINCH_10nM		blue_MINCH_16_h
8210	16h_MINCH_10nM_ctrlLPS	-0.0644008745400469	0.0100241595609372	NNT	blue	UniprotAccessions-blue_MINCH_16_h_strict_GS4_MM4	3	Cluster 2	Q13423	vs_LPS	MINCH	13	16h_MINCH_10nM	*	blue_MINCH_16_h
8310	16h_MINCH_10nM_ctrlLPS	-0.0329055918627903	0.155028858408146	SLC25A24	blue	UniprotAccessions-blue_MINCH_16_h_strict_GS4_MM4	7	Cluster 2	Q6NUK1	vs_LPS	MINCH	13	16h_MINCH_10nM		blue_MINCH_16_h
8410	16h_MINCH_10nM_ctrlLPS	-0.101605291008269	0.0969563922958115	MRPS31	blue	UniprotAccessions-blue_MINCH_16_h_strict_GS4_MM4	11	Cluster 2	Q92665	vs_LPS	MINCH	13	16h_MINCH_10nM		blue_MINCH_16_h
8510	16h_MINCH_10nM_ctrlLPS	-0.0373786498739793	0.166437459491804	PGM2	blue	UniprotAccessions-blue_MINCH_16_h_strict_GS4_MM4	10	Cluster 2	Q96G03	vs_LPS	MINCH	13	16h_MINCH_10nM		blue_MINCH_16_h
8610	16h_MINCH_10nM_ctrlLPS	0.201966377607288	0.112330330797525	EGLN1	blue	UniprotAccessions-blue_MINCH_16_h_strict_GS4_MM4	4	Cluster 1	Q9GZT9	vs_LPS	MINCH	13	16h_MINCH_10nM		blue_MINCH_16_h
8710	16h_MINCH_10nM_ctrlLPS	-0.195763946972993	0.0220318761734916	RGCC	blue	UniprotAccessions-blue_MINCH_16_h_strict_GS4_MM4	9	Cluster 2	Q9H4X1	vs_LPS	MINCH	13	16h_MINCH_10nM	*	blue_MINCH_16_h
8810	16h_MINCH_10nM_ctrlLPS	-0.180983530915745	0.028754770567043	MCTS1	blue	UniprotAccessions-blue_MINCH_16_h_strict_GS4_MM4	1	Cluster 2	Q9ULC4	vs_LPS	MINCH	13	16h_MINCH_10nM	*	blue_MINCH_16_h
6711	16h_MINCH_100nM_ctrlLPS	0.388997670554341	0.102049774855033	RAD21	blue	UniprotAccessions-blue_MINCH_16_h_strict_GS4_MM4	5	Cluster 1	O60216	vs_LPS	MINCH	14	16h_MINCH_100nM		blue_MINCH_16_h
6811	16h_MINCH_100nM_ctrlLPS	-0.0494195426395462	0.0139440039261265	LIMS1	blue	UniprotAccessions-blue_MINCH_16_h_strict_GS4_MM4	8	Cluster 2	P48059	vs_LPS	MINCH	14	16h_MINCH_100nM	*	blue_MINCH_16_h
6911	16h_MINCH_100nM_ctrlLPS	-0.0503693093337513	0.164224614452043	MEF2D	blue	UniprotAccessions-blue_MINCH_16_h_strict_GS4_MM4	2	Cluster 2	Q05BX2	vs_LPS	MINCH	14	16h_MINCH_100nM		blue_MINCH_16_h
7011	16h_MINCH_100nM_ctrlLPS	0.292941023391784	5.88712537825731e-07	EP300	blue	UniprotAccessions-blue_MINCH_16_h_strict_GS4_MM4	6	Cluster 1	Q09472	vs_LPS	MINCH	14	16h_MINCH_100nM	***	blue_MINCH_16_h
7111	16h_MINCH_100nM_ctrlLPS	-0.0523629786810699	0.144320245743528	NNT	blue	UniprotAccessions-blue_MINCH_16_h_strict_GS4_MM4	3	Cluster 2	Q13423	vs_LPS	MINCH	14	16h_MINCH_100nM		blue_MINCH_16_h
7211	16h_MINCH_100nM_ctrlLPS	-0.0281562770664541	0.183808491287233	SLC25A24	blue	UniprotAccessions-blue_MINCH_16_h_strict_GS4_MM4	7	Cluster 2	Q6NUK1	vs_LPS	MINCH	14	16h_MINCH_100nM		blue_MINCH_16_h
7310	16h_MINCH_100nM_ctrlLPS	-0.0822764767665259	0.0465957011782313	MRPS31	blue	UniprotAccessions-blue_MINCH_16_h_strict_GS4_MM4	11	Cluster 2	Q92665	vs_LPS	MINCH	14	16h_MINCH_100nM	*	blue_MINCH_16_h
7410	16h_MINCH_100nM_ctrlLPS	-0.0715390332368838	0.00858300330619708	PGM2	blue	UniprotAccessions-blue_MINCH_16_h_strict_GS4_MM4	10	Cluster 2	Q96G03	vs_LPS	MINCH	14	16h_MINCH_100nM	**	blue_MINCH_16_h
7510	16h_MINCH_100nM_ctrlLPS	0.145215537269397	0.142196751987179	EGLN1	blue	UniprotAccessions-blue_MINCH_16_h_strict_GS4_MM4	4	Cluster 1	Q9GZT9	vs_LPS	MINCH	14	16h_MINCH_100nM		blue_MINCH_16_h
7610	16h_MINCH_100nM_ctrlLPS	-0.147075181575582	0.0525483567958974	RGCC	blue	UniprotAccessions-blue_MINCH_16_h_strict_GS4_MM4	9	Cluster 2	Q9H4X1	vs_LPS	MINCH	14	16h_MINCH_100nM		blue_MINCH_16_h
7710	16h_MINCH_100nM_ctrlLPS	-0.170008980654629	0.0147342917348512	MCTS1	blue	UniprotAccessions-blue_MINCH_16_h_strict_GS4_MM4	1	Cluster 2	Q9ULC4	vs_LPS	MINCH	14	16h_MINCH_100nM	*	blue_MINCH_16_h
5611	16h_MINCH_1000nM_ctrlLPS	0.443183552192796	0.039814263618645	RAD21	blue	UniprotAccessions-blue_MINCH_16_h_strict_GS4_MM4	5	Cluster 1	O60216	vs_LPS	MINCH	15	16h_MINCH_1000nM	*	blue_MINCH_16_h
5711	16h_MINCH_1000nM_ctrlLPS	-0.0865020095641351	0.103474483941392	LIMS1	blue	UniprotAccessions-blue_MINCH_16_h_strict_GS4_MM4	8	Cluster 2	P48059	vs_LPS	MINCH	15	16h_MINCH_1000nM		blue_MINCH_16_h
5811	16h_MINCH_1000nM_ctrlLPS	0.00668773998891562	0.825712231329151	MEF2D	blue	UniprotAccessions-blue_MINCH_16_h_strict_GS4_MM4	2	Cluster 2	Q05BX2	vs_LPS	MINCH	15	16h_MINCH_1000nM		blue_MINCH_16_h
5911	16h_MINCH_1000nM_ctrlLPS	0.367555624567126	7.48662920793686e-05	EP300	blue	UniprotAccessions-blue_MINCH_16_h_strict_GS4_MM4	6	Cluster 1	Q09472	vs_LPS	MINCH	15	16h_MINCH_1000nM	***	blue_MINCH_16_h
6011	16h_MINCH_1000nM_ctrlLPS	-0.0883445077245261	0.0481948402873091	NNT	blue	UniprotAccessions-blue_MINCH_16_h_strict_GS4_MM4	3	Cluster 2	Q13423	vs_LPS	MINCH	15	16h_MINCH_1000nM	*	blue_MINCH_16_h
6111	16h_MINCH_1000nM_ctrlLPS	-0.0217308680991405	0.520438447121957	SLC25A24	blue	UniprotAccessions-blue_MINCH_16_h_strict_GS4_MM4	7	Cluster 2	Q6NUK1	vs_LPS	MINCH	15	16h_MINCH_1000nM		blue_MINCH_16_h
6211	16h_MINCH_1000nM_ctrlLPS	-0.157646729784874	0.00480650037342724	MRPS31	blue	UniprotAccessions-blue_MINCH_16_h_strict_GS4_MM4	11	Cluster 2	Q92665	vs_LPS	MINCH	15	16h_MINCH_1000nM	**	blue_MINCH_16_h
6311	16h_MINCH_1000nM_ctrlLPS	-0.0530692060040003	0.0335443078397514	PGM2	blue	UniprotAccessions-blue_MINCH_16_h_strict_GS4_MM4	10	Cluster 2	Q96G03	vs_LPS	MINCH	15	16h_MINCH_1000nM	*	blue_MINCH_16_h
6411	16h_MINCH_1000nM_ctrlLPS	0.320381298773214	0.0374269189701544	EGLN1	blue	UniprotAccessions-blue_MINCH_16_h_strict_GS4_MM4	4	Cluster 1	Q9GZT9	vs_LPS	MINCH	15	16h_MINCH_1000nM	*	blue_MINCH_16_h
6511	16h_MINCH_1000nM_ctrlLPS	-0.213928909521134	0.0752087374926511	RGCC	blue	UniprotAccessions-blue_MINCH_16_h_strict_GS4_MM4	9	Cluster 2	Q9H4X1	vs_LPS	MINCH	15	16h_MINCH_1000nM		blue_MINCH_16_h
6611	16h_MINCH_1000nM_ctrlLPS	-0.147422131794209	0.0989564647460536	MCTS1	blue	UniprotAccessions-blue_MINCH_16_h_strict_GS4_MM4	1	Cluster 2	Q9ULC4	vs_LPS	MINCH	15	16h_MINCH_1000nM		blue_MINCH_16_h
4511	16h_MINCH_10000nM_ctrlLPS	0.423633374236556	0.190954963290603	RAD21	blue	UniprotAccessions-blue_MINCH_16_h_strict_GS4_MM4	5	Cluster 1	O60216	vs_LPS	MINCH	16	16h_MINCH_10000nM		blue_MINCH_16_h
4611	16h_MINCH_10000nM_ctrlLPS	-0.0609630589751377	0.0082351414962617	LIMS1	blue	UniprotAccessions-blue_MINCH_16_h_strict_GS4_MM4	8	Cluster 2	P48059	vs_LPS	MINCH	16	16h_MINCH_10000nM	**	blue_MINCH_16_h
4711	16h_MINCH_10000nM_ctrlLPS	0.0183731758182834	0.820399229385331	MEF2D	blue	UniprotAccessions-blue_MINCH_16_h_strict_GS4_MM4	2	Cluster 2	Q05BX2	vs_LPS	MINCH	16	16h_MINCH_10000nM		blue_MINCH_16_h
4811	16h_MINCH_10000nM_ctrlLPS	0.323608801366363	0.0722412241443305	EP300	blue	UniprotAccessions-blue_MINCH_16_h_strict_GS4_MM4	6	Cluster 1	Q09472	vs_LPS	MINCH	16	16h_MINCH_10000nM		blue_MINCH_16_h
4911	16h_MINCH_10000nM_ctrlLPS	-0.087346026990824	0.00253597655255003	NNT	blue	UniprotAccessions-blue_MINCH_16_h_strict_GS4_MM4	3	Cluster 2	Q13423	vs_LPS	MINCH	16	16h_MINCH_10000nM	**	blue_MINCH_16_h
5011	16h_MINCH_10000nM_ctrlLPS	0.000381663363505501	0.991483643590084	SLC25A24	blue	UniprotAccessions-blue_MINCH_16_h_strict_GS4_MM4	7	Cluster 2	Q6NUK1	vs_LPS	MINCH	16	16h_MINCH_10000nM		blue_MINCH_16_h
5111	16h_MINCH_10000nM_ctrlLPS	-0.187409170731699	0.0426768097343654	MRPS31	blue	UniprotAccessions-blue_MINCH_16_h_strict_GS4_MM4	11	Cluster 2	Q92665	vs_LPS	MINCH	16	16h_MINCH_10000nM	*	blue_MINCH_16_h
5211	16h_MINCH_10000nM_ctrlLPS	-0.0753158992216156	0.0356504917769559	PGM2	blue	UniprotAccessions-blue_MINCH_16_h_strict_GS4_MM4	10	Cluster 2	Q96G03	vs_LPS	MINCH	16	16h_MINCH_10000nM	*	blue_MINCH_16_h
5311	16h_MINCH_10000nM_ctrlLPS	0.137710800063349	0.164894756035649	EGLN1	blue	UniprotAccessions-blue_MINCH_16_h_strict_GS4_MM4	4	Cluster 1	Q9GZT9	vs_LPS	MINCH	16	16h_MINCH_10000nM		blue_MINCH_16_h
5411	16h_MINCH_10000nM_ctrlLPS	-0.285822718070899	0.00465054460868851	RGCC	blue	UniprotAccessions-blue_MINCH_16_h_strict_GS4_MM4	9	Cluster 2	Q9H4X1	vs_LPS	MINCH	16	16h_MINCH_10000nM	**	blue_MINCH_16_h
5511	16h_MINCH_10000nM_ctrlLPS	-0.196075888163355	0.0395000637216928	MCTS1	blue	UniprotAccessions-blue_MINCH_16_h_strict_GS4_MM4	1	Cluster 2	Q9ULC4	vs_LPS	MINCH	16	16h_MINCH_10000nM	*	blue_MINCH_16_h
12210	1d_DINCH_10nM_ctrlLPS	-0.104914128108219	0.0840829726573042	RAD21	blue	UniprotAccessions-blue_MINCH_16_h_strict_GS4_MM4	5	Cluster 1	O60216	vs_LPS	DINCH	17	1d_DINCH_10nM		blue_MINCH_16_h
12310	1d_DINCH_10nM_ctrlLPS	0.00117448557042857	0.952747332153523	LIMS1	blue	UniprotAccessions-blue_MINCH_16_h_strict_GS4_MM4	8	Cluster 2	P48059	vs_LPS	DINCH	17	1d_DINCH_10nM		blue_MINCH_16_h
12410	1d_DINCH_10nM_ctrlLPS	NA	NA	MEF2D	blue	UniprotAccessions-blue_MINCH_16_h_strict_GS4_MM4	2	Cluster 2	Q05BX2	vs_LPS	DINCH	17	1d_DINCH_10nM		blue_MINCH_16_h
12510	1d_DINCH_10nM_ctrlLPS	-0.0748336045902721	0.299737565247497	EP300	blue	UniprotAccessions-blue_MINCH_16_h_strict_GS4_MM4	6	Cluster 1	Q09472	vs_LPS	DINCH	17	1d_DINCH_10nM		blue_MINCH_16_h
12610	1d_DINCH_10nM_ctrlLPS	0.082862967364807	0.00070465120066386	NNT	blue	UniprotAccessions-blue_MINCH_16_h_strict_GS4_MM4	3	Cluster 2	Q13423	vs_LPS	DINCH	17	1d_DINCH_10nM	***	blue_MINCH_16_h
12710	1d_DINCH_10nM_ctrlLPS	0.047143627822577	0.00592621513711152	SLC25A24	blue	UniprotAccessions-blue_MINCH_16_h_strict_GS4_MM4	7	Cluster 2	Q6NUK1	vs_LPS	DINCH	17	1d_DINCH_10nM	**	blue_MINCH_16_h
12810	1d_DINCH_10nM_ctrlLPS	0.116616281050042	0.00328637419968823	MRPS31	blue	UniprotAccessions-blue_MINCH_16_h_strict_GS4_MM4	11	Cluster 2	Q92665	vs_LPS	DINCH	17	1d_DINCH_10nM	**	blue_MINCH_16_h
12910	1d_DINCH_10nM_ctrlLPS	-0.0146107411346935	0.381401311216925	PGM2	blue	UniprotAccessions-blue_MINCH_16_h_strict_GS4_MM4	10	Cluster 2	Q96G03	vs_LPS	DINCH	17	1d_DINCH_10nM		blue_MINCH_16_h
13010	1d_DINCH_10nM_ctrlLPS	-0.103390791497755	0.225238464857185	EGLN1	blue	UniprotAccessions-blue_MINCH_16_h_strict_GS4_MM4	4	Cluster 1	Q9GZT9	vs_LPS	DINCH	17	1d_DINCH_10nM		blue_MINCH_16_h
13110	1d_DINCH_10nM_ctrlLPS	-0.148753253901635	0.00604456046865082	RGCC	blue	UniprotAccessions-blue_MINCH_16_h_strict_GS4_MM4	9	Cluster 2	Q9H4X1	vs_LPS	DINCH	17	1d_DINCH_10nM	**	blue_MINCH_16_h
13210	1d_DINCH_10nM_ctrlLPS	0.0130685683576674	0.680492739216173	MCTS1	blue	UniprotAccessions-blue_MINCH_16_h_strict_GS4_MM4	1	Cluster 2	Q9ULC4	vs_LPS	DINCH	17	1d_DINCH_10nM		blue_MINCH_16_h
11110	1d_DINCH_100nM_ctrlLPS	0.00716890851897724	0.768291019362011	RAD21	blue	UniprotAccessions-blue_MINCH_16_h_strict_GS4_MM4	5	Cluster 1	O60216	vs_LPS	DINCH	18	1d_DINCH_100nM		blue_MINCH_16_h
11210	1d_DINCH_100nM_ctrlLPS	0.0234957166379121	0.0397528506578688	LIMS1	blue	UniprotAccessions-blue_MINCH_16_h_strict_GS4_MM4	8	Cluster 2	P48059	vs_LPS	DINCH	18	1d_DINCH_100nM	*	blue_MINCH_16_h
11310	1d_DINCH_100nM_ctrlLPS	NA	NA	MEF2D	blue	UniprotAccessions-blue_MINCH_16_h_strict_GS4_MM4	2	Cluster 2	Q05BX2	vs_LPS	DINCH	18	1d_DINCH_100nM		blue_MINCH_16_h
11410	1d_DINCH_100nM_ctrlLPS	-0.150586706331471	0.0105745265932308	EP300	blue	UniprotAccessions-blue_MINCH_16_h_strict_GS4_MM4	6	Cluster 1	Q09472	vs_LPS	DINCH	18	1d_DINCH_100nM	*	blue_MINCH_16_h
11510	1d_DINCH_100nM_ctrlLPS	0.0295926647905628	0.0511751741951125	NNT	blue	UniprotAccessions-blue_MINCH_16_h_strict_GS4_MM4	3	Cluster 2	Q13423	vs_LPS	DINCH	18	1d_DINCH_100nM		blue_MINCH_16_h
11610	1d_DINCH_100nM_ctrlLPS	0.0652294002357851	5.22359680661671e-05	SLC25A24	blue	UniprotAccessions-blue_MINCH_16_h_strict_GS4_MM4	7	Cluster 2	Q6NUK1	vs_LPS	DINCH	18	1d_DINCH_100nM	***	blue_MINCH_16_h
11710	1d_DINCH_100nM_ctrlLPS	-0.0132331496887558	0.815203935467845	MRPS31	blue	UniprotAccessions-blue_MINCH_16_h_strict_GS4_MM4	11	Cluster 2	Q92665	vs_LPS	DINCH	18	1d_DINCH_100nM		blue_MINCH_16_h
11810	1d_DINCH_100nM_ctrlLPS	-0.00894785265769732	0.361059776834132	PGM2	blue	UniprotAccessions-blue_MINCH_16_h_strict_GS4_MM4	10	Cluster 2	Q96G03	vs_LPS	DINCH	18	1d_DINCH_100nM		blue_MINCH_16_h
11910	1d_DINCH_100nM_ctrlLPS	-0.0202069432710347	0.834896970150819	EGLN1	blue	UniprotAccessions-blue_MINCH_16_h_strict_GS4_MM4	4	Cluster 1	Q9GZT9	vs_LPS	DINCH	18	1d_DINCH_100nM		blue_MINCH_16_h
12010	1d_DINCH_100nM_ctrlLPS	-0.0803481197610089	0.0457404381904003	RGCC	blue	UniprotAccessions-blue_MINCH_16_h_strict_GS4_MM4	9	Cluster 2	Q9H4X1	vs_LPS	DINCH	18	1d_DINCH_100nM	*	blue_MINCH_16_h
12110	1d_DINCH_100nM_ctrlLPS	0.0130351308745953	0.67753924353235	MCTS1	blue	UniprotAccessions-blue_MINCH_16_h_strict_GS4_MM4	1	Cluster 2	Q9ULC4	vs_LPS	DINCH	18	1d_DINCH_100nM		blue_MINCH_16_h
10010	1d_DINCH_1000nM_ctrlLPS	-0.0172787200362515	0.85072360558759	RAD21	blue	UniprotAccessions-blue_MINCH_16_h_strict_GS4_MM4	5	Cluster 1	O60216	vs_LPS	DINCH	19	1d_DINCH_1000nM		blue_MINCH_16_h
10110	1d_DINCH_1000nM_ctrlLPS	-0.0147799828553332	0.012629505692138	LIMS1	blue	UniprotAccessions-blue_MINCH_16_h_strict_GS4_MM4	8	Cluster 2	P48059	vs_LPS	DINCH	19	1d_DINCH_1000nM	*	blue_MINCH_16_h
10210	1d_DINCH_1000nM_ctrlLPS	NA	NA	MEF2D	blue	UniprotAccessions-blue_MINCH_16_h_strict_GS4_MM4	2	Cluster 2	Q05BX2	vs_LPS	DINCH	19	1d_DINCH_1000nM		blue_MINCH_16_h
10310	1d_DINCH_1000nM_ctrlLPS	-0.091755748924157	0.588075226915838	EP300	blue	UniprotAccessions-blue_MINCH_16_h_strict_GS4_MM4	6	Cluster 1	Q09472	vs_LPS	DINCH	19	1d_DINCH_1000nM		blue_MINCH_16_h
10410	1d_DINCH_1000nM_ctrlLPS	0.0404183281115137	0.140542704811498	NNT	blue	UniprotAccessions-blue_MINCH_16_h_strict_GS4_MM4	3	Cluster 2	Q13423	vs_LPS	DINCH	19	1d_DINCH_1000nM		blue_MINCH_16_h
10510	1d_DINCH_1000nM_ctrlLPS	0.0608928754721492	0.000124234396525311	SLC25A24	blue	UniprotAccessions-blue_MINCH_16_h_strict_GS4_MM4	7	Cluster 2	Q6NUK1	vs_LPS	DINCH	19	1d_DINCH_1000nM	***	blue_MINCH_16_h
10610	1d_DINCH_1000nM_ctrlLPS	0.107037478380833	0.0197790491077603	MRPS31	blue	UniprotAccessions-blue_MINCH_16_h_strict_GS4_MM4	11	Cluster 2	Q92665	vs_LPS	DINCH	19	1d_DINCH_1000nM	*	blue_MINCH_16_h
10710	1d_DINCH_1000nM_ctrlLPS	0.003203196186748	0.847794586878146	PGM2	blue	UniprotAccessions-blue_MINCH_16_h_strict_GS4_MM4	10	Cluster 2	Q96G03	vs_LPS	DINCH	19	1d_DINCH_1000nM		blue_MINCH_16_h
10810	1d_DINCH_1000nM_ctrlLPS	-0.0473840280992184	0.548754823945762	EGLN1	blue	UniprotAccessions-blue_MINCH_16_h_strict_GS4_MM4	4	Cluster 1	Q9GZT9	vs_LPS	DINCH	19	1d_DINCH_1000nM		blue_MINCH_16_h
10910	1d_DINCH_1000nM_ctrlLPS	0.0336610370485959	0.326677518130472	RGCC	blue	UniprotAccessions-blue_MINCH_16_h_strict_GS4_MM4	9	Cluster 2	Q9H4X1	vs_LPS	DINCH	19	1d_DINCH_1000nM		blue_MINCH_16_h
11010	1d_DINCH_1000nM_ctrlLPS	0.0979921449053187	0.0494553221749596	MCTS1	blue	UniprotAccessions-blue_MINCH_16_h_strict_GS4_MM4	1	Cluster 2	Q9ULC4	vs_LPS	DINCH	19	1d_DINCH_1000nM	*	blue_MINCH_16_h
8910	1d_DINCH_10000nM_ctrlLPS	0.0205435776836468	0.664262174378839	RAD21	blue	UniprotAccessions-blue_MINCH_16_h_strict_GS4_MM4	5	Cluster 1	O60216	vs_LPS	DINCH	20	1d_DINCH_10000nM		blue_MINCH_16_h
9010	1d_DINCH_10000nM_ctrlLPS	0.021216892963645	0.191816177771726	LIMS1	blue	UniprotAccessions-blue_MINCH_16_h_strict_GS4_MM4	8	Cluster 2	P48059	vs_LPS	DINCH	20	1d_DINCH_10000nM		blue_MINCH_16_h
9110	1d_DINCH_10000nM_ctrlLPS	NA	NA	MEF2D	blue	UniprotAccessions-blue_MINCH_16_h_strict_GS4_MM4	2	Cluster 2	Q05BX2	vs_LPS	DINCH	20	1d_DINCH_10000nM		blue_MINCH_16_h
9210	1d_DINCH_10000nM_ctrlLPS	0.0105659172686514	0.907897679041299	EP300	blue	UniprotAccessions-blue_MINCH_16_h_strict_GS4_MM4	6	Cluster 1	Q09472	vs_LPS	DINCH	20	1d_DINCH_10000nM		blue_MINCH_16_h
9310	1d_DINCH_10000nM_ctrlLPS	-0.00598305656431936	0.667068334000103	NNT	blue	UniprotAccessions-blue_MINCH_16_h_strict_GS4_MM4	3	Cluster 2	Q13423	vs_LPS	DINCH	20	1d_DINCH_10000nM		blue_MINCH_16_h
9410	1d_DINCH_10000nM_ctrlLPS	-0.00399728461573086	0.781441664601135	SLC25A24	blue	UniprotAccessions-blue_MINCH_16_h_strict_GS4_MM4	7	Cluster 2	Q6NUK1	vs_LPS	DINCH	20	1d_DINCH_10000nM		blue_MINCH_16_h
9510	1d_DINCH_10000nM_ctrlLPS	-0.0311924114080341	0.557346838579051	MRPS31	blue	UniprotAccessions-blue_MINCH_16_h_strict_GS4_MM4	11	Cluster 2	Q92665	vs_LPS	DINCH	20	1d_DINCH_10000nM		blue_MINCH_16_h
9610	1d_DINCH_10000nM_ctrlLPS	-0.0132064215108385	0.206721713299545	PGM2	blue	UniprotAccessions-blue_MINCH_16_h_strict_GS4_MM4	10	Cluster 2	Q96G03	vs_LPS	DINCH	20	1d_DINCH_10000nM		blue_MINCH_16_h
9710	1d_DINCH_10000nM_ctrlLPS	-0.000943181413146424	0.976333066247693	EGLN1	blue	UniprotAccessions-blue_MINCH_16_h_strict_GS4_MM4	4	Cluster 1	Q9GZT9	vs_LPS	DINCH	20	1d_DINCH_10000nM		blue_MINCH_16_h
9810	1d_DINCH_10000nM_ctrlLPS	-0.0081047982365414	0.590614323761749	RGCC	blue	UniprotAccessions-blue_MINCH_16_h_strict_GS4_MM4	9	Cluster 2	Q9H4X1	vs_LPS	DINCH	20	1d_DINCH_10000nM		blue_MINCH_16_h
9910	1d_DINCH_10000nM_ctrlLPS	-0.0616094602131491	0.020732622320926	MCTS1	blue	UniprotAccessions-blue_MINCH_16_h_strict_GS4_MM4	1	Cluster 2	Q9ULC4	vs_LPS	DINCH	20	1d_DINCH_10000nM	*	blue_MINCH_16_h
16610	1d_MINCH_10nM_ctrlLPS	0.00401857858447238	0.974203439275051	RAD21	blue	UniprotAccessions-blue_MINCH_16_h_strict_GS4_MM4	5	Cluster 1	O60216	vs_LPS	MINCH	21	1d_MINCH_10nM		blue_MINCH_16_h
16710	1d_MINCH_10nM_ctrlLPS	0.0217958976972599	0.370811539278737	LIMS1	blue	UniprotAccessions-blue_MINCH_16_h_strict_GS4_MM4	8	Cluster 2	P48059	vs_LPS	MINCH	21	1d_MINCH_10nM		blue_MINCH_16_h
16810	1d_MINCH_10nM_ctrlLPS	NA	NA	MEF2D	blue	UniprotAccessions-blue_MINCH_16_h_strict_GS4_MM4	2	Cluster 2	Q05BX2	vs_LPS	MINCH	21	1d_MINCH_10nM		blue_MINCH_16_h
16910	1d_MINCH_10nM_ctrlLPS	-0.0990101022015006	0.598503389017014	EP300	blue	UniprotAccessions-blue_MINCH_16_h_strict_GS4_MM4	6	Cluster 1	Q09472	vs_LPS	MINCH	21	1d_MINCH_10nM		blue_MINCH_16_h
17010	1d_MINCH_10nM_ctrlLPS	0.0165345231194882	0.403958444980139	NNT	blue	UniprotAccessions-blue_MINCH_16_h_strict_GS4_MM4	3	Cluster 2	Q13423	vs_LPS	MINCH	21	1d_MINCH_10nM		blue_MINCH_16_h
17110	1d_MINCH_10nM_ctrlLPS	0.0244083224952355	0.250593297893764	SLC25A24	blue	UniprotAccessions-blue_MINCH_16_h_strict_GS4_MM4	7	Cluster 2	Q6NUK1	vs_LPS	MINCH	21	1d_MINCH_10nM		blue_MINCH_16_h
17210	1d_MINCH_10nM_ctrlLPS	-0.011830879221482	0.763476310036001	MRPS31	blue	UniprotAccessions-blue_MINCH_16_h_strict_GS4_MM4	11	Cluster 2	Q92665	vs_LPS	MINCH	21	1d_MINCH_10nM		blue_MINCH_16_h
17310	1d_MINCH_10nM_ctrlLPS	-0.0370663089099714	0.122561075336664	PGM2	blue	UniprotAccessions-blue_MINCH_16_h_strict_GS4_MM4	10	Cluster 2	Q96G03	vs_LPS	MINCH	21	1d_MINCH_10nM		blue_MINCH_16_h
17410	1d_MINCH_10nM_ctrlLPS	-0.0681395987881096	0.599343412341077	EGLN1	blue	UniprotAccessions-blue_MINCH_16_h_strict_GS4_MM4	4	Cluster 1	Q9GZT9	vs_LPS	MINCH	21	1d_MINCH_10nM		blue_MINCH_16_h
17510	1d_MINCH_10nM_ctrlLPS	-0.0605966364839548	0.126102994735699	RGCC	blue	UniprotAccessions-blue_MINCH_16_h_strict_GS4_MM4	9	Cluster 2	Q9H4X1	vs_LPS	MINCH	21	1d_MINCH_10nM		blue_MINCH_16_h
17610	1d_MINCH_10nM_ctrlLPS	0.0519954762657818	0.176801709895501	MCTS1	blue	UniprotAccessions-blue_MINCH_16_h_strict_GS4_MM4	1	Cluster 2	Q9ULC4	vs_LPS	MINCH	21	1d_MINCH_10nM		blue_MINCH_16_h
15510	1d_MINCH_100nM_ctrlLPS	-0.0271959495489902	0.78560703603494	RAD21	blue	UniprotAccessions-blue_MINCH_16_h_strict_GS4_MM4	5	Cluster 1	O60216	vs_LPS	MINCH	22	1d_MINCH_100nM		blue_MINCH_16_h
15610	1d_MINCH_100nM_ctrlLPS	-0.00563515545792695	0.318227703639879	LIMS1	blue	UniprotAccessions-blue_MINCH_16_h_strict_GS4_MM4	8	Cluster 2	P48059	vs_LPS	MINCH	22	1d_MINCH_100nM		blue_MINCH_16_h
15710	1d_MINCH_100nM_ctrlLPS	NA	NA	MEF2D	blue	UniprotAccessions-blue_MINCH_16_h_strict_GS4_MM4	2	Cluster 2	Q05BX2	vs_LPS	MINCH	22	1d_MINCH_100nM		blue_MINCH_16_h
15810	1d_MINCH_100nM_ctrlLPS	-0.143518290514153	0.203719515417801	EP300	blue	UniprotAccessions-blue_MINCH_16_h_strict_GS4_MM4	6	Cluster 1	Q09472	vs_LPS	MINCH	22	1d_MINCH_100nM		blue_MINCH_16_h
15910	1d_MINCH_100nM_ctrlLPS	-0.0123269943013275	0.301533587526039	NNT	blue	UniprotAccessions-blue_MINCH_16_h_strict_GS4_MM4	3	Cluster 2	Q13423	vs_LPS	MINCH	22	1d_MINCH_100nM		blue_MINCH_16_h
16010	1d_MINCH_100nM_ctrlLPS	0.0197499583314724	0.00630811418880015	SLC25A24	blue	UniprotAccessions-blue_MINCH_16_h_strict_GS4_MM4	7	Cluster 2	Q6NUK1	vs_LPS	MINCH	22	1d_MINCH_100nM	**	blue_MINCH_16_h
16110	1d_MINCH_100nM_ctrlLPS	-0.0609655100389248	0.233693823626458	MRPS31	blue	UniprotAccessions-blue_MINCH_16_h_strict_GS4_MM4	11	Cluster 2	Q92665	vs_LPS	MINCH	22	1d_MINCH_100nM		blue_MINCH_16_h
16210	1d_MINCH_100nM_ctrlLPS	-0.0213077980260426	0.0125189615534396	PGM2	blue	UniprotAccessions-blue_MINCH_16_h_strict_GS4_MM4	10	Cluster 2	Q96G03	vs_LPS	MINCH	22	1d_MINCH_100nM	*	blue_MINCH_16_h
16310	1d_MINCH_100nM_ctrlLPS	-0.0833335488557901	0.332744949788228	EGLN1	blue	UniprotAccessions-blue_MINCH_16_h_strict_GS4_MM4	4	Cluster 1	Q9GZT9	vs_LPS	MINCH	22	1d_MINCH_100nM		blue_MINCH_16_h
16410	1d_MINCH_100nM_ctrlLPS	-0.0772635425082548	0.0458744310381747	RGCC	blue	UniprotAccessions-blue_MINCH_16_h_strict_GS4_MM4	9	Cluster 2	Q9H4X1	vs_LPS	MINCH	22	1d_MINCH_100nM	*	blue_MINCH_16_h
16510	1d_MINCH_100nM_ctrlLPS	0.0234026221098711	0.100760136925157	MCTS1	blue	UniprotAccessions-blue_MINCH_16_h_strict_GS4_MM4	1	Cluster 2	Q9ULC4	vs_LPS	MINCH	22	1d_MINCH_100nM		blue_MINCH_16_h
14410	1d_MINCH_1000nM_ctrlLPS	0.0199079160168701	0.6476204460699	RAD21	blue	UniprotAccessions-blue_MINCH_16_h_strict_GS4_MM4	5	Cluster 1	O60216	vs_LPS	MINCH	23	1d_MINCH_1000nM		blue_MINCH_16_h
14510	1d_MINCH_1000nM_ctrlLPS	-0.0111684028406704	0.285862986789852	LIMS1	blue	UniprotAccessions-blue_MINCH_16_h_strict_GS4_MM4	8	Cluster 2	P48059	vs_LPS	MINCH	23	1d_MINCH_1000nM		blue_MINCH_16_h
14610	1d_MINCH_1000nM_ctrlLPS	NA	NA	MEF2D	blue	UniprotAccessions-blue_MINCH_16_h_strict_GS4_MM4	2	Cluster 2	Q05BX2	vs_LPS	MINCH	23	1d_MINCH_1000nM		blue_MINCH_16_h
14710	1d_MINCH_1000nM_ctrlLPS	-0.0804742497743027	0.134784388321496	EP300	blue	UniprotAccessions-blue_MINCH_16_h_strict_GS4_MM4	6	Cluster 1	Q09472	vs_LPS	MINCH	23	1d_MINCH_1000nM		blue_MINCH_16_h
14810	1d_MINCH_1000nM_ctrlLPS	-0.00628500200919273	0.608734116169355	NNT	blue	UniprotAccessions-blue_MINCH_16_h_strict_GS4_MM4	3	Cluster 2	Q13423	vs_LPS	MINCH	23	1d_MINCH_1000nM		blue_MINCH_16_h
14910	1d_MINCH_1000nM_ctrlLPS	0.00208215544374216	0.543607646441969	SLC25A24	blue	UniprotAccessions-blue_MINCH_16_h_strict_GS4_MM4	7	Cluster 2	Q6NUK1	vs_LPS	MINCH	23	1d_MINCH_1000nM		blue_MINCH_16_h
15010	1d_MINCH_1000nM_ctrlLPS	-0.0306949566765636	0.358749204282592	MRPS31	blue	UniprotAccessions-blue_MINCH_16_h_strict_GS4_MM4	11	Cluster 2	Q92665	vs_LPS	MINCH	23	1d_MINCH_1000nM		blue_MINCH_16_h
15110	1d_MINCH_1000nM_ctrlLPS	-0.0188577716542228	0.137695548197955	PGM2	blue	UniprotAccessions-blue_MINCH_16_h_strict_GS4_MM4	10	Cluster 2	Q96G03	vs_LPS	MINCH	23	1d_MINCH_1000nM		blue_MINCH_16_h
15210	1d_MINCH_1000nM_ctrlLPS	-0.0256817700260254	0.597716768847121	EGLN1	blue	UniprotAccessions-blue_MINCH_16_h_strict_GS4_MM4	4	Cluster 1	Q9GZT9	vs_LPS	MINCH	23	1d_MINCH_1000nM		blue_MINCH_16_h
15310	1d_MINCH_1000nM_ctrlLPS	-0.14625759904952	0.00109438296288345	RGCC	blue	UniprotAccessions-blue_MINCH_16_h_strict_GS4_MM4	9	Cluster 2	Q9H4X1	vs_LPS	MINCH	23	1d_MINCH_1000nM	**	blue_MINCH_16_h
15410	1d_MINCH_1000nM_ctrlLPS	0.0230727243140522	0.509800037069993	MCTS1	blue	UniprotAccessions-blue_MINCH_16_h_strict_GS4_MM4	1	Cluster 2	Q9ULC4	vs_LPS	MINCH	23	1d_MINCH_1000nM		blue_MINCH_16_h
13310	1d_MINCH_10000nM_ctrlLPS	-0.0542211783899698	0.666707835910013	RAD21	blue	UniprotAccessions-blue_MINCH_16_h_strict_GS4_MM4	5	Cluster 1	O60216	vs_LPS	MINCH	24	1d_MINCH_10000nM		blue_MINCH_16_h
13410	1d_MINCH_10000nM_ctrlLPS	-0.00530615549414332	0.691447648669201	LIMS1	blue	UniprotAccessions-blue_MINCH_16_h_strict_GS4_MM4	8	Cluster 2	P48059	vs_LPS	MINCH	24	1d_MINCH_10000nM		blue_MINCH_16_h
13510	1d_MINCH_10000nM_ctrlLPS	NA	NA	MEF2D	blue	UniprotAccessions-blue_MINCH_16_h_strict_GS4_MM4	2	Cluster 2	Q05BX2	vs_LPS	MINCH	24	1d_MINCH_10000nM		blue_MINCH_16_h
13610	1d_MINCH_10000nM_ctrlLPS	-0.0175271057022271	0.937899697706994	EP300	blue	UniprotAccessions-blue_MINCH_16_h_strict_GS4_MM4	6	Cluster 1	Q09472	vs_LPS	MINCH	24	1d_MINCH_10000nM		blue_MINCH_16_h
13710	1d_MINCH_10000nM_ctrlLPS	0.00125763386166152	0.956540498770361	NNT	blue	UniprotAccessions-blue_MINCH_16_h_strict_GS4_MM4	3	Cluster 2	Q13423	vs_LPS	MINCH	24	1d_MINCH_10000nM		blue_MINCH_16_h
13810	1d_MINCH_10000nM_ctrlLPS	0.0352981192579758	0.0134117885077694	SLC25A24	blue	UniprotAccessions-blue_MINCH_16_h_strict_GS4_MM4	7	Cluster 2	Q6NUK1	vs_LPS	MINCH	24	1d_MINCH_10000nM	*	blue_MINCH_16_h
13910	1d_MINCH_10000nM_ctrlLPS	-0.00435114990176768	0.910625215678569	MRPS31	blue	UniprotAccessions-blue_MINCH_16_h_strict_GS4_MM4	11	Cluster 2	Q92665	vs_LPS	MINCH	24	1d_MINCH_10000nM		blue_MINCH_16_h
14010	1d_MINCH_10000nM_ctrlLPS	-0.0491152894234885	0.00256767846216191	PGM2	blue	UniprotAccessions-blue_MINCH_16_h_strict_GS4_MM4	10	Cluster 2	Q96G03	vs_LPS	MINCH	24	1d_MINCH_10000nM	**	blue_MINCH_16_h
14110	1d_MINCH_10000nM_ctrlLPS	-0.0323887811855327	0.713329300595405	EGLN1	blue	UniprotAccessions-blue_MINCH_16_h_strict_GS4_MM4	4	Cluster 1	Q9GZT9	vs_LPS	MINCH	24	1d_MINCH_10000nM		blue_MINCH_16_h
14210	1d_MINCH_10000nM_ctrlLPS	-0.119172834573026	0.0572621385971624	RGCC	blue	UniprotAccessions-blue_MINCH_16_h_strict_GS4_MM4	9	Cluster 2	Q9H4X1	vs_LPS	MINCH	24	1d_MINCH_10000nM		blue_MINCH_16_h
14310	1d_MINCH_10000nM_ctrlLPS	0.0311826739310024	0.474613121050513	MCTS1	blue	UniprotAccessions-blue_MINCH_16_h_strict_GS4_MM4	1	Cluster 2	Q9ULC4	vs_LPS	MINCH	24	1d_MINCH_10000nM		blue_MINCH_16_h
324	4h_DINCH_10nM_ctrlLPS	0.107508922064406	0.035674986107557	UBA6	blue	UniprotAccessions-blue_MINCH_4_h_strict_GS4_MM4	1	Cluster 1	A0AVT1	vs_LPS	DINCH	1	4h_DINCH_10nM	*	blue_MINCH_4_h
325	4h_DINCH_10nM_ctrlLPS	0.190318766598888	0.0458598687445212		blue	UniprotAccessions-blue_MINCH_4_h_strict_GS4_MM4	5	Cluster 2	E9PSI1	vs_LPS	DINCH	1	4h_DINCH_10nM	*	blue_MINCH_4_h
326	4h_DINCH_10nM_ctrlLPS	0.0993540632594861	5.89047843918405e-05	PPP6C	blue	UniprotAccessions-blue_MINCH_4_h_strict_GS4_MM4	6	Cluster 1	O00743	vs_LPS	DINCH	1	4h_DINCH_10nM	***	blue_MINCH_4_h
327	4h_DINCH_10nM_ctrlLPS	0.214059978788886	0.0329633810422786	NDUFS2	blue	UniprotAccessions-blue_MINCH_4_h_strict_GS4_MM4	16	Cluster 2	O75306	vs_LPS	DINCH	1	4h_DINCH_10nM	*	blue_MINCH_4_h
328	4h_DINCH_10nM_ctrlLPS	0.129266841333471	0.0259408957768161	UBXN7	blue	UniprotAccessions-blue_MINCH_4_h_strict_GS4_MM4	17	Cluster 1	O94888	vs_LPS	DINCH	1	4h_DINCH_10nM	*	blue_MINCH_4_h
329	4h_DINCH_10nM_ctrlLPS	0.136164352124984	0.0317786330844515	IL1B	blue	UniprotAccessions-blue_MINCH_4_h_strict_GS4_MM4	3	Cluster 1	P01584	vs_LPS	DINCH	1	4h_DINCH_10nM	*	blue_MINCH_4_h
330	4h_DINCH_10nM_ctrlLPS	0.443321164423478	0.038002446868853	ACAA1	blue	UniprotAccessions-blue_MINCH_4_h_strict_GS4_MM4	13	Cluster 2	P09110	vs_LPS	DINCH	1	4h_DINCH_10nM	*	blue_MINCH_4_h
331	4h_DINCH_10nM_ctrlLPS	0.407303489018531	0.0927044357419166	PTDSS1	blue	UniprotAccessions-blue_MINCH_4_h_strict_GS4_MM4	2	Cluster 2	P48651	vs_LPS	DINCH	1	4h_DINCH_10nM		blue_MINCH_4_h
332	4h_DINCH_10nM_ctrlLPS	0.258948622189634	0.000311390707993505	HIST2H2BF	blue	UniprotAccessions-blue_MINCH_4_h_strict_GS4_MM4	4	Cluster 2	Q5QNW6	vs_LPS	DINCH	1	4h_DINCH_10nM	***	blue_MINCH_4_h
333	4h_DINCH_10nM_ctrlLPS	0.4316161265347	0.175972964308116	ARMH3	blue	UniprotAccessions-blue_MINCH_4_h_strict_GS4_MM4	15	Cluster 2	Q5T2E6	vs_LPS	DINCH	1	4h_DINCH_10nM		blue_MINCH_4_h
334	4h_DINCH_10nM_ctrlLPS	0.549263886377609	0.0123994332031956	THEMIS2	blue	UniprotAccessions-blue_MINCH_4_h_strict_GS4_MM4	8	Cluster 2	Q5TEJ8	vs_LPS	DINCH	1	4h_DINCH_10nM	*	blue_MINCH_4_h
335	4h_DINCH_10nM_ctrlLPS	0.35950680997495	0.0377096903953731	TMEM205	blue	UniprotAccessions-blue_MINCH_4_h_strict_GS4_MM4	14	Cluster 2	Q6UW68	vs_LPS	DINCH	1	4h_DINCH_10nM	*	blue_MINCH_4_h
336	4h_DINCH_10nM_ctrlLPS	0.0719216894603287	0.0713582849768133	NUP210	blue	UniprotAccessions-blue_MINCH_4_h_strict_GS4_MM4	7	Cluster 1	Q8TEM1	vs_LPS	DINCH	1	4h_DINCH_10nM		blue_MINCH_4_h
337	4h_DINCH_10nM_ctrlLPS	0.277633432995311	0.0035281923500522	WDR11	blue	UniprotAccessions-blue_MINCH_4_h_strict_GS4_MM4	12	Cluster 2	Q9BZH6	vs_LPS	DINCH	1	4h_DINCH_10nM	**	blue_MINCH_4_h
338	4h_DINCH_10nM_ctrlLPS	0.411548363021069	0.0788884912961619	LRCH1	blue	UniprotAccessions-blue_MINCH_4_h_strict_GS4_MM4	11	Cluster 2	Q9Y2L9	vs_LPS	DINCH	1	4h_DINCH_10nM		blue_MINCH_4_h
339	4h_DINCH_10nM_ctrlLPS	0.116960086805727	0.00280941806164725	UFC1	blue	UniprotAccessions-blue_MINCH_4_h_strict_GS4_MM4	10	Cluster 1	Q9Y3C8	vs_LPS	DINCH	1	4h_DINCH_10nM	**	blue_MINCH_4_h
340	4h_DINCH_10nM_ctrlLPS	0.0541322137382556	0.0228295196901061	RPL36	blue	UniprotAccessions-blue_MINCH_4_h_strict_GS4_MM4	9	Cluster 1	Q9Y3U8	vs_LPS	DINCH	1	4h_DINCH_10nM	*	blue_MINCH_4_h
307	4h_DINCH_100nM_ctrlLPS	0.105438287974013	0.0312374032691618	UBA6	blue	UniprotAccessions-blue_MINCH_4_h_strict_GS4_MM4	1	Cluster 1	A0AVT1	vs_LPS	DINCH	2	4h_DINCH_100nM	*	blue_MINCH_4_h
308	4h_DINCH_100nM_ctrlLPS	0.207988188116082	0.028958924016142		blue	UniprotAccessions-blue_MINCH_4_h_strict_GS4_MM4	5	Cluster 2	E9PSI1	vs_LPS	DINCH	2	4h_DINCH_100nM	*	blue_MINCH_4_h
309	4h_DINCH_100nM_ctrlLPS	0.0508654387295165	0.00746628206490157	PPP6C	blue	UniprotAccessions-blue_MINCH_4_h_strict_GS4_MM4	6	Cluster 1	O00743	vs_LPS	DINCH	2	4h_DINCH_100nM	**	blue_MINCH_4_h
310	4h_DINCH_100nM_ctrlLPS	0.241521476717755	0.0129775155843281	NDUFS2	blue	UniprotAccessions-blue_MINCH_4_h_strict_GS4_MM4	16	Cluster 2	O75306	vs_LPS	DINCH	2	4h_DINCH_100nM	*	blue_MINCH_4_h
311	4h_DINCH_100nM_ctrlLPS	0.153911883382749	0.0256824543916975	UBXN7	blue	UniprotAccessions-blue_MINCH_4_h_strict_GS4_MM4	17	Cluster 1	O94888	vs_LPS	DINCH	2	4h_DINCH_100nM	*	blue_MINCH_4_h
312	4h_DINCH_100nM_ctrlLPS	0.0304252677798785	0.38584860436698	IL1B	blue	UniprotAccessions-blue_MINCH_4_h_strict_GS4_MM4	3	Cluster 1	P01584	vs_LPS	DINCH	2	4h_DINCH_100nM		blue_MINCH_4_h
313	4h_DINCH_100nM_ctrlLPS	0.433087855313233	0.0818735777887283	ACAA1	blue	UniprotAccessions-blue_MINCH_4_h_strict_GS4_MM4	13	Cluster 2	P09110	vs_LPS	DINCH	2	4h_DINCH_100nM		blue_MINCH_4_h
314	4h_DINCH_100nM_ctrlLPS	0.38622861101203	0.119032408641064	PTDSS1	blue	UniprotAccessions-blue_MINCH_4_h_strict_GS4_MM4	2	Cluster 2	P48651	vs_LPS	DINCH	2	4h_DINCH_100nM		blue_MINCH_4_h
315	4h_DINCH_100nM_ctrlLPS	0.28583031760376	0.0194678491527032	HIST2H2BF	blue	UniprotAccessions-blue_MINCH_4_h_strict_GS4_MM4	4	Cluster 2	Q5QNW6	vs_LPS	DINCH	2	4h_DINCH_100nM	*	blue_MINCH_4_h
316	4h_DINCH_100nM_ctrlLPS	0.570406638293915	0.0065670700473729	ARMH3	blue	UniprotAccessions-blue_MINCH_4_h_strict_GS4_MM4	15	Cluster 2	Q5T2E6	vs_LPS	DINCH	2	4h_DINCH_100nM	**	blue_MINCH_4_h
317	4h_DINCH_100nM_ctrlLPS	0.511588208512329	0.0399842298886883	THEMIS2	blue	UniprotAccessions-blue_MINCH_4_h_strict_GS4_MM4	8	Cluster 2	Q5TEJ8	vs_LPS	DINCH	2	4h_DINCH_100nM	*	blue_MINCH_4_h
318	4h_DINCH_100nM_ctrlLPS	0.458231587657052	0.0963413427355834	TMEM205	blue	UniprotAccessions-blue_MINCH_4_h_strict_GS4_MM4	14	Cluster 2	Q6UW68	vs_LPS	DINCH	2	4h_DINCH_100nM		blue_MINCH_4_h
319	4h_DINCH_100nM_ctrlLPS	0.133926596799928	0.0339080337624686	NUP210	blue	UniprotAccessions-blue_MINCH_4_h_strict_GS4_MM4	7	Cluster 1	Q8TEM1	vs_LPS	DINCH	2	4h_DINCH_100nM	*	blue_MINCH_4_h
320	4h_DINCH_100nM_ctrlLPS	0.335154272580781	0.00789554492731192	WDR11	blue	UniprotAccessions-blue_MINCH_4_h_strict_GS4_MM4	12	Cluster 2	Q9BZH6	vs_LPS	DINCH	2	4h_DINCH_100nM	**	blue_MINCH_4_h
321	4h_DINCH_100nM_ctrlLPS	0.361894494895995	0.0455426857475876	LRCH1	blue	UniprotAccessions-blue_MINCH_4_h_strict_GS4_MM4	11	Cluster 2	Q9Y2L9	vs_LPS	DINCH	2	4h_DINCH_100nM	*	blue_MINCH_4_h
322	4h_DINCH_100nM_ctrlLPS	0.138352198930741	0.0700609388875127	UFC1	blue	UniprotAccessions-blue_MINCH_4_h_strict_GS4_MM4	10	Cluster 1	Q9Y3C8	vs_LPS	DINCH	2	4h_DINCH_100nM		blue_MINCH_4_h
323	4h_DINCH_100nM_ctrlLPS	0.0748727392201031	0.0704766160955536	RPL36	blue	UniprotAccessions-blue_MINCH_4_h_strict_GS4_MM4	9	Cluster 1	Q9Y3U8	vs_LPS	DINCH	2	4h_DINCH_100nM		blue_MINCH_4_h
290	4h_DINCH_1000nM_ctrlLPS	0.100159727837794	0.0189807432313496	UBA6	blue	UniprotAccessions-blue_MINCH_4_h_strict_GS4_MM4	1	Cluster 1	A0AVT1	vs_LPS	DINCH	3	4h_DINCH_1000nM	*	blue_MINCH_4_h
291	4h_DINCH_1000nM_ctrlLPS	0.167397266487219	0.0884507132835982		blue	UniprotAccessions-blue_MINCH_4_h_strict_GS4_MM4	5	Cluster 2	E9PSI1	vs_LPS	DINCH	3	4h_DINCH_1000nM		blue_MINCH_4_h
292	4h_DINCH_1000nM_ctrlLPS	0.0342729323087044	0.0658548382564088	PPP6C	blue	UniprotAccessions-blue_MINCH_4_h_strict_GS4_MM4	6	Cluster 1	O00743	vs_LPS	DINCH	3	4h_DINCH_1000nM		blue_MINCH_4_h
293	4h_DINCH_1000nM_ctrlLPS	0.243687694136711	0.00895212868012545	NDUFS2	blue	UniprotAccessions-blue_MINCH_4_h_strict_GS4_MM4	16	Cluster 2	O75306	vs_LPS	DINCH	3	4h_DINCH_1000nM	**	blue_MINCH_4_h
294	4h_DINCH_1000nM_ctrlLPS	0.161784055303896	0.00564350567745547	UBXN7	blue	UniprotAccessions-blue_MINCH_4_h_strict_GS4_MM4	17	Cluster 1	O94888	vs_LPS	DINCH	3	4h_DINCH_1000nM	**	blue_MINCH_4_h
295	4h_DINCH_1000nM_ctrlLPS	0.11193835990959	0.0374561729377079	IL1B	blue	UniprotAccessions-blue_MINCH_4_h_strict_GS4_MM4	3	Cluster 1	P01584	vs_LPS	DINCH	3	4h_DINCH_1000nM	*	blue_MINCH_4_h
296	4h_DINCH_1000nM_ctrlLPS	0.522163736815491	0.0938001541010562	ACAA1	blue	UniprotAccessions-blue_MINCH_4_h_strict_GS4_MM4	13	Cluster 2	P09110	vs_LPS	DINCH	3	4h_DINCH_1000nM		blue_MINCH_4_h
297	4h_DINCH_1000nM_ctrlLPS	0.274497560832067	0.324701429950804	PTDSS1	blue	UniprotAccessions-blue_MINCH_4_h_strict_GS4_MM4	2	Cluster 2	P48651	vs_LPS	DINCH	3	4h_DINCH_1000nM		blue_MINCH_4_h
298	4h_DINCH_1000nM_ctrlLPS	0.53741011961349	0.010563528600363	HIST2H2BF	blue	UniprotAccessions-blue_MINCH_4_h_strict_GS4_MM4	4	Cluster 2	Q5QNW6	vs_LPS	DINCH	3	4h_DINCH_1000nM	*	blue_MINCH_4_h
299	4h_DINCH_1000nM_ctrlLPS	0.409164757679712	0.087953244715674	ARMH3	blue	UniprotAccessions-blue_MINCH_4_h_strict_GS4_MM4	15	Cluster 2	Q5T2E6	vs_LPS	DINCH	3	4h_DINCH_1000nM		blue_MINCH_4_h
300	4h_DINCH_1000nM_ctrlLPS	0.516471266877776	0.046520738568859	THEMIS2	blue	UniprotAccessions-blue_MINCH_4_h_strict_GS4_MM4	8	Cluster 2	Q5TEJ8	vs_LPS	DINCH	3	4h_DINCH_1000nM	*	blue_MINCH_4_h
301	4h_DINCH_1000nM_ctrlLPS	0.460894842841151	0.06048091601013	TMEM205	blue	UniprotAccessions-blue_MINCH_4_h_strict_GS4_MM4	14	Cluster 2	Q6UW68	vs_LPS	DINCH	3	4h_DINCH_1000nM		blue_MINCH_4_h
302	4h_DINCH_1000nM_ctrlLPS	0.136027388259659	0.0514031736863051	NUP210	blue	UniprotAccessions-blue_MINCH_4_h_strict_GS4_MM4	7	Cluster 1	Q8TEM1	vs_LPS	DINCH	3	4h_DINCH_1000nM		blue_MINCH_4_h
303	4h_DINCH_1000nM_ctrlLPS	0.26666532013296	0.113132313762042	WDR11	blue	UniprotAccessions-blue_MINCH_4_h_strict_GS4_MM4	12	Cluster 2	Q9BZH6	vs_LPS	DINCH	3	4h_DINCH_1000nM		blue_MINCH_4_h
304	4h_DINCH_1000nM_ctrlLPS	0.321092728554805	0.101718564581486	LRCH1	blue	UniprotAccessions-blue_MINCH_4_h_strict_GS4_MM4	11	Cluster 2	Q9Y2L9	vs_LPS	DINCH	3	4h_DINCH_1000nM		blue_MINCH_4_h
305	4h_DINCH_1000nM_ctrlLPS	0.136422643539798	0.0861483414161857	UFC1	blue	UniprotAccessions-blue_MINCH_4_h_strict_GS4_MM4	10	Cluster 1	Q9Y3C8	vs_LPS	DINCH	3	4h_DINCH_1000nM		blue_MINCH_4_h
306	4h_DINCH_1000nM_ctrlLPS	0.117194551465364	0.0786882170636724	RPL36	blue	UniprotAccessions-blue_MINCH_4_h_strict_GS4_MM4	9	Cluster 1	Q9Y3U8	vs_LPS	DINCH	3	4h_DINCH_1000nM		blue_MINCH_4_h
273	4h_DINCH_10000nM_ctrlLPS	0.0990791167440218	0.0647234630114321	UBA6	blue	UniprotAccessions-blue_MINCH_4_h_strict_GS4_MM4	1	Cluster 1	A0AVT1	vs_LPS	DINCH	4	4h_DINCH_10000nM		blue_MINCH_4_h
274	4h_DINCH_10000nM_ctrlLPS	0.196741755577758	0.0414482819080552		blue	UniprotAccessions-blue_MINCH_4_h_strict_GS4_MM4	5	Cluster 2	E9PSI1	vs_LPS	DINCH	4	4h_DINCH_10000nM	*	blue_MINCH_4_h
275	4h_DINCH_10000nM_ctrlLPS	0.0343910474803004	0.29741702413245	PPP6C	blue	UniprotAccessions-blue_MINCH_4_h_strict_GS4_MM4	6	Cluster 1	O00743	vs_LPS	DINCH	4	4h_DINCH_10000nM		blue_MINCH_4_h
276	4h_DINCH_10000nM_ctrlLPS	0.275730227298144	0.00826728907436668	NDUFS2	blue	UniprotAccessions-blue_MINCH_4_h_strict_GS4_MM4	16	Cluster 2	O75306	vs_LPS	DINCH	4	4h_DINCH_10000nM	**	blue_MINCH_4_h
277	4h_DINCH_10000nM_ctrlLPS	0.192009665790022	0.00146142621562328	UBXN7	blue	UniprotAccessions-blue_MINCH_4_h_strict_GS4_MM4	17	Cluster 1	O94888	vs_LPS	DINCH	4	4h_DINCH_10000nM	**	blue_MINCH_4_h
278	4h_DINCH_10000nM_ctrlLPS	0.108527921446546	0.151675841507085	IL1B	blue	UniprotAccessions-blue_MINCH_4_h_strict_GS4_MM4	3	Cluster 1	P01584	vs_LPS	DINCH	4	4h_DINCH_10000nM		blue_MINCH_4_h
279	4h_DINCH_10000nM_ctrlLPS	0.750883767029751	0.00376838412598334	ACAA1	blue	UniprotAccessions-blue_MINCH_4_h_strict_GS4_MM4	13	Cluster 2	P09110	vs_LPS	DINCH	4	4h_DINCH_10000nM	**	blue_MINCH_4_h
280	4h_DINCH_10000nM_ctrlLPS	0.353677010032954	0.264566398487797	PTDSS1	blue	UniprotAccessions-blue_MINCH_4_h_strict_GS4_MM4	2	Cluster 2	P48651	vs_LPS	DINCH	4	4h_DINCH_10000nM		blue_MINCH_4_h
281	4h_DINCH_10000nM_ctrlLPS	0.465322707524736	0.000249022886001002	HIST2H2BF	blue	UniprotAccessions-blue_MINCH_4_h_strict_GS4_MM4	4	Cluster 2	Q5QNW6	vs_LPS	DINCH	4	4h_DINCH_10000nM	***	blue_MINCH_4_h
282	4h_DINCH_10000nM_ctrlLPS	0.614840413061105	0.076555752687508	ARMH3	blue	UniprotAccessions-blue_MINCH_4_h_strict_GS4_MM4	15	Cluster 2	Q5T2E6	vs_LPS	DINCH	4	4h_DINCH_10000nM		blue_MINCH_4_h
283	4h_DINCH_10000nM_ctrlLPS	0.604622213953405	0.034192861662467	THEMIS2	blue	UniprotAccessions-blue_MINCH_4_h_strict_GS4_MM4	8	Cluster 2	Q5TEJ8	vs_LPS	DINCH	4	4h_DINCH_10000nM	*	blue_MINCH_4_h
284	4h_DINCH_10000nM_ctrlLPS	0.784714224615207	0.0164436927645225	TMEM205	blue	UniprotAccessions-blue_MINCH_4_h_strict_GS4_MM4	14	Cluster 2	Q6UW68	vs_LPS	DINCH	4	4h_DINCH_10000nM	*	blue_MINCH_4_h
285	4h_DINCH_10000nM_ctrlLPS	0.12650517189931	0.0769968678738555	NUP210	blue	UniprotAccessions-blue_MINCH_4_h_strict_GS4_MM4	7	Cluster 1	Q8TEM1	vs_LPS	DINCH	4	4h_DINCH_10000nM		blue_MINCH_4_h
286	4h_DINCH_10000nM_ctrlLPS	0.354486494505083	0.0667252183143814	WDR11	blue	UniprotAccessions-blue_MINCH_4_h_strict_GS4_MM4	12	Cluster 2	Q9BZH6	vs_LPS	DINCH	4	4h_DINCH_10000nM		blue_MINCH_4_h
287	4h_DINCH_10000nM_ctrlLPS	0.373708498053337	0.136139581985418	LRCH1	blue	UniprotAccessions-blue_MINCH_4_h_strict_GS4_MM4	11	Cluster 2	Q9Y2L9	vs_LPS	DINCH	4	4h_DINCH_10000nM		blue_MINCH_4_h
288	4h_DINCH_10000nM_ctrlLPS	0.0323835698166315	0.732502641459059	UFC1	blue	UniprotAccessions-blue_MINCH_4_h_strict_GS4_MM4	10	Cluster 1	Q9Y3C8	vs_LPS	DINCH	4	4h_DINCH_10000nM		blue_MINCH_4_h
289	4h_DINCH_10000nM_ctrlLPS	0.120379161510539	0.0176445602303627	RPL36	blue	UniprotAccessions-blue_MINCH_4_h_strict_GS4_MM4	9	Cluster 1	Q9Y3U8	vs_LPS	DINCH	4	4h_DINCH_10000nM	*	blue_MINCH_4_h
392	4h_MINCH_10nM_ctrlLPS	0.105023097867349	0.014435527134619	UBA6	blue	UniprotAccessions-blue_MINCH_4_h_strict_GS4_MM4	1	Cluster 1	A0AVT1	vs_LPS	MINCH	5	4h_MINCH_10nM	*	blue_MINCH_4_h
393	4h_MINCH_10nM_ctrlLPS	0.160502750075758	0.00125730506086698		blue	UniprotAccessions-blue_MINCH_4_h_strict_GS4_MM4	5	Cluster 2	E9PSI1	vs_LPS	MINCH	5	4h_MINCH_10nM	**	blue_MINCH_4_h
394	4h_MINCH_10nM_ctrlLPS	0.04049764184567	0.0237561730430468	PPP6C	blue	UniprotAccessions-blue_MINCH_4_h_strict_GS4_MM4	6	Cluster 1	O00743	vs_LPS	MINCH	5	4h_MINCH_10nM	*	blue_MINCH_4_h
395	4h_MINCH_10nM_ctrlLPS	0.218515008205465	0.00762905605552126	NDUFS2	blue	UniprotAccessions-blue_MINCH_4_h_strict_GS4_MM4	16	Cluster 2	O75306	vs_LPS	MINCH	5	4h_MINCH_10nM	**	blue_MINCH_4_h
396	4h_MINCH_10nM_ctrlLPS	0.131902198403426	0.00349501659288392	UBXN7	blue	UniprotAccessions-blue_MINCH_4_h_strict_GS4_MM4	17	Cluster 1	O94888	vs_LPS	MINCH	5	4h_MINCH_10nM	**	blue_MINCH_4_h
397	4h_MINCH_10nM_ctrlLPS	0.120761879937469	0.112251509174688	IL1B	blue	UniprotAccessions-blue_MINCH_4_h_strict_GS4_MM4	3	Cluster 1	P01584	vs_LPS	MINCH	5	4h_MINCH_10nM		blue_MINCH_4_h
398	4h_MINCH_10nM_ctrlLPS	0.238569773814468	0.000194259221445966	ACAA1	blue	UniprotAccessions-blue_MINCH_4_h_strict_GS4_MM4	13	Cluster 2	P09110	vs_LPS	MINCH	5	4h_MINCH_10nM	***	blue_MINCH_4_h
399	4h_MINCH_10nM_ctrlLPS	0.375703033674966	0.0120318722614421	PTDSS1	blue	UniprotAccessions-blue_MINCH_4_h_strict_GS4_MM4	2	Cluster 2	P48651	vs_LPS	MINCH	5	4h_MINCH_10nM	*	blue_MINCH_4_h
400	4h_MINCH_10nM_ctrlLPS	0.379523596188628	0.000275806027501945	HIST2H2BF	blue	UniprotAccessions-blue_MINCH_4_h_strict_GS4_MM4	4	Cluster 2	Q5QNW6	vs_LPS	MINCH	5	4h_MINCH_10nM	***	blue_MINCH_4_h
401	4h_MINCH_10nM_ctrlLPS	0.779011285641589	0.000192014057877033	ARMH3	blue	UniprotAccessions-blue_MINCH_4_h_strict_GS4_MM4	15	Cluster 2	Q5T2E6	vs_LPS	MINCH	5	4h_MINCH_10nM	***	blue_MINCH_4_h
402	4h_MINCH_10nM_ctrlLPS	0.417177039197709	0.0332553878605257	THEMIS2	blue	UniprotAccessions-blue_MINCH_4_h_strict_GS4_MM4	8	Cluster 2	Q5TEJ8	vs_LPS	MINCH	5	4h_MINCH_10nM	*	blue_MINCH_4_h
403	4h_MINCH_10nM_ctrlLPS	0.235129440547709	0.0671465430536326	TMEM205	blue	UniprotAccessions-blue_MINCH_4_h_strict_GS4_MM4	14	Cluster 2	Q6UW68	vs_LPS	MINCH	5	4h_MINCH_10nM		blue_MINCH_4_h
404	4h_MINCH_10nM_ctrlLPS	0.0660905093908698	0.14643755925693	NUP210	blue	UniprotAccessions-blue_MINCH_4_h_strict_GS4_MM4	7	Cluster 1	Q8TEM1	vs_LPS	MINCH	5	4h_MINCH_10nM		blue_MINCH_4_h
405	4h_MINCH_10nM_ctrlLPS	0.235648374569124	0.00159408846640822	WDR11	blue	UniprotAccessions-blue_MINCH_4_h_strict_GS4_MM4	12	Cluster 2	Q9BZH6	vs_LPS	MINCH	5	4h_MINCH_10nM	**	blue_MINCH_4_h
406	4h_MINCH_10nM_ctrlLPS	0.204494446293273	0.0348014101013917	LRCH1	blue	UniprotAccessions-blue_MINCH_4_h_strict_GS4_MM4	11	Cluster 2	Q9Y2L9	vs_LPS	MINCH	5	4h_MINCH_10nM	*	blue_MINCH_4_h
407	4h_MINCH_10nM_ctrlLPS	0.113552018135192	0.0158007792651961	UFC1	blue	UniprotAccessions-blue_MINCH_4_h_strict_GS4_MM4	10	Cluster 1	Q9Y3C8	vs_LPS	MINCH	5	4h_MINCH_10nM	*	blue_MINCH_4_h
408	4h_MINCH_10nM_ctrlLPS	0.0340396473121872	0.3438594516119	RPL36	blue	UniprotAccessions-blue_MINCH_4_h_strict_GS4_MM4	9	Cluster 1	Q9Y3U8	vs_LPS	MINCH	5	4h_MINCH_10nM		blue_MINCH_4_h
375	4h_MINCH_100nM_ctrlLPS	0.0848517535931376	0.0621936603539053	UBA6	blue	UniprotAccessions-blue_MINCH_4_h_strict_GS4_MM4	1	Cluster 1	A0AVT1	vs_LPS	MINCH	6	4h_MINCH_100nM		blue_MINCH_4_h
376	4h_MINCH_100nM_ctrlLPS	0.138740221867865	0.0867150595789161		blue	UniprotAccessions-blue_MINCH_4_h_strict_GS4_MM4	5	Cluster 2	E9PSI1	vs_LPS	MINCH	6	4h_MINCH_100nM		blue_MINCH_4_h
377	4h_MINCH_100nM_ctrlLPS	0.104910044842899	0.00436362103302638	PPP6C	blue	UniprotAccessions-blue_MINCH_4_h_strict_GS4_MM4	6	Cluster 1	O00743	vs_LPS	MINCH	6	4h_MINCH_100nM	**	blue_MINCH_4_h
378	4h_MINCH_100nM_ctrlLPS	0.255974279665738	0.013358953511557	NDUFS2	blue	UniprotAccessions-blue_MINCH_4_h_strict_GS4_MM4	16	Cluster 2	O75306	vs_LPS	MINCH	6	4h_MINCH_100nM	*	blue_MINCH_4_h
379	4h_MINCH_100nM_ctrlLPS	0.122891099614686	0.0145472605940333	UBXN7	blue	UniprotAccessions-blue_MINCH_4_h_strict_GS4_MM4	17	Cluster 1	O94888	vs_LPS	MINCH	6	4h_MINCH_100nM	*	blue_MINCH_4_h
380	4h_MINCH_100nM_ctrlLPS	0.145882934970434	0.00661264153641657	IL1B	blue	UniprotAccessions-blue_MINCH_4_h_strict_GS4_MM4	3	Cluster 1	P01584	vs_LPS	MINCH	6	4h_MINCH_100nM	**	blue_MINCH_4_h
381	4h_MINCH_100nM_ctrlLPS	0.441811999641201	0.00420047172062526	ACAA1	blue	UniprotAccessions-blue_MINCH_4_h_strict_GS4_MM4	13	Cluster 2	P09110	vs_LPS	MINCH	6	4h_MINCH_100nM	**	blue_MINCH_4_h
382	4h_MINCH_100nM_ctrlLPS	0.457024848453693	0.023436469918967	PTDSS1	blue	UniprotAccessions-blue_MINCH_4_h_strict_GS4_MM4	2	Cluster 2	P48651	vs_LPS	MINCH	6	4h_MINCH_100nM	*	blue_MINCH_4_h
383	4h_MINCH_100nM_ctrlLPS	0.372709303282594	0.000912923192296264	HIST2H2BF	blue	UniprotAccessions-blue_MINCH_4_h_strict_GS4_MM4	4	Cluster 2	Q5QNW6	vs_LPS	MINCH	6	4h_MINCH_100nM	***	blue_MINCH_4_h
384	4h_MINCH_100nM_ctrlLPS	0.70538945119189	0.0479126896080995	ARMH3	blue	UniprotAccessions-blue_MINCH_4_h_strict_GS4_MM4	15	Cluster 2	Q5T2E6	vs_LPS	MINCH	6	4h_MINCH_100nM	*	blue_MINCH_4_h
385	4h_MINCH_100nM_ctrlLPS	0.418150559179492	0.0657313835368055	THEMIS2	blue	UniprotAccessions-blue_MINCH_4_h_strict_GS4_MM4	8	Cluster 2	Q5TEJ8	vs_LPS	MINCH	6	4h_MINCH_100nM		blue_MINCH_4_h
386	4h_MINCH_100nM_ctrlLPS	0.647065972443173	0.0226802633119802	TMEM205	blue	UniprotAccessions-blue_MINCH_4_h_strict_GS4_MM4	14	Cluster 2	Q6UW68	vs_LPS	MINCH	6	4h_MINCH_100nM	*	blue_MINCH_4_h
387	4h_MINCH_100nM_ctrlLPS	0.172233406014365	0.0101032223923848	NUP210	blue	UniprotAccessions-blue_MINCH_4_h_strict_GS4_MM4	7	Cluster 1	Q8TEM1	vs_LPS	MINCH	6	4h_MINCH_100nM	*	blue_MINCH_4_h
388	4h_MINCH_100nM_ctrlLPS	0.372044908207677	0.0761981382525845	WDR11	blue	UniprotAccessions-blue_MINCH_4_h_strict_GS4_MM4	12	Cluster 2	Q9BZH6	vs_LPS	MINCH	6	4h_MINCH_100nM		blue_MINCH_4_h
389	4h_MINCH_100nM_ctrlLPS	0.30562148585437	0.0530158636327826	LRCH1	blue	UniprotAccessions-blue_MINCH_4_h_strict_GS4_MM4	11	Cluster 2	Q9Y2L9	vs_LPS	MINCH	6	4h_MINCH_100nM		blue_MINCH_4_h
390	4h_MINCH_100nM_ctrlLPS	0.129871074599734	0.00311378917610749	UFC1	blue	UniprotAccessions-blue_MINCH_4_h_strict_GS4_MM4	10	Cluster 1	Q9Y3C8	vs_LPS	MINCH	6	4h_MINCH_100nM	**	blue_MINCH_4_h
391	4h_MINCH_100nM_ctrlLPS	0.152581654007026	0.0389807916161597	RPL36	blue	UniprotAccessions-blue_MINCH_4_h_strict_GS4_MM4	9	Cluster 1	Q9Y3U8	vs_LPS	MINCH	6	4h_MINCH_100nM	*	blue_MINCH_4_h
358	4h_MINCH_1000nM_ctrlLPS	0.144570128606283	0.075151054053018	UBA6	blue	UniprotAccessions-blue_MINCH_4_h_strict_GS4_MM4	1	Cluster 1	A0AVT1	vs_LPS	MINCH	7	4h_MINCH_1000nM		blue_MINCH_4_h
359	4h_MINCH_1000nM_ctrlLPS	0.254883965591864	0.0360861198531319		blue	UniprotAccessions-blue_MINCH_4_h_strict_GS4_MM4	5	Cluster 2	E9PSI1	vs_LPS	MINCH	7	4h_MINCH_1000nM	*	blue_MINCH_4_h
360	4h_MINCH_1000nM_ctrlLPS	0.11062125774339	0.166144374231899	PPP6C	blue	UniprotAccessions-blue_MINCH_4_h_strict_GS4_MM4	6	Cluster 1	O00743	vs_LPS	MINCH	7	4h_MINCH_1000nM		blue_MINCH_4_h
361	4h_MINCH_1000nM_ctrlLPS	0.243382676517321	0.0651767982801996	NDUFS2	blue	UniprotAccessions-blue_MINCH_4_h_strict_GS4_MM4	16	Cluster 2	O75306	vs_LPS	MINCH	7	4h_MINCH_1000nM		blue_MINCH_4_h
362	4h_MINCH_1000nM_ctrlLPS	0.189175012170777	0.00629432018536702	UBXN7	blue	UniprotAccessions-blue_MINCH_4_h_strict_GS4_MM4	17	Cluster 1	O94888	vs_LPS	MINCH	7	4h_MINCH_1000nM	**	blue_MINCH_4_h
363	4h_MINCH_1000nM_ctrlLPS	0.225326766114128	0.00752523629232144	IL1B	blue	UniprotAccessions-blue_MINCH_4_h_strict_GS4_MM4	3	Cluster 1	P01584	vs_LPS	MINCH	7	4h_MINCH_1000nM	**	blue_MINCH_4_h
364	4h_MINCH_1000nM_ctrlLPS	0.668740048130667	0.00345191059671045	ACAA1	blue	UniprotAccessions-blue_MINCH_4_h_strict_GS4_MM4	13	Cluster 2	P09110	vs_LPS	MINCH	7	4h_MINCH_1000nM	**	blue_MINCH_4_h
365	4h_MINCH_1000nM_ctrlLPS	0.666747312616467	0.003495787102858	PTDSS1	blue	UniprotAccessions-blue_MINCH_4_h_strict_GS4_MM4	2	Cluster 2	P48651	vs_LPS	MINCH	7	4h_MINCH_1000nM	**	blue_MINCH_4_h
366	4h_MINCH_1000nM_ctrlLPS	0.503531305715346	0.00583764698313878	HIST2H2BF	blue	UniprotAccessions-blue_MINCH_4_h_strict_GS4_MM4	4	Cluster 2	Q5QNW6	vs_LPS	MINCH	7	4h_MINCH_1000nM	**	blue_MINCH_4_h
367	4h_MINCH_1000nM_ctrlLPS	0.655426268195259	0.033321220985536	ARMH3	blue	UniprotAccessions-blue_MINCH_4_h_strict_GS4_MM4	15	Cluster 2	Q5T2E6	vs_LPS	MINCH	7	4h_MINCH_1000nM	*	blue_MINCH_4_h
368	4h_MINCH_1000nM_ctrlLPS	0.480608308039773	0.0690006548435677	THEMIS2	blue	UniprotAccessions-blue_MINCH_4_h_strict_GS4_MM4	8	Cluster 2	Q5TEJ8	vs_LPS	MINCH	7	4h_MINCH_1000nM		blue_MINCH_4_h
369	4h_MINCH_1000nM_ctrlLPS	0.441782720146295	0.0456161203746216	TMEM205	blue	UniprotAccessions-blue_MINCH_4_h_strict_GS4_MM4	14	Cluster 2	Q6UW68	vs_LPS	MINCH	7	4h_MINCH_1000nM	*	blue_MINCH_4_h
370	4h_MINCH_1000nM_ctrlLPS	0.162478215375716	0.0426735198573361	NUP210	blue	UniprotAccessions-blue_MINCH_4_h_strict_GS4_MM4	7	Cluster 1	Q8TEM1	vs_LPS	MINCH	7	4h_MINCH_1000nM	*	blue_MINCH_4_h
371	4h_MINCH_1000nM_ctrlLPS	0.76920655878547	0.22692003009497	WDR11	blue	UniprotAccessions-blue_MINCH_4_h_strict_GS4_MM4	12	Cluster 2	Q9BZH6	vs_LPS	MINCH	7	4h_MINCH_1000nM		blue_MINCH_4_h
372	4h_MINCH_1000nM_ctrlLPS	0.425459860541217	0.0437420245752308	LRCH1	blue	UniprotAccessions-blue_MINCH_4_h_strict_GS4_MM4	11	Cluster 2	Q9Y2L9	vs_LPS	MINCH	7	4h_MINCH_1000nM	*	blue_MINCH_4_h
373	4h_MINCH_1000nM_ctrlLPS	0.132655645113683	0.148569205951458	UFC1	blue	UniprotAccessions-blue_MINCH_4_h_strict_GS4_MM4	10	Cluster 1	Q9Y3C8	vs_LPS	MINCH	7	4h_MINCH_1000nM		blue_MINCH_4_h
374	4h_MINCH_1000nM_ctrlLPS	0.152344972207003	0.0708648775530004	RPL36	blue	UniprotAccessions-blue_MINCH_4_h_strict_GS4_MM4	9	Cluster 1	Q9Y3U8	vs_LPS	MINCH	7	4h_MINCH_1000nM		blue_MINCH_4_h
341	4h_MINCH_10000nM_ctrlLPS	0.128557484205786	0.0623169445145645	UBA6	blue	UniprotAccessions-blue_MINCH_4_h_strict_GS4_MM4	1	Cluster 1	A0AVT1	vs_LPS	MINCH	8	4h_MINCH_10000nM		blue_MINCH_4_h
342	4h_MINCH_10000nM_ctrlLPS	0.294792644696812	0.00152187638201149		blue	UniprotAccessions-blue_MINCH_4_h_strict_GS4_MM4	5	Cluster 2	E9PSI1	vs_LPS	MINCH	8	4h_MINCH_10000nM	**	blue_MINCH_4_h
343	4h_MINCH_10000nM_ctrlLPS	0.0685395414835276	0.241549190610584	PPP6C	blue	UniprotAccessions-blue_MINCH_4_h_strict_GS4_MM4	6	Cluster 1	O00743	vs_LPS	MINCH	8	4h_MINCH_10000nM		blue_MINCH_4_h
344	4h_MINCH_10000nM_ctrlLPS	0.293032931303207	0.0216869741730781	NDUFS2	blue	UniprotAccessions-blue_MINCH_4_h_strict_GS4_MM4	16	Cluster 2	O75306	vs_LPS	MINCH	8	4h_MINCH_10000nM	*	blue_MINCH_4_h
345	4h_MINCH_10000nM_ctrlLPS	0.208409372292772	0.00514685226017063	UBXN7	blue	UniprotAccessions-blue_MINCH_4_h_strict_GS4_MM4	17	Cluster 1	O94888	vs_LPS	MINCH	8	4h_MINCH_10000nM	**	blue_MINCH_4_h
346	4h_MINCH_10000nM_ctrlLPS	0.179315357856884	0.00651748413682169	IL1B	blue	UniprotAccessions-blue_MINCH_4_h_strict_GS4_MM4	3	Cluster 1	P01584	vs_LPS	MINCH	8	4h_MINCH_10000nM	**	blue_MINCH_4_h
347	4h_MINCH_10000nM_ctrlLPS	0.654397784414558	0.0305141610406271	ACAA1	blue	UniprotAccessions-blue_MINCH_4_h_strict_GS4_MM4	13	Cluster 2	P09110	vs_LPS	MINCH	8	4h_MINCH_10000nM	*	blue_MINCH_4_h
348	4h_MINCH_10000nM_ctrlLPS	0.443043941595371	0.188984659092835	PTDSS1	blue	UniprotAccessions-blue_MINCH_4_h_strict_GS4_MM4	2	Cluster 2	P48651	vs_LPS	MINCH	8	4h_MINCH_10000nM		blue_MINCH_4_h
349	4h_MINCH_10000nM_ctrlLPS	0.644893571491577	0.00849332547639726	HIST2H2BF	blue	UniprotAccessions-blue_MINCH_4_h_strict_GS4_MM4	4	Cluster 2	Q5QNW6	vs_LPS	MINCH	8	4h_MINCH_10000nM	**	blue_MINCH_4_h
350	4h_MINCH_10000nM_ctrlLPS	0.614002494602137	0.0275690841525945	ARMH3	blue	UniprotAccessions-blue_MINCH_4_h_strict_GS4_MM4	15	Cluster 2	Q5T2E6	vs_LPS	MINCH	8	4h_MINCH_10000nM	*	blue_MINCH_4_h
351	4h_MINCH_10000nM_ctrlLPS	0.65093209663292	0.0234532119679689	THEMIS2	blue	UniprotAccessions-blue_MINCH_4_h_strict_GS4_MM4	8	Cluster 2	Q5TEJ8	vs_LPS	MINCH	8	4h_MINCH_10000nM	*	blue_MINCH_4_h
352	4h_MINCH_10000nM_ctrlLPS	0.716667428999177	0.00602794601670922	TMEM205	blue	UniprotAccessions-blue_MINCH_4_h_strict_GS4_MM4	14	Cluster 2	Q6UW68	vs_LPS	MINCH	8	4h_MINCH_10000nM	**	blue_MINCH_4_h
353	4h_MINCH_10000nM_ctrlLPS	0.116103160430066	0.101948387154097	NUP210	blue	UniprotAccessions-blue_MINCH_4_h_strict_GS4_MM4	7	Cluster 1	Q8TEM1	vs_LPS	MINCH	8	4h_MINCH_10000nM		blue_MINCH_4_h
354	4h_MINCH_10000nM_ctrlLPS	0.394864980547948	0.00897925187334886	WDR11	blue	UniprotAccessions-blue_MINCH_4_h_strict_GS4_MM4	12	Cluster 2	Q9BZH6	vs_LPS	MINCH	8	4h_MINCH_10000nM	**	blue_MINCH_4_h
355	4h_MINCH_10000nM_ctrlLPS	0.336426539087711	0.0649412580996121	LRCH1	blue	UniprotAccessions-blue_MINCH_4_h_strict_GS4_MM4	11	Cluster 2	Q9Y2L9	vs_LPS	MINCH	8	4h_MINCH_10000nM		blue_MINCH_4_h
356	4h_MINCH_10000nM_ctrlLPS	0.204825525530512	0.0128814932495703	UFC1	blue	UniprotAccessions-blue_MINCH_4_h_strict_GS4_MM4	10	Cluster 1	Q9Y3C8	vs_LPS	MINCH	8	4h_MINCH_10000nM	*	blue_MINCH_4_h
357	4h_MINCH_10000nM_ctrlLPS	0.216936002795917	3.8050481705814e-05	RPL36	blue	UniprotAccessions-blue_MINCH_4_h_strict_GS4_MM4	9	Cluster 1	Q9Y3U8	vs_LPS	MINCH	8	4h_MINCH_10000nM	***	blue_MINCH_4_h
5212	16h_DINCH_10nM_ctrlLPS	0.0371728297768347	0.491768884537426	UBA6	blue	UniprotAccessions-blue_MINCH_4_h_strict_GS4_MM4	1	Cluster 1	A0AVT1	vs_LPS	DINCH	9	16h_DINCH_10nM		blue_MINCH_4_h
5312	16h_DINCH_10nM_ctrlLPS	0.00340310522126707	0.930601806014503		blue	UniprotAccessions-blue_MINCH_4_h_strict_GS4_MM4	5	Cluster 2	E9PSI1	vs_LPS	DINCH	9	16h_DINCH_10nM		blue_MINCH_4_h
5412	16h_DINCH_10nM_ctrlLPS	-0.044614208889712	0.117439790874125	PPP6C	blue	UniprotAccessions-blue_MINCH_4_h_strict_GS4_MM4	6	Cluster 1	O00743	vs_LPS	DINCH	9	16h_DINCH_10nM		blue_MINCH_4_h
5512	16h_DINCH_10nM_ctrlLPS	0.00653872396883477	0.854802225400801	NDUFS2	blue	UniprotAccessions-blue_MINCH_4_h_strict_GS4_MM4	16	Cluster 2	O75306	vs_LPS	DINCH	9	16h_DINCH_10nM		blue_MINCH_4_h
5612	16h_DINCH_10nM_ctrlLPS	0.0190501005936039	0.497811580542079	UBXN7	blue	UniprotAccessions-blue_MINCH_4_h_strict_GS4_MM4	17	Cluster 1	O94888	vs_LPS	DINCH	9	16h_DINCH_10nM		blue_MINCH_4_h
5712	16h_DINCH_10nM_ctrlLPS	0.0638414015518569	0.00117279212767506	IL1B	blue	UniprotAccessions-blue_MINCH_4_h_strict_GS4_MM4	3	Cluster 1	P01584	vs_LPS	DINCH	9	16h_DINCH_10nM	**	blue_MINCH_4_h
5812	16h_DINCH_10nM_ctrlLPS	0.0359709637618727	0.264658384824436	ACAA1	blue	UniprotAccessions-blue_MINCH_4_h_strict_GS4_MM4	13	Cluster 2	P09110	vs_LPS	DINCH	9	16h_DINCH_10nM		blue_MINCH_4_h
5912	16h_DINCH_10nM_ctrlLPS	-0.0802180453380728	0.17183765986969	PTDSS1	blue	UniprotAccessions-blue_MINCH_4_h_strict_GS4_MM4	2	Cluster 2	P48651	vs_LPS	DINCH	9	16h_DINCH_10nM		blue_MINCH_4_h
6012	16h_DINCH_10nM_ctrlLPS	0.0933562266850367	0.600962154117248	HIST2H2BF	blue	UniprotAccessions-blue_MINCH_4_h_strict_GS4_MM4	4	Cluster 2	Q5QNW6	vs_LPS	DINCH	9	16h_DINCH_10nM		blue_MINCH_4_h
6112	16h_DINCH_10nM_ctrlLPS	0.0234831972881503	0.714546136999611	ARMH3	blue	UniprotAccessions-blue_MINCH_4_h_strict_GS4_MM4	15	Cluster 2	Q5T2E6	vs_LPS	DINCH	9	16h_DINCH_10nM		blue_MINCH_4_h
6212	16h_DINCH_10nM_ctrlLPS	0.0235783121310899	0.595080908653815	THEMIS2	blue	UniprotAccessions-blue_MINCH_4_h_strict_GS4_MM4	8	Cluster 2	Q5TEJ8	vs_LPS	DINCH	9	16h_DINCH_10nM		blue_MINCH_4_h
6312	16h_DINCH_10nM_ctrlLPS	-0.0141883655782533	0.481927297711102	TMEM205	blue	UniprotAccessions-blue_MINCH_4_h_strict_GS4_MM4	14	Cluster 2	Q6UW68	vs_LPS	DINCH	9	16h_DINCH_10nM		blue_MINCH_4_h
6412	16h_DINCH_10nM_ctrlLPS	-0.183424709247121	0.000128893910909233	NUP210	blue	UniprotAccessions-blue_MINCH_4_h_strict_GS4_MM4	7	Cluster 1	Q8TEM1	vs_LPS	DINCH	9	16h_DINCH_10nM	***	blue_MINCH_4_h
6512	16h_DINCH_10nM_ctrlLPS	-0.0255042978200705	0.715107971577157	WDR11	blue	UniprotAccessions-blue_MINCH_4_h_strict_GS4_MM4	12	Cluster 2	Q9BZH6	vs_LPS	DINCH	9	16h_DINCH_10nM		blue_MINCH_4_h
6612	16h_DINCH_10nM_ctrlLPS	0.0170335819137786	0.768963635495282	LRCH1	blue	UniprotAccessions-blue_MINCH_4_h_strict_GS4_MM4	11	Cluster 2	Q9Y2L9	vs_LPS	DINCH	9	16h_DINCH_10nM		blue_MINCH_4_h
6712	16h_DINCH_10nM_ctrlLPS	-0.0267095899994703	0.0694861772192859	UFC1	blue	UniprotAccessions-blue_MINCH_4_h_strict_GS4_MM4	10	Cluster 1	Q9Y3C8	vs_LPS	DINCH	9	16h_DINCH_10nM		blue_MINCH_4_h
6812	16h_DINCH_10nM_ctrlLPS	-0.0159449735862434	0.31006932818316	RPL36	blue	UniprotAccessions-blue_MINCH_4_h_strict_GS4_MM4	9	Cluster 1	Q9Y3U8	vs_LPS	DINCH	9	16h_DINCH_10nM		blue_MINCH_4_h
3512	16h_DINCH_100nM_ctrlLPS	0.00419347032142996	0.832424581651071	UBA6	blue	UniprotAccessions-blue_MINCH_4_h_strict_GS4_MM4	1	Cluster 1	A0AVT1	vs_LPS	DINCH	10	16h_DINCH_100nM		blue_MINCH_4_h
3612	16h_DINCH_100nM_ctrlLPS	0.0610736580961573	0.222712801445159		blue	UniprotAccessions-blue_MINCH_4_h_strict_GS4_MM4	5	Cluster 2	E9PSI1	vs_LPS	DINCH	10	16h_DINCH_100nM		blue_MINCH_4_h
3712	16h_DINCH_100nM_ctrlLPS	-0.0132620937510973	0.529649211977436	PPP6C	blue	UniprotAccessions-blue_MINCH_4_h_strict_GS4_MM4	6	Cluster 1	O00743	vs_LPS	DINCH	10	16h_DINCH_100nM		blue_MINCH_4_h
3812	16h_DINCH_100nM_ctrlLPS	0.0272046350522899	0.449938265423401	NDUFS2	blue	UniprotAccessions-blue_MINCH_4_h_strict_GS4_MM4	16	Cluster 2	O75306	vs_LPS	DINCH	10	16h_DINCH_100nM		blue_MINCH_4_h
3912	16h_DINCH_100nM_ctrlLPS	0.026903462398239	0.437321954393155	UBXN7	blue	UniprotAccessions-blue_MINCH_4_h_strict_GS4_MM4	17	Cluster 1	O94888	vs_LPS	DINCH	10	16h_DINCH_100nM		blue_MINCH_4_h
4012	16h_DINCH_100nM_ctrlLPS	0.0628917743622555	0.0484404646261102	IL1B	blue	UniprotAccessions-blue_MINCH_4_h_strict_GS4_MM4	3	Cluster 1	P01584	vs_LPS	DINCH	10	16h_DINCH_100nM	*	blue_MINCH_4_h
4112	16h_DINCH_100nM_ctrlLPS	0.0956717684130109	0.149972561267962	ACAA1	blue	UniprotAccessions-blue_MINCH_4_h_strict_GS4_MM4	13	Cluster 2	P09110	vs_LPS	DINCH	10	16h_DINCH_100nM		blue_MINCH_4_h
4212	16h_DINCH_100nM_ctrlLPS	0.0561355344357041	0.0487248638390899	PTDSS1	blue	UniprotAccessions-blue_MINCH_4_h_strict_GS4_MM4	2	Cluster 2	P48651	vs_LPS	DINCH	10	16h_DINCH_100nM	*	blue_MINCH_4_h
4312	16h_DINCH_100nM_ctrlLPS	0.0181997872675151	0.596307267546133	HIST2H2BF	blue	UniprotAccessions-blue_MINCH_4_h_strict_GS4_MM4	4	Cluster 2	Q5QNW6	vs_LPS	DINCH	10	16h_DINCH_100nM		blue_MINCH_4_h
4412	16h_DINCH_100nM_ctrlLPS	0.0551636524051945	0.0937103458058553	ARMH3	blue	UniprotAccessions-blue_MINCH_4_h_strict_GS4_MM4	15	Cluster 2	Q5T2E6	vs_LPS	DINCH	10	16h_DINCH_100nM		blue_MINCH_4_h
4512	16h_DINCH_100nM_ctrlLPS	-0.0208558759064298	0.175187412700249	THEMIS2	blue	UniprotAccessions-blue_MINCH_4_h_strict_GS4_MM4	8	Cluster 2	Q5TEJ8	vs_LPS	DINCH	10	16h_DINCH_100nM		blue_MINCH_4_h
4612	16h_DINCH_100nM_ctrlLPS	-0.0126207066956146	0.702628709085987	TMEM205	blue	UniprotAccessions-blue_MINCH_4_h_strict_GS4_MM4	14	Cluster 2	Q6UW68	vs_LPS	DINCH	10	16h_DINCH_100nM		blue_MINCH_4_h
4712	16h_DINCH_100nM_ctrlLPS	-0.159250143733082	0.00527169110458226	NUP210	blue	UniprotAccessions-blue_MINCH_4_h_strict_GS4_MM4	7	Cluster 1	Q8TEM1	vs_LPS	DINCH	10	16h_DINCH_100nM	**	blue_MINCH_4_h
4812	16h_DINCH_100nM_ctrlLPS	0.0290003854482039	0.701805951031598	WDR11	blue	UniprotAccessions-blue_MINCH_4_h_strict_GS4_MM4	12	Cluster 2	Q9BZH6	vs_LPS	DINCH	10	16h_DINCH_100nM		blue_MINCH_4_h
4912	16h_DINCH_100nM_ctrlLPS	-0.0297894973235561	0.249244780840706	LRCH1	blue	UniprotAccessions-blue_MINCH_4_h_strict_GS4_MM4	11	Cluster 2	Q9Y2L9	vs_LPS	DINCH	10	16h_DINCH_100nM		blue_MINCH_4_h
5012	16h_DINCH_100nM_ctrlLPS	-0.0751869121350522	0.0343607544334746	UFC1	blue	UniprotAccessions-blue_MINCH_4_h_strict_GS4_MM4	10	Cluster 1	Q9Y3C8	vs_LPS	DINCH	10	16h_DINCH_100nM	*	blue_MINCH_4_h
5112	16h_DINCH_100nM_ctrlLPS	0.00440654884790563	0.895714115282614	RPL36	blue	UniprotAccessions-blue_MINCH_4_h_strict_GS4_MM4	9	Cluster 1	Q9Y3U8	vs_LPS	DINCH	10	16h_DINCH_100nM		blue_MINCH_4_h
18102	16h_DINCH_1000nM_ctrlLPS	-0.00854284937109309	0.676957206233675	UBA6	blue	UniprotAccessions-blue_MINCH_4_h_strict_GS4_MM4	1	Cluster 1	A0AVT1	vs_LPS	DINCH	11	16h_DINCH_1000nM		blue_MINCH_4_h
19102	16h_DINCH_1000nM_ctrlLPS	0.0267334807954412	0.268817045159363		blue	UniprotAccessions-blue_MINCH_4_h_strict_GS4_MM4	5	Cluster 2	E9PSI1	vs_LPS	DINCH	11	16h_DINCH_1000nM		blue_MINCH_4_h
20102	16h_DINCH_1000nM_ctrlLPS	-0.0745045388565971	0.106092735032783	PPP6C	blue	UniprotAccessions-blue_MINCH_4_h_strict_GS4_MM4	6	Cluster 1	O00743	vs_LPS	DINCH	11	16h_DINCH_1000nM		blue_MINCH_4_h
21102	16h_DINCH_1000nM_ctrlLPS	0.0206900538330915	0.44357800318536	NDUFS2	blue	UniprotAccessions-blue_MINCH_4_h_strict_GS4_MM4	16	Cluster 2	O75306	vs_LPS	DINCH	11	16h_DINCH_1000nM		blue_MINCH_4_h
22102	16h_DINCH_1000nM_ctrlLPS	0.0516792520807707	0.169282461187949	UBXN7	blue	UniprotAccessions-blue_MINCH_4_h_strict_GS4_MM4	17	Cluster 1	O94888	vs_LPS	DINCH	11	16h_DINCH_1000nM		blue_MINCH_4_h
23102	16h_DINCH_1000nM_ctrlLPS	0.0578121433779656	0.0824778579505166	IL1B	blue	UniprotAccessions-blue_MINCH_4_h_strict_GS4_MM4	3	Cluster 1	P01584	vs_LPS	DINCH	11	16h_DINCH_1000nM		blue_MINCH_4_h
24102	16h_DINCH_1000nM_ctrlLPS	0.000532314077452155	0.981647497078991	ACAA1	blue	UniprotAccessions-blue_MINCH_4_h_strict_GS4_MM4	13	Cluster 2	P09110	vs_LPS	DINCH	11	16h_DINCH_1000nM		blue_MINCH_4_h
25102	16h_DINCH_1000nM_ctrlLPS	0.00409743201902495	0.956373608791448	PTDSS1	blue	UniprotAccessions-blue_MINCH_4_h_strict_GS4_MM4	2	Cluster 2	P48651	vs_LPS	DINCH	11	16h_DINCH_1000nM		blue_MINCH_4_h
26102	16h_DINCH_1000nM_ctrlLPS	0.101986647958481	0.0750440942125852	HIST2H2BF	blue	UniprotAccessions-blue_MINCH_4_h_strict_GS4_MM4	4	Cluster 2	Q5QNW6	vs_LPS	DINCH	11	16h_DINCH_1000nM		blue_MINCH_4_h
2765	16h_DINCH_1000nM_ctrlLPS	-0.0768704162124086	0.370224533190504	ARMH3	blue	UniprotAccessions-blue_MINCH_4_h_strict_GS4_MM4	15	Cluster 2	Q5T2E6	vs_LPS	DINCH	11	16h_DINCH_1000nM		blue_MINCH_4_h
2812	16h_DINCH_1000nM_ctrlLPS	-0.0574297600377181	0.279719267851192	THEMIS2	blue	UniprotAccessions-blue_MINCH_4_h_strict_GS4_MM4	8	Cluster 2	Q5TEJ8	vs_LPS	DINCH	11	16h_DINCH_1000nM		blue_MINCH_4_h
2912	16h_DINCH_1000nM_ctrlLPS	0.00426940234358031	0.926635464541987	TMEM205	blue	UniprotAccessions-blue_MINCH_4_h_strict_GS4_MM4	14	Cluster 2	Q6UW68	vs_LPS	DINCH	11	16h_DINCH_1000nM		blue_MINCH_4_h
3012	16h_DINCH_1000nM_ctrlLPS	-0.0981352492431131	0.0560445607888746	NUP210	blue	UniprotAccessions-blue_MINCH_4_h_strict_GS4_MM4	7	Cluster 1	Q8TEM1	vs_LPS	DINCH	11	16h_DINCH_1000nM		blue_MINCH_4_h
3112	16h_DINCH_1000nM_ctrlLPS	-0.0793606918878441	0.267435521498488	WDR11	blue	UniprotAccessions-blue_MINCH_4_h_strict_GS4_MM4	12	Cluster 2	Q9BZH6	vs_LPS	DINCH	11	16h_DINCH_1000nM		blue_MINCH_4_h
3212	16h_DINCH_1000nM_ctrlLPS	-0.0910007306804708	0.00145930065217849	LRCH1	blue	UniprotAccessions-blue_MINCH_4_h_strict_GS4_MM4	11	Cluster 2	Q9Y2L9	vs_LPS	DINCH	11	16h_DINCH_1000nM	**	blue_MINCH_4_h
3312	16h_DINCH_1000nM_ctrlLPS	0.0511208812339706	0.16115433986595	UFC1	blue	UniprotAccessions-blue_MINCH_4_h_strict_GS4_MM4	10	Cluster 1	Q9Y3C8	vs_LPS	DINCH	11	16h_DINCH_1000nM		blue_MINCH_4_h
3412	16h_DINCH_1000nM_ctrlLPS	0.0132023126434008	0.784301115276562	RPL36	blue	UniprotAccessions-blue_MINCH_4_h_strict_GS4_MM4	9	Cluster 1	Q9Y3U8	vs_LPS	DINCH	11	16h_DINCH_1000nM		blue_MINCH_4_h
11002	16h_DINCH_10000nM_ctrlLPS	-0.0082050184118765	0.532561306842094	UBA6	blue	UniprotAccessions-blue_MINCH_4_h_strict_GS4_MM4	1	Cluster 1	A0AVT1	vs_LPS	DINCH	12	16h_DINCH_10000nM		blue_MINCH_4_h
2766	16h_DINCH_10000nM_ctrlLPS	0.0618353907084258	0.015794731418423		blue	UniprotAccessions-blue_MINCH_4_h_strict_GS4_MM4	5	Cluster 2	E9PSI1	vs_LPS	DINCH	12	16h_DINCH_10000nM	*	blue_MINCH_4_h
3102	16h_DINCH_10000nM_ctrlLPS	-0.0895849186339123	0.129768945771525	PPP6C	blue	UniprotAccessions-blue_MINCH_4_h_strict_GS4_MM4	6	Cluster 1	O00743	vs_LPS	DINCH	12	16h_DINCH_10000nM		blue_MINCH_4_h
4102	16h_DINCH_10000nM_ctrlLPS	0.0432517136426955	0.477743125494494	NDUFS2	blue	UniprotAccessions-blue_MINCH_4_h_strict_GS4_MM4	16	Cluster 2	O75306	vs_LPS	DINCH	12	16h_DINCH_10000nM		blue_MINCH_4_h
5102	16h_DINCH_10000nM_ctrlLPS	0.0675516718194202	0.0552324897928689	UBXN7	blue	UniprotAccessions-blue_MINCH_4_h_strict_GS4_MM4	17	Cluster 1	O94888	vs_LPS	DINCH	12	16h_DINCH_10000nM		blue_MINCH_4_h
6102	16h_DINCH_10000nM_ctrlLPS	0.103369121774121	0.00028314073600998	IL1B	blue	UniprotAccessions-blue_MINCH_4_h_strict_GS4_MM4	3	Cluster 1	P01584	vs_LPS	DINCH	12	16h_DINCH_10000nM	***	blue_MINCH_4_h
7102	16h_DINCH_10000nM_ctrlLPS	0.0487405760935468	0.150695445784901	ACAA1	blue	UniprotAccessions-blue_MINCH_4_h_strict_GS4_MM4	13	Cluster 2	P09110	vs_LPS	DINCH	12	16h_DINCH_10000nM		blue_MINCH_4_h
8102	16h_DINCH_10000nM_ctrlLPS	-0.00521668777408854	0.963232945213782	PTDSS1	blue	UniprotAccessions-blue_MINCH_4_h_strict_GS4_MM4	2	Cluster 2	P48651	vs_LPS	DINCH	12	16h_DINCH_10000nM		blue_MINCH_4_h
9102	16h_DINCH_10000nM_ctrlLPS	0.0950392135874114	0.486247057737528	HIST2H2BF	blue	UniprotAccessions-blue_MINCH_4_h_strict_GS4_MM4	4	Cluster 2	Q5QNW6	vs_LPS	DINCH	12	16h_DINCH_10000nM		blue_MINCH_4_h
10102	16h_DINCH_10000nM_ctrlLPS	0.0979616802571445	0.291187408491734	ARMH3	blue	UniprotAccessions-blue_MINCH_4_h_strict_GS4_MM4	15	Cluster 2	Q5T2E6	vs_LPS	DINCH	12	16h_DINCH_10000nM		blue_MINCH_4_h
11102	16h_DINCH_10000nM_ctrlLPS	0.0782235559998399	0.348836965642006	THEMIS2	blue	UniprotAccessions-blue_MINCH_4_h_strict_GS4_MM4	8	Cluster 2	Q5TEJ8	vs_LPS	DINCH	12	16h_DINCH_10000nM		blue_MINCH_4_h
12102	16h_DINCH_10000nM_ctrlLPS	0.17190386888816	0.0125735222767117	TMEM205	blue	UniprotAccessions-blue_MINCH_4_h_strict_GS4_MM4	14	Cluster 2	Q6UW68	vs_LPS	DINCH	12	16h_DINCH_10000nM	*	blue_MINCH_4_h
13102	16h_DINCH_10000nM_ctrlLPS	0.0777208338481816	0.164431254142997	NUP210	blue	UniprotAccessions-blue_MINCH_4_h_strict_GS4_MM4	7	Cluster 1	Q8TEM1	vs_LPS	DINCH	12	16h_DINCH_10000nM		blue_MINCH_4_h
14102	16h_DINCH_10000nM_ctrlLPS	-0.0215571815019113	0.580201476644331	WDR11	blue	UniprotAccessions-blue_MINCH_4_h_strict_GS4_MM4	12	Cluster 2	Q9BZH6	vs_LPS	DINCH	12	16h_DINCH_10000nM		blue_MINCH_4_h
15102	16h_DINCH_10000nM_ctrlLPS	0.050176302297174	0.439593732001516	LRCH1	blue	UniprotAccessions-blue_MINCH_4_h_strict_GS4_MM4	11	Cluster 2	Q9Y2L9	vs_LPS	DINCH	12	16h_DINCH_10000nM		blue_MINCH_4_h
16102	16h_DINCH_10000nM_ctrlLPS	0.082403887014507	0.0122972651232322	UFC1	blue	UniprotAccessions-blue_MINCH_4_h_strict_GS4_MM4	10	Cluster 1	Q9Y3C8	vs_LPS	DINCH	12	16h_DINCH_10000nM	*	blue_MINCH_4_h
17102	16h_DINCH_10000nM_ctrlLPS	-0.0211968477177872	0.465765424831433	RPL36	blue	UniprotAccessions-blue_MINCH_4_h_strict_GS4_MM4	9	Cluster 1	Q9Y3U8	vs_LPS	DINCH	12	16h_DINCH_10000nM		blue_MINCH_4_h
12011	16h_MINCH_10nM_ctrlLPS	0.0225524240876286	0.243575880977481	UBA6	blue	UniprotAccessions-blue_MINCH_4_h_strict_GS4_MM4	1	Cluster 1	A0AVT1	vs_LPS	MINCH	13	16h_MINCH_10nM		blue_MINCH_4_h
12111	16h_MINCH_10nM_ctrlLPS	0.0609335599441206	0.0126048197419141		blue	UniprotAccessions-blue_MINCH_4_h_strict_GS4_MM4	5	Cluster 2	E9PSI1	vs_LPS	MINCH	13	16h_MINCH_10nM	*	blue_MINCH_4_h
12211	16h_MINCH_10nM_ctrlLPS	-0.0118053952627661	0.581870788552219	PPP6C	blue	UniprotAccessions-blue_MINCH_4_h_strict_GS4_MM4	6	Cluster 1	O00743	vs_LPS	MINCH	13	16h_MINCH_10nM		blue_MINCH_4_h
12311	16h_MINCH_10nM_ctrlLPS	0.078381554768234	0.0548884497964264	NDUFS2	blue	UniprotAccessions-blue_MINCH_4_h_strict_GS4_MM4	16	Cluster 2	O75306	vs_LPS	MINCH	13	16h_MINCH_10nM		blue_MINCH_4_h
12411	16h_MINCH_10nM_ctrlLPS	0.0180346876699479	0.541593064061129	UBXN7	blue	UniprotAccessions-blue_MINCH_4_h_strict_GS4_MM4	17	Cluster 1	O94888	vs_LPS	MINCH	13	16h_MINCH_10nM		blue_MINCH_4_h
12511	16h_MINCH_10nM_ctrlLPS	0.090821106544947	0.0190189951378613	IL1B	blue	UniprotAccessions-blue_MINCH_4_h_strict_GS4_MM4	3	Cluster 1	P01584	vs_LPS	MINCH	13	16h_MINCH_10nM	*	blue_MINCH_4_h
12611	16h_MINCH_10nM_ctrlLPS	0.147569942062835	0.0251399741070245	ACAA1	blue	UniprotAccessions-blue_MINCH_4_h_strict_GS4_MM4	13	Cluster 2	P09110	vs_LPS	MINCH	13	16h_MINCH_10nM	*	blue_MINCH_4_h
12711	16h_MINCH_10nM_ctrlLPS	0.201771667825093	0.0654445048336664	PTDSS1	blue	UniprotAccessions-blue_MINCH_4_h_strict_GS4_MM4	2	Cluster 2	P48651	vs_LPS	MINCH	13	16h_MINCH_10nM		blue_MINCH_4_h
12811	16h_MINCH_10nM_ctrlLPS	0.216085509295857	0.0491273160124871	HIST2H2BF	blue	UniprotAccessions-blue_MINCH_4_h_strict_GS4_MM4	4	Cluster 2	Q5QNW6	vs_LPS	MINCH	13	16h_MINCH_10nM	*	blue_MINCH_4_h
12911	16h_MINCH_10nM_ctrlLPS	0.00222184120507225	0.892532338848201	ARMH3	blue	UniprotAccessions-blue_MINCH_4_h_strict_GS4_MM4	15	Cluster 2	Q5T2E6	vs_LPS	MINCH	13	16h_MINCH_10nM		blue_MINCH_4_h
13011	16h_MINCH_10nM_ctrlLPS	0.0567880543597016	0.385171761525567	THEMIS2	blue	UniprotAccessions-blue_MINCH_4_h_strict_GS4_MM4	8	Cluster 2	Q5TEJ8	vs_LPS	MINCH	13	16h_MINCH_10nM		blue_MINCH_4_h
13111	16h_MINCH_10nM_ctrlLPS	0.248119659060753	0.149286256310028	TMEM205	blue	UniprotAccessions-blue_MINCH_4_h_strict_GS4_MM4	14	Cluster 2	Q6UW68	vs_LPS	MINCH	13	16h_MINCH_10nM		blue_MINCH_4_h
13211	16h_MINCH_10nM_ctrlLPS	-0.155609212713793	8.40769414245333e-08	NUP210	blue	UniprotAccessions-blue_MINCH_4_h_strict_GS4_MM4	7	Cluster 1	Q8TEM1	vs_LPS	MINCH	13	16h_MINCH_10nM	***	blue_MINCH_4_h
13311	16h_MINCH_10nM_ctrlLPS	0.0291546739337077	0.71222964271079	WDR11	blue	UniprotAccessions-blue_MINCH_4_h_strict_GS4_MM4	12	Cluster 2	Q9BZH6	vs_LPS	MINCH	13	16h_MINCH_10nM		blue_MINCH_4_h
13411	16h_MINCH_10nM_ctrlLPS	0.0460200540277141	0.015374638845956	LRCH1	blue	UniprotAccessions-blue_MINCH_4_h_strict_GS4_MM4	11	Cluster 2	Q9Y2L9	vs_LPS	MINCH	13	16h_MINCH_10nM	*	blue_MINCH_4_h
13511	16h_MINCH_10nM_ctrlLPS	-0.0315450744018953	0.584134524625584	UFC1	blue	UniprotAccessions-blue_MINCH_4_h_strict_GS4_MM4	10	Cluster 1	Q9Y3C8	vs_LPS	MINCH	13	16h_MINCH_10nM		blue_MINCH_4_h
13611	16h_MINCH_10nM_ctrlLPS	0.0368123703085927	0.402023190061695	RPL36	blue	UniprotAccessions-blue_MINCH_4_h_strict_GS4_MM4	9	Cluster 1	Q9Y3U8	vs_LPS	MINCH	13	16h_MINCH_10nM		blue_MINCH_4_h
10311	16h_MINCH_100nM_ctrlLPS	0.013084386635148	0.414224113090818	UBA6	blue	UniprotAccessions-blue_MINCH_4_h_strict_GS4_MM4	1	Cluster 1	A0AVT1	vs_LPS	MINCH	14	16h_MINCH_100nM		blue_MINCH_4_h
10411	16h_MINCH_100nM_ctrlLPS	0.0653223724305837	0.173003501892523		blue	UniprotAccessions-blue_MINCH_4_h_strict_GS4_MM4	5	Cluster 2	E9PSI1	vs_LPS	MINCH	14	16h_MINCH_100nM		blue_MINCH_4_h
10511	16h_MINCH_100nM_ctrlLPS	-0.0412130168970678	0.225265428794998	PPP6C	blue	UniprotAccessions-blue_MINCH_4_h_strict_GS4_MM4	6	Cluster 1	O00743	vs_LPS	MINCH	14	16h_MINCH_100nM		blue_MINCH_4_h
10611	16h_MINCH_100nM_ctrlLPS	0.0117329174498757	0.776860340197625	NDUFS2	blue	UniprotAccessions-blue_MINCH_4_h_strict_GS4_MM4	16	Cluster 2	O75306	vs_LPS	MINCH	14	16h_MINCH_100nM		blue_MINCH_4_h
10711	16h_MINCH_100nM_ctrlLPS	0.00326512661650184	0.927970369787029	UBXN7	blue	UniprotAccessions-blue_MINCH_4_h_strict_GS4_MM4	17	Cluster 1	O94888	vs_LPS	MINCH	14	16h_MINCH_100nM		blue_MINCH_4_h
10811	16h_MINCH_100nM_ctrlLPS	-0.0666657323801155	0.186519411969614	IL1B	blue	UniprotAccessions-blue_MINCH_4_h_strict_GS4_MM4	3	Cluster 1	P01584	vs_LPS	MINCH	14	16h_MINCH_100nM		blue_MINCH_4_h
10911	16h_MINCH_100nM_ctrlLPS	0.174569308900324	0.0662772062111165	ACAA1	blue	UniprotAccessions-blue_MINCH_4_h_strict_GS4_MM4	13	Cluster 2	P09110	vs_LPS	MINCH	14	16h_MINCH_100nM		blue_MINCH_4_h
11011	16h_MINCH_100nM_ctrlLPS	0.166210751843694	0.00281556877068467	PTDSS1	blue	UniprotAccessions-blue_MINCH_4_h_strict_GS4_MM4	2	Cluster 2	P48651	vs_LPS	MINCH	14	16h_MINCH_100nM	**	blue_MINCH_4_h
11111	16h_MINCH_100nM_ctrlLPS	0.218567794654982	0.0637242491426579	HIST2H2BF	blue	UniprotAccessions-blue_MINCH_4_h_strict_GS4_MM4	4	Cluster 2	Q5QNW6	vs_LPS	MINCH	14	16h_MINCH_100nM		blue_MINCH_4_h
11211	16h_MINCH_100nM_ctrlLPS	0.184722433086079	0.0972376557494406	ARMH3	blue	UniprotAccessions-blue_MINCH_4_h_strict_GS4_MM4	15	Cluster 2	Q5T2E6	vs_LPS	MINCH	14	16h_MINCH_100nM		blue_MINCH_4_h
11311	16h_MINCH_100nM_ctrlLPS	0.0137875697228677	0.686031911486298	THEMIS2	blue	UniprotAccessions-blue_MINCH_4_h_strict_GS4_MM4	8	Cluster 2	Q5TEJ8	vs_LPS	MINCH	14	16h_MINCH_100nM		blue_MINCH_4_h
11411	16h_MINCH_100nM_ctrlLPS	0.126752804877931	0.198172728990983	TMEM205	blue	UniprotAccessions-blue_MINCH_4_h_strict_GS4_MM4	14	Cluster 2	Q6UW68	vs_LPS	MINCH	14	16h_MINCH_100nM		blue_MINCH_4_h
11511	16h_MINCH_100nM_ctrlLPS	0.0140754324258731	0.798829155270505	NUP210	blue	UniprotAccessions-blue_MINCH_4_h_strict_GS4_MM4	7	Cluster 1	Q8TEM1	vs_LPS	MINCH	14	16h_MINCH_100nM		blue_MINCH_4_h
11611	16h_MINCH_100nM_ctrlLPS	0.0655112662147818	0.408346037797817	WDR11	blue	UniprotAccessions-blue_MINCH_4_h_strict_GS4_MM4	12	Cluster 2	Q9BZH6	vs_LPS	MINCH	14	16h_MINCH_100nM		blue_MINCH_4_h
11711	16h_MINCH_100nM_ctrlLPS	-0.0356707336406622	0.55035380642394	LRCH1	blue	UniprotAccessions-blue_MINCH_4_h_strict_GS4_MM4	11	Cluster 2	Q9Y2L9	vs_LPS	MINCH	14	16h_MINCH_100nM		blue_MINCH_4_h
11811	16h_MINCH_100nM_ctrlLPS	-0.0032245110221937	0.95495094691343	UFC1	blue	UniprotAccessions-blue_MINCH_4_h_strict_GS4_MM4	10	Cluster 1	Q9Y3C8	vs_LPS	MINCH	14	16h_MINCH_100nM		blue_MINCH_4_h
11911	16h_MINCH_100nM_ctrlLPS	0.00386738487465226	0.902612463622594	RPL36	blue	UniprotAccessions-blue_MINCH_4_h_strict_GS4_MM4	9	Cluster 1	Q9Y3U8	vs_LPS	MINCH	14	16h_MINCH_100nM		blue_MINCH_4_h
8611	16h_MINCH_1000nM_ctrlLPS	-0.00873173281228085	0.511190737192747	UBA6	blue	UniprotAccessions-blue_MINCH_4_h_strict_GS4_MM4	1	Cluster 1	A0AVT1	vs_LPS	MINCH	15	16h_MINCH_1000nM		blue_MINCH_4_h
8711	16h_MINCH_1000nM_ctrlLPS	0.128345084672235	0.0205051619798829		blue	UniprotAccessions-blue_MINCH_4_h_strict_GS4_MM4	5	Cluster 2	E9PSI1	vs_LPS	MINCH	15	16h_MINCH_1000nM	*	blue_MINCH_4_h
8811	16h_MINCH_1000nM_ctrlLPS	-0.042589647188553	0.433179230902523	PPP6C	blue	UniprotAccessions-blue_MINCH_4_h_strict_GS4_MM4	6	Cluster 1	O00743	vs_LPS	MINCH	15	16h_MINCH_1000nM		blue_MINCH_4_h
8911	16h_MINCH_1000nM_ctrlLPS	-0.00153895327069017	0.973609249434418	NDUFS2	blue	UniprotAccessions-blue_MINCH_4_h_strict_GS4_MM4	16	Cluster 2	O75306	vs_LPS	MINCH	15	16h_MINCH_1000nM		blue_MINCH_4_h
9011	16h_MINCH_1000nM_ctrlLPS	0.0209037506385913	0.741738102452293	UBXN7	blue	UniprotAccessions-blue_MINCH_4_h_strict_GS4_MM4	17	Cluster 1	O94888	vs_LPS	MINCH	15	16h_MINCH_1000nM		blue_MINCH_4_h
9111	16h_MINCH_1000nM_ctrlLPS	0.0451600177194653	0.0333505727686782	IL1B	blue	UniprotAccessions-blue_MINCH_4_h_strict_GS4_MM4	3	Cluster 1	P01584	vs_LPS	MINCH	15	16h_MINCH_1000nM	*	blue_MINCH_4_h
9211	16h_MINCH_1000nM_ctrlLPS	0.246298756236426	0.0268923542693552	ACAA1	blue	UniprotAccessions-blue_MINCH_4_h_strict_GS4_MM4	13	Cluster 2	P09110	vs_LPS	MINCH	15	16h_MINCH_1000nM	*	blue_MINCH_4_h
9311	16h_MINCH_1000nM_ctrlLPS	0.086313135761302	0.13972596934205	PTDSS1	blue	UniprotAccessions-blue_MINCH_4_h_strict_GS4_MM4	2	Cluster 2	P48651	vs_LPS	MINCH	15	16h_MINCH_1000nM		blue_MINCH_4_h
9411	16h_MINCH_1000nM_ctrlLPS	0.198417742903458	0.0423379529247151	HIST2H2BF	blue	UniprotAccessions-blue_MINCH_4_h_strict_GS4_MM4	4	Cluster 2	Q5QNW6	vs_LPS	MINCH	15	16h_MINCH_1000nM	*	blue_MINCH_4_h
9511	16h_MINCH_1000nM_ctrlLPS	0.10103155201694	0.366387018090619	ARMH3	blue	UniprotAccessions-blue_MINCH_4_h_strict_GS4_MM4	15	Cluster 2	Q5T2E6	vs_LPS	MINCH	15	16h_MINCH_1000nM		blue_MINCH_4_h
9611	16h_MINCH_1000nM_ctrlLPS	0.0262830506392185	0.59756763261506	THEMIS2	blue	UniprotAccessions-blue_MINCH_4_h_strict_GS4_MM4	8	Cluster 2	Q5TEJ8	vs_LPS	MINCH	15	16h_MINCH_1000nM		blue_MINCH_4_h
9711	16h_MINCH_1000nM_ctrlLPS	0.296331918838808	0.0503287803998023	TMEM205	blue	UniprotAccessions-blue_MINCH_4_h_strict_GS4_MM4	14	Cluster 2	Q6UW68	vs_LPS	MINCH	15	16h_MINCH_1000nM		blue_MINCH_4_h
9811	16h_MINCH_1000nM_ctrlLPS	0.0403575085178234	0.192953090194558	NUP210	blue	UniprotAccessions-blue_MINCH_4_h_strict_GS4_MM4	7	Cluster 1	Q8TEM1	vs_LPS	MINCH	15	16h_MINCH_1000nM		blue_MINCH_4_h
9911	16h_MINCH_1000nM_ctrlLPS	0.160264195094599	0.0214384815624876	WDR11	blue	UniprotAccessions-blue_MINCH_4_h_strict_GS4_MM4	12	Cluster 2	Q9BZH6	vs_LPS	MINCH	15	16h_MINCH_1000nM	*	blue_MINCH_4_h
10011	16h_MINCH_1000nM_ctrlLPS	-0.0296884647932524	0.82604953351926	LRCH1	blue	UniprotAccessions-blue_MINCH_4_h_strict_GS4_MM4	11	Cluster 2	Q9Y2L9	vs_LPS	MINCH	15	16h_MINCH_1000nM		blue_MINCH_4_h
10111	16h_MINCH_1000nM_ctrlLPS	-0.00968255915029717	0.865200209053402	UFC1	blue	UniprotAccessions-blue_MINCH_4_h_strict_GS4_MM4	10	Cluster 1	Q9Y3C8	vs_LPS	MINCH	15	16h_MINCH_1000nM		blue_MINCH_4_h
10211	16h_MINCH_1000nM_ctrlLPS	-0.0278992460980126	0.533185613078191	RPL36	blue	UniprotAccessions-blue_MINCH_4_h_strict_GS4_MM4	9	Cluster 1	Q9Y3U8	vs_LPS	MINCH	15	16h_MINCH_1000nM		blue_MINCH_4_h
6912	16h_MINCH_10000nM_ctrlLPS	-0.00563163490073985	0.716790140513969	UBA6	blue	UniprotAccessions-blue_MINCH_4_h_strict_GS4_MM4	1	Cluster 1	A0AVT1	vs_LPS	MINCH	16	16h_MINCH_10000nM		blue_MINCH_4_h
7012	16h_MINCH_10000nM_ctrlLPS	0.0810677662496438	0.0465808741981614		blue	UniprotAccessions-blue_MINCH_4_h_strict_GS4_MM4	5	Cluster 2	E9PSI1	vs_LPS	MINCH	16	16h_MINCH_10000nM	*	blue_MINCH_4_h
7112	16h_MINCH_10000nM_ctrlLPS	-0.0269905637922407	0.495461041925234	PPP6C	blue	UniprotAccessions-blue_MINCH_4_h_strict_GS4_MM4	6	Cluster 1	O00743	vs_LPS	MINCH	16	16h_MINCH_10000nM		blue_MINCH_4_h
7212	16h_MINCH_10000nM_ctrlLPS	0.0297872046929209	0.521215602846868	NDUFS2	blue	UniprotAccessions-blue_MINCH_4_h_strict_GS4_MM4	16	Cluster 2	O75306	vs_LPS	MINCH	16	16h_MINCH_10000nM		blue_MINCH_4_h
7311	16h_MINCH_10000nM_ctrlLPS	-0.0135476706178997	0.793153821214176	UBXN7	blue	UniprotAccessions-blue_MINCH_4_h_strict_GS4_MM4	17	Cluster 1	O94888	vs_LPS	MINCH	16	16h_MINCH_10000nM		blue_MINCH_4_h
7411	16h_MINCH_10000nM_ctrlLPS	0.0847836873504004	0.0166801293421636	IL1B	blue	UniprotAccessions-blue_MINCH_4_h_strict_GS4_MM4	3	Cluster 1	P01584	vs_LPS	MINCH	16	16h_MINCH_10000nM	*	blue_MINCH_4_h
7511	16h_MINCH_10000nM_ctrlLPS	0.161952934516634	0.271043770158747	ACAA1	blue	UniprotAccessions-blue_MINCH_4_h_strict_GS4_MM4	13	Cluster 2	P09110	vs_LPS	MINCH	16	16h_MINCH_10000nM		blue_MINCH_4_h
7611	16h_MINCH_10000nM_ctrlLPS	0.0439576728351122	0.721653168475977	PTDSS1	blue	UniprotAccessions-blue_MINCH_4_h_strict_GS4_MM4	2	Cluster 2	P48651	vs_LPS	MINCH	16	16h_MINCH_10000nM		blue_MINCH_4_h
7711	16h_MINCH_10000nM_ctrlLPS	0.164768095963106	0.0110580560947017	HIST2H2BF	blue	UniprotAccessions-blue_MINCH_4_h_strict_GS4_MM4	4	Cluster 2	Q5QNW6	vs_LPS	MINCH	16	16h_MINCH_10000nM	*	blue_MINCH_4_h
7811	16h_MINCH_10000nM_ctrlLPS	0.0640317017162435	0.385280625539777	ARMH3	blue	UniprotAccessions-blue_MINCH_4_h_strict_GS4_MM4	15	Cluster 2	Q5T2E6	vs_LPS	MINCH	16	16h_MINCH_10000nM		blue_MINCH_4_h
7911	16h_MINCH_10000nM_ctrlLPS	-0.00380814542998806	0.964080270021354	THEMIS2	blue	UniprotAccessions-blue_MINCH_4_h_strict_GS4_MM4	8	Cluster 2	Q5TEJ8	vs_LPS	MINCH	16	16h_MINCH_10000nM		blue_MINCH_4_h
8011	16h_MINCH_10000nM_ctrlLPS	0.142642929023352	0.410011537048127	TMEM205	blue	UniprotAccessions-blue_MINCH_4_h_strict_GS4_MM4	14	Cluster 2	Q6UW68	vs_LPS	MINCH	16	16h_MINCH_10000nM		blue_MINCH_4_h
8111	16h_MINCH_10000nM_ctrlLPS	0.103839146892589	0.0956205630993659	NUP210	blue	UniprotAccessions-blue_MINCH_4_h_strict_GS4_MM4	7	Cluster 1	Q8TEM1	vs_LPS	MINCH	16	16h_MINCH_10000nM		blue_MINCH_4_h
8211	16h_MINCH_10000nM_ctrlLPS	0.138767312488167	0.197631801842522	WDR11	blue	UniprotAccessions-blue_MINCH_4_h_strict_GS4_MM4	12	Cluster 2	Q9BZH6	vs_LPS	MINCH	16	16h_MINCH_10000nM		blue_MINCH_4_h
8311	16h_MINCH_10000nM_ctrlLPS	-0.061098477837843	0.464479160579019	LRCH1	blue	UniprotAccessions-blue_MINCH_4_h_strict_GS4_MM4	11	Cluster 2	Q9Y2L9	vs_LPS	MINCH	16	16h_MINCH_10000nM		blue_MINCH_4_h
8411	16h_MINCH_10000nM_ctrlLPS	-0.00736938505264741	0.589519835831649	UFC1	blue	UniprotAccessions-blue_MINCH_4_h_strict_GS4_MM4	10	Cluster 1	Q9Y3C8	vs_LPS	MINCH	16	16h_MINCH_10000nM		blue_MINCH_4_h
8511	16h_MINCH_10000nM_ctrlLPS	-0.00238227673046074	0.967329832081884	RPL36	blue	UniprotAccessions-blue_MINCH_4_h_strict_GS4_MM4	9	Cluster 1	Q9Y3U8	vs_LPS	MINCH	16	16h_MINCH_10000nM		blue_MINCH_4_h
18811	1d_DINCH_10nM_ctrlLPS	0.00146839521831167	0.961341419998997	UBA6	blue	UniprotAccessions-blue_MINCH_4_h_strict_GS4_MM4	1	Cluster 1	A0AVT1	vs_LPS	DINCH	17	1d_DINCH_10nM		blue_MINCH_4_h
18911	1d_DINCH_10nM_ctrlLPS	-0.0250566375916725	0.645339195710996		blue	UniprotAccessions-blue_MINCH_4_h_strict_GS4_MM4	5	Cluster 2	E9PSI1	vs_LPS	DINCH	17	1d_DINCH_10nM		blue_MINCH_4_h
19011	1d_DINCH_10nM_ctrlLPS	-0.00249406096757497	0.936558007621972	PPP6C	blue	UniprotAccessions-blue_MINCH_4_h_strict_GS4_MM4	6	Cluster 1	O00743	vs_LPS	DINCH	17	1d_DINCH_10nM		blue_MINCH_4_h
19111	1d_DINCH_10nM_ctrlLPS	-0.0113013645564854	0.717826369878229	NDUFS2	blue	UniprotAccessions-blue_MINCH_4_h_strict_GS4_MM4	16	Cluster 2	O75306	vs_LPS	DINCH	17	1d_DINCH_10nM		blue_MINCH_4_h
19211	1d_DINCH_10nM_ctrlLPS	-0.0116213463046279	0.767649361095673	UBXN7	blue	UniprotAccessions-blue_MINCH_4_h_strict_GS4_MM4	17	Cluster 1	O94888	vs_LPS	DINCH	17	1d_DINCH_10nM		blue_MINCH_4_h
19311	1d_DINCH_10nM_ctrlLPS	0.0420582367283516	0.322189583014409	IL1B	blue	UniprotAccessions-blue_MINCH_4_h_strict_GS4_MM4	3	Cluster 1	P01584	vs_LPS	DINCH	17	1d_DINCH_10nM		blue_MINCH_4_h
19411	1d_DINCH_10nM_ctrlLPS	0.0509821501785567	0.140473116328993	ACAA1	blue	UniprotAccessions-blue_MINCH_4_h_strict_GS4_MM4	13	Cluster 2	P09110	vs_LPS	DINCH	17	1d_DINCH_10nM		blue_MINCH_4_h
19511	1d_DINCH_10nM_ctrlLPS	0.0522003815115368	0.201192314049638	PTDSS1	blue	UniprotAccessions-blue_MINCH_4_h_strict_GS4_MM4	2	Cluster 2	P48651	vs_LPS	DINCH	17	1d_DINCH_10nM		blue_MINCH_4_h
19611	1d_DINCH_10nM_ctrlLPS	0.494908667155269	0.000821798389256718	HIST2H2BF	blue	UniprotAccessions-blue_MINCH_4_h_strict_GS4_MM4	4	Cluster 2	Q5QNW6	vs_LPS	DINCH	17	1d_DINCH_10nM	***	blue_MINCH_4_h
19711	1d_DINCH_10nM_ctrlLPS	0.138038600438259	0.310487632861425	ARMH3	blue	UniprotAccessions-blue_MINCH_4_h_strict_GS4_MM4	15	Cluster 2	Q5T2E6	vs_LPS	DINCH	17	1d_DINCH_10nM		blue_MINCH_4_h
19811	1d_DINCH_10nM_ctrlLPS	0.0121298164593433	0.836450907170058	THEMIS2	blue	UniprotAccessions-blue_MINCH_4_h_strict_GS4_MM4	8	Cluster 2	Q5TEJ8	vs_LPS	DINCH	17	1d_DINCH_10nM		blue_MINCH_4_h
19911	1d_DINCH_10nM_ctrlLPS	0.0124353315368739	0.878642470061696	TMEM205	blue	UniprotAccessions-blue_MINCH_4_h_strict_GS4_MM4	14	Cluster 2	Q6UW68	vs_LPS	DINCH	17	1d_DINCH_10nM		blue_MINCH_4_h
20011	1d_DINCH_10nM_ctrlLPS	-0.399209130360603	1.9725600945268e-05	NUP210	blue	UniprotAccessions-blue_MINCH_4_h_strict_GS4_MM4	7	Cluster 1	Q8TEM1	vs_LPS	DINCH	17	1d_DINCH_10nM	***	blue_MINCH_4_h
20111	1d_DINCH_10nM_ctrlLPS	-0.114292816930421	0.262549641897196	WDR11	blue	UniprotAccessions-blue_MINCH_4_h_strict_GS4_MM4	12	Cluster 2	Q9BZH6	vs_LPS	DINCH	17	1d_DINCH_10nM		blue_MINCH_4_h
20211	1d_DINCH_10nM_ctrlLPS	-0.0403183088643521	0.410037867198315	LRCH1	blue	UniprotAccessions-blue_MINCH_4_h_strict_GS4_MM4	11	Cluster 2	Q9Y2L9	vs_LPS	DINCH	17	1d_DINCH_10nM		blue_MINCH_4_h
20311	1d_DINCH_10nM_ctrlLPS	-0.104367264654323	0.00244440601310376	UFC1	blue	UniprotAccessions-blue_MINCH_4_h_strict_GS4_MM4	10	Cluster 1	Q9Y3C8	vs_LPS	DINCH	17	1d_DINCH_10nM	**	blue_MINCH_4_h
20411	1d_DINCH_10nM_ctrlLPS	0.0166218758893541	0.523312389744157	RPL36	blue	UniprotAccessions-blue_MINCH_4_h_strict_GS4_MM4	9	Cluster 1	Q9Y3U8	vs_LPS	DINCH	17	1d_DINCH_10nM		blue_MINCH_4_h
17111	1d_DINCH_100nM_ctrlLPS	0.000773894107146445	0.95676235524453	UBA6	blue	UniprotAccessions-blue_MINCH_4_h_strict_GS4_MM4	1	Cluster 1	A0AVT1	vs_LPS	DINCH	18	1d_DINCH_100nM		blue_MINCH_4_h
17211	1d_DINCH_100nM_ctrlLPS	-0.0149258285123315	0.349549761879178		blue	UniprotAccessions-blue_MINCH_4_h_strict_GS4_MM4	5	Cluster 2	E9PSI1	vs_LPS	DINCH	18	1d_DINCH_100nM		blue_MINCH_4_h
17311	1d_DINCH_100nM_ctrlLPS	-0.0399735261436149	0.0475947627263911	PPP6C	blue	UniprotAccessions-blue_MINCH_4_h_strict_GS4_MM4	6	Cluster 1	O00743	vs_LPS	DINCH	18	1d_DINCH_100nM	*	blue_MINCH_4_h
17411	1d_DINCH_100nM_ctrlLPS	-0.0405171743171219	0.0784672827650328	NDUFS2	blue	UniprotAccessions-blue_MINCH_4_h_strict_GS4_MM4	16	Cluster 2	O75306	vs_LPS	DINCH	18	1d_DINCH_100nM		blue_MINCH_4_h
17511	1d_DINCH_100nM_ctrlLPS	-0.012462347462364	0.745693661382611	UBXN7	blue	UniprotAccessions-blue_MINCH_4_h_strict_GS4_MM4	17	Cluster 1	O94888	vs_LPS	DINCH	18	1d_DINCH_100nM		blue_MINCH_4_h
17611	1d_DINCH_100nM_ctrlLPS	0.0917594949783404	0.0451494872853177	IL1B	blue	UniprotAccessions-blue_MINCH_4_h_strict_GS4_MM4	3	Cluster 1	P01584	vs_LPS	DINCH	18	1d_DINCH_100nM	*	blue_MINCH_4_h
17711	1d_DINCH_100nM_ctrlLPS	0.0515325022397158	0.196902873584364	ACAA1	blue	UniprotAccessions-blue_MINCH_4_h_strict_GS4_MM4	13	Cluster 2	P09110	vs_LPS	DINCH	18	1d_DINCH_100nM		blue_MINCH_4_h
17811	1d_DINCH_100nM_ctrlLPS	-0.00189794429749293	0.978296029421194	PTDSS1	blue	UniprotAccessions-blue_MINCH_4_h_strict_GS4_MM4	2	Cluster 2	P48651	vs_LPS	DINCH	18	1d_DINCH_100nM		blue_MINCH_4_h
17911	1d_DINCH_100nM_ctrlLPS	0.180187886207261	0.0582523223353765	HIST2H2BF	blue	UniprotAccessions-blue_MINCH_4_h_strict_GS4_MM4	4	Cluster 2	Q5QNW6	vs_LPS	DINCH	18	1d_DINCH_100nM		blue_MINCH_4_h
18011	1d_DINCH_100nM_ctrlLPS	0.163062059631645	0.259150214613623	ARMH3	blue	UniprotAccessions-blue_MINCH_4_h_strict_GS4_MM4	15	Cluster 2	Q5T2E6	vs_LPS	DINCH	18	1d_DINCH_100nM		blue_MINCH_4_h
18111	1d_DINCH_100nM_ctrlLPS	0.065449120024877	0.206336827854268	THEMIS2	blue	UniprotAccessions-blue_MINCH_4_h_strict_GS4_MM4	8	Cluster 2	Q5TEJ8	vs_LPS	DINCH	18	1d_DINCH_100nM		blue_MINCH_4_h
18211	1d_DINCH_100nM_ctrlLPS	0.0739340365988356	0.419878519446209	TMEM205	blue	UniprotAccessions-blue_MINCH_4_h_strict_GS4_MM4	14	Cluster 2	Q6UW68	vs_LPS	DINCH	18	1d_DINCH_100nM		blue_MINCH_4_h
18311	1d_DINCH_100nM_ctrlLPS	-0.458505199242143	3.05030523431881e-06	NUP210	blue	UniprotAccessions-blue_MINCH_4_h_strict_GS4_MM4	7	Cluster 1	Q8TEM1	vs_LPS	DINCH	18	1d_DINCH_100nM	***	blue_MINCH_4_h
18411	1d_DINCH_100nM_ctrlLPS	-0.0305525440996266	0.67612145907641	WDR11	blue	UniprotAccessions-blue_MINCH_4_h_strict_GS4_MM4	12	Cluster 2	Q9BZH6	vs_LPS	DINCH	18	1d_DINCH_100nM		blue_MINCH_4_h
18511	1d_DINCH_100nM_ctrlLPS	-0.0692305423683373	0.255415456541551	LRCH1	blue	UniprotAccessions-blue_MINCH_4_h_strict_GS4_MM4	11	Cluster 2	Q9Y2L9	vs_LPS	DINCH	18	1d_DINCH_100nM		blue_MINCH_4_h
18611	1d_DINCH_100nM_ctrlLPS	-0.0203353057030884	0.344038612040349	UFC1	blue	UniprotAccessions-blue_MINCH_4_h_strict_GS4_MM4	10	Cluster 1	Q9Y3C8	vs_LPS	DINCH	18	1d_DINCH_100nM		blue_MINCH_4_h
18711	1d_DINCH_100nM_ctrlLPS	-0.0364791588599109	0.0247334940948575	RPL36	blue	UniprotAccessions-blue_MINCH_4_h_strict_GS4_MM4	9	Cluster 1	Q9Y3U8	vs_LPS	DINCH	18	1d_DINCH_100nM	*	blue_MINCH_4_h
15411	1d_DINCH_1000nM_ctrlLPS	0.0286969576946291	0.545319705790878	UBA6	blue	UniprotAccessions-blue_MINCH_4_h_strict_GS4_MM4	1	Cluster 1	A0AVT1	vs_LPS	DINCH	19	1d_DINCH_1000nM		blue_MINCH_4_h
15511	1d_DINCH_1000nM_ctrlLPS	0.0214230333263721	0.606583698241242		blue	UniprotAccessions-blue_MINCH_4_h_strict_GS4_MM4	5	Cluster 2	E9PSI1	vs_LPS	DINCH	19	1d_DINCH_1000nM		blue_MINCH_4_h
15611	1d_DINCH_1000nM_ctrlLPS	0.0146046250918738	0.00928523624801499	PPP6C	blue	UniprotAccessions-blue_MINCH_4_h_strict_GS4_MM4	6	Cluster 1	O00743	vs_LPS	DINCH	19	1d_DINCH_1000nM	**	blue_MINCH_4_h
15711	1d_DINCH_1000nM_ctrlLPS	-0.0580386754734586	0.248767357825121	NDUFS2	blue	UniprotAccessions-blue_MINCH_4_h_strict_GS4_MM4	16	Cluster 2	O75306	vs_LPS	DINCH	19	1d_DINCH_1000nM		blue_MINCH_4_h
15811	1d_DINCH_1000nM_ctrlLPS	0.0226084213276257	0.226652205464579	UBXN7	blue	UniprotAccessions-blue_MINCH_4_h_strict_GS4_MM4	17	Cluster 1	O94888	vs_LPS	DINCH	19	1d_DINCH_1000nM		blue_MINCH_4_h
15911	1d_DINCH_1000nM_ctrlLPS	0.146548679214688	0.0249684260690692	IL1B	blue	UniprotAccessions-blue_MINCH_4_h_strict_GS4_MM4	3	Cluster 1	P01584	vs_LPS	DINCH	19	1d_DINCH_1000nM	*	blue_MINCH_4_h
16011	1d_DINCH_1000nM_ctrlLPS	0.0534596016122209	0.355892695270094	ACAA1	blue	UniprotAccessions-blue_MINCH_4_h_strict_GS4_MM4	13	Cluster 2	P09110	vs_LPS	DINCH	19	1d_DINCH_1000nM		blue_MINCH_4_h
16111	1d_DINCH_1000nM_ctrlLPS	0.0367757231300172	0.576404770557284	PTDSS1	blue	UniprotAccessions-blue_MINCH_4_h_strict_GS4_MM4	2	Cluster 2	P48651	vs_LPS	DINCH	19	1d_DINCH_1000nM		blue_MINCH_4_h
16211	1d_DINCH_1000nM_ctrlLPS	0.0973366175322857	0.149414285680575	HIST2H2BF	blue	UniprotAccessions-blue_MINCH_4_h_strict_GS4_MM4	4	Cluster 2	Q5QNW6	vs_LPS	DINCH	19	1d_DINCH_1000nM		blue_MINCH_4_h
16311	1d_DINCH_1000nM_ctrlLPS	0.240254806283979	0.302528619010665	ARMH3	blue	UniprotAccessions-blue_MINCH_4_h_strict_GS4_MM4	15	Cluster 2	Q5T2E6	vs_LPS	DINCH	19	1d_DINCH_1000nM		blue_MINCH_4_h
16411	1d_DINCH_1000nM_ctrlLPS	0.0690363346565028	0.674143615070546	THEMIS2	blue	UniprotAccessions-blue_MINCH_4_h_strict_GS4_MM4	8	Cluster 2	Q5TEJ8	vs_LPS	DINCH	19	1d_DINCH_1000nM		blue_MINCH_4_h
16511	1d_DINCH_1000nM_ctrlLPS	0.0840773961754878	0.00314345252692578	TMEM205	blue	UniprotAccessions-blue_MINCH_4_h_strict_GS4_MM4	14	Cluster 2	Q6UW68	vs_LPS	DINCH	19	1d_DINCH_1000nM	**	blue_MINCH_4_h
16611	1d_DINCH_1000nM_ctrlLPS	-0.232727088269058	0.00515776278324489	NUP210	blue	UniprotAccessions-blue_MINCH_4_h_strict_GS4_MM4	7	Cluster 1	Q8TEM1	vs_LPS	DINCH	19	1d_DINCH_1000nM	**	blue_MINCH_4_h
16711	1d_DINCH_1000nM_ctrlLPS	-0.0842162022795031	0.216913190577998	WDR11	blue	UniprotAccessions-blue_MINCH_4_h_strict_GS4_MM4	12	Cluster 2	Q9BZH6	vs_LPS	DINCH	19	1d_DINCH_1000nM		blue_MINCH_4_h
16811	1d_DINCH_1000nM_ctrlLPS	-0.0013685604667875	0.987734011401919	LRCH1	blue	UniprotAccessions-blue_MINCH_4_h_strict_GS4_MM4	11	Cluster 2	Q9Y2L9	vs_LPS	DINCH	19	1d_DINCH_1000nM		blue_MINCH_4_h
16911	1d_DINCH_1000nM_ctrlLPS	-0.0263086466944233	0.482194479223998	UFC1	blue	UniprotAccessions-blue_MINCH_4_h_strict_GS4_MM4	10	Cluster 1	Q9Y3C8	vs_LPS	DINCH	19	1d_DINCH_1000nM		blue_MINCH_4_h
17011	1d_DINCH_1000nM_ctrlLPS	-0.0787695613384362	0.00584415880875128	RPL36	blue	UniprotAccessions-blue_MINCH_4_h_strict_GS4_MM4	9	Cluster 1	Q9Y3U8	vs_LPS	DINCH	19	1d_DINCH_1000nM	**	blue_MINCH_4_h
13711	1d_DINCH_10000nM_ctrlLPS	0.0086092286094687	0.243199679527221	UBA6	blue	UniprotAccessions-blue_MINCH_4_h_strict_GS4_MM4	1	Cluster 1	A0AVT1	vs_LPS	DINCH	20	1d_DINCH_10000nM		blue_MINCH_4_h
13811	1d_DINCH_10000nM_ctrlLPS	0.0834451966914326	0.0578872968517009		blue	UniprotAccessions-blue_MINCH_4_h_strict_GS4_MM4	5	Cluster 2	E9PSI1	vs_LPS	DINCH	20	1d_DINCH_10000nM		blue_MINCH_4_h
13911	1d_DINCH_10000nM_ctrlLPS	0.00804629523536765	0.221620727887123	PPP6C	blue	UniprotAccessions-blue_MINCH_4_h_strict_GS4_MM4	6	Cluster 1	O00743	vs_LPS	DINCH	20	1d_DINCH_10000nM		blue_MINCH_4_h
14011	1d_DINCH_10000nM_ctrlLPS	-0.0101267691321811	0.717653987223007	NDUFS2	blue	UniprotAccessions-blue_MINCH_4_h_strict_GS4_MM4	16	Cluster 2	O75306	vs_LPS	DINCH	20	1d_DINCH_10000nM		blue_MINCH_4_h
14111	1d_DINCH_10000nM_ctrlLPS	0.0129085603996209	0.788565496309738	UBXN7	blue	UniprotAccessions-blue_MINCH_4_h_strict_GS4_MM4	17	Cluster 1	O94888	vs_LPS	DINCH	20	1d_DINCH_10000nM		blue_MINCH_4_h
14211	1d_DINCH_10000nM_ctrlLPS	0.0646094543527006	0.131420463842465	IL1B	blue	UniprotAccessions-blue_MINCH_4_h_strict_GS4_MM4	3	Cluster 1	P01584	vs_LPS	DINCH	20	1d_DINCH_10000nM		blue_MINCH_4_h
14311	1d_DINCH_10000nM_ctrlLPS	0.0200314339375804	0.620295294196512	ACAA1	blue	UniprotAccessions-blue_MINCH_4_h_strict_GS4_MM4	13	Cluster 2	P09110	vs_LPS	DINCH	20	1d_DINCH_10000nM		blue_MINCH_4_h
14411	1d_DINCH_10000nM_ctrlLPS	0.137663209992059	0.00929303829650496	PTDSS1	blue	UniprotAccessions-blue_MINCH_4_h_strict_GS4_MM4	2	Cluster 2	P48651	vs_LPS	DINCH	20	1d_DINCH_10000nM	**	blue_MINCH_4_h
14511	1d_DINCH_10000nM_ctrlLPS	0.0801778525827345	0.339274506072714	HIST2H2BF	blue	UniprotAccessions-blue_MINCH_4_h_strict_GS4_MM4	4	Cluster 2	Q5QNW6	vs_LPS	DINCH	20	1d_DINCH_10000nM		blue_MINCH_4_h
14611	1d_DINCH_10000nM_ctrlLPS	0.0867658352977128	0.695211309148204	ARMH3	blue	UniprotAccessions-blue_MINCH_4_h_strict_GS4_MM4	15	Cluster 2	Q5T2E6	vs_LPS	DINCH	20	1d_DINCH_10000nM		blue_MINCH_4_h
14711	1d_DINCH_10000nM_ctrlLPS	0.065652456117631	0.287933830803945	THEMIS2	blue	UniprotAccessions-blue_MINCH_4_h_strict_GS4_MM4	8	Cluster 2	Q5TEJ8	vs_LPS	DINCH	20	1d_DINCH_10000nM		blue_MINCH_4_h
14811	1d_DINCH_10000nM_ctrlLPS	0.0950236638964053	0.267368037434781	TMEM205	blue	UniprotAccessions-blue_MINCH_4_h_strict_GS4_MM4	14	Cluster 2	Q6UW68	vs_LPS	DINCH	20	1d_DINCH_10000nM		blue_MINCH_4_h
14911	1d_DINCH_10000nM_ctrlLPS	0.0355489229466438	0.257920849990576	NUP210	blue	UniprotAccessions-blue_MINCH_4_h_strict_GS4_MM4	7	Cluster 1	Q8TEM1	vs_LPS	DINCH	20	1d_DINCH_10000nM		blue_MINCH_4_h
15011	1d_DINCH_10000nM_ctrlLPS	-0.0655767003442405	0.0379171051835972	WDR11	blue	UniprotAccessions-blue_MINCH_4_h_strict_GS4_MM4	12	Cluster 2	Q9BZH6	vs_LPS	DINCH	20	1d_DINCH_10000nM	*	blue_MINCH_4_h
15111	1d_DINCH_10000nM_ctrlLPS	-0.0616238612117717	0.268696419449446	LRCH1	blue	UniprotAccessions-blue_MINCH_4_h_strict_GS4_MM4	11	Cluster 2	Q9Y2L9	vs_LPS	DINCH	20	1d_DINCH_10000nM		blue_MINCH_4_h
15211	1d_DINCH_10000nM_ctrlLPS	-0.0201113509760665	0.309895555200985	UFC1	blue	UniprotAccessions-blue_MINCH_4_h_strict_GS4_MM4	10	Cluster 1	Q9Y3C8	vs_LPS	DINCH	20	1d_DINCH_10000nM		blue_MINCH_4_h
15311	1d_DINCH_10000nM_ctrlLPS	-0.00920119042816813	0.655892611679955	RPL36	blue	UniprotAccessions-blue_MINCH_4_h_strict_GS4_MM4	9	Cluster 1	Q9Y3U8	vs_LPS	DINCH	20	1d_DINCH_10000nM		blue_MINCH_4_h
25611	1d_MINCH_10nM_ctrlLPS	0.018175675622234	0.559290998542531	UBA6	blue	UniprotAccessions-blue_MINCH_4_h_strict_GS4_MM4	1	Cluster 1	A0AVT1	vs_LPS	MINCH	21	1d_MINCH_10nM		blue_MINCH_4_h
25711	1d_MINCH_10nM_ctrlLPS	0.0716231887300675	0.172119393214951		blue	UniprotAccessions-blue_MINCH_4_h_strict_GS4_MM4	5	Cluster 2	E9PSI1	vs_LPS	MINCH	21	1d_MINCH_10nM		blue_MINCH_4_h
25811	1d_MINCH_10nM_ctrlLPS	0.0485927185246964	0.0050434140573642	PPP6C	blue	UniprotAccessions-blue_MINCH_4_h_strict_GS4_MM4	6	Cluster 1	O00743	vs_LPS	MINCH	21	1d_MINCH_10nM	**	blue_MINCH_4_h
25911	1d_MINCH_10nM_ctrlLPS	-0.0178300685560977	0.666563259889696	NDUFS2	blue	UniprotAccessions-blue_MINCH_4_h_strict_GS4_MM4	16	Cluster 2	O75306	vs_LPS	MINCH	21	1d_MINCH_10nM		blue_MINCH_4_h
26011	1d_MINCH_10nM_ctrlLPS	0.0272058299981758	0.11879747722193	UBXN7	blue	UniprotAccessions-blue_MINCH_4_h_strict_GS4_MM4	17	Cluster 1	O94888	vs_LPS	MINCH	21	1d_MINCH_10nM		blue_MINCH_4_h
26111	1d_MINCH_10nM_ctrlLPS	0.00117037499139451	0.977358888233172	IL1B	blue	UniprotAccessions-blue_MINCH_4_h_strict_GS4_MM4	3	Cluster 1	P01584	vs_LPS	MINCH	21	1d_MINCH_10nM		blue_MINCH_4_h
26211	1d_MINCH_10nM_ctrlLPS	0.0984992302331013	0.227547140283649	ACAA1	blue	UniprotAccessions-blue_MINCH_4_h_strict_GS4_MM4	13	Cluster 2	P09110	vs_LPS	MINCH	21	1d_MINCH_10nM		blue_MINCH_4_h
26311	1d_MINCH_10nM_ctrlLPS	0.0457365020921494	0.49189684218216	PTDSS1	blue	UniprotAccessions-blue_MINCH_4_h_strict_GS4_MM4	2	Cluster 2	P48651	vs_LPS	MINCH	21	1d_MINCH_10nM		blue_MINCH_4_h
26411	1d_MINCH_10nM_ctrlLPS	-0.173529372115866	0.0875928410182516	HIST2H2BF	blue	UniprotAccessions-blue_MINCH_4_h_strict_GS4_MM4	4	Cluster 2	Q5QNW6	vs_LPS	MINCH	21	1d_MINCH_10nM		blue_MINCH_4_h
265	1d_MINCH_10nM_ctrlLPS	0.101761314609984	0.595137951950877	ARMH3	blue	UniprotAccessions-blue_MINCH_4_h_strict_GS4_MM4	15	Cluster 2	Q5T2E6	vs_LPS	MINCH	21	1d_MINCH_10nM		blue_MINCH_4_h
266	1d_MINCH_10nM_ctrlLPS	0.0898023761381021	0.441498575774875	THEMIS2	blue	UniprotAccessions-blue_MINCH_4_h_strict_GS4_MM4	8	Cluster 2	Q5TEJ8	vs_LPS	MINCH	21	1d_MINCH_10nM		blue_MINCH_4_h
267	1d_MINCH_10nM_ctrlLPS	0.10730068259131	0.265439583620068	TMEM205	blue	UniprotAccessions-blue_MINCH_4_h_strict_GS4_MM4	14	Cluster 2	Q6UW68	vs_LPS	MINCH	21	1d_MINCH_10nM		blue_MINCH_4_h
268	1d_MINCH_10nM_ctrlLPS	-0.397992644904523	4.43908197691598e-05	NUP210	blue	UniprotAccessions-blue_MINCH_4_h_strict_GS4_MM4	7	Cluster 1	Q8TEM1	vs_LPS	MINCH	21	1d_MINCH_10nM	***	blue_MINCH_4_h
269	1d_MINCH_10nM_ctrlLPS	-0.0834693885173146	0.545680296275071	WDR11	blue	UniprotAccessions-blue_MINCH_4_h_strict_GS4_MM4	12	Cluster 2	Q9BZH6	vs_LPS	MINCH	21	1d_MINCH_10nM		blue_MINCH_4_h
270	1d_MINCH_10nM_ctrlLPS	0.0452646781336594	0.598949675413156	LRCH1	blue	UniprotAccessions-blue_MINCH_4_h_strict_GS4_MM4	11	Cluster 2	Q9Y2L9	vs_LPS	MINCH	21	1d_MINCH_10nM		blue_MINCH_4_h
271	1d_MINCH_10nM_ctrlLPS	0.0446307372982647	0.479987097020145	UFC1	blue	UniprotAccessions-blue_MINCH_4_h_strict_GS4_MM4	10	Cluster 1	Q9Y3C8	vs_LPS	MINCH	21	1d_MINCH_10nM		blue_MINCH_4_h
272	1d_MINCH_10nM_ctrlLPS	-0.0333492500065612	0.433136293515846	RPL36	blue	UniprotAccessions-blue_MINCH_4_h_strict_GS4_MM4	9	Cluster 1	Q9Y3U8	vs_LPS	MINCH	21	1d_MINCH_10nM		blue_MINCH_4_h
23911	1d_MINCH_100nM_ctrlLPS	-0.00187467948105932	0.953629124076584	UBA6	blue	UniprotAccessions-blue_MINCH_4_h_strict_GS4_MM4	1	Cluster 1	A0AVT1	vs_LPS	MINCH	22	1d_MINCH_100nM		blue_MINCH_4_h
24011	1d_MINCH_100nM_ctrlLPS	0.0520373818762876	0.0172095995153525		blue	UniprotAccessions-blue_MINCH_4_h_strict_GS4_MM4	5	Cluster 2	E9PSI1	vs_LPS	MINCH	22	1d_MINCH_100nM	*	blue_MINCH_4_h
24111	1d_MINCH_100nM_ctrlLPS	-0.00237651267003147	0.872044980194236	PPP6C	blue	UniprotAccessions-blue_MINCH_4_h_strict_GS4_MM4	6	Cluster 1	O00743	vs_LPS	MINCH	22	1d_MINCH_100nM		blue_MINCH_4_h
24211	1d_MINCH_100nM_ctrlLPS	0.00846881879343481	0.595424787035078	NDUFS2	blue	UniprotAccessions-blue_MINCH_4_h_strict_GS4_MM4	16	Cluster 2	O75306	vs_LPS	MINCH	22	1d_MINCH_100nM		blue_MINCH_4_h
24311	1d_MINCH_100nM_ctrlLPS	0.055520946267434	0.00944615143311609	UBXN7	blue	UniprotAccessions-blue_MINCH_4_h_strict_GS4_MM4	17	Cluster 1	O94888	vs_LPS	MINCH	22	1d_MINCH_100nM	**	blue_MINCH_4_h
24411	1d_MINCH_100nM_ctrlLPS	0.0416338749130899	0.384119254758781	IL1B	blue	UniprotAccessions-blue_MINCH_4_h_strict_GS4_MM4	3	Cluster 1	P01584	vs_LPS	MINCH	22	1d_MINCH_100nM		blue_MINCH_4_h
24511	1d_MINCH_100nM_ctrlLPS	0.138189949491318	0.123244556640105	ACAA1	blue	UniprotAccessions-blue_MINCH_4_h_strict_GS4_MM4	13	Cluster 2	P09110	vs_LPS	MINCH	22	1d_MINCH_100nM		blue_MINCH_4_h
24611	1d_MINCH_100nM_ctrlLPS	0.120493319629912	0.0427927594101401	PTDSS1	blue	UniprotAccessions-blue_MINCH_4_h_strict_GS4_MM4	2	Cluster 2	P48651	vs_LPS	MINCH	22	1d_MINCH_100nM	*	blue_MINCH_4_h
24711	1d_MINCH_100nM_ctrlLPS	0.123925176027547	0.000193923325408283	HIST2H2BF	blue	UniprotAccessions-blue_MINCH_4_h_strict_GS4_MM4	4	Cluster 2	Q5QNW6	vs_LPS	MINCH	22	1d_MINCH_100nM	***	blue_MINCH_4_h
24811	1d_MINCH_100nM_ctrlLPS	0.115375846984138	0.559232246356602	ARMH3	blue	UniprotAccessions-blue_MINCH_4_h_strict_GS4_MM4	15	Cluster 2	Q5T2E6	vs_LPS	MINCH	22	1d_MINCH_100nM		blue_MINCH_4_h
24911	1d_MINCH_100nM_ctrlLPS	0.131721517855967	0.090093451577019	THEMIS2	blue	UniprotAccessions-blue_MINCH_4_h_strict_GS4_MM4	8	Cluster 2	Q5TEJ8	vs_LPS	MINCH	22	1d_MINCH_100nM		blue_MINCH_4_h
25011	1d_MINCH_100nM_ctrlLPS	0.0132292610764257	0.861171571075166	TMEM205	blue	UniprotAccessions-blue_MINCH_4_h_strict_GS4_MM4	14	Cluster 2	Q6UW68	vs_LPS	MINCH	22	1d_MINCH_100nM		blue_MINCH_4_h
25111	1d_MINCH_100nM_ctrlLPS	-0.231355624113984	0.00105256914312951	NUP210	blue	UniprotAccessions-blue_MINCH_4_h_strict_GS4_MM4	7	Cluster 1	Q8TEM1	vs_LPS	MINCH	22	1d_MINCH_100nM	**	blue_MINCH_4_h
25211	1d_MINCH_100nM_ctrlLPS	-0.0626661682211798	0.0672659167691748	WDR11	blue	UniprotAccessions-blue_MINCH_4_h_strict_GS4_MM4	12	Cluster 2	Q9BZH6	vs_LPS	MINCH	22	1d_MINCH_100nM		blue_MINCH_4_h
25311	1d_MINCH_100nM_ctrlLPS	-0.0301871432585741	0.240110996532444	LRCH1	blue	UniprotAccessions-blue_MINCH_4_h_strict_GS4_MM4	11	Cluster 2	Q9Y2L9	vs_LPS	MINCH	22	1d_MINCH_100nM		blue_MINCH_4_h
25411	1d_MINCH_100nM_ctrlLPS	-0.0617346081885378	0.0137574330949824	UFC1	blue	UniprotAccessions-blue_MINCH_4_h_strict_GS4_MM4	10	Cluster 1	Q9Y3C8	vs_LPS	MINCH	22	1d_MINCH_100nM	*	blue_MINCH_4_h
25511	1d_MINCH_100nM_ctrlLPS	-0.0938154460914572	0.00135016252494387	RPL36	blue	UniprotAccessions-blue_MINCH_4_h_strict_GS4_MM4	9	Cluster 1	Q9Y3U8	vs_LPS	MINCH	22	1d_MINCH_100nM	**	blue_MINCH_4_h
22211	1d_MINCH_1000nM_ctrlLPS	0.0233849660510406	0.214764403840629	UBA6	blue	UniprotAccessions-blue_MINCH_4_h_strict_GS4_MM4	1	Cluster 1	A0AVT1	vs_LPS	MINCH	23	1d_MINCH_1000nM		blue_MINCH_4_h
22311	1d_MINCH_1000nM_ctrlLPS	0.102408582729213	0.0977080979444242		blue	UniprotAccessions-blue_MINCH_4_h_strict_GS4_MM4	5	Cluster 2	E9PSI1	vs_LPS	MINCH	23	1d_MINCH_1000nM		blue_MINCH_4_h
22411	1d_MINCH_1000nM_ctrlLPS	0.0598335475333105	0.00297925862878904	PPP6C	blue	UniprotAccessions-blue_MINCH_4_h_strict_GS4_MM4	6	Cluster 1	O00743	vs_LPS	MINCH	23	1d_MINCH_1000nM	**	blue_MINCH_4_h
22511	1d_MINCH_1000nM_ctrlLPS	-0.020477963952653	0.298238816166508	NDUFS2	blue	UniprotAccessions-blue_MINCH_4_h_strict_GS4_MM4	16	Cluster 2	O75306	vs_LPS	MINCH	23	1d_MINCH_1000nM		blue_MINCH_4_h
22611	1d_MINCH_1000nM_ctrlLPS	0.0239849304752925	0.414235997695859	UBXN7	blue	UniprotAccessions-blue_MINCH_4_h_strict_GS4_MM4	17	Cluster 1	O94888	vs_LPS	MINCH	23	1d_MINCH_1000nM		blue_MINCH_4_h
22711	1d_MINCH_1000nM_ctrlLPS	0.0518303954943875	0.332436199125136	IL1B	blue	UniprotAccessions-blue_MINCH_4_h_strict_GS4_MM4	3	Cluster 1	P01584	vs_LPS	MINCH	23	1d_MINCH_1000nM		blue_MINCH_4_h
22811	1d_MINCH_1000nM_ctrlLPS	0.0684359277270507	0.2157403650219	ACAA1	blue	UniprotAccessions-blue_MINCH_4_h_strict_GS4_MM4	13	Cluster 2	P09110	vs_LPS	MINCH	23	1d_MINCH_1000nM		blue_MINCH_4_h
22911	1d_MINCH_1000nM_ctrlLPS	0.153339809681016	0.00366010360324666	PTDSS1	blue	UniprotAccessions-blue_MINCH_4_h_strict_GS4_MM4	2	Cluster 2	P48651	vs_LPS	MINCH	23	1d_MINCH_1000nM	**	blue_MINCH_4_h
23011	1d_MINCH_1000nM_ctrlLPS	0.198389178824515	1.18888452885955e-05	HIST2H2BF	blue	UniprotAccessions-blue_MINCH_4_h_strict_GS4_MM4	4	Cluster 2	Q5QNW6	vs_LPS	MINCH	23	1d_MINCH_1000nM	***	blue_MINCH_4_h
23111	1d_MINCH_1000nM_ctrlLPS	0.106035116526579	0.628506138173878	ARMH3	blue	UniprotAccessions-blue_MINCH_4_h_strict_GS4_MM4	15	Cluster 2	Q5T2E6	vs_LPS	MINCH	23	1d_MINCH_1000nM		blue_MINCH_4_h
23211	1d_MINCH_1000nM_ctrlLPS	0.0215490019494471	0.611610347939403	THEMIS2	blue	UniprotAccessions-blue_MINCH_4_h_strict_GS4_MM4	8	Cluster 2	Q5TEJ8	vs_LPS	MINCH	23	1d_MINCH_1000nM		blue_MINCH_4_h
23311	1d_MINCH_1000nM_ctrlLPS	0.055962740647732	0.338384741408248	TMEM205	blue	UniprotAccessions-blue_MINCH_4_h_strict_GS4_MM4	14	Cluster 2	Q6UW68	vs_LPS	MINCH	23	1d_MINCH_1000nM		blue_MINCH_4_h
23411	1d_MINCH_1000nM_ctrlLPS	-0.195594997235615	0.00326239077462714	NUP210	blue	UniprotAccessions-blue_MINCH_4_h_strict_GS4_MM4	7	Cluster 1	Q8TEM1	vs_LPS	MINCH	23	1d_MINCH_1000nM	**	blue_MINCH_4_h
23511	1d_MINCH_1000nM_ctrlLPS	0.0171829139430632	0.500792810140553	WDR11	blue	UniprotAccessions-blue_MINCH_4_h_strict_GS4_MM4	12	Cluster 2	Q9BZH6	vs_LPS	MINCH	23	1d_MINCH_1000nM		blue_MINCH_4_h
23611	1d_MINCH_1000nM_ctrlLPS	-0.0534623267135534	0.0148836905590794	LRCH1	blue	UniprotAccessions-blue_MINCH_4_h_strict_GS4_MM4	11	Cluster 2	Q9Y2L9	vs_LPS	MINCH	23	1d_MINCH_1000nM	*	blue_MINCH_4_h
23711	1d_MINCH_1000nM_ctrlLPS	-0.0261738275189106	0.117341287542843	UFC1	blue	UniprotAccessions-blue_MINCH_4_h_strict_GS4_MM4	10	Cluster 1	Q9Y3C8	vs_LPS	MINCH	23	1d_MINCH_1000nM		blue_MINCH_4_h
23811	1d_MINCH_1000nM_ctrlLPS	-0.048528266419814	0.356930909197868	RPL36	blue	UniprotAccessions-blue_MINCH_4_h_strict_GS4_MM4	9	Cluster 1	Q9Y3U8	vs_LPS	MINCH	23	1d_MINCH_1000nM		blue_MINCH_4_h
20511	1d_MINCH_10000nM_ctrlLPS	-0.00807773401305022	0.764306645856211	UBA6	blue	UniprotAccessions-blue_MINCH_4_h_strict_GS4_MM4	1	Cluster 1	A0AVT1	vs_LPS	MINCH	24	1d_MINCH_10000nM		blue_MINCH_4_h
20611	1d_MINCH_10000nM_ctrlLPS	0.0370750038754671	0.650949782380501		blue	UniprotAccessions-blue_MINCH_4_h_strict_GS4_MM4	5	Cluster 2	E9PSI1	vs_LPS	MINCH	24	1d_MINCH_10000nM		blue_MINCH_4_h
20711	1d_MINCH_10000nM_ctrlLPS	0.0206794094319696	0.390999646342692	PPP6C	blue	UniprotAccessions-blue_MINCH_4_h_strict_GS4_MM4	6	Cluster 1	O00743	vs_LPS	MINCH	24	1d_MINCH_10000nM		blue_MINCH_4_h
20811	1d_MINCH_10000nM_ctrlLPS	-0.0195671590307651	0.748419865073289	NDUFS2	blue	UniprotAccessions-blue_MINCH_4_h_strict_GS4_MM4	16	Cluster 2	O75306	vs_LPS	MINCH	24	1d_MINCH_10000nM		blue_MINCH_4_h
20911	1d_MINCH_10000nM_ctrlLPS	0.0411583426383972	0.377252216901916	UBXN7	blue	UniprotAccessions-blue_MINCH_4_h_strict_GS4_MM4	17	Cluster 1	O94888	vs_LPS	MINCH	24	1d_MINCH_10000nM		blue_MINCH_4_h
21011	1d_MINCH_10000nM_ctrlLPS	-0.00480387559628494	0.896040645648717	IL1B	blue	UniprotAccessions-blue_MINCH_4_h_strict_GS4_MM4	3	Cluster 1	P01584	vs_LPS	MINCH	24	1d_MINCH_10000nM		blue_MINCH_4_h
21111	1d_MINCH_10000nM_ctrlLPS	0.206806208402864	0.000895847187427915	ACAA1	blue	UniprotAccessions-blue_MINCH_4_h_strict_GS4_MM4	13	Cluster 2	P09110	vs_LPS	MINCH	24	1d_MINCH_10000nM	***	blue_MINCH_4_h
21211	1d_MINCH_10000nM_ctrlLPS	-0.0315410372222763	0.543403996179915	PTDSS1	blue	UniprotAccessions-blue_MINCH_4_h_strict_GS4_MM4	2	Cluster 2	P48651	vs_LPS	MINCH	24	1d_MINCH_10000nM		blue_MINCH_4_h
21311	1d_MINCH_10000nM_ctrlLPS	0.12829658004437	0.0201037728587504	HIST2H2BF	blue	UniprotAccessions-blue_MINCH_4_h_strict_GS4_MM4	4	Cluster 2	Q5QNW6	vs_LPS	MINCH	24	1d_MINCH_10000nM	*	blue_MINCH_4_h
21411	1d_MINCH_10000nM_ctrlLPS	0.148149829566861	0.532106151037643	ARMH3	blue	UniprotAccessions-blue_MINCH_4_h_strict_GS4_MM4	15	Cluster 2	Q5T2E6	vs_LPS	MINCH	24	1d_MINCH_10000nM		blue_MINCH_4_h
21511	1d_MINCH_10000nM_ctrlLPS	0.156846286327424	0.199527191804581	THEMIS2	blue	UniprotAccessions-blue_MINCH_4_h_strict_GS4_MM4	8	Cluster 2	Q5TEJ8	vs_LPS	MINCH	24	1d_MINCH_10000nM		blue_MINCH_4_h
21611	1d_MINCH_10000nM_ctrlLPS	0.129617976480795	0.0696991016656969	TMEM205	blue	UniprotAccessions-blue_MINCH_4_h_strict_GS4_MM4	14	Cluster 2	Q6UW68	vs_LPS	MINCH	24	1d_MINCH_10000nM		blue_MINCH_4_h
21711	1d_MINCH_10000nM_ctrlLPS	-0.0431523476071266	0.271841313981515	NUP210	blue	UniprotAccessions-blue_MINCH_4_h_strict_GS4_MM4	7	Cluster 1	Q8TEM1	vs_LPS	MINCH	24	1d_MINCH_10000nM		blue_MINCH_4_h
21811	1d_MINCH_10000nM_ctrlLPS	-0.0113858255536693	0.922593376053264	WDR11	blue	UniprotAccessions-blue_MINCH_4_h_strict_GS4_MM4	12	Cluster 2	Q9BZH6	vs_LPS	MINCH	24	1d_MINCH_10000nM		blue_MINCH_4_h
21911	1d_MINCH_10000nM_ctrlLPS	0.00422332615288539	0.963989012678474	LRCH1	blue	UniprotAccessions-blue_MINCH_4_h_strict_GS4_MM4	11	Cluster 2	Q9Y2L9	vs_LPS	MINCH	24	1d_MINCH_10000nM		blue_MINCH_4_h
22011	1d_MINCH_10000nM_ctrlLPS	-0.0527794922211187	0.148300988733416	UFC1	blue	UniprotAccessions-blue_MINCH_4_h_strict_GS4_MM4	10	Cluster 1	Q9Y3C8	vs_LPS	MINCH	24	1d_MINCH_10000nM		blue_MINCH_4_h
22111	1d_MINCH_10000nM_ctrlLPS	-0.067107243659686	0.154994716027511	RPL36	blue	UniprotAccessions-blue_MINCH_4_h_strict_GS4_MM4	9	Cluster 1	Q9Y3U8	vs_LPS	MINCH	24	1d_MINCH_10000nM		blue_MINCH_4_h
5813	4h_DINCH_10nM_ctrlLPS	0.023689024294664	0.441440854758304	CCT3	blue	UniprotAccessions-blue_MINCH_strict_GS4_MM4	1	Cluster 1	P49368	vs_LPS	DINCH	1	4h_DINCH_10nM		blue_MINCH
5913	4h_DINCH_10nM_ctrlLPS	0.0125809641239824	0.754788730223531	AP2B1	blue	UniprotAccessions-blue_MINCH_strict_GS4_MM4	2	Cluster 1	P63010	vs_LPS	DINCH	1	4h_DINCH_10nM		blue_MINCH
6013	4h_DINCH_10nM_ctrlLPS	0.0207457795356189	0.753482742702804	EIF3M	blue	UniprotAccessions-blue_MINCH_strict_GS4_MM4	3	Cluster 2	Q7L2H7	vs_LPS	DINCH	1	4h_DINCH_10nM		blue_MINCH
5513	4h_DINCH_100nM_ctrlLPS	0.0090717597692569	0.764689402903363	CCT3	blue	UniprotAccessions-blue_MINCH_strict_GS4_MM4	1	Cluster 1	P49368	vs_LPS	DINCH	2	4h_DINCH_100nM		blue_MINCH
5613	4h_DINCH_100nM_ctrlLPS	0.00323228934171641	0.94282095290084	AP2B1	blue	UniprotAccessions-blue_MINCH_strict_GS4_MM4	2	Cluster 1	P63010	vs_LPS	DINCH	2	4h_DINCH_100nM		blue_MINCH
5713	4h_DINCH_100nM_ctrlLPS	0.023784224186715	0.754568643656021	EIF3M	blue	UniprotAccessions-blue_MINCH_strict_GS4_MM4	3	Cluster 2	Q7L2H7	vs_LPS	DINCH	2	4h_DINCH_100nM		blue_MINCH
5213	4h_DINCH_1000nM_ctrlLPS	0.0355924739451949	0.08611212467853	CCT3	blue	UniprotAccessions-blue_MINCH_strict_GS4_MM4	1	Cluster 1	P49368	vs_LPS	DINCH	3	4h_DINCH_1000nM		blue_MINCH
5313	4h_DINCH_1000nM_ctrlLPS	0.00361883568941428	0.914433961264117	AP2B1	blue	UniprotAccessions-blue_MINCH_strict_GS4_MM4	2	Cluster 1	P63010	vs_LPS	DINCH	3	4h_DINCH_1000nM		blue_MINCH
5413	4h_DINCH_1000nM_ctrlLPS	0.0391868533857592	0.534994488618474	EIF3M	blue	UniprotAccessions-blue_MINCH_strict_GS4_MM4	3	Cluster 2	Q7L2H7	vs_LPS	DINCH	3	4h_DINCH_1000nM		blue_MINCH
4913	4h_DINCH_10000nM_ctrlLPS	0.0329443006634204	0.266719801882076	CCT3	blue	UniprotAccessions-blue_MINCH_strict_GS4_MM4	1	Cluster 1	P49368	vs_LPS	DINCH	4	4h_DINCH_10000nM		blue_MINCH
5013	4h_DINCH_10000nM_ctrlLPS	-0.0284823330312637	0.528089035523329	AP2B1	blue	UniprotAccessions-blue_MINCH_strict_GS4_MM4	2	Cluster 1	P63010	vs_LPS	DINCH	4	4h_DINCH_10000nM		blue_MINCH
5113	4h_DINCH_10000nM_ctrlLPS	-0.0306291439578851	0.757545410922223	EIF3M	blue	UniprotAccessions-blue_MINCH_strict_GS4_MM4	3	Cluster 2	Q7L2H7	vs_LPS	DINCH	4	4h_DINCH_10000nM		blue_MINCH
7013	4h_MINCH_10nM_ctrlLPS	-0.00294222810946602	0.902162668065448	CCT3	blue	UniprotAccessions-blue_MINCH_strict_GS4_MM4	1	Cluster 1	P49368	vs_LPS	MINCH	5	4h_MINCH_10nM		blue_MINCH
7113	4h_MINCH_10nM_ctrlLPS	-0.0261092783912629	0.463814655310115	AP2B1	blue	UniprotAccessions-blue_MINCH_strict_GS4_MM4	2	Cluster 1	P63010	vs_LPS	MINCH	5	4h_MINCH_10nM		blue_MINCH
7213	4h_MINCH_10nM_ctrlLPS	0.00207276238094774	0.931589304080466	EIF3M	blue	UniprotAccessions-blue_MINCH_strict_GS4_MM4	3	Cluster 2	Q7L2H7	vs_LPS	MINCH	5	4h_MINCH_10nM		blue_MINCH
6713	4h_MINCH_100nM_ctrlLPS	-0.0361197814959724	0.0664837514803339	CCT3	blue	UniprotAccessions-blue_MINCH_strict_GS4_MM4	1	Cluster 1	P49368	vs_LPS	MINCH	6	4h_MINCH_100nM		blue_MINCH
6813	4h_MINCH_100nM_ctrlLPS	-0.0594936050559611	0.243592248592956	AP2B1	blue	UniprotAccessions-blue_MINCH_strict_GS4_MM4	2	Cluster 1	P63010	vs_LPS	MINCH	6	4h_MINCH_100nM		blue_MINCH
6913	4h_MINCH_100nM_ctrlLPS	-0.0565639670122922	0.447019311268886	EIF3M	blue	UniprotAccessions-blue_MINCH_strict_GS4_MM4	3	Cluster 2	Q7L2H7	vs_LPS	MINCH	6	4h_MINCH_100nM		blue_MINCH
6413	4h_MINCH_1000nM_ctrlLPS	0.0166148482828169	0.699585471921686	CCT3	blue	UniprotAccessions-blue_MINCH_strict_GS4_MM4	1	Cluster 1	P49368	vs_LPS	MINCH	7	4h_MINCH_1000nM		blue_MINCH
6513	4h_MINCH_1000nM_ctrlLPS	-0.0522987088065196	0.203418514506125	AP2B1	blue	UniprotAccessions-blue_MINCH_strict_GS4_MM4	2	Cluster 1	P63010	vs_LPS	MINCH	7	4h_MINCH_1000nM		blue_MINCH
6613	4h_MINCH_1000nM_ctrlLPS	0.0139060795370321	0.817113519196118	EIF3M	blue	UniprotAccessions-blue_MINCH_strict_GS4_MM4	3	Cluster 2	Q7L2H7	vs_LPS	MINCH	7	4h_MINCH_1000nM		blue_MINCH
6113	4h_MINCH_10000nM_ctrlLPS	-0.0130075228112331	0.689814484154369	CCT3	blue	UniprotAccessions-blue_MINCH_strict_GS4_MM4	1	Cluster 1	P49368	vs_LPS	MINCH	8	4h_MINCH_10000nM		blue_MINCH
6213	4h_MINCH_10000nM_ctrlLPS	-0.036171445122694	0.198760756612989	AP2B1	blue	UniprotAccessions-blue_MINCH_strict_GS4_MM4	2	Cluster 1	P63010	vs_LPS	MINCH	8	4h_MINCH_10000nM		blue_MINCH
6313	4h_MINCH_10000nM_ctrlLPS	-0.0329432617229781	0.774030219182473	EIF3M	blue	UniprotAccessions-blue_MINCH_strict_GS4_MM4	3	Cluster 2	Q7L2H7	vs_LPS	MINCH	8	4h_MINCH_10000nM		blue_MINCH
10103	16h_DINCH_10nM_ctrlLPS	0.0422771237699145	0.00347644277241186	CCT3	blue	UniprotAccessions-blue_MINCH_strict_GS4_MM4	1	Cluster 1	P49368	vs_LPS	DINCH	9	16h_DINCH_10nM	**	blue_MINCH
11103	16h_DINCH_10nM_ctrlLPS	0.00155815485313453	0.921895498242065	AP2B1	blue	UniprotAccessions-blue_MINCH_strict_GS4_MM4	2	Cluster 1	P63010	vs_LPS	DINCH	9	16h_DINCH_10nM		blue_MINCH
12103	16h_DINCH_10nM_ctrlLPS	0.017253893810292	0.217173419778216	EIF3M	blue	UniprotAccessions-blue_MINCH_strict_GS4_MM4	3	Cluster 2	Q7L2H7	vs_LPS	DINCH	9	16h_DINCH_10nM		blue_MINCH
7103	16h_DINCH_100nM_ctrlLPS	-0.0166008718105121	0.296331662906876	CCT3	blue	UniprotAccessions-blue_MINCH_strict_GS4_MM4	1	Cluster 1	P49368	vs_LPS	DINCH	10	16h_DINCH_100nM		blue_MINCH
8103	16h_DINCH_100nM_ctrlLPS	-0.00937771302103325	0.690114177045856	AP2B1	blue	UniprotAccessions-blue_MINCH_strict_GS4_MM4	2	Cluster 1	P63010	vs_LPS	DINCH	10	16h_DINCH_100nM		blue_MINCH
9103	16h_DINCH_100nM_ctrlLPS	-0.0286502451488439	0.378046225672363	EIF3M	blue	UniprotAccessions-blue_MINCH_strict_GS4_MM4	3	Cluster 2	Q7L2H7	vs_LPS	DINCH	10	16h_DINCH_100nM		blue_MINCH
4103	16h_DINCH_1000nM_ctrlLPS	0.0265691733971423	0.0165834486445912	CCT3	blue	UniprotAccessions-blue_MINCH_strict_GS4_MM4	1	Cluster 1	P49368	vs_LPS	DINCH	11	16h_DINCH_1000nM	*	blue_MINCH
5103	16h_DINCH_1000nM_ctrlLPS	0.00465758028495314	0.780996008262174	AP2B1	blue	UniprotAccessions-blue_MINCH_strict_GS4_MM4	2	Cluster 1	P63010	vs_LPS	DINCH	11	16h_DINCH_1000nM		blue_MINCH
6103	16h_DINCH_1000nM_ctrlLPS	0.034619324458185	0.176529960653313	EIF3M	blue	UniprotAccessions-blue_MINCH_strict_GS4_MM4	3	Cluster 2	Q7L2H7	vs_LPS	DINCH	11	16h_DINCH_1000nM		blue_MINCH
11003	16h_DINCH_10000nM_ctrlLPS	0.0187492986697023	0.379491191948837	CCT3	blue	UniprotAccessions-blue_MINCH_strict_GS4_MM4	1	Cluster 1	P49368	vs_LPS	DINCH	12	16h_DINCH_10000nM		blue_MINCH
2767	16h_DINCH_10000nM_ctrlLPS	-0.0273235638541721	0.339603197739021	AP2B1	blue	UniprotAccessions-blue_MINCH_strict_GS4_MM4	2	Cluster 1	P63010	vs_LPS	DINCH	12	16h_DINCH_10000nM		blue_MINCH
3103	16h_DINCH_10000nM_ctrlLPS	0.0346383503808803	0.13554407525623	EIF3M	blue	UniprotAccessions-blue_MINCH_strict_GS4_MM4	3	Cluster 2	Q7L2H7	vs_LPS	DINCH	12	16h_DINCH_10000nM		blue_MINCH
22103	16h_MINCH_10nM_ctrlLPS	-0.0241093995006526	0.203903925159041	CCT3	blue	UniprotAccessions-blue_MINCH_strict_GS4_MM4	1	Cluster 1	P49368	vs_LPS	MINCH	13	16h_MINCH_10nM		blue_MINCH
23103	16h_MINCH_10nM_ctrlLPS	-0.058740677504481	0.00576965838600727	AP2B1	blue	UniprotAccessions-blue_MINCH_strict_GS4_MM4	2	Cluster 1	P63010	vs_LPS	MINCH	13	16h_MINCH_10nM	**	blue_MINCH
24103	16h_MINCH_10nM_ctrlLPS	-0.0741337639690676	0.0656033374185772	EIF3M	blue	UniprotAccessions-blue_MINCH_strict_GS4_MM4	3	Cluster 2	Q7L2H7	vs_LPS	MINCH	13	16h_MINCH_10nM		blue_MINCH
19103	16h_MINCH_100nM_ctrlLPS	-0.0354208336226921	0.0800642367490298	CCT3	blue	UniprotAccessions-blue_MINCH_strict_GS4_MM4	1	Cluster 1	P49368	vs_LPS	MINCH	14	16h_MINCH_100nM		blue_MINCH
20103	16h_MINCH_100nM_ctrlLPS	-0.0634279374874632	0.0490138119080728	AP2B1	blue	UniprotAccessions-blue_MINCH_strict_GS4_MM4	2	Cluster 1	P63010	vs_LPS	MINCH	14	16h_MINCH_100nM	*	blue_MINCH
21103	16h_MINCH_100nM_ctrlLPS	-0.0719982370450527	0.0842943200090048	EIF3M	blue	UniprotAccessions-blue_MINCH_strict_GS4_MM4	3	Cluster 2	Q7L2H7	vs_LPS	MINCH	14	16h_MINCH_100nM		blue_MINCH
16103	16h_MINCH_1000nM_ctrlLPS	-0.0543855767395683	0.00188842468259967	CCT3	blue	UniprotAccessions-blue_MINCH_strict_GS4_MM4	1	Cluster 1	P49368	vs_LPS	MINCH	15	16h_MINCH_1000nM	**	blue_MINCH
17103	16h_MINCH_1000nM_ctrlLPS	-0.0767834304393341	0.000794659870997626	AP2B1	blue	UniprotAccessions-blue_MINCH_strict_GS4_MM4	2	Cluster 1	P63010	vs_LPS	MINCH	15	16h_MINCH_1000nM	***	blue_MINCH
18103	16h_MINCH_1000nM_ctrlLPS	-0.0813371021053695	0.0365451667849185	EIF3M	blue	UniprotAccessions-blue_MINCH_strict_GS4_MM4	3	Cluster 2	Q7L2H7	vs_LPS	MINCH	15	16h_MINCH_1000nM	*	blue_MINCH
13103	16h_MINCH_10000nM_ctrlLPS	-0.0327298151847816	0.104886572327603	CCT3	blue	UniprotAccessions-blue_MINCH_strict_GS4_MM4	1	Cluster 1	P49368	vs_LPS	MINCH	16	16h_MINCH_10000nM		blue_MINCH
14103	16h_MINCH_10000nM_ctrlLPS	-0.0741254208973522	0.0123726265736339	AP2B1	blue	UniprotAccessions-blue_MINCH_strict_GS4_MM4	2	Cluster 1	P63010	vs_LPS	MINCH	16	16h_MINCH_10000nM	*	blue_MINCH
15103	16h_MINCH_10000nM_ctrlLPS	-0.130707838619337	0.00809134103473785	EIF3M	blue	UniprotAccessions-blue_MINCH_strict_GS4_MM4	3	Cluster 2	Q7L2H7	vs_LPS	MINCH	16	16h_MINCH_10000nM	**	blue_MINCH
3413	1d_DINCH_10nM_ctrlLPS	-0.00408515046316057	0.799834946854074	CCT3	blue	UniprotAccessions-blue_MINCH_strict_GS4_MM4	1	Cluster 1	P49368	vs_LPS	DINCH	17	1d_DINCH_10nM		blue_MINCH
3513	1d_DINCH_10nM_ctrlLPS	-0.00706757348043878	0.625709463203487	AP2B1	blue	UniprotAccessions-blue_MINCH_strict_GS4_MM4	2	Cluster 1	P63010	vs_LPS	DINCH	17	1d_DINCH_10nM		blue_MINCH
3613	1d_DINCH_10nM_ctrlLPS	0.0608045377548247	0.0164144153010718	EIF3M	blue	UniprotAccessions-blue_MINCH_strict_GS4_MM4	3	Cluster 2	Q7L2H7	vs_LPS	DINCH	17	1d_DINCH_10nM	*	blue_MINCH
3113	1d_DINCH_100nM_ctrlLPS	0.00749738382540156	0.386447761383886	CCT3	blue	UniprotAccessions-blue_MINCH_strict_GS4_MM4	1	Cluster 1	P49368	vs_LPS	DINCH	18	1d_DINCH_100nM		blue_MINCH
3213	1d_DINCH_100nM_ctrlLPS	0.00213212045060223	0.863930671468349	AP2B1	blue	UniprotAccessions-blue_MINCH_strict_GS4_MM4	2	Cluster 1	P63010	vs_LPS	DINCH	18	1d_DINCH_100nM		blue_MINCH
3313	1d_DINCH_100nM_ctrlLPS	0.0323695771633431	0.086763821616071	EIF3M	blue	UniprotAccessions-blue_MINCH_strict_GS4_MM4	3	Cluster 2	Q7L2H7	vs_LPS	DINCH	18	1d_DINCH_100nM		blue_MINCH
2813	1d_DINCH_1000nM_ctrlLPS	-0.013157362099565	0.233600447283985	CCT3	blue	UniprotAccessions-blue_MINCH_strict_GS4_MM4	1	Cluster 1	P49368	vs_LPS	DINCH	19	1d_DINCH_1000nM		blue_MINCH
2913	1d_DINCH_1000nM_ctrlLPS	0.027121599837238	0.391085548702013	AP2B1	blue	UniprotAccessions-blue_MINCH_strict_GS4_MM4	2	Cluster 1	P63010	vs_LPS	DINCH	19	1d_DINCH_1000nM		blue_MINCH
3013	1d_DINCH_1000nM_ctrlLPS	0.0675922358485422	0.00156915651340251	EIF3M	blue	UniprotAccessions-blue_MINCH_strict_GS4_MM4	3	Cluster 2	Q7L2H7	vs_LPS	DINCH	19	1d_DINCH_1000nM	**	blue_MINCH
25103	1d_DINCH_10000nM_ctrlLPS	-0.0263310337542573	0.0202397647505537	CCT3	blue	UniprotAccessions-blue_MINCH_strict_GS4_MM4	1	Cluster 1	P49368	vs_LPS	DINCH	20	1d_DINCH_10000nM	*	blue_MINCH
26103	1d_DINCH_10000nM_ctrlLPS	-0.021986722596665	0.179938572620328	AP2B1	blue	UniprotAccessions-blue_MINCH_strict_GS4_MM4	2	Cluster 1	P63010	vs_LPS	DINCH	20	1d_DINCH_10000nM		blue_MINCH
2768	1d_DINCH_10000nM_ctrlLPS	-0.00359053487850703	0.713635553070497	EIF3M	blue	UniprotAccessions-blue_MINCH_strict_GS4_MM4	3	Cluster 2	Q7L2H7	vs_LPS	DINCH	20	1d_DINCH_10000nM		blue_MINCH
4613	1d_MINCH_10nM_ctrlLPS	-0.00224721497032655	0.848175673528697	CCT3	blue	UniprotAccessions-blue_MINCH_strict_GS4_MM4	1	Cluster 1	P49368	vs_LPS	MINCH	21	1d_MINCH_10nM		blue_MINCH
4713	1d_MINCH_10nM_ctrlLPS	-0.0366031781874138	0.0819340421589608	AP2B1	blue	UniprotAccessions-blue_MINCH_strict_GS4_MM4	2	Cluster 1	P63010	vs_LPS	MINCH	21	1d_MINCH_10nM		blue_MINCH
4813	1d_MINCH_10nM_ctrlLPS	-0.0644367555086322	0.0291653914570587	EIF3M	blue	UniprotAccessions-blue_MINCH_strict_GS4_MM4	3	Cluster 2	Q7L2H7	vs_LPS	MINCH	21	1d_MINCH_10nM	*	blue_MINCH
4313	1d_MINCH_100nM_ctrlLPS	-0.0283690093011897	0.000606473028663728	CCT3	blue	UniprotAccessions-blue_MINCH_strict_GS4_MM4	1	Cluster 1	P49368	vs_LPS	MINCH	22	1d_MINCH_100nM	***	blue_MINCH
4413	1d_MINCH_100nM_ctrlLPS	-0.0290644196116416	0.0374450475869955	AP2B1	blue	UniprotAccessions-blue_MINCH_strict_GS4_MM4	2	Cluster 1	P63010	vs_LPS	MINCH	22	1d_MINCH_100nM	*	blue_MINCH
4513	1d_MINCH_100nM_ctrlLPS	-0.0146987506642723	0.403897537297736	EIF3M	blue	UniprotAccessions-blue_MINCH_strict_GS4_MM4	3	Cluster 2	Q7L2H7	vs_LPS	MINCH	22	1d_MINCH_100nM		blue_MINCH
4013	1d_MINCH_1000nM_ctrlLPS	-0.0619004015175329	0.00121315276433741	CCT3	blue	UniprotAccessions-blue_MINCH_strict_GS4_MM4	1	Cluster 1	P49368	vs_LPS	MINCH	23	1d_MINCH_1000nM	**	blue_MINCH
4113	1d_MINCH_1000nM_ctrlLPS	-0.0339621249979746	0.0229077399303378	AP2B1	blue	UniprotAccessions-blue_MINCH_strict_GS4_MM4	2	Cluster 1	P63010	vs_LPS	MINCH	23	1d_MINCH_1000nM	*	blue_MINCH
4213	1d_MINCH_1000nM_ctrlLPS	-0.107480517690232	0.00153528644272211	EIF3M	blue	UniprotAccessions-blue_MINCH_strict_GS4_MM4	3	Cluster 2	Q7L2H7	vs_LPS	MINCH	23	1d_MINCH_1000nM	**	blue_MINCH
3713	1d_MINCH_10000nM_ctrlLPS	-0.0624044366134363	0.0280667060045937	CCT3	blue	UniprotAccessions-blue_MINCH_strict_GS4_MM4	1	Cluster 1	P49368	vs_LPS	MINCH	24	1d_MINCH_10000nM	*	blue_MINCH
3813	1d_MINCH_10000nM_ctrlLPS	-0.0559150559355424	0.039945098508968	AP2B1	blue	UniprotAccessions-blue_MINCH_strict_GS4_MM4	2	Cluster 1	P63010	vs_LPS	MINCH	24	1d_MINCH_10000nM	*	blue_MINCH
3913	1d_MINCH_10000nM_ctrlLPS	-0.0811707637087433	0.0350393856447184	EIF3M	blue	UniprotAccessions-blue_MINCH_strict_GS4_MM4	3	Cluster 2	Q7L2H7	vs_LPS	MINCH	24	1d_MINCH_10000nM	*	blue_MINCH
5814	4h_DINCH_10nM_ctrlLPS	0.173095555520446	0.215275482251038	RP2	brown	UniprotAccessions-brown_DINCH_1_d_strict_GS4_MM4	1	Cluster 1	O75695	vs_LPS	DINCH	1	4h_DINCH_10nM		brown_DINCH_1_d
5914	4h_DINCH_10nM_ctrlLPS	0.475343112898796	0.029710131579636	MAVS	brown	UniprotAccessions-brown_DINCH_1_d_strict_GS4_MM4	3	Cluster 2	Q7Z434	vs_LPS	DINCH	1	4h_DINCH_10nM	*	brown_DINCH_1_d
6014	4h_DINCH_10nM_ctrlLPS	0.194542316715826	0.283132486727958	PBRM1	brown	UniprotAccessions-brown_DINCH_1_d_strict_GS4_MM4	2	Cluster 1	Q86U86	vs_LPS	DINCH	1	4h_DINCH_10nM		brown_DINCH_1_d
5514	4h_DINCH_100nM_ctrlLPS	0.258353845498107	0.192554944330791	RP2	brown	UniprotAccessions-brown_DINCH_1_d_strict_GS4_MM4	1	Cluster 1	O75695	vs_LPS	DINCH	2	4h_DINCH_100nM		brown_DINCH_1_d
5614	4h_DINCH_100nM_ctrlLPS	0.426193914339453	0.0417128218633599	MAVS	brown	UniprotAccessions-brown_DINCH_1_d_strict_GS4_MM4	3	Cluster 2	Q7Z434	vs_LPS	DINCH	2	4h_DINCH_100nM	*	brown_DINCH_1_d
5714	4h_DINCH_100nM_ctrlLPS	0.245626445514794	0.103785247854653	PBRM1	brown	UniprotAccessions-brown_DINCH_1_d_strict_GS4_MM4	2	Cluster 1	Q86U86	vs_LPS	DINCH	2	4h_DINCH_100nM		brown_DINCH_1_d
5214	4h_DINCH_1000nM_ctrlLPS	0.271921003317372	0.0505090260740091	RP2	brown	UniprotAccessions-brown_DINCH_1_d_strict_GS4_MM4	1	Cluster 1	O75695	vs_LPS	DINCH	3	4h_DINCH_1000nM		brown_DINCH_1_d
5314	4h_DINCH_1000nM_ctrlLPS	0.495995198014185	0.0602546957927365	MAVS	brown	UniprotAccessions-brown_DINCH_1_d_strict_GS4_MM4	3	Cluster 2	Q7Z434	vs_LPS	DINCH	3	4h_DINCH_1000nM		brown_DINCH_1_d
5414	4h_DINCH_1000nM_ctrlLPS	0.251522477211885	0.209189465951834	PBRM1	brown	UniprotAccessions-brown_DINCH_1_d_strict_GS4_MM4	2	Cluster 1	Q86U86	vs_LPS	DINCH	3	4h_DINCH_1000nM		brown_DINCH_1_d
4914	4h_DINCH_10000nM_ctrlLPS	0.295550657042807	0.102812176072993	RP2	brown	UniprotAccessions-brown_DINCH_1_d_strict_GS4_MM4	1	Cluster 1	O75695	vs_LPS	DINCH	4	4h_DINCH_10000nM		brown_DINCH_1_d
5014	4h_DINCH_10000nM_ctrlLPS	0.554170718732222	0.0522048442358075	MAVS	brown	UniprotAccessions-brown_DINCH_1_d_strict_GS4_MM4	3	Cluster 2	Q7Z434	vs_LPS	DINCH	4	4h_DINCH_10000nM		brown_DINCH_1_d
5114	4h_DINCH_10000nM_ctrlLPS	0.29739185074562	0.128917041693398	PBRM1	brown	UniprotAccessions-brown_DINCH_1_d_strict_GS4_MM4	2	Cluster 1	Q86U86	vs_LPS	DINCH	4	4h_DINCH_10000nM		brown_DINCH_1_d
7014	4h_MINCH_10nM_ctrlLPS	0.249852121110415	0.0976989618719999	RP2	brown	UniprotAccessions-brown_DINCH_1_d_strict_GS4_MM4	1	Cluster 1	O75695	vs_LPS	MINCH	5	4h_MINCH_10nM		brown_DINCH_1_d
7114	4h_MINCH_10nM_ctrlLPS	0.39333355852081	0.111419871864141	MAVS	brown	UniprotAccessions-brown_DINCH_1_d_strict_GS4_MM4	3	Cluster 2	Q7Z434	vs_LPS	MINCH	5	4h_MINCH_10nM		brown_DINCH_1_d
7214	4h_MINCH_10nM_ctrlLPS	0.124141190442458	0.377669106307758	PBRM1	brown	UniprotAccessions-brown_DINCH_1_d_strict_GS4_MM4	2	Cluster 1	Q86U86	vs_LPS	MINCH	5	4h_MINCH_10nM		brown_DINCH_1_d
6714	4h_MINCH_100nM_ctrlLPS	0.32779319756634	0.0585723237834919	RP2	brown	UniprotAccessions-brown_DINCH_1_d_strict_GS4_MM4	1	Cluster 1	O75695	vs_LPS	MINCH	6	4h_MINCH_100nM		brown_DINCH_1_d
6814	4h_MINCH_100nM_ctrlLPS	0.569780337890796	0.0710314924540703	MAVS	brown	UniprotAccessions-brown_DINCH_1_d_strict_GS4_MM4	3	Cluster 2	Q7Z434	vs_LPS	MINCH	6	4h_MINCH_100nM		brown_DINCH_1_d
6914	4h_MINCH_100nM_ctrlLPS	0.187652458017089	0.173817919541051	PBRM1	brown	UniprotAccessions-brown_DINCH_1_d_strict_GS4_MM4	2	Cluster 1	Q86U86	vs_LPS	MINCH	6	4h_MINCH_100nM		brown_DINCH_1_d
6414	4h_MINCH_1000nM_ctrlLPS	0.239622675578136	0.226715831516663	RP2	brown	UniprotAccessions-brown_DINCH_1_d_strict_GS4_MM4	1	Cluster 1	O75695	vs_LPS	MINCH	7	4h_MINCH_1000nM		brown_DINCH_1_d
6514	4h_MINCH_1000nM_ctrlLPS	0.526567693378568	0.156489243077131	MAVS	brown	UniprotAccessions-brown_DINCH_1_d_strict_GS4_MM4	3	Cluster 2	Q7Z434	vs_LPS	MINCH	7	4h_MINCH_1000nM		brown_DINCH_1_d
6614	4h_MINCH_1000nM_ctrlLPS	0.29489012007268	0.133581273368616	PBRM1	brown	UniprotAccessions-brown_DINCH_1_d_strict_GS4_MM4	2	Cluster 1	Q86U86	vs_LPS	MINCH	7	4h_MINCH_1000nM		brown_DINCH_1_d
6114	4h_MINCH_10000nM_ctrlLPS	0.393575314471546	0.0490097820974913	RP2	brown	UniprotAccessions-brown_DINCH_1_d_strict_GS4_MM4	1	Cluster 1	O75695	vs_LPS	MINCH	8	4h_MINCH_10000nM	*	brown_DINCH_1_d
6214	4h_MINCH_10000nM_ctrlLPS	0.534627532515425	0.088042655252599	MAVS	brown	UniprotAccessions-brown_DINCH_1_d_strict_GS4_MM4	3	Cluster 2	Q7Z434	vs_LPS	MINCH	8	4h_MINCH_10000nM		brown_DINCH_1_d
6314	4h_MINCH_10000nM_ctrlLPS	0.345034730670235	0.0580393508522781	PBRM1	brown	UniprotAccessions-brown_DINCH_1_d_strict_GS4_MM4	2	Cluster 1	Q86U86	vs_LPS	MINCH	8	4h_MINCH_10000nM		brown_DINCH_1_d
10104	16h_DINCH_10nM_ctrlLPS	0.0105416618889267	0.898972026196494	RP2	brown	UniprotAccessions-brown_DINCH_1_d_strict_GS4_MM4	1	Cluster 1	O75695	vs_LPS	DINCH	9	16h_DINCH_10nM		brown_DINCH_1_d
11104	16h_DINCH_10nM_ctrlLPS	NA	NA	MAVS	brown	UniprotAccessions-brown_DINCH_1_d_strict_GS4_MM4	3	Cluster 2	Q7Z434	vs_LPS	DINCH	9	16h_DINCH_10nM		brown_DINCH_1_d
12104	16h_DINCH_10nM_ctrlLPS	0.0246537549924449	0.716034208321174	PBRM1	brown	UniprotAccessions-brown_DINCH_1_d_strict_GS4_MM4	2	Cluster 1	Q86U86	vs_LPS	DINCH	9	16h_DINCH_10nM		brown_DINCH_1_d
7104	16h_DINCH_100nM_ctrlLPS	0.0263166191442679	0.732817955995802	RP2	brown	UniprotAccessions-brown_DINCH_1_d_strict_GS4_MM4	1	Cluster 1	O75695	vs_LPS	DINCH	10	16h_DINCH_100nM		brown_DINCH_1_d
8104	16h_DINCH_100nM_ctrlLPS	NA	NA	MAVS	brown	UniprotAccessions-brown_DINCH_1_d_strict_GS4_MM4	3	Cluster 2	Q7Z434	vs_LPS	DINCH	10	16h_DINCH_100nM		brown_DINCH_1_d
9104	16h_DINCH_100nM_ctrlLPS	0.114265839164199	0.324303876939551	PBRM1	brown	UniprotAccessions-brown_DINCH_1_d_strict_GS4_MM4	2	Cluster 1	Q86U86	vs_LPS	DINCH	10	16h_DINCH_100nM		brown_DINCH_1_d
4104	16h_DINCH_1000nM_ctrlLPS	-0.0356991738398268	0.548856656274528	RP2	brown	UniprotAccessions-brown_DINCH_1_d_strict_GS4_MM4	1	Cluster 1	O75695	vs_LPS	DINCH	11	16h_DINCH_1000nM		brown_DINCH_1_d
5104	16h_DINCH_1000nM_ctrlLPS	NA	NA	MAVS	brown	UniprotAccessions-brown_DINCH_1_d_strict_GS4_MM4	3	Cluster 2	Q7Z434	vs_LPS	DINCH	11	16h_DINCH_1000nM		brown_DINCH_1_d
6104	16h_DINCH_1000nM_ctrlLPS	-0.0531373163177488	0.59613644137998	PBRM1	brown	UniprotAccessions-brown_DINCH_1_d_strict_GS4_MM4	2	Cluster 1	Q86U86	vs_LPS	DINCH	11	16h_DINCH_1000nM		brown_DINCH_1_d
11004	16h_DINCH_10000nM_ctrlLPS	0.113871503472521	0.101403920475068	RP2	brown	UniprotAccessions-brown_DINCH_1_d_strict_GS4_MM4	1	Cluster 1	O75695	vs_LPS	DINCH	12	16h_DINCH_10000nM		brown_DINCH_1_d
2769	16h_DINCH_10000nM_ctrlLPS	NA	NA	MAVS	brown	UniprotAccessions-brown_DINCH_1_d_strict_GS4_MM4	3	Cluster 2	Q7Z434	vs_LPS	DINCH	12	16h_DINCH_10000nM		brown_DINCH_1_d
3104	16h_DINCH_10000nM_ctrlLPS	0.0499078154085017	0.323298988559095	PBRM1	brown	UniprotAccessions-brown_DINCH_1_d_strict_GS4_MM4	2	Cluster 1	Q86U86	vs_LPS	DINCH	12	16h_DINCH_10000nM		brown_DINCH_1_d
22104	16h_MINCH_10nM_ctrlLPS	0.107349364190336	0.203263614398132	RP2	brown	UniprotAccessions-brown_DINCH_1_d_strict_GS4_MM4	1	Cluster 1	O75695	vs_LPS	MINCH	13	16h_MINCH_10nM		brown_DINCH_1_d
23104	16h_MINCH_10nM_ctrlLPS	NA	NA	MAVS	brown	UniprotAccessions-brown_DINCH_1_d_strict_GS4_MM4	3	Cluster 2	Q7Z434	vs_LPS	MINCH	13	16h_MINCH_10nM		brown_DINCH_1_d
24104	16h_MINCH_10nM_ctrlLPS	0.0150666054768357	0.88797999493348	PBRM1	brown	UniprotAccessions-brown_DINCH_1_d_strict_GS4_MM4	2	Cluster 1	Q86U86	vs_LPS	MINCH	13	16h_MINCH_10nM		brown_DINCH_1_d
19104	16h_MINCH_100nM_ctrlLPS	0.106143881864036	0.465376086174473	RP2	brown	UniprotAccessions-brown_DINCH_1_d_strict_GS4_MM4	1	Cluster 1	O75695	vs_LPS	MINCH	14	16h_MINCH_100nM		brown_DINCH_1_d
20104	16h_MINCH_100nM_ctrlLPS	NA	NA	MAVS	brown	UniprotAccessions-brown_DINCH_1_d_strict_GS4_MM4	3	Cluster 2	Q7Z434	vs_LPS	MINCH	14	16h_MINCH_100nM		brown_DINCH_1_d
21104	16h_MINCH_100nM_ctrlLPS	0.241696740308718	0.00733283511417957	PBRM1	brown	UniprotAccessions-brown_DINCH_1_d_strict_GS4_MM4	2	Cluster 1	Q86U86	vs_LPS	MINCH	14	16h_MINCH_100nM	**	brown_DINCH_1_d
16104	16h_MINCH_1000nM_ctrlLPS	0.189937055338033	0.0469869435538448	RP2	brown	UniprotAccessions-brown_DINCH_1_d_strict_GS4_MM4	1	Cluster 1	O75695	vs_LPS	MINCH	15	16h_MINCH_1000nM	*	brown_DINCH_1_d
17104	16h_MINCH_1000nM_ctrlLPS	NA	NA	MAVS	brown	UniprotAccessions-brown_DINCH_1_d_strict_GS4_MM4	3	Cluster 2	Q7Z434	vs_LPS	MINCH	15	16h_MINCH_1000nM		brown_DINCH_1_d
18104	16h_MINCH_1000nM_ctrlLPS	0.0848863049345324	0.381588750132007	PBRM1	brown	UniprotAccessions-brown_DINCH_1_d_strict_GS4_MM4	2	Cluster 1	Q86U86	vs_LPS	MINCH	15	16h_MINCH_1000nM		brown_DINCH_1_d
13104	16h_MINCH_10000nM_ctrlLPS	0.149231088753244	0.189171277458618	RP2	brown	UniprotAccessions-brown_DINCH_1_d_strict_GS4_MM4	1	Cluster 1	O75695	vs_LPS	MINCH	16	16h_MINCH_10000nM		brown_DINCH_1_d
14104	16h_MINCH_10000nM_ctrlLPS	NA	NA	MAVS	brown	UniprotAccessions-brown_DINCH_1_d_strict_GS4_MM4	3	Cluster 2	Q7Z434	vs_LPS	MINCH	16	16h_MINCH_10000nM		brown_DINCH_1_d
15104	16h_MINCH_10000nM_ctrlLPS	0.0921169490367731	0.162597550171037	PBRM1	brown	UniprotAccessions-brown_DINCH_1_d_strict_GS4_MM4	2	Cluster 1	Q86U86	vs_LPS	MINCH	16	16h_MINCH_10000nM		brown_DINCH_1_d
3414	1d_DINCH_10nM_ctrlLPS	-0.131008919179108	0.0903417656440828	RP2	brown	UniprotAccessions-brown_DINCH_1_d_strict_GS4_MM4	1	Cluster 1	O75695	vs_LPS	DINCH	17	1d_DINCH_10nM		brown_DINCH_1_d
3514	1d_DINCH_10nM_ctrlLPS	-0.119424564262447	0.40389026307827	MAVS	brown	UniprotAccessions-brown_DINCH_1_d_strict_GS4_MM4	3	Cluster 2	Q7Z434	vs_LPS	DINCH	17	1d_DINCH_10nM		brown_DINCH_1_d
3614	1d_DINCH_10nM_ctrlLPS	-0.273631989127796	0.0184813829169746	PBRM1	brown	UniprotAccessions-brown_DINCH_1_d_strict_GS4_MM4	2	Cluster 1	Q86U86	vs_LPS	DINCH	17	1d_DINCH_10nM	*	brown_DINCH_1_d
3114	1d_DINCH_100nM_ctrlLPS	-0.0935167407589891	0.130366325299209	RP2	brown	UniprotAccessions-brown_DINCH_1_d_strict_GS4_MM4	1	Cluster 1	O75695	vs_LPS	DINCH	18	1d_DINCH_100nM		brown_DINCH_1_d
3214	1d_DINCH_100nM_ctrlLPS	-0.0554027049684155	0.292287745838699	MAVS	brown	UniprotAccessions-brown_DINCH_1_d_strict_GS4_MM4	3	Cluster 2	Q7Z434	vs_LPS	DINCH	18	1d_DINCH_100nM		brown_DINCH_1_d
3314	1d_DINCH_100nM_ctrlLPS	-0.236541183653723	2.35610068174945e-06	PBRM1	brown	UniprotAccessions-brown_DINCH_1_d_strict_GS4_MM4	2	Cluster 1	Q86U86	vs_LPS	DINCH	18	1d_DINCH_100nM	***	brown_DINCH_1_d
2814	1d_DINCH_1000nM_ctrlLPS	-0.158713167789542	0.00496669764589389	RP2	brown	UniprotAccessions-brown_DINCH_1_d_strict_GS4_MM4	1	Cluster 1	O75695	vs_LPS	DINCH	19	1d_DINCH_1000nM	**	brown_DINCH_1_d
2914	1d_DINCH_1000nM_ctrlLPS	-0.135674368036979	0.206901217355332	MAVS	brown	UniprotAccessions-brown_DINCH_1_d_strict_GS4_MM4	3	Cluster 2	Q7Z434	vs_LPS	DINCH	19	1d_DINCH_1000nM		brown_DINCH_1_d
3014	1d_DINCH_1000nM_ctrlLPS	-0.0776627201306122	0.311551473917324	PBRM1	brown	UniprotAccessions-brown_DINCH_1_d_strict_GS4_MM4	2	Cluster 1	Q86U86	vs_LPS	DINCH	19	1d_DINCH_1000nM		brown_DINCH_1_d
25104	1d_DINCH_10000nM_ctrlLPS	-0.0897121838995087	0.0702535120431661	RP2	brown	UniprotAccessions-brown_DINCH_1_d_strict_GS4_MM4	1	Cluster 1	O75695	vs_LPS	DINCH	20	1d_DINCH_10000nM		brown_DINCH_1_d
26104	1d_DINCH_10000nM_ctrlLPS	-0.0799733785699972	0.00884250025800115	MAVS	brown	UniprotAccessions-brown_DINCH_1_d_strict_GS4_MM4	3	Cluster 2	Q7Z434	vs_LPS	DINCH	20	1d_DINCH_10000nM	**	brown_DINCH_1_d
2770	1d_DINCH_10000nM_ctrlLPS	-0.0972279496505184	0.170880101943666	PBRM1	brown	UniprotAccessions-brown_DINCH_1_d_strict_GS4_MM4	2	Cluster 1	Q86U86	vs_LPS	DINCH	20	1d_DINCH_10000nM		brown_DINCH_1_d
4614	1d_MINCH_10nM_ctrlLPS	-0.0145946426978129	0.844774927652114	RP2	brown	UniprotAccessions-brown_DINCH_1_d_strict_GS4_MM4	1	Cluster 1	O75695	vs_LPS	MINCH	21	1d_MINCH_10nM		brown_DINCH_1_d
4714	1d_MINCH_10nM_ctrlLPS	-0.191145925039384	0.080090701748026	MAVS	brown	UniprotAccessions-brown_DINCH_1_d_strict_GS4_MM4	3	Cluster 2	Q7Z434	vs_LPS	MINCH	21	1d_MINCH_10nM		brown_DINCH_1_d
4814	1d_MINCH_10nM_ctrlLPS	-0.0419083084035598	0.726520757779955	PBRM1	brown	UniprotAccessions-brown_DINCH_1_d_strict_GS4_MM4	2	Cluster 1	Q86U86	vs_LPS	MINCH	21	1d_MINCH_10nM		brown_DINCH_1_d
4314	1d_MINCH_100nM_ctrlLPS	-0.0149206723590888	0.688696771580092	RP2	brown	UniprotAccessions-brown_DINCH_1_d_strict_GS4_MM4	1	Cluster 1	O75695	vs_LPS	MINCH	22	1d_MINCH_100nM		brown_DINCH_1_d
4414	1d_MINCH_100nM_ctrlLPS	-0.0213239373382905	0.763273076454782	MAVS	brown	UniprotAccessions-brown_DINCH_1_d_strict_GS4_MM4	3	Cluster 2	Q7Z434	vs_LPS	MINCH	22	1d_MINCH_100nM		brown_DINCH_1_d
4514	1d_MINCH_100nM_ctrlLPS	-0.0449769769721818	0.724186492112212	PBRM1	brown	UniprotAccessions-brown_DINCH_1_d_strict_GS4_MM4	2	Cluster 1	Q86U86	vs_LPS	MINCH	22	1d_MINCH_100nM		brown_DINCH_1_d
4014	1d_MINCH_1000nM_ctrlLPS	0.0218288063710276	0.734367631040703	RP2	brown	UniprotAccessions-brown_DINCH_1_d_strict_GS4_MM4	1	Cluster 1	O75695	vs_LPS	MINCH	23	1d_MINCH_1000nM		brown_DINCH_1_d
4114	1d_MINCH_1000nM_ctrlLPS	0.0293366165233705	0.314642842728784	MAVS	brown	UniprotAccessions-brown_DINCH_1_d_strict_GS4_MM4	3	Cluster 2	Q7Z434	vs_LPS	MINCH	23	1d_MINCH_1000nM		brown_DINCH_1_d
4214	1d_MINCH_1000nM_ctrlLPS	-0.117991433107518	0.0653584703141702	PBRM1	brown	UniprotAccessions-brown_DINCH_1_d_strict_GS4_MM4	2	Cluster 1	Q86U86	vs_LPS	MINCH	23	1d_MINCH_1000nM		brown_DINCH_1_d
3714	1d_MINCH_10000nM_ctrlLPS	-0.0687681319072405	0.338151533754703	RP2	brown	UniprotAccessions-brown_DINCH_1_d_strict_GS4_MM4	1	Cluster 1	O75695	vs_LPS	MINCH	24	1d_MINCH_10000nM		brown_DINCH_1_d
3814	1d_MINCH_10000nM_ctrlLPS	0.133936103886592	0.17207772765151	MAVS	brown	UniprotAccessions-brown_DINCH_1_d_strict_GS4_MM4	3	Cluster 2	Q7Z434	vs_LPS	MINCH	24	1d_MINCH_10000nM		brown_DINCH_1_d
3914	1d_MINCH_10000nM_ctrlLPS	0.0166028637759315	0.84325900419363	PBRM1	brown	UniprotAccessions-brown_DINCH_1_d_strict_GS4_MM4	2	Cluster 1	Q86U86	vs_LPS	MINCH	24	1d_MINCH_10000nM		brown_DINCH_1_d
5815	4h_DINCH_10nM_ctrlLPS	0.541278601012501	0.0405680568789047	RFT1	brown	UniprotAccessions-brown_DINCH_16_h_strict_GS4_MM4	1	Cluster 1	B5MDE0	vs_LPS	DINCH	1	4h_DINCH_10nM	*	brown_DINCH_16_h
5915	4h_DINCH_10nM_ctrlLPS	0.993381576692046	0.000810798724644705	CKMT1A	brown	UniprotAccessions-brown_DINCH_16_h_strict_GS4_MM4	2	Cluster 1	P12532	vs_LPS	DINCH	1	4h_DINCH_10nM	***	brown_DINCH_16_h
6015	4h_DINCH_10nM_ctrlLPS	0.0777850817031502	0.184229464116606	PCK2	brown	UniprotAccessions-brown_DINCH_16_h_strict_GS4_MM4	3	Cluster 2	Q16822	vs_LPS	DINCH	1	4h_DINCH_10nM		brown_DINCH_16_h
5515	4h_DINCH_100nM_ctrlLPS	0.561991338205144	0.0134015644067476	RFT1	brown	UniprotAccessions-brown_DINCH_16_h_strict_GS4_MM4	1	Cluster 1	B5MDE0	vs_LPS	DINCH	2	4h_DINCH_100nM	*	brown_DINCH_16_h
5615	4h_DINCH_100nM_ctrlLPS	0.916889239430105	0.000403252742396455	CKMT1A	brown	UniprotAccessions-brown_DINCH_16_h_strict_GS4_MM4	2	Cluster 1	P12532	vs_LPS	DINCH	2	4h_DINCH_100nM	***	brown_DINCH_16_h
5715	4h_DINCH_100nM_ctrlLPS	0.113058539723724	0.00818680905445523	PCK2	brown	UniprotAccessions-brown_DINCH_16_h_strict_GS4_MM4	3	Cluster 2	Q16822	vs_LPS	DINCH	2	4h_DINCH_100nM	**	brown_DINCH_16_h
5215	4h_DINCH_1000nM_ctrlLPS	0.627221544091138	0.029930886660757	RFT1	brown	UniprotAccessions-brown_DINCH_16_h_strict_GS4_MM4	1	Cluster 1	B5MDE0	vs_LPS	DINCH	3	4h_DINCH_1000nM	*	brown_DINCH_16_h
5315	4h_DINCH_1000nM_ctrlLPS	0.812261476413566	0.00253765389997783	CKMT1A	brown	UniprotAccessions-brown_DINCH_16_h_strict_GS4_MM4	2	Cluster 1	P12532	vs_LPS	DINCH	3	4h_DINCH_1000nM	**	brown_DINCH_16_h
5415	4h_DINCH_1000nM_ctrlLPS	0.0728391085060684	0.104164998348	PCK2	brown	UniprotAccessions-brown_DINCH_16_h_strict_GS4_MM4	3	Cluster 2	Q16822	vs_LPS	DINCH	3	4h_DINCH_1000nM		brown_DINCH_16_h
4915	4h_DINCH_10000nM_ctrlLPS	0.526189990442157	0.0575194348405982	RFT1	brown	UniprotAccessions-brown_DINCH_16_h_strict_GS4_MM4	1	Cluster 1	B5MDE0	vs_LPS	DINCH	4	4h_DINCH_10000nM		brown_DINCH_16_h
5015	4h_DINCH_10000nM_ctrlLPS	0.765073637297824	0.0204326719467447	CKMT1A	brown	UniprotAccessions-brown_DINCH_16_h_strict_GS4_MM4	2	Cluster 1	P12532	vs_LPS	DINCH	4	4h_DINCH_10000nM	*	brown_DINCH_16_h
5115	4h_DINCH_10000nM_ctrlLPS	0.131903950757016	0.00364456597642063	PCK2	brown	UniprotAccessions-brown_DINCH_16_h_strict_GS4_MM4	3	Cluster 2	Q16822	vs_LPS	DINCH	4	4h_DINCH_10000nM	**	brown_DINCH_16_h
7015	4h_MINCH_10nM_ctrlLPS	0.477953116663847	0.0588574298786103	RFT1	brown	UniprotAccessions-brown_DINCH_16_h_strict_GS4_MM4	1	Cluster 1	B5MDE0	vs_LPS	MINCH	5	4h_MINCH_10nM		brown_DINCH_16_h
7115	4h_MINCH_10nM_ctrlLPS	0.850243069658024	0.00357205696246305	CKMT1A	brown	UniprotAccessions-brown_DINCH_16_h_strict_GS4_MM4	2	Cluster 1	P12532	vs_LPS	MINCH	5	4h_MINCH_10nM	**	brown_DINCH_16_h
7215	4h_MINCH_10nM_ctrlLPS	0.0989878347901962	0.0573720487936202	PCK2	brown	UniprotAccessions-brown_DINCH_16_h_strict_GS4_MM4	3	Cluster 2	Q16822	vs_LPS	MINCH	5	4h_MINCH_10nM		brown_DINCH_16_h
6715	4h_MINCH_100nM_ctrlLPS	0.403608545822564	0.0612316089768076	RFT1	brown	UniprotAccessions-brown_DINCH_16_h_strict_GS4_MM4	1	Cluster 1	B5MDE0	vs_LPS	MINCH	6	4h_MINCH_100nM		brown_DINCH_16_h
6815	4h_MINCH_100nM_ctrlLPS	0.831521079196261	0.0115745540617969	CKMT1A	brown	UniprotAccessions-brown_DINCH_16_h_strict_GS4_MM4	2	Cluster 1	P12532	vs_LPS	MINCH	6	4h_MINCH_100nM	*	brown_DINCH_16_h
6915	4h_MINCH_100nM_ctrlLPS	0.154596553775081	0.00493217569502213	PCK2	brown	UniprotAccessions-brown_DINCH_16_h_strict_GS4_MM4	3	Cluster 2	Q16822	vs_LPS	MINCH	6	4h_MINCH_100nM	**	brown_DINCH_16_h
6415	4h_MINCH_1000nM_ctrlLPS	0.742251851236703	0.0208417242068259	RFT1	brown	UniprotAccessions-brown_DINCH_16_h_strict_GS4_MM4	1	Cluster 1	B5MDE0	vs_LPS	MINCH	7	4h_MINCH_1000nM	*	brown_DINCH_16_h
6515	4h_MINCH_1000nM_ctrlLPS	0.874559219075901	0.00646067638963839	CKMT1A	brown	UniprotAccessions-brown_DINCH_16_h_strict_GS4_MM4	2	Cluster 1	P12532	vs_LPS	MINCH	7	4h_MINCH_1000nM	**	brown_DINCH_16_h
6615	4h_MINCH_1000nM_ctrlLPS	0.157483839521067	0.0127907379068115	PCK2	brown	UniprotAccessions-brown_DINCH_16_h_strict_GS4_MM4	3	Cluster 2	Q16822	vs_LPS	MINCH	7	4h_MINCH_1000nM	*	brown_DINCH_16_h
6115	4h_MINCH_10000nM_ctrlLPS	0.710711005423329	0.00565957216334657	RFT1	brown	UniprotAccessions-brown_DINCH_16_h_strict_GS4_MM4	1	Cluster 1	B5MDE0	vs_LPS	MINCH	8	4h_MINCH_10000nM	**	brown_DINCH_16_h
6215	4h_MINCH_10000nM_ctrlLPS	0.758880977500504	0.0311016205307898	CKMT1A	brown	UniprotAccessions-brown_DINCH_16_h_strict_GS4_MM4	2	Cluster 1	P12532	vs_LPS	MINCH	8	4h_MINCH_10000nM	*	brown_DINCH_16_h
6315	4h_MINCH_10000nM_ctrlLPS	0.0980468026687194	0.125752948515894	PCK2	brown	UniprotAccessions-brown_DINCH_16_h_strict_GS4_MM4	3	Cluster 2	Q16822	vs_LPS	MINCH	8	4h_MINCH_10000nM		brown_DINCH_16_h
10105	16h_DINCH_10nM_ctrlLPS	-0.0312342713878549	0.542895695514238	RFT1	brown	UniprotAccessions-brown_DINCH_16_h_strict_GS4_MM4	1	Cluster 1	B5MDE0	vs_LPS	DINCH	9	16h_DINCH_10nM		brown_DINCH_16_h
11105	16h_DINCH_10nM_ctrlLPS	0.18978204525983	0.0215710490038944	CKMT1A	brown	UniprotAccessions-brown_DINCH_16_h_strict_GS4_MM4	2	Cluster 1	P12532	vs_LPS	DINCH	9	16h_DINCH_10nM	*	brown_DINCH_16_h
12105	16h_DINCH_10nM_ctrlLPS	-0.0169669054287766	0.327383939929826	PCK2	brown	UniprotAccessions-brown_DINCH_16_h_strict_GS4_MM4	3	Cluster 2	Q16822	vs_LPS	DINCH	9	16h_DINCH_10nM		brown_DINCH_16_h
7105	16h_DINCH_100nM_ctrlLPS	0.0226839581075892	0.518906556135994	RFT1	brown	UniprotAccessions-brown_DINCH_16_h_strict_GS4_MM4	1	Cluster 1	B5MDE0	vs_LPS	DINCH	10	16h_DINCH_100nM		brown_DINCH_16_h
8105	16h_DINCH_100nM_ctrlLPS	0.127527828412536	0.338717025066945	CKMT1A	brown	UniprotAccessions-brown_DINCH_16_h_strict_GS4_MM4	2	Cluster 1	P12532	vs_LPS	DINCH	10	16h_DINCH_100nM		brown_DINCH_16_h
9105	16h_DINCH_100nM_ctrlLPS	-0.00159387834262362	0.964640171974144	PCK2	brown	UniprotAccessions-brown_DINCH_16_h_strict_GS4_MM4	3	Cluster 2	Q16822	vs_LPS	DINCH	10	16h_DINCH_100nM		brown_DINCH_16_h
4105	16h_DINCH_1000nM_ctrlLPS	-0.0630836094479532	0.0210334544043103	RFT1	brown	UniprotAccessions-brown_DINCH_16_h_strict_GS4_MM4	1	Cluster 1	B5MDE0	vs_LPS	DINCH	11	16h_DINCH_1000nM	*	brown_DINCH_16_h
5105	16h_DINCH_1000nM_ctrlLPS	0.0885241406290184	0.0709069191058297	CKMT1A	brown	UniprotAccessions-brown_DINCH_16_h_strict_GS4_MM4	2	Cluster 1	P12532	vs_LPS	DINCH	11	16h_DINCH_1000nM		brown_DINCH_16_h
6105	16h_DINCH_1000nM_ctrlLPS	-0.0224301893264916	0.373921638761159	PCK2	brown	UniprotAccessions-brown_DINCH_16_h_strict_GS4_MM4	3	Cluster 2	Q16822	vs_LPS	DINCH	11	16h_DINCH_1000nM		brown_DINCH_16_h
11005	16h_DINCH_10000nM_ctrlLPS	0.0110482431574576	0.896271833276754	RFT1	brown	UniprotAccessions-brown_DINCH_16_h_strict_GS4_MM4	1	Cluster 1	B5MDE0	vs_LPS	DINCH	12	16h_DINCH_10000nM		brown_DINCH_16_h
2771	16h_DINCH_10000nM_ctrlLPS	0.188916338511752	0.374271622852101	CKMT1A	brown	UniprotAccessions-brown_DINCH_16_h_strict_GS4_MM4	2	Cluster 1	P12532	vs_LPS	DINCH	12	16h_DINCH_10000nM		brown_DINCH_16_h
3105	16h_DINCH_10000nM_ctrlLPS	-0.0111067505877407	0.651706400841163	PCK2	brown	UniprotAccessions-brown_DINCH_16_h_strict_GS4_MM4	3	Cluster 2	Q16822	vs_LPS	DINCH	12	16h_DINCH_10000nM		brown_DINCH_16_h
22105	16h_MINCH_10nM_ctrlLPS	0.0783609224141273	0.0783979156719497	RFT1	brown	UniprotAccessions-brown_DINCH_16_h_strict_GS4_MM4	1	Cluster 1	B5MDE0	vs_LPS	MINCH	13	16h_MINCH_10nM		brown_DINCH_16_h
23105	16h_MINCH_10nM_ctrlLPS	0.172313846748855	0.0254040041572016	CKMT1A	brown	UniprotAccessions-brown_DINCH_16_h_strict_GS4_MM4	2	Cluster 1	P12532	vs_LPS	MINCH	13	16h_MINCH_10nM	*	brown_DINCH_16_h
24105	16h_MINCH_10nM_ctrlLPS	0.0140933511616142	0.614322184761165	PCK2	brown	UniprotAccessions-brown_DINCH_16_h_strict_GS4_MM4	3	Cluster 2	Q16822	vs_LPS	MINCH	13	16h_MINCH_10nM		brown_DINCH_16_h
19105	16h_MINCH_100nM_ctrlLPS	0.109149321981442	0.00363305863904945	RFT1	brown	UniprotAccessions-brown_DINCH_16_h_strict_GS4_MM4	1	Cluster 1	B5MDE0	vs_LPS	MINCH	14	16h_MINCH_100nM	**	brown_DINCH_16_h
20105	16h_MINCH_100nM_ctrlLPS	0.297792379733896	0.0414553877686818	CKMT1A	brown	UniprotAccessions-brown_DINCH_16_h_strict_GS4_MM4	2	Cluster 1	P12532	vs_LPS	MINCH	14	16h_MINCH_100nM	*	brown_DINCH_16_h
21105	16h_MINCH_100nM_ctrlLPS	0.0110241706101587	0.586121513083634	PCK2	brown	UniprotAccessions-brown_DINCH_16_h_strict_GS4_MM4	3	Cluster 2	Q16822	vs_LPS	MINCH	14	16h_MINCH_100nM		brown_DINCH_16_h
16105	16h_MINCH_1000nM_ctrlLPS	0.121800376926728	0.233863870975314	RFT1	brown	UniprotAccessions-brown_DINCH_16_h_strict_GS4_MM4	1	Cluster 1	B5MDE0	vs_LPS	MINCH	15	16h_MINCH_1000nM		brown_DINCH_16_h
17105	16h_MINCH_1000nM_ctrlLPS	0.248846432713506	0.215459282015457	CKMT1A	brown	UniprotAccessions-brown_DINCH_16_h_strict_GS4_MM4	2	Cluster 1	P12532	vs_LPS	MINCH	15	16h_MINCH_1000nM		brown_DINCH_16_h
18105	16h_MINCH_1000nM_ctrlLPS	0.0255516964736737	0.461889815423905	PCK2	brown	UniprotAccessions-brown_DINCH_16_h_strict_GS4_MM4	3	Cluster 2	Q16822	vs_LPS	MINCH	15	16h_MINCH_1000nM		brown_DINCH_16_h
13105	16h_MINCH_10000nM_ctrlLPS	0.102738441494607	0.134669389021431	RFT1	brown	UniprotAccessions-brown_DINCH_16_h_strict_GS4_MM4	1	Cluster 1	B5MDE0	vs_LPS	MINCH	16	16h_MINCH_10000nM		brown_DINCH_16_h
14105	16h_MINCH_10000nM_ctrlLPS	0.132941085162152	0.20518284082981	CKMT1A	brown	UniprotAccessions-brown_DINCH_16_h_strict_GS4_MM4	2	Cluster 1	P12532	vs_LPS	MINCH	16	16h_MINCH_10000nM		brown_DINCH_16_h
15105	16h_MINCH_10000nM_ctrlLPS	0.0350080923795916	0.336328711048247	PCK2	brown	UniprotAccessions-brown_DINCH_16_h_strict_GS4_MM4	3	Cluster 2	Q16822	vs_LPS	MINCH	16	16h_MINCH_10000nM		brown_DINCH_16_h
3415	1d_DINCH_10nM_ctrlLPS	NA	NA	RFT1	brown	UniprotAccessions-brown_DINCH_16_h_strict_GS4_MM4	1	Cluster 1	B5MDE0	vs_LPS	DINCH	17	1d_DINCH_10nM		brown_DINCH_16_h
3515	1d_DINCH_10nM_ctrlLPS	NA	NA	CKMT1A	brown	UniprotAccessions-brown_DINCH_16_h_strict_GS4_MM4	2	Cluster 1	P12532	vs_LPS	DINCH	17	1d_DINCH_10nM		brown_DINCH_16_h
3615	1d_DINCH_10nM_ctrlLPS	0.03999280818809	0.00224062134795257	PCK2	brown	UniprotAccessions-brown_DINCH_16_h_strict_GS4_MM4	3	Cluster 2	Q16822	vs_LPS	DINCH	17	1d_DINCH_10nM	**	brown_DINCH_16_h
3115	1d_DINCH_100nM_ctrlLPS	NA	NA	RFT1	brown	UniprotAccessions-brown_DINCH_16_h_strict_GS4_MM4	1	Cluster 1	B5MDE0	vs_LPS	DINCH	18	1d_DINCH_100nM		brown_DINCH_16_h
3215	1d_DINCH_100nM_ctrlLPS	NA	NA	CKMT1A	brown	UniprotAccessions-brown_DINCH_16_h_strict_GS4_MM4	2	Cluster 1	P12532	vs_LPS	DINCH	18	1d_DINCH_100nM		brown_DINCH_16_h
3315	1d_DINCH_100nM_ctrlLPS	0.048660518427888	0.0153255444540608	PCK2	brown	UniprotAccessions-brown_DINCH_16_h_strict_GS4_MM4	3	Cluster 2	Q16822	vs_LPS	DINCH	18	1d_DINCH_100nM	*	brown_DINCH_16_h
2815	1d_DINCH_1000nM_ctrlLPS	NA	NA	RFT1	brown	UniprotAccessions-brown_DINCH_16_h_strict_GS4_MM4	1	Cluster 1	B5MDE0	vs_LPS	DINCH	19	1d_DINCH_1000nM		brown_DINCH_16_h
2915	1d_DINCH_1000nM_ctrlLPS	NA	NA	CKMT1A	brown	UniprotAccessions-brown_DINCH_16_h_strict_GS4_MM4	2	Cluster 1	P12532	vs_LPS	DINCH	19	1d_DINCH_1000nM		brown_DINCH_16_h
3015	1d_DINCH_1000nM_ctrlLPS	0.00995898398691697	0.408112183253611	PCK2	brown	UniprotAccessions-brown_DINCH_16_h_strict_GS4_MM4	3	Cluster 2	Q16822	vs_LPS	DINCH	19	1d_DINCH_1000nM		brown_DINCH_16_h
25105	1d_DINCH_10000nM_ctrlLPS	NA	NA	RFT1	brown	UniprotAccessions-brown_DINCH_16_h_strict_GS4_MM4	1	Cluster 1	B5MDE0	vs_LPS	DINCH	20	1d_DINCH_10000nM		brown_DINCH_16_h
26105	1d_DINCH_10000nM_ctrlLPS	NA	NA	CKMT1A	brown	UniprotAccessions-brown_DINCH_16_h_strict_GS4_MM4	2	Cluster 1	P12532	vs_LPS	DINCH	20	1d_DINCH_10000nM		brown_DINCH_16_h
2772	1d_DINCH_10000nM_ctrlLPS	0.0511443744713268	0.0417293114376023	PCK2	brown	UniprotAccessions-brown_DINCH_16_h_strict_GS4_MM4	3	Cluster 2	Q16822	vs_LPS	DINCH	20	1d_DINCH_10000nM	*	brown_DINCH_16_h
4615	1d_MINCH_10nM_ctrlLPS	NA	NA	RFT1	brown	UniprotAccessions-brown_DINCH_16_h_strict_GS4_MM4	1	Cluster 1	B5MDE0	vs_LPS	MINCH	21	1d_MINCH_10nM		brown_DINCH_16_h
4715	1d_MINCH_10nM_ctrlLPS	NA	NA	CKMT1A	brown	UniprotAccessions-brown_DINCH_16_h_strict_GS4_MM4	2	Cluster 1	P12532	vs_LPS	MINCH	21	1d_MINCH_10nM		brown_DINCH_16_h
4815	1d_MINCH_10nM_ctrlLPS	0.0619347653647026	0.0284416038458412	PCK2	brown	UniprotAccessions-brown_DINCH_16_h_strict_GS4_MM4	3	Cluster 2	Q16822	vs_LPS	MINCH	21	1d_MINCH_10nM	*	brown_DINCH_16_h
4315	1d_MINCH_100nM_ctrlLPS	NA	NA	RFT1	brown	UniprotAccessions-brown_DINCH_16_h_strict_GS4_MM4	1	Cluster 1	B5MDE0	vs_LPS	MINCH	22	1d_MINCH_100nM		brown_DINCH_16_h
4415	1d_MINCH_100nM_ctrlLPS	NA	NA	CKMT1A	brown	UniprotAccessions-brown_DINCH_16_h_strict_GS4_MM4	2	Cluster 1	P12532	vs_LPS	MINCH	22	1d_MINCH_100nM		brown_DINCH_16_h
4515	1d_MINCH_100nM_ctrlLPS	0.0660603964356968	0.00650414481351018	PCK2	brown	UniprotAccessions-brown_DINCH_16_h_strict_GS4_MM4	3	Cluster 2	Q16822	vs_LPS	MINCH	22	1d_MINCH_100nM	**	brown_DINCH_16_h
4015	1d_MINCH_1000nM_ctrlLPS	NA	NA	RFT1	brown	UniprotAccessions-brown_DINCH_16_h_strict_GS4_MM4	1	Cluster 1	B5MDE0	vs_LPS	MINCH	23	1d_MINCH_1000nM		brown_DINCH_16_h
4115	1d_MINCH_1000nM_ctrlLPS	NA	NA	CKMT1A	brown	UniprotAccessions-brown_DINCH_16_h_strict_GS4_MM4	2	Cluster 1	P12532	vs_LPS	MINCH	23	1d_MINCH_1000nM		brown_DINCH_16_h
4215	1d_MINCH_1000nM_ctrlLPS	0.0717777168715094	0.00111809187230623	PCK2	brown	UniprotAccessions-brown_DINCH_16_h_strict_GS4_MM4	3	Cluster 2	Q16822	vs_LPS	MINCH	23	1d_MINCH_1000nM	**	brown_DINCH_16_h
3715	1d_MINCH_10000nM_ctrlLPS	NA	NA	RFT1	brown	UniprotAccessions-brown_DINCH_16_h_strict_GS4_MM4	1	Cluster 1	B5MDE0	vs_LPS	MINCH	24	1d_MINCH_10000nM		brown_DINCH_16_h
3815	1d_MINCH_10000nM_ctrlLPS	NA	NA	CKMT1A	brown	UniprotAccessions-brown_DINCH_16_h_strict_GS4_MM4	2	Cluster 1	P12532	vs_LPS	MINCH	24	1d_MINCH_10000nM		brown_DINCH_16_h
3915	1d_MINCH_10000nM_ctrlLPS	0.0548494372397484	0.0216104972062615	PCK2	brown	UniprotAccessions-brown_DINCH_16_h_strict_GS4_MM4	3	Cluster 2	Q16822	vs_LPS	MINCH	24	1d_MINCH_10000nM	*	brown_DINCH_16_h
628	4h_DINCH_10nM_ctrlLPS	0.652305463583814	0.0272381888702417	APOOL	brown	UniprotAccessions-brown_DINCH_4_h_strict_GS4_MM4	4	Cluster 1	A0A087WUX8	vs_LPS	DINCH	1	4h_DINCH_10nM	*	brown_DINCH_4_h
629	4h_DINCH_10nM_ctrlLPS	0.461808014589833	0.0392059016540963	PVR	brown	UniprotAccessions-brown_DINCH_4_h_strict_GS4_MM4	14	Cluster 2	A0A0A0MSA9	vs_LPS	DINCH	1	4h_DINCH_10nM	*	brown_DINCH_4_h
630	4h_DINCH_10nM_ctrlLPS	0.538236642499083	0.125858694860172	BTAF1	brown	UniprotAccessions-brown_DINCH_4_h_strict_GS4_MM4	18	Cluster 2	A0A0A0MTH9	vs_LPS	DINCH	1	4h_DINCH_10nM		brown_DINCH_4_h
631	4h_DINCH_10nM_ctrlLPS	0.10651583970476	0.122228407652065	NRDC	brown	UniprotAccessions-brown_DINCH_4_h_strict_GS4_MM4	10	Cluster 3	B1AKJ5	vs_LPS	DINCH	1	4h_DINCH_10nM		brown_DINCH_4_h
632	4h_DINCH_10nM_ctrlLPS	0.0902853747823264	0.209020862759442	ILF2	brown	UniprotAccessions-brown_DINCH_4_h_strict_GS4_MM4	31	Cluster 3	B4DY09	vs_LPS	DINCH	1	4h_DINCH_10nM		brown_DINCH_4_h
633	4h_DINCH_10nM_ctrlLPS	0.541278601012501	0.0405680568789047	RFT1	brown	UniprotAccessions-brown_DINCH_4_h_strict_GS4_MM4	11	Cluster 1	B5MDE0	vs_LPS	DINCH	1	4h_DINCH_10nM	*	brown_DINCH_4_h
634	4h_DINCH_10nM_ctrlLPS	0.244337503406901	0.0727738593982852	PAIP1	brown	UniprotAccessions-brown_DINCH_4_h_strict_GS4_MM4	16	Cluster 3	D6REB4	vs_LPS	DINCH	1	4h_DINCH_10nM		brown_DINCH_4_h
635	4h_DINCH_10nM_ctrlLPS	0.370326824711147	0.00724167988912994	DENND3	brown	UniprotAccessions-brown_DINCH_4_h_strict_GS4_MM4	17	Cluster 2	E9PF32	vs_LPS	DINCH	1	4h_DINCH_10nM	**	brown_DINCH_4_h
636	4h_DINCH_10nM_ctrlLPS	0.649503584402895	0.0393156408531095	TYK2	brown	UniprotAccessions-brown_DINCH_4_h_strict_GS4_MM4	24	Cluster 1	E9PM19	vs_LPS	DINCH	1	4h_DINCH_10nM	*	brown_DINCH_4_h
637	4h_DINCH_10nM_ctrlLPS	0.144710432164332	0.131885081956028	RTCA	brown	UniprotAccessions-brown_DINCH_4_h_strict_GS4_MM4	5	Cluster 3	O00442	vs_LPS	DINCH	1	4h_DINCH_10nM		brown_DINCH_4_h
638	4h_DINCH_10nM_ctrlLPS	0.200924262822568	0.151101307015924	ZW10	brown	UniprotAccessions-brown_DINCH_4_h_strict_GS4_MM4	20	Cluster 3	O43264	vs_LPS	DINCH	1	4h_DINCH_10nM		brown_DINCH_4_h
639	4h_DINCH_10nM_ctrlLPS	0.993381576692046	0.000810798724644705	CKMT1A	brown	UniprotAccessions-brown_DINCH_4_h_strict_GS4_MM4	7	Cluster 1	P12532	vs_LPS	DINCH	1	4h_DINCH_10nM	***	brown_DINCH_4_h
640	4h_DINCH_10nM_ctrlLPS	0.224641703326566	0.228598748614919	MIF	brown	UniprotAccessions-brown_DINCH_4_h_strict_GS4_MM4	21	Cluster 4	P14174	vs_LPS	DINCH	1	4h_DINCH_10nM		brown_DINCH_4_h
641	4h_DINCH_10nM_ctrlLPS	0.148797866229129	0.12646292627256	GNPDA1	brown	UniprotAccessions-brown_DINCH_4_h_strict_GS4_MM4	19	Cluster 3	P46926	vs_LPS	DINCH	1	4h_DINCH_10nM		brown_DINCH_4_h
642	4h_DINCH_10nM_ctrlLPS	0.386081141739231	0.000601902849956636	ALDH3A2	brown	UniprotAccessions-brown_DINCH_4_h_strict_GS4_MM4	13	Cluster 2	P51648	vs_LPS	DINCH	1	4h_DINCH_10nM	***	brown_DINCH_4_h
643	4h_DINCH_10nM_ctrlLPS	0.103134208894063	0.0469007873668182	SUCLG1	brown	UniprotAccessions-brown_DINCH_4_h_strict_GS4_MM4	8	Cluster 3	P53597	vs_LPS	DINCH	1	4h_DINCH_10nM	*	brown_DINCH_4_h
644	4h_DINCH_10nM_ctrlLPS	0.0293316509775836	0.271161936422484	EIF3E	brown	UniprotAccessions-brown_DINCH_4_h_strict_GS4_MM4	28	Cluster 3	P60228	vs_LPS	DINCH	1	4h_DINCH_10nM		brown_DINCH_4_h
645	4h_DINCH_10nM_ctrlLPS	0.138762640766899	0.108233851566931	RAC1	brown	UniprotAccessions-brown_DINCH_4_h_strict_GS4_MM4	15	Cluster 3	P63000	vs_LPS	DINCH	1	4h_DINCH_10nM		brown_DINCH_4_h
646	4h_DINCH_10nM_ctrlLPS	0.0611074792054573	0.38542167924465	RAE1	brown	UniprotAccessions-brown_DINCH_4_h_strict_GS4_MM4	26	Cluster 3	P78406	vs_LPS	DINCH	1	4h_DINCH_10nM		brown_DINCH_4_h
647	4h_DINCH_10nM_ctrlLPS	0.162308150183785	0.161425608556074	ALDH6A1	brown	UniprotAccessions-brown_DINCH_4_h_strict_GS4_MM4	30	Cluster 3	Q02252	vs_LPS	DINCH	1	4h_DINCH_10nM		brown_DINCH_4_h
648	4h_DINCH_10nM_ctrlLPS	0.165593135511295	0.21435188820653	NUP160	brown	UniprotAccessions-brown_DINCH_4_h_strict_GS4_MM4	23	Cluster 3	Q12769	vs_LPS	DINCH	1	4h_DINCH_10nM		brown_DINCH_4_h
649	4h_DINCH_10nM_ctrlLPS	0.475343112898796	0.029710131579636	MAVS	brown	UniprotAccessions-brown_DINCH_4_h_strict_GS4_MM4	25	Cluster 1	Q7Z434	vs_LPS	DINCH	1	4h_DINCH_10nM	*	brown_DINCH_4_h
650	4h_DINCH_10nM_ctrlLPS	0.365487908768772	0.0530671030778157	ITPRIP	brown	UniprotAccessions-brown_DINCH_4_h_strict_GS4_MM4	2	Cluster 2	Q8IWB1	vs_LPS	DINCH	1	4h_DINCH_10nM		brown_DINCH_4_h
651	4h_DINCH_10nM_ctrlLPS	0.0564333402167548	0.0308265808352244	TUBB6	brown	UniprotAccessions-brown_DINCH_4_h_strict_GS4_MM4	27	Cluster 3	Q9BUF5	vs_LPS	DINCH	1	4h_DINCH_10nM	*	brown_DINCH_4_h
652	4h_DINCH_10nM_ctrlLPS	0.243598634320469	0.0101401368865581	BOLA2	brown	UniprotAccessions-brown_DINCH_4_h_strict_GS4_MM4	3	Cluster 2	Q9H3K6	vs_LPS	DINCH	1	4h_DINCH_10nM	*	brown_DINCH_4_h
653	4h_DINCH_10nM_ctrlLPS	0.215421587578832	0.0321922405056953	RRAGC	brown	UniprotAccessions-brown_DINCH_4_h_strict_GS4_MM4	32	Cluster 2	Q9HB90	vs_LPS	DINCH	1	4h_DINCH_10nM	*	brown_DINCH_4_h
654	4h_DINCH_10nM_ctrlLPS	0.359848901518623	0.0401225793696885	OSGEP	brown	UniprotAccessions-brown_DINCH_4_h_strict_GS4_MM4	6	Cluster 2	Q9NPF4	vs_LPS	DINCH	1	4h_DINCH_10nM	*	brown_DINCH_4_h
655	4h_DINCH_10nM_ctrlLPS	0.3522984894547	0.00678100870987633	BABAM2	brown	UniprotAccessions-brown_DINCH_4_h_strict_GS4_MM4	22	Cluster 2	Q9NXR7	vs_LPS	DINCH	1	4h_DINCH_10nM	**	brown_DINCH_4_h
656	4h_DINCH_10nM_ctrlLPS	0.714676077106019	0.0989644293142517	SWAP70	brown	UniprotAccessions-brown_DINCH_4_h_strict_GS4_MM4	9	Cluster 1	Q9UH65	vs_LPS	DINCH	1	4h_DINCH_10nM		brown_DINCH_4_h
657	4h_DINCH_10nM_ctrlLPS	0.175710131783921	0.217317027749498	CYB5R1	brown	UniprotAccessions-brown_DINCH_4_h_strict_GS4_MM4	1	Cluster 2	Q9UHQ9	vs_LPS	DINCH	1	4h_DINCH_10nM		brown_DINCH_4_h
658	4h_DINCH_10nM_ctrlLPS	0.102126834394243	0.0803677352197117	FAF1	brown	UniprotAccessions-brown_DINCH_4_h_strict_GS4_MM4	33	Cluster 3	Q9UNN5	vs_LPS	DINCH	1	4h_DINCH_10nM		brown_DINCH_4_h
659	4h_DINCH_10nM_ctrlLPS	0.425884498335556	0.0525613452171181	TRAPPC4	brown	UniprotAccessions-brown_DINCH_4_h_strict_GS4_MM4	12	Cluster 2	Q9Y296	vs_LPS	DINCH	1	4h_DINCH_10nM		brown_DINCH_4_h
660	4h_DINCH_10nM_ctrlLPS	0.463990688219771	0.00608835908745329	WBP11	brown	UniprotAccessions-brown_DINCH_4_h_strict_GS4_MM4	29	Cluster 1	Q9Y2W2	vs_LPS	DINCH	1	4h_DINCH_10nM	**	brown_DINCH_4_h
595	4h_DINCH_100nM_ctrlLPS	0.512812962034472	0.062119908217642	APOOL	brown	UniprotAccessions-brown_DINCH_4_h_strict_GS4_MM4	4	Cluster 1	A0A087WUX8	vs_LPS	DINCH	2	4h_DINCH_100nM		brown_DINCH_4_h
596	4h_DINCH_100nM_ctrlLPS	0.582723816402946	0.0368512673894582	PVR	brown	UniprotAccessions-brown_DINCH_4_h_strict_GS4_MM4	14	Cluster 2	A0A0A0MSA9	vs_LPS	DINCH	2	4h_DINCH_100nM	*	brown_DINCH_4_h
597	4h_DINCH_100nM_ctrlLPS	0.531429863850008	0.142838796822485	BTAF1	brown	UniprotAccessions-brown_DINCH_4_h_strict_GS4_MM4	18	Cluster 2	A0A0A0MTH9	vs_LPS	DINCH	2	4h_DINCH_100nM		brown_DINCH_4_h
598	4h_DINCH_100nM_ctrlLPS	0.146120405925205	0.0180500858592086	NRDC	brown	UniprotAccessions-brown_DINCH_4_h_strict_GS4_MM4	10	Cluster 3	B1AKJ5	vs_LPS	DINCH	2	4h_DINCH_100nM	*	brown_DINCH_4_h
599	4h_DINCH_100nM_ctrlLPS	0.118723389614322	0.0865255125323761	ILF2	brown	UniprotAccessions-brown_DINCH_4_h_strict_GS4_MM4	31	Cluster 3	B4DY09	vs_LPS	DINCH	2	4h_DINCH_100nM		brown_DINCH_4_h
600	4h_DINCH_100nM_ctrlLPS	0.561991338205144	0.0134015644067476	RFT1	brown	UniprotAccessions-brown_DINCH_4_h_strict_GS4_MM4	11	Cluster 1	B5MDE0	vs_LPS	DINCH	2	4h_DINCH_100nM	*	brown_DINCH_4_h
601	4h_DINCH_100nM_ctrlLPS	0.168356174450031	0.040865424888553	PAIP1	brown	UniprotAccessions-brown_DINCH_4_h_strict_GS4_MM4	16	Cluster 3	D6REB4	vs_LPS	DINCH	2	4h_DINCH_100nM	*	brown_DINCH_4_h
602	4h_DINCH_100nM_ctrlLPS	0.43940474689575	0.0111385721132735	DENND3	brown	UniprotAccessions-brown_DINCH_4_h_strict_GS4_MM4	17	Cluster 2	E9PF32	vs_LPS	DINCH	2	4h_DINCH_100nM	*	brown_DINCH_4_h
603	4h_DINCH_100nM_ctrlLPS	0.675467781391886	0.00177395137798194	TYK2	brown	UniprotAccessions-brown_DINCH_4_h_strict_GS4_MM4	24	Cluster 1	E9PM19	vs_LPS	DINCH	2	4h_DINCH_100nM	**	brown_DINCH_4_h
604	4h_DINCH_100nM_ctrlLPS	0.174478800594789	0.0487229759032744	RTCA	brown	UniprotAccessions-brown_DINCH_4_h_strict_GS4_MM4	5	Cluster 3	O00442	vs_LPS	DINCH	2	4h_DINCH_100nM	*	brown_DINCH_4_h
605	4h_DINCH_100nM_ctrlLPS	0.196989047533824	0.0800404132677208	ZW10	brown	UniprotAccessions-brown_DINCH_4_h_strict_GS4_MM4	20	Cluster 3	O43264	vs_LPS	DINCH	2	4h_DINCH_100nM		brown_DINCH_4_h
606	4h_DINCH_100nM_ctrlLPS	0.916889239430105	0.000403252742396455	CKMT1A	brown	UniprotAccessions-brown_DINCH_4_h_strict_GS4_MM4	7	Cluster 1	P12532	vs_LPS	DINCH	2	4h_DINCH_100nM	***	brown_DINCH_4_h
607	4h_DINCH_100nM_ctrlLPS	0.458387392027187	0.00574460641879765	MIF	brown	UniprotAccessions-brown_DINCH_4_h_strict_GS4_MM4	21	Cluster 4	P14174	vs_LPS	DINCH	2	4h_DINCH_100nM	**	brown_DINCH_4_h
608	4h_DINCH_100nM_ctrlLPS	0.195394144788423	0.0929497066934448	GNPDA1	brown	UniprotAccessions-brown_DINCH_4_h_strict_GS4_MM4	19	Cluster 3	P46926	vs_LPS	DINCH	2	4h_DINCH_100nM		brown_DINCH_4_h
609	4h_DINCH_100nM_ctrlLPS	0.347923159794347	0.139234261118301	ALDH3A2	brown	UniprotAccessions-brown_DINCH_4_h_strict_GS4_MM4	13	Cluster 2	P51648	vs_LPS	DINCH	2	4h_DINCH_100nM		brown_DINCH_4_h
610	4h_DINCH_100nM_ctrlLPS	0.109739065108035	0.000712170469849596	SUCLG1	brown	UniprotAccessions-brown_DINCH_4_h_strict_GS4_MM4	8	Cluster 3	P53597	vs_LPS	DINCH	2	4h_DINCH_100nM	***	brown_DINCH_4_h
611	4h_DINCH_100nM_ctrlLPS	0.0570943240895686	0.0350319740432383	EIF3E	brown	UniprotAccessions-brown_DINCH_4_h_strict_GS4_MM4	28	Cluster 3	P60228	vs_LPS	DINCH	2	4h_DINCH_100nM	*	brown_DINCH_4_h
612	4h_DINCH_100nM_ctrlLPS	0.18705014211864	0.0700252702544823	RAC1	brown	UniprotAccessions-brown_DINCH_4_h_strict_GS4_MM4	15	Cluster 3	P63000	vs_LPS	DINCH	2	4h_DINCH_100nM		brown_DINCH_4_h
613	4h_DINCH_100nM_ctrlLPS	0.0762280832408685	0.172271643302055	RAE1	brown	UniprotAccessions-brown_DINCH_4_h_strict_GS4_MM4	26	Cluster 3	P78406	vs_LPS	DINCH	2	4h_DINCH_100nM		brown_DINCH_4_h
614	4h_DINCH_100nM_ctrlLPS	0.240522197327625	0.041485811193318	ALDH6A1	brown	UniprotAccessions-brown_DINCH_4_h_strict_GS4_MM4	30	Cluster 3	Q02252	vs_LPS	DINCH	2	4h_DINCH_100nM	*	brown_DINCH_4_h
615	4h_DINCH_100nM_ctrlLPS	0.195835093502006	0.0898152245517985	NUP160	brown	UniprotAccessions-brown_DINCH_4_h_strict_GS4_MM4	23	Cluster 3	Q12769	vs_LPS	DINCH	2	4h_DINCH_100nM		brown_DINCH_4_h
616	4h_DINCH_100nM_ctrlLPS	0.426193914339453	0.0417128218633599	MAVS	brown	UniprotAccessions-brown_DINCH_4_h_strict_GS4_MM4	25	Cluster 1	Q7Z434	vs_LPS	DINCH	2	4h_DINCH_100nM	*	brown_DINCH_4_h
617	4h_DINCH_100nM_ctrlLPS	0.402715384608153	0.0515236511625038	ITPRIP	brown	UniprotAccessions-brown_DINCH_4_h_strict_GS4_MM4	2	Cluster 2	Q8IWB1	vs_LPS	DINCH	2	4h_DINCH_100nM		brown_DINCH_4_h
618	4h_DINCH_100nM_ctrlLPS	0.0539965224485539	0.0236509305915899	TUBB6	brown	UniprotAccessions-brown_DINCH_4_h_strict_GS4_MM4	27	Cluster 3	Q9BUF5	vs_LPS	DINCH	2	4h_DINCH_100nM	*	brown_DINCH_4_h
619	4h_DINCH_100nM_ctrlLPS	0.351523257587255	0.00915160697028605	BOLA2	brown	UniprotAccessions-brown_DINCH_4_h_strict_GS4_MM4	3	Cluster 2	Q9H3K6	vs_LPS	DINCH	2	4h_DINCH_100nM	**	brown_DINCH_4_h
620	4h_DINCH_100nM_ctrlLPS	0.282404983175887	0.0363135207368107	RRAGC	brown	UniprotAccessions-brown_DINCH_4_h_strict_GS4_MM4	32	Cluster 2	Q9HB90	vs_LPS	DINCH	2	4h_DINCH_100nM	*	brown_DINCH_4_h
621	4h_DINCH_100nM_ctrlLPS	0.447489407945154	0.0318563620625538	OSGEP	brown	UniprotAccessions-brown_DINCH_4_h_strict_GS4_MM4	6	Cluster 2	Q9NPF4	vs_LPS	DINCH	2	4h_DINCH_100nM	*	brown_DINCH_4_h
622	4h_DINCH_100nM_ctrlLPS	0.445261347035517	0.000307214987458486	BABAM2	brown	UniprotAccessions-brown_DINCH_4_h_strict_GS4_MM4	22	Cluster 2	Q9NXR7	vs_LPS	DINCH	2	4h_DINCH_100nM	***	brown_DINCH_4_h
623	4h_DINCH_100nM_ctrlLPS	0.815322248732928	0.0983513496456257	SWAP70	brown	UniprotAccessions-brown_DINCH_4_h_strict_GS4_MM4	9	Cluster 1	Q9UH65	vs_LPS	DINCH	2	4h_DINCH_100nM		brown_DINCH_4_h
624	4h_DINCH_100nM_ctrlLPS	0.284161921067554	0.0535225182036363	CYB5R1	brown	UniprotAccessions-brown_DINCH_4_h_strict_GS4_MM4	1	Cluster 2	Q9UHQ9	vs_LPS	DINCH	2	4h_DINCH_100nM		brown_DINCH_4_h
625	4h_DINCH_100nM_ctrlLPS	0.160849463173319	0.00700963052773339	FAF1	brown	UniprotAccessions-brown_DINCH_4_h_strict_GS4_MM4	33	Cluster 3	Q9UNN5	vs_LPS	DINCH	2	4h_DINCH_100nM	**	brown_DINCH_4_h
626	4h_DINCH_100nM_ctrlLPS	0.378066951934736	0.118545831175279	TRAPPC4	brown	UniprotAccessions-brown_DINCH_4_h_strict_GS4_MM4	12	Cluster 2	Q9Y296	vs_LPS	DINCH	2	4h_DINCH_100nM		brown_DINCH_4_h
627	4h_DINCH_100nM_ctrlLPS	0.528523814428425	0.000783112322198209	WBP11	brown	UniprotAccessions-brown_DINCH_4_h_strict_GS4_MM4	29	Cluster 1	Q9Y2W2	vs_LPS	DINCH	2	4h_DINCH_100nM	***	brown_DINCH_4_h
562	4h_DINCH_1000nM_ctrlLPS	0.691124741649022	3.01988212783169e-05	APOOL	brown	UniprotAccessions-brown_DINCH_4_h_strict_GS4_MM4	4	Cluster 1	A0A087WUX8	vs_LPS	DINCH	3	4h_DINCH_1000nM	***	brown_DINCH_4_h
563	4h_DINCH_1000nM_ctrlLPS	0.479415494554525	0.0297826220362164	PVR	brown	UniprotAccessions-brown_DINCH_4_h_strict_GS4_MM4	14	Cluster 2	A0A0A0MSA9	vs_LPS	DINCH	3	4h_DINCH_1000nM	*	brown_DINCH_4_h
564	4h_DINCH_1000nM_ctrlLPS	0.564460377102308	0.151182086274538	BTAF1	brown	UniprotAccessions-brown_DINCH_4_h_strict_GS4_MM4	18	Cluster 2	A0A0A0MTH9	vs_LPS	DINCH	3	4h_DINCH_1000nM		brown_DINCH_4_h
565	4h_DINCH_1000nM_ctrlLPS	0.144834877026499	0.040306074839383	NRDC	brown	UniprotAccessions-brown_DINCH_4_h_strict_GS4_MM4	10	Cluster 3	B1AKJ5	vs_LPS	DINCH	3	4h_DINCH_1000nM	*	brown_DINCH_4_h
566	4h_DINCH_1000nM_ctrlLPS	0.0809487281165791	0.156495058300318	ILF2	brown	UniprotAccessions-brown_DINCH_4_h_strict_GS4_MM4	31	Cluster 3	B4DY09	vs_LPS	DINCH	3	4h_DINCH_1000nM		brown_DINCH_4_h
567	4h_DINCH_1000nM_ctrlLPS	0.627221544091138	0.029930886660757	RFT1	brown	UniprotAccessions-brown_DINCH_4_h_strict_GS4_MM4	11	Cluster 1	B5MDE0	vs_LPS	DINCH	3	4h_DINCH_1000nM	*	brown_DINCH_4_h
568	4h_DINCH_1000nM_ctrlLPS	0.30717845155072	0.0304543057778293	PAIP1	brown	UniprotAccessions-brown_DINCH_4_h_strict_GS4_MM4	16	Cluster 3	D6REB4	vs_LPS	DINCH	3	4h_DINCH_1000nM	*	brown_DINCH_4_h
569	4h_DINCH_1000nM_ctrlLPS	0.390934953737812	0.0713419676379144	DENND3	brown	UniprotAccessions-brown_DINCH_4_h_strict_GS4_MM4	17	Cluster 2	E9PF32	vs_LPS	DINCH	3	4h_DINCH_1000nM		brown_DINCH_4_h
570	4h_DINCH_1000nM_ctrlLPS	0.512944444222697	0.00127804864445333	TYK2	brown	UniprotAccessions-brown_DINCH_4_h_strict_GS4_MM4	24	Cluster 1	E9PM19	vs_LPS	DINCH	3	4h_DINCH_1000nM	**	brown_DINCH_4_h
571	4h_DINCH_1000nM_ctrlLPS	0.177508507831679	0.0950982378306433	RTCA	brown	UniprotAccessions-brown_DINCH_4_h_strict_GS4_MM4	5	Cluster 3	O00442	vs_LPS	DINCH	3	4h_DINCH_1000nM		brown_DINCH_4_h
572	4h_DINCH_1000nM_ctrlLPS	0.222061510031398	0.0418598239105533	ZW10	brown	UniprotAccessions-brown_DINCH_4_h_strict_GS4_MM4	20	Cluster 3	O43264	vs_LPS	DINCH	3	4h_DINCH_1000nM	*	brown_DINCH_4_h
573	4h_DINCH_1000nM_ctrlLPS	0.812261476413566	0.00253765389997783	CKMT1A	brown	UniprotAccessions-brown_DINCH_4_h_strict_GS4_MM4	7	Cluster 1	P12532	vs_LPS	DINCH	3	4h_DINCH_1000nM	**	brown_DINCH_4_h
574	4h_DINCH_1000nM_ctrlLPS	0.434173201698245	0.17841799928816	MIF	brown	UniprotAccessions-brown_DINCH_4_h_strict_GS4_MM4	21	Cluster 4	P14174	vs_LPS	DINCH	3	4h_DINCH_1000nM		brown_DINCH_4_h
575	4h_DINCH_1000nM_ctrlLPS	0.165901156648272	0.120612774800974	GNPDA1	brown	UniprotAccessions-brown_DINCH_4_h_strict_GS4_MM4	19	Cluster 3	P46926	vs_LPS	DINCH	3	4h_DINCH_1000nM		brown_DINCH_4_h
576	4h_DINCH_1000nM_ctrlLPS	0.365001873438339	0.0236856696074833	ALDH3A2	brown	UniprotAccessions-brown_DINCH_4_h_strict_GS4_MM4	13	Cluster 2	P51648	vs_LPS	DINCH	3	4h_DINCH_1000nM	*	brown_DINCH_4_h
577	4h_DINCH_1000nM_ctrlLPS	0.0983519999559033	0.0622426206225125	SUCLG1	brown	UniprotAccessions-brown_DINCH_4_h_strict_GS4_MM4	8	Cluster 3	P53597	vs_LPS	DINCH	3	4h_DINCH_1000nM		brown_DINCH_4_h
578	4h_DINCH_1000nM_ctrlLPS	0.0962751237248562	0.000278782102318025	EIF3E	brown	UniprotAccessions-brown_DINCH_4_h_strict_GS4_MM4	28	Cluster 3	P60228	vs_LPS	DINCH	3	4h_DINCH_1000nM	***	brown_DINCH_4_h
579	4h_DINCH_1000nM_ctrlLPS	0.146940318922382	0.141599765226338	RAC1	brown	UniprotAccessions-brown_DINCH_4_h_strict_GS4_MM4	15	Cluster 3	P63000	vs_LPS	DINCH	3	4h_DINCH_1000nM		brown_DINCH_4_h
580	4h_DINCH_1000nM_ctrlLPS	0.0975563696453473	0.239550029951746	RAE1	brown	UniprotAccessions-brown_DINCH_4_h_strict_GS4_MM4	26	Cluster 3	P78406	vs_LPS	DINCH	3	4h_DINCH_1000nM		brown_DINCH_4_h
581	4h_DINCH_1000nM_ctrlLPS	0.285282813981639	0.0548612389527384	ALDH6A1	brown	UniprotAccessions-brown_DINCH_4_h_strict_GS4_MM4	30	Cluster 3	Q02252	vs_LPS	DINCH	3	4h_DINCH_1000nM		brown_DINCH_4_h
582	4h_DINCH_1000nM_ctrlLPS	0.190021454532877	0.0587754092558807	NUP160	brown	UniprotAccessions-brown_DINCH_4_h_strict_GS4_MM4	23	Cluster 3	Q12769	vs_LPS	DINCH	3	4h_DINCH_1000nM		brown_DINCH_4_h
583	4h_DINCH_1000nM_ctrlLPS	0.495995198014185	0.0602546957927365	MAVS	brown	UniprotAccessions-brown_DINCH_4_h_strict_GS4_MM4	25	Cluster 1	Q7Z434	vs_LPS	DINCH	3	4h_DINCH_1000nM		brown_DINCH_4_h
584	4h_DINCH_1000nM_ctrlLPS	0.394235282400592	0.0171588628501692	ITPRIP	brown	UniprotAccessions-brown_DINCH_4_h_strict_GS4_MM4	2	Cluster 2	Q8IWB1	vs_LPS	DINCH	3	4h_DINCH_1000nM	*	brown_DINCH_4_h
585	4h_DINCH_1000nM_ctrlLPS	0.108379981924389	0.0151108008319957	TUBB6	brown	UniprotAccessions-brown_DINCH_4_h_strict_GS4_MM4	27	Cluster 3	Q9BUF5	vs_LPS	DINCH	3	4h_DINCH_1000nM	*	brown_DINCH_4_h
586	4h_DINCH_1000nM_ctrlLPS	0.334258603790975	0.0407472562862679	BOLA2	brown	UniprotAccessions-brown_DINCH_4_h_strict_GS4_MM4	3	Cluster 2	Q9H3K6	vs_LPS	DINCH	3	4h_DINCH_1000nM	*	brown_DINCH_4_h
587	4h_DINCH_1000nM_ctrlLPS	0.306544062164821	0.000368383395530974	RRAGC	brown	UniprotAccessions-brown_DINCH_4_h_strict_GS4_MM4	32	Cluster 2	Q9HB90	vs_LPS	DINCH	3	4h_DINCH_1000nM	***	brown_DINCH_4_h
588	4h_DINCH_1000nM_ctrlLPS	0.490401471264807	0.0162069746701179	OSGEP	brown	UniprotAccessions-brown_DINCH_4_h_strict_GS4_MM4	6	Cluster 2	Q9NPF4	vs_LPS	DINCH	3	4h_DINCH_1000nM	*	brown_DINCH_4_h
589	4h_DINCH_1000nM_ctrlLPS	0.267061056279337	0.0938937746523813	BABAM2	brown	UniprotAccessions-brown_DINCH_4_h_strict_GS4_MM4	22	Cluster 2	Q9NXR7	vs_LPS	DINCH	3	4h_DINCH_1000nM		brown_DINCH_4_h
590	4h_DINCH_1000nM_ctrlLPS	0.815957552197657	0.0761019279445608	SWAP70	brown	UniprotAccessions-brown_DINCH_4_h_strict_GS4_MM4	9	Cluster 1	Q9UH65	vs_LPS	DINCH	3	4h_DINCH_1000nM		brown_DINCH_4_h
591	4h_DINCH_1000nM_ctrlLPS	0.279375518688657	0.0460917727506193	CYB5R1	brown	UniprotAccessions-brown_DINCH_4_h_strict_GS4_MM4	1	Cluster 2	Q9UHQ9	vs_LPS	DINCH	3	4h_DINCH_1000nM	*	brown_DINCH_4_h
592	4h_DINCH_1000nM_ctrlLPS	0.0739706230859189	0.0302000721156352	FAF1	brown	UniprotAccessions-brown_DINCH_4_h_strict_GS4_MM4	33	Cluster 3	Q9UNN5	vs_LPS	DINCH	3	4h_DINCH_1000nM	*	brown_DINCH_4_h
593	4h_DINCH_1000nM_ctrlLPS	0.385496829161416	0.0835212559761976	TRAPPC4	brown	UniprotAccessions-brown_DINCH_4_h_strict_GS4_MM4	12	Cluster 2	Q9Y296	vs_LPS	DINCH	3	4h_DINCH_1000nM		brown_DINCH_4_h
594	4h_DINCH_1000nM_ctrlLPS	0.528811143797106	0.00531174733388489	WBP11	brown	UniprotAccessions-brown_DINCH_4_h_strict_GS4_MM4	29	Cluster 1	Q9Y2W2	vs_LPS	DINCH	3	4h_DINCH_1000nM	**	brown_DINCH_4_h
529	4h_DINCH_10000nM_ctrlLPS	0.55783666245819	0.0140154637355662	APOOL	brown	UniprotAccessions-brown_DINCH_4_h_strict_GS4_MM4	4	Cluster 1	A0A087WUX8	vs_LPS	DINCH	4	4h_DINCH_10000nM	*	brown_DINCH_4_h
530	4h_DINCH_10000nM_ctrlLPS	0.510284889452903	0.0401566905510657	PVR	brown	UniprotAccessions-brown_DINCH_4_h_strict_GS4_MM4	14	Cluster 2	A0A0A0MSA9	vs_LPS	DINCH	4	4h_DINCH_10000nM	*	brown_DINCH_4_h
531	4h_DINCH_10000nM_ctrlLPS	0.42246003705575	0.114394237003828	BTAF1	brown	UniprotAccessions-brown_DINCH_4_h_strict_GS4_MM4	18	Cluster 2	A0A0A0MTH9	vs_LPS	DINCH	4	4h_DINCH_10000nM		brown_DINCH_4_h
532	4h_DINCH_10000nM_ctrlLPS	0.142485363571901	0.117436309155926	NRDC	brown	UniprotAccessions-brown_DINCH_4_h_strict_GS4_MM4	10	Cluster 3	B1AKJ5	vs_LPS	DINCH	4	4h_DINCH_10000nM		brown_DINCH_4_h
533	4h_DINCH_10000nM_ctrlLPS	0.0223090566510038	0.73789426701746	ILF2	brown	UniprotAccessions-brown_DINCH_4_h_strict_GS4_MM4	31	Cluster 3	B4DY09	vs_LPS	DINCH	4	4h_DINCH_10000nM		brown_DINCH_4_h
534	4h_DINCH_10000nM_ctrlLPS	0.526189990442157	0.0575194348405982	RFT1	brown	UniprotAccessions-brown_DINCH_4_h_strict_GS4_MM4	11	Cluster 1	B5MDE0	vs_LPS	DINCH	4	4h_DINCH_10000nM		brown_DINCH_4_h
535	4h_DINCH_10000nM_ctrlLPS	0.226762464993436	0.121672373529769	PAIP1	brown	UniprotAccessions-brown_DINCH_4_h_strict_GS4_MM4	16	Cluster 3	D6REB4	vs_LPS	DINCH	4	4h_DINCH_10000nM		brown_DINCH_4_h
536	4h_DINCH_10000nM_ctrlLPS	0.334904515189273	0.0275745777158229	DENND3	brown	UniprotAccessions-brown_DINCH_4_h_strict_GS4_MM4	17	Cluster 2	E9PF32	vs_LPS	DINCH	4	4h_DINCH_10000nM	*	brown_DINCH_4_h
537	4h_DINCH_10000nM_ctrlLPS	0.85328106585103	0.000326277016091627	TYK2	brown	UniprotAccessions-brown_DINCH_4_h_strict_GS4_MM4	24	Cluster 1	E9PM19	vs_LPS	DINCH	4	4h_DINCH_10000nM	***	brown_DINCH_4_h
538	4h_DINCH_10000nM_ctrlLPS	0.143898121275638	0.180951135852691	RTCA	brown	UniprotAccessions-brown_DINCH_4_h_strict_GS4_MM4	5	Cluster 3	O00442	vs_LPS	DINCH	4	4h_DINCH_10000nM		brown_DINCH_4_h
539	4h_DINCH_10000nM_ctrlLPS	0.242780006004926	0.0528261117842918	ZW10	brown	UniprotAccessions-brown_DINCH_4_h_strict_GS4_MM4	20	Cluster 3	O43264	vs_LPS	DINCH	4	4h_DINCH_10000nM		brown_DINCH_4_h
540	4h_DINCH_10000nM_ctrlLPS	0.765073637297824	0.0204326719467447	CKMT1A	brown	UniprotAccessions-brown_DINCH_4_h_strict_GS4_MM4	7	Cluster 1	P12532	vs_LPS	DINCH	4	4h_DINCH_10000nM	*	brown_DINCH_4_h
541	4h_DINCH_10000nM_ctrlLPS	0.199601247386257	0.552070029946874	MIF	brown	UniprotAccessions-brown_DINCH_4_h_strict_GS4_MM4	21	Cluster 4	P14174	vs_LPS	DINCH	4	4h_DINCH_10000nM		brown_DINCH_4_h
542	4h_DINCH_10000nM_ctrlLPS	0.19002396705781	0.109339419346208	GNPDA1	brown	UniprotAccessions-brown_DINCH_4_h_strict_GS4_MM4	19	Cluster 3	P46926	vs_LPS	DINCH	4	4h_DINCH_10000nM		brown_DINCH_4_h
543	4h_DINCH_10000nM_ctrlLPS	0.531478842270689	0.0737755561446864	ALDH3A2	brown	UniprotAccessions-brown_DINCH_4_h_strict_GS4_MM4	13	Cluster 2	P51648	vs_LPS	DINCH	4	4h_DINCH_10000nM		brown_DINCH_4_h
544	4h_DINCH_10000nM_ctrlLPS	0.110848800864797	0.0158877035808716	SUCLG1	brown	UniprotAccessions-brown_DINCH_4_h_strict_GS4_MM4	8	Cluster 3	P53597	vs_LPS	DINCH	4	4h_DINCH_10000nM	*	brown_DINCH_4_h
545	4h_DINCH_10000nM_ctrlLPS	0.101328227359106	0.0137731829955618	EIF3E	brown	UniprotAccessions-brown_DINCH_4_h_strict_GS4_MM4	28	Cluster 3	P60228	vs_LPS	DINCH	4	4h_DINCH_10000nM	*	brown_DINCH_4_h
546	4h_DINCH_10000nM_ctrlLPS	0.116124840254847	0.199183097121611	RAC1	brown	UniprotAccessions-brown_DINCH_4_h_strict_GS4_MM4	15	Cluster 3	P63000	vs_LPS	DINCH	4	4h_DINCH_10000nM		brown_DINCH_4_h
547	4h_DINCH_10000nM_ctrlLPS	0.0992534697211807	0.304924265084814	RAE1	brown	UniprotAccessions-brown_DINCH_4_h_strict_GS4_MM4	26	Cluster 3	P78406	vs_LPS	DINCH	4	4h_DINCH_10000nM		brown_DINCH_4_h
548	4h_DINCH_10000nM_ctrlLPS	0.130018059930347	0.0954157132099261	ALDH6A1	brown	UniprotAccessions-brown_DINCH_4_h_strict_GS4_MM4	30	Cluster 3	Q02252	vs_LPS	DINCH	4	4h_DINCH_10000nM		brown_DINCH_4_h
549	4h_DINCH_10000nM_ctrlLPS	0.267921396011414	0.0430802746465089	NUP160	brown	UniprotAccessions-brown_DINCH_4_h_strict_GS4_MM4	23	Cluster 3	Q12769	vs_LPS	DINCH	4	4h_DINCH_10000nM	*	brown_DINCH_4_h
550	4h_DINCH_10000nM_ctrlLPS	0.554170718732222	0.0522048442358075	MAVS	brown	UniprotAccessions-brown_DINCH_4_h_strict_GS4_MM4	25	Cluster 1	Q7Z434	vs_LPS	DINCH	4	4h_DINCH_10000nM		brown_DINCH_4_h
551	4h_DINCH_10000nM_ctrlLPS	0.231413730719875	0.22317116798638	ITPRIP	brown	UniprotAccessions-brown_DINCH_4_h_strict_GS4_MM4	2	Cluster 2	Q8IWB1	vs_LPS	DINCH	4	4h_DINCH_10000nM		brown_DINCH_4_h
552	4h_DINCH_10000nM_ctrlLPS	0.113287042421882	0.12401797230934	TUBB6	brown	UniprotAccessions-brown_DINCH_4_h_strict_GS4_MM4	27	Cluster 3	Q9BUF5	vs_LPS	DINCH	4	4h_DINCH_10000nM		brown_DINCH_4_h
553	4h_DINCH_10000nM_ctrlLPS	0.503176981055192	0.0766918310428598	BOLA2	brown	UniprotAccessions-brown_DINCH_4_h_strict_GS4_MM4	3	Cluster 2	Q9H3K6	vs_LPS	DINCH	4	4h_DINCH_10000nM		brown_DINCH_4_h
554	4h_DINCH_10000nM_ctrlLPS	0.276550149389107	0.0733557198170449	RRAGC	brown	UniprotAccessions-brown_DINCH_4_h_strict_GS4_MM4	32	Cluster 2	Q9HB90	vs_LPS	DINCH	4	4h_DINCH_10000nM		brown_DINCH_4_h
555	4h_DINCH_10000nM_ctrlLPS	0.657662420392104	0.0294789698603265	OSGEP	brown	UniprotAccessions-brown_DINCH_4_h_strict_GS4_MM4	6	Cluster 2	Q9NPF4	vs_LPS	DINCH	4	4h_DINCH_10000nM	*	brown_DINCH_4_h
556	4h_DINCH_10000nM_ctrlLPS	0.395291211983224	0.0202848890171842	BABAM2	brown	UniprotAccessions-brown_DINCH_4_h_strict_GS4_MM4	22	Cluster 2	Q9NXR7	vs_LPS	DINCH	4	4h_DINCH_10000nM	*	brown_DINCH_4_h
557	4h_DINCH_10000nM_ctrlLPS	0.79357690926723	0.0261352255351032	SWAP70	brown	UniprotAccessions-brown_DINCH_4_h_strict_GS4_MM4	9	Cluster 1	Q9UH65	vs_LPS	DINCH	4	4h_DINCH_10000nM	*	brown_DINCH_4_h
558	4h_DINCH_10000nM_ctrlLPS	0.26211540803455	0.0427780542643911	CYB5R1	brown	UniprotAccessions-brown_DINCH_4_h_strict_GS4_MM4	1	Cluster 2	Q9UHQ9	vs_LPS	DINCH	4	4h_DINCH_10000nM	*	brown_DINCH_4_h
559	4h_DINCH_10000nM_ctrlLPS	0.112085123302763	0.00941191997672738	FAF1	brown	UniprotAccessions-brown_DINCH_4_h_strict_GS4_MM4	33	Cluster 3	Q9UNN5	vs_LPS	DINCH	4	4h_DINCH_10000nM	**	brown_DINCH_4_h
560	4h_DINCH_10000nM_ctrlLPS	0.333902061176635	0.112278759289092	TRAPPC4	brown	UniprotAccessions-brown_DINCH_4_h_strict_GS4_MM4	12	Cluster 2	Q9Y296	vs_LPS	DINCH	4	4h_DINCH_10000nM		brown_DINCH_4_h
561	4h_DINCH_10000nM_ctrlLPS	0.754693099983166	0.00896645032242436	WBP11	brown	UniprotAccessions-brown_DINCH_4_h_strict_GS4_MM4	29	Cluster 1	Q9Y2W2	vs_LPS	DINCH	4	4h_DINCH_10000nM	**	brown_DINCH_4_h
760	4h_MINCH_10nM_ctrlLPS	0.193388673664132	0.276150180879943	APOOL	brown	UniprotAccessions-brown_DINCH_4_h_strict_GS4_MM4	4	Cluster 1	A0A087WUX8	vs_LPS	MINCH	5	4h_MINCH_10nM		brown_DINCH_4_h
761	4h_MINCH_10nM_ctrlLPS	0.329501695109233	0.152819890207693	PVR	brown	UniprotAccessions-brown_DINCH_4_h_strict_GS4_MM4	14	Cluster 2	A0A0A0MSA9	vs_LPS	MINCH	5	4h_MINCH_10nM		brown_DINCH_4_h
762	4h_MINCH_10nM_ctrlLPS	0.34124028584089	0.184683869105987	BTAF1	brown	UniprotAccessions-brown_DINCH_4_h_strict_GS4_MM4	18	Cluster 2	A0A0A0MTH9	vs_LPS	MINCH	5	4h_MINCH_10nM		brown_DINCH_4_h
763	4h_MINCH_10nM_ctrlLPS	0.06797811816094	0.363697948366723	NRDC	brown	UniprotAccessions-brown_DINCH_4_h_strict_GS4_MM4	10	Cluster 3	B1AKJ5	vs_LPS	MINCH	5	4h_MINCH_10nM		brown_DINCH_4_h
764	4h_MINCH_10nM_ctrlLPS	0.0157075837976659	0.828565076940081	ILF2	brown	UniprotAccessions-brown_DINCH_4_h_strict_GS4_MM4	31	Cluster 3	B4DY09	vs_LPS	MINCH	5	4h_MINCH_10nM		brown_DINCH_4_h
765	4h_MINCH_10nM_ctrlLPS	0.477953116663847	0.0588574298786103	RFT1	brown	UniprotAccessions-brown_DINCH_4_h_strict_GS4_MM4	11	Cluster 1	B5MDE0	vs_LPS	MINCH	5	4h_MINCH_10nM		brown_DINCH_4_h
766	4h_MINCH_10nM_ctrlLPS	0.127585457143333	0.471418452599304	PAIP1	brown	UniprotAccessions-brown_DINCH_4_h_strict_GS4_MM4	16	Cluster 3	D6REB4	vs_LPS	MINCH	5	4h_MINCH_10nM		brown_DINCH_4_h
767	4h_MINCH_10nM_ctrlLPS	0.253556852352995	0.236826974864523	DENND3	brown	UniprotAccessions-brown_DINCH_4_h_strict_GS4_MM4	17	Cluster 2	E9PF32	vs_LPS	MINCH	5	4h_MINCH_10nM		brown_DINCH_4_h
768	4h_MINCH_10nM_ctrlLPS	0.315252780003618	0.302620957779864	TYK2	brown	UniprotAccessions-brown_DINCH_4_h_strict_GS4_MM4	24	Cluster 1	E9PM19	vs_LPS	MINCH	5	4h_MINCH_10nM		brown_DINCH_4_h
769	4h_MINCH_10nM_ctrlLPS	0.0896841086769269	0.301602146948764	RTCA	brown	UniprotAccessions-brown_DINCH_4_h_strict_GS4_MM4	5	Cluster 3	O00442	vs_LPS	MINCH	5	4h_MINCH_10nM		brown_DINCH_4_h
770	4h_MINCH_10nM_ctrlLPS	0.0723696011492654	0.684664119947483	ZW10	brown	UniprotAccessions-brown_DINCH_4_h_strict_GS4_MM4	20	Cluster 3	O43264	vs_LPS	MINCH	5	4h_MINCH_10nM		brown_DINCH_4_h
771	4h_MINCH_10nM_ctrlLPS	0.850243069658024	0.00357205696246305	CKMT1A	brown	UniprotAccessions-brown_DINCH_4_h_strict_GS4_MM4	7	Cluster 1	P12532	vs_LPS	MINCH	5	4h_MINCH_10nM	**	brown_DINCH_4_h
772	4h_MINCH_10nM_ctrlLPS	-0.00687164763847595	0.981027750327142	MIF	brown	UniprotAccessions-brown_DINCH_4_h_strict_GS4_MM4	21	Cluster 4	P14174	vs_LPS	MINCH	5	4h_MINCH_10nM		brown_DINCH_4_h
773	4h_MINCH_10nM_ctrlLPS	0.0554960151072159	0.599302314198615	GNPDA1	brown	UniprotAccessions-brown_DINCH_4_h_strict_GS4_MM4	19	Cluster 3	P46926	vs_LPS	MINCH	5	4h_MINCH_10nM		brown_DINCH_4_h
774	4h_MINCH_10nM_ctrlLPS	0.228984477176129	0.0964815943030656	ALDH3A2	brown	UniprotAccessions-brown_DINCH_4_h_strict_GS4_MM4	13	Cluster 2	P51648	vs_LPS	MINCH	5	4h_MINCH_10nM		brown_DINCH_4_h
775	4h_MINCH_10nM_ctrlLPS	0.0801814674506001	0.0645397909874066	SUCLG1	brown	UniprotAccessions-brown_DINCH_4_h_strict_GS4_MM4	8	Cluster 3	P53597	vs_LPS	MINCH	5	4h_MINCH_10nM		brown_DINCH_4_h
776	4h_MINCH_10nM_ctrlLPS	-0.0076945257040942	0.793390730494114	EIF3E	brown	UniprotAccessions-brown_DINCH_4_h_strict_GS4_MM4	28	Cluster 3	P60228	vs_LPS	MINCH	5	4h_MINCH_10nM		brown_DINCH_4_h
777	4h_MINCH_10nM_ctrlLPS	-0.0173204904824119	0.823284141893108	RAC1	brown	UniprotAccessions-brown_DINCH_4_h_strict_GS4_MM4	15	Cluster 3	P63000	vs_LPS	MINCH	5	4h_MINCH_10nM		brown_DINCH_4_h
778	4h_MINCH_10nM_ctrlLPS	-0.0161856340157791	0.867383330658115	RAE1	brown	UniprotAccessions-brown_DINCH_4_h_strict_GS4_MM4	26	Cluster 3	P78406	vs_LPS	MINCH	5	4h_MINCH_10nM		brown_DINCH_4_h
779	4h_MINCH_10nM_ctrlLPS	0.185532681950655	0.0290521357768643	ALDH6A1	brown	UniprotAccessions-brown_DINCH_4_h_strict_GS4_MM4	30	Cluster 3	Q02252	vs_LPS	MINCH	5	4h_MINCH_10nM	*	brown_DINCH_4_h
780	4h_MINCH_10nM_ctrlLPS	0.163082395173225	0.150764276163585	NUP160	brown	UniprotAccessions-brown_DINCH_4_h_strict_GS4_MM4	23	Cluster 3	Q12769	vs_LPS	MINCH	5	4h_MINCH_10nM		brown_DINCH_4_h
781	4h_MINCH_10nM_ctrlLPS	0.39333355852081	0.111419871864141	MAVS	brown	UniprotAccessions-brown_DINCH_4_h_strict_GS4_MM4	25	Cluster 1	Q7Z434	vs_LPS	MINCH	5	4h_MINCH_10nM		brown_DINCH_4_h
782	4h_MINCH_10nM_ctrlLPS	0.218925254540351	0.266758805078037	ITPRIP	brown	UniprotAccessions-brown_DINCH_4_h_strict_GS4_MM4	2	Cluster 2	Q8IWB1	vs_LPS	MINCH	5	4h_MINCH_10nM		brown_DINCH_4_h
783	4h_MINCH_10nM_ctrlLPS	0.0184360909536757	0.745536785695571	TUBB6	brown	UniprotAccessions-brown_DINCH_4_h_strict_GS4_MM4	27	Cluster 3	Q9BUF5	vs_LPS	MINCH	5	4h_MINCH_10nM		brown_DINCH_4_h
784	4h_MINCH_10nM_ctrlLPS	0.0437917917023358	0.761975936007819	BOLA2	brown	UniprotAccessions-brown_DINCH_4_h_strict_GS4_MM4	3	Cluster 2	Q9H3K6	vs_LPS	MINCH	5	4h_MINCH_10nM		brown_DINCH_4_h
785	4h_MINCH_10nM_ctrlLPS	0.272500728821923	0.0807368801787749	RRAGC	brown	UniprotAccessions-brown_DINCH_4_h_strict_GS4_MM4	32	Cluster 2	Q9HB90	vs_LPS	MINCH	5	4h_MINCH_10nM		brown_DINCH_4_h
786	4h_MINCH_10nM_ctrlLPS	0.306335147564101	0.0271590100643805	OSGEP	brown	UniprotAccessions-brown_DINCH_4_h_strict_GS4_MM4	6	Cluster 2	Q9NPF4	vs_LPS	MINCH	5	4h_MINCH_10nM	*	brown_DINCH_4_h
787	4h_MINCH_10nM_ctrlLPS	0.200783254797672	0.203787415980705	BABAM2	brown	UniprotAccessions-brown_DINCH_4_h_strict_GS4_MM4	22	Cluster 2	Q9NXR7	vs_LPS	MINCH	5	4h_MINCH_10nM		brown_DINCH_4_h
788	4h_MINCH_10nM_ctrlLPS	0.420401333969416	0.207749937878487	SWAP70	brown	UniprotAccessions-brown_DINCH_4_h_strict_GS4_MM4	9	Cluster 1	Q9UH65	vs_LPS	MINCH	5	4h_MINCH_10nM		brown_DINCH_4_h
789	4h_MINCH_10nM_ctrlLPS	0.0752807861571012	0.676670099774517	CYB5R1	brown	UniprotAccessions-brown_DINCH_4_h_strict_GS4_MM4	1	Cluster 2	Q9UHQ9	vs_LPS	MINCH	5	4h_MINCH_10nM		brown_DINCH_4_h
790	4h_MINCH_10nM_ctrlLPS	0.133334410606274	0.00650965777371557	FAF1	brown	UniprotAccessions-brown_DINCH_4_h_strict_GS4_MM4	33	Cluster 3	Q9UNN5	vs_LPS	MINCH	5	4h_MINCH_10nM	**	brown_DINCH_4_h
791	4h_MINCH_10nM_ctrlLPS	0.324189499206211	0.20629488223055	TRAPPC4	brown	UniprotAccessions-brown_DINCH_4_h_strict_GS4_MM4	12	Cluster 2	Q9Y296	vs_LPS	MINCH	5	4h_MINCH_10nM		brown_DINCH_4_h
792	4h_MINCH_10nM_ctrlLPS	0.264527015505393	0.107355224496461	WBP11	brown	UniprotAccessions-brown_DINCH_4_h_strict_GS4_MM4	29	Cluster 1	Q9Y2W2	vs_LPS	MINCH	5	4h_MINCH_10nM		brown_DINCH_4_h
727	4h_MINCH_100nM_ctrlLPS	0.456520670052105	0.0893473785946643	APOOL	brown	UniprotAccessions-brown_DINCH_4_h_strict_GS4_MM4	4	Cluster 1	A0A087WUX8	vs_LPS	MINCH	6	4h_MINCH_100nM		brown_DINCH_4_h
728	4h_MINCH_100nM_ctrlLPS	0.154567529262932	0.576805169316017	PVR	brown	UniprotAccessions-brown_DINCH_4_h_strict_GS4_MM4	14	Cluster 2	A0A0A0MSA9	vs_LPS	MINCH	6	4h_MINCH_100nM		brown_DINCH_4_h
729	4h_MINCH_100nM_ctrlLPS	0.0964305684494987	0.663896324132388	BTAF1	brown	UniprotAccessions-brown_DINCH_4_h_strict_GS4_MM4	18	Cluster 2	A0A0A0MTH9	vs_LPS	MINCH	6	4h_MINCH_100nM		brown_DINCH_4_h
730	4h_MINCH_100nM_ctrlLPS	0.0338506317375008	0.68411424251885	NRDC	brown	UniprotAccessions-brown_DINCH_4_h_strict_GS4_MM4	10	Cluster 3	B1AKJ5	vs_LPS	MINCH	6	4h_MINCH_100nM		brown_DINCH_4_h
731	4h_MINCH_100nM_ctrlLPS	-0.0738656022031222	0.389696465999517	ILF2	brown	UniprotAccessions-brown_DINCH_4_h_strict_GS4_MM4	31	Cluster 3	B4DY09	vs_LPS	MINCH	6	4h_MINCH_100nM		brown_DINCH_4_h
732	4h_MINCH_100nM_ctrlLPS	0.403608545822564	0.0612316089768076	RFT1	brown	UniprotAccessions-brown_DINCH_4_h_strict_GS4_MM4	11	Cluster 1	B5MDE0	vs_LPS	MINCH	6	4h_MINCH_100nM		brown_DINCH_4_h
733	4h_MINCH_100nM_ctrlLPS	-0.156363333157321	0.406474706565283	PAIP1	brown	UniprotAccessions-brown_DINCH_4_h_strict_GS4_MM4	16	Cluster 3	D6REB4	vs_LPS	MINCH	6	4h_MINCH_100nM		brown_DINCH_4_h
734	4h_MINCH_100nM_ctrlLPS	0.312404443668393	0.0274010638464423	DENND3	brown	UniprotAccessions-brown_DINCH_4_h_strict_GS4_MM4	17	Cluster 2	E9PF32	vs_LPS	MINCH	6	4h_MINCH_100nM	*	brown_DINCH_4_h
735	4h_MINCH_100nM_ctrlLPS	0.779471492722571	0.0244165510139072	TYK2	brown	UniprotAccessions-brown_DINCH_4_h_strict_GS4_MM4	24	Cluster 1	E9PM19	vs_LPS	MINCH	6	4h_MINCH_100nM	*	brown_DINCH_4_h
736	4h_MINCH_100nM_ctrlLPS	0.109898467985162	0.212768465299219	RTCA	brown	UniprotAccessions-brown_DINCH_4_h_strict_GS4_MM4	5	Cluster 3	O00442	vs_LPS	MINCH	6	4h_MINCH_100nM		brown_DINCH_4_h
737	4h_MINCH_100nM_ctrlLPS	0.0791639643413659	0.370124944231579	ZW10	brown	UniprotAccessions-brown_DINCH_4_h_strict_GS4_MM4	20	Cluster 3	O43264	vs_LPS	MINCH	6	4h_MINCH_100nM		brown_DINCH_4_h
738	4h_MINCH_100nM_ctrlLPS	0.831521079196261	0.0115745540617969	CKMT1A	brown	UniprotAccessions-brown_DINCH_4_h_strict_GS4_MM4	7	Cluster 1	P12532	vs_LPS	MINCH	6	4h_MINCH_100nM	*	brown_DINCH_4_h
739	4h_MINCH_100nM_ctrlLPS	0.0211651984557606	0.927237085638929	MIF	brown	UniprotAccessions-brown_DINCH_4_h_strict_GS4_MM4	21	Cluster 4	P14174	vs_LPS	MINCH	6	4h_MINCH_100nM		brown_DINCH_4_h
740	4h_MINCH_100nM_ctrlLPS	0.0951878579293023	0.406793078916008	GNPDA1	brown	UniprotAccessions-brown_DINCH_4_h_strict_GS4_MM4	19	Cluster 3	P46926	vs_LPS	MINCH	6	4h_MINCH_100nM		brown_DINCH_4_h
741	4h_MINCH_100nM_ctrlLPS	0.330325647916427	0.143356888208157	ALDH3A2	brown	UniprotAccessions-brown_DINCH_4_h_strict_GS4_MM4	13	Cluster 2	P51648	vs_LPS	MINCH	6	4h_MINCH_100nM		brown_DINCH_4_h
742	4h_MINCH_100nM_ctrlLPS	0.0205451943077879	0.809000448462903	SUCLG1	brown	UniprotAccessions-brown_DINCH_4_h_strict_GS4_MM4	8	Cluster 3	P53597	vs_LPS	MINCH	6	4h_MINCH_100nM		brown_DINCH_4_h
743	4h_MINCH_100nM_ctrlLPS	0.0142257202181966	0.787303276022309	EIF3E	brown	UniprotAccessions-brown_DINCH_4_h_strict_GS4_MM4	28	Cluster 3	P60228	vs_LPS	MINCH	6	4h_MINCH_100nM		brown_DINCH_4_h
744	4h_MINCH_100nM_ctrlLPS	0.0609308160098588	0.384865848271981	RAC1	brown	UniprotAccessions-brown_DINCH_4_h_strict_GS4_MM4	15	Cluster 3	P63000	vs_LPS	MINCH	6	4h_MINCH_100nM		brown_DINCH_4_h
745	4h_MINCH_100nM_ctrlLPS	0.00250357279465921	0.98296449366611	RAE1	brown	UniprotAccessions-brown_DINCH_4_h_strict_GS4_MM4	26	Cluster 3	P78406	vs_LPS	MINCH	6	4h_MINCH_100nM		brown_DINCH_4_h
746	4h_MINCH_100nM_ctrlLPS	0.11479265555035	0.380851344170997	ALDH6A1	brown	UniprotAccessions-brown_DINCH_4_h_strict_GS4_MM4	30	Cluster 3	Q02252	vs_LPS	MINCH	6	4h_MINCH_100nM		brown_DINCH_4_h
747	4h_MINCH_100nM_ctrlLPS	0.189062841320428	0.125513964496653	NUP160	brown	UniprotAccessions-brown_DINCH_4_h_strict_GS4_MM4	23	Cluster 3	Q12769	vs_LPS	MINCH	6	4h_MINCH_100nM		brown_DINCH_4_h
748	4h_MINCH_100nM_ctrlLPS	0.569780337890796	0.0710314924540703	MAVS	brown	UniprotAccessions-brown_DINCH_4_h_strict_GS4_MM4	25	Cluster 1	Q7Z434	vs_LPS	MINCH	6	4h_MINCH_100nM		brown_DINCH_4_h
749	4h_MINCH_100nM_ctrlLPS	0.246727412239293	0.346048381735961	ITPRIP	brown	UniprotAccessions-brown_DINCH_4_h_strict_GS4_MM4	2	Cluster 2	Q8IWB1	vs_LPS	MINCH	6	4h_MINCH_100nM		brown_DINCH_4_h
750	4h_MINCH_100nM_ctrlLPS	-0.0220837712227411	0.812718495478912	TUBB6	brown	UniprotAccessions-brown_DINCH_4_h_strict_GS4_MM4	27	Cluster 3	Q9BUF5	vs_LPS	MINCH	6	4h_MINCH_100nM		brown_DINCH_4_h
751	4h_MINCH_100nM_ctrlLPS	0.215164313972248	0.139006073115083	BOLA2	brown	UniprotAccessions-brown_DINCH_4_h_strict_GS4_MM4	3	Cluster 2	Q9H3K6	vs_LPS	MINCH	6	4h_MINCH_100nM		brown_DINCH_4_h
752	4h_MINCH_100nM_ctrlLPS	0.211017133849274	0.16735932284546	RRAGC	brown	UniprotAccessions-brown_DINCH_4_h_strict_GS4_MM4	32	Cluster 2	Q9HB90	vs_LPS	MINCH	6	4h_MINCH_100nM		brown_DINCH_4_h
753	4h_MINCH_100nM_ctrlLPS	0.31826144442948	0.026969017511973	OSGEP	brown	UniprotAccessions-brown_DINCH_4_h_strict_GS4_MM4	6	Cluster 2	Q9NPF4	vs_LPS	MINCH	6	4h_MINCH_100nM	*	brown_DINCH_4_h
754	4h_MINCH_100nM_ctrlLPS	0.357238736329336	0.0241295917570256	BABAM2	brown	UniprotAccessions-brown_DINCH_4_h_strict_GS4_MM4	22	Cluster 2	Q9NXR7	vs_LPS	MINCH	6	4h_MINCH_100nM	*	brown_DINCH_4_h
755	4h_MINCH_100nM_ctrlLPS	0.65251150798286	0.0327923595542733	SWAP70	brown	UniprotAccessions-brown_DINCH_4_h_strict_GS4_MM4	9	Cluster 1	Q9UH65	vs_LPS	MINCH	6	4h_MINCH_100nM	*	brown_DINCH_4_h
756	4h_MINCH_100nM_ctrlLPS	0.202424119093541	0.101148946253314	CYB5R1	brown	UniprotAccessions-brown_DINCH_4_h_strict_GS4_MM4	1	Cluster 2	Q9UHQ9	vs_LPS	MINCH	6	4h_MINCH_100nM		brown_DINCH_4_h
757	4h_MINCH_100nM_ctrlLPS	0.0396372645638287	0.242172007635175	FAF1	brown	UniprotAccessions-brown_DINCH_4_h_strict_GS4_MM4	33	Cluster 3	Q9UNN5	vs_LPS	MINCH	6	4h_MINCH_100nM		brown_DINCH_4_h
758	4h_MINCH_100nM_ctrlLPS	0.243874949851368	0.131580070318541	TRAPPC4	brown	UniprotAccessions-brown_DINCH_4_h_strict_GS4_MM4	12	Cluster 2	Q9Y296	vs_LPS	MINCH	6	4h_MINCH_100nM		brown_DINCH_4_h
759	4h_MINCH_100nM_ctrlLPS	0.758659842639144	0.000491762444164107	WBP11	brown	UniprotAccessions-brown_DINCH_4_h_strict_GS4_MM4	29	Cluster 1	Q9Y2W2	vs_LPS	MINCH	6	4h_MINCH_100nM	***	brown_DINCH_4_h
694	4h_MINCH_1000nM_ctrlLPS	0.660805499815942	0.00990662143104232	APOOL	brown	UniprotAccessions-brown_DINCH_4_h_strict_GS4_MM4	4	Cluster 1	A0A087WUX8	vs_LPS	MINCH	7	4h_MINCH_1000nM	**	brown_DINCH_4_h
695	4h_MINCH_1000nM_ctrlLPS	0.307774103418593	0.44958493463963	PVR	brown	UniprotAccessions-brown_DINCH_4_h_strict_GS4_MM4	14	Cluster 2	A0A0A0MSA9	vs_LPS	MINCH	7	4h_MINCH_1000nM		brown_DINCH_4_h
696	4h_MINCH_1000nM_ctrlLPS	0.464270644279039	0.155395787252528	BTAF1	brown	UniprotAccessions-brown_DINCH_4_h_strict_GS4_MM4	18	Cluster 2	A0A0A0MTH9	vs_LPS	MINCH	7	4h_MINCH_1000nM		brown_DINCH_4_h
697	4h_MINCH_1000nM_ctrlLPS	0.0520131884032683	0.686286982207034	NRDC	brown	UniprotAccessions-brown_DINCH_4_h_strict_GS4_MM4	10	Cluster 3	B1AKJ5	vs_LPS	MINCH	7	4h_MINCH_1000nM		brown_DINCH_4_h
698	4h_MINCH_1000nM_ctrlLPS	-0.0262178202625411	0.812296140585688	ILF2	brown	UniprotAccessions-brown_DINCH_4_h_strict_GS4_MM4	31	Cluster 3	B4DY09	vs_LPS	MINCH	7	4h_MINCH_1000nM		brown_DINCH_4_h
699	4h_MINCH_1000nM_ctrlLPS	0.742251851236703	0.0208417242068259	RFT1	brown	UniprotAccessions-brown_DINCH_4_h_strict_GS4_MM4	11	Cluster 1	B5MDE0	vs_LPS	MINCH	7	4h_MINCH_1000nM	*	brown_DINCH_4_h
700	4h_MINCH_1000nM_ctrlLPS	0.0643652595812614	0.826042387669452	PAIP1	brown	UniprotAccessions-brown_DINCH_4_h_strict_GS4_MM4	16	Cluster 3	D6REB4	vs_LPS	MINCH	7	4h_MINCH_1000nM		brown_DINCH_4_h
701	4h_MINCH_1000nM_ctrlLPS	0.465600592232521	0.0794123509077136	DENND3	brown	UniprotAccessions-brown_DINCH_4_h_strict_GS4_MM4	17	Cluster 2	E9PF32	vs_LPS	MINCH	7	4h_MINCH_1000nM		brown_DINCH_4_h
702	4h_MINCH_1000nM_ctrlLPS	0.614154831732779	0.0761651105435235	TYK2	brown	UniprotAccessions-brown_DINCH_4_h_strict_GS4_MM4	24	Cluster 1	E9PM19	vs_LPS	MINCH	7	4h_MINCH_1000nM		brown_DINCH_4_h
703	4h_MINCH_1000nM_ctrlLPS	0.134332386401102	0.259612104852016	RTCA	brown	UniprotAccessions-brown_DINCH_4_h_strict_GS4_MM4	5	Cluster 3	O00442	vs_LPS	MINCH	7	4h_MINCH_1000nM		brown_DINCH_4_h
704	4h_MINCH_1000nM_ctrlLPS	0.18425240159788	0.117177105263571	ZW10	brown	UniprotAccessions-brown_DINCH_4_h_strict_GS4_MM4	20	Cluster 3	O43264	vs_LPS	MINCH	7	4h_MINCH_1000nM		brown_DINCH_4_h
705	4h_MINCH_1000nM_ctrlLPS	0.874559219075901	0.00646067638963839	CKMT1A	brown	UniprotAccessions-brown_DINCH_4_h_strict_GS4_MM4	7	Cluster 1	P12532	vs_LPS	MINCH	7	4h_MINCH_1000nM	**	brown_DINCH_4_h
706	4h_MINCH_1000nM_ctrlLPS	0.0244745230458455	0.921384741684879	MIF	brown	UniprotAccessions-brown_DINCH_4_h_strict_GS4_MM4	21	Cluster 4	P14174	vs_LPS	MINCH	7	4h_MINCH_1000nM		brown_DINCH_4_h
707	4h_MINCH_1000nM_ctrlLPS	0.0928971683165904	0.476487970176584	GNPDA1	brown	UniprotAccessions-brown_DINCH_4_h_strict_GS4_MM4	19	Cluster 3	P46926	vs_LPS	MINCH	7	4h_MINCH_1000nM		brown_DINCH_4_h
708	4h_MINCH_1000nM_ctrlLPS	0.21334439837019	0.431750929716054	ALDH3A2	brown	UniprotAccessions-brown_DINCH_4_h_strict_GS4_MM4	13	Cluster 2	P51648	vs_LPS	MINCH	7	4h_MINCH_1000nM		brown_DINCH_4_h
709	4h_MINCH_1000nM_ctrlLPS	0.0421792620280091	0.679084155933998	SUCLG1	brown	UniprotAccessions-brown_DINCH_4_h_strict_GS4_MM4	8	Cluster 3	P53597	vs_LPS	MINCH	7	4h_MINCH_1000nM		brown_DINCH_4_h
710	4h_MINCH_1000nM_ctrlLPS	0.0281980782404844	0.361809649653943	EIF3E	brown	UniprotAccessions-brown_DINCH_4_h_strict_GS4_MM4	28	Cluster 3	P60228	vs_LPS	MINCH	7	4h_MINCH_1000nM		brown_DINCH_4_h
711	4h_MINCH_1000nM_ctrlLPS	-0.040970521881168	0.725221990936761	RAC1	brown	UniprotAccessions-brown_DINCH_4_h_strict_GS4_MM4	15	Cluster 3	P63000	vs_LPS	MINCH	7	4h_MINCH_1000nM		brown_DINCH_4_h
712	4h_MINCH_1000nM_ctrlLPS	-0.0728354268079303	0.401800955868912	RAE1	brown	UniprotAccessions-brown_DINCH_4_h_strict_GS4_MM4	26	Cluster 3	P78406	vs_LPS	MINCH	7	4h_MINCH_1000nM		brown_DINCH_4_h
713	4h_MINCH_1000nM_ctrlLPS	-0.0926210335440322	0.582309722457203	ALDH6A1	brown	UniprotAccessions-brown_DINCH_4_h_strict_GS4_MM4	30	Cluster 3	Q02252	vs_LPS	MINCH	7	4h_MINCH_1000nM		brown_DINCH_4_h
714	4h_MINCH_1000nM_ctrlLPS	0.221218796467785	0.223834840914193	NUP160	brown	UniprotAccessions-brown_DINCH_4_h_strict_GS4_MM4	23	Cluster 3	Q12769	vs_LPS	MINCH	7	4h_MINCH_1000nM		brown_DINCH_4_h
715	4h_MINCH_1000nM_ctrlLPS	0.526567693378568	0.156489243077131	MAVS	brown	UniprotAccessions-brown_DINCH_4_h_strict_GS4_MM4	25	Cluster 1	Q7Z434	vs_LPS	MINCH	7	4h_MINCH_1000nM		brown_DINCH_4_h
716	4h_MINCH_1000nM_ctrlLPS	-0.0448076559831997	0.872709004776373	ITPRIP	brown	UniprotAccessions-brown_DINCH_4_h_strict_GS4_MM4	2	Cluster 2	Q8IWB1	vs_LPS	MINCH	7	4h_MINCH_1000nM		brown_DINCH_4_h
717	4h_MINCH_1000nM_ctrlLPS	0.0922754569276981	0.0490296709646174	TUBB6	brown	UniprotAccessions-brown_DINCH_4_h_strict_GS4_MM4	27	Cluster 3	Q9BUF5	vs_LPS	MINCH	7	4h_MINCH_1000nM	*	brown_DINCH_4_h
718	4h_MINCH_1000nM_ctrlLPS	0.382572613678283	0.0126306115977877	BOLA2	brown	UniprotAccessions-brown_DINCH_4_h_strict_GS4_MM4	3	Cluster 2	Q9H3K6	vs_LPS	MINCH	7	4h_MINCH_1000nM	*	brown_DINCH_4_h
719	4h_MINCH_1000nM_ctrlLPS	0.248874532441088	0.277272685447322	RRAGC	brown	UniprotAccessions-brown_DINCH_4_h_strict_GS4_MM4	32	Cluster 2	Q9HB90	vs_LPS	MINCH	7	4h_MINCH_1000nM		brown_DINCH_4_h
720	4h_MINCH_1000nM_ctrlLPS	0.336754408209264	0.139689583382358	OSGEP	brown	UniprotAccessions-brown_DINCH_4_h_strict_GS4_MM4	6	Cluster 2	Q9NPF4	vs_LPS	MINCH	7	4h_MINCH_1000nM		brown_DINCH_4_h
721	4h_MINCH_1000nM_ctrlLPS	0.3801615709361	0.102305800406879	BABAM2	brown	UniprotAccessions-brown_DINCH_4_h_strict_GS4_MM4	22	Cluster 2	Q9NXR7	vs_LPS	MINCH	7	4h_MINCH_1000nM		brown_DINCH_4_h
722	4h_MINCH_1000nM_ctrlLPS	0.88795804644129	0.0609014202578734	SWAP70	brown	UniprotAccessions-brown_DINCH_4_h_strict_GS4_MM4	9	Cluster 1	Q9UH65	vs_LPS	MINCH	7	4h_MINCH_1000nM		brown_DINCH_4_h
723	4h_MINCH_1000nM_ctrlLPS	0.255339623431576	0.0182902199924312	CYB5R1	brown	UniprotAccessions-brown_DINCH_4_h_strict_GS4_MM4	1	Cluster 2	Q9UHQ9	vs_LPS	MINCH	7	4h_MINCH_1000nM	*	brown_DINCH_4_h
724	4h_MINCH_1000nM_ctrlLPS	0.0794725704531138	0.214675665039068	FAF1	brown	UniprotAccessions-brown_DINCH_4_h_strict_GS4_MM4	33	Cluster 3	Q9UNN5	vs_LPS	MINCH	7	4h_MINCH_1000nM		brown_DINCH_4_h
725	4h_MINCH_1000nM_ctrlLPS	0.471006839650222	0.0916797113592527	TRAPPC4	brown	UniprotAccessions-brown_DINCH_4_h_strict_GS4_MM4	12	Cluster 2	Q9Y296	vs_LPS	MINCH	7	4h_MINCH_1000nM		brown_DINCH_4_h
726	4h_MINCH_1000nM_ctrlLPS	0.589437378809337	0.000220254527804488	WBP11	brown	UniprotAccessions-brown_DINCH_4_h_strict_GS4_MM4	29	Cluster 1	Q9Y2W2	vs_LPS	MINCH	7	4h_MINCH_1000nM	***	brown_DINCH_4_h
661	4h_MINCH_10000nM_ctrlLPS	0.746736117079833	0.0213629236704153	APOOL	brown	UniprotAccessions-brown_DINCH_4_h_strict_GS4_MM4	4	Cluster 1	A0A087WUX8	vs_LPS	MINCH	8	4h_MINCH_10000nM	*	brown_DINCH_4_h
662	4h_MINCH_10000nM_ctrlLPS	0.560697693008612	0.0390080371532189	PVR	brown	UniprotAccessions-brown_DINCH_4_h_strict_GS4_MM4	14	Cluster 2	A0A0A0MSA9	vs_LPS	MINCH	8	4h_MINCH_10000nM	*	brown_DINCH_4_h
663	4h_MINCH_10000nM_ctrlLPS	0.35936082802123	0.148548180710493	BTAF1	brown	UniprotAccessions-brown_DINCH_4_h_strict_GS4_MM4	18	Cluster 2	A0A0A0MTH9	vs_LPS	MINCH	8	4h_MINCH_10000nM		brown_DINCH_4_h
664	4h_MINCH_10000nM_ctrlLPS	0.0883813860250918	0.335490448887901	NRDC	brown	UniprotAccessions-brown_DINCH_4_h_strict_GS4_MM4	10	Cluster 3	B1AKJ5	vs_LPS	MINCH	8	4h_MINCH_10000nM		brown_DINCH_4_h
665	4h_MINCH_10000nM_ctrlLPS	0.0204466261595866	0.740939394088534	ILF2	brown	UniprotAccessions-brown_DINCH_4_h_strict_GS4_MM4	31	Cluster 3	B4DY09	vs_LPS	MINCH	8	4h_MINCH_10000nM		brown_DINCH_4_h
666	4h_MINCH_10000nM_ctrlLPS	0.710711005423329	0.00565957216334657	RFT1	brown	UniprotAccessions-brown_DINCH_4_h_strict_GS4_MM4	11	Cluster 1	B5MDE0	vs_LPS	MINCH	8	4h_MINCH_10000nM	**	brown_DINCH_4_h
667	4h_MINCH_10000nM_ctrlLPS	0.1651939984881	0.183379222331559	PAIP1	brown	UniprotAccessions-brown_DINCH_4_h_strict_GS4_MM4	16	Cluster 3	D6REB4	vs_LPS	MINCH	8	4h_MINCH_10000nM		brown_DINCH_4_h
668	4h_MINCH_10000nM_ctrlLPS	0.477196722175268	0.02789082076549	DENND3	brown	UniprotAccessions-brown_DINCH_4_h_strict_GS4_MM4	17	Cluster 2	E9PF32	vs_LPS	MINCH	8	4h_MINCH_10000nM	*	brown_DINCH_4_h
669	4h_MINCH_10000nM_ctrlLPS	0.665119336909211	0.00441031354345537	TYK2	brown	UniprotAccessions-brown_DINCH_4_h_strict_GS4_MM4	24	Cluster 1	E9PM19	vs_LPS	MINCH	8	4h_MINCH_10000nM	**	brown_DINCH_4_h
670	4h_MINCH_10000nM_ctrlLPS	0.135149504824372	0.210080612711524	RTCA	brown	UniprotAccessions-brown_DINCH_4_h_strict_GS4_MM4	5	Cluster 3	O00442	vs_LPS	MINCH	8	4h_MINCH_10000nM		brown_DINCH_4_h
671	4h_MINCH_10000nM_ctrlLPS	0.178517499314625	0.0971306922655631	ZW10	brown	UniprotAccessions-brown_DINCH_4_h_strict_GS4_MM4	20	Cluster 3	O43264	vs_LPS	MINCH	8	4h_MINCH_10000nM		brown_DINCH_4_h
672	4h_MINCH_10000nM_ctrlLPS	0.758880977500504	0.0311016205307898	CKMT1A	brown	UniprotAccessions-brown_DINCH_4_h_strict_GS4_MM4	7	Cluster 1	P12532	vs_LPS	MINCH	8	4h_MINCH_10000nM	*	brown_DINCH_4_h
673	4h_MINCH_10000nM_ctrlLPS	0.30606598954867	0.360218822188496	MIF	brown	UniprotAccessions-brown_DINCH_4_h_strict_GS4_MM4	21	Cluster 4	P14174	vs_LPS	MINCH	8	4h_MINCH_10000nM		brown_DINCH_4_h
674	4h_MINCH_10000nM_ctrlLPS	0.152835700735812	0.21490058726778	GNPDA1	brown	UniprotAccessions-brown_DINCH_4_h_strict_GS4_MM4	19	Cluster 3	P46926	vs_LPS	MINCH	8	4h_MINCH_10000nM		brown_DINCH_4_h
675	4h_MINCH_10000nM_ctrlLPS	0.289200250027627	0.231778261560407	ALDH3A2	brown	UniprotAccessions-brown_DINCH_4_h_strict_GS4_MM4	13	Cluster 2	P51648	vs_LPS	MINCH	8	4h_MINCH_10000nM		brown_DINCH_4_h
676	4h_MINCH_10000nM_ctrlLPS	0.0251332994520823	0.754921142137004	SUCLG1	brown	UniprotAccessions-brown_DINCH_4_h_strict_GS4_MM4	8	Cluster 3	P53597	vs_LPS	MINCH	8	4h_MINCH_10000nM		brown_DINCH_4_h
677	4h_MINCH_10000nM_ctrlLPS	0.0582955257103365	0.19974198318915	EIF3E	brown	UniprotAccessions-brown_DINCH_4_h_strict_GS4_MM4	28	Cluster 3	P60228	vs_LPS	MINCH	8	4h_MINCH_10000nM		brown_DINCH_4_h
678	4h_MINCH_10000nM_ctrlLPS	0.120299993735874	0.25910985213242	RAC1	brown	UniprotAccessions-brown_DINCH_4_h_strict_GS4_MM4	15	Cluster 3	P63000	vs_LPS	MINCH	8	4h_MINCH_10000nM		brown_DINCH_4_h
679	4h_MINCH_10000nM_ctrlLPS	-0.000413608806530921	0.995706767778262	RAE1	brown	UniprotAccessions-brown_DINCH_4_h_strict_GS4_MM4	26	Cluster 3	P78406	vs_LPS	MINCH	8	4h_MINCH_10000nM		brown_DINCH_4_h
680	4h_MINCH_10000nM_ctrlLPS	0.0178683239469312	0.895673982327833	ALDH6A1	brown	UniprotAccessions-brown_DINCH_4_h_strict_GS4_MM4	30	Cluster 3	Q02252	vs_LPS	MINCH	8	4h_MINCH_10000nM		brown_DINCH_4_h
681	4h_MINCH_10000nM_ctrlLPS	0.167531662456284	0.189373922914679	NUP160	brown	UniprotAccessions-brown_DINCH_4_h_strict_GS4_MM4	23	Cluster 3	Q12769	vs_LPS	MINCH	8	4h_MINCH_10000nM		brown_DINCH_4_h
682	4h_MINCH_10000nM_ctrlLPS	0.534627532515425	0.088042655252599	MAVS	brown	UniprotAccessions-brown_DINCH_4_h_strict_GS4_MM4	25	Cluster 1	Q7Z434	vs_LPS	MINCH	8	4h_MINCH_10000nM		brown_DINCH_4_h
683	4h_MINCH_10000nM_ctrlLPS	0.305385185746317	0.106716536108555	ITPRIP	brown	UniprotAccessions-brown_DINCH_4_h_strict_GS4_MM4	2	Cluster 2	Q8IWB1	vs_LPS	MINCH	8	4h_MINCH_10000nM		brown_DINCH_4_h
684	4h_MINCH_10000nM_ctrlLPS	0.106431565667868	0.115916847836049	TUBB6	brown	UniprotAccessions-brown_DINCH_4_h_strict_GS4_MM4	27	Cluster 3	Q9BUF5	vs_LPS	MINCH	8	4h_MINCH_10000nM		brown_DINCH_4_h
685	4h_MINCH_10000nM_ctrlLPS	0.440378386103204	0.0183911729690268	BOLA2	brown	UniprotAccessions-brown_DINCH_4_h_strict_GS4_MM4	3	Cluster 2	Q9H3K6	vs_LPS	MINCH	8	4h_MINCH_10000nM	*	brown_DINCH_4_h
686	4h_MINCH_10000nM_ctrlLPS	0.264971859775294	0.0647784205675507	RRAGC	brown	UniprotAccessions-brown_DINCH_4_h_strict_GS4_MM4	32	Cluster 2	Q9HB90	vs_LPS	MINCH	8	4h_MINCH_10000nM		brown_DINCH_4_h
687	4h_MINCH_10000nM_ctrlLPS	0.504308234012943	0.0547741556100039	OSGEP	brown	UniprotAccessions-brown_DINCH_4_h_strict_GS4_MM4	6	Cluster 2	Q9NPF4	vs_LPS	MINCH	8	4h_MINCH_10000nM		brown_DINCH_4_h
688	4h_MINCH_10000nM_ctrlLPS	0.403148289322773	0.0229537457850872	BABAM2	brown	UniprotAccessions-brown_DINCH_4_h_strict_GS4_MM4	22	Cluster 2	Q9NXR7	vs_LPS	MINCH	8	4h_MINCH_10000nM	*	brown_DINCH_4_h
689	4h_MINCH_10000nM_ctrlLPS	0.812450849009485	0.0560616669734621	SWAP70	brown	UniprotAccessions-brown_DINCH_4_h_strict_GS4_MM4	9	Cluster 1	Q9UH65	vs_LPS	MINCH	8	4h_MINCH_10000nM		brown_DINCH_4_h
690	4h_MINCH_10000nM_ctrlLPS	0.293381080722929	0.0234160120986969	CYB5R1	brown	UniprotAccessions-brown_DINCH_4_h_strict_GS4_MM4	1	Cluster 2	Q9UHQ9	vs_LPS	MINCH	8	4h_MINCH_10000nM	*	brown_DINCH_4_h
691	4h_MINCH_10000nM_ctrlLPS	0.129255435985154	0.00832116709727392	FAF1	brown	UniprotAccessions-brown_DINCH_4_h_strict_GS4_MM4	33	Cluster 3	Q9UNN5	vs_LPS	MINCH	8	4h_MINCH_10000nM	**	brown_DINCH_4_h
692	4h_MINCH_10000nM_ctrlLPS	0.445785486838437	0.010508870918907	TRAPPC4	brown	UniprotAccessions-brown_DINCH_4_h_strict_GS4_MM4	12	Cluster 2	Q9Y296	vs_LPS	MINCH	8	4h_MINCH_10000nM	*	brown_DINCH_4_h
693	4h_MINCH_10000nM_ctrlLPS	0.649642953115597	0.0150973532616846	WBP11	brown	UniprotAccessions-brown_DINCH_4_h_strict_GS4_MM4	29	Cluster 1	Q9Y2W2	vs_LPS	MINCH	8	4h_MINCH_10000nM	*	brown_DINCH_4_h
10012	16h_DINCH_10nM_ctrlLPS	0.132089393087321	0.0801861944642498	APOOL	brown	UniprotAccessions-brown_DINCH_4_h_strict_GS4_MM4	4	Cluster 1	A0A087WUX8	vs_LPS	DINCH	9	16h_DINCH_10nM		brown_DINCH_4_h
10112	16h_DINCH_10nM_ctrlLPS	0.146173885977452	0.00151621170996264	PVR	brown	UniprotAccessions-brown_DINCH_4_h_strict_GS4_MM4	14	Cluster 2	A0A0A0MSA9	vs_LPS	DINCH	9	16h_DINCH_10nM	**	brown_DINCH_4_h
10212	16h_DINCH_10nM_ctrlLPS	NA	NA	BTAF1	brown	UniprotAccessions-brown_DINCH_4_h_strict_GS4_MM4	18	Cluster 2	A0A0A0MTH9	vs_LPS	DINCH	9	16h_DINCH_10nM		brown_DINCH_4_h
10312	16h_DINCH_10nM_ctrlLPS	-0.0241319568014213	0.461757606981448	NRDC	brown	UniprotAccessions-brown_DINCH_4_h_strict_GS4_MM4	10	Cluster 3	B1AKJ5	vs_LPS	DINCH	9	16h_DINCH_10nM		brown_DINCH_4_h
10412	16h_DINCH_10nM_ctrlLPS	0.000497730559979051	0.94121593681242	ILF2	brown	UniprotAccessions-brown_DINCH_4_h_strict_GS4_MM4	31	Cluster 3	B4DY09	vs_LPS	DINCH	9	16h_DINCH_10nM		brown_DINCH_4_h
10512	16h_DINCH_10nM_ctrlLPS	-0.0312342713878549	0.542895695514238	RFT1	brown	UniprotAccessions-brown_DINCH_4_h_strict_GS4_MM4	11	Cluster 1	B5MDE0	vs_LPS	DINCH	9	16h_DINCH_10nM		brown_DINCH_4_h
10612	16h_DINCH_10nM_ctrlLPS	-0.0372511166079893	0.747599154777075	PAIP1	brown	UniprotAccessions-brown_DINCH_4_h_strict_GS4_MM4	16	Cluster 3	D6REB4	vs_LPS	DINCH	9	16h_DINCH_10nM		brown_DINCH_4_h
10712	16h_DINCH_10nM_ctrlLPS	-0.0471283838027296	0.414190395999043	DENND3	brown	UniprotAccessions-brown_DINCH_4_h_strict_GS4_MM4	17	Cluster 2	E9PF32	vs_LPS	DINCH	9	16h_DINCH_10nM		brown_DINCH_4_h
10812	16h_DINCH_10nM_ctrlLPS	-0.118406830922405	0.291374721369131	TYK2	brown	UniprotAccessions-brown_DINCH_4_h_strict_GS4_MM4	24	Cluster 1	E9PM19	vs_LPS	DINCH	9	16h_DINCH_10nM		brown_DINCH_4_h
10912	16h_DINCH_10nM_ctrlLPS	-0.0321589981632803	0.0223465446866282	RTCA	brown	UniprotAccessions-brown_DINCH_4_h_strict_GS4_MM4	5	Cluster 3	O00442	vs_LPS	DINCH	9	16h_DINCH_10nM	*	brown_DINCH_4_h
11012	16h_DINCH_10nM_ctrlLPS	0.00199179025586297	0.928358839849581	ZW10	brown	UniprotAccessions-brown_DINCH_4_h_strict_GS4_MM4	20	Cluster 3	O43264	vs_LPS	DINCH	9	16h_DINCH_10nM		brown_DINCH_4_h
11112	16h_DINCH_10nM_ctrlLPS	0.18978204525983	0.0215710490038944	CKMT1A	brown	UniprotAccessions-brown_DINCH_4_h_strict_GS4_MM4	7	Cluster 1	P12532	vs_LPS	DINCH	9	16h_DINCH_10nM	*	brown_DINCH_4_h
11212	16h_DINCH_10nM_ctrlLPS	-0.472173844724113	0.00340689439924155	MIF	brown	UniprotAccessions-brown_DINCH_4_h_strict_GS4_MM4	21	Cluster 4	P14174	vs_LPS	DINCH	9	16h_DINCH_10nM	**	brown_DINCH_4_h
11312	16h_DINCH_10nM_ctrlLPS	0.0185087730246938	0.593715342726667	GNPDA1	brown	UniprotAccessions-brown_DINCH_4_h_strict_GS4_MM4	19	Cluster 3	P46926	vs_LPS	DINCH	9	16h_DINCH_10nM		brown_DINCH_4_h
11412	16h_DINCH_10nM_ctrlLPS	0.0889267066447148	0.0202842636880791	ALDH3A2	brown	UniprotAccessions-brown_DINCH_4_h_strict_GS4_MM4	13	Cluster 2	P51648	vs_LPS	DINCH	9	16h_DINCH_10nM	*	brown_DINCH_4_h
11512	16h_DINCH_10nM_ctrlLPS	-0.0194020695081372	0.670952339594028	SUCLG1	brown	UniprotAccessions-brown_DINCH_4_h_strict_GS4_MM4	8	Cluster 3	P53597	vs_LPS	DINCH	9	16h_DINCH_10nM		brown_DINCH_4_h
11612	16h_DINCH_10nM_ctrlLPS	0.00650810250277793	0.640458007373315	EIF3E	brown	UniprotAccessions-brown_DINCH_4_h_strict_GS4_MM4	28	Cluster 3	P60228	vs_LPS	DINCH	9	16h_DINCH_10nM		brown_DINCH_4_h
11712	16h_DINCH_10nM_ctrlLPS	-0.108779483131511	0.112126216856577	RAC1	brown	UniprotAccessions-brown_DINCH_4_h_strict_GS4_MM4	15	Cluster 3	P63000	vs_LPS	DINCH	9	16h_DINCH_10nM		brown_DINCH_4_h
11812	16h_DINCH_10nM_ctrlLPS	-0.0734435745613154	0.0576658977716854	RAE1	brown	UniprotAccessions-brown_DINCH_4_h_strict_GS4_MM4	26	Cluster 3	P78406	vs_LPS	DINCH	9	16h_DINCH_10nM		brown_DINCH_4_h
11912	16h_DINCH_10nM_ctrlLPS	-0.025136407606306	0.755250130470009	ALDH6A1	brown	UniprotAccessions-brown_DINCH_4_h_strict_GS4_MM4	30	Cluster 3	Q02252	vs_LPS	DINCH	9	16h_DINCH_10nM		brown_DINCH_4_h
12012	16h_DINCH_10nM_ctrlLPS	-0.0366125611052383	0.693577077363754	NUP160	brown	UniprotAccessions-brown_DINCH_4_h_strict_GS4_MM4	23	Cluster 3	Q12769	vs_LPS	DINCH	9	16h_DINCH_10nM		brown_DINCH_4_h
12112	16h_DINCH_10nM_ctrlLPS	NA	NA	MAVS	brown	UniprotAccessions-brown_DINCH_4_h_strict_GS4_MM4	25	Cluster 1	Q7Z434	vs_LPS	DINCH	9	16h_DINCH_10nM		brown_DINCH_4_h
12212	16h_DINCH_10nM_ctrlLPS	0.0212068402841238	0.809091384680498	ITPRIP	brown	UniprotAccessions-brown_DINCH_4_h_strict_GS4_MM4	2	Cluster 2	Q8IWB1	vs_LPS	DINCH	9	16h_DINCH_10nM		brown_DINCH_4_h
12312	16h_DINCH_10nM_ctrlLPS	-0.0246704330979668	0.332202440541072	TUBB6	brown	UniprotAccessions-brown_DINCH_4_h_strict_GS4_MM4	27	Cluster 3	Q9BUF5	vs_LPS	DINCH	9	16h_DINCH_10nM		brown_DINCH_4_h
12412	16h_DINCH_10nM_ctrlLPS	-0.199894113891786	0.00252017609395675	BOLA2	brown	UniprotAccessions-brown_DINCH_4_h_strict_GS4_MM4	3	Cluster 2	Q9H3K6	vs_LPS	DINCH	9	16h_DINCH_10nM	**	brown_DINCH_4_h
12512	16h_DINCH_10nM_ctrlLPS	-0.0468383049772334	0.412742243945139	RRAGC	brown	UniprotAccessions-brown_DINCH_4_h_strict_GS4_MM4	32	Cluster 2	Q9HB90	vs_LPS	DINCH	9	16h_DINCH_10nM		brown_DINCH_4_h
12612	16h_DINCH_10nM_ctrlLPS	-0.0732539559083349	0.429325973187444	OSGEP	brown	UniprotAccessions-brown_DINCH_4_h_strict_GS4_MM4	6	Cluster 2	Q9NPF4	vs_LPS	DINCH	9	16h_DINCH_10nM		brown_DINCH_4_h
12712	16h_DINCH_10nM_ctrlLPS	0.00650063746618833	0.859046161959563	BABAM2	brown	UniprotAccessions-brown_DINCH_4_h_strict_GS4_MM4	22	Cluster 2	Q9NXR7	vs_LPS	DINCH	9	16h_DINCH_10nM		brown_DINCH_4_h
12812	16h_DINCH_10nM_ctrlLPS	0.090917820404445	0.167618856325805	SWAP70	brown	UniprotAccessions-brown_DINCH_4_h_strict_GS4_MM4	9	Cluster 1	Q9UH65	vs_LPS	DINCH	9	16h_DINCH_10nM		brown_DINCH_4_h
12912	16h_DINCH_10nM_ctrlLPS	-0.0532465560422811	0.247797027300878	CYB5R1	brown	UniprotAccessions-brown_DINCH_4_h_strict_GS4_MM4	1	Cluster 2	Q9UHQ9	vs_LPS	DINCH	9	16h_DINCH_10nM		brown_DINCH_4_h
13012	16h_DINCH_10nM_ctrlLPS	-0.044007664138414	0.0939759173352527	FAF1	brown	UniprotAccessions-brown_DINCH_4_h_strict_GS4_MM4	33	Cluster 3	Q9UNN5	vs_LPS	DINCH	9	16h_DINCH_10nM		brown_DINCH_4_h
13112	16h_DINCH_10nM_ctrlLPS	-0.00957090390776322	0.765316309360069	TRAPPC4	brown	UniprotAccessions-brown_DINCH_4_h_strict_GS4_MM4	12	Cluster 2	Q9Y296	vs_LPS	DINCH	9	16h_DINCH_10nM		brown_DINCH_4_h
13212	16h_DINCH_10nM_ctrlLPS	-0.00679755574669229	0.82466605145532	WBP11	brown	UniprotAccessions-brown_DINCH_4_h_strict_GS4_MM4	29	Cluster 1	Q9Y2W2	vs_LPS	DINCH	9	16h_DINCH_10nM		brown_DINCH_4_h
6716	16h_DINCH_100nM_ctrlLPS	0.164129375913055	2.78481535056075e-05	APOOL	brown	UniprotAccessions-brown_DINCH_4_h_strict_GS4_MM4	4	Cluster 1	A0A087WUX8	vs_LPS	DINCH	10	16h_DINCH_100nM	***	brown_DINCH_4_h
6816	16h_DINCH_100nM_ctrlLPS	0.0275375145675709	0.572402892279406	PVR	brown	UniprotAccessions-brown_DINCH_4_h_strict_GS4_MM4	14	Cluster 2	A0A0A0MSA9	vs_LPS	DINCH	10	16h_DINCH_100nM		brown_DINCH_4_h
6916	16h_DINCH_100nM_ctrlLPS	NA	NA	BTAF1	brown	UniprotAccessions-brown_DINCH_4_h_strict_GS4_MM4	18	Cluster 2	A0A0A0MTH9	vs_LPS	DINCH	10	16h_DINCH_100nM		brown_DINCH_4_h
7016	16h_DINCH_100nM_ctrlLPS	0.00885518203731948	0.732646149449276	NRDC	brown	UniprotAccessions-brown_DINCH_4_h_strict_GS4_MM4	10	Cluster 3	B1AKJ5	vs_LPS	DINCH	10	16h_DINCH_100nM		brown_DINCH_4_h
7116	16h_DINCH_100nM_ctrlLPS	0.00350006627882112	0.808351841677735	ILF2	brown	UniprotAccessions-brown_DINCH_4_h_strict_GS4_MM4	31	Cluster 3	B4DY09	vs_LPS	DINCH	10	16h_DINCH_100nM		brown_DINCH_4_h
7216	16h_DINCH_100nM_ctrlLPS	0.0226839581075892	0.518906556135994	RFT1	brown	UniprotAccessions-brown_DINCH_4_h_strict_GS4_MM4	11	Cluster 1	B5MDE0	vs_LPS	DINCH	10	16h_DINCH_100nM		brown_DINCH_4_h
7312	16h_DINCH_100nM_ctrlLPS	-0.00499909107085245	0.96238669921777	PAIP1	brown	UniprotAccessions-brown_DINCH_4_h_strict_GS4_MM4	16	Cluster 3	D6REB4	vs_LPS	DINCH	10	16h_DINCH_100nM		brown_DINCH_4_h
7412	16h_DINCH_100nM_ctrlLPS	-0.026438123263673	0.631079876021797	DENND3	brown	UniprotAccessions-brown_DINCH_4_h_strict_GS4_MM4	17	Cluster 2	E9PF32	vs_LPS	DINCH	10	16h_DINCH_100nM		brown_DINCH_4_h
7512	16h_DINCH_100nM_ctrlLPS	-0.340508090254717	0.0611573950731158	TYK2	brown	UniprotAccessions-brown_DINCH_4_h_strict_GS4_MM4	24	Cluster 1	E9PM19	vs_LPS	DINCH	10	16h_DINCH_100nM		brown_DINCH_4_h
7612	16h_DINCH_100nM_ctrlLPS	0.00650247449565508	0.74924872782581	RTCA	brown	UniprotAccessions-brown_DINCH_4_h_strict_GS4_MM4	5	Cluster 3	O00442	vs_LPS	DINCH	10	16h_DINCH_100nM		brown_DINCH_4_h
7712	16h_DINCH_100nM_ctrlLPS	-0.0428892191794946	0.494190453265207	ZW10	brown	UniprotAccessions-brown_DINCH_4_h_strict_GS4_MM4	20	Cluster 3	O43264	vs_LPS	DINCH	10	16h_DINCH_100nM		brown_DINCH_4_h
7812	16h_DINCH_100nM_ctrlLPS	0.127527828412536	0.338717025066945	CKMT1A	brown	UniprotAccessions-brown_DINCH_4_h_strict_GS4_MM4	7	Cluster 1	P12532	vs_LPS	DINCH	10	16h_DINCH_100nM		brown_DINCH_4_h
7912	16h_DINCH_100nM_ctrlLPS	-0.008145115147184	0.934110544028783	MIF	brown	UniprotAccessions-brown_DINCH_4_h_strict_GS4_MM4	21	Cluster 4	P14174	vs_LPS	DINCH	10	16h_DINCH_100nM		brown_DINCH_4_h
8012	16h_DINCH_100nM_ctrlLPS	-0.00776969467473212	0.705722913852291	GNPDA1	brown	UniprotAccessions-brown_DINCH_4_h_strict_GS4_MM4	19	Cluster 3	P46926	vs_LPS	DINCH	10	16h_DINCH_100nM		brown_DINCH_4_h
8112	16h_DINCH_100nM_ctrlLPS	-0.113914274932791	0.256738167886242	ALDH3A2	brown	UniprotAccessions-brown_DINCH_4_h_strict_GS4_MM4	13	Cluster 2	P51648	vs_LPS	DINCH	10	16h_DINCH_100nM		brown_DINCH_4_h
8212	16h_DINCH_100nM_ctrlLPS	-0.0139812711656468	0.747598496866307	SUCLG1	brown	UniprotAccessions-brown_DINCH_4_h_strict_GS4_MM4	8	Cluster 3	P53597	vs_LPS	DINCH	10	16h_DINCH_100nM		brown_DINCH_4_h
8312	16h_DINCH_100nM_ctrlLPS	0.00647498405998397	0.638615840811374	EIF3E	brown	UniprotAccessions-brown_DINCH_4_h_strict_GS4_MM4	28	Cluster 3	P60228	vs_LPS	DINCH	10	16h_DINCH_100nM		brown_DINCH_4_h
8412	16h_DINCH_100nM_ctrlLPS	-0.089072286349729	0.0436425082558615	RAC1	brown	UniprotAccessions-brown_DINCH_4_h_strict_GS4_MM4	15	Cluster 3	P63000	vs_LPS	DINCH	10	16h_DINCH_100nM	*	brown_DINCH_4_h
8512	16h_DINCH_100nM_ctrlLPS	-0.0308440653293362	0.437839919703574	RAE1	brown	UniprotAccessions-brown_DINCH_4_h_strict_GS4_MM4	26	Cluster 3	P78406	vs_LPS	DINCH	10	16h_DINCH_100nM		brown_DINCH_4_h
8612	16h_DINCH_100nM_ctrlLPS	0.109617375571156	0.000347645262937775	ALDH6A1	brown	UniprotAccessions-brown_DINCH_4_h_strict_GS4_MM4	30	Cluster 3	Q02252	vs_LPS	DINCH	10	16h_DINCH_100nM	***	brown_DINCH_4_h
8712	16h_DINCH_100nM_ctrlLPS	-0.09342659317917	0.19219525658044	NUP160	brown	UniprotAccessions-brown_DINCH_4_h_strict_GS4_MM4	23	Cluster 3	Q12769	vs_LPS	DINCH	10	16h_DINCH_100nM		brown_DINCH_4_h
8812	16h_DINCH_100nM_ctrlLPS	NA	NA	MAVS	brown	UniprotAccessions-brown_DINCH_4_h_strict_GS4_MM4	25	Cluster 1	Q7Z434	vs_LPS	DINCH	10	16h_DINCH_100nM		brown_DINCH_4_h
8912	16h_DINCH_100nM_ctrlLPS	-0.0499985335743453	0.552785370648576	ITPRIP	brown	UniprotAccessions-brown_DINCH_4_h_strict_GS4_MM4	2	Cluster 2	Q8IWB1	vs_LPS	DINCH	10	16h_DINCH_100nM		brown_DINCH_4_h
9012	16h_DINCH_100nM_ctrlLPS	-0.0273520631869585	0.283375685770516	TUBB6	brown	UniprotAccessions-brown_DINCH_4_h_strict_GS4_MM4	27	Cluster 3	Q9BUF5	vs_LPS	DINCH	10	16h_DINCH_100nM		brown_DINCH_4_h
9112	16h_DINCH_100nM_ctrlLPS	-0.0694358762371306	0.510369481213413	BOLA2	brown	UniprotAccessions-brown_DINCH_4_h_strict_GS4_MM4	3	Cluster 2	Q9H3K6	vs_LPS	DINCH	10	16h_DINCH_100nM		brown_DINCH_4_h
9212	16h_DINCH_100nM_ctrlLPS	0.0555359312103352	0.101454117232571	RRAGC	brown	UniprotAccessions-brown_DINCH_4_h_strict_GS4_MM4	32	Cluster 2	Q9HB90	vs_LPS	DINCH	10	16h_DINCH_100nM		brown_DINCH_4_h
9312	16h_DINCH_100nM_ctrlLPS	0.0581218551810248	0.201861018246032	OSGEP	brown	UniprotAccessions-brown_DINCH_4_h_strict_GS4_MM4	6	Cluster 2	Q9NPF4	vs_LPS	DINCH	10	16h_DINCH_100nM		brown_DINCH_4_h
9412	16h_DINCH_100nM_ctrlLPS	0.0842458159696082	0.107497733194989	BABAM2	brown	UniprotAccessions-brown_DINCH_4_h_strict_GS4_MM4	22	Cluster 2	Q9NXR7	vs_LPS	DINCH	10	16h_DINCH_100nM		brown_DINCH_4_h
9512	16h_DINCH_100nM_ctrlLPS	0.106919668852483	0.000357549597786227	SWAP70	brown	UniprotAccessions-brown_DINCH_4_h_strict_GS4_MM4	9	Cluster 1	Q9UH65	vs_LPS	DINCH	10	16h_DINCH_100nM	***	brown_DINCH_4_h
9612	16h_DINCH_100nM_ctrlLPS	-0.0131140090756785	0.648473346596586	CYB5R1	brown	UniprotAccessions-brown_DINCH_4_h_strict_GS4_MM4	1	Cluster 2	Q9UHQ9	vs_LPS	DINCH	10	16h_DINCH_100nM		brown_DINCH_4_h
9712	16h_DINCH_100nM_ctrlLPS	0.00386870576970966	0.907792707077032	FAF1	brown	UniprotAccessions-brown_DINCH_4_h_strict_GS4_MM4	33	Cluster 3	Q9UNN5	vs_LPS	DINCH	10	16h_DINCH_100nM		brown_DINCH_4_h
9812	16h_DINCH_100nM_ctrlLPS	0.00371056916449673	0.865514788969101	TRAPPC4	brown	UniprotAccessions-brown_DINCH_4_h_strict_GS4_MM4	12	Cluster 2	Q9Y296	vs_LPS	DINCH	10	16h_DINCH_100nM		brown_DINCH_4_h
9912	16h_DINCH_100nM_ctrlLPS	0.0997237031964202	0.43813118375075	WBP11	brown	UniprotAccessions-brown_DINCH_4_h_strict_GS4_MM4	29	Cluster 1	Q9Y2W2	vs_LPS	DINCH	10	16h_DINCH_100nM		brown_DINCH_4_h
3416	16h_DINCH_1000nM_ctrlLPS	0.0481019668251648	0.457981774914426	APOOL	brown	UniprotAccessions-brown_DINCH_4_h_strict_GS4_MM4	4	Cluster 1	A0A087WUX8	vs_LPS	DINCH	11	16h_DINCH_1000nM		brown_DINCH_4_h
3516	16h_DINCH_1000nM_ctrlLPS	0.0725148064144137	0.347575504133279	PVR	brown	UniprotAccessions-brown_DINCH_4_h_strict_GS4_MM4	14	Cluster 2	A0A0A0MSA9	vs_LPS	DINCH	11	16h_DINCH_1000nM		brown_DINCH_4_h
3616	16h_DINCH_1000nM_ctrlLPS	NA	NA	BTAF1	brown	UniprotAccessions-brown_DINCH_4_h_strict_GS4_MM4	18	Cluster 2	A0A0A0MTH9	vs_LPS	DINCH	11	16h_DINCH_1000nM		brown_DINCH_4_h
3716	16h_DINCH_1000nM_ctrlLPS	-0.0406677113902576	0.0228055616036039	NRDC	brown	UniprotAccessions-brown_DINCH_4_h_strict_GS4_MM4	10	Cluster 3	B1AKJ5	vs_LPS	DINCH	11	16h_DINCH_1000nM	*	brown_DINCH_4_h
3816	16h_DINCH_1000nM_ctrlLPS	-0.0831168804336541	0.00514636806334468	ILF2	brown	UniprotAccessions-brown_DINCH_4_h_strict_GS4_MM4	31	Cluster 3	B4DY09	vs_LPS	DINCH	11	16h_DINCH_1000nM	**	brown_DINCH_4_h
3916	16h_DINCH_1000nM_ctrlLPS	-0.0630836094479532	0.0210334544043103	RFT1	brown	UniprotAccessions-brown_DINCH_4_h_strict_GS4_MM4	11	Cluster 1	B5MDE0	vs_LPS	DINCH	11	16h_DINCH_1000nM	*	brown_DINCH_4_h
4016	16h_DINCH_1000nM_ctrlLPS	0.0489753499190978	0.691203016976998	PAIP1	brown	UniprotAccessions-brown_DINCH_4_h_strict_GS4_MM4	16	Cluster 3	D6REB4	vs_LPS	DINCH	11	16h_DINCH_1000nM		brown_DINCH_4_h
4116	16h_DINCH_1000nM_ctrlLPS	-0.0153714001705377	0.8136573190353	DENND3	brown	UniprotAccessions-brown_DINCH_4_h_strict_GS4_MM4	17	Cluster 2	E9PF32	vs_LPS	DINCH	11	16h_DINCH_1000nM		brown_DINCH_4_h
4216	16h_DINCH_1000nM_ctrlLPS	-0.223940483732098	0.141506805269555	TYK2	brown	UniprotAccessions-brown_DINCH_4_h_strict_GS4_MM4	24	Cluster 1	E9PM19	vs_LPS	DINCH	11	16h_DINCH_1000nM		brown_DINCH_4_h
4316	16h_DINCH_1000nM_ctrlLPS	0.0145416766132113	0.477098487270942	RTCA	brown	UniprotAccessions-brown_DINCH_4_h_strict_GS4_MM4	5	Cluster 3	O00442	vs_LPS	DINCH	11	16h_DINCH_1000nM		brown_DINCH_4_h
4416	16h_DINCH_1000nM_ctrlLPS	0.0128290311162226	0.822536004290386	ZW10	brown	UniprotAccessions-brown_DINCH_4_h_strict_GS4_MM4	20	Cluster 3	O43264	vs_LPS	DINCH	11	16h_DINCH_1000nM		brown_DINCH_4_h
4516	16h_DINCH_1000nM_ctrlLPS	0.0885241406290184	0.0709069191058297	CKMT1A	brown	UniprotAccessions-brown_DINCH_4_h_strict_GS4_MM4	7	Cluster 1	P12532	vs_LPS	DINCH	11	16h_DINCH_1000nM		brown_DINCH_4_h
4616	16h_DINCH_1000nM_ctrlLPS	-0.269854531243538	0.0160421338322604	MIF	brown	UniprotAccessions-brown_DINCH_4_h_strict_GS4_MM4	21	Cluster 4	P14174	vs_LPS	DINCH	11	16h_DINCH_1000nM	*	brown_DINCH_4_h
4716	16h_DINCH_1000nM_ctrlLPS	-0.000913637907690279	0.958539439062789	GNPDA1	brown	UniprotAccessions-brown_DINCH_4_h_strict_GS4_MM4	19	Cluster 3	P46926	vs_LPS	DINCH	11	16h_DINCH_1000nM		brown_DINCH_4_h
4816	16h_DINCH_1000nM_ctrlLPS	0.0481631949523696	0.0157850388381043	ALDH3A2	brown	UniprotAccessions-brown_DINCH_4_h_strict_GS4_MM4	13	Cluster 2	P51648	vs_LPS	DINCH	11	16h_DINCH_1000nM	*	brown_DINCH_4_h
4916	16h_DINCH_1000nM_ctrlLPS	-0.0569740846052935	0.0653687221987396	SUCLG1	brown	UniprotAccessions-brown_DINCH_4_h_strict_GS4_MM4	8	Cluster 3	P53597	vs_LPS	DINCH	11	16h_DINCH_1000nM		brown_DINCH_4_h
5016	16h_DINCH_1000nM_ctrlLPS	-0.00290710656889504	0.808211125952326	EIF3E	brown	UniprotAccessions-brown_DINCH_4_h_strict_GS4_MM4	28	Cluster 3	P60228	vs_LPS	DINCH	11	16h_DINCH_1000nM		brown_DINCH_4_h
5116	16h_DINCH_1000nM_ctrlLPS	-0.0791885645087457	0.00329490282979261	RAC1	brown	UniprotAccessions-brown_DINCH_4_h_strict_GS4_MM4	15	Cluster 3	P63000	vs_LPS	DINCH	11	16h_DINCH_1000nM	**	brown_DINCH_4_h
5216	16h_DINCH_1000nM_ctrlLPS	-0.0316069485201766	0.240091947122545	RAE1	brown	UniprotAccessions-brown_DINCH_4_h_strict_GS4_MM4	26	Cluster 3	P78406	vs_LPS	DINCH	11	16h_DINCH_1000nM		brown_DINCH_4_h
5316	16h_DINCH_1000nM_ctrlLPS	0.0140624659046607	0.72811727864135	ALDH6A1	brown	UniprotAccessions-brown_DINCH_4_h_strict_GS4_MM4	30	Cluster 3	Q02252	vs_LPS	DINCH	11	16h_DINCH_1000nM		brown_DINCH_4_h
5416	16h_DINCH_1000nM_ctrlLPS	-0.0411349193093753	0.199707011192218	NUP160	brown	UniprotAccessions-brown_DINCH_4_h_strict_GS4_MM4	23	Cluster 3	Q12769	vs_LPS	DINCH	11	16h_DINCH_1000nM		brown_DINCH_4_h
5516	16h_DINCH_1000nM_ctrlLPS	NA	NA	MAVS	brown	UniprotAccessions-brown_DINCH_4_h_strict_GS4_MM4	25	Cluster 1	Q7Z434	vs_LPS	DINCH	11	16h_DINCH_1000nM		brown_DINCH_4_h
5616	16h_DINCH_1000nM_ctrlLPS	-0.0004907860858143	0.990741049590489	ITPRIP	brown	UniprotAccessions-brown_DINCH_4_h_strict_GS4_MM4	2	Cluster 2	Q8IWB1	vs_LPS	DINCH	11	16h_DINCH_1000nM		brown_DINCH_4_h
5716	16h_DINCH_1000nM_ctrlLPS	-0.00789578712632538	0.800560643413308	TUBB6	brown	UniprotAccessions-brown_DINCH_4_h_strict_GS4_MM4	27	Cluster 3	Q9BUF5	vs_LPS	DINCH	11	16h_DINCH_1000nM		brown_DINCH_4_h
5816	16h_DINCH_1000nM_ctrlLPS	-0.0493396824494487	0.143863157584014	BOLA2	brown	UniprotAccessions-brown_DINCH_4_h_strict_GS4_MM4	3	Cluster 2	Q9H3K6	vs_LPS	DINCH	11	16h_DINCH_1000nM		brown_DINCH_4_h
5916	16h_DINCH_1000nM_ctrlLPS	-0.0532953955315801	0.19216156840108	RRAGC	brown	UniprotAccessions-brown_DINCH_4_h_strict_GS4_MM4	32	Cluster 2	Q9HB90	vs_LPS	DINCH	11	16h_DINCH_1000nM		brown_DINCH_4_h
6016	16h_DINCH_1000nM_ctrlLPS	-0.0822963799100248	0.028884639994746	OSGEP	brown	UniprotAccessions-brown_DINCH_4_h_strict_GS4_MM4	6	Cluster 2	Q9NPF4	vs_LPS	DINCH	11	16h_DINCH_1000nM	*	brown_DINCH_4_h
6116	16h_DINCH_1000nM_ctrlLPS	-0.0179516884804284	0.700298190050096	BABAM2	brown	UniprotAccessions-brown_DINCH_4_h_strict_GS4_MM4	22	Cluster 2	Q9NXR7	vs_LPS	DINCH	11	16h_DINCH_1000nM		brown_DINCH_4_h
6216	16h_DINCH_1000nM_ctrlLPS	-0.00164023483128559	0.929839433391478	SWAP70	brown	UniprotAccessions-brown_DINCH_4_h_strict_GS4_MM4	9	Cluster 1	Q9UH65	vs_LPS	DINCH	11	16h_DINCH_1000nM		brown_DINCH_4_h
6316	16h_DINCH_1000nM_ctrlLPS	-0.0233932664035888	0.690114851744882	CYB5R1	brown	UniprotAccessions-brown_DINCH_4_h_strict_GS4_MM4	1	Cluster 2	Q9UHQ9	vs_LPS	DINCH	11	16h_DINCH_1000nM		brown_DINCH_4_h
6416	16h_DINCH_1000nM_ctrlLPS	-0.0073779796754734	0.868374392174201	FAF1	brown	UniprotAccessions-brown_DINCH_4_h_strict_GS4_MM4	33	Cluster 3	Q9UNN5	vs_LPS	DINCH	11	16h_DINCH_1000nM		brown_DINCH_4_h
6516	16h_DINCH_1000nM_ctrlLPS	-0.0294618253690761	0.460666943235072	TRAPPC4	brown	UniprotAccessions-brown_DINCH_4_h_strict_GS4_MM4	12	Cluster 2	Q9Y296	vs_LPS	DINCH	11	16h_DINCH_1000nM		brown_DINCH_4_h
6616	16h_DINCH_1000nM_ctrlLPS	0.0587843645422539	0.553148780276032	WBP11	brown	UniprotAccessions-brown_DINCH_4_h_strict_GS4_MM4	29	Cluster 1	Q9Y2W2	vs_LPS	DINCH	11	16h_DINCH_1000nM		brown_DINCH_4_h
11006	16h_DINCH_10000nM_ctrlLPS	0.166199214700611	0.0596697273515215	APOOL	brown	UniprotAccessions-brown_DINCH_4_h_strict_GS4_MM4	4	Cluster 1	A0A087WUX8	vs_LPS	DINCH	12	16h_DINCH_10000nM		brown_DINCH_4_h
2773	16h_DINCH_10000nM_ctrlLPS	0.131867702944082	0.0347134090615272	PVR	brown	UniprotAccessions-brown_DINCH_4_h_strict_GS4_MM4	14	Cluster 2	A0A0A0MSA9	vs_LPS	DINCH	12	16h_DINCH_10000nM	*	brown_DINCH_4_h
3106	16h_DINCH_10000nM_ctrlLPS	NA	NA	BTAF1	brown	UniprotAccessions-brown_DINCH_4_h_strict_GS4_MM4	18	Cluster 2	A0A0A0MTH9	vs_LPS	DINCH	12	16h_DINCH_10000nM		brown_DINCH_4_h
4106	16h_DINCH_10000nM_ctrlLPS	0.0291405863407249	0.0976539042141135	NRDC	brown	UniprotAccessions-brown_DINCH_4_h_strict_GS4_MM4	10	Cluster 3	B1AKJ5	vs_LPS	DINCH	12	16h_DINCH_10000nM		brown_DINCH_4_h
5106	16h_DINCH_10000nM_ctrlLPS	-0.101800377856966	1.14285646131803e-05	ILF2	brown	UniprotAccessions-brown_DINCH_4_h_strict_GS4_MM4	31	Cluster 3	B4DY09	vs_LPS	DINCH	12	16h_DINCH_10000nM	***	brown_DINCH_4_h
6106	16h_DINCH_10000nM_ctrlLPS	0.0110482431574576	0.896271833276754	RFT1	brown	UniprotAccessions-brown_DINCH_4_h_strict_GS4_MM4	11	Cluster 1	B5MDE0	vs_LPS	DINCH	12	16h_DINCH_10000nM		brown_DINCH_4_h
7106	16h_DINCH_10000nM_ctrlLPS	0.059743392151073	0.380058605282043	PAIP1	brown	UniprotAccessions-brown_DINCH_4_h_strict_GS4_MM4	16	Cluster 3	D6REB4	vs_LPS	DINCH	12	16h_DINCH_10000nM		brown_DINCH_4_h
8106	16h_DINCH_10000nM_ctrlLPS	0.059265559521646	0.084141477245371	DENND3	brown	UniprotAccessions-brown_DINCH_4_h_strict_GS4_MM4	17	Cluster 2	E9PF32	vs_LPS	DINCH	12	16h_DINCH_10000nM		brown_DINCH_4_h
9106	16h_DINCH_10000nM_ctrlLPS	-0.0327140344477215	0.858214668465339	TYK2	brown	UniprotAccessions-brown_DINCH_4_h_strict_GS4_MM4	24	Cluster 1	E9PM19	vs_LPS	DINCH	12	16h_DINCH_10000nM		brown_DINCH_4_h
10106	16h_DINCH_10000nM_ctrlLPS	-0.0481309246131985	0.0478850216855978	RTCA	brown	UniprotAccessions-brown_DINCH_4_h_strict_GS4_MM4	5	Cluster 3	O00442	vs_LPS	DINCH	12	16h_DINCH_10000nM	*	brown_DINCH_4_h
11106	16h_DINCH_10000nM_ctrlLPS	-0.0359617800894942	0.347594438323184	ZW10	brown	UniprotAccessions-brown_DINCH_4_h_strict_GS4_MM4	20	Cluster 3	O43264	vs_LPS	DINCH	12	16h_DINCH_10000nM		brown_DINCH_4_h
12106	16h_DINCH_10000nM_ctrlLPS	0.188916338511752	0.374271622852101	CKMT1A	brown	UniprotAccessions-brown_DINCH_4_h_strict_GS4_MM4	7	Cluster 1	P12532	vs_LPS	DINCH	12	16h_DINCH_10000nM		brown_DINCH_4_h
13106	16h_DINCH_10000nM_ctrlLPS	-0.272029303132727	0.220351767672533	MIF	brown	UniprotAccessions-brown_DINCH_4_h_strict_GS4_MM4	21	Cluster 4	P14174	vs_LPS	DINCH	12	16h_DINCH_10000nM		brown_DINCH_4_h
14106	16h_DINCH_10000nM_ctrlLPS	0.044359984575927	0.0635757655267772	GNPDA1	brown	UniprotAccessions-brown_DINCH_4_h_strict_GS4_MM4	19	Cluster 3	P46926	vs_LPS	DINCH	12	16h_DINCH_10000nM		brown_DINCH_4_h
15106	16h_DINCH_10000nM_ctrlLPS	0.0228131820110863	0.550382904315359	ALDH3A2	brown	UniprotAccessions-brown_DINCH_4_h_strict_GS4_MM4	13	Cluster 2	P51648	vs_LPS	DINCH	12	16h_DINCH_10000nM		brown_DINCH_4_h
16106	16h_DINCH_10000nM_ctrlLPS	-0.0271865743152888	0.293169512687328	SUCLG1	brown	UniprotAccessions-brown_DINCH_4_h_strict_GS4_MM4	8	Cluster 3	P53597	vs_LPS	DINCH	12	16h_DINCH_10000nM		brown_DINCH_4_h
17106	16h_DINCH_10000nM_ctrlLPS	-0.00702342257211542	0.61869694620294	EIF3E	brown	UniprotAccessions-brown_DINCH_4_h_strict_GS4_MM4	28	Cluster 3	P60228	vs_LPS	DINCH	12	16h_DINCH_10000nM		brown_DINCH_4_h
18106	16h_DINCH_10000nM_ctrlLPS	-0.0514811012713078	0.288254571470241	RAC1	brown	UniprotAccessions-brown_DINCH_4_h_strict_GS4_MM4	15	Cluster 3	P63000	vs_LPS	DINCH	12	16h_DINCH_10000nM		brown_DINCH_4_h
19106	16h_DINCH_10000nM_ctrlLPS	-0.0423167190192495	0.00682971326707591	RAE1	brown	UniprotAccessions-brown_DINCH_4_h_strict_GS4_MM4	26	Cluster 3	P78406	vs_LPS	DINCH	12	16h_DINCH_10000nM	**	brown_DINCH_4_h
20106	16h_DINCH_10000nM_ctrlLPS	-0.0924995410086556	0.00535441699423163	ALDH6A1	brown	UniprotAccessions-brown_DINCH_4_h_strict_GS4_MM4	30	Cluster 3	Q02252	vs_LPS	DINCH	12	16h_DINCH_10000nM	**	brown_DINCH_4_h
21106	16h_DINCH_10000nM_ctrlLPS	0.0620714823707004	0.373630989419169	NUP160	brown	UniprotAccessions-brown_DINCH_4_h_strict_GS4_MM4	23	Cluster 3	Q12769	vs_LPS	DINCH	12	16h_DINCH_10000nM		brown_DINCH_4_h
22106	16h_DINCH_10000nM_ctrlLPS	NA	NA	MAVS	brown	UniprotAccessions-brown_DINCH_4_h_strict_GS4_MM4	25	Cluster 1	Q7Z434	vs_LPS	DINCH	12	16h_DINCH_10000nM		brown_DINCH_4_h
23106	16h_DINCH_10000nM_ctrlLPS	-0.0153129628161497	0.86403149850869	ITPRIP	brown	UniprotAccessions-brown_DINCH_4_h_strict_GS4_MM4	2	Cluster 2	Q8IWB1	vs_LPS	DINCH	12	16h_DINCH_10000nM		brown_DINCH_4_h
24106	16h_DINCH_10000nM_ctrlLPS	-0.0157904354551063	0.664852070807664	TUBB6	brown	UniprotAccessions-brown_DINCH_4_h_strict_GS4_MM4	27	Cluster 3	Q9BUF5	vs_LPS	DINCH	12	16h_DINCH_10000nM		brown_DINCH_4_h
25106	16h_DINCH_10000nM_ctrlLPS	0.0270811334431526	0.626727070811026	BOLA2	brown	UniprotAccessions-brown_DINCH_4_h_strict_GS4_MM4	3	Cluster 2	Q9H3K6	vs_LPS	DINCH	12	16h_DINCH_10000nM		brown_DINCH_4_h
26106	16h_DINCH_10000nM_ctrlLPS	0.0387373583746129	0.449320521517071	RRAGC	brown	UniprotAccessions-brown_DINCH_4_h_strict_GS4_MM4	32	Cluster 2	Q9HB90	vs_LPS	DINCH	12	16h_DINCH_10000nM		brown_DINCH_4_h
2774	16h_DINCH_10000nM_ctrlLPS	0.113602961521341	0.0620549761577483	OSGEP	brown	UniprotAccessions-brown_DINCH_4_h_strict_GS4_MM4	6	Cluster 2	Q9NPF4	vs_LPS	DINCH	12	16h_DINCH_10000nM		brown_DINCH_4_h
2816	16h_DINCH_10000nM_ctrlLPS	0.0606068104089663	0.282803679503642	BABAM2	brown	UniprotAccessions-brown_DINCH_4_h_strict_GS4_MM4	22	Cluster 2	Q9NXR7	vs_LPS	DINCH	12	16h_DINCH_10000nM		brown_DINCH_4_h
2916	16h_DINCH_10000nM_ctrlLPS	0.020294023201428	0.0100127323617321	SWAP70	brown	UniprotAccessions-brown_DINCH_4_h_strict_GS4_MM4	9	Cluster 1	Q9UH65	vs_LPS	DINCH	12	16h_DINCH_10000nM	*	brown_DINCH_4_h
3016	16h_DINCH_10000nM_ctrlLPS	0.0929773888928656	0.0226923330906868	CYB5R1	brown	UniprotAccessions-brown_DINCH_4_h_strict_GS4_MM4	1	Cluster 2	Q9UHQ9	vs_LPS	DINCH	12	16h_DINCH_10000nM	*	brown_DINCH_4_h
3116	16h_DINCH_10000nM_ctrlLPS	-0.0302805380425954	0.312921425928196	FAF1	brown	UniprotAccessions-brown_DINCH_4_h_strict_GS4_MM4	33	Cluster 3	Q9UNN5	vs_LPS	DINCH	12	16h_DINCH_10000nM		brown_DINCH_4_h
3216	16h_DINCH_10000nM_ctrlLPS	0.0505041125136404	0.103105263662385	TRAPPC4	brown	UniprotAccessions-brown_DINCH_4_h_strict_GS4_MM4	12	Cluster 2	Q9Y296	vs_LPS	DINCH	12	16h_DINCH_10000nM		brown_DINCH_4_h
3316	16h_DINCH_10000nM_ctrlLPS	0.150563261204552	0.515680157924938	WBP11	brown	UniprotAccessions-brown_DINCH_4_h_strict_GS4_MM4	29	Cluster 1	Q9Y2W2	vs_LPS	DINCH	12	16h_DINCH_10000nM		brown_DINCH_4_h
23212	16h_MINCH_10nM_ctrlLPS	0.0598954586685436	0.403050405384421	APOOL	brown	UniprotAccessions-brown_DINCH_4_h_strict_GS4_MM4	4	Cluster 1	A0A087WUX8	vs_LPS	MINCH	13	16h_MINCH_10nM		brown_DINCH_4_h
23312	16h_MINCH_10nM_ctrlLPS	0.064461420702867	0.356473935470849	PVR	brown	UniprotAccessions-brown_DINCH_4_h_strict_GS4_MM4	14	Cluster 2	A0A0A0MSA9	vs_LPS	MINCH	13	16h_MINCH_10nM		brown_DINCH_4_h
23412	16h_MINCH_10nM_ctrlLPS	NA	NA	BTAF1	brown	UniprotAccessions-brown_DINCH_4_h_strict_GS4_MM4	18	Cluster 2	A0A0A0MTH9	vs_LPS	MINCH	13	16h_MINCH_10nM		brown_DINCH_4_h
23512	16h_MINCH_10nM_ctrlLPS	0.0278186160376337	0.352447041570803	NRDC	brown	UniprotAccessions-brown_DINCH_4_h_strict_GS4_MM4	10	Cluster 3	B1AKJ5	vs_LPS	MINCH	13	16h_MINCH_10nM		brown_DINCH_4_h
23612	16h_MINCH_10nM_ctrlLPS	-0.0307010263081664	0.0416647538534915	ILF2	brown	UniprotAccessions-brown_DINCH_4_h_strict_GS4_MM4	31	Cluster 3	B4DY09	vs_LPS	MINCH	13	16h_MINCH_10nM	*	brown_DINCH_4_h
23712	16h_MINCH_10nM_ctrlLPS	0.0783609224141273	0.0783979156719497	RFT1	brown	UniprotAccessions-brown_DINCH_4_h_strict_GS4_MM4	11	Cluster 1	B5MDE0	vs_LPS	MINCH	13	16h_MINCH_10nM		brown_DINCH_4_h
23812	16h_MINCH_10nM_ctrlLPS	0.0447093024014698	0.725976349728557	PAIP1	brown	UniprotAccessions-brown_DINCH_4_h_strict_GS4_MM4	16	Cluster 3	D6REB4	vs_LPS	MINCH	13	16h_MINCH_10nM		brown_DINCH_4_h
23912	16h_MINCH_10nM_ctrlLPS	0.0143534630887059	0.803861287974501	DENND3	brown	UniprotAccessions-brown_DINCH_4_h_strict_GS4_MM4	17	Cluster 2	E9PF32	vs_LPS	MINCH	13	16h_MINCH_10nM		brown_DINCH_4_h
24012	16h_MINCH_10nM_ctrlLPS	0.0324739912185112	0.699771061727168	TYK2	brown	UniprotAccessions-brown_DINCH_4_h_strict_GS4_MM4	24	Cluster 1	E9PM19	vs_LPS	MINCH	13	16h_MINCH_10nM		brown_DINCH_4_h
24112	16h_MINCH_10nM_ctrlLPS	0.0131855886385314	0.730381647078661	RTCA	brown	UniprotAccessions-brown_DINCH_4_h_strict_GS4_MM4	5	Cluster 3	O00442	vs_LPS	MINCH	13	16h_MINCH_10nM		brown_DINCH_4_h
24212	16h_MINCH_10nM_ctrlLPS	-0.0643834279483437	0.372349049007716	ZW10	brown	UniprotAccessions-brown_DINCH_4_h_strict_GS4_MM4	20	Cluster 3	O43264	vs_LPS	MINCH	13	16h_MINCH_10nM		brown_DINCH_4_h
24312	16h_MINCH_10nM_ctrlLPS	0.172313846748855	0.0254040041572016	CKMT1A	brown	UniprotAccessions-brown_DINCH_4_h_strict_GS4_MM4	7	Cluster 1	P12532	vs_LPS	MINCH	13	16h_MINCH_10nM	*	brown_DINCH_4_h
24412	16h_MINCH_10nM_ctrlLPS	0.333824924870478	0.0239061216381318	MIF	brown	UniprotAccessions-brown_DINCH_4_h_strict_GS4_MM4	21	Cluster 4	P14174	vs_LPS	MINCH	13	16h_MINCH_10nM	*	brown_DINCH_4_h
24512	16h_MINCH_10nM_ctrlLPS	0.00782836683357993	0.837888481034916	GNPDA1	brown	UniprotAccessions-brown_DINCH_4_h_strict_GS4_MM4	19	Cluster 3	P46926	vs_LPS	MINCH	13	16h_MINCH_10nM		brown_DINCH_4_h
24612	16h_MINCH_10nM_ctrlLPS	0.0906942173593703	0.408277510409688	ALDH3A2	brown	UniprotAccessions-brown_DINCH_4_h_strict_GS4_MM4	13	Cluster 2	P51648	vs_LPS	MINCH	13	16h_MINCH_10nM		brown_DINCH_4_h
24712	16h_MINCH_10nM_ctrlLPS	-0.0242321523201293	0.571585031210914	SUCLG1	brown	UniprotAccessions-brown_DINCH_4_h_strict_GS4_MM4	8	Cluster 3	P53597	vs_LPS	MINCH	13	16h_MINCH_10nM		brown_DINCH_4_h
24812	16h_MINCH_10nM_ctrlLPS	0.00914267707480558	0.629128620975371	EIF3E	brown	UniprotAccessions-brown_DINCH_4_h_strict_GS4_MM4	28	Cluster 3	P60228	vs_LPS	MINCH	13	16h_MINCH_10nM		brown_DINCH_4_h
24912	16h_MINCH_10nM_ctrlLPS	-0.0563581652076617	0.06267230087821	RAC1	brown	UniprotAccessions-brown_DINCH_4_h_strict_GS4_MM4	15	Cluster 3	P63000	vs_LPS	MINCH	13	16h_MINCH_10nM		brown_DINCH_4_h
25012	16h_MINCH_10nM_ctrlLPS	-0.162990369092271	0.0131275311190999	RAE1	brown	UniprotAccessions-brown_DINCH_4_h_strict_GS4_MM4	26	Cluster 3	P78406	vs_LPS	MINCH	13	16h_MINCH_10nM	*	brown_DINCH_4_h
25112	16h_MINCH_10nM_ctrlLPS	-0.070657152906637	6.86441510638038e-05	ALDH6A1	brown	UniprotAccessions-brown_DINCH_4_h_strict_GS4_MM4	30	Cluster 3	Q02252	vs_LPS	MINCH	13	16h_MINCH_10nM	***	brown_DINCH_4_h
25212	16h_MINCH_10nM_ctrlLPS	-0.079803159866164	0.204192873913182	NUP160	brown	UniprotAccessions-brown_DINCH_4_h_strict_GS4_MM4	23	Cluster 3	Q12769	vs_LPS	MINCH	13	16h_MINCH_10nM		brown_DINCH_4_h
25312	16h_MINCH_10nM_ctrlLPS	NA	NA	MAVS	brown	UniprotAccessions-brown_DINCH_4_h_strict_GS4_MM4	25	Cluster 1	Q7Z434	vs_LPS	MINCH	13	16h_MINCH_10nM		brown_DINCH_4_h
25412	16h_MINCH_10nM_ctrlLPS	-0.12290901513401	0.246098369963593	ITPRIP	brown	UniprotAccessions-brown_DINCH_4_h_strict_GS4_MM4	2	Cluster 2	Q8IWB1	vs_LPS	MINCH	13	16h_MINCH_10nM		brown_DINCH_4_h
25512	16h_MINCH_10nM_ctrlLPS	-0.0181053440050184	0.498781153337009	TUBB6	brown	UniprotAccessions-brown_DINCH_4_h_strict_GS4_MM4	27	Cluster 3	Q9BUF5	vs_LPS	MINCH	13	16h_MINCH_10nM		brown_DINCH_4_h
25612	16h_MINCH_10nM_ctrlLPS	0.0744970719824099	0.4053858036504	BOLA2	brown	UniprotAccessions-brown_DINCH_4_h_strict_GS4_MM4	3	Cluster 2	Q9H3K6	vs_LPS	MINCH	13	16h_MINCH_10nM		brown_DINCH_4_h
25712	16h_MINCH_10nM_ctrlLPS	0.118569632296268	0.0479008960229151	RRAGC	brown	UniprotAccessions-brown_DINCH_4_h_strict_GS4_MM4	32	Cluster 2	Q9HB90	vs_LPS	MINCH	13	16h_MINCH_10nM	*	brown_DINCH_4_h
25812	16h_MINCH_10nM_ctrlLPS	0.120669327011588	0.0141674571488827	OSGEP	brown	UniprotAccessions-brown_DINCH_4_h_strict_GS4_MM4	6	Cluster 2	Q9NPF4	vs_LPS	MINCH	13	16h_MINCH_10nM	*	brown_DINCH_4_h
25912	16h_MINCH_10nM_ctrlLPS	0.0540108362698137	0.0366644691849011	BABAM2	brown	UniprotAccessions-brown_DINCH_4_h_strict_GS4_MM4	22	Cluster 2	Q9NXR7	vs_LPS	MINCH	13	16h_MINCH_10nM	*	brown_DINCH_4_h
26012	16h_MINCH_10nM_ctrlLPS	0.0646367190727628	0.00562730985323171	SWAP70	brown	UniprotAccessions-brown_DINCH_4_h_strict_GS4_MM4	9	Cluster 1	Q9UH65	vs_LPS	MINCH	13	16h_MINCH_10nM	**	brown_DINCH_4_h
26112	16h_MINCH_10nM_ctrlLPS	0.0232041040904686	0.478761154561698	CYB5R1	brown	UniprotAccessions-brown_DINCH_4_h_strict_GS4_MM4	1	Cluster 2	Q9UHQ9	vs_LPS	MINCH	13	16h_MINCH_10nM		brown_DINCH_4_h
26212	16h_MINCH_10nM_ctrlLPS	0.0222295441679612	0.262027259082205	FAF1	brown	UniprotAccessions-brown_DINCH_4_h_strict_GS4_MM4	33	Cluster 3	Q9UNN5	vs_LPS	MINCH	13	16h_MINCH_10nM		brown_DINCH_4_h
26312	16h_MINCH_10nM_ctrlLPS	0.00632447132581613	0.890242933251364	TRAPPC4	brown	UniprotAccessions-brown_DINCH_4_h_strict_GS4_MM4	12	Cluster 2	Q9Y296	vs_LPS	MINCH	13	16h_MINCH_10nM		brown_DINCH_4_h
26412	16h_MINCH_10nM_ctrlLPS	0.125897776591631	0.267337482734911	WBP11	brown	UniprotAccessions-brown_DINCH_4_h_strict_GS4_MM4	29	Cluster 1	Q9Y2W2	vs_LPS	MINCH	13	16h_MINCH_10nM		brown_DINCH_4_h
19912	16h_MINCH_100nM_ctrlLPS	0.227103541292213	0.0398520099708913	APOOL	brown	UniprotAccessions-brown_DINCH_4_h_strict_GS4_MM4	4	Cluster 1	A0A087WUX8	vs_LPS	MINCH	14	16h_MINCH_100nM	*	brown_DINCH_4_h
20012	16h_MINCH_100nM_ctrlLPS	0.0704048033289121	0.143704915300728	PVR	brown	UniprotAccessions-brown_DINCH_4_h_strict_GS4_MM4	14	Cluster 2	A0A0A0MSA9	vs_LPS	MINCH	14	16h_MINCH_100nM		brown_DINCH_4_h
20112	16h_MINCH_100nM_ctrlLPS	NA	NA	BTAF1	brown	UniprotAccessions-brown_DINCH_4_h_strict_GS4_MM4	18	Cluster 2	A0A0A0MTH9	vs_LPS	MINCH	14	16h_MINCH_100nM		brown_DINCH_4_h
20212	16h_MINCH_100nM_ctrlLPS	0.0241447472018971	0.05187303271434	NRDC	brown	UniprotAccessions-brown_DINCH_4_h_strict_GS4_MM4	10	Cluster 3	B1AKJ5	vs_LPS	MINCH	14	16h_MINCH_100nM		brown_DINCH_4_h
20312	16h_MINCH_100nM_ctrlLPS	-0.0645858966150183	0.10388090364637	ILF2	brown	UniprotAccessions-brown_DINCH_4_h_strict_GS4_MM4	31	Cluster 3	B4DY09	vs_LPS	MINCH	14	16h_MINCH_100nM		brown_DINCH_4_h
20412	16h_MINCH_100nM_ctrlLPS	0.109149321981442	0.00363305863904945	RFT1	brown	UniprotAccessions-brown_DINCH_4_h_strict_GS4_MM4	11	Cluster 1	B5MDE0	vs_LPS	MINCH	14	16h_MINCH_100nM	**	brown_DINCH_4_h
20512	16h_MINCH_100nM_ctrlLPS	-0.042302136280962	0.498754806901841	PAIP1	brown	UniprotAccessions-brown_DINCH_4_h_strict_GS4_MM4	16	Cluster 3	D6REB4	vs_LPS	MINCH	14	16h_MINCH_100nM		brown_DINCH_4_h
20612	16h_MINCH_100nM_ctrlLPS	0.109021378483996	0.0693087392938742	DENND3	brown	UniprotAccessions-brown_DINCH_4_h_strict_GS4_MM4	17	Cluster 2	E9PF32	vs_LPS	MINCH	14	16h_MINCH_100nM		brown_DINCH_4_h
20712	16h_MINCH_100nM_ctrlLPS	-0.0444889306670583	0.795756262813081	TYK2	brown	UniprotAccessions-brown_DINCH_4_h_strict_GS4_MM4	24	Cluster 1	E9PM19	vs_LPS	MINCH	14	16h_MINCH_100nM		brown_DINCH_4_h
20812	16h_MINCH_100nM_ctrlLPS	-0.0279976495692827	0.0156549585807817	RTCA	brown	UniprotAccessions-brown_DINCH_4_h_strict_GS4_MM4	5	Cluster 3	O00442	vs_LPS	MINCH	14	16h_MINCH_100nM	*	brown_DINCH_4_h
20912	16h_MINCH_100nM_ctrlLPS	0.0171476442537616	0.296926759591486	ZW10	brown	UniprotAccessions-brown_DINCH_4_h_strict_GS4_MM4	20	Cluster 3	O43264	vs_LPS	MINCH	14	16h_MINCH_100nM		brown_DINCH_4_h
21012	16h_MINCH_100nM_ctrlLPS	0.297792379733896	0.0414553877686818	CKMT1A	brown	UniprotAccessions-brown_DINCH_4_h_strict_GS4_MM4	7	Cluster 1	P12532	vs_LPS	MINCH	14	16h_MINCH_100nM	*	brown_DINCH_4_h
21112	16h_MINCH_100nM_ctrlLPS	0.0725999652912222	0.629563824988275	MIF	brown	UniprotAccessions-brown_DINCH_4_h_strict_GS4_MM4	21	Cluster 4	P14174	vs_LPS	MINCH	14	16h_MINCH_100nM		brown_DINCH_4_h
21212	16h_MINCH_100nM_ctrlLPS	0.0131902730314299	0.657216203004081	GNPDA1	brown	UniprotAccessions-brown_DINCH_4_h_strict_GS4_MM4	19	Cluster 3	P46926	vs_LPS	MINCH	14	16h_MINCH_100nM		brown_DINCH_4_h
21312	16h_MINCH_100nM_ctrlLPS	-0.0364583089076632	0.0291568479143542	ALDH3A2	brown	UniprotAccessions-brown_DINCH_4_h_strict_GS4_MM4	13	Cluster 2	P51648	vs_LPS	MINCH	14	16h_MINCH_100nM	*	brown_DINCH_4_h
21412	16h_MINCH_100nM_ctrlLPS	0.00254618224289244	0.874732472493552	SUCLG1	brown	UniprotAccessions-brown_DINCH_4_h_strict_GS4_MM4	8	Cluster 3	P53597	vs_LPS	MINCH	14	16h_MINCH_100nM		brown_DINCH_4_h
21512	16h_MINCH_100nM_ctrlLPS	0.0114093428576579	0.223866988006868	EIF3E	brown	UniprotAccessions-brown_DINCH_4_h_strict_GS4_MM4	28	Cluster 3	P60228	vs_LPS	MINCH	14	16h_MINCH_100nM		brown_DINCH_4_h
21612	16h_MINCH_100nM_ctrlLPS	0.0123950778481628	0.798756687093976	RAC1	brown	UniprotAccessions-brown_DINCH_4_h_strict_GS4_MM4	15	Cluster 3	P63000	vs_LPS	MINCH	14	16h_MINCH_100nM		brown_DINCH_4_h
21712	16h_MINCH_100nM_ctrlLPS	-0.061481027601754	0.0153832169174302	RAE1	brown	UniprotAccessions-brown_DINCH_4_h_strict_GS4_MM4	26	Cluster 3	P78406	vs_LPS	MINCH	14	16h_MINCH_100nM	*	brown_DINCH_4_h
21812	16h_MINCH_100nM_ctrlLPS	-0.0488729506829603	0.337284824586693	ALDH6A1	brown	UniprotAccessions-brown_DINCH_4_h_strict_GS4_MM4	30	Cluster 3	Q02252	vs_LPS	MINCH	14	16h_MINCH_100nM		brown_DINCH_4_h
21912	16h_MINCH_100nM_ctrlLPS	0.000601826877476182	0.99251100188335	NUP160	brown	UniprotAccessions-brown_DINCH_4_h_strict_GS4_MM4	23	Cluster 3	Q12769	vs_LPS	MINCH	14	16h_MINCH_100nM		brown_DINCH_4_h
22012	16h_MINCH_100nM_ctrlLPS	NA	NA	MAVS	brown	UniprotAccessions-brown_DINCH_4_h_strict_GS4_MM4	25	Cluster 1	Q7Z434	vs_LPS	MINCH	14	16h_MINCH_100nM		brown_DINCH_4_h
22112	16h_MINCH_100nM_ctrlLPS	-0.0164920924923503	0.872277192801471	ITPRIP	brown	UniprotAccessions-brown_DINCH_4_h_strict_GS4_MM4	2	Cluster 2	Q8IWB1	vs_LPS	MINCH	14	16h_MINCH_100nM		brown_DINCH_4_h
22212	16h_MINCH_100nM_ctrlLPS	-0.0709393749331493	0.00627222261249149	TUBB6	brown	UniprotAccessions-brown_DINCH_4_h_strict_GS4_MM4	27	Cluster 3	Q9BUF5	vs_LPS	MINCH	14	16h_MINCH_100nM	**	brown_DINCH_4_h
22312	16h_MINCH_100nM_ctrlLPS	0.0494061689650066	0.594788936532225	BOLA2	brown	UniprotAccessions-brown_DINCH_4_h_strict_GS4_MM4	3	Cluster 2	Q9H3K6	vs_LPS	MINCH	14	16h_MINCH_100nM		brown_DINCH_4_h
22412	16h_MINCH_100nM_ctrlLPS	0.0867145811326448	0.298083285003163	RRAGC	brown	UniprotAccessions-brown_DINCH_4_h_strict_GS4_MM4	32	Cluster 2	Q9HB90	vs_LPS	MINCH	14	16h_MINCH_100nM		brown_DINCH_4_h
22512	16h_MINCH_100nM_ctrlLPS	0.0942392878475324	0.196772543933741	OSGEP	brown	UniprotAccessions-brown_DINCH_4_h_strict_GS4_MM4	6	Cluster 2	Q9NPF4	vs_LPS	MINCH	14	16h_MINCH_100nM		brown_DINCH_4_h
22612	16h_MINCH_100nM_ctrlLPS	0.0757235675446418	0.354431783752199	BABAM2	brown	UniprotAccessions-brown_DINCH_4_h_strict_GS4_MM4	22	Cluster 2	Q9NXR7	vs_LPS	MINCH	14	16h_MINCH_100nM		brown_DINCH_4_h
22712	16h_MINCH_100nM_ctrlLPS	0.0689387964455712	0.0130215616765472	SWAP70	brown	UniprotAccessions-brown_DINCH_4_h_strict_GS4_MM4	9	Cluster 1	Q9UH65	vs_LPS	MINCH	14	16h_MINCH_100nM	*	brown_DINCH_4_h
22812	16h_MINCH_100nM_ctrlLPS	-0.0243092083386569	0.647916617457985	CYB5R1	brown	UniprotAccessions-brown_DINCH_4_h_strict_GS4_MM4	1	Cluster 2	Q9UHQ9	vs_LPS	MINCH	14	16h_MINCH_100nM		brown_DINCH_4_h
22912	16h_MINCH_100nM_ctrlLPS	-0.0365645303838445	0.0418651496585052	FAF1	brown	UniprotAccessions-brown_DINCH_4_h_strict_GS4_MM4	33	Cluster 3	Q9UNN5	vs_LPS	MINCH	14	16h_MINCH_100nM	*	brown_DINCH_4_h
23012	16h_MINCH_100nM_ctrlLPS	0.0525151178336	0.00352454792495653	TRAPPC4	brown	UniprotAccessions-brown_DINCH_4_h_strict_GS4_MM4	12	Cluster 2	Q9Y296	vs_LPS	MINCH	14	16h_MINCH_100nM	**	brown_DINCH_4_h
23112	16h_MINCH_100nM_ctrlLPS	0.295041267252875	0.134592152356563	WBP11	brown	UniprotAccessions-brown_DINCH_4_h_strict_GS4_MM4	29	Cluster 1	Q9Y2W2	vs_LPS	MINCH	14	16h_MINCH_100nM		brown_DINCH_4_h
16612	16h_MINCH_1000nM_ctrlLPS	0.205417371146484	0.0561206359935269	APOOL	brown	UniprotAccessions-brown_DINCH_4_h_strict_GS4_MM4	4	Cluster 1	A0A087WUX8	vs_LPS	MINCH	15	16h_MINCH_1000nM		brown_DINCH_4_h
16712	16h_MINCH_1000nM_ctrlLPS	0.18427970280821	0.0939468775461691	PVR	brown	UniprotAccessions-brown_DINCH_4_h_strict_GS4_MM4	14	Cluster 2	A0A0A0MSA9	vs_LPS	MINCH	15	16h_MINCH_1000nM		brown_DINCH_4_h
16812	16h_MINCH_1000nM_ctrlLPS	NA	NA	BTAF1	brown	UniprotAccessions-brown_DINCH_4_h_strict_GS4_MM4	18	Cluster 2	A0A0A0MTH9	vs_LPS	MINCH	15	16h_MINCH_1000nM		brown_DINCH_4_h
16912	16h_MINCH_1000nM_ctrlLPS	0.0406884084251392	0.230868704110014	NRDC	brown	UniprotAccessions-brown_DINCH_4_h_strict_GS4_MM4	10	Cluster 3	B1AKJ5	vs_LPS	MINCH	15	16h_MINCH_1000nM		brown_DINCH_4_h
17012	16h_MINCH_1000nM_ctrlLPS	-0.0605835505732815	0.028509765030758	ILF2	brown	UniprotAccessions-brown_DINCH_4_h_strict_GS4_MM4	31	Cluster 3	B4DY09	vs_LPS	MINCH	15	16h_MINCH_1000nM	*	brown_DINCH_4_h
17112	16h_MINCH_1000nM_ctrlLPS	0.121800376926728	0.233863870975314	RFT1	brown	UniprotAccessions-brown_DINCH_4_h_strict_GS4_MM4	11	Cluster 1	B5MDE0	vs_LPS	MINCH	15	16h_MINCH_1000nM		brown_DINCH_4_h
17212	16h_MINCH_1000nM_ctrlLPS	0.0224557766174117	0.870294541070474	PAIP1	brown	UniprotAccessions-brown_DINCH_4_h_strict_GS4_MM4	16	Cluster 3	D6REB4	vs_LPS	MINCH	15	16h_MINCH_1000nM		brown_DINCH_4_h
17312	16h_MINCH_1000nM_ctrlLPS	-0.0025503710221947	0.972044364001652	DENND3	brown	UniprotAccessions-brown_DINCH_4_h_strict_GS4_MM4	17	Cluster 2	E9PF32	vs_LPS	MINCH	15	16h_MINCH_1000nM		brown_DINCH_4_h
17412	16h_MINCH_1000nM_ctrlLPS	-0.0057790873092522	0.958140410494945	TYK2	brown	UniprotAccessions-brown_DINCH_4_h_strict_GS4_MM4	24	Cluster 1	E9PM19	vs_LPS	MINCH	15	16h_MINCH_1000nM		brown_DINCH_4_h
17512	16h_MINCH_1000nM_ctrlLPS	-0.0421159560652097	0.157672731675044	RTCA	brown	UniprotAccessions-brown_DINCH_4_h_strict_GS4_MM4	5	Cluster 3	O00442	vs_LPS	MINCH	15	16h_MINCH_1000nM		brown_DINCH_4_h
17612	16h_MINCH_1000nM_ctrlLPS	0.00254633747975426	0.968589450158181	ZW10	brown	UniprotAccessions-brown_DINCH_4_h_strict_GS4_MM4	20	Cluster 3	O43264	vs_LPS	MINCH	15	16h_MINCH_1000nM		brown_DINCH_4_h
17712	16h_MINCH_1000nM_ctrlLPS	0.248846432713506	0.215459282015457	CKMT1A	brown	UniprotAccessions-brown_DINCH_4_h_strict_GS4_MM4	7	Cluster 1	P12532	vs_LPS	MINCH	15	16h_MINCH_1000nM		brown_DINCH_4_h
17812	16h_MINCH_1000nM_ctrlLPS	-0.0633049911990348	0.80116131828825	MIF	brown	UniprotAccessions-brown_DINCH_4_h_strict_GS4_MM4	21	Cluster 4	P14174	vs_LPS	MINCH	15	16h_MINCH_1000nM		brown_DINCH_4_h
17912	16h_MINCH_1000nM_ctrlLPS	0.0363641778943744	0.138998573629344	GNPDA1	brown	UniprotAccessions-brown_DINCH_4_h_strict_GS4_MM4	19	Cluster 3	P46926	vs_LPS	MINCH	15	16h_MINCH_1000nM		brown_DINCH_4_h
18012	16h_MINCH_1000nM_ctrlLPS	0.0881720283955424	0.406516430703362	ALDH3A2	brown	UniprotAccessions-brown_DINCH_4_h_strict_GS4_MM4	13	Cluster 2	P51648	vs_LPS	MINCH	15	16h_MINCH_1000nM		brown_DINCH_4_h
18112	16h_MINCH_1000nM_ctrlLPS	-0.0622500789909358	0.109797748867823	SUCLG1	brown	UniprotAccessions-brown_DINCH_4_h_strict_GS4_MM4	8	Cluster 3	P53597	vs_LPS	MINCH	15	16h_MINCH_1000nM		brown_DINCH_4_h
18212	16h_MINCH_1000nM_ctrlLPS	-0.0170244612467801	0.495066289499699	EIF3E	brown	UniprotAccessions-brown_DINCH_4_h_strict_GS4_MM4	28	Cluster 3	P60228	vs_LPS	MINCH	15	16h_MINCH_1000nM		brown_DINCH_4_h
18312	16h_MINCH_1000nM_ctrlLPS	0.0496083634028009	0.340184604828907	RAC1	brown	UniprotAccessions-brown_DINCH_4_h_strict_GS4_MM4	15	Cluster 3	P63000	vs_LPS	MINCH	15	16h_MINCH_1000nM		brown_DINCH_4_h
18412	16h_MINCH_1000nM_ctrlLPS	-0.0655676582014112	0.203368664154295	RAE1	brown	UniprotAccessions-brown_DINCH_4_h_strict_GS4_MM4	26	Cluster 3	P78406	vs_LPS	MINCH	15	16h_MINCH_1000nM		brown_DINCH_4_h
18512	16h_MINCH_1000nM_ctrlLPS	-0.142312627439462	0.323771539083135	ALDH6A1	brown	UniprotAccessions-brown_DINCH_4_h_strict_GS4_MM4	30	Cluster 3	Q02252	vs_LPS	MINCH	15	16h_MINCH_1000nM		brown_DINCH_4_h
18612	16h_MINCH_1000nM_ctrlLPS	0.0246979428639664	0.71631551871879	NUP160	brown	UniprotAccessions-brown_DINCH_4_h_strict_GS4_MM4	23	Cluster 3	Q12769	vs_LPS	MINCH	15	16h_MINCH_1000nM		brown_DINCH_4_h
18712	16h_MINCH_1000nM_ctrlLPS	NA	NA	MAVS	brown	UniprotAccessions-brown_DINCH_4_h_strict_GS4_MM4	25	Cluster 1	Q7Z434	vs_LPS	MINCH	15	16h_MINCH_1000nM		brown_DINCH_4_h
18812	16h_MINCH_1000nM_ctrlLPS	0.0220287273198713	0.731137634561753	ITPRIP	brown	UniprotAccessions-brown_DINCH_4_h_strict_GS4_MM4	2	Cluster 2	Q8IWB1	vs_LPS	MINCH	15	16h_MINCH_1000nM		brown_DINCH_4_h
18912	16h_MINCH_1000nM_ctrlLPS	-0.110551744343616	0.0286784836808982	TUBB6	brown	UniprotAccessions-brown_DINCH_4_h_strict_GS4_MM4	27	Cluster 3	Q9BUF5	vs_LPS	MINCH	15	16h_MINCH_1000nM	*	brown_DINCH_4_h
19012	16h_MINCH_1000nM_ctrlLPS	-0.00825584512615579	0.892702588655282	BOLA2	brown	UniprotAccessions-brown_DINCH_4_h_strict_GS4_MM4	3	Cluster 2	Q9H3K6	vs_LPS	MINCH	15	16h_MINCH_1000nM		brown_DINCH_4_h
19112	16h_MINCH_1000nM_ctrlLPS	0.0716464961096049	0.291193828591242	RRAGC	brown	UniprotAccessions-brown_DINCH_4_h_strict_GS4_MM4	32	Cluster 2	Q9HB90	vs_LPS	MINCH	15	16h_MINCH_1000nM		brown_DINCH_4_h
19212	16h_MINCH_1000nM_ctrlLPS	0.25118596575359	0.000361266654236052	OSGEP	brown	UniprotAccessions-brown_DINCH_4_h_strict_GS4_MM4	6	Cluster 2	Q9NPF4	vs_LPS	MINCH	15	16h_MINCH_1000nM	***	brown_DINCH_4_h
19312	16h_MINCH_1000nM_ctrlLPS	0.14495843230155	0.0196532528515456	BABAM2	brown	UniprotAccessions-brown_DINCH_4_h_strict_GS4_MM4	22	Cluster 2	Q9NXR7	vs_LPS	MINCH	15	16h_MINCH_1000nM	*	brown_DINCH_4_h
19412	16h_MINCH_1000nM_ctrlLPS	0.129024871743565	0.0827358382257432	SWAP70	brown	UniprotAccessions-brown_DINCH_4_h_strict_GS4_MM4	9	Cluster 1	Q9UH65	vs_LPS	MINCH	15	16h_MINCH_1000nM		brown_DINCH_4_h
19512	16h_MINCH_1000nM_ctrlLPS	0.0272725973861248	0.754288120252169	CYB5R1	brown	UniprotAccessions-brown_DINCH_4_h_strict_GS4_MM4	1	Cluster 2	Q9UHQ9	vs_LPS	MINCH	15	16h_MINCH_1000nM		brown_DINCH_4_h
19612	16h_MINCH_1000nM_ctrlLPS	-0.0102607627672996	0.849103010981042	FAF1	brown	UniprotAccessions-brown_DINCH_4_h_strict_GS4_MM4	33	Cluster 3	Q9UNN5	vs_LPS	MINCH	15	16h_MINCH_1000nM		brown_DINCH_4_h
19712	16h_MINCH_1000nM_ctrlLPS	0.0337065947260286	0.519433687257039	TRAPPC4	brown	UniprotAccessions-brown_DINCH_4_h_strict_GS4_MM4	12	Cluster 2	Q9Y296	vs_LPS	MINCH	15	16h_MINCH_1000nM		brown_DINCH_4_h
19812	16h_MINCH_1000nM_ctrlLPS	0.255591346027793	0.115082789254261	WBP11	brown	UniprotAccessions-brown_DINCH_4_h_strict_GS4_MM4	29	Cluster 1	Q9Y2W2	vs_LPS	MINCH	15	16h_MINCH_1000nM		brown_DINCH_4_h
13312	16h_MINCH_10000nM_ctrlLPS	0.228979572255916	0.045131804156484	APOOL	brown	UniprotAccessions-brown_DINCH_4_h_strict_GS4_MM4	4	Cluster 1	A0A087WUX8	vs_LPS	MINCH	16	16h_MINCH_10000nM	*	brown_DINCH_4_h
13412	16h_MINCH_10000nM_ctrlLPS	0.149923107711453	0.164216132370447	PVR	brown	UniprotAccessions-brown_DINCH_4_h_strict_GS4_MM4	14	Cluster 2	A0A0A0MSA9	vs_LPS	MINCH	16	16h_MINCH_10000nM		brown_DINCH_4_h
13512	16h_MINCH_10000nM_ctrlLPS	NA	NA	BTAF1	brown	UniprotAccessions-brown_DINCH_4_h_strict_GS4_MM4	18	Cluster 2	A0A0A0MTH9	vs_LPS	MINCH	16	16h_MINCH_10000nM		brown_DINCH_4_h
13612	16h_MINCH_10000nM_ctrlLPS	-0.0183875866220647	0.568537872973709	NRDC	brown	UniprotAccessions-brown_DINCH_4_h_strict_GS4_MM4	10	Cluster 3	B1AKJ5	vs_LPS	MINCH	16	16h_MINCH_10000nM		brown_DINCH_4_h
13712	16h_MINCH_10000nM_ctrlLPS	-0.133416143277043	0.00147605607088508	ILF2	brown	UniprotAccessions-brown_DINCH_4_h_strict_GS4_MM4	31	Cluster 3	B4DY09	vs_LPS	MINCH	16	16h_MINCH_10000nM	**	brown_DINCH_4_h
13812	16h_MINCH_10000nM_ctrlLPS	0.102738441494607	0.134669389021431	RFT1	brown	UniprotAccessions-brown_DINCH_4_h_strict_GS4_MM4	11	Cluster 1	B5MDE0	vs_LPS	MINCH	16	16h_MINCH_10000nM		brown_DINCH_4_h
13912	16h_MINCH_10000nM_ctrlLPS	-0.134530083049477	0.0324609183845068	PAIP1	brown	UniprotAccessions-brown_DINCH_4_h_strict_GS4_MM4	16	Cluster 3	D6REB4	vs_LPS	MINCH	16	16h_MINCH_10000nM	*	brown_DINCH_4_h
14012	16h_MINCH_10000nM_ctrlLPS	0.0189816541736609	0.526921490631804	DENND3	brown	UniprotAccessions-brown_DINCH_4_h_strict_GS4_MM4	17	Cluster 2	E9PF32	vs_LPS	MINCH	16	16h_MINCH_10000nM		brown_DINCH_4_h
14112	16h_MINCH_10000nM_ctrlLPS	-0.197070419887688	0.254338440132305	TYK2	brown	UniprotAccessions-brown_DINCH_4_h_strict_GS4_MM4	24	Cluster 1	E9PM19	vs_LPS	MINCH	16	16h_MINCH_10000nM		brown_DINCH_4_h
14212	16h_MINCH_10000nM_ctrlLPS	-0.03795445514638	0.236319007865781	RTCA	brown	UniprotAccessions-brown_DINCH_4_h_strict_GS4_MM4	5	Cluster 3	O00442	vs_LPS	MINCH	16	16h_MINCH_10000nM		brown_DINCH_4_h
14312	16h_MINCH_10000nM_ctrlLPS	-0.0750577867012865	0.305024132870924	ZW10	brown	UniprotAccessions-brown_DINCH_4_h_strict_GS4_MM4	20	Cluster 3	O43264	vs_LPS	MINCH	16	16h_MINCH_10000nM		brown_DINCH_4_h
14412	16h_MINCH_10000nM_ctrlLPS	0.132941085162152	0.20518284082981	CKMT1A	brown	UniprotAccessions-brown_DINCH_4_h_strict_GS4_MM4	7	Cluster 1	P12532	vs_LPS	MINCH	16	16h_MINCH_10000nM		brown_DINCH_4_h
14512	16h_MINCH_10000nM_ctrlLPS	-0.254267250534637	0.340993875414384	MIF	brown	UniprotAccessions-brown_DINCH_4_h_strict_GS4_MM4	21	Cluster 4	P14174	vs_LPS	MINCH	16	16h_MINCH_10000nM		brown_DINCH_4_h
14612	16h_MINCH_10000nM_ctrlLPS	0.0413690420605241	0.140018565094753	GNPDA1	brown	UniprotAccessions-brown_DINCH_4_h_strict_GS4_MM4	19	Cluster 3	P46926	vs_LPS	MINCH	16	16h_MINCH_10000nM		brown_DINCH_4_h
14712	16h_MINCH_10000nM_ctrlLPS	0.0343393071446977	0.730923568607497	ALDH3A2	brown	UniprotAccessions-brown_DINCH_4_h_strict_GS4_MM4	13	Cluster 2	P51648	vs_LPS	MINCH	16	16h_MINCH_10000nM		brown_DINCH_4_h
14812	16h_MINCH_10000nM_ctrlLPS	-0.0398205623705113	0.496936425622806	SUCLG1	brown	UniprotAccessions-brown_DINCH_4_h_strict_GS4_MM4	8	Cluster 3	P53597	vs_LPS	MINCH	16	16h_MINCH_10000nM		brown_DINCH_4_h
14912	16h_MINCH_10000nM_ctrlLPS	0.0179884247942971	0.426260494139833	EIF3E	brown	UniprotAccessions-brown_DINCH_4_h_strict_GS4_MM4	28	Cluster 3	P60228	vs_LPS	MINCH	16	16h_MINCH_10000nM		brown_DINCH_4_h
15012	16h_MINCH_10000nM_ctrlLPS	0.027476438106595	0.469915820213073	RAC1	brown	UniprotAccessions-brown_DINCH_4_h_strict_GS4_MM4	15	Cluster 3	P63000	vs_LPS	MINCH	16	16h_MINCH_10000nM		brown_DINCH_4_h
15112	16h_MINCH_10000nM_ctrlLPS	-0.0627388014740763	0.0636991532046469	RAE1	brown	UniprotAccessions-brown_DINCH_4_h_strict_GS4_MM4	26	Cluster 3	P78406	vs_LPS	MINCH	16	16h_MINCH_10000nM		brown_DINCH_4_h
15212	16h_MINCH_10000nM_ctrlLPS	-0.109159101437467	0.262113949525849	ALDH6A1	brown	UniprotAccessions-brown_DINCH_4_h_strict_GS4_MM4	30	Cluster 3	Q02252	vs_LPS	MINCH	16	16h_MINCH_10000nM		brown_DINCH_4_h
15312	16h_MINCH_10000nM_ctrlLPS	-0.070633450490484	0.450921681365095	NUP160	brown	UniprotAccessions-brown_DINCH_4_h_strict_GS4_MM4	23	Cluster 3	Q12769	vs_LPS	MINCH	16	16h_MINCH_10000nM		brown_DINCH_4_h
15412	16h_MINCH_10000nM_ctrlLPS	NA	NA	MAVS	brown	UniprotAccessions-brown_DINCH_4_h_strict_GS4_MM4	25	Cluster 1	Q7Z434	vs_LPS	MINCH	16	16h_MINCH_10000nM		brown_DINCH_4_h
15512	16h_MINCH_10000nM_ctrlLPS	-0.0629508907470168	0.665748115951415	ITPRIP	brown	UniprotAccessions-brown_DINCH_4_h_strict_GS4_MM4	2	Cluster 2	Q8IWB1	vs_LPS	MINCH	16	16h_MINCH_10000nM		brown_DINCH_4_h
15612	16h_MINCH_10000nM_ctrlLPS	-0.0736676210707092	0.143193753705807	TUBB6	brown	UniprotAccessions-brown_DINCH_4_h_strict_GS4_MM4	27	Cluster 3	Q9BUF5	vs_LPS	MINCH	16	16h_MINCH_10000nM		brown_DINCH_4_h
15712	16h_MINCH_10000nM_ctrlLPS	0.0135569028116545	0.911279604036203	BOLA2	brown	UniprotAccessions-brown_DINCH_4_h_strict_GS4_MM4	3	Cluster 2	Q9H3K6	vs_LPS	MINCH	16	16h_MINCH_10000nM		brown_DINCH_4_h
15812	16h_MINCH_10000nM_ctrlLPS	0.0444193366512905	0.0955150050257407	RRAGC	brown	UniprotAccessions-brown_DINCH_4_h_strict_GS4_MM4	32	Cluster 2	Q9HB90	vs_LPS	MINCH	16	16h_MINCH_10000nM		brown_DINCH_4_h
15912	16h_MINCH_10000nM_ctrlLPS	0.18818386594512	0.00230518329440587	OSGEP	brown	UniprotAccessions-brown_DINCH_4_h_strict_GS4_MM4	6	Cluster 2	Q9NPF4	vs_LPS	MINCH	16	16h_MINCH_10000nM	**	brown_DINCH_4_h
16012	16h_MINCH_10000nM_ctrlLPS	0.071958347151241	0.59268106109344	BABAM2	brown	UniprotAccessions-brown_DINCH_4_h_strict_GS4_MM4	22	Cluster 2	Q9NXR7	vs_LPS	MINCH	16	16h_MINCH_10000nM		brown_DINCH_4_h
16112	16h_MINCH_10000nM_ctrlLPS	0.101150490360718	0.0734992242029151	SWAP70	brown	UniprotAccessions-brown_DINCH_4_h_strict_GS4_MM4	9	Cluster 1	Q9UH65	vs_LPS	MINCH	16	16h_MINCH_10000nM		brown_DINCH_4_h
16212	16h_MINCH_10000nM_ctrlLPS	-0.0195626508345762	0.806402552205499	CYB5R1	brown	UniprotAccessions-brown_DINCH_4_h_strict_GS4_MM4	1	Cluster 2	Q9UHQ9	vs_LPS	MINCH	16	16h_MINCH_10000nM		brown_DINCH_4_h
16312	16h_MINCH_10000nM_ctrlLPS	-0.0432168086919225	0.191882884164521	FAF1	brown	UniprotAccessions-brown_DINCH_4_h_strict_GS4_MM4	33	Cluster 3	Q9UNN5	vs_LPS	MINCH	16	16h_MINCH_10000nM		brown_DINCH_4_h
16412	16h_MINCH_10000nM_ctrlLPS	-0.00877217721381145	0.77009901086636	TRAPPC4	brown	UniprotAccessions-brown_DINCH_4_h_strict_GS4_MM4	12	Cluster 2	Q9Y296	vs_LPS	MINCH	16	16h_MINCH_10000nM		brown_DINCH_4_h
16512	16h_MINCH_10000nM_ctrlLPS	0.322528749621849	0.012468263996861	WBP11	brown	UniprotAccessions-brown_DINCH_4_h_strict_GS4_MM4	29	Cluster 1	Q9Y2W2	vs_LPS	MINCH	16	16h_MINCH_10000nM	*	brown_DINCH_4_h
3641	1d_DINCH_10nM_ctrlLPS	0.0623830777550477	0.149453734438204	APOOL	brown	UniprotAccessions-brown_DINCH_4_h_strict_GS4_MM4	4	Cluster 1	A0A087WUX8	vs_LPS	DINCH	17	1d_DINCH_10nM		brown_DINCH_4_h
3651	1d_DINCH_10nM_ctrlLPS	0.0913639441892205	0.00238017961480943	PVR	brown	UniprotAccessions-brown_DINCH_4_h_strict_GS4_MM4	14	Cluster 2	A0A0A0MSA9	vs_LPS	DINCH	17	1d_DINCH_10nM	**	brown_DINCH_4_h
3661	1d_DINCH_10nM_ctrlLPS	-0.0670831701251758	0.627157371776691	BTAF1	brown	UniprotAccessions-brown_DINCH_4_h_strict_GS4_MM4	18	Cluster 2	A0A0A0MTH9	vs_LPS	DINCH	17	1d_DINCH_10nM		brown_DINCH_4_h
3671	1d_DINCH_10nM_ctrlLPS	-0.00695605727535311	0.473469493938955	NRDC	brown	UniprotAccessions-brown_DINCH_4_h_strict_GS4_MM4	10	Cluster 3	B1AKJ5	vs_LPS	DINCH	17	1d_DINCH_10nM		brown_DINCH_4_h
3681	1d_DINCH_10nM_ctrlLPS	0.0335776129043783	0.0254474150737931	ILF2	brown	UniprotAccessions-brown_DINCH_4_h_strict_GS4_MM4	31	Cluster 3	B4DY09	vs_LPS	DINCH	17	1d_DINCH_10nM	*	brown_DINCH_4_h
3691	1d_DINCH_10nM_ctrlLPS	NA	NA	RFT1	brown	UniprotAccessions-brown_DINCH_4_h_strict_GS4_MM4	11	Cluster 1	B5MDE0	vs_LPS	DINCH	17	1d_DINCH_10nM		brown_DINCH_4_h
3701	1d_DINCH_10nM_ctrlLPS	-0.150473355720102	0.0813897786177755	PAIP1	brown	UniprotAccessions-brown_DINCH_4_h_strict_GS4_MM4	16	Cluster 3	D6REB4	vs_LPS	DINCH	17	1d_DINCH_10nM		brown_DINCH_4_h
3717	1d_DINCH_10nM_ctrlLPS	-0.0137845509658194	0.654660045771933	DENND3	brown	UniprotAccessions-brown_DINCH_4_h_strict_GS4_MM4	17	Cluster 2	E9PF32	vs_LPS	DINCH	17	1d_DINCH_10nM		brown_DINCH_4_h
3721	1d_DINCH_10nM_ctrlLPS	0.0268274968584049	0.813388117974256	TYK2	brown	UniprotAccessions-brown_DINCH_4_h_strict_GS4_MM4	24	Cluster 1	E9PM19	vs_LPS	DINCH	17	1d_DINCH_10nM		brown_DINCH_4_h
3731	1d_DINCH_10nM_ctrlLPS	-0.0560995466197989	0.228062632752594	RTCA	brown	UniprotAccessions-brown_DINCH_4_h_strict_GS4_MM4	5	Cluster 3	O00442	vs_LPS	DINCH	17	1d_DINCH_10nM		brown_DINCH_4_h
3741	1d_DINCH_10nM_ctrlLPS	-0.0959592161223604	0.0359853840931748	ZW10	brown	UniprotAccessions-brown_DINCH_4_h_strict_GS4_MM4	20	Cluster 3	O43264	vs_LPS	DINCH	17	1d_DINCH_10nM	*	brown_DINCH_4_h
3751	1d_DINCH_10nM_ctrlLPS	NA	NA	CKMT1A	brown	UniprotAccessions-brown_DINCH_4_h_strict_GS4_MM4	7	Cluster 1	P12532	vs_LPS	DINCH	17	1d_DINCH_10nM		brown_DINCH_4_h
3761	1d_DINCH_10nM_ctrlLPS	-0.17140220188959	0.266733728098762	MIF	brown	UniprotAccessions-brown_DINCH_4_h_strict_GS4_MM4	21	Cluster 4	P14174	vs_LPS	DINCH	17	1d_DINCH_10nM		brown_DINCH_4_h
3771	1d_DINCH_10nM_ctrlLPS	0.0018214651704741	0.931892813760129	GNPDA1	brown	UniprotAccessions-brown_DINCH_4_h_strict_GS4_MM4	19	Cluster 3	P46926	vs_LPS	DINCH	17	1d_DINCH_10nM		brown_DINCH_4_h
3781	1d_DINCH_10nM_ctrlLPS	NA	NA	ALDH3A2	brown	UniprotAccessions-brown_DINCH_4_h_strict_GS4_MM4	13	Cluster 2	P51648	vs_LPS	DINCH	17	1d_DINCH_10nM		brown_DINCH_4_h
3791	1d_DINCH_10nM_ctrlLPS	0.0161964646115043	0.306320121815816	SUCLG1	brown	UniprotAccessions-brown_DINCH_4_h_strict_GS4_MM4	8	Cluster 3	P53597	vs_LPS	DINCH	17	1d_DINCH_10nM		brown_DINCH_4_h
3801	1d_DINCH_10nM_ctrlLPS	0.0250011048749053	0.0616685913652048	EIF3E	brown	UniprotAccessions-brown_DINCH_4_h_strict_GS4_MM4	28	Cluster 3	P60228	vs_LPS	DINCH	17	1d_DINCH_10nM		brown_DINCH_4_h
3817	1d_DINCH_10nM_ctrlLPS	-0.0301811481856202	0.685190325182302	RAC1	brown	UniprotAccessions-brown_DINCH_4_h_strict_GS4_MM4	15	Cluster 3	P63000	vs_LPS	DINCH	17	1d_DINCH_10nM		brown_DINCH_4_h
3821	1d_DINCH_10nM_ctrlLPS	-0.277012224319742	1.09773256169293e-05	RAE1	brown	UniprotAccessions-brown_DINCH_4_h_strict_GS4_MM4	26	Cluster 3	P78406	vs_LPS	DINCH	17	1d_DINCH_10nM	***	brown_DINCH_4_h
3831	1d_DINCH_10nM_ctrlLPS	-0.0189859633885725	0.522553842921998	ALDH6A1	brown	UniprotAccessions-brown_DINCH_4_h_strict_GS4_MM4	30	Cluster 3	Q02252	vs_LPS	DINCH	17	1d_DINCH_10nM		brown_DINCH_4_h
3841	1d_DINCH_10nM_ctrlLPS	-0.262175275653398	0.0316181778943442	NUP160	brown	UniprotAccessions-brown_DINCH_4_h_strict_GS4_MM4	23	Cluster 3	Q12769	vs_LPS	DINCH	17	1d_DINCH_10nM	*	brown_DINCH_4_h
3851	1d_DINCH_10nM_ctrlLPS	-0.119424564262447	0.40389026307827	MAVS	brown	UniprotAccessions-brown_DINCH_4_h_strict_GS4_MM4	25	Cluster 1	Q7Z434	vs_LPS	DINCH	17	1d_DINCH_10nM		brown_DINCH_4_h
3861	1d_DINCH_10nM_ctrlLPS	0.0301231499669902	0.683219380180419	ITPRIP	brown	UniprotAccessions-brown_DINCH_4_h_strict_GS4_MM4	2	Cluster 2	Q8IWB1	vs_LPS	DINCH	17	1d_DINCH_10nM		brown_DINCH_4_h
3871	1d_DINCH_10nM_ctrlLPS	-0.0297340012359337	0.00703851397589522	TUBB6	brown	UniprotAccessions-brown_DINCH_4_h_strict_GS4_MM4	27	Cluster 3	Q9BUF5	vs_LPS	DINCH	17	1d_DINCH_10nM	**	brown_DINCH_4_h
3881	1d_DINCH_10nM_ctrlLPS	-0.124459671625662	0.0852666080851715	BOLA2	brown	UniprotAccessions-brown_DINCH_4_h_strict_GS4_MM4	3	Cluster 2	Q9H3K6	vs_LPS	DINCH	17	1d_DINCH_10nM		brown_DINCH_4_h
3891	1d_DINCH_10nM_ctrlLPS	-0.000264813329732022	0.997591758325307	RRAGC	brown	UniprotAccessions-brown_DINCH_4_h_strict_GS4_MM4	32	Cluster 2	Q9HB90	vs_LPS	DINCH	17	1d_DINCH_10nM		brown_DINCH_4_h
3901	1d_DINCH_10nM_ctrlLPS	-0.0506688128711458	0.475358284518126	OSGEP	brown	UniprotAccessions-brown_DINCH_4_h_strict_GS4_MM4	6	Cluster 2	Q9NPF4	vs_LPS	DINCH	17	1d_DINCH_10nM		brown_DINCH_4_h
3917	1d_DINCH_10nM_ctrlLPS	0.0901031650451227	0.277636627039282	BABAM2	brown	UniprotAccessions-brown_DINCH_4_h_strict_GS4_MM4	22	Cluster 2	Q9NXR7	vs_LPS	DINCH	17	1d_DINCH_10nM		brown_DINCH_4_h
3921	1d_DINCH_10nM_ctrlLPS	0.0862364188257756	0.0538744212494777	SWAP70	brown	UniprotAccessions-brown_DINCH_4_h_strict_GS4_MM4	9	Cluster 1	Q9UH65	vs_LPS	DINCH	17	1d_DINCH_10nM		brown_DINCH_4_h
3931	1d_DINCH_10nM_ctrlLPS	-0.0185675323403143	0.707642927612808	CYB5R1	brown	UniprotAccessions-brown_DINCH_4_h_strict_GS4_MM4	1	Cluster 2	Q9UHQ9	vs_LPS	DINCH	17	1d_DINCH_10nM		brown_DINCH_4_h
3941	1d_DINCH_10nM_ctrlLPS	-0.0237640177934005	0.160587562966388	FAF1	brown	UniprotAccessions-brown_DINCH_4_h_strict_GS4_MM4	33	Cluster 3	Q9UNN5	vs_LPS	DINCH	17	1d_DINCH_10nM		brown_DINCH_4_h
3951	1d_DINCH_10nM_ctrlLPS	-0.161348259721459	0.164570913792499	TRAPPC4	brown	UniprotAccessions-brown_DINCH_4_h_strict_GS4_MM4	12	Cluster 2	Q9Y296	vs_LPS	DINCH	17	1d_DINCH_10nM		brown_DINCH_4_h
3961	1d_DINCH_10nM_ctrlLPS	0.0127381319757354	0.868697578515865	WBP11	brown	UniprotAccessions-brown_DINCH_4_h_strict_GS4_MM4	29	Cluster 1	Q9Y2W2	vs_LPS	DINCH	17	1d_DINCH_10nM		brown_DINCH_4_h
3317	1d_DINCH_100nM_ctrlLPS	0.115959818110034	0.128762060053466	APOOL	brown	UniprotAccessions-brown_DINCH_4_h_strict_GS4_MM4	4	Cluster 1	A0A087WUX8	vs_LPS	DINCH	18	1d_DINCH_100nM		brown_DINCH_4_h
3321	1d_DINCH_100nM_ctrlLPS	0.0703524804353667	0.287601134508245	PVR	brown	UniprotAccessions-brown_DINCH_4_h_strict_GS4_MM4	14	Cluster 2	A0A0A0MSA9	vs_LPS	DINCH	18	1d_DINCH_100nM		brown_DINCH_4_h
3331	1d_DINCH_100nM_ctrlLPS	0.0503556926243121	0.42134468906158	BTAF1	brown	UniprotAccessions-brown_DINCH_4_h_strict_GS4_MM4	18	Cluster 2	A0A0A0MTH9	vs_LPS	DINCH	18	1d_DINCH_100nM		brown_DINCH_4_h
3341	1d_DINCH_100nM_ctrlLPS	-0.000708859638562795	0.961295405292296	NRDC	brown	UniprotAccessions-brown_DINCH_4_h_strict_GS4_MM4	10	Cluster 3	B1AKJ5	vs_LPS	DINCH	18	1d_DINCH_100nM		brown_DINCH_4_h
3351	1d_DINCH_100nM_ctrlLPS	-0.030743606405198	0.247698581024279	ILF2	brown	UniprotAccessions-brown_DINCH_4_h_strict_GS4_MM4	31	Cluster 3	B4DY09	vs_LPS	DINCH	18	1d_DINCH_100nM		brown_DINCH_4_h
3361	1d_DINCH_100nM_ctrlLPS	NA	NA	RFT1	brown	UniprotAccessions-brown_DINCH_4_h_strict_GS4_MM4	11	Cluster 1	B5MDE0	vs_LPS	DINCH	18	1d_DINCH_100nM		brown_DINCH_4_h
3371	1d_DINCH_100nM_ctrlLPS	-0.0694666285593537	6.23629678388588e-05	PAIP1	brown	UniprotAccessions-brown_DINCH_4_h_strict_GS4_MM4	16	Cluster 3	D6REB4	vs_LPS	DINCH	18	1d_DINCH_100nM	***	brown_DINCH_4_h
3381	1d_DINCH_100nM_ctrlLPS	-0.00819775678066412	0.579582196246489	DENND3	brown	UniprotAccessions-brown_DINCH_4_h_strict_GS4_MM4	17	Cluster 2	E9PF32	vs_LPS	DINCH	18	1d_DINCH_100nM		brown_DINCH_4_h
3391	1d_DINCH_100nM_ctrlLPS	0.00807670279995393	0.804570158641946	TYK2	brown	UniprotAccessions-brown_DINCH_4_h_strict_GS4_MM4	24	Cluster 1	E9PM19	vs_LPS	DINCH	18	1d_DINCH_100nM		brown_DINCH_4_h
3401	1d_DINCH_100nM_ctrlLPS	-0.0380153863862092	0.286187610755368	RTCA	brown	UniprotAccessions-brown_DINCH_4_h_strict_GS4_MM4	5	Cluster 3	O00442	vs_LPS	DINCH	18	1d_DINCH_100nM		brown_DINCH_4_h
3417	1d_DINCH_100nM_ctrlLPS	-0.0248707254161225	0.662209127175657	ZW10	brown	UniprotAccessions-brown_DINCH_4_h_strict_GS4_MM4	20	Cluster 3	O43264	vs_LPS	DINCH	18	1d_DINCH_100nM		brown_DINCH_4_h
3421	1d_DINCH_100nM_ctrlLPS	NA	NA	CKMT1A	brown	UniprotAccessions-brown_DINCH_4_h_strict_GS4_MM4	7	Cluster 1	P12532	vs_LPS	DINCH	18	1d_DINCH_100nM		brown_DINCH_4_h
3431	1d_DINCH_100nM_ctrlLPS	-0.514159271205438	0.000159223933686549	MIF	brown	UniprotAccessions-brown_DINCH_4_h_strict_GS4_MM4	21	Cluster 4	P14174	vs_LPS	DINCH	18	1d_DINCH_100nM	***	brown_DINCH_4_h
3441	1d_DINCH_100nM_ctrlLPS	0.0219100585160526	0.0498670269151548	GNPDA1	brown	UniprotAccessions-brown_DINCH_4_h_strict_GS4_MM4	19	Cluster 3	P46926	vs_LPS	DINCH	18	1d_DINCH_100nM	*	brown_DINCH_4_h
3451	1d_DINCH_100nM_ctrlLPS	NA	NA	ALDH3A2	brown	UniprotAccessions-brown_DINCH_4_h_strict_GS4_MM4	13	Cluster 2	P51648	vs_LPS	DINCH	18	1d_DINCH_100nM		brown_DINCH_4_h
3461	1d_DINCH_100nM_ctrlLPS	0.0447658202378421	0.0942115634073593	SUCLG1	brown	UniprotAccessions-brown_DINCH_4_h_strict_GS4_MM4	8	Cluster 3	P53597	vs_LPS	DINCH	18	1d_DINCH_100nM		brown_DINCH_4_h
3471	1d_DINCH_100nM_ctrlLPS	-0.0103073054493524	0.578785810713333	EIF3E	brown	UniprotAccessions-brown_DINCH_4_h_strict_GS4_MM4	28	Cluster 3	P60228	vs_LPS	DINCH	18	1d_DINCH_100nM		brown_DINCH_4_h
3481	1d_DINCH_100nM_ctrlLPS	0.0418906677027893	0.147089895457392	RAC1	brown	UniprotAccessions-brown_DINCH_4_h_strict_GS4_MM4	15	Cluster 3	P63000	vs_LPS	DINCH	18	1d_DINCH_100nM		brown_DINCH_4_h
3491	1d_DINCH_100nM_ctrlLPS	-0.217676352420979	0.00136097898386491	RAE1	brown	UniprotAccessions-brown_DINCH_4_h_strict_GS4_MM4	26	Cluster 3	P78406	vs_LPS	DINCH	18	1d_DINCH_100nM	**	brown_DINCH_4_h
3501	1d_DINCH_100nM_ctrlLPS	-0.00972193014268026	0.84098276408012	ALDH6A1	brown	UniprotAccessions-brown_DINCH_4_h_strict_GS4_MM4	30	Cluster 3	Q02252	vs_LPS	DINCH	18	1d_DINCH_100nM		brown_DINCH_4_h
3517	1d_DINCH_100nM_ctrlLPS	-0.276106162934931	0.00298896254257776	NUP160	brown	UniprotAccessions-brown_DINCH_4_h_strict_GS4_MM4	23	Cluster 3	Q12769	vs_LPS	DINCH	18	1d_DINCH_100nM	**	brown_DINCH_4_h
3521	1d_DINCH_100nM_ctrlLPS	-0.0554027049684155	0.292287745838699	MAVS	brown	UniprotAccessions-brown_DINCH_4_h_strict_GS4_MM4	25	Cluster 1	Q7Z434	vs_LPS	DINCH	18	1d_DINCH_100nM		brown_DINCH_4_h
3531	1d_DINCH_100nM_ctrlLPS	0.0274809277646251	0.53074843996448	ITPRIP	brown	UniprotAccessions-brown_DINCH_4_h_strict_GS4_MM4	2	Cluster 2	Q8IWB1	vs_LPS	DINCH	18	1d_DINCH_100nM		brown_DINCH_4_h
3541	1d_DINCH_100nM_ctrlLPS	-0.00528134689737519	0.756463120588233	TUBB6	brown	UniprotAccessions-brown_DINCH_4_h_strict_GS4_MM4	27	Cluster 3	Q9BUF5	vs_LPS	DINCH	18	1d_DINCH_100nM		brown_DINCH_4_h
3551	1d_DINCH_100nM_ctrlLPS	-0.00916449053433894	0.812205820733237	BOLA2	brown	UniprotAccessions-brown_DINCH_4_h_strict_GS4_MM4	3	Cluster 2	Q9H3K6	vs_LPS	DINCH	18	1d_DINCH_100nM		brown_DINCH_4_h
3561	1d_DINCH_100nM_ctrlLPS	-0.0426294995278498	0.0117101085055844	RRAGC	brown	UniprotAccessions-brown_DINCH_4_h_strict_GS4_MM4	32	Cluster 2	Q9HB90	vs_LPS	DINCH	18	1d_DINCH_100nM	*	brown_DINCH_4_h
3571	1d_DINCH_100nM_ctrlLPS	0.0970333123405869	0.00503496910453357	OSGEP	brown	UniprotAccessions-brown_DINCH_4_h_strict_GS4_MM4	6	Cluster 2	Q9NPF4	vs_LPS	DINCH	18	1d_DINCH_100nM	**	brown_DINCH_4_h
3581	1d_DINCH_100nM_ctrlLPS	0.0340739765722206	0.389001503630248	BABAM2	brown	UniprotAccessions-brown_DINCH_4_h_strict_GS4_MM4	22	Cluster 2	Q9NXR7	vs_LPS	DINCH	18	1d_DINCH_100nM		brown_DINCH_4_h
3591	1d_DINCH_100nM_ctrlLPS	-0.029687624819679	0.396764772875354	SWAP70	brown	UniprotAccessions-brown_DINCH_4_h_strict_GS4_MM4	9	Cluster 1	Q9UH65	vs_LPS	DINCH	18	1d_DINCH_100nM		brown_DINCH_4_h
3601	1d_DINCH_100nM_ctrlLPS	0.0187825448044161	0.706983723436847	CYB5R1	brown	UniprotAccessions-brown_DINCH_4_h_strict_GS4_MM4	1	Cluster 2	Q9UHQ9	vs_LPS	DINCH	18	1d_DINCH_100nM		brown_DINCH_4_h
3617	1d_DINCH_100nM_ctrlLPS	-0.0328783869804296	0.210927906879082	FAF1	brown	UniprotAccessions-brown_DINCH_4_h_strict_GS4_MM4	33	Cluster 3	Q9UNN5	vs_LPS	DINCH	18	1d_DINCH_100nM		brown_DINCH_4_h
3621	1d_DINCH_100nM_ctrlLPS	-0.151532104014686	0.000401904796402568	TRAPPC4	brown	UniprotAccessions-brown_DINCH_4_h_strict_GS4_MM4	12	Cluster 2	Q9Y296	vs_LPS	DINCH	18	1d_DINCH_100nM	***	brown_DINCH_4_h
3631	1d_DINCH_100nM_ctrlLPS	0.00614871186896551	0.940148491919619	WBP11	brown	UniprotAccessions-brown_DINCH_4_h_strict_GS4_MM4	29	Cluster 1	Q9Y2W2	vs_LPS	DINCH	18	1d_DINCH_100nM		brown_DINCH_4_h
2981	1d_DINCH_1000nM_ctrlLPS	0.0581508275748903	0.684698904617771	APOOL	brown	UniprotAccessions-brown_DINCH_4_h_strict_GS4_MM4	4	Cluster 1	A0A087WUX8	vs_LPS	DINCH	19	1d_DINCH_1000nM		brown_DINCH_4_h
2991	1d_DINCH_1000nM_ctrlLPS	0.146798783607813	0.218228662948342	PVR	brown	UniprotAccessions-brown_DINCH_4_h_strict_GS4_MM4	14	Cluster 2	A0A0A0MSA9	vs_LPS	DINCH	19	1d_DINCH_1000nM		brown_DINCH_4_h
3001	1d_DINCH_1000nM_ctrlLPS	0.067692257210467	0.688629443426459	BTAF1	brown	UniprotAccessions-brown_DINCH_4_h_strict_GS4_MM4	18	Cluster 2	A0A0A0MTH9	vs_LPS	DINCH	19	1d_DINCH_1000nM		brown_DINCH_4_h
3017	1d_DINCH_1000nM_ctrlLPS	0.00830057999826929	0.685171842909928	NRDC	brown	UniprotAccessions-brown_DINCH_4_h_strict_GS4_MM4	10	Cluster 3	B1AKJ5	vs_LPS	DINCH	19	1d_DINCH_1000nM		brown_DINCH_4_h
3021	1d_DINCH_1000nM_ctrlLPS	0.0183662816271671	0.425950906707582	ILF2	brown	UniprotAccessions-brown_DINCH_4_h_strict_GS4_MM4	31	Cluster 3	B4DY09	vs_LPS	DINCH	19	1d_DINCH_1000nM		brown_DINCH_4_h
3031	1d_DINCH_1000nM_ctrlLPS	NA	NA	RFT1	brown	UniprotAccessions-brown_DINCH_4_h_strict_GS4_MM4	11	Cluster 1	B5MDE0	vs_LPS	DINCH	19	1d_DINCH_1000nM		brown_DINCH_4_h
3041	1d_DINCH_1000nM_ctrlLPS	-0.0386090387750398	0.568302467256567	PAIP1	brown	UniprotAccessions-brown_DINCH_4_h_strict_GS4_MM4	16	Cluster 3	D6REB4	vs_LPS	DINCH	19	1d_DINCH_1000nM		brown_DINCH_4_h
3051	1d_DINCH_1000nM_ctrlLPS	0.0280830359764553	0.715090823828529	DENND3	brown	UniprotAccessions-brown_DINCH_4_h_strict_GS4_MM4	17	Cluster 2	E9PF32	vs_LPS	DINCH	19	1d_DINCH_1000nM		brown_DINCH_4_h
3061	1d_DINCH_1000nM_ctrlLPS	-0.0616700536266294	0.767842232211	TYK2	brown	UniprotAccessions-brown_DINCH_4_h_strict_GS4_MM4	24	Cluster 1	E9PM19	vs_LPS	DINCH	19	1d_DINCH_1000nM		brown_DINCH_4_h
3071	1d_DINCH_1000nM_ctrlLPS	-0.0599429423529049	0.355833113567854	RTCA	brown	UniprotAccessions-brown_DINCH_4_h_strict_GS4_MM4	5	Cluster 3	O00442	vs_LPS	DINCH	19	1d_DINCH_1000nM		brown_DINCH_4_h
3081	1d_DINCH_1000nM_ctrlLPS	-0.0699866559189686	0.279109036915721	ZW10	brown	UniprotAccessions-brown_DINCH_4_h_strict_GS4_MM4	20	Cluster 3	O43264	vs_LPS	DINCH	19	1d_DINCH_1000nM		brown_DINCH_4_h
3091	1d_DINCH_1000nM_ctrlLPS	NA	NA	CKMT1A	brown	UniprotAccessions-brown_DINCH_4_h_strict_GS4_MM4	7	Cluster 1	P12532	vs_LPS	DINCH	19	1d_DINCH_1000nM		brown_DINCH_4_h
3107	1d_DINCH_1000nM_ctrlLPS	-0.358302565037314	0.0301018527278908	MIF	brown	UniprotAccessions-brown_DINCH_4_h_strict_GS4_MM4	21	Cluster 4	P14174	vs_LPS	DINCH	19	1d_DINCH_1000nM	*	brown_DINCH_4_h
3117	1d_DINCH_1000nM_ctrlLPS	0.00758133466369307	0.646622253918671	GNPDA1	brown	UniprotAccessions-brown_DINCH_4_h_strict_GS4_MM4	19	Cluster 3	P46926	vs_LPS	DINCH	19	1d_DINCH_1000nM		brown_DINCH_4_h
3121	1d_DINCH_1000nM_ctrlLPS	NA	NA	ALDH3A2	brown	UniprotAccessions-brown_DINCH_4_h_strict_GS4_MM4	13	Cluster 2	P51648	vs_LPS	DINCH	19	1d_DINCH_1000nM		brown_DINCH_4_h
3131	1d_DINCH_1000nM_ctrlLPS	0.0138859581954944	0.655363223915412	SUCLG1	brown	UniprotAccessions-brown_DINCH_4_h_strict_GS4_MM4	8	Cluster 3	P53597	vs_LPS	DINCH	19	1d_DINCH_1000nM		brown_DINCH_4_h
3141	1d_DINCH_1000nM_ctrlLPS	-0.0112036004121512	0.537456964734497	EIF3E	brown	UniprotAccessions-brown_DINCH_4_h_strict_GS4_MM4	28	Cluster 3	P60228	vs_LPS	DINCH	19	1d_DINCH_1000nM		brown_DINCH_4_h
3151	1d_DINCH_1000nM_ctrlLPS	-0.00296988357592792	0.974298457736011	RAC1	brown	UniprotAccessions-brown_DINCH_4_h_strict_GS4_MM4	15	Cluster 3	P63000	vs_LPS	DINCH	19	1d_DINCH_1000nM		brown_DINCH_4_h
3161	1d_DINCH_1000nM_ctrlLPS	-0.0765752808829133	0.334785610113629	RAE1	brown	UniprotAccessions-brown_DINCH_4_h_strict_GS4_MM4	26	Cluster 3	P78406	vs_LPS	DINCH	19	1d_DINCH_1000nM		brown_DINCH_4_h
3171	1d_DINCH_1000nM_ctrlLPS	0.104255257452388	0.000649238352952851	ALDH6A1	brown	UniprotAccessions-brown_DINCH_4_h_strict_GS4_MM4	30	Cluster 3	Q02252	vs_LPS	DINCH	19	1d_DINCH_1000nM	***	brown_DINCH_4_h
3181	1d_DINCH_1000nM_ctrlLPS	-0.123326583423604	0.0958859684108091	NUP160	brown	UniprotAccessions-brown_DINCH_4_h_strict_GS4_MM4	23	Cluster 3	Q12769	vs_LPS	DINCH	19	1d_DINCH_1000nM		brown_DINCH_4_h
3191	1d_DINCH_1000nM_ctrlLPS	-0.135674368036979	0.206901217355332	MAVS	brown	UniprotAccessions-brown_DINCH_4_h_strict_GS4_MM4	25	Cluster 1	Q7Z434	vs_LPS	DINCH	19	1d_DINCH_1000nM		brown_DINCH_4_h
3201	1d_DINCH_1000nM_ctrlLPS	0.16418174497646	0.00827988004954746	ITPRIP	brown	UniprotAccessions-brown_DINCH_4_h_strict_GS4_MM4	2	Cluster 2	Q8IWB1	vs_LPS	DINCH	19	1d_DINCH_1000nM	**	brown_DINCH_4_h
3217	1d_DINCH_1000nM_ctrlLPS	-0.0328963620729245	0.0127774307644723	TUBB6	brown	UniprotAccessions-brown_DINCH_4_h_strict_GS4_MM4	27	Cluster 3	Q9BUF5	vs_LPS	DINCH	19	1d_DINCH_1000nM	*	brown_DINCH_4_h
3221	1d_DINCH_1000nM_ctrlLPS	-0.115159230527358	0.0790205884183737	BOLA2	brown	UniprotAccessions-brown_DINCH_4_h_strict_GS4_MM4	3	Cluster 2	Q9H3K6	vs_LPS	DINCH	19	1d_DINCH_1000nM		brown_DINCH_4_h
3231	1d_DINCH_1000nM_ctrlLPS	-0.0841973918489594	0.341570798125992	RRAGC	brown	UniprotAccessions-brown_DINCH_4_h_strict_GS4_MM4	32	Cluster 2	Q9HB90	vs_LPS	DINCH	19	1d_DINCH_1000nM		brown_DINCH_4_h
3241	1d_DINCH_1000nM_ctrlLPS	0.0126401077753657	0.889452347258892	OSGEP	brown	UniprotAccessions-brown_DINCH_4_h_strict_GS4_MM4	6	Cluster 2	Q9NPF4	vs_LPS	DINCH	19	1d_DINCH_1000nM		brown_DINCH_4_h
3251	1d_DINCH_1000nM_ctrlLPS	0.11250082626158	0.186625846455902	BABAM2	brown	UniprotAccessions-brown_DINCH_4_h_strict_GS4_MM4	22	Cluster 2	Q9NXR7	vs_LPS	DINCH	19	1d_DINCH_1000nM		brown_DINCH_4_h
3261	1d_DINCH_1000nM_ctrlLPS	0.0180912127053416	0.497462515068114	SWAP70	brown	UniprotAccessions-brown_DINCH_4_h_strict_GS4_MM4	9	Cluster 1	Q9UH65	vs_LPS	DINCH	19	1d_DINCH_1000nM		brown_DINCH_4_h
3271	1d_DINCH_1000nM_ctrlLPS	0.0221686024629453	0.776188290814503	CYB5R1	brown	UniprotAccessions-brown_DINCH_4_h_strict_GS4_MM4	1	Cluster 2	Q9UHQ9	vs_LPS	DINCH	19	1d_DINCH_1000nM		brown_DINCH_4_h
3281	1d_DINCH_1000nM_ctrlLPS	0.0107228257951654	0.763176060366373	FAF1	brown	UniprotAccessions-brown_DINCH_4_h_strict_GS4_MM4	33	Cluster 3	Q9UNN5	vs_LPS	DINCH	19	1d_DINCH_1000nM		brown_DINCH_4_h
3291	1d_DINCH_1000nM_ctrlLPS	-0.195002755017976	0.165921187549579	TRAPPC4	brown	UniprotAccessions-brown_DINCH_4_h_strict_GS4_MM4	12	Cluster 2	Q9Y296	vs_LPS	DINCH	19	1d_DINCH_1000nM		brown_DINCH_4_h
3301	1d_DINCH_1000nM_ctrlLPS	0.0816499102282181	0.301677694938272	WBP11	brown	UniprotAccessions-brown_DINCH_4_h_strict_GS4_MM4	29	Cluster 1	Q9Y2W2	vs_LPS	DINCH	19	1d_DINCH_1000nM		brown_DINCH_4_h
26510	1d_DINCH_10000nM_ctrlLPS	0.155397818337843	0.23999042325722	APOOL	brown	UniprotAccessions-brown_DINCH_4_h_strict_GS4_MM4	4	Cluster 1	A0A087WUX8	vs_LPS	DINCH	20	1d_DINCH_10000nM		brown_DINCH_4_h
26610	1d_DINCH_10000nM_ctrlLPS	0.115364440567224	0.223734173972306	PVR	brown	UniprotAccessions-brown_DINCH_4_h_strict_GS4_MM4	14	Cluster 2	A0A0A0MSA9	vs_LPS	DINCH	20	1d_DINCH_10000nM		brown_DINCH_4_h
26710	1d_DINCH_10000nM_ctrlLPS	0.0861935872254384	0.205879574740707	BTAF1	brown	UniprotAccessions-brown_DINCH_4_h_strict_GS4_MM4	18	Cluster 2	A0A0A0MTH9	vs_LPS	DINCH	20	1d_DINCH_10000nM		brown_DINCH_4_h
26810	1d_DINCH_10000nM_ctrlLPS	-0.000468581492988829	0.98056209761044	NRDC	brown	UniprotAccessions-brown_DINCH_4_h_strict_GS4_MM4	10	Cluster 3	B1AKJ5	vs_LPS	DINCH	20	1d_DINCH_10000nM		brown_DINCH_4_h
26910	1d_DINCH_10000nM_ctrlLPS	-0.00796633205771125	0.602120745574861	ILF2	brown	UniprotAccessions-brown_DINCH_4_h_strict_GS4_MM4	31	Cluster 3	B4DY09	vs_LPS	DINCH	20	1d_DINCH_10000nM		brown_DINCH_4_h
27010	1d_DINCH_10000nM_ctrlLPS	NA	NA	RFT1	brown	UniprotAccessions-brown_DINCH_4_h_strict_GS4_MM4	11	Cluster 1	B5MDE0	vs_LPS	DINCH	20	1d_DINCH_10000nM		brown_DINCH_4_h
27110	1d_DINCH_10000nM_ctrlLPS	-0.0175906929977641	0.687167931908321	PAIP1	brown	UniprotAccessions-brown_DINCH_4_h_strict_GS4_MM4	16	Cluster 3	D6REB4	vs_LPS	DINCH	20	1d_DINCH_10000nM		brown_DINCH_4_h
27210	1d_DINCH_10000nM_ctrlLPS	-0.0355599263746787	0.639837334608434	DENND3	brown	UniprotAccessions-brown_DINCH_4_h_strict_GS4_MM4	17	Cluster 2	E9PF32	vs_LPS	DINCH	20	1d_DINCH_10000nM		brown_DINCH_4_h
27310	1d_DINCH_10000nM_ctrlLPS	0.0164421006038277	0.911366484201725	TYK2	brown	UniprotAccessions-brown_DINCH_4_h_strict_GS4_MM4	24	Cluster 1	E9PM19	vs_LPS	DINCH	20	1d_DINCH_10000nM		brown_DINCH_4_h
27410	1d_DINCH_10000nM_ctrlLPS	-0.00180255618240458	0.896485020192358	RTCA	brown	UniprotAccessions-brown_DINCH_4_h_strict_GS4_MM4	5	Cluster 3	O00442	vs_LPS	DINCH	20	1d_DINCH_10000nM		brown_DINCH_4_h
27510	1d_DINCH_10000nM_ctrlLPS	-0.0410085247804329	0.583881226231473	ZW10	brown	UniprotAccessions-brown_DINCH_4_h_strict_GS4_MM4	20	Cluster 3	O43264	vs_LPS	DINCH	20	1d_DINCH_10000nM		brown_DINCH_4_h
27610	1d_DINCH_10000nM_ctrlLPS	NA	NA	CKMT1A	brown	UniprotAccessions-brown_DINCH_4_h_strict_GS4_MM4	7	Cluster 1	P12532	vs_LPS	DINCH	20	1d_DINCH_10000nM		brown_DINCH_4_h
2775	1d_DINCH_10000nM_ctrlLPS	-0.0853227248957996	0.457888517566183	MIF	brown	UniprotAccessions-brown_DINCH_4_h_strict_GS4_MM4	21	Cluster 4	P14174	vs_LPS	DINCH	20	1d_DINCH_10000nM		brown_DINCH_4_h
2781	1d_DINCH_10000nM_ctrlLPS	0.015355321928643	0.384777240719564	GNPDA1	brown	UniprotAccessions-brown_DINCH_4_h_strict_GS4_MM4	19	Cluster 3	P46926	vs_LPS	DINCH	20	1d_DINCH_10000nM		brown_DINCH_4_h
2791	1d_DINCH_10000nM_ctrlLPS	NA	NA	ALDH3A2	brown	UniprotAccessions-brown_DINCH_4_h_strict_GS4_MM4	13	Cluster 2	P51648	vs_LPS	DINCH	20	1d_DINCH_10000nM		brown_DINCH_4_h
2801	1d_DINCH_10000nM_ctrlLPS	-0.0104432679740724	0.472080058325211	SUCLG1	brown	UniprotAccessions-brown_DINCH_4_h_strict_GS4_MM4	8	Cluster 3	P53597	vs_LPS	DINCH	20	1d_DINCH_10000nM		brown_DINCH_4_h
2817	1d_DINCH_10000nM_ctrlLPS	-0.00672276774008883	0.830855275619626	EIF3E	brown	UniprotAccessions-brown_DINCH_4_h_strict_GS4_MM4	28	Cluster 3	P60228	vs_LPS	DINCH	20	1d_DINCH_10000nM		brown_DINCH_4_h
2821	1d_DINCH_10000nM_ctrlLPS	-0.0578813575854959	0.278201875620084	RAC1	brown	UniprotAccessions-brown_DINCH_4_h_strict_GS4_MM4	15	Cluster 3	P63000	vs_LPS	DINCH	20	1d_DINCH_10000nM		brown_DINCH_4_h
2831	1d_DINCH_10000nM_ctrlLPS	-0.0540091933442457	0.325985435495348	RAE1	brown	UniprotAccessions-brown_DINCH_4_h_strict_GS4_MM4	26	Cluster 3	P78406	vs_LPS	DINCH	20	1d_DINCH_10000nM		brown_DINCH_4_h
2841	1d_DINCH_10000nM_ctrlLPS	0.0506264317008519	0.256002000602389	ALDH6A1	brown	UniprotAccessions-brown_DINCH_4_h_strict_GS4_MM4	30	Cluster 3	Q02252	vs_LPS	DINCH	20	1d_DINCH_10000nM		brown_DINCH_4_h
2851	1d_DINCH_10000nM_ctrlLPS	0.0486385007320421	0.477062432909187	NUP160	brown	UniprotAccessions-brown_DINCH_4_h_strict_GS4_MM4	23	Cluster 3	Q12769	vs_LPS	DINCH	20	1d_DINCH_10000nM		brown_DINCH_4_h
2861	1d_DINCH_10000nM_ctrlLPS	-0.0799733785699972	0.00884250025800115	MAVS	brown	UniprotAccessions-brown_DINCH_4_h_strict_GS4_MM4	25	Cluster 1	Q7Z434	vs_LPS	DINCH	20	1d_DINCH_10000nM	**	brown_DINCH_4_h
2871	1d_DINCH_10000nM_ctrlLPS	0.0832956569253922	0.232717744139723	ITPRIP	brown	UniprotAccessions-brown_DINCH_4_h_strict_GS4_MM4	2	Cluster 2	Q8IWB1	vs_LPS	DINCH	20	1d_DINCH_10000nM		brown_DINCH_4_h
2881	1d_DINCH_10000nM_ctrlLPS	0.0528522819103501	0.160578937093	TUBB6	brown	UniprotAccessions-brown_DINCH_4_h_strict_GS4_MM4	27	Cluster 3	Q9BUF5	vs_LPS	DINCH	20	1d_DINCH_10000nM		brown_DINCH_4_h
2891	1d_DINCH_10000nM_ctrlLPS	0.0150583138868338	0.823937365420137	BOLA2	brown	UniprotAccessions-brown_DINCH_4_h_strict_GS4_MM4	3	Cluster 2	Q9H3K6	vs_LPS	DINCH	20	1d_DINCH_10000nM		brown_DINCH_4_h
2901	1d_DINCH_10000nM_ctrlLPS	0.00851684094591358	0.856835440055013	RRAGC	brown	UniprotAccessions-brown_DINCH_4_h_strict_GS4_MM4	32	Cluster 2	Q9HB90	vs_LPS	DINCH	20	1d_DINCH_10000nM		brown_DINCH_4_h
2917	1d_DINCH_10000nM_ctrlLPS	0.114053587069232	0.12988067513209	OSGEP	brown	UniprotAccessions-brown_DINCH_4_h_strict_GS4_MM4	6	Cluster 2	Q9NPF4	vs_LPS	DINCH	20	1d_DINCH_10000nM		brown_DINCH_4_h
2921	1d_DINCH_10000nM_ctrlLPS	0.0783554329007147	0.295437850692202	BABAM2	brown	UniprotAccessions-brown_DINCH_4_h_strict_GS4_MM4	22	Cluster 2	Q9NXR7	vs_LPS	DINCH	20	1d_DINCH_10000nM		brown_DINCH_4_h
2931	1d_DINCH_10000nM_ctrlLPS	-0.0105087996863715	0.660623175506981	SWAP70	brown	UniprotAccessions-brown_DINCH_4_h_strict_GS4_MM4	9	Cluster 1	Q9UH65	vs_LPS	DINCH	20	1d_DINCH_10000nM		brown_DINCH_4_h
2941	1d_DINCH_10000nM_ctrlLPS	0.0202285226365331	0.566275323066472	CYB5R1	brown	UniprotAccessions-brown_DINCH_4_h_strict_GS4_MM4	1	Cluster 2	Q9UHQ9	vs_LPS	DINCH	20	1d_DINCH_10000nM		brown_DINCH_4_h
2951	1d_DINCH_10000nM_ctrlLPS	-0.00537859516353284	0.823133199727969	FAF1	brown	UniprotAccessions-brown_DINCH_4_h_strict_GS4_MM4	33	Cluster 3	Q9UNN5	vs_LPS	DINCH	20	1d_DINCH_10000nM		brown_DINCH_4_h
2961	1d_DINCH_10000nM_ctrlLPS	-0.231716462945877	0.112288688550362	TRAPPC4	brown	UniprotAccessions-brown_DINCH_4_h_strict_GS4_MM4	12	Cluster 2	Q9Y296	vs_LPS	DINCH	20	1d_DINCH_10000nM		brown_DINCH_4_h
2971	1d_DINCH_10000nM_ctrlLPS	0.0727047474482551	0.543661902976591	WBP11	brown	UniprotAccessions-brown_DINCH_4_h_strict_GS4_MM4	29	Cluster 1	Q9Y2W2	vs_LPS	DINCH	20	1d_DINCH_10000nM		brown_DINCH_4_h
496	1d_MINCH_10nM_ctrlLPS	0.136430568490169	0.234787928880623	APOOL	brown	UniprotAccessions-brown_DINCH_4_h_strict_GS4_MM4	4	Cluster 1	A0A087WUX8	vs_LPS	MINCH	21	1d_MINCH_10nM		brown_DINCH_4_h
497	1d_MINCH_10nM_ctrlLPS	0.12374330044271	0.242969206768426	PVR	brown	UniprotAccessions-brown_DINCH_4_h_strict_GS4_MM4	14	Cluster 2	A0A0A0MSA9	vs_LPS	MINCH	21	1d_MINCH_10nM		brown_DINCH_4_h
498	1d_MINCH_10nM_ctrlLPS	-0.176434781876581	0.252379412738828	BTAF1	brown	UniprotAccessions-brown_DINCH_4_h_strict_GS4_MM4	18	Cluster 2	A0A0A0MTH9	vs_LPS	MINCH	21	1d_MINCH_10nM		brown_DINCH_4_h
499	1d_MINCH_10nM_ctrlLPS	0.0673557645651065	0.0117292334610296	NRDC	brown	UniprotAccessions-brown_DINCH_4_h_strict_GS4_MM4	10	Cluster 3	B1AKJ5	vs_LPS	MINCH	21	1d_MINCH_10nM	*	brown_DINCH_4_h
500	1d_MINCH_10nM_ctrlLPS	-0.109000166677241	2.92302201258514e-06	ILF2	brown	UniprotAccessions-brown_DINCH_4_h_strict_GS4_MM4	31	Cluster 3	B4DY09	vs_LPS	MINCH	21	1d_MINCH_10nM	***	brown_DINCH_4_h
501	1d_MINCH_10nM_ctrlLPS	NA	NA	RFT1	brown	UniprotAccessions-brown_DINCH_4_h_strict_GS4_MM4	11	Cluster 1	B5MDE0	vs_LPS	MINCH	21	1d_MINCH_10nM		brown_DINCH_4_h
502	1d_MINCH_10nM_ctrlLPS	-0.135085306962401	0.289760329524212	PAIP1	brown	UniprotAccessions-brown_DINCH_4_h_strict_GS4_MM4	16	Cluster 3	D6REB4	vs_LPS	MINCH	21	1d_MINCH_10nM		brown_DINCH_4_h
503	1d_MINCH_10nM_ctrlLPS	0.0594938781883566	0.345568674926667	DENND3	brown	UniprotAccessions-brown_DINCH_4_h_strict_GS4_MM4	17	Cluster 2	E9PF32	vs_LPS	MINCH	21	1d_MINCH_10nM		brown_DINCH_4_h
504	1d_MINCH_10nM_ctrlLPS	-0.0253861503887215	0.799317750503398	TYK2	brown	UniprotAccessions-brown_DINCH_4_h_strict_GS4_MM4	24	Cluster 1	E9PM19	vs_LPS	MINCH	21	1d_MINCH_10nM		brown_DINCH_4_h
505	1d_MINCH_10nM_ctrlLPS	-0.0781903692563235	0.303429586511439	RTCA	brown	UniprotAccessions-brown_DINCH_4_h_strict_GS4_MM4	5	Cluster 3	O00442	vs_LPS	MINCH	21	1d_MINCH_10nM		brown_DINCH_4_h
506	1d_MINCH_10nM_ctrlLPS	-0.0151889550284004	0.69904639217297	ZW10	brown	UniprotAccessions-brown_DINCH_4_h_strict_GS4_MM4	20	Cluster 3	O43264	vs_LPS	MINCH	21	1d_MINCH_10nM		brown_DINCH_4_h
507	1d_MINCH_10nM_ctrlLPS	NA	NA	CKMT1A	brown	UniprotAccessions-brown_DINCH_4_h_strict_GS4_MM4	7	Cluster 1	P12532	vs_LPS	MINCH	21	1d_MINCH_10nM		brown_DINCH_4_h
508	1d_MINCH_10nM_ctrlLPS	-0.250296047076166	0.0862856156894541	MIF	brown	UniprotAccessions-brown_DINCH_4_h_strict_GS4_MM4	21	Cluster 4	P14174	vs_LPS	MINCH	21	1d_MINCH_10nM		brown_DINCH_4_h
509	1d_MINCH_10nM_ctrlLPS	0.0507765832868407	0.189505061685048	GNPDA1	brown	UniprotAccessions-brown_DINCH_4_h_strict_GS4_MM4	19	Cluster 3	P46926	vs_LPS	MINCH	21	1d_MINCH_10nM		brown_DINCH_4_h
510	1d_MINCH_10nM_ctrlLPS	NA	NA	ALDH3A2	brown	UniprotAccessions-brown_DINCH_4_h_strict_GS4_MM4	13	Cluster 2	P51648	vs_LPS	MINCH	21	1d_MINCH_10nM		brown_DINCH_4_h
511	1d_MINCH_10nM_ctrlLPS	0.0452497085905501	0.0664081230621398	SUCLG1	brown	UniprotAccessions-brown_DINCH_4_h_strict_GS4_MM4	8	Cluster 3	P53597	vs_LPS	MINCH	21	1d_MINCH_10nM		brown_DINCH_4_h
512	1d_MINCH_10nM_ctrlLPS	-0.00647982997638998	0.499368859850172	EIF3E	brown	UniprotAccessions-brown_DINCH_4_h_strict_GS4_MM4	28	Cluster 3	P60228	vs_LPS	MINCH	21	1d_MINCH_10nM		brown_DINCH_4_h
513	1d_MINCH_10nM_ctrlLPS	0.0224357059510011	0.819594484285939	RAC1	brown	UniprotAccessions-brown_DINCH_4_h_strict_GS4_MM4	15	Cluster 3	P63000	vs_LPS	MINCH	21	1d_MINCH_10nM		brown_DINCH_4_h
514	1d_MINCH_10nM_ctrlLPS	-0.327582648289175	0.0182326734695969	RAE1	brown	UniprotAccessions-brown_DINCH_4_h_strict_GS4_MM4	26	Cluster 3	P78406	vs_LPS	MINCH	21	1d_MINCH_10nM	*	brown_DINCH_4_h
515	1d_MINCH_10nM_ctrlLPS	0.0898198859302993	0.0113714460804629	ALDH6A1	brown	UniprotAccessions-brown_DINCH_4_h_strict_GS4_MM4	30	Cluster 3	Q02252	vs_LPS	MINCH	21	1d_MINCH_10nM	*	brown_DINCH_4_h
516	1d_MINCH_10nM_ctrlLPS	-0.297941473725521	0.0139732708488873	NUP160	brown	UniprotAccessions-brown_DINCH_4_h_strict_GS4_MM4	23	Cluster 3	Q12769	vs_LPS	MINCH	21	1d_MINCH_10nM	*	brown_DINCH_4_h
517	1d_MINCH_10nM_ctrlLPS	-0.191145925039384	0.080090701748026	MAVS	brown	UniprotAccessions-brown_DINCH_4_h_strict_GS4_MM4	25	Cluster 1	Q7Z434	vs_LPS	MINCH	21	1d_MINCH_10nM		brown_DINCH_4_h
518	1d_MINCH_10nM_ctrlLPS	0.103892406013896	0.048461613071777	ITPRIP	brown	UniprotAccessions-brown_DINCH_4_h_strict_GS4_MM4	2	Cluster 2	Q8IWB1	vs_LPS	MINCH	21	1d_MINCH_10nM	*	brown_DINCH_4_h
519	1d_MINCH_10nM_ctrlLPS	-0.0366333169719768	0.105899534004986	TUBB6	brown	UniprotAccessions-brown_DINCH_4_h_strict_GS4_MM4	27	Cluster 3	Q9BUF5	vs_LPS	MINCH	21	1d_MINCH_10nM		brown_DINCH_4_h
520	1d_MINCH_10nM_ctrlLPS	0.213806253522068	0.162443523489849	BOLA2	brown	UniprotAccessions-brown_DINCH_4_h_strict_GS4_MM4	3	Cluster 2	Q9H3K6	vs_LPS	MINCH	21	1d_MINCH_10nM		brown_DINCH_4_h
521	1d_MINCH_10nM_ctrlLPS	-0.0441079729088284	0.651386742946538	RRAGC	brown	UniprotAccessions-brown_DINCH_4_h_strict_GS4_MM4	32	Cluster 2	Q9HB90	vs_LPS	MINCH	21	1d_MINCH_10nM		brown_DINCH_4_h
522	1d_MINCH_10nM_ctrlLPS	0.148202869780145	0.132566739788426	OSGEP	brown	UniprotAccessions-brown_DINCH_4_h_strict_GS4_MM4	6	Cluster 2	Q9NPF4	vs_LPS	MINCH	21	1d_MINCH_10nM		brown_DINCH_4_h
523	1d_MINCH_10nM_ctrlLPS	0.0802183078167126	0.401425756578537	BABAM2	brown	UniprotAccessions-brown_DINCH_4_h_strict_GS4_MM4	22	Cluster 2	Q9NXR7	vs_LPS	MINCH	21	1d_MINCH_10nM		brown_DINCH_4_h
524	1d_MINCH_10nM_ctrlLPS	-0.0108171210534418	0.613721986143312	SWAP70	brown	UniprotAccessions-brown_DINCH_4_h_strict_GS4_MM4	9	Cluster 1	Q9UH65	vs_LPS	MINCH	21	1d_MINCH_10nM		brown_DINCH_4_h
525	1d_MINCH_10nM_ctrlLPS	0.0705153361631805	0.533553486715112	CYB5R1	brown	UniprotAccessions-brown_DINCH_4_h_strict_GS4_MM4	1	Cluster 2	Q9UHQ9	vs_LPS	MINCH	21	1d_MINCH_10nM		brown_DINCH_4_h
526	1d_MINCH_10nM_ctrlLPS	-0.0184410403274138	0.517801166706005	FAF1	brown	UniprotAccessions-brown_DINCH_4_h_strict_GS4_MM4	33	Cluster 3	Q9UNN5	vs_LPS	MINCH	21	1d_MINCH_10nM		brown_DINCH_4_h
527	1d_MINCH_10nM_ctrlLPS	-0.294756526942538	0.0011401843160137	TRAPPC4	brown	UniprotAccessions-brown_DINCH_4_h_strict_GS4_MM4	12	Cluster 2	Q9Y296	vs_LPS	MINCH	21	1d_MINCH_10nM	**	brown_DINCH_4_h
528	1d_MINCH_10nM_ctrlLPS	0.232725923597718	0.0451043367182048	WBP11	brown	UniprotAccessions-brown_DINCH_4_h_strict_GS4_MM4	29	Cluster 1	Q9Y2W2	vs_LPS	MINCH	21	1d_MINCH_10nM	*	brown_DINCH_4_h
463	1d_MINCH_100nM_ctrlLPS	0.0678714078393345	0.112125504195914	APOOL	brown	UniprotAccessions-brown_DINCH_4_h_strict_GS4_MM4	4	Cluster 1	A0A087WUX8	vs_LPS	MINCH	22	1d_MINCH_100nM		brown_DINCH_4_h
464	1d_MINCH_100nM_ctrlLPS	0.114634220606013	0.0507838712530956	PVR	brown	UniprotAccessions-brown_DINCH_4_h_strict_GS4_MM4	14	Cluster 2	A0A0A0MSA9	vs_LPS	MINCH	22	1d_MINCH_100nM		brown_DINCH_4_h
465	1d_MINCH_100nM_ctrlLPS	-0.00270447587330691	0.982357805420046	BTAF1	brown	UniprotAccessions-brown_DINCH_4_h_strict_GS4_MM4	18	Cluster 2	A0A0A0MTH9	vs_LPS	MINCH	22	1d_MINCH_100nM		brown_DINCH_4_h
466	1d_MINCH_100nM_ctrlLPS	0.0166577781518731	0.363876107066778	NRDC	brown	UniprotAccessions-brown_DINCH_4_h_strict_GS4_MM4	10	Cluster 3	B1AKJ5	vs_LPS	MINCH	22	1d_MINCH_100nM		brown_DINCH_4_h
467	1d_MINCH_100nM_ctrlLPS	-0.0592515760642012	0.0584222206984965	ILF2	brown	UniprotAccessions-brown_DINCH_4_h_strict_GS4_MM4	31	Cluster 3	B4DY09	vs_LPS	MINCH	22	1d_MINCH_100nM		brown_DINCH_4_h
468	1d_MINCH_100nM_ctrlLPS	NA	NA	RFT1	brown	UniprotAccessions-brown_DINCH_4_h_strict_GS4_MM4	11	Cluster 1	B5MDE0	vs_LPS	MINCH	22	1d_MINCH_100nM		brown_DINCH_4_h
469	1d_MINCH_100nM_ctrlLPS	-0.15303576970345	0.0100080124706698	PAIP1	brown	UniprotAccessions-brown_DINCH_4_h_strict_GS4_MM4	16	Cluster 3	D6REB4	vs_LPS	MINCH	22	1d_MINCH_100nM	*	brown_DINCH_4_h
470	1d_MINCH_100nM_ctrlLPS	0.0602061711275201	0.244963669224383	DENND3	brown	UniprotAccessions-brown_DINCH_4_h_strict_GS4_MM4	17	Cluster 2	E9PF32	vs_LPS	MINCH	22	1d_MINCH_100nM		brown_DINCH_4_h
471	1d_MINCH_100nM_ctrlLPS	0.079155633212035	0.202300976201461	TYK2	brown	UniprotAccessions-brown_DINCH_4_h_strict_GS4_MM4	24	Cluster 1	E9PM19	vs_LPS	MINCH	22	1d_MINCH_100nM		brown_DINCH_4_h
472	1d_MINCH_100nM_ctrlLPS	-0.0640687365096981	0.0944217594589901	RTCA	brown	UniprotAccessions-brown_DINCH_4_h_strict_GS4_MM4	5	Cluster 3	O00442	vs_LPS	MINCH	22	1d_MINCH_100nM		brown_DINCH_4_h
473	1d_MINCH_100nM_ctrlLPS	-0.0426600235268438	0.633951657946044	ZW10	brown	UniprotAccessions-brown_DINCH_4_h_strict_GS4_MM4	20	Cluster 3	O43264	vs_LPS	MINCH	22	1d_MINCH_100nM		brown_DINCH_4_h
474	1d_MINCH_100nM_ctrlLPS	NA	NA	CKMT1A	brown	UniprotAccessions-brown_DINCH_4_h_strict_GS4_MM4	7	Cluster 1	P12532	vs_LPS	MINCH	22	1d_MINCH_100nM		brown_DINCH_4_h
475	1d_MINCH_100nM_ctrlLPS	-0.325892121902531	0.00112546448733586	MIF	brown	UniprotAccessions-brown_DINCH_4_h_strict_GS4_MM4	21	Cluster 4	P14174	vs_LPS	MINCH	22	1d_MINCH_100nM	**	brown_DINCH_4_h
476	1d_MINCH_100nM_ctrlLPS	0.0133559298933285	0.693515428204392	GNPDA1	brown	UniprotAccessions-brown_DINCH_4_h_strict_GS4_MM4	19	Cluster 3	P46926	vs_LPS	MINCH	22	1d_MINCH_100nM		brown_DINCH_4_h
477	1d_MINCH_100nM_ctrlLPS	NA	NA	ALDH3A2	brown	UniprotAccessions-brown_DINCH_4_h_strict_GS4_MM4	13	Cluster 2	P51648	vs_LPS	MINCH	22	1d_MINCH_100nM		brown_DINCH_4_h
478	1d_MINCH_100nM_ctrlLPS	0.0196640903538587	0.686439927520682	SUCLG1	brown	UniprotAccessions-brown_DINCH_4_h_strict_GS4_MM4	8	Cluster 3	P53597	vs_LPS	MINCH	22	1d_MINCH_100nM		brown_DINCH_4_h
479	1d_MINCH_100nM_ctrlLPS	-0.0198345947121524	0.0631527255135648	EIF3E	brown	UniprotAccessions-brown_DINCH_4_h_strict_GS4_MM4	28	Cluster 3	P60228	vs_LPS	MINCH	22	1d_MINCH_100nM		brown_DINCH_4_h
480	1d_MINCH_100nM_ctrlLPS	-0.0259548434276099	0.347296139891439	RAC1	brown	UniprotAccessions-brown_DINCH_4_h_strict_GS4_MM4	15	Cluster 3	P63000	vs_LPS	MINCH	22	1d_MINCH_100nM		brown_DINCH_4_h
481	1d_MINCH_100nM_ctrlLPS	-0.204257900953814	0.000787901563251473	RAE1	brown	UniprotAccessions-brown_DINCH_4_h_strict_GS4_MM4	26	Cluster 3	P78406	vs_LPS	MINCH	22	1d_MINCH_100nM	***	brown_DINCH_4_h
482	1d_MINCH_100nM_ctrlLPS	0.0469512067887182	0.302019433287198	ALDH6A1	brown	UniprotAccessions-brown_DINCH_4_h_strict_GS4_MM4	30	Cluster 3	Q02252	vs_LPS	MINCH	22	1d_MINCH_100nM		brown_DINCH_4_h
483	1d_MINCH_100nM_ctrlLPS	-0.132740728534514	0.00402073311882752	NUP160	brown	UniprotAccessions-brown_DINCH_4_h_strict_GS4_MM4	23	Cluster 3	Q12769	vs_LPS	MINCH	22	1d_MINCH_100nM	**	brown_DINCH_4_h
484	1d_MINCH_100nM_ctrlLPS	-0.0213239373382905	0.763273076454782	MAVS	brown	UniprotAccessions-brown_DINCH_4_h_strict_GS4_MM4	25	Cluster 1	Q7Z434	vs_LPS	MINCH	22	1d_MINCH_100nM		brown_DINCH_4_h
485	1d_MINCH_100nM_ctrlLPS	0.0517315302663213	0.0969370443318339	ITPRIP	brown	UniprotAccessions-brown_DINCH_4_h_strict_GS4_MM4	2	Cluster 2	Q8IWB1	vs_LPS	MINCH	22	1d_MINCH_100nM		brown_DINCH_4_h
486	1d_MINCH_100nM_ctrlLPS	-0.0089719172406699	0.612932840792568	TUBB6	brown	UniprotAccessions-brown_DINCH_4_h_strict_GS4_MM4	27	Cluster 3	Q9BUF5	vs_LPS	MINCH	22	1d_MINCH_100nM		brown_DINCH_4_h
487	1d_MINCH_100nM_ctrlLPS	0.0930930240701426	0.128427890521054	BOLA2	brown	UniprotAccessions-brown_DINCH_4_h_strict_GS4_MM4	3	Cluster 2	Q9H3K6	vs_LPS	MINCH	22	1d_MINCH_100nM		brown_DINCH_4_h
488	1d_MINCH_100nM_ctrlLPS	-0.0596975824855363	0.264314386607142	RRAGC	brown	UniprotAccessions-brown_DINCH_4_h_strict_GS4_MM4	32	Cluster 2	Q9HB90	vs_LPS	MINCH	22	1d_MINCH_100nM		brown_DINCH_4_h
489	1d_MINCH_100nM_ctrlLPS	0.0925824389755895	0.149230475787661	OSGEP	brown	UniprotAccessions-brown_DINCH_4_h_strict_GS4_MM4	6	Cluster 2	Q9NPF4	vs_LPS	MINCH	22	1d_MINCH_100nM		brown_DINCH_4_h
490	1d_MINCH_100nM_ctrlLPS	0.112025238585722	0.0628581391216466	BABAM2	brown	UniprotAccessions-brown_DINCH_4_h_strict_GS4_MM4	22	Cluster 2	Q9NXR7	vs_LPS	MINCH	22	1d_MINCH_100nM		brown_DINCH_4_h
491	1d_MINCH_100nM_ctrlLPS	-0.0494592249935454	0.241280804953308	SWAP70	brown	UniprotAccessions-brown_DINCH_4_h_strict_GS4_MM4	9	Cluster 1	Q9UH65	vs_LPS	MINCH	22	1d_MINCH_100nM		brown_DINCH_4_h
492	1d_MINCH_100nM_ctrlLPS	0.0152057383523044	0.700758407630366	CYB5R1	brown	UniprotAccessions-brown_DINCH_4_h_strict_GS4_MM4	1	Cluster 2	Q9UHQ9	vs_LPS	MINCH	22	1d_MINCH_100nM		brown_DINCH_4_h
493	1d_MINCH_100nM_ctrlLPS	-0.0178138503860495	0.425433478123519	FAF1	brown	UniprotAccessions-brown_DINCH_4_h_strict_GS4_MM4	33	Cluster 3	Q9UNN5	vs_LPS	MINCH	22	1d_MINCH_100nM		brown_DINCH_4_h
494	1d_MINCH_100nM_ctrlLPS	-0.246129811292796	0.00875580542351843	TRAPPC4	brown	UniprotAccessions-brown_DINCH_4_h_strict_GS4_MM4	12	Cluster 2	Q9Y296	vs_LPS	MINCH	22	1d_MINCH_100nM	**	brown_DINCH_4_h
495	1d_MINCH_100nM_ctrlLPS	0.0116338711592401	0.414005817013566	WBP11	brown	UniprotAccessions-brown_DINCH_4_h_strict_GS4_MM4	29	Cluster 1	Q9Y2W2	vs_LPS	MINCH	22	1d_MINCH_100nM		brown_DINCH_4_h
430	1d_MINCH_1000nM_ctrlLPS	0.168310695793006	0.0507988258400468	APOOL	brown	UniprotAccessions-brown_DINCH_4_h_strict_GS4_MM4	4	Cluster 1	A0A087WUX8	vs_LPS	MINCH	23	1d_MINCH_1000nM		brown_DINCH_4_h
431	1d_MINCH_1000nM_ctrlLPS	0.0756490781212314	0.113968228492956	PVR	brown	UniprotAccessions-brown_DINCH_4_h_strict_GS4_MM4	14	Cluster 2	A0A0A0MSA9	vs_LPS	MINCH	23	1d_MINCH_1000nM		brown_DINCH_4_h
432	1d_MINCH_1000nM_ctrlLPS	-0.209406614436981	0.0749598140192352	BTAF1	brown	UniprotAccessions-brown_DINCH_4_h_strict_GS4_MM4	18	Cluster 2	A0A0A0MTH9	vs_LPS	MINCH	23	1d_MINCH_1000nM		brown_DINCH_4_h
433	1d_MINCH_1000nM_ctrlLPS	0.0156916641764355	0.612635017865527	NRDC	brown	UniprotAccessions-brown_DINCH_4_h_strict_GS4_MM4	10	Cluster 3	B1AKJ5	vs_LPS	MINCH	23	1d_MINCH_1000nM		brown_DINCH_4_h
434	1d_MINCH_1000nM_ctrlLPS	-0.0499951464310382	0.0220524743186342	ILF2	brown	UniprotAccessions-brown_DINCH_4_h_strict_GS4_MM4	31	Cluster 3	B4DY09	vs_LPS	MINCH	23	1d_MINCH_1000nM	*	brown_DINCH_4_h
435	1d_MINCH_1000nM_ctrlLPS	NA	NA	RFT1	brown	UniprotAccessions-brown_DINCH_4_h_strict_GS4_MM4	11	Cluster 1	B5MDE0	vs_LPS	MINCH	23	1d_MINCH_1000nM		brown_DINCH_4_h
436	1d_MINCH_1000nM_ctrlLPS	-0.121192059225018	0.0164717156737203	PAIP1	brown	UniprotAccessions-brown_DINCH_4_h_strict_GS4_MM4	16	Cluster 3	D6REB4	vs_LPS	MINCH	23	1d_MINCH_1000nM	*	brown_DINCH_4_h
437	1d_MINCH_1000nM_ctrlLPS	-0.0353607334142834	0.466075889680778	DENND3	brown	UniprotAccessions-brown_DINCH_4_h_strict_GS4_MM4	17	Cluster 2	E9PF32	vs_LPS	MINCH	23	1d_MINCH_1000nM		brown_DINCH_4_h
438	1d_MINCH_1000nM_ctrlLPS	-0.0742903250412537	0.293953412880158	TYK2	brown	UniprotAccessions-brown_DINCH_4_h_strict_GS4_MM4	24	Cluster 1	E9PM19	vs_LPS	MINCH	23	1d_MINCH_1000nM		brown_DINCH_4_h
439	1d_MINCH_1000nM_ctrlLPS	-0.0684827591585391	0.0608633999600406	RTCA	brown	UniprotAccessions-brown_DINCH_4_h_strict_GS4_MM4	5	Cluster 3	O00442	vs_LPS	MINCH	23	1d_MINCH_1000nM		brown_DINCH_4_h
440	1d_MINCH_1000nM_ctrlLPS	-0.000486449974764772	0.992025357366672	ZW10	brown	UniprotAccessions-brown_DINCH_4_h_strict_GS4_MM4	20	Cluster 3	O43264	vs_LPS	MINCH	23	1d_MINCH_1000nM		brown_DINCH_4_h
441	1d_MINCH_1000nM_ctrlLPS	NA	NA	CKMT1A	brown	UniprotAccessions-brown_DINCH_4_h_strict_GS4_MM4	7	Cluster 1	P12532	vs_LPS	MINCH	23	1d_MINCH_1000nM		brown_DINCH_4_h
442	1d_MINCH_1000nM_ctrlLPS	-0.0454109613074234	0.410176078633541	MIF	brown	UniprotAccessions-brown_DINCH_4_h_strict_GS4_MM4	21	Cluster 4	P14174	vs_LPS	MINCH	23	1d_MINCH_1000nM		brown_DINCH_4_h
443	1d_MINCH_1000nM_ctrlLPS	0.0493685762629903	0.0151400632873759	GNPDA1	brown	UniprotAccessions-brown_DINCH_4_h_strict_GS4_MM4	19	Cluster 3	P46926	vs_LPS	MINCH	23	1d_MINCH_1000nM	*	brown_DINCH_4_h
444	1d_MINCH_1000nM_ctrlLPS	NA	NA	ALDH3A2	brown	UniprotAccessions-brown_DINCH_4_h_strict_GS4_MM4	13	Cluster 2	P51648	vs_LPS	MINCH	23	1d_MINCH_1000nM		brown_DINCH_4_h
445	1d_MINCH_1000nM_ctrlLPS	0.0231758953230038	0.192648825709504	SUCLG1	brown	UniprotAccessions-brown_DINCH_4_h_strict_GS4_MM4	8	Cluster 3	P53597	vs_LPS	MINCH	23	1d_MINCH_1000nM		brown_DINCH_4_h
446	1d_MINCH_1000nM_ctrlLPS	-0.00908217685287079	0.66969573743899	EIF3E	brown	UniprotAccessions-brown_DINCH_4_h_strict_GS4_MM4	28	Cluster 3	P60228	vs_LPS	MINCH	23	1d_MINCH_1000nM		brown_DINCH_4_h
447	1d_MINCH_1000nM_ctrlLPS	0.0466443674127098	0.00927897884970117	RAC1	brown	UniprotAccessions-brown_DINCH_4_h_strict_GS4_MM4	15	Cluster 3	P63000	vs_LPS	MINCH	23	1d_MINCH_1000nM	**	brown_DINCH_4_h
448	1d_MINCH_1000nM_ctrlLPS	-0.144858342649769	0.0156627680431367	RAE1	brown	UniprotAccessions-brown_DINCH_4_h_strict_GS4_MM4	26	Cluster 3	P78406	vs_LPS	MINCH	23	1d_MINCH_1000nM	*	brown_DINCH_4_h
449	1d_MINCH_1000nM_ctrlLPS	0.0872060784069302	9.60870934224628e-05	ALDH6A1	brown	UniprotAccessions-brown_DINCH_4_h_strict_GS4_MM4	30	Cluster 3	Q02252	vs_LPS	MINCH	23	1d_MINCH_1000nM	***	brown_DINCH_4_h
450	1d_MINCH_1000nM_ctrlLPS	-0.137078727375616	0.00042005841725159	NUP160	brown	UniprotAccessions-brown_DINCH_4_h_strict_GS4_MM4	23	Cluster 3	Q12769	vs_LPS	MINCH	23	1d_MINCH_1000nM	***	brown_DINCH_4_h
451	1d_MINCH_1000nM_ctrlLPS	0.0293366165233705	0.314642842728784	MAVS	brown	UniprotAccessions-brown_DINCH_4_h_strict_GS4_MM4	25	Cluster 1	Q7Z434	vs_LPS	MINCH	23	1d_MINCH_1000nM		brown_DINCH_4_h
452	1d_MINCH_1000nM_ctrlLPS	0.0891103919928513	0.125766567964898	ITPRIP	brown	UniprotAccessions-brown_DINCH_4_h_strict_GS4_MM4	2	Cluster 2	Q8IWB1	vs_LPS	MINCH	23	1d_MINCH_1000nM		brown_DINCH_4_h
453	1d_MINCH_1000nM_ctrlLPS	-0.0759291897260012	0.0033013252076357	TUBB6	brown	UniprotAccessions-brown_DINCH_4_h_strict_GS4_MM4	27	Cluster 3	Q9BUF5	vs_LPS	MINCH	23	1d_MINCH_1000nM	**	brown_DINCH_4_h
454	1d_MINCH_1000nM_ctrlLPS	0.266397510954246	0.00598872910271867	BOLA2	brown	UniprotAccessions-brown_DINCH_4_h_strict_GS4_MM4	3	Cluster 2	Q9H3K6	vs_LPS	MINCH	23	1d_MINCH_1000nM	**	brown_DINCH_4_h
455	1d_MINCH_1000nM_ctrlLPS	-0.00358290905277251	0.943999513379373	RRAGC	brown	UniprotAccessions-brown_DINCH_4_h_strict_GS4_MM4	32	Cluster 2	Q9HB90	vs_LPS	MINCH	23	1d_MINCH_1000nM		brown_DINCH_4_h
456	1d_MINCH_1000nM_ctrlLPS	0.227617881457327	0.000676910842159142	OSGEP	brown	UniprotAccessions-brown_DINCH_4_h_strict_GS4_MM4	6	Cluster 2	Q9NPF4	vs_LPS	MINCH	23	1d_MINCH_1000nM	***	brown_DINCH_4_h
457	1d_MINCH_1000nM_ctrlLPS	0.0641506231459499	0.191011776370705	BABAM2	brown	UniprotAccessions-brown_DINCH_4_h_strict_GS4_MM4	22	Cluster 2	Q9NXR7	vs_LPS	MINCH	23	1d_MINCH_1000nM		brown_DINCH_4_h
458	1d_MINCH_1000nM_ctrlLPS	0.0406769187496965	0.012914838761539	SWAP70	brown	UniprotAccessions-brown_DINCH_4_h_strict_GS4_MM4	9	Cluster 1	Q9UH65	vs_LPS	MINCH	23	1d_MINCH_1000nM	*	brown_DINCH_4_h
459	1d_MINCH_1000nM_ctrlLPS	0.0362657099906674	0.564741116512203	CYB5R1	brown	UniprotAccessions-brown_DINCH_4_h_strict_GS4_MM4	1	Cluster 2	Q9UHQ9	vs_LPS	MINCH	23	1d_MINCH_1000nM		brown_DINCH_4_h
460	1d_MINCH_1000nM_ctrlLPS	-0.0605222732326984	0.196423858882387	FAF1	brown	UniprotAccessions-brown_DINCH_4_h_strict_GS4_MM4	33	Cluster 3	Q9UNN5	vs_LPS	MINCH	23	1d_MINCH_1000nM		brown_DINCH_4_h
461	1d_MINCH_1000nM_ctrlLPS	-0.205697095904377	0.0003176185897689	TRAPPC4	brown	UniprotAccessions-brown_DINCH_4_h_strict_GS4_MM4	12	Cluster 2	Q9Y296	vs_LPS	MINCH	23	1d_MINCH_1000nM	***	brown_DINCH_4_h
462	1d_MINCH_1000nM_ctrlLPS	0.285501400547055	0.000284160084477353	WBP11	brown	UniprotAccessions-brown_DINCH_4_h_strict_GS4_MM4	29	Cluster 1	Q9Y2W2	vs_LPS	MINCH	23	1d_MINCH_1000nM	***	brown_DINCH_4_h
3971	1d_MINCH_10000nM_ctrlLPS	0.0726259931636929	0.603398566527272	APOOL	brown	UniprotAccessions-brown_DINCH_4_h_strict_GS4_MM4	4	Cluster 1	A0A087WUX8	vs_LPS	MINCH	24	1d_MINCH_10000nM		brown_DINCH_4_h
3981	1d_MINCH_10000nM_ctrlLPS	0.0417752025690588	0.70708229124686	PVR	brown	UniprotAccessions-brown_DINCH_4_h_strict_GS4_MM4	14	Cluster 2	A0A0A0MSA9	vs_LPS	MINCH	24	1d_MINCH_10000nM		brown_DINCH_4_h
3991	1d_MINCH_10000nM_ctrlLPS	-0.0312437706839126	0.88538697703755	BTAF1	brown	UniprotAccessions-brown_DINCH_4_h_strict_GS4_MM4	18	Cluster 2	A0A0A0MTH9	vs_LPS	MINCH	24	1d_MINCH_10000nM		brown_DINCH_4_h
4001	1d_MINCH_10000nM_ctrlLPS	0.0145199660054018	0.510873074953244	NRDC	brown	UniprotAccessions-brown_DINCH_4_h_strict_GS4_MM4	10	Cluster 3	B1AKJ5	vs_LPS	MINCH	24	1d_MINCH_10000nM		brown_DINCH_4_h
4017	1d_MINCH_10000nM_ctrlLPS	-0.0490873182950788	0.0513025328872302	ILF2	brown	UniprotAccessions-brown_DINCH_4_h_strict_GS4_MM4	31	Cluster 3	B4DY09	vs_LPS	MINCH	24	1d_MINCH_10000nM		brown_DINCH_4_h
4021	1d_MINCH_10000nM_ctrlLPS	NA	NA	RFT1	brown	UniprotAccessions-brown_DINCH_4_h_strict_GS4_MM4	11	Cluster 1	B5MDE0	vs_LPS	MINCH	24	1d_MINCH_10000nM		brown_DINCH_4_h
4031	1d_MINCH_10000nM_ctrlLPS	-0.110173157100961	0.239190453105049	PAIP1	brown	UniprotAccessions-brown_DINCH_4_h_strict_GS4_MM4	16	Cluster 3	D6REB4	vs_LPS	MINCH	24	1d_MINCH_10000nM		brown_DINCH_4_h
4041	1d_MINCH_10000nM_ctrlLPS	0.043521125030372	0.583530588898949	DENND3	brown	UniprotAccessions-brown_DINCH_4_h_strict_GS4_MM4	17	Cluster 2	E9PF32	vs_LPS	MINCH	24	1d_MINCH_10000nM		brown_DINCH_4_h
4051	1d_MINCH_10000nM_ctrlLPS	-0.0292453814605822	0.799693613918394	TYK2	brown	UniprotAccessions-brown_DINCH_4_h_strict_GS4_MM4	24	Cluster 1	E9PM19	vs_LPS	MINCH	24	1d_MINCH_10000nM		brown_DINCH_4_h
4061	1d_MINCH_10000nM_ctrlLPS	-0.128520460570439	0.0899391199789469	RTCA	brown	UniprotAccessions-brown_DINCH_4_h_strict_GS4_MM4	5	Cluster 3	O00442	vs_LPS	MINCH	24	1d_MINCH_10000nM		brown_DINCH_4_h
4071	1d_MINCH_10000nM_ctrlLPS	-0.0059760086705047	0.927056736099875	ZW10	brown	UniprotAccessions-brown_DINCH_4_h_strict_GS4_MM4	20	Cluster 3	O43264	vs_LPS	MINCH	24	1d_MINCH_10000nM		brown_DINCH_4_h
4081	1d_MINCH_10000nM_ctrlLPS	NA	NA	CKMT1A	brown	UniprotAccessions-brown_DINCH_4_h_strict_GS4_MM4	7	Cluster 1	P12532	vs_LPS	MINCH	24	1d_MINCH_10000nM		brown_DINCH_4_h
409	1d_MINCH_10000nM_ctrlLPS	-0.361350089400535	0.105974624336737	MIF	brown	UniprotAccessions-brown_DINCH_4_h_strict_GS4_MM4	21	Cluster 4	P14174	vs_LPS	MINCH	24	1d_MINCH_10000nM		brown_DINCH_4_h
410	1d_MINCH_10000nM_ctrlLPS	0.0406684255208801	0.209708349623862	GNPDA1	brown	UniprotAccessions-brown_DINCH_4_h_strict_GS4_MM4	19	Cluster 3	P46926	vs_LPS	MINCH	24	1d_MINCH_10000nM		brown_DINCH_4_h
411	1d_MINCH_10000nM_ctrlLPS	NA	NA	ALDH3A2	brown	UniprotAccessions-brown_DINCH_4_h_strict_GS4_MM4	13	Cluster 2	P51648	vs_LPS	MINCH	24	1d_MINCH_10000nM		brown_DINCH_4_h
412	1d_MINCH_10000nM_ctrlLPS	-0.00306373980270272	0.952883166731605	SUCLG1	brown	UniprotAccessions-brown_DINCH_4_h_strict_GS4_MM4	8	Cluster 3	P53597	vs_LPS	MINCH	24	1d_MINCH_10000nM		brown_DINCH_4_h
[truncated: 17,561 more rows]
